# Supplementary material for: Comparative Omics-Driven Genome Annotation Refinement: Application across Yersiniae
Source: PubMed Central journal article supplement (PMC3313959; doi:10.1371/journal.pone.0033903), 2012-03-27

Peptide and oligo evidence for each of the three examined strains is provided as visualized using the Artemis viewer. Forward and reverse DNA strains are labeled along with each of the six translational reading frames. Vertical black bars represent stop codons, white regions represent DNA features, cyan regions represent protein coding regions, yellow regions represent oligo evidence, and magenta regions represent peptide evidence. Errors are assigned arbitrary numerical values for organization only, and each proposed protein error (along with orthologs from remaining examined strains) is represented on an individual page.

# Error 1

Strain: *Y. pestis* CO92  
Gene: YPO0089

Classification: expressed pseudogene  
Boundaries of gene: complement (99525..100193)

Oligo evidence:

attccagacggtgacgttgctgctcaatttgactgtatgccagaaagcgaagtgacgtgatgact  
gttatcttctgccactggcattactaaagtgacctgctagaaggtatctatcgtaaaggaatattg

Peptide evidence:

HDGIIAAMQQLGVK  
KGNMATTETLLIR  
LDGDMQGRLLPR

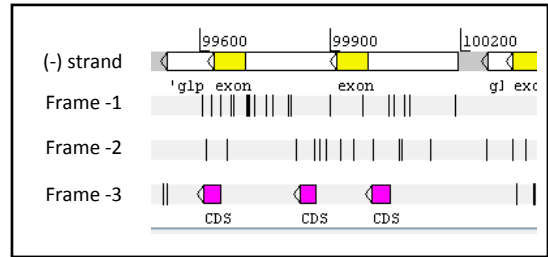

Proposed sequence (peptide evidence in red): 222aa

APDMYMEKLVVGPAAKGAIDLNLPLEQNLNCNIATALNKPLADLTVITLAKPR**HDGIIAAMQQLGVK**VFAIPDGDVAASILTCMPSEVDVVMYCIGGAPEGVISA AVIR**LDGDMQGRLLPR**H  
QVKGDSEDNRRIGEQELLRCKSMGIEAGNVLQLGDMARNDNVIFSATGITKGDLLGEGIYR**KGNMATTETLLIR**GKSRTRIRRIRSTHFLDRKDPALHEFLL

Strain: *Y. pestis* pestoides F  
Gene: YPDFS\_3814

Classification: annotated as glpX  
Boundaries of gene: 4383581..4384591

Oligo evidence:

tagaaaggtatagaattcttgcctatattcagtttttctattccgcaatcaacaggtctaaccatgaaa  
atattcagtttttctattccgcaatcaacaggtctaaccatgaaaagtgattgacatcgagttttccc  
atccagacggtgacgttgctgctcaatttgactgtatgccagaaagcgaagtgacgtgatgact  
gttatcttctgccactggcattactaaagtgacctgctagaaggtatctatcgtaaaggaatattg

Peptide evidence:

GDKNAADGAAVQAMR  
GNMATTETLLIR  
HDGIIAAMQQLGVK  
IMLNQVNIDGR  
KGNMATTETLLIR  
LDGDMQGRLLPR  
NAADGAAVQAMR  
NDNVIFSATGITK  
SMGIEAGNVLQLGDMAR  
VFAIPDGDVAASILTCMPSEVDVVMYCIGGAPEGVISA AVIR  
VTEAALAGYK

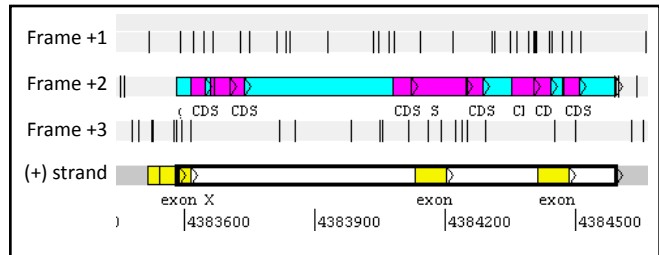

Current sequence (peptide evidence in red): 336aa

MKRELAIEFSR**VTEAALAGYK**WLGR**GDKNAADGAAVQAMR**IMLNQVNIDGRIVIGEGEIDEAPMLFIGEHVGTGGQDAVDIAVDPIEGTRMTAMGQANALAVLAVGDQGTFLHAPDM  
YMEKLVVGPAAKGAIDLNLPLEQNLNCNIATALNKPLADLTVITLAKPR**HDGIIAAMQQLGVK**VFAIPDGDVAASILTCMPSEVDVVMYCIGGAPEGVISA AVIR**LDGDMQGRLLPR**HQVKG  
DSEDNRRIGEQELLRCKSMGIEAGNVLQLGDMARNDNVIFSATGITKGDLLGEGIYR**KGNMATTETLLIR**GKSRTRIRRIRSTHFLDRKDPALHEFLL

Strain: *Y. pseudotuberculosis* PB1/+  
Gene: YPTS\_0089

Classification: annotated as glpX  
Boundaries of gene: complement (91704..92714)

Oligo evidence:

gttatcttctgccactggcattactaaagtgacctgctagaaggtatctatcgtaaaggaatattg  
attccagacggtgacgttgctgctcaatttgactgtatgccagaaagcgaagtgacgtgatgact  
atattcagtttttctattccgcaatcaacaggtctaaccatgaaacgtgaattgacatcgagttttccc  
atattcagtttttctattccgcaatcaacaggtctaaccatgaaacgtgaattgacatcgagttttccc

Peptide evidence:

ALDGDMMQGR  
GDKNAADGAAVQAMR  
GDLLGEGIYR  
HDGIIAAMQQLGVK  
IGEQLLR  
IMLNQVNIDGR  
KDPALHEFLL  
KGNMATTETLLIR  
NAADGAAVQAMR  
NDNVIFSATGITK  
STHFLDRKDPALHEFLL  
VFAIPDGDVAASILTCMPSEVDVVMYCIGGAPEGVISA AVIR  
VTEAALAGYK

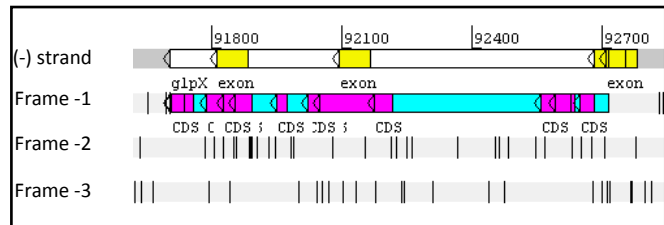

Current sequence (peptide evidence in red): 336aa

MKRELAIEFSR**VTEAALAGYK**WLGR**GDKNAADGAAVQAMR**IMLNQVNIDGRIVIGEGEIDEAPMLFIGEHVGTGGQDAVDIAVDPIEGTRMTAMGQANALAVLAVGDQGTFLHAPDM  
YMEKLVVGPAAKGAIDLNLPLEQNLNCNIATALNKPLADLTVITLAKPR**HDGIIAAMQQLGVK**VFAIPDGDVAASILTCMPSEVDVVMYCIGGAPEGVISA AVIR**LDGDMQGRLLPR**HQVKG  
DSEDNRR**IGEQLLR**CKSMGIEAGNVLQLGDMARNDNVIFSATGITKGDLLGEGIYR**KGNMATTETLLIR**GKSRTRIRRIRSTHFLDRKDPALHEFLL

# Error 2

Strain: *Y. pestis* CO92  
Gene: YPO0090

Classification: expressed pseudogene (glpK)  
Boundaries of gene: complement (100264..101355)

Oligo evidence:

tacgtgatgaattgaagttgataggcgatgccaccgattctgagtatttcgaccaaagtgaaaaacag

Peptide evidence:

HNTGLVVDPYFSGTK  
YIVALDQGTSSR

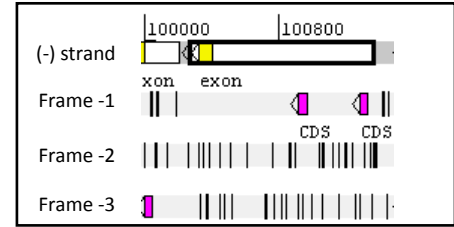

Proposed sequence (peptide evidence in red): 363aa

MTTENTTQKKYIVALDQGTSSRAVLDHNANIVSVSQRFTQIYPKAGVWEHDPMEIOWATQSSTLIEVLAKAGINSDEIAGIGITNQRETTIVWDKVTGKPVYNAIVWQCRRTADICEKLLK  
EGLLEEYIRHNTGLVVDPYFSGTKVKWILDNVEGARERAERGELLFGTVDTWLVWNMTQGRVHVTDYTNASRTMMFNIRTKEWDDRMLKALNIPRAMLPEVRPSSEIYGKTNIGKGGTRI  
PIAGIAGDQQAALFGQLCVQPGMAKNTYGTGCFLLMNTGEEAVQSTHGLLTTIACGPRGEVNYALEGAVFIGGASIQWLRDELKLGIDATDSEYFATKVKNSNGVYVVPFTGLGAPYWD

Strain: *Y. pestis* pestoides F  
Gene: YPDSF\_3813

Classification: annotated as hypothetical protein  
Boundaries of gene: 4381821..4383344

Oligo evidence:

tacgtgatgaattgaagttgataggcgatgccaccgattctgagtatttcgaccaaagtgaaaaacag  
ttctgggatgacctcgatgaggtgaagagtaaagcaagcattgaacgcgaattccgtccaggattgaaa

Peptide evidence:

AGINSDEIAGIGITNQ  
AGVWEHDPMEIOWATQSSTLIEVLAK  
AMLPEVRPSSEIYGK  
ATLESIAQTR  
DVLDMQADSGAR  
EFRPGIETTER  
ESTALGAAFLAGLATGFWDLLDEVK  
GVNSNHIIR  
HNTGLVVDPYFSGTK  
NSNGVYVVPFTGLGAPYWDYAR  
VHVTDYTNASR  
YIVALDQGTSSR

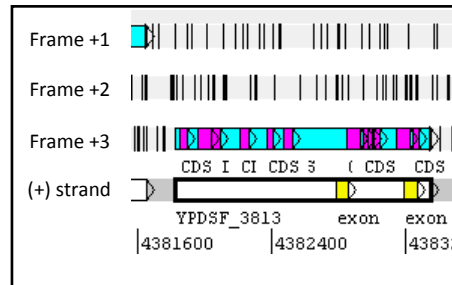

Current sequence (peptide evidence in red): 507aa

MTTENTTQKKYIVALDQGTSSRAVLDHNANIVSVSQRFTQIYPKAGVWEHDPMEIOWATQSSTLIEVLAKAGINSDEIAGIGITNQRETTIVWDKVTGKPVYNAIVWQCRRTADICEKLLK  
EGLLEEYIRHNTGLVVDPYFSGTKVKWILDNVEGARERAERGELLFGTVDTWLVWNMTQGRVHVTDYTNASRTMMFNIRTKEWDDRMLKALNIPRAMLPEVRPSSEIYGKTNIGKGGTRI  
PIAGIAGDQQAALFGQLCVQPGMAKNTYGTGCFLLMNTGEEAVQSTHGLLTTIACGPRGEVNYALEGAVFIGGASIQWLRDELKLGIDATDSEYFATKVKNSNGVYVVPFTGLGAPYWD  
YARGAIFGLTRGVNSNHIIRATLESIAQTRDVLDMQADSGARLKSRLVDGGAVANNFLMQFQADILGTRVERPAIRESTALGAAFLAGLATGFWDLLDEVKSKASIEREFRPGIETTERDIR  
YKGWKKAVARARDWEEHDE

Strain: *Y. pseudotuberculosis* PB1/+  
Gene: YPTS\_0090

Classification: annotated as glycerol kinase  
Boundaries of gene: complement (92967..94490)

Oligo evidence:

ttctgggatgacctcgatgaggtgaagagtaaagcaagcattgaacgcgaattccgtccaggattgaaa  
tacgtgatgaattgaagttgataggcgatgccaccgattctgagtatttcgaccaaagtgaaaaacag

Peptide evidence:

AGINSDEIAGIGITNQ  
AGVWEHDPMEIOWATQSSTLIEVLAK  
AMLPEVRPSSEIYGK  
ATLESIAQTR  
AVLDHNANIVSVSQR  
DVLDMQADSGAR  
EFRPGIETTER  
ESTALGAAFLAGLATGFWDLLDEVK  
GEVNYALEGAVFIGGASIQWLRDELK  
GVNSNHIIR  
HNTGLVVDPYFSGTK  
LIGDATDSEYFATK  
LKKEGLEEYIR  
NSNGVYVVPFTGLGAPYWDYAR  
VDGGAVANNFLMQFQADILGTR  
VHVTDYTNASR  
YIVALDQGTSSR

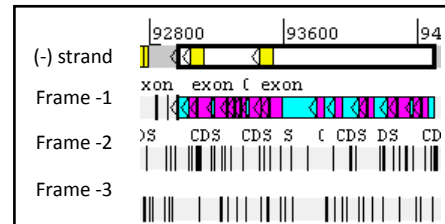

Current sequence (peptide evidence in red): 507aa

MTTENTTQKKYIVALDQGTSSRAVLDHNANIVSVSQRFTQIYPKAGVWEHDPMEIOWATQSSTLIEVLAKAGINSDEIAGIGITNQRETTIVWDKVTGKPVYNAIVWQCRRTADICEKLLK  
EGLLEEYIRHNTGLVVDPYFSGTKVKWILDNVEGARERAERGELLFGTVDTWLVWNMTQGRVHVTDYTNASRTMMFNIRTKEWDDRMLKALNIPRAMLPEVRPSSEIYGKTNIGKGGTRI  
PIAGIAGDQQAALFGQLCVQPGMAKNTYGTGCFLLMNTGEEAVQSTHGLLTTIACGPRGEVNYALEGAVFIGGASIQWLRDELKLGIDATDSEYFATKVKNSNGVYVVPFTGLGAPYWD  
YARGAIFGLTRGVNSNHIIRATLESIAQTRDVLDMQADSGARLKSRLVDGGAVANNFLMQFQADILGTRVERPAIRESTALGAAFLAGLATGFWDLLDEVKSKASIEREFRPGIETTERDIR  
YKGWKKAVARARDWEEHDE

# Error 3

Strain: *Y. pestis* CO92  
Gene: YPO0115

Classification: expressed pseudogene (metB)  
Boundaries of gene: Frame+3:122247..123235  
Frame+2:123233..123406

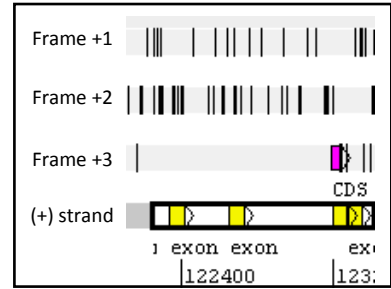

## Oligo evidence:

```
tttcagctactacaattttattgatttaacagccgcgcacgcatgactattcacgtcgtgtaatcc
ggcggagaaaccgaagttggtcttgattgaaacaccagtaatccattgctacgggttgatattgcc
ttgagctatttacctggcagagctctttggggggtagaaaacctgatcccatgcagcaccatgacc
gcgggtatggcggcagagggcgctattgccgagcattactgatagtttggcgtattccgtgggta
```

## Peptide evidence:

FLSALELFTLAESLGG

## Proposed sequence (peptide evidence in red):

Frame+3: 330aa

MTRKQATIAVRSGLNDDDEQYGCVVPPIHLSSTYNFIDFNQPRTHDYSRRGNPTRDVVQRALAELEGGAGAVMTSSGMSALHLVCTTFLOPGDLLVAPHDCYGGSYRFLDLSKRGAYRVLFV  
DQGDEAALNCALAEKPKLVLIETPSNPLLRVVDIAAICQAARAAGALTVCNDTFLSPALQQPLSLGADLVVHSTKYLNHGSDDVAVAGAVIAKDPPELVVLAWWANNIGVTGAAFDSYLLRGL  
RTLSPRMAQQQRNADDIVRYLQQQLVKKLYHPSLPQHPGHEIACRQQSGFGAMLSFELDGDEQVMRR**FLSALELFTLAESLGG**

Frame+2: 58aa

VESLISHAATMTHAGMAAEARIAAGITDSSLRISVGIEDSEDLIADLDHAFQLAVTR

Strain: *Y. pestis* pestoides F  
Gene: YPDSF\_3792

Classification: annotated as cystathionine gamma-synthase  
Boundaries of gene: complement (4361729..4362889)

## Oligo evidence:

```
gcgggtatggcggcagagggcgctattgccgagcattactgatagtttggcgtattccgtgggta
ggcggagaaaccgaagttggtcttgattgaaacaccagtaatccattgctacgggttgatattgcc
tttcagctactacaattttattgatttaacagccgcgcacgcatgactattcacgtcgtgtaatcc
```

## Peptide evidence:

ISVGIEDSEDLIADLDHAFQLAVTR

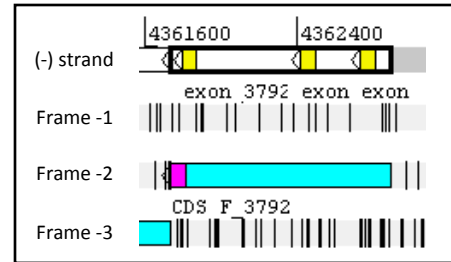

## Current sequence (peptide evidence in red): 386aa

MTRKQATIAVRSGLNDDDEQYGCVVPPIHLSSTYNFIDFNQPRTHDYSRRGNPTRDVVQRALAELEGGAGAVMTSSGMSALHLVCTTFLOPGDLLVAPHDCYGGSYRFLDLSKRGAYRVLFV  
DQGDEAALNCALAEKPKLVLIETPSNPLLRVVDIAAICQAARAAGALTVCNDTFLSPALQQPLSLGADLVVHSTKYLNHGSDDVAVAGAVIAKDPPELVVLAWWANNIGVTGAAFDSYLLRGL  
RTLSPRMAQQQRNADDIVRYLQQQLVKKLYHPSLPQHPGHEIACRQQSGFGAMLSFELDGDEQVMRR**FLSALELFTLAESLGGVESLISHAATMTHAGMAAEARIAAGITDSSLRISVGI  
E** **D** **S** **E** **D** **L** **I** **A** **D** **L** **D** **H** **A** **F** **Q** **L** **A** **V** **T** **R**

Strain: *Y. pseudotuberculosis* PB1/+  
Gene: YPTS\_0108

Classification: annotated as cystathionine gamma-synthase  
Boundaries of gene: 112651..113892

## Oligo evidence:

```
gttgaatgatgacgacgaatacggctgctgtcccccgattcaccttcagactactacaattttatt
ggcggagaaaccgaagttggtcttgattgaaacaccagtaatccattgctacgggttgatattgcc
gcgggtatggcggcagagggcgctattgccgagcattactgatagtttggcgtattccgtgggta
```

## Peptide evidence:

ISVGIEDSEDLIADLDHAFQLAVTR

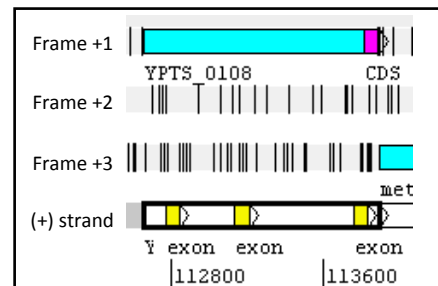

## Current sequence (peptide evidence in red): 413aa

MSRCIDVRILCVYSGVTFSRSLVEINMTRKQATIAVRSGLNDDDEQYGCVVPPIHLSSTYNFIDFNQPRTHDYSRRGNPTRDVVQRALAELEGGAGAVMTSSGMSAIHLVCTTFLOPGDLLVA  
PHDCYGGSYRFLDLSKRGAYRVLFVDQGDEAALNRALAEKPKLVLIETPSNPLLRVVDIAAICQAARAAGALTVCNDTFLSPALQQPLSLGADLVVHSTKYLNHGSDDVAVAGAVIAKDPPELVV  
ELAWWANNIGVTGAAFDSYLLRGLRTLSPRMAQQQRNADDIVRYLQQQLVKKLYHPSLPQHPGHEIACRQQSGFGAMLSFELDGDEQVMRR**FLSALELFTLAESLGGVESLISHAATM  
HAGMAAEARIAAGITDSSLRISVGIEDSEDLIADLDHAFQLAVTR**

# Error 4

Strain: *Y. pestis* CO92  
Gene: YPO0124

Classification: expressed pseudogene (malP)  
Boundaries of gene: Frame+2: 134066..134389  
Frame+1: 134389..136467

## Oligo evidence:

tacattcgatggagtttttaattgctgttgacagctaataacctaataatctgggttgatgaca  
tgcatcggatctcattatcaagatctgtccctgagattaccaattggccaataaattccaca

## Peptide evidence:

DDFLAALTR  
FGLTSAQMTPYQWWEAVSAALAEQLSAQPAPSKPK  
HVNYSMEFLIGR  
KDDFLAALTR  
LTANNLNLGWYDTPVALLAEQQVK  
DELAGAFSQGDK  
DLFPEYYQLWPNK  
DNPALDIAPR  
FHNVTNGITPR  
FLLAEQNGVEAEKLT

GEAWDLPVLGFR  
HFVIKQINAQFK  
HNAALAVDVGFGNLVK  
KLAELPDYEVIQLNDHTPTIAIPEMLR  
LAELPDYEVIQLNDHTPTIAIPEMLR  
LKVVFIPIYR  
LWQATHQHPFDLTLFNDGK  
NIIYAINQVADK  
NIIYAINQVADKINNDPIVKDR  
PNDNHLAGKR  
QCNPALSGLIIDDTLK

QHLNLLHLSLYR  
QIRDNPALDIAPR  
RAILNTR  
RVMGLVINPDAIFDVQIKR  
VEWANDLDVLQDLEPYAEDPAFR  
VGMFSSDR  
VLLDEHQLSWDAAWAITSK  
VLYPNDNHLAGK  
VLYPNDNHLAGKR  
VMGLVINPDAIFDVQIK  
VSVaelMIPAAADVSEQISTAGK

Proposed sequence (peptide evidence in red):

Frame+2: 109aa

MSQPMLK**KDDFLAALTR**QWQRFGLTSAQMTPYQWWEAVSAALAEQLSAQPAPSKPKNVQRHVNYSMEFLIGRLTANNLNLGWYDTPVALLAEQQVKLSDLLEQET

Frame+1: 693aa

DPALNGGLGRLAACFLDSMATVEQPATGYGLNYQYGLFRQSFRECKQEQEAPDNWQRESYPWFRHNAALAVDVGFGNLVKQADGRQLWRPAFTLRGEAWDLPVLGFRNGVTQPLRLWQATHQHPFDLTLFNDGKFLAEQNGVEAEKLTKVLPND  
NHLAGKRRLMQQYFQCACSVADILRKHLAGR**KLAELPDYEVIQLNDHTPTIAIPEMLR**VLLDEHQLSWDAAWAITSKTFAYTNHTLMPALECWDKLVRSLLPRHFVIKQINAQFKLVNKQWPGNDEVWAKLAVHHNKQVRMANLCVSGFAVNG  
VAQLHSDLIIDKDLFPEYYQLWPNKFHNVTNGITPRRWLKCQNPALSGLIIDDTLKVVEWANDLDVLQDLEPYAEDPAFRQRYQQIKYDNKVLHAHYVRVMGLVINPDAIFDVQIKRHEYKRQHLNLLHLSLYRQIRDNPALDIAPRVLFGAKAAPGYLAKNII  
YAINQVADKINNDPIVKDRLKVVFIPIYRVSVAELMIPAAADVSEQISTAGKEASGTGNMGMALNGALVTGLDGANVEIAEQVGDENIFIGHVTVDQVKAILAKGYQPKYKADPHLSILDELAGAFSQGDKQAFDMMMLHSLLEGGDPYLVADFAFASYCQ  
AQKQIDALYRDKDEWTRRAILNTRAVGMFSSDRSIRDYQQRIVQAKR

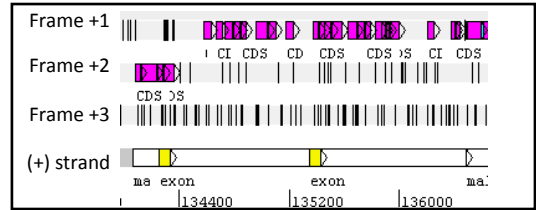

Strain: *Y. pestis* pestoides F  
Gene: YPDSF\_0052

Classification: glycogen/starch  
/alpha-glucan phosphorylase  
Boundaries of gene: 62556..64961

## Oligo evidence:

tacattcgatggagtttttaattgctgttgacagctaataacctaataatctgggttgatgaca  
tgcatcggatctcattatcaagatctgtccctgagattaccaattggccaataaattccaca

## Peptide evidence:

DDFLAALTR  
DELAGAFSQGDK  
DLFPEYYQLWPNK  
DLFPEYYQLWPNKFHNVTNGITPR  
DNPALDIAPR  
DSMATVEQPATGYGLNYQYGLFR  
FGLTSAQMTPYQWWEAVSAALAEQLSAQPAPSKPK  
FHNVTNGITPR  
FLLAEQNGVEAEK  
GEAWDLPVLGFR  
HFVIKQINAQFK  
HNAALAVDVGFGNLVK  
HVNYSMEFLIGR  
INNDPIVKDR  
KDDFLAALTR

KLAELPDYEVIQLNDHTPTIAIPEMLR  
LAELPDYEVIQLNDHTPTIAIPEMLR  
LKVVFIPIYR  
LMQQYFQCACSVADILR  
LSDLLEQETDPALNGGLGR  
LTANNLNLGWYDTPVALLAEQQVK  
LWQATHQHPFDLTLFNDGK  
NIIYAINQVADK  
NIIYAINQVADKINNDPIVK  
NIIYAINQVADKINNDPIVKDR  
PNDNHLAGKR  
QHLNLLHLSLYR  
QIRDNPALDIAPR  
RAILNTR  
RVMGLVINPDAIFDVQIK

RVMGLVINPDAIFDVQIKR  
SILDELAGAFSQGDK  
VEWANDLDVLQDLEPYAEDPAFR  
VGMFSSDR  
VLLDEHQLSWDAAWAITSK  
VLYPNDNHLAGK  
VLYPNDNHLAGKR  
VMGLVINPDAIFDVQIK  
VGLVINPDAIFDVQIKR  
VSVaelMIPAAADVSEQISTAGK

Current sequence (peptide evidence in red): 801aa

MSQPMLK**KDDFLAALTR**QWQRFGLTSAQMTPYQWWEAVSAALAEQLSAQPAPSKPKNVQRHVNYSMEFLIGRLTANNLNLGWYDTPVALLAEQQVKLSDLLEQETDPALNGGLGRLAACFLDSMATVEQPATGYGLNYQYGLFRQSFRECKQEQE  
APDNWQRESYPWFRHNAALAVDVGFGNLVKQADGRQLWRPAFTLRGEAWDLPVLGFRNGVTQPLRLWQATHQHPFDLTLFNDGKFLAEQNGVEAEKLTKVLPNDNHLAGKRRLMQQYFQCACSVADILRKHLAGR**KLAELPDYEVIQLNDHTP  
TIAIPEMLR**VLLDEHQLSWDAAWAITSKTFAYTNHTLMPALECWDKLVRSLLPRHFVIKQINAQFKLVNKQWPGNDEVWAKLAVHHNKQVRMANLCVSGFAVNGVAQLHSDLIIDKDLFPEYYQLWPNKFHNVTNGITPRRWLKCQNPALSGLIIDT  
LK**VEWANDLDVLQDLEPYAEDPAFR**QRYQQIKYDNKVLHAHYVR**RVMGLVINPDAIFDVQIK**RHEYKR**QHLNLLHLSLYRQIRDNPALDIAPR**VLFGAKAAPGYLAK**NIIYAINQVADKINNDPIVKDR**LKVVFIPIYRVSVAELMIPAAADVSEQISTAGKEA  
SGTGNMGMALNGALVTGLDGANVEIAEQVGDENIFIGHVTVDQVKAILAKGYQPKYKADPHLSILDELAGAFSQGDKQAFDMMMLHSLLEGGDPYLVADFAFASYCQAKQKIDALYRDKDEWTRRAILNTRAVGMFSSDRSIRDYQQRIVQAKR

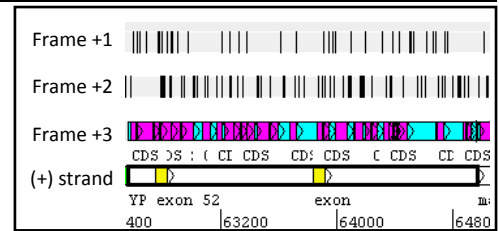

Strain: *Y. pseudotuberculosis* PB1/+  
Gene: YPTS\_3971

Classification: glycogen/starch/alpha-glucan phosphorylase  
Boundaries of gene: complement (4411252..4413657)

## Oligo evidence:

tgcatcggatctcattatcaagatctgtccctgagattaccaattggccaataaattccaca  
tacattcgatggagtttttaattgctgttgacagctaataacctaataatctgggttgatgaca

## Peptide evidence:

DDFLAALTR  
DNPALDIAPR  
FGLTSAQMTPYQWWEAVSAALAEQLSAQPAPSKPK  
FHNVTNGITPR  
FLLAEQNGVEAEK  
FLLAEQNGVEAEKLT  
GEAWDLPVLGFR  
HNAALAVDVGFGNLVK  
HVNYSMEFLIGR  
KDDFLAALTR  
KLAELPDYEVIQLNDHTPTIAIPEMLR  
LAELPDYEVIQLNDHTPTIAIPEMLR  
LKVVFIPIYR

LSDLLEQETDPALNGGLGR  
LTANNLNLGWYDTPVALLAEQQVK  
LWQATHQHPFDLTLFNDGK  
NIIYAINQVADK  
NIIYAINQVADKINNDPIVK  
NIIYAINQVADKINNDPIVKDR  
QHLNLLHLSLYR  
QIRDNPALDIAPR  
QEQEAPDNWQ  
RAILNTR  
RVMGLVINPDAIFDVQIKR  
SILDELAGAFSQGDK  
VEWANDLDVLQDLEPYAEDPAFR  
VGMFSSDR

VLLDEHQLSWDAAWAITSK  
VLYPNDNHLAGK  
VLYPNDNHLAGKR  
VMGLVINPDAIFDVQIK  
VSVaelMIPAAADVSEQISTAGK

Current sequence (peptide evidence in red): 801aa

MSQPMLK**KDDFLAALTR**QWQRFGLTSAQMTPYQWWEAVSAALAEQLSAQPAPSKPKNVQRHVNYSMEFLIGRLTANNLNLGWYDTPVALLAEQQVKLSDLLEQETDPALNGGLGRLAACFLDSMATVEQPATGYGLNYQYGLFRQSFRECKQEQE  
APDNWQRESYPWFRHNAALAVDVGFGNLVKQADGRQLWRPAFTLRGEAWDLPVLGFRNGVTQPLRLWQATHQHPFDLTLFNDGKFLAEQNGVEAEKLTKVLPNDNHLAGKRRLMQQYFQCACSVADILRKHLAGR**KLAELPDYEVIQLNDHTP  
TIAIPEMLR**VLLDEHQLSWDAAWAITSKTFAYTNHTLMPALECWDKLVRSLLPRHFVIKQINAQFKLVNKQWPGNDEVWAKLAVHHNKQVRMANLCVSGFAVNGVAQLHSDLIIDKDLFPEYYQLWPNKFHNVTNGITPRRWLKCQNPALSGLIIDT  
LK**VEWANDLDVLQDLEPYAEDPAFR**QRYQQIKYDNKVLHAHYVR**RVMGLVINPDAIFDVQIK**RHEYKR**QHLNLLHLSLYRQIRDNPALDIAPR**VLFGAKAAPGYLAK**NIIYAINQVADKINNDPIVKDR**LKVVFIPIYRVSVAELMIPAAADVSEQISTAGKEA  
SGTGNMGMALNGALVTGLDGANVEIAEQVGDENIFIGHVTVDQVKAILAKGYQPKYKADPHLSILDELAGAFSQGDKQAFDMMMLHSLLEGGDPYLVADFAFASYCQAKQKIDALYRDKDEWTRRAILNTRAVGMFSSDRSIRDYQQRIVQAKR

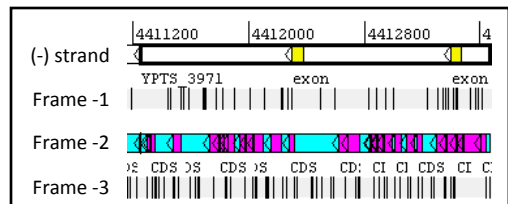

# Error 5

Strain: *Y. pestis* CO92  
Gene: YPO0170

Classification: expressed pseudogene  
Boundaries of gene: Frame+2, Region 1: 189506..190051  
Frame+2, Region 2: 192011..192694

Oligo evidence:  
NA

Peptide evidence:

IIAFHNAFHGR  
NTFDQVILPVYAPAQFIPVK  
HGLFVQALQSINSK  
LAPSLVIELEDIQQGMAR

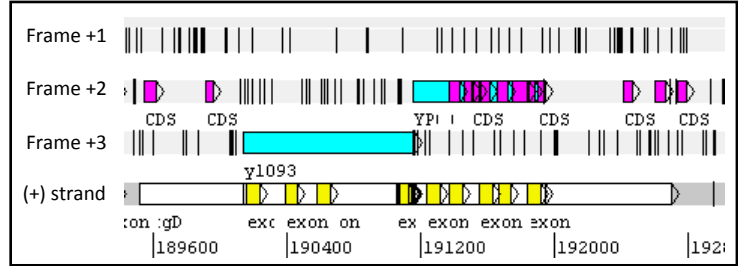

Proposed sequence (peptide evidence in red):

Region 1: 182aa

VGSVMTDKLAVNR**NTFDQVILPVYAPAQFIPVK**GKGSRVWDQQGTEYIDFAGGIAVTALGHCHPALVSALHQQGETLWHTSNVFTNEPALRLAQKLIATFADRFFANS~~GAEANEAA~~FKLARHYAIERHSPYKTK**IIAFHNAFHGR**TLFTVSVGGQPKYSDGFGPKPADIIHVPFNDLAAV

Region 2: 227aa

KAVMDDHTCAVVLEPIQGEGGITSATPEFLQGVRLCDQHNALLVFDEVQSGMGRSGKLF~~SYMHY~~**VTPDILTAKALGGGFPISAMLTTEEIASVMTVGTHGTTYGGNPLACAVAEALD**VINTPEVLNGIEQR**HGLFVQALQSINSK**YDVFSDIRGMGLLIGAE~~LTAKYR~~QAREFLAAAAANGLMILNAGPDVLR**LAPSLVIELEDIQQGMAR**LEKAMASVIKG

Strain: *Y. pestis* pestoides F  
Gene: YPDSF\_0098

Classification: annotated as argD  
Boundaries of gene: 117983..119200

Oligo evidence:

atatcatcatgtcccgtttaatgatctggcggcagtgaaagcggatgatgatcacacctgtgccgt

Peptide evidence:

IIAFHNAFHGR  
LFSYMHYGVTPDILTAK  
HGLFVQALQSINSK  
LAPSLVIELEDIQQGMAR  
NTFDQVILPVYAPAQFIPVK

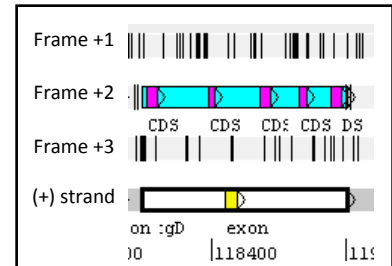

Current sequence (peptide evidence in red): 405aa

MTDKLAVNR**NTFDQVILPVYAPAQFIPVK**GKGSRVWDQQGTEYIDFAGGIAVTALGHCHPALVSALHQQGETLWHTSNVFTNEPALRLAQKLIATFADRFFANS~~GAEANEAA~~FKLARHYAIERHSPYKTK**IIAFHNAFHGR**TLFTVSVGGQPKYSDGFGPKPADIIHVPFNDLAAVKAVMDDHTCAVVLEPIQGEGGITSATPEFLQGVRLCDQHNALLVFDEVQSGMGRSGK**LFSYMHYGVTPDILTAK**ALGGGFPISAMLTTEEIASVMTVGTHGTTYGGNPLACAVAEALD**VINTPEVLNGIEQRHGLFVQALQSINSK**YDVFSDIRGMGLLIGAE~~LTAKYR~~QAREFLAAAAANGLMILNAGPDVLR**LAPSLVIELEDIQQGMAR**LEKAMASVIKG

Strain: *Y. pseudotuberculosis* PB1/+  
Gene: YPTS\_3924

Classification: annotated as argD  
Boundaries of gene: complement (4356817..4358034)

Oligo evidence:

atatcatcatgtcccgtttaatgatctggcggcagtgaaagcggatgatgatcacacctgtgccgt

Peptide evidence:

HGLFVQALQSINSK  
IIAFHNAFHGR  
LAPSLVIELEDIQQGMAR  
LFSYMHYGVTPDILTAK  
NTFDQVILPVYAPAQFIPVK  
TLFTVSVGGQPK  
VFFANS~~GAEANEAA~~FKLARHYAIERHSPYKTK**IIAFHNAFHGR**TLFTVSVGGQPKYSDGFGPKPADIIHVPFNDLAAVKAVMDDHTCAVVLEPIQGEGGITSATPEFLQGVRLCDQHNALLVFDEVQSGMGRSGK**LFSYMHYGVTPDILTAK**ALGGGFPISAMLTTEEIASVMTVGTHGTTYGGNPLACAVAEALD**VINTPEVLNGIEQRHGLFVQALQSINSK**YDVFSDIRGMGLLIGAE~~LTAKYR~~QAREFLAAAAANGLMILNAGPDVLR**LAPSLVIELEDIQQGMAR**LEKAMASVIKG

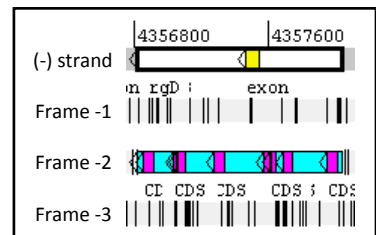

Current sequence (peptide evidence in red): 405aa

MTDKLAVNR**NTFDQVILPVYAPAQFIPVK**GKGSRVWDQQGTEYIDFAGGIAVTALGHCHPALVSALHQQGETLWHTSNVFTNEPALRLAQKLIATFADR**VFFANS**~~GAEANEAA~~FKLARHYAIERHSPYKTK**IIAFHNAFHGR**TLFTVSVGGQPKYSDGFGPKPADIIHVPFNDLAAVKAVMDDHTCAVVLEPIQGEGGITSATPEFLQGVRLCDQHNALLVFDEVQSGMGRSGK**LFSYMHYGVTPDILTAK**ALGGGFPISAMLTTEEIASVMTVGTHGTTYGGNPLACAVAEALD**VINTPEVLNGIEQRHGLFVQALQSINSK**YDVFSDIRGMGLLIGAE~~LTAKYR~~QAREFLAAAAANGLMILNAGPDVLR**LAPSLVIELEDIQQGMAR**LEKAMASVIKG

# Error 6

Strain: *Y. pestis* CO92  
Gene: YPO0188

Classification: expressed pseudogene  
Boundaries of gene: Frame -1: complement (207454..207981)  
Frame -2: complement (206063..207457)

Oligo evidence:

tgttatcgacggtgaccgcgaatatcgccagttggaggccgaactcaggctccaatgaaaaaatgat  
taccttggtattaattcccatgaccgcgattccttgatcctattatcgataagatttgcattatgaa

Peptide evidence:

MIVFSSLQIRRGTRVLLDNATATINPGQK  
ADESPLQHMSR  
DYLGGYGFQGDQVTDPTAR  
LLAGTLEPQSGEIALSK  
LSTELAAIEAQLADSALYDIAR

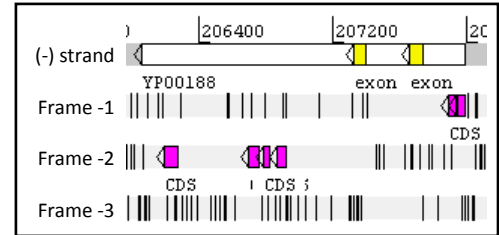

Proposed sequence (peptide evidence in red):

Frame-1: 176aa

MIVFSSLQIRRGTRVLLDNATATINPGQK VGLVGKNGCGKSTLLALLKGELSADGGNVTFPNNWALAWVNQETPALDIPAIEYVIDGDREYRQLEAELQAANEKNDGHAIATVHGKLDIAIHA  
WTIQSRAASLLHGLGFSQEKLQQPVRFSFGGWRMRLNLAQALVCRSDLLLLDEP

Frame-2: 464aa

TNHLDLDAVIWLEKWLKSYTGTLVLISHDRDFLDPIIDKILHIEQQLTNEYTGNYSFFERQRATKLSQQQSMYQHQQEKVAHLQSYIDRFRAQATKAKQAQSRKMLERMELIAPAHVDNPFH  
FSFRTPESLPDPLLRMDKVSAGYGENTVLQSIKLNLPVGSRIQLLGRNGAGKSTLIKLLAGTLEPQSGEIALSKGIKLG YFAQHLEFLRADESPLQHMSRLAPKESEQQLRDYLG GYGFQGDQV  
TDPTARFSGGEKARLVLALIIWQRPNLLLLDEPTNHLDLDMRQALTEALIDFEGALVVVSHDRHLLRSTTDDLYLVHDGKVEQFDGLEDYQQWLVDSDRQQSQSQDNPAKELSGNSAQQRK  
DQKRRDAEFRTQTQPLRKQIMTLEKQMDK LSTELAAIEAQLADSALYDIAR KADLTQCLLQQTQVKSLEETEMQWLDVQEQLEILTKEFSADADI

Strain: *Y. pestis* pestoides F  
Gene: YPDSF\_0114

Classification: putative ABC transporter ATP-binding protein  
Boundaries of gene: complement (132570..134492)

Oligo evidence:

tactctggtattaattcccatgaccgcgattccttgatcctattatcgataagatttgcattatgaa  
tgttatcgacggtgaccgcgaatatcgccagttggaggccgaactcaggctccaatgaaaaaatgat

Peptide evidence:

AASLLHGLGFSQEK  
ADESPLQHMSR  
AIEYVIDGDREYRQLEAELQAANEK  
DYLGGYGFQGDQVTDPTAR  
ELSGNSAQQR  
LGYFAQHLEFLR  
LSQQQSMYQHQQEK  
LSTELAAIEAQLADSALYDIAR  
VAHLQSYIDR  
VLLDNATATINPGQK

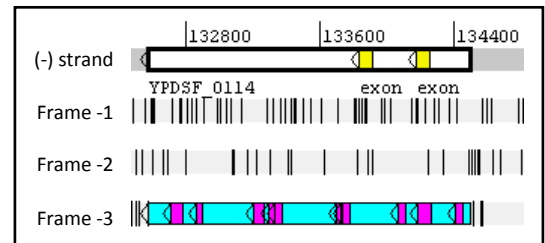

Current sequence (peptide evidence in red): 640aa

MIVFSSLQIRRGTRVLLDNATATINPGQK VGLVGKNGCGKSTLLALLKGELSADGGNVTFPNNWALAWVNQETPALDIPAIEYVIDGDREYRQLEAELQAANEKNDGHAIATVHGKLDIAIHA  
WTIQSRAASLLHGLGFSQEKLQQPVRFSFGGWRMRLNLAQALVCRSDLLLLDEPTNHLDLDAVIWLEKWLKSYTGTLVLISHDRDFLDPIIDKILHIEQQLTNEYTGNYSFFERQRATKLSQQQ  
SMYQHQQEKVAHLQSYIDRFRAQATKAKQAQSRKMLERMELIAPAHVDNPFHFSFRTPESLPDPLLRMDKVSAGYGENTVLQSIKLNLPVGSRIQLLGRNGAGKSTLIKLLAGTLEPQSGEIA  
LSKGKILGYFAQHLEFLRADESPLQHMSRLAPKESEQQLRDYLG GYGFQGDQVTDPTARFSGGEKARLVLALIIWQRPNLLLLDEPTNHLDLDMRQALTEALIDFEGALVVVSHDRHLLRST  
TDDLYLVHDGKVEQFDGLEDYQQWLVDSDRQQSQSQDNPAKELSGNSAQQRKDKQRRDAEFRTQTQPLRKQIMTLEKQMDK LSTELAAIEAQLADSALYDIAR KADLTQCLLQQTQVKS  
KLEETEMQWLDVQEQLEILTKEFSADADI

Strain: *Y. pseudotuberculosis* PB1/+  
Gene: YPTS\_3908

Classification: putative ABC transporter ATP-binding protein  
Boundaries of gene: 4341544..4343466

Oligo evidence:

tgttatcgacggtgaccgcgaatatcgccagttggaggccgaactcaggctccaatgaaaaaatgat  
taccttggtattaattcccatgaccgcgattccttgatcctattatcgataagatttgcattatgaa

Peptide evidence:

AASLLHGLGFSQEK  
DYLGGYGFQGDQVTDPTAR  
ELSGNSAQQR  
LSQQQSMYQHQQEK  
LSTELAAIEAQLADSALYDIAR  
QALTEALIDFEGALVVVSHDR  
QMDKLSTELAAIEAQLADSALYDIAR  
VLLDNATATINPGQK

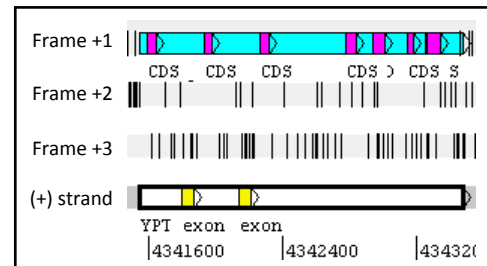

Current sequence (peptide evidence in red): 640aa

MIVFSSLQIRRGTRVLLDNATATINPGQK VGLVGKNGCGKSTLLALLKGELSADGGNVTFPNNWALAWVNQETPALDIPAIEYVIDGDREYRQLEAELQAANEKNDGHAIATVHGKLDIAIHA  
WTIQSRAASLLHGLGFSQEKLQQPVRFSFGGWRMRLNLAQALVCRSDLLLLDEPTNHLDLDAVIWLEKWLKSYTGTLVLISHDRDFLDPIIDKILHIEQQLTNEYTGNYSFFERQRATKLSQQQ  
SMYQHQQEKVAHLQSYIDRFRAQATKAKQAQSRKMLERMELIAPAHVDNPFHFSFRTPESLPDPLLRMDKVSAGYGENTVLQSIKLNLPVGSRIQLLGRNGAGKSTLIKLLAGTLEPQSGEIA  
LSKGKILGYFAQHLEFLRADESPLQHMSRLAPKESEQQLRDYLG GYGFQGDQVTDPTARFSGGEKARLVLALIIWQRPNLLLLDEPTNHLDLDMRQALTEALIDFEGALVVVSHDRHLLRST  
TDDLYLVHDGKVEQFDGLEDYQQWLVDSDRQQSQSQDNPAKELSGNSAQQRKDKQRRDAEFRTQTQPLRKQIMTLEKQMDK LSTELAAIEAQLADSALYDIAR KADLTQCLLQQTQVKS  
KLEETEMQWLDVQEQLEILTKEFSADADI

# Error 7

Strain: Y. pestis CO92  
Gene: YPO0247

Classification: expressed pseudogene  
Boundaries of gene: complement (245195..245725)

## Oligo evidence:

agatggaacaataatagaagatgatgtaatgattggtgcaggtagcctcattactccaggtaaacgctta  
tcaagtcatcattggggcacgttcaaatatccaagacggtagtgtgctacatgttaccaccaatctgag  
ggtaaacgagtcgatgatagatcgagtgatcattggcaatgtatttttagtgatgatgctag

## Peptide evidence:

QIRPLTPELEGLLYSAGNYVR

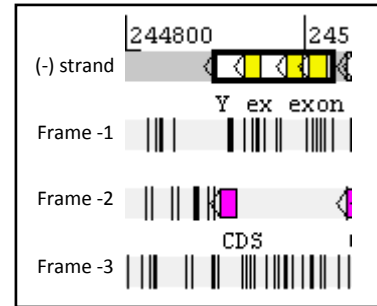

Proposed sequence (peptide evidence in red): 176aa

IRPYLHHSPTLGKRVIMDRSSVIIGNVILGDDVSVWPLVAIRGDVNQVIIGARSNIQDGSVLHVTHQSEHNPEGYPLIIGEDVTIGHKAMLHGCTIGNRVLVGMGSILLDGTIIEDDMIGAGSLI  
TPGKRLVSGYLVGSPAK**QIRPLTPELEGLLYSAGNYVR**WKDDYLAESK

Strain: Y. pestis pestoides F  
Gene: YPDSF\_0170

Classification: hypothetical protein  
Boundaries of gene: complement (171706..172248)

## Oligo evidence:

agatggaacaataatagaagatgatgtaatgattggtgcaggtagcctcattactccaggtaaacgctta  
tcaagtcatcattggggcacgttcaaatatccaagacggtagtgtgctacatgttaccaccaatctgag  
ggtaaacgagtcgatgatagatcgagtgatcattggcaatgtatttttagtgatgatgctag  
ctctatccgaccttctctcatcattcaccgacttaggtaaacgagtcgatgatagatcgagtg

## Peptide evidence:

QIRPLTPELEGLLYSAGNYVR  
LVSGYLVGSPAK

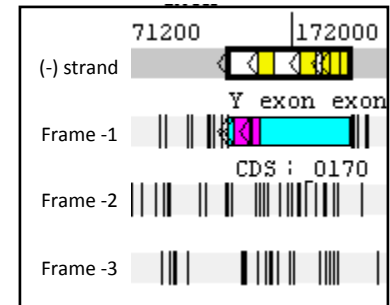

Current sequence (peptide evidence in red): 180aa

MCDSIRPYLHHSPTLGKRVIMDRSSVIIGNVILGDDVSVWPLVAIRGDVNQVIIGARSNIQDGSVLHVTHQSEHNPEGYPLIIGEDVTIGHKAMLHGCTIGNRVLVGMGSILLDGTIIEDDMIG  
AGSLITPGKRL**LVSGYLVGSPAKQIRPLTPELEGLLYSAGNYVR**WKDDYLAESK

Strain: Y. pseudotuberculosis PB1/+  
Gene: YPTS\_3851

Classification: hexapptide repeat-containing transferase  
Boundaries of gene: 4304535..4305077

## Oligo evidence:

ctctatccgaccttctctcatcattcaccgacttaggtaaacgagtcgatgatagatcgagtg  
ggtaaacgagtcgatgatagatcgagtgatcattggcaatgtatttttagtgatgatgctag  
tcaagtcatcattggggcacgttcaaatatccaagacggtagtgtgctacatgttaccaccaatctgag

## Peptide evidence:

LVSGYLVGSPAK  
QIRPLTPELEGLLYSAGNYVR  
SSVIIGNVILGDDVSVWPLVAIR  
VLVGMGSILLDGTIIEDDMIGAGSLIAPGKR

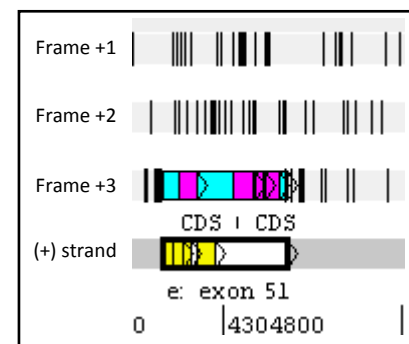

Current sequence (peptide evidence in red): 180aa

MCDSIRPYLHHSPTLGKRVIMDR**SSVIIGNVILGDDVSVWPLVAIR**GDVNQVIIGARSNIQDGSVLHVTHQSEHNPEGYPLIIGEDVTIGHKAMLHGCTIGNR**VLVGMGSILLDGTIIEDDMIG**  
**AGSLIAPGKRLVSGYLVGSPAKQIRPLTPELEGLLYSAGNYVR**WKDDYLAESK



# Error 8

Strain: *Y. pestis* CO92  
Gene: YPO0414

Classification: expressed pseudogene  
Boundaries of gene: Frame+1: 431515..431733  
Frame+2: 431735..432502

Oligo evidence:

atgagtgaagaggaactgctcgctcgctgctggtttattatcacgatggttaacacaaggggata  
atcacagcagggtcgttttagtcagttatccggcgggtgctcgctcctatatgacggggattggtcagttg

Peptide evidence:

DGLTQGDIGELLGLAR  
ASNAHVADTFR  
ASNAHVADTFRQENSVR  
ILPSLASLSISSR

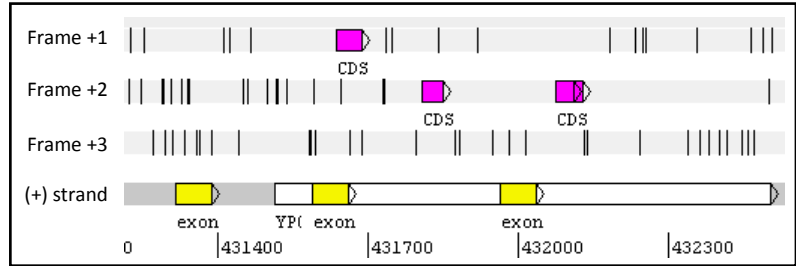

Proposed sequence (peptide evidence in red):

Frame+1: 74aa

MIKEKPAVKEKPLSSNDEYKYPGNSMSEEELLARVAWFYYH**DGLTQGDIGELLGLAR**LKVSRLLEKGRQSGVI

Frame+2: 255aa

INSRYEGCLELENTLQQHFGLKHIR**ILPSLASLSISSR**LIGIAAHLMLIQPQQLLAVGFGETTMCALQHLSGFASQQVRLVTLSSGGVGSYMTGIGQLDAACQVSIIPAPLR**ASNAHVADTFRQENSVR**RDVMLAACAAADIAVVGIGSVNQKKEATILRSGYISEGEQLMFSRKGAVGDILGYFIQADGALVPMQIHQELIGISLADLTTIPTVIGVAGGVEKADVIVAALRGRYVNALVTDEVTARAIINLL

Strain: *Y. pestis* pestoides F  
Gene: YPDSF\_3217

Classification: transcriptional repressor  
Boundaries of gene: complement (3666459..3667379)

Oligo evidence:

atcacagcagggtcgttttagtcagttatccggcgggtgctcgctcctatatgacggggattggtcagttg  
atgagtgaagaggaactgctcgctcgctgctggtttattatcacgatggttaacacaaggggata

Peptide evidence:

ASNAHVADTFR  
ILPSLASLSISSR

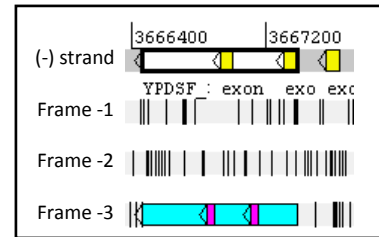

Current sequence (peptide evidence in red): 306aa

MSEEELLARVAWFYYHDGLTQGDIGELLGLARLKVSRLLEKGRQSGVIRVQINSRYEGCLELENTLQQHFGLKHIR**ILPSLASLSISSR**LIGIAAHLMLIQPQQLLAVGFGETTMCALQHLSGFASQQVRLVTLSSGGVGSYMTGIGQLDAACQVSIIPAPLR**ASNAHVADTFRQENSVR**RDVMLAACAAADIAVVGIGSVNQKKEATILRSGYISEGEQLMFSRKGAVGDILGYFIQADGALVPMQIHQELIGISLADLTTIPTVIGVAGGVEKADVIVAALRGRYVNALVTDEVTARAIINLL

Strain: *Y. pseudotuberculosis* PB1/+  
Gene: YPTS\_0577

Classification: DeoR family transcriptional regulator  
Boundaries of gene: 635362..636357

Oligo evidence:

atgagtgaagaggaactgctcgctcgctgctggtttattatcacgatggttaacacaaggggata

Peptide evidence:

ASSAHVADTFR  
ASSAHVADTFRQENSVR  
ILPSLASLSISSR  
SGYISEGEQLMFSR

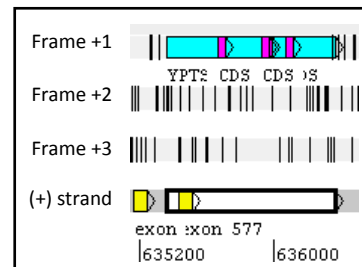

Current sequence (peptide evidence in red): 331aa

MIKEKPAVKEKPLSSNDEYKYPGNSMSEEELLARVAWFYYHDGLTQGDIGELLGLARLKVSRLLEKGRQSGVIRVQINSRYEGCLELENTLQQHFGLKHIR**ILPSLASLSISSR**LIGIAAHLMLIQPQQLLAVGFGETTMCALQHLSGFASQQVRLVTLSSGGVGSYMTGIGQLDAACQVSIIPAPLR**ASSAHVADTFRQENSVR**RDVMLAACAAADIAVVGIGSVNQKKEATILR**SGYISEGEQLMFSR**RKGAVGDILGYFIQADGALVPMQIHQELIGISLADLTTIPTVIGVAGGVEKADVIVAALRGRYVNALVTDEVTARAIINLL

# Error 9

Strain: Y. pestis CO92  
Gene: YPO0437

Classification: expressed pseudogene (deoA)  
Boundaries of gene: Frame+3: 458100:458630  
Frame+2: 458633..459511

Oligo evidence:

tattttccggatgataatgcttccgcaaaattattatgttggtggtgattatcgccaaaccagct  
ggcggcagaggttgctgctgcccacaccttagggaataacacgccagaagaacgccagtgattat

Peptide evidence:

DITATVDSIPLITASILAK  
YDSYLPVATLSKPVFAEQGTGIITAMDTR

Proposed sequence (peptide evidence in red):

Current annotation underlined

Frame+3: 177aa

MHSRLKACCV AISESACGR LSSHIPVKQGDALFLAQEIIRKKRDGQPLSEEEIRFFINGIRDNVVSEGQIAALAMTIYFHDMSMPERVALTMAMRDSGTVLNWKS LNLNGPLVDKHSTGGVG  
DVTSLMLGPMVAACGGYVPMISGRGLGHTGGTLDKLEAIPGDFIFPDDNAFRKI

Frame+2: 292aa

VGVAIIQTSSLAPADKRFYATR **DITATVDSIPLITASILAK** KLAEGLDALVMDVKVSGAFMPTYLSADLAQAI VGVANGAGCKTTALLTDMNQVLASSAGNGVEVREAVRFLTGEYRNPR L  
LEVTMALCVEMLLSGGLAHDEADARAKLQAVLDNGKAAEVFGRMVAAQKGPADFVER **YDSYLPVATLSKPVFAEQGTGIITAMDTR** ALGMAVVALGGRRRATDPIDYSVGLTEMARLGT R  
VDGQQPLAVIHANNEDDWQAAEVVRAAITLGNNTPEETPVYRRITE

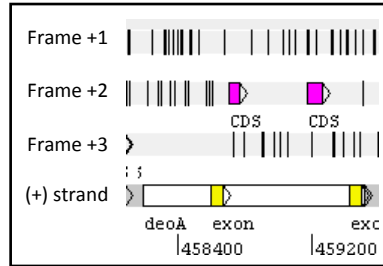

Strain: Y. pestis pestoides F  
Gene: YPDSF\_3196

Classification: annotated as deoA  
Boundaries of gene: complement (3639439..3640854)

Oligo evidence:

ggcggcagaggttgctgctgcccacaccttagggaataacacgccagaagaacgccagtgattat  
tattttccggatgataatgcttccgcaaaattattcagaatgttggtggtgattatcgccaaacc

Peptide evidence:

ALGMAVVALGGGR  
DITATVDSIPLITASILAK  
YDSYLPVATLSKPVFAEQGTGIITAMDTR

Current sequence (peptide evidence in red): 471aa

MHSRLKACCV AISESACGR LSSHIPVKQGDALFLAQEIIRKKRDGQPLSEEEIRFFINGIRDNVVSEGQIAALAMTIYFHDMSMPERVALTMAMRDSGTVLNWKS LNLNGPLVDKHSTGGVG  
DVTSLMLGPMVAACGGYVPMISGRGLGHTGGTLDKLEAIPGDFIFPDDNAFRKI QNVGVAIIQTSSLAPADKRFYATR **DITATVDSIPLITASILAK** KLAEGLDALVMDVKVSGAFMPTYSL  
SADLAQAI VGVANGAGCKTTALLTDMNQVLASSAGNGVEVREAVRFLTGEYRNPR LLEVTMALCVEMLLSGGLAHDEADARAKLQAVLDNGKAAEVFGRMVAAQKGPADFVER **YDSYLP**  
**VATLSKPVFAEQGTGIITAMDTR** ALGMAVVALGGRRRATDPIDYSVGLTEMARLGT RVDGQQPLAVIHANNEDDWQAAEVVRAAITLGNNTPEETPVYRRITE

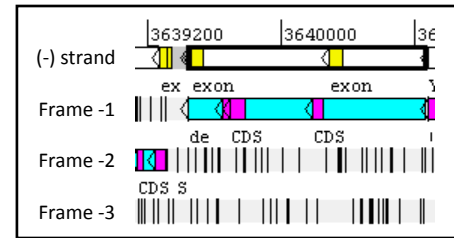

Strain: Y. pseudotuberculosis PB1/+  
Gene: YPTS\_0604

Classification: annotated as deoA  
Boundaries of gene: 667792..669207

Oligo evidence:

tattttccggatgataatgcttccgcaaaattattcagaatgttggtggtgattatcgccaaacc  
ataagctttttacgcgaccgcgatattcggcaacagtgattctattccattgattacgcctctat

Peptide evidence:

DITATVDSIPLITASILAK  
KLAEGLDALVMDVK

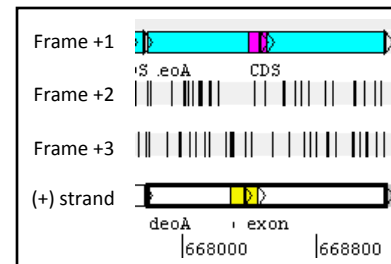

Current sequence (peptide evidence in red): 471aa

MHCRLKACRVAISACGR LSSHIVKQGDALFLAQEIIRKKRDGQPLSEEEIRFFINGIRDNVVSEGQIAALAMTIYFHDMSMPERVALTMAMRDSGTVLNWKS LNLNGPLVDKHSTGGVG  
DVTSLMLGPMVAACGGYVPMISGRGLGHTGGTLDKLEAIPGDFIFPDDNAFRKI QNVGVAIIQTSSLAPADKRFYATR **DITATVDSIPLITASILAK** KLAEGLDALVMDVKVSGAFMPTYSL  
SADLAQAI VGVANGAGCKTTALLTDMNQVLASSAGNGVEVREAVRFLTGEYRNPR LLEVTMALCVEMLLSGGLAHDEADARAKLQAVLDNGKAAEVFGRMVAAQKGPVDFVER YDSYLP  
VATLSKPVFAEQGTGIITAMDTRALGMAVVALGGRRRATDPIDYSVGLTEMARLGT RVDGQQPLAVIHANNEDDWQAAEVVRAAITLGNNTPEETPVYRRITE

# Error 10

Strain: *Y. pestis* CO92  
Gene: YPO0446

Classification: expressed pseudogene  
Boundaries of gene: Frame-1: complement (469162..469731)  
Frame-2: complement (468068..469165)

Oligo evidence:  
gccaccacatcatcgattacaagatgagggaaggtagaattctcgagggaactttactgaatac  
gatacgggtcaactggcgtcggtgatcagttccgtgacaacatggatgacagcaaaacggttgggaag  
aaaccagacatgctgctgctggacgaaccaaccacttggatcagaatctgctgctgctgagcgtc

Peptide evidence:

|                       |                        |                                  |
|-----------------------|------------------------|----------------------------------|
| DEVYALYADPDADFDK      | HDYEGTVVAITHDR         | SIEKELEWVR                       |
| EQGELEAIQSHDGHNLNQLER | IDDLTFALPK             | TLGAEALEPHR                      |
| ESVEEAVGEVVKR         | IGNFELPSR              | TWVEEVSGGQDIMK                   |
| LDEVYALYADPDADFDK     | KSIEKELEWVR            | YFLDNVAGWILELDR                  |
| LDEVYALYADPDADFDKLAKE | LLIDDLTFALPK           | YFLDNVAGWILELDRGEGIPWEGNYSSWLEQK |
| NISLSFFPGA            | LLQVGGNMLLDEPTNLDIETLR |                                  |
| FEELNSVEYQKR          | MLLDEPTNLDIETLR        |                                  |
| FLHDYEGTVVAITHDR      | NETSELFIPIPGPR         |                                  |
| GAIVGIIPNGAGK         | RNETSELFIPIPGPR        |                                  |
| GEGIPWEGNYSSWLEQK     | RTLGAEALEPHR           |                                  |

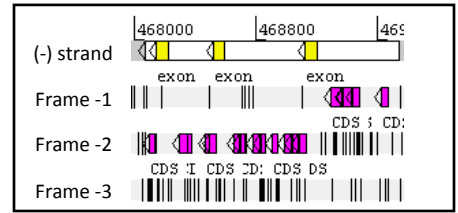

Proposed sequence (peptide evidence in red):

Frame-1: 190aa

MAQYVYTMHRVGKVVPPKRHLIK**NISLSFFPGA**KIGVLGNSGKSTLLRIMAGLDTEIEGEARPLGKIGYLPQEPKLNLEQTVR**ESVEEAVGEVVKRALTR**LDEVYALYADPDADFDKLAKE**EQGELEAIQSHDGHNLNQLER**AADALRPPWDAKIANLSGGERRRVAICRLLLEKPDMLLDEPT

Frame-2: 365aa

NHLDAESVAVLER**FLHDYEGTVVAITHDR**YFLDNVAGWILELDR**GEGIPWEGNYSSWLEQK**NARLAQEAASAEARR**KSIEKELEWVR**QNPKRQAKGKARLAR**FEELNSVEYQKR**NETSELFIPIPGPR**LGDKVLEVEHLSKSYGDR**LLIDDLTFALPK**GAIVGIIPNGAGK**STLFRMLSGQEQPDSGTISLGDVQLASVDQFRDNMDDSK**TWVEEVSGGQDIMK**IGNFELPSR**AYVGRFNF**KGVDDQKRIKIGELSGGERGRIHLAK**LLQVGGNMLLDEPTNLDIETLR**ALLENALLEFPGCAMVISHDRWFLDRIATHIIDYQDEGKVEFFEGNFTYEYEWK**RRTLGAEALEPHR**IKYKMTK

Strain: *Y. pestis* pestoides F  
Gene: YPDSF\_3187

Classification: putative ABC transporter ATP-binding protein  
Boundaries of gene: 3629306..3630973

Oligo evidence:  
actctggaaaaaccagacatgctgctgctggacgaaccaaccaaccacttggatcagaatctgtggcc  
gatacgggtgcaactggcgtcggtgatcagttccgtgacaacatggatgacagcaaaacggttgggaag  
gccaccacatcatcgattacaagatgagggaaggtagaattctcgagggaactttactgaatac

Peptide evidence:

|                               |                             |                                  |
|-------------------------------|-----------------------------|----------------------------------|
| ALTRLDEVYALYADPDADFDKLAKE     | IGELSGGER                   | MVLGIISYSR                       |
| DEVYALYADPDADFDK              | IGNFELPSR                   | NETSELFIPIPGPR                   |
| DNVAGWILELDR                  | IGVLGNSGK                   | NISLSFFPGA                       |
| DNVAGWILELDRGEGIPWEGNYSSWLEQK | IGYLPQEPK                   | RNETSELFIPIPGPR                  |
| EQGELEAIQSHDGHNLNQLER         | IMAGLDTEIEGEARPLGKIG        | RTLGAEALEPHR                     |
| ESVEEAVGEVK                   | KSIEKELEWVR                 | SIEKELEWVR                       |
| ESVEEAVGEVVKR                 | LAQEAASAEAR                 | TLGAEALEPHR                      |
| FEELNSVEYQKR                  | LDEVYALYADPDADFDK           | TWVEEVSGGQDIMK                   |
| FEELNSVEYQKR                  | LDEVYALYADPDADFDKLAKE       | VLEVEHLSK                        |
| FLHDYEGTVVAITHDR              | LGDKVLEVEHLSK               | YFLDNVAGWILELDR                  |
| GAIVGIIPNGAGK                 | LHDYEGTVVAITHDR             | YFLDNVAGWILELDRGEGIPWEGNYSSWLEQK |
| GEGIPWEGNYSSWLEQK             | LLIDDLTFALPK                |                                  |
| HDYEGTVVAITHDR                | MLLEKPDMLLDEPTNHLDAESVAVLER |                                  |
| IANLSGGER                     | LLQVGGNMLLDEPTNLDIETLR      |                                  |
| IDDLTFALPK                    | MLSGQEQPDSGTISLGDVQLASVDQFR |                                  |

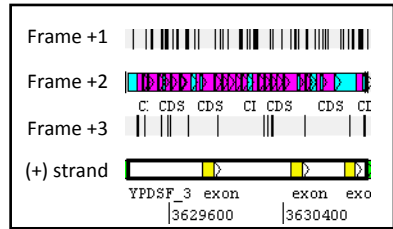

Current sequence (peptide evidence in red): 555aa

VAQYVYTMHRVGKVVPPKRHLIK**NISLSFFPGA**KIGVLGNSGKSTLLR**IMAGLDTEIEGEARPLGKIGYLPQEPKLNLEQTVRESVEEAVGEVVKRALTR**LDEVYALYADPDADFDKLAKE**EQGELEAIQSHDGHNLNQLER**AADALRPPWDAKIANLSGGERRRVAICR**LLLEKPDMLLDEPTNHLDAESVAVLER**FLHDYEGTVVAITHDR**YFLDNVAGWILELDRGEGIPWEGNYSSWLEQK**NARLAQEAASAEARR**KSIEKELEWVR**QNPKRQAKGKARLAR**FEELNSVEYQKR**NETSELFIPIPGPR**LGDKVLEVEHLSKSYGDR**LLIDDLTFALPK**GAIVGIIPNGAGK**STLFRMLSGQEQPDSGTISLGDVQLASVDQFRDNMDDSK**TWVEEVSGGQDIMK**IGNFELPSR**AYVGRFNF**KGVDDQKRI**IGELSGGER**GRIHLAK**LLQVGGNMLLDEPTNLDIETLR**ALLENALLEFPGCAMVISHDRWFLDRIATHIIDYQDEGKVEFFEGNFTYEYEWK**RRTLGAEALEPHR**IKYKMTK

Strain: *Y. pseudotuberculosis* PB1/+  
Gene: YPTS\_0612

Classification: putative ABC transporter ATP-binding protein  
Boundaries of gene: complement (677816..679483)

Oligo evidence:  
attacaagatgagggaaggtagaattctcgagggaacttactgaatacgaagagtgaagaaacg  
gccaccacatcatcgattacaagatgagggaaggtagaattctcgagggaacttactgaatac  
gatacgggtcaactggcgtcggtgatcagttccgtgacaacatggatgacagcaaaacggttgggaag  
actctggaaaaaccagacatgctgctgctggacgaaccaaccaaccacttggatcagaatctgtggcc

Peptide evidence:

|                       |                             |                                  |
|-----------------------|-----------------------------|----------------------------------|
| DEVYALYADPDADFDK      | KSIEKELEWVR                 | SIEKELEWVR                       |
| EQGELEAIQSHDGHNLNQLER | LAQEAASAEAR                 | TLGAEALEPHR                      |
| ESVEEAVGEVK           | LDEVYALYADPDADFDK           | TWVEEVSGGQDIMK                   |
| ESVEEAVGEVVKR         | LDEVYALYADPDADFDKLAKE       | VLEVEHLSK                        |
| FEELNSVEYQKR          | LLIDDLTFALPK                | YFLDNVAGWILELDR                  |
| FEELNSVEYQKR          | MLLEKPDMLLDEPTNHLDAESVAVLER | YFLDNVAGWILELDRGEGIPWEGNYSSWLEQK |
| FLHDYEGTVVAITHDR      | LLQVGGNMLLDEPTNLDIETLR      |                                  |
| GAIVGIIPNGAGK         | MLSGQEQPDSGTISLGDVQLASVDQFR |                                  |
| GEGIPWEGNYSSWLEQK     | NETSELFIPIPGPR              |                                  |
| HDYEGTVVAITHDR        | NISLSFFPGA                  |                                  |
| IGELSGGER             | RIGELSGGER                  |                                  |
| IGNFELPSR             | RNETSELFIPIPGPR             |                                  |
| IGYLPQEPK             | RTLGAEALEPHR                |                                  |

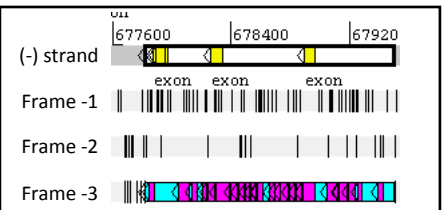

Current sequence (peptide evidence in red): 555aa

VAQYVYTMHRVGKVVPPKRHLIK**NISLSFFPGA**KIGVLGNSGKSTLLRIMAGLDTEIEGEARPLGKIGYLPQEPKLNLEQTVRESVEEAVGEVVKRALTR**LDEVYALYADPDADFDKLAKE**EQGELEAIQSHDGHNLNQLER**AADALRPPWDAKIANLSGGERRRVAICR**LLLEKPDMLLDEPTNHLDAESVAVLER**FLHDYEGTVVAITHDR**YFLDNVAGWILELDR**GEGIPWEGNYSSWLEQK**NARLAQEAASAEARR**KSIEKELEWVR**QNPKRQAKGKARLAR**FEELNSVEYQKR**NETSELFIPIPGPR**LGDKVLEVEHLSKSYGDR**LLIDDLTFALPK**GAIVGIIPNGAGK**STLFRMLSGQEQPDSGTISLGDVQLASVDQFRDNMDDSK**TWVEEVSGGQDIMK**IGNFELPSR**AYVGRFNF**KGVDDQKRI**RIGELSGGER**GRIHLAK**LLQVGGNMLLDEPTNLDIETLR**ALLENALLEFPGCAMVISHDRWFLDRIATHIIDYQDEGKVEFFEGNFTYEYEWK**RRTLGAEALEPHR**IKYKMTK

# Error 11

Strain: *Y. pestis* CO92  
Gene: YPO0674

Classification: expressed pseudogene  
Boundaries of gene: Frame+3: 735996..737525  
Frame+2: 737525..738337

Oligo evidence:

ttttactgcttcatatgaaaaagtgaaggcggacaagtggttatgccatacctcgggattttgca  
actgtttgatacttactcgaacaggcggtaagagcagattttgatcccttatttcatctccgcacat

Peptide evidence:

QRQPSNRAPAASAGKK

Proposed sequence (peptide evidence in red):

Frame3: 510aa

MSISLIQPERDLFSYQPYWAECYGTAPFLPMSREEMDILGWDS CDIIVITGDAYVDHPSFGMAIVGRMLEAQGFRVGGIAQPDWTKHDFMRLGEPNLFVGVTAGNMDSMINRYTADRKL  
RHDDAYTPDNQSGKRPRDRATLVYSQRCKEAYSHVPVLLGGIEASLRRIAHYDYWSDTVRRSVIVDAKADMLVYNGERPLVEVAHRLAAGEKITDIQDVRNTVVMRKTPLPGWSGVDSTRL  
DKPGRIEAI PNYPYGEDLP CATDDISIPEAKPITVRAAKPKPWEKTYVLLPSYEKVKADKVL YAHTSRILHHTETNPGCARALMQKHGDRYIWINPPAIPLSTEEMDSV FALPYQRVPHPSYKSPIP  
AYDMIRFSINIMRGYGGCSFCSITEHEGRIIQRSSEDSIIEIEIIRDKVPFGFTGIISDLGGPTANMYMLRCQSPRAEQTCRRASCVYPEICPHMDTNHQPTISLYRRARDLKGIKKILIASGVRYD  
LAVEDPRYIKELASH

Frame2: 271aa

HVGGYLKIAPEHTEEGPLSKMMKPGMGSYQRFKELFDTSYKQAGKEQYLIPYFISAHPGTEDKDMVNLALWLKKNRFRDLQVQNFYPSPLANSTTMYTGNKPLAKVDYKSEEVVVPKGD  
RQRRLHKALLRYHDPANWPMRLSALEDMLQLHLIGARRECLVPAPTLLEEQRARRALRHHTPALT KHTSITRQRQPSNRAPAASAGKKAPT VANGTSSAHSTSANQSTSANQSTAAHSTLA  
TKKSAGKTGVNKA AVNKPSAGSRGKNRQK

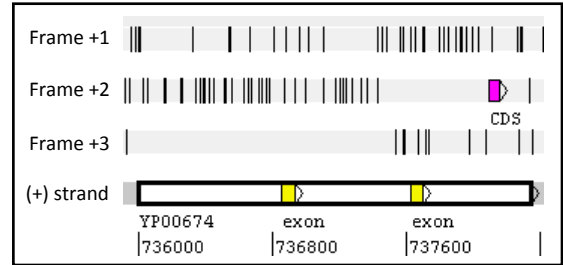

Strain: *Y. pestis* pestoides F  
Gene: YPDSF\_0458/YPDSF\_0459

Classification: Both genes annotated as hypothetical proteins  
Boundaries of gene: YPDSF\_0458 Frame+1: 517558..519087  
YPDSF\_0459 Frame+3: 519087..519902

Oligo evidence:

ttttactgcttcatatgaaaaagtgaaggcggacaagtggttatgccatacctcgggattttgca  
actgtttgatacttactcgaacaggcggtaagagcagattttgatcccttatttcatctccgcacat

Peptide evidence:

KILIASGVR

Current sequence (peptide evidence in red):

Frame+1: 510aa (YPDSF\_0458)

MSISLIQPERDLFSYQPYWAECYGTAPFLPMSREEMDILGWDS CDIIVITGDAYVDHPSFGMAIVGRMLEAQGFRVGGIAQPDWTKHDFMRLGEPNLFVGVTAGNMDSMINRYTADRKL  
RHDDAYTPDNQSGKRPRDRATLVYSQRCKEAYSHVPVLLGGIEASLRRIAHYDYWSDTVRRSVIVDAKADMLVYNGERPLVEVAHRLAAGEKITDIQDVRNTVVMRKTPLPGWSGVDSTRL  
DKPGRIEAI PNYPYGEDLP CATDDISIPEAKPITVRAAKPKPWEKTYVLLPSYEKVKADKVL YAHTSRILHHTETNPGCARALMQKHGDRYIWINPPAIPLSTEEMDSV FALPYQRVPHPSYKSPIP  
AYDMIRFSINIMRGYGGCSFCSITEHEGRIIQRSSEDSIIEIEIIRDKVPFGFTGIISDLGGPTANMYMLRCQSPRAEQTCRRASCVYPEICPHMDTNHQPTISLYRRARDLKGIKKILIASGVRYD  
LAVEDPRYIKELASH

Frame+3: 271aa (YPDSF\_0459)

HVGGYLKIAPEHTEEGPLSKMMKPGMGSYQRFKELFDTSYKQAGKEQYLIPYFISAHPGTEDKDMVNLALWLKKNRFRDLQVQNFYPSPLANSTTMYTGNKPLAKVDYKSEEVVVPKGD  
RQRRLHKALLRYHDPANWPMRLSALEDMLQLHLIGARRECLVPAPTLLEEQRARRALRHHTPALT KHTSITRQRQPSNRAPAASAGKKAPT VANGTSSAHSTSANQSTSANQSTAAHSTLA  
TKKSAGKTGVNKA AVNKPSAGSRGKNRQK

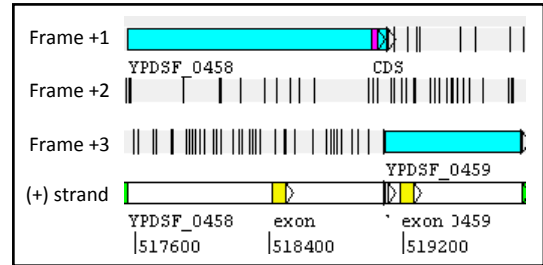

Strain: *Y. pseudotuberculosis* PB1/+  
Gene: YPTS\_3529

Classification: annotated as hypothetical protein  
Boundaries of gene: complement (3934430..3936793)

Oligo evidence:

actgtttgatacttactcgaacaggcggtaagagcagattttgatcccttatttcatctccgcacat

Peptide evidence:

NA

Current sequence (peptide evidence in red): 787aa

MSISLIQPERDLFSYQPYWAECYGTAPFLPMSREEMDILGWDS CDIIVITGDAYVDHPSFGMAIVGRMLEAQGFRVGGIAQPDWTKHDFMRLGEPNLFVGVTAGNMDSMINRYTADRKL  
RHDDAYTPDNQSGKRPRDRATLVYSQRCKEAYSHVPVLLGGIEASLRRIAHYDYWSDTVRRSVIVDAKADMLVYNGERPLVEVAHRLAAGEKITDIQDVRNTVVMRKTPLPGWSGVDSTRL  
DKPGRIEAI PNYPYGEDLP CATDDISIPEAKPITVRAAKPKPWEKTYVLLPSYEKVKADKVL YAHTSRILHHTETNPGCARALMQKHGDRYIWINPPAIPLSTEEMDSV FALPYQRVPHPSYKSPIP  
AYDMIRFSINIMRGYGGCSFCSITEHEGRIIQRSSEDSIIEIEIIRDKVPFGFTGIISDLGGPTANMYMLRCQSPRAEQTCRRASCVYPEICPHMDTNHQPTISLYRRARDLKGIKKILIASGVRYD  
LAVEDPRYIKELASHHVGGYLKIAPEHTEEGPLSKMMKPGMGSYQRFKELFDTSYKQAGKEQYLIPYFISAHPGTEDKDMVNLALWLKKNRFRDLQVQNFYPSPLANSTTMYTGNKPLAKV  
DYKSEEVVVPKGDQRRLHKALLRYHDPANWPMRLSALEDMLQLHLIGARRECLVPAPTLLEEQRARRALRHHTPALT KHTSITRQRQPSNRAPAASAGKKAPT VANGTSSAHSTSANQST  
SANQSTSANQSTAAHSMLATKKSAGKTGVNKA AVNKPSAGSRGKNRQK

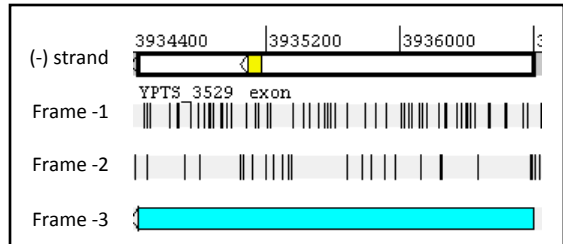

# Error 12

Strain: *Y. pestis* CO92  
Gene: YPO1195

Classification: expressed pseudogene  
Boundaries of gene: 1345498..1346430

## Oligo evidence:

ggcagataacgctcggtaggctctaaaattgataccgaaggtccttgctgggcaatattattgtgcag  
atcatcctggaagtactctgaaagctcaccgaacatcccgcttgcttaacccgtattccgccac

## Peptide evidence:

DLATANLNR  
IDTEGSLLGNIIQVLEANGIK  
IFAVAAIMLSASSGISHAAD  
LVWLSPAPANNTWTIAVR  
VGSKIDTEGSLLGNIIQVLEANGIK  
AHPNIPALLNPVFATLDGPTLQK

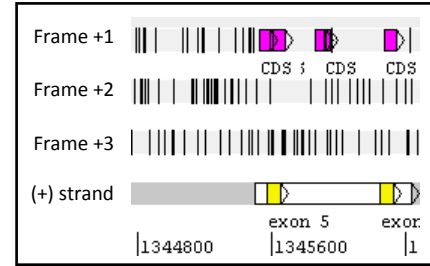

## Proposed sequence (peptide evidence in red): 310aa

MALFLTRSRI**FAVAAIMLSASSGISHAAD**NVR**VGSKIDTEGSLLGNIIQVLEANGIK**TTNKSQLGATKVVVRGAIAGEIDIYPEYTGNGAFFFSDEQDPAWKSAKAGYEKVKALDYENK**LVWL**  
**SPAPANNTWTIAVR**KDLATANLNR**LDL**LGGK**WINGGGQF**KLAASAEFIERPDALPAFQQAYGFTLNQDQLSLAGGDTAVTIKAAAEQISGVNAAMAYGTDGPVAALGLQTL**EDTKGVQPI**  
**YAPAPIIREVTLK**AHPNIPALLNPVFATLDGPTLQKLNARIAVEGQDAK**VAANYL**KDNGFIK**N**

Strain: *Y. pestis* pestoides F  
Gene: YPDSF\_2500

Classification: annotated as hypothetical protein  
Boundaries of gene: complement (2847097..2848029)

## Oligo evidence:

atcatcctggaagtactctgaaagctcaccgaacatcccgcttgcttaacccgtattccgccac  
ggcagataacgctcggtaggctctaaaattgataccgaaggtccttgctgggcaatattattgtgcag

## Peptide evidence:

AAAEQISGVNAAMAYGTDGPVAALGLQTL**EDTK**  
AHPNIPALLNPVFATLDGPTLQK  
DLATANLNR  
GVQPIYAPAPIIR  
IDTEGSLLGNIIQVLEANGIK  
LVWLSPAPANNTWTIAVR  
VGSKIDTEGSLLGNIIQVLEANGIK

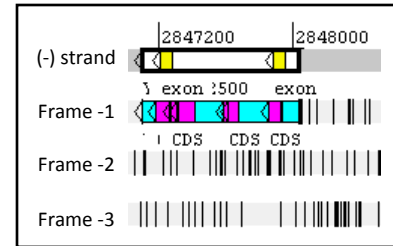

## Current sequence (peptide evidence in red): 310aa

MALFLTRSRI**FAVAAIMLSASSGISHAAD**NVR**VGSKIDTEGSLLGNIIQVLEANGIK**TTNKSQLGATKVVVRGAIAGEIDIYPEYTGNGAFFFSDEQDPAWKSAKAGYEKVKALDYENK**LVWL**  
**SPAPANNTWTIAVR**KDLATANLNR**LDL**LGGK**WINGGGQF**KLAASAEFIERPDALPAFQQAYGFTLNQDQLSLAGGDTAVTIKAAAEQISGVNAAMAYGTDGPVAALGLQTL**EDTKGVQPI**  
**YAPAPIIREVTLK**AHPNIPALLNPVFATLDGPTLQKLNARIAVEGQDAK**VAANYL**KDNGFIK**N**

Strain: *Y. pseudotuberculosis* PB1/+  
Gene: YPTS\_1324

Classification: substrate-binding region of ABC-type glycine betaine transport system  
Boundaries of gene: 1471848..1472780

## Oligo evidence:

ggcagataacgctcggtaggctctaaaattgataccgaaggtccttgctgggcaatattattgtgcag  
atcatcctggaagtactctgaaagctcaccgaacatcccgcttgcttaacccgtattccgccac

## Peptide evidence:

AHPNIPALLNPVFATLDGPTLQK  
DLATANLNR  
GVQPIYAPAPIIR  
IDTEGSLLGNIIQVLEANGIK  
IFAVAAIMLSASSGISHAAD  
KDLATANLNR  
KVAANYLK  
LVWLSPAPANNTWTIAVR

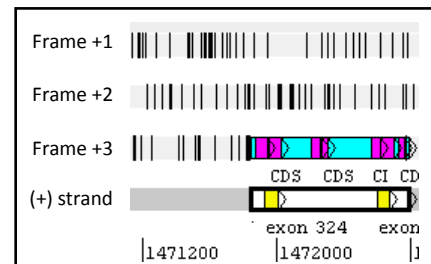

## Current sequence (peptide evidence in red): 310aa

MALFLTRSRI**FAVAAIMLSASSGISHAAD**NVR**VGSKIDTEGSLLGNIIQVLEANGIK**TTNKSQLGATKVVVRGAIAGEIDIYPEYTGNGAFFFSDEQDPAWKSAKAGYEKVKALDYENK**LVWL**  
**SPAPANNTWTIAVR**KDLATANLNR**LDL**LGGK**WINGGGQF**KLAASAEFIERPDALPAFQQAYGFTLNQDQLSLAGGDTAVTIKAAAEQISGVNAAMAYGTDGPVAALGLQTL**EDTKGVQPI**  
**YAPAPIIREVTLK**AHPNIPALLNPVFATLDGPTLQKLNARIAVEGQDAK**VAANYL**KDNGFIK**N**

# Error 13

Strain: *Y. pestis* CO92  
Gene: YPO1219

Classification: expressed pseudogene  
Boundaries of gene: Frame-2: complement (1377956..1379881)  
Frame-3: complement (1377192..1377956)

Oligo evidence:

agcattggccgacagatacaatcatggttcggggctgacatTTTTTatgtaaccaattatgtaaaaaat  
aaggttgagtacattacagaagatgataaaacctctatgagaggcaactaaaaaccagtgactattatt

Peptide evidence:

HALTNIANGLQQR  
LRPDVYIEKPR

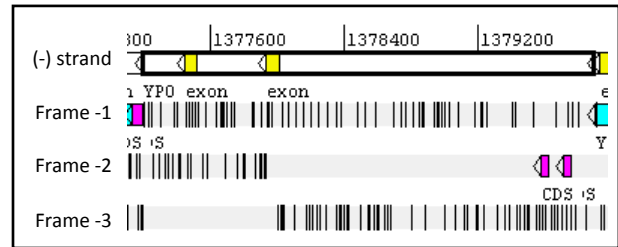

Proposed sequence (peptide evidence in red):

Frame-2: 642aa

MQNNSSTHSAANITRYFWLFIIVLLMTVGLYAYNYTNAYLTKK**HALTNIANGLQQR**IDDYRYHTYQIYDLVNNPIKASEPPPVQETRL**LRPDVYIEKPR**RKTDIAIFGNHEPATLTMALQISD  
YLDNLWGPQNDTYSMYLNGQDNSLLITTTQALKEVTSRFKESYLTAFAESRRAEMLQVNTLDERESFSLRKLRFQNAFYFTLRITFNRPGLHATVIAFDLPINDLIPPNMARSNFLQDPK  
VPLNEGATPEDIAATSVSLNGSWVEFSAPLANVTLKIIYRVPVSHLIDLLINNFWLILANIVLLALTLAAFYVRHQYGRPSADVTGQLEAQRLLSQEIITNLPQGLLIYDFSNSTVIASNKIAENLLP  
HLNLQKIATMAEQHHGVIQGTVNNEVEIHMFRSQSPETYLFLNDQDKEVLVNNKQQARREYDKNLQARKMLHNLGIELGQPVHHSLSQLVRTLQDITDLQQQHDIKTKLVEQSATILE  
LIDNITLLTKLETQDWQTEQQVFSLSLTLIDNLLDLLPSINRKGLENLNFHVSVDQIYLGDEKVLRLKLSLLNYSIVTTAYGKITLNVDPHEPGHPEQLVIQIMDTGAGISDDEIGNLNYPFLSQALA  
DRYNHGSGLTFF

Frame-3: 255aa

LCNLQCKLNGQLEIRSKVDIGTRYIRTLTIAVKNEQDQTEKLLDGVTVLLDITSEEVRSIITILLSNFGANCILTDERLPGRDYDVTITDNPQHYDNYTLAADAETGFHQLQNNYIRANYNLSSA  
VIDSILLIERRILSEQSQKVEYITEDDINLYERQLKTSDYSLFVETVPVDLKKLYTELQSQDLSLQTVHRLKGVFAMNLNLVGLKQLCETLEQHIADGDRLKIENSISQIDFFITRLLQEGNP

Strain: *Y. pestis* pestoides F

Classification: hypothetical protein

Gene: YPDSF\_2473

Boundaries of gene: YPDSF\_2473: 2812245..2814197  
YPDSF\_2474: 2814365..2814937

Oligo evidence:

agcattggccgacagatacaatcatggttcggggctgacatTTTTTatgtaaccaattatgtaaaaaat  
aaggttgagtacattacagaagatgataaaacctctatgagaggcaactaaaaaccagtgactattatt

Peptide evidence:

HALTNIANGLQQR  
LVEQSATILELIDNITLLTK  
LRPDVYIEKPR  
TLQDITDLQQQHDIK  
ANYNLSSAVIDSILLIER

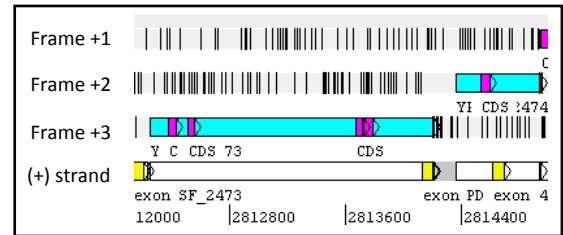

Current sequence (peptide evidence in red): YPDSF\_2473: 650aa

MQNNSSTHSAANITRYFWLFIIVLLMTVGLYAYNYTNAYLTKK**HALTNIANGLQQR**IDDYRYHTYQIYDLVNNPIKASEPPPVQETRL**LRPDVYIEKPR**RKTDIAIFGNHEPATLTMALQISD  
YLDNLWGPQNDTYSMYLNGQDNSLLITTTQALKEVTSRFKESYLTAFAESRRAEMLQVNTLDERESFSLRKLRFQNAFYFTLRITFNRPGLHATVIAFDLPINDLIPPNMARSNFLQDPK  
VPLNEGATPEDIAATSVSLNGSWVEFSAPLANVTLKIIYRVPVSHLIDLLINNFWLILANIVLLALTLAAFYVRHQYGRPSADVTGQLEAQRLLSQEIITNLPQGLLIYDFSNSTVIASNKIAENLLP  
HLNLQKIATMAEQHHGVIQGTVNNEVEIHMFRSQSPETYLFLNDQDKEVLVNNKQQARREYDKNLQARKMLHNLGIELGQPVHHSLSQLVRTLQDITDLQQQHDIKTKLVEQSATILE  
**LIDNITLLTKLETQDWQTEQQVFSLSLTLIDNLLDLLPSINRKGLENLNFHVSVDQIYLGDEKVLRLKLSLLNYSIVTTAYGKITLNVDPHEPGHPEQLVIQIMDTGAGISDDEIGNLNYPFLSQALA**  
DRYNHGSGLTFFVYVTVYVKN

YPDSF\_2474: 190 aa

LLNSFGANCILTDERLPGRDYDVTITDNPQHYDNYTLAADAETGFHQLQNNYIR**ANYNLSSAVIDSILLIER**RILSEQSQKVEYITEDDINLYERQLKTSDYSLFVETVPVDLKKLYTELQSQDLSLQTVHRLKGVFAMNLNLVGLKQLCETLEQHIADGDRLKIENSISQIDFFITRLLQEGNP

Strain: *Y. pseudotuberculosis* PB1/+

Classification: phosphotransfer intermediate protein in two-component regulatory system with RcsBC

Gene: YPTS\_1347

Boundaries of gene: complement (1503527..1506220)

Oligo evidence:

aaggttgagtacattacagaagatgataaaacctctatgagaggcaactaaaaaccagtgactattatt

Peptide evidence:

ANYNLSSAVIDSILLIER  
HALTNIANGLQQR  
ILSEQSQK  
LETQDWQTEQQVFSLSLTLIDNLLDLLPSINRK  
LMLHNLGIELGQPVHHSLSQLV  
LRPDVYIEKPR  
LVEQSATILELIDNITLLTK  
REYDKNLQAR

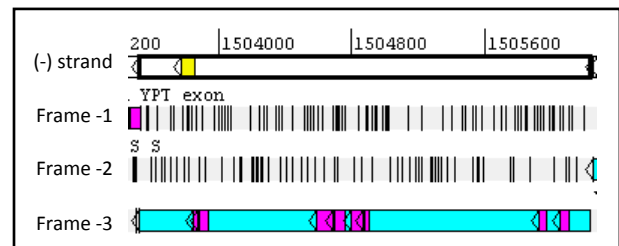

Current sequence (peptide evidence in red): 897aa

MQNNSSTHSAANITRYFWLFIIVLLMTVGLYAYNYTNAYLTKK**HALTNIANGLQQR**IDDYRYHTYQIYDLVNNPIKASEPPPVQETRL**LRPDVYIEKPR**RKTDIAIFGNHEPATLTMALQISD  
YLDNLWGPQNDTYSMYLNGQDNSLLITTTQALKEVTSRFKESYLTAFAESRRAEMLQVNTLDERESFSLRKLRFQNAFYFTLRITFNRPGLHATVIAFDLPINDLIPPNMARSNFLQDPK  
VPLNEGATPEDIAATSVSLNGSWVEFSAPLANVTLKIIYRVPVSHLIDLLINNFWLILANIVLLALTLAAFYVRHQYGRPSADVTGQLEAQRLLSQEIITNLPQGLLIYDFSNSTVIASNKIAENLLP  
HLNLQKIATMAEQHHGVIQGTVNNEVEIHMFRSQSPETYLFLNDQDKEVLVNNKQQAR**REYDKNLQARKLMLHNLGIELGQPVHHSLSQLVRTLQDITDLQQQHDIKTKLVEQSATILE**  
**LIDNITLLTKLETQDWQTEQQVFSLSLTLIDNLLDLLPSINRKGLENLNFHVSVDQIYLGDEKVLRLKLSLLNYSIVTTAYGKITLNVDPHEPGHPEQLVIQIMDTGAGISDDEIGNLNYPFLSQALA**  
DRYNHGSGLTFFLCNLQCKKLNQLEIRSKVDIGTRYIRTLTIAVKNEQDQTEKLLDGVTVLLDITSEEVRSIITILLSNFGANCILTDERLPGRDYDVTITDNPQHYDNYTLAADAETGFHQLQ  
NNYIR**ANYNLSSAVIDSILLIER**RILSEQSQKVEYITEDDINLYERQLKTSDYSLFVETVPVDLKKLYTELQSQDLSLQTVHRLKGVFAMNLNLVGLKQLCETLEQHIADGDRLKIENSISQIDFF  
ITRLLQEGNP

# Error 14

Strain: *Y. pestis* CO92  
Gene: YPO1337

Classification: expressed pseudogene  
Boundaries of gene: region 1: complement (1504641..1505183)  
region 2: complement (1502469..1502774)

Oligo evidence:

tccacttatatccaccaacggcccaaatattgatccaccgttttactcaggattagcttctgctataac  
taaacatcctgaaattcagaccgtgtcttatgactgtcaacgacggatgaaagtgatccacttatatct  
acctaccgccattgaatctatggatgccaataacgaaatcgttgcttggatgatggatctggcaaaag

Peptide evidence:

FAASATYPPFESMDANNEIVGFMDLAK  
KIGMENGTTTHQK  
QVAFTQPYANSAIWIAPK  
SKQVAFTQPYANSAIWIAPK  
ADGTYQAINDK  
DGVFGDTAVVNEWLK  
IDGVFGDTAVVNEWLK

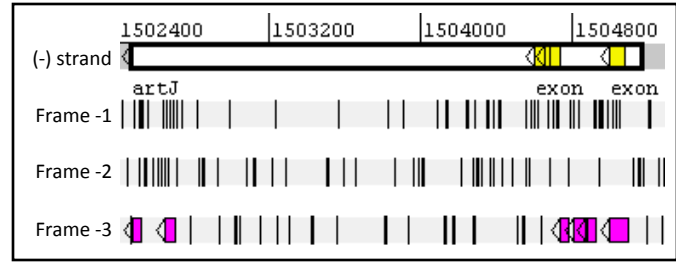

Proposed sequence (peptide evidence in red):

Region 1: 181aa

MKNSDRSLSMKLLLATLLSGMAFSATAAETLRFAASATYPPFESMDANNEIVGFMDLAKALCKQMEANCTFTNQAFDSLIPALFKRYDAVISGMDITPERSKQVAFTQPYANSAIWIAP  
KGKFTFADLKGKIGMENGTTTHQKYLQDKHPEIQTVSYDCQRRMKSDPLISPPTAQY

Region 2: 102aa

MGVDPHYCTVRYNDSYQNAIIDLNKGRIDGVFGDTAVVNEWLKTNPNLASVGEHVTDPQYFGTGLGIIVRPDNIALLTKLNKAIDAVKADGTYQAINDKWFPQ

Strain: *Y. pestis* pestoides F  
Gene: YPDSF\_2359

Classification: hypothetical protein  
Boundaries of gene: 268865..268956

Oligo evidence:

acctaccgccattgaatctatggatgccaataacgaaatcgttgcttggatgatggatctggcaaaag  
ataaacatcctgaaattcagaccgtgtcttatgacagctaccagaatgccatcattgatctgaaaaatgg

Peptide evidence:

ADGTYQAINDK  
FAASATYPPFESMDANNEIVGFMDLAK  
GKFTFADLK  
GKKIGMEN  
IDGVFGDTAVVNEWLK  
KIGMENGTTTHQK  
QVAFTQPYANSAIWIAPK  
RYDAVISGMDITPER  
SKQVAFTQPYANSAIWIAPK  
TNPNLASVGEHVTDPQYFGTGLGIIVRPDNIALLTK  
YLQDKHPEIQTVSYDSYQNAIIDLK

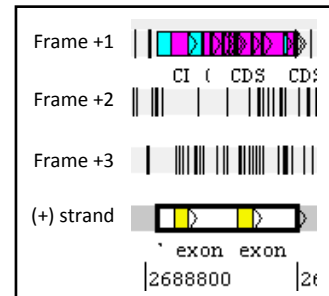

Current sequence (peptide evidence in red): 243aa

MKLLLATLLSGMAFSATAAETLRFAASATYPPFESMDANNEIVGFMDLAKALCKQMEANCTFTNQAFDSLIPALFKRYDAVISGMDITPERSKQVAFTQPYANSAIWIAPKGKFTFADL  
KGKIGMENGTTTHQKYLQDKHPEIQTVSYDSYQNAIIDLNKGRIDGVFGDTAVVNEWLKTNPNLASVGEHVTDPQYFGTGLGIIVRPDNIALLTKLNKAIDAVKADGTYQAINDKWFPQ

Strain: *Y. pseudotuberculosis* PB1/+  
Gene: YPTS\_1464

Classification: cationic amino acid ABC transporter, periplasmic binding protein  
Boundaries of gene: complement (1626984..1627715)

Oligo evidence:

ataaacatcctgaaattcagaccgtgtcttatgacagctaccagaatgccatcattgatctgaaaaatgg  
acctaccgccattgaatctatggatgccaataacgaaatcgttgcttggatgatggatctggcaaaag

Peptide evidence:

ADGTYQAINDK  
ADGTYQAINDKWFPQ  
DGVFGDTAVVNEWLK  
FAASATYPPFESMDANNEIVGFMDLAK  
IDGVFGDTAVVNEWLK  
KIGMENGTTTHQK  
QVAFTQPYANSAIWIAPK  
RYDAVISGMDITPER  
SKQVAFTQPYANSAIWIAPK  
TNPNLASVGEHVTDPQYFGTGLGIIVRPDNIALLTK

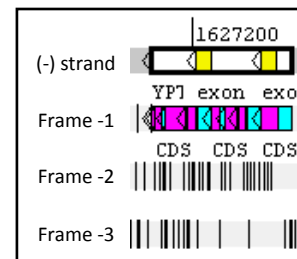

Current sequence (peptide evidence in red): 243aa

MKLLLATLLSGMVFSAATAAETLRFAASATYPPFESMDANNEIVGFMDLAKALCKQMEANCTFTNQAFDSLIPALFKRYDAVISGMDITPERSKQVAFTQPYANSAIWIAPKGKFTFADL  
KGKIGMENGTTTHQKYLQDKHPEIQTVSYDSYQNAIIDLNKGRIDGVFGDTAVVNEWLKTNPNLASVGEHVTDPQYFGTGLGIIVRPDNIALLTKLNKAIDAVKADGTYQAINDKWFPQ

# Error 15

Strain: *Y. pestis* CO92  
Gene: YPO1584

Classification: expressed pseudogene  
Boundaries of gene: complement (1808243..1808536)

Oligo evidence:

tacctgtcttctatggatcaaccacaagaagatgcgttggtgatagaacgctctggcttacgaccgatg  
accgatgtgcacgccaattaataatattagaagctggattgctaaaattgagctcatcagagagcc

Peptide evidence:

LHYLSSMDQPQEDALVDR

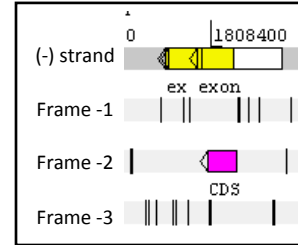

Proposed sequence (peptide evidence in red): 98aa

MDRNNEVIQTHPVVGGWDISTVDVYDAMMIR**LHYLSSMDQPQEDALVDR**TLWLTTDVARQLINILEAGIAKIESSESLSIILCNCHRIKDRSGGHRTR

Strain: *Y. pestis* pestoides F  
Gene: YPDSF\_1861

Classification: annotated as BssS  
Boundaries of gene: 2097596..2097892

Oligo evidence:

tacctgtcttctatggatcaaccacaagaagatgcgttggtgatagaacgctctggcttacgaccgatg  
accgatgtgcacgccaattaataatattagaagctggattgctaaaattgagctcatcagagagcc

Peptide evidence:

QLINILEAGIAK

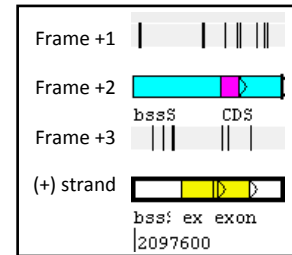

Current sequence (peptide evidence in red): 98aa

MDRNNEVIQTHPVVGGWDISTVDVYDAMMIR**LHYLSSMDQPQEDALVDR**TLWLTTDVAR**QLINILEAGIAK**IESSESLSIILCNCHRIKDRSGGHRTR

Strain: *Y. pseudotuberculosis* PB1/+  
Gene: YPTS\_2572

Classification: annotated as BssS  
Boundaries of gene: 2846646..2846900

Oligo evidence:

tgtagatgtgtacgatgctatgatgatacgtcttcattacgtcttctctatggagcaaccacaagaagat

Peptide evidence:

QLINILEAGIAK

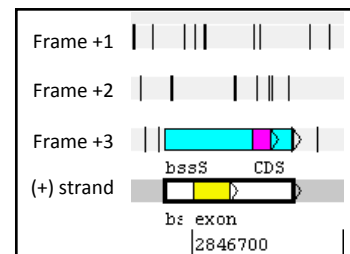

Current sequence (peptide evidence in red): 84aa

MDRNNEVIQTHPVVGGWDISTVDVYDAMMIR**LHYLSSMEQPQEDALVDR**TLWLTTDVAR**QLINILEAGIAK**IESSEYLDMDHRKH



# Error 16

Strain: *Y. pestis* CO92  
Gene: YPO1684

Classification: expressed pseudogene  
Boundaries of gene: Frame+3:1919412..1921514  
Frame+1: 1921498..1922043

Oligo evidence:

ttttatggtgacgattttgtccaaactgctttctcaactctatgtgaacaatgccaatgatcct  
atgtcgaatgtcaccacgacgccaatgcttatacagaccagcctattctgacttaagaagatctga

Peptide evidence:

YSTTDNNTSGTVSVGNAATGETR

Proposed sequence (peptide evidence in red):

Frame+3: 701aa

MKSIQKDCNYLVRFAVSDSFIRDNSFRLLAIFMVTIFVPNTAFSFLYVNNANDPGCYVIADGGFTGVTNSDQNCYTLSSLNINNTGGQLFVGGKGGIAGKPSFIATPWTGTFITAVGTSNVATAYGFVQSNAGAFING  
DTYVKGGLFLNKRKATNLAPATISSTSDAVVGSQLYTVIQDGTTRYFHANSVNPQDSVPAGQDAIIVGATVNVNNGIGIGISSAVVGPSAVGGIAGPNTQATGIASALGAGSQAHSQSLALGAGATASQANSIAL  
GASSVTVVGAESDYSAYGLTAPQTSVGEVGMGTAAQGNRKITGVAAGSADYDVVNVVAQLTAVGDKVEQNTADITSLGGRVTNVEGGMTRITNGGGIKYFHTHSTEPSVAGSDDSVAIGPNAQASGTTSIAMGAGSTA  
QGAQSLALGAGAAASQANSIALGASSVTVVGAESDYSAYGLTAPQTSVGEVGMGTAAQGNRKITGVAAGSADYDVVNVVAQLTAVGDKVQNTADITSLDGRVTNVEGEMASITNGGGVYFHTHSTESDSVAGSDDS  
AIGPNAQASGTASVAGSGKTLASGNNGAVAIGDAASVSAEGSVALGQGSADNNGRAESYTGK**YSTTDNNTSGTVSVGNAATGETR**TVSNVADGREAMDAVNLRQLDGAMA AVGDTVSLGQNGTDGMFQVNNNSG  
QAKPSVTGTDAMAGGGRLRWVWQPQYRDGYGQQDGGGKQHRAGGQLSGGS

Frame+1: 182aa

MRWRGGAGSVASGSHSTAMGTGSKATAANSTALGANSVADRENSVSVGSVGNRQLTNIIVGTVQGTDAVNLDQLNHSMNSVNTDANAYTDQRYALKEDLKKQDSTLSAGIAGAMAMASLTQPYPGASMATIG  
AASRYGQSALSUVGSSISDSGRWVSKLQASNTQDGMGVGVGVGYQW

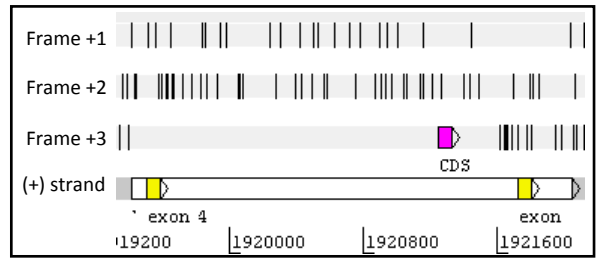

Strain: *Y. pestis* pestoides F  
Gene: YPDSF\_1763 / YPDSF\_1764

Classification: YPDSF\_1763 annotated as surface protein  
YPDSF\_1764 annotated as hypothetical protein  
Boundaries of gene: YPDSF\_1764 Frame-2: complement (1988312..1990522)  
YPDSF\_1763 Frame-1: complement (1987891..1988436)

Oligo evidence:

ttttatggtgacgattttgtccaaactgctttctcaactctatgtgaacaatgccaatgatcct  
atgtcgaatgtcaccacgacgccaatgcttatacagaccagcctattctgacttaagaagatctga

Peptide evidence:

VDQNTADITSLDGR  
YSTTDNNTSGTVSVGNAATGETR  
EAMDAVNLR  
KITGVAAGSADYDAVNVAQLTAVGDKVDQNTADITSLDGR  
TVSNVADGREAMD AVNLR  
DQNTADITSLDGR  
ATAANSTALGANSVADRENSVSVGSVGNR

Current sequence (peptide evidence in red):

Frame-2: 721aa (YPDSF\_1764)

MKSIQKDCNYLVRFAVSDSFIRDNSFRLLAIFMVTIFVPNTAFSFLYVNNANDPGCYVIADGGFTGVTNSDQNCYTLSSLNINNTGGQLFVGGKGGIAGKPSFIATPWTGTFITAVGTSNVATAYGFVQSNAGAFING  
DTYVKGGLFLNKRKATNLAPATISSTSDAVVGSQLYTVIQDGTTRYFHANSVNPQDSVPAGQDAIIVGATVNVNNGIGIGISSAVVGPSAVGGIAGPNTQATGIASALGAGSQAHSQSLALGAGATASQANSIAL  
GASSVTVVGAESDYSAYGLTAPQTSVGEVGMGTAAQGNRKITGVAAGSADYDVVNVVAQLTAVGDKVEQNTADITSLGGRVTNVEGGMTRITNGGGIKYFHTHSTEPSVAGSDDSVAIGPNAQASGTTSIAMGAGSTA  
QGAQSLALGAGAAASQANSIALGASSVTVVGAESDYSAYGLTAPQTSVGEVGMGTAAQGNRKITGVAAGSADYDAVNVAQLTAVGDKVDQNTADITSLDGRVTNVEGEMASITNGGGVYFHTHSTESDSVAGSDDS  
AIGPNAQASGTASVAGSGKTLASGNNGAVAIGDAASVSAEGSVALGQGSADNNGRAESYTGK**YSTTDNNTSGTVSVGNAATGETR**TVSNVADGREAMD AVNLRQLDGAMA AVGDTVSLGQNGTDGMFQVNNNSG  
QAKPSVTGTDAMAGGGQQDGGKQHRAGGQLSGGS

Frame-1: 182aa (YPDSF\_1763)

MRWRGGAGSVASGSHSTAMGTGSKATAANSTALGANSVADRENSVSVGSVGNRQLTNIIVGTVQGTDAVNLDQLNHSMNSVNTDANAYTDQRYALKEDLKKQDSTLSAGIAGAMAMASLTQPYPGASMATIG  
AASRYGQSALSUVGSSISDSGRWVSKLQASNTQDGMGVGVGVGYQW

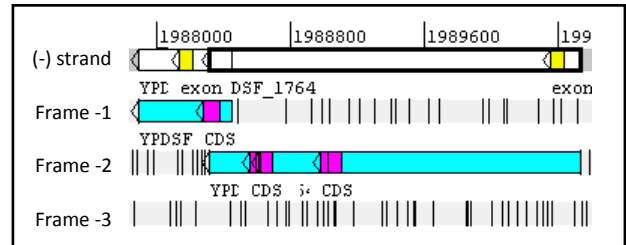

Strain: *Y. pseudotuberculosis* PB1/+  
Gene: YPTS\_2473

Classification: annotated as YadA domain-containing protein  
Boundaries of gene: 2740553..2743195

Oligo evidence:

atgtcgaatgtcaccacgacgccaatgcttatacagaccagcctattctgacttaagaagatctga

Peptide evidence:

|                                         |                                 |
|-----------------------------------------|---------------------------------|
| ATAANSTALGANSVADR                       | ITGVAAGSAGYDAVNVTQLTAVGNK       |
| ATAANSTALGANSVADRENSVSVGSVGNR           | KATNLAPATVSSSTSDAVVGSQLYTVIQDGT |
| ATNLAPATVSSSTSDAVVGSQLYTVIQDGT          | KITGVAAGSAGYDAVNVTQLTAVGNK      |
| EAMDAVNLR                               | PSATGTDAMAGGAGSVASGSHSTAMGTGSK  |
| ENSVSVGSVGNR                            | TVSNVADGR                       |
| GAESYTGK                                | VTNVEGEMTSITNGGGVK              |
| GQSALSVGVSSISDSGR                       | VTNVEGEMTSITNGGGIK              |
| ITGVAAGSADYDAVNVAQLTAVGDKVDQNTADITSLDGR | YSALKEDLKK                      |
|                                         | YSTTDNNTSGTVSVGNAATGETR         |

Current sequence (peptide evidence in red): 880aa

MKSIQKDCNYLARFAVSDSFIRDNSFRLLAIFMVTIFPGTAFSELYVNNANDPGCYAVVDNLLNFKGRITGIVTNIHICNTLLEANLNTNGGQLFVGGQGLPGYAPTPTWTGTFITAVGTSNVATAYGFVQKNG  
AFINGDTYVQGLFLNKRKATNLAPATVSSSTSDAVVGSQLYTVIQDGTTRYFHANSVNPQDSVPAGQDAIIVGATVNVNNGIGIGINSVAVGPSAVGGIAGPNTQATGTASTALGAGTQAQAQSLALGAGAVTR  
QVNSIALGASSVTVVGAQGSYAYGLPTTQASVEVGEIGTAQGNRKITGVAAGSAGYDAVNVTQLTAVGNKVDQNTADITSLDGRVTNVEGEMTSITNGGGIKYFHTHSTEPSVAGSDDSVAIGPNAQASGTTSIAMG  
AGSTAQAQSLALGAGAAASQANSIALGASSVTVVGAESNYSAYGLTASQTSVGEVGMGTAAQGNRKITGVAAGSADYDAVNVAQLTAVGDKVDQNTADITSLDGRVTNVEGEMTSITNGGGVYFHTHSTEPSVAS  
GSDSVAIGPNAQASGTASVAGSGKTLASGNNGAVAIGDAASVSAEGSVALGQGSADNNGRAESYTGK**YSTTDNNTSGTVSVGNAATGETR**TVSNVADGREAMD AVNLRQLDGAMA AVGDTVSLGQNGTDGMFQV  
NNNSGQAKPSATGTDAMAGGAGSVASGSHSTAMGTGSKATAANSTALGANSVADRENSVSVGSVGNRQLTNIIVGTVQGTDAVNLDQLNHSMNSVNTDANAYTDQRYALKEDLKKQDSTLSAGIAGAMAMASLT  
QPYPGASMATIG AASRYGQSALSUVGSSISDSGRWVSKLQASNTQDGMGVGVGVGYQW

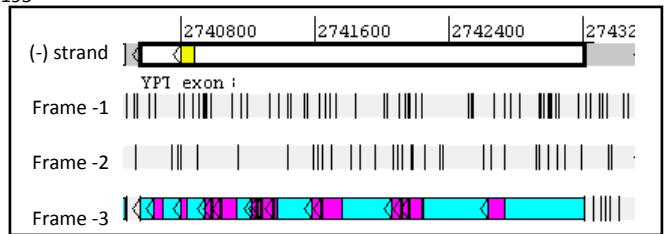

# Error 17

Strain: *Y. pestis* CO92  
Gene: YPO1726

Classification: expressed pseudogene  
Boundaries of gene: 1971786..1972133

Oligo evidence:

gcacggtcagatcgttgaagacaacagcatcttgattgatactttacgcctaaacgggatgattt

Peptide evidence:

DDFETVNNIV

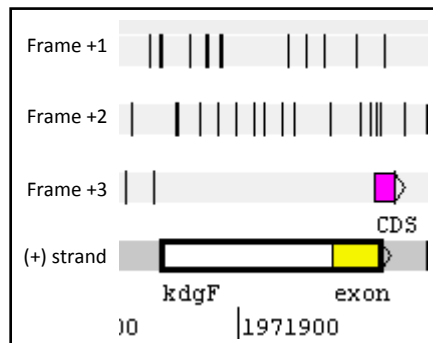

Proposed sequence (peptide evidence in red): 116aa

MKMFFINDETPWEELGNGIKRKVMTWSDLEMMVCVHFKEGAIGVAHKHDIHDQIAYVAAGSFEVEIEGQKRILKAGDAYRAVKNEMHGAVSLEDNSILIDTFTPKR**DDFETVNNIV**

Strain: *Y. pestis* pestoides F  
Gene: YPDSF\_1722

Classification: hypothetical protein  
Boundaries of gene: complement (1937726..1938076)

Oligo evidence:

gcacggtcagatcgttgaagacaacagcatcttgattgatactttacgcctaaacgggatgattt

Peptide evidence:

NA

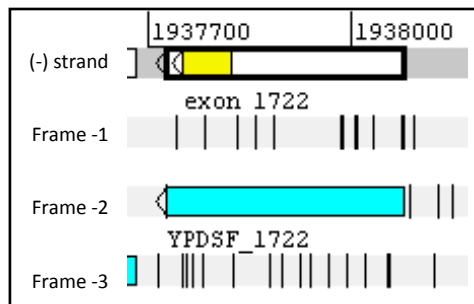

Current sequence (peptide evidence in red): 116aa

MKMFFINDETPWEELGNGIKRKVMTWSDLEMMVCVHFKEGAIGVAHKHDIHDQIAYVAAGSFEVEIEGQKRILKAGDAYRAVKNEMHGAVSLEDNSILIDTFTPKR**DDFETVNNIV**

Strain: *Y. pseudotuberculosis* PB1/+  
Gene: YPTS\_2429

Classification: cupin 2 domain-containing protein  
Boundaries of gene: complement (2692499..2692831)

Oligo evidence:

gcacggtcagatcgttgaagacaacagcatcttgattgatactttacgcctaaacgggatgattt

Peptide evidence:

NA

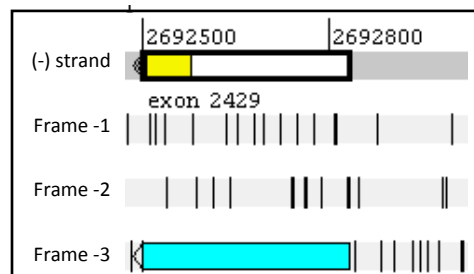

Current sequence (peptide evidence in red): 110aa

MKMFFINDETPWEALGNGIKRKVMTWSDLEMMVCVHFKEGAIGVAHKHDIHDQIAYVAAGSFEVEIEGQKRILKAGDAYRAVKNEMHGAVSLEDNSILIDTFTPKR**DDFL**

# Error 18

Strain: *Y. pestis* CO92  
Gene: YPO1728

Classification: expressed pseudogene with 2 insertions  
Boundaries of gene: Region1: 1973867..1974682  
Region2: 1976642..1976842

## Oligo evidence:

Gagtgatgattgatcgtggctcataccagcctgaagacttccggtgcagatttgcagaaacaaa  
aagtgatcacttttccgctgctgacactatcgcttagatggctaccggatgatagttgttag  
accggatgatagttttagatattccgctgaccctattgtcaaaatcgcgtaccagtgtagtaaa

## Peptide evidence:

ALNGYDDVAAETR  
GLDLLLIPDEPGEK  
IANELGLSSTTVSR  
LLELGHQR  
LQGYVQTMSEAGLMPLAGYLQK  
QNPFALGR  
RVDALIVAHTQPEDFR  
VLNNSTFLEMISWIGIELGK  
VLNNSTFLEMISWIGIELGKR  
YQSLIHLVETR  
ELQVLWQPEIGEGETDGVNR

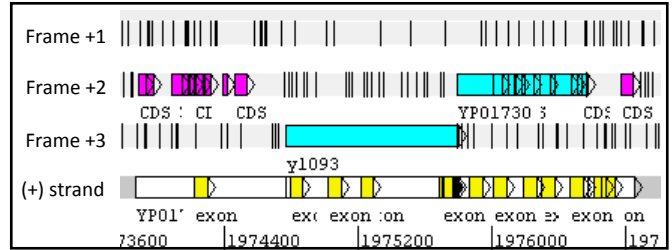

## Proposed sequence (peptide evidence in red):

Region1: 272aa

MSLKKIANELGLSSTTVSRALNGYDDVAAETRERIIDAARKLGYQPNLSARLKMGRDIAIALAYPSRPRVLNNSTFLEMISWIGIELGKRGDLLLIPDEPGEKQYQSLIHLVETRRVDALIVAHTQ  
PEDFRLQYLQKQNFPPALGRSHLPKYAWFDFDNHAGASLAVKRLLELGHQRIAFVSTDAISYVDQRLQGYVQTMSEAGLMPLAGYLQKADPTRPGGYLAASRLLALEVPPTAITDCNM  
LGDGVASALDKAGLLGGEGISLI

Region2: 66aa

AYDGLPDDSLLDIAVTPIVQNRTRTSVKGKQIASMICDLLGGKDPKELQVLWQPEIGEGETDGVNRG

Strain: *Y. pestis* pestoides F  
Gene: YPDSF\_1392

Classification: hypothetical protein  
Boundaries of gene: complement (1557701..1558717)

## Oligo evidence:

accggatgatagttttagatattccgctgaccctattgtcaaaatcgcgtaccagtgtagtaaa  
gagtgatgattgatcgtggctcataccagcctgaagacttccggtgcagatttgcagaaacaaa

## Peptide evidence:

ELQVLWQPEIGEGETDGVNR  
IANELGLSSTTVSR  
RLGYQPNLSAR  
ALNGYDDVAAETR  
RVDALIVAHTQPEDFR

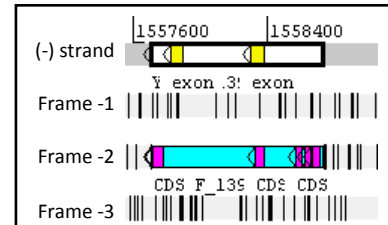

## Current sequence (peptide evidence in red): 338aa

MSLKKIANELGLSSTTVSRALNGYDDVAAETRERIIDAARKLGYQPNLSARLKMGRDIAIALAYPSRPRVLNNSTFLEMISWIGIELGKRGDLLLIPDEPGEKQYQSLIHLVETRRVDALIVAHTQ  
PEDFRLQYLQKQNFPPALGRSHLPKYAWFDFDNHAGASLAVKRLLELGHQRIAFVSTDAISYVDQRLQGYVQTMSEAGLMPLAGYLQKADPTRPGGYLAASRLLALEVPPTAITDCNM  
LGDGVASALDKAGLLGGEGISLIAYDGLPDDSLLDIAVTPIVQNRTRTSVKGKQIASMICDLLGGKDPKELQVLWQPEIGEGETDGVNRG

Strain: *Y. pseudotuberculosis* PB1/+  
Gene: YPTS\_1729

Classification: LacI family transcription regulator  
Boundaries of gene: 1959643..1960659

## Oligo evidence:

gagtgatgattgatcgtggctcataccagcctgaagacttccggtgcagatttgcagaaacaaa  
accggatgatagttttagatattccgctgaccctattgtcaaaatcgcgtaccagtgtagtaaa

## Peptide evidence:

ALNGYDDVAAETR  
ELQVLWQPEIGEGETDGVNR  
IANELGLSSTTVSR  
VLNNSTFLEMISWIGIELGK  
YQSLIHLVETR

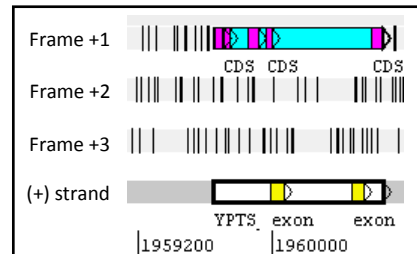

## Current sequence (peptide evidence in red): 338aa

MSLKKIANELGLSSTTVSRALNGYDDVAAETRERIIDAARKLGYQPNLSARLKMGRDIAIALAYPSRPRVLNNSTFLEMISWIGIELGKRGDLLLIPDEPGEKQYQSLIHLVETRRVDALIVAHTQ  
PEDFRLQYLQKQNFPPALGRSHLPKYAWFDFDNHAGASLAVKRLLELGHQRIAFVSTDAISYVDQRLQGYVQTMSEAGLMPLAGYLQKADPTRPGGYLAASRLLALEVPPTAITDCNM  
LGDGVASALDKAGLLGGEGISLIAYDGLPDDSLLDIAVTPIVQNRTRTSVKGKQIASMICDLLGGKDPKELQVLWQPEIGEGETDGVNRG

# Error 19

Strain: *Y. pestis* CO92  
Gene: YPO1923  
Oligo evidence:

Classification: expressed pseudogene  
Boundaries of gene: Frame-3: complement (2180652..2182037)  
Frame-1: complement (2178187..2180649)

aaccacaactggtgacttatctgtagaataaagggtgatatacgggatattttctctggtgattatcc  
taatgatggcattgccatcacccctgacctgccagaataaaaaactattattgataaagtcattgaatc

Peptide evidence:

LIDYLNQILELLPTR  
RTGIKFDPVYTK  
LLQESIINALPFAVIR  
SAQSLMLLDDIISAK  
TLSGGNPAVELQLLQSLLESNLQDAVTLTQLYR

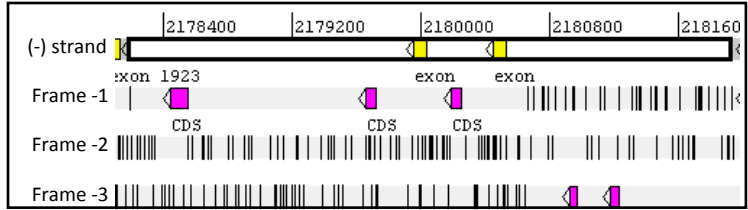

Proposed sequence (peptide evidence in red):

Frame-3: 462aa

MHTPIIWCNSLRRTFFLLRGRFSRLRTVLYCLLLISGQLHASLMTGRQCGDTGQPLTIHSIANSYNDDLLTPATDRQSSRRTVKVGVVMDANTPFVFNRRDNDNAIEGIVADYLKIIDASQSLFQMIGYCDYGLVNLNALENGQ  
IDLMAGTPMLAQPLIASHAFTNRHVEVRSKNWDPTKRTHPETVAIVNNEPLSPEFLFNHADRIVAYPNLQGLLAVAYGNADVFNANATSANYLIDQLQLTLQIRNFAPYHPAPYSFLARESNGKIDYLNQILELLP  
TRATGDIQQRWFGSKHHYNIDAKLLLTQEQLSWIQHHPVVTYIAPLDLAPLIFDRRTGEMAGFSVDLIDIIARRTGKIFDPVYTKDTGEGVRSFKAGKVDLLPIAVRNGQYGNLYSSIAQSLWGIMTREDRMDINNV  
GDLAGKRVGIQAGSASSIISNPLLAQRITFVEAPDT

Frame-1: 820aa

TLVRWLQKQKVDVAVKNNMTANYLSAQNFSPNIKTAVAVAGEEPLMMAFAIRPDLPELKTIDKIVIESIPPEEFDNLTEWSTFKPKPISFDESSLNELLMIALKISSGLLVFGLYLCYLVFNKRRQAKLLHARLLQQESIIN  
ALPFAVIRTAGSELAVYNSHFADVHSDKLYDMLNQTHEPAHWPMTPSPLDREIDKYCRSVLLNRKPLQVLDLVEIKGDIRDFLWIIPLNNAEQGLGGWLDISQRKTVERQLEAARVEAESANRKTSTFLATISHELRTPM  
YAIMGELLEIRSNRPVEKDTLVTVSKSAQSLMLLDDIISAKIEAGQLSIHPTAVDFHQEMERMFYQPIANERLRFSGWLDHIPPMLMADMLRVRQVMGNLLGNALFKTEQGSVSDITWEPSEDEQHGVMNIDI  
TDTGIGISPAQAATLFPQFSQANEGKSPRFGGSGGLWICHQLIHKMGKIALESQLGKGTSLITLPLNIATADDLAQDAAIHTVDDERLNQLRNLRLVDDLPANRQLLQQLAFIGIEQVVTVAENGAKACQLQHNN  
FDVVITDCSMPVMDGYELAAHIRQDPALKDLVIGCTADAREESAARCIDAGMNACMIKPVADTLQATLLRDKDIVSQISNTNHSQSTEDNDRGGNQSNLSEKNTAQENAPAIHSTTTISVNRLLAAQNKLRSLSGGN  
PAVELQLLQSLLESNLQDAVTLTQLYRQLCVEDEDVVTVDTAETVDTADTVEDGETRGPSTVGRHSTAGSDHIPHADIYKQMASLVHRIKGSVQLIDAQELVASCVKFESQ

Strain: *Y. pestis* pestoides F

Classification: signal transduction histidine kinase  
Boundaries of gene: 1352820..1356821

Gene: YPDFS\_1200

Oligo evidence:

taatgatggcattgccatcacccctgacctgccagaataaaaaactattattgataaagtcattgaatc  
aaccacaactggtgacttatctgtagaataaagggtgatatacgggatattttctctggtgattatcc

Peptide evidence:

LIDYLNQILELLPTR  
SAQSLMLLDDIISAK  
DDNAIEGIVADYK  
ILVDDLPANR  
TKSTFLATISHEL  
TLSGGNPAVELQLLQSLLESNLQDAVTLTQLYR

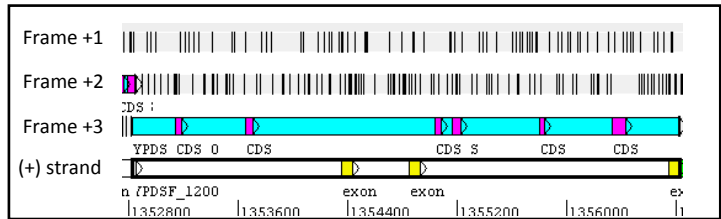

Current sequence (peptide evidence in red): 1333aa

MHTPIIWCNSLRRTFFLLRGRFSRWSFLRTVLYCLLLISGQLHASLMTGRQCGDTGQPLTIHSIANSYNDDLLTPATDRQSSRRTVKVGVVMDANTPFVFNRRDNDNAIEGIVADYLKIIDASQSLFQMIGYCDYGLVNL  
ALENGQIDLMAGTPMLAQPLIASHAFTNRHVEVRSKNWDPTKRTHPETVAIVNNEPLSPEFLFNHADRIVAYPNLQGLLAVAYGNADVFNANATSANYLIDQLQLTLQIRNFAPYHPAPYSFLARESNGKIDYLNQILELLP  
TRATGDIQQRWFGSKHHYNIDAKLLLTQEQLSWIQHHPVVTYIAPLDLAPLIFDRRTGEMAGFSVDLIDIIARRTGKIFDPVYTKDTGEGVRSFKAGKVDLLPIAVRNGQYGNLYSSIAQSLWGIMTREDR  
MDINNVGDLAGKRVGIQAGSASSIISNPLLAQRITFVEAPDTMTLVRWLQKQKVDVAVKNNMTANYLSAQNFSPNIKTAVAVAGEEPLMMAFAIRPDLPELKTIDKIVIESIPPEEFDNLTEWSTFKPKPISFDESSLNELL  
MIALKISSGLLVFGLYLCYLVFNKRRQAKLLHARLLQQESIINALPFAVIRTAGSELAVYNSHFADVHSDKLYDMLNQTHEPAHWPMTPSPLDREIDKYCRSVLLNRKPLQVLDLVEIKGDIRDFLWIIPLNNAEQGLL  
GWLDSQRKTVERQLEAARVEAESANRKTSTFLATISHELRTPMYAIMGELLEIRSNRPVEKDTLVTVSKSAQSLMLLDDIISAKIEAGQLSIHPTAVDFHQEMERMFYQPIANERLRFSGWLDHIPPMLMADML  
RVRQVMGNLLGNALFKTEQGSVSDITWEPSEDEQHGVMNIDI  
TDTGIGISPAQAATLFPQFSQANEGKSPRFGGSGGLWICHQLIHKMGKIALESQLGKGTSLITLPLNIATADDLAQDAAIHTVDDERLNQLRNLRL  
ILVDDLPANRQLLQQLAFIGIEQVVTVAENGAKACQLQHNNFDVVITDCSMPVMDGYELAAHIRQDPALKDLVIGCTADAREESAARCIDAGMNACMIKPVADTLQATLLRDKDIVSQISNTNHSQSTEDNDRGGN  
QSNLSEKNTAQENAPAIHSTTTISVNRLLAAQNKLRSLSGGNPAVELQLLQSLLESNLQDAVTLTQLYRQLCVEDEDVVTVDTAETVDTADTVEDGETRGPSTVGRHSTAGSDHIPHADIYKQMASLVHRIKGSVQ  
LIDAQELVASCVKFESQLHAQNKAAMTHGADCLALFIESNQLLVTLSIQPKAATEDSPQ

Strain: *Y. pseudotuberculosis* PB1/+

Classification: histidine kinase

Gene: YPTS\_1971

Boundaries of gene: complement (2172650..2176678)

Oligo evidence:

atcfaatcagttattagtcacataattctcaatataagccgctactgaagactgccacaataa  
taatgatggcattgccatcacccctgacctgccagaataaaaaactattattgataaagtcattgaatc

Peptide evidence:

SAQSLMLLDDIISAK  
SKNWDPTKR  
TLSGGNPAVELQLLQSLLESNLQDAVTLTQLYR

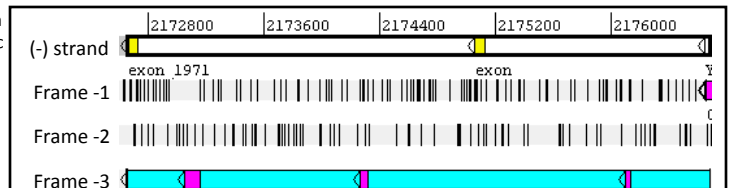

Current sequence (peptide evidence in red): 1342aa

MHTPIIWCNSLRRTFFLLRARFLRARFSRWSFFLRTVLCCLLLISGQLHASLMTGRQCGDTGQPLTIHSIANSYNDDLLTPATDRQSSRRTVKVGVVMDANTPFVFNRRDNDNAIEGIVADYL  
KIIDASQSLFQMIGYCDYGLVNLNALENGQIDLMAGTPMLAQPLIASHAFTNRHVEVRSKNWDPTKRTHPETVAIVNNEPLSPEFLFNHADRIVAYPNLQGLLAVAYGNADVFNANATS  
ANYLIDQLQLTLQIRNFAPYHPAPYSFLARESNGKIDYLNQILELLPTRATGDIQQRWFGSKHHYNIDAKLLLTQEQLSWIQHHPVVTYIAPLDLAPLIFDRRTGEMAGFSVDLIDIIARRTG  
KIFDPVYTKDTGEGVRSFKAGKVDLLPIAVRNGQYGNLYSSIAQSLWGIMTREDRMDINNVGDLAGKRVGIQAGSASSIISNPLLAQRITFVEAPDTMTLVRWLQKQKVDVAVKNNM  
TANYLSAQNFSPNIKTAVAVAGEEPLMMAFAIRPDLPELKTIDKIVIESIPPEEFDNLTEWSTFKPKPISFDESSLNELLMIALKISSGLLVFGLYLCYLVFNKRRQAKLLHARLLQQESIINALPFA  
VFIRTASGELAVYNSHFADVHSDKLYDMLNQTHEPAHWPMTPSPLDREIDKYCRSVLLNRKPLQVLDLVEIKGDIRDFLWIIPLNNAEQGLGGWLDISQRKTVERQLEAARVEAESANRKTST  
FLATISHELRTPMYAIMGELLEIRSNRPVEKDTLVTVSKSAQSLMLLDDIISAKIEAGQLSIHPTAVDFHQEMERMFYQPIANERLRFSGWLDHIPPMLMADMLRVRQVMGNLLGN  
ALFKTEQGSVSDITWEPSEDEQHGVMNIDI  
TDTGIGISPAQAATLFPQFSQANEGKSPRFGGSGGLWICHQLIHKMGKIALESQLGKGTSLITLPLNIATADDLAQDAAIHTVDDERLNQL  
RNLRLVDDLPANRQLLQQLAFIGIEQVVTVAENGAKACQLQHNNFDVVITDCSMPVMDGYELAAHIRQDPALKDLVIGCTADAREESAARCIDAGMNACMIKPVADTLQATLLRDKDIV  
SQIANNTNHSSTEDNDRGGNQSNLSEKNTAQENAPAIHSTTTISVNRLLAAQNKLRSLSGGNPAVELQLLQSLLESNLQDAVTLTQLYRQLCVEDEDVVTVDTAETVDTADTVEDG  
ETRGPSTVGRHSTAGSDHIPHADIYKQMASLVHRIKGSVQLIDAQELVASCVKFESQLHAQNKAAMTHGADCLALFIESNQLLVTLSIQPKAATEDSPQ

# Error 20

Strain: *Y. pestis* CO92  
Gene: YPO1967

Classification: expressed pseudogene  
Boundaries of gene: 2235390..2236337

Oligo evidence:

tgatggttgcgtttgcttttaattatcaaaacattcagggcagcggcgtcagtttgcagggcagc  
ccaataaccagtttgagaatggatccgccctctcttgaacgaacggtgcaatagtgatccacacca

Peptide evidence:

NDNFFGLVEGLKVAQAQYQGR

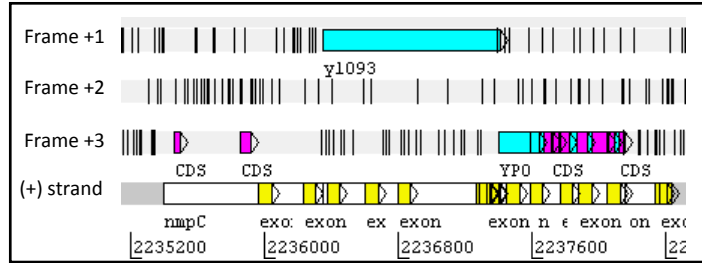

Proposed sequence (peptide evidence in red): 315aa

MKNIAMALAATLGIIIPALSSAAEIYNKDGKLDYGRVAAKYLFKKQSNEDATYVRIGFKGETKINSQLTGFQWEYNIAANNTESSQGDKGNKTRLGFAGLKLADYGSFDYGRNYGVVYDVLV  
YTDMLPEFGGDSMAATDNYMTARSTGLATYRNDNFFGLVEGLKVAQAQYQGRNEDGDVTRNERSIQKANGDGFGLSFNYQNIQGGSGVSFAGAYSSNRTEGQKELVNSAAGDKAQAWAT  
GLKYDANQAYIAAMYGETLNMTYPKRLIANKTQNVELVAQYQFENGIRPSLVNTNGAIVHTQRLKSDPGGNLSS

Strain: *Y. pestis* pestoides F  
Gene: YPDSF\_1156

Classification: hypothetical protein  
Boundaries of gene: complement (1298434..1299516)

Oligo evidence:

taacgataagaacccattggccttgaatacggatgatgttggcgttaaacctgactaccgttttaa  
tggtgattataagattaatttattggataacgataagaacccattggccttgaatacggatgatgtt  
aataccagtttgagaatggatccgccctctcttgcctacatacaatctaaaggaaggatctggcggg  
tgatggttgcgtttgcttttaattatcaaaacattcagggcagcggcgtcagtttgcagggcagc

Peptide evidence:

NA

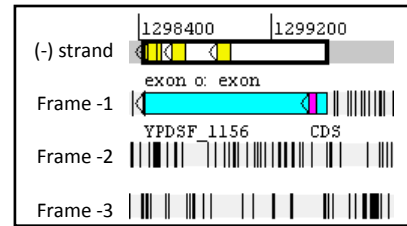

Current sequence (peptide evidence in red): 360aa

MKNIAMALAATLGIIIPALSSAAEIYNKDGKLDYGRVAAKYLFKKQSNEDATYVRIGFKGETKINSQLTGFQWEYNIAANNTESSQGDKGNKTRLGFAGLKLADYGSFDYGRNYGVVYDVLV  
YTDMLPEFGGDSMAATDNYMTARSTGLATYRNDNFFGLVEGLKVAQAQYQGRNEDGDVTRNERSIQKANGDGFGLSFNYQNIQGGSGVSFAGAYSSNRTEGQKELVNSAAGDKAQAWAT  
GLKYDANQAYIAAMYGETLNMTYPKRLIANKTQNVELVAQYQFENGIRPSLAYIQSKGDLAVGDTDLVKYAEIGVYTHFNKNMYTYVDYKINLLDNDKNPLGLNTDDVVAVNLTYRF

Strain: *Y. pseudotuberculosis* PB1/+  
Gene: YPTS\_2016

Classification: porin  
Boundaries of gene: 2230091..2230789

Oligo evidence:

tgatggttgcgtttgcttttaattatcaaaacattcagggcagcggcgtcagtttgcagggcagc

Peptide evidence:

NA

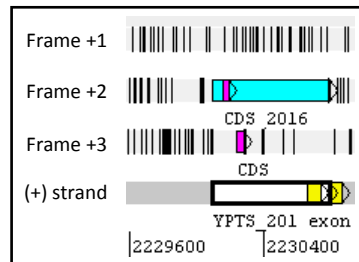

Current sequence (peptide evidence in red): 232aa

MKNIAMALAATLGIIIPALSSAAEIYNKDGKLDYGRVAAKYLFKKQSNEDATYVRIGFKGETKINSQLTGFQWEYNIAANNTESSQGDKGNKTRLGFAGLKLADYGSFDYGRNYGVVYDVLV  
YTDMLPEFGGDSMAATDNYMTARSTGLATYRNDNFFGLVEGLKVAQAQYQGRNEDGDVTRNERSIQKANGDGFGLSFNYQNIQGGSGVSFAGAYSSNRTEGQKQVSTTDEK

# Error 21

Strain: Y. pestis CO92  
Gene: YPO2171

Classification: expressed pseudogene (purU)  
Boundaries of gene: complement (2442302..2443171)

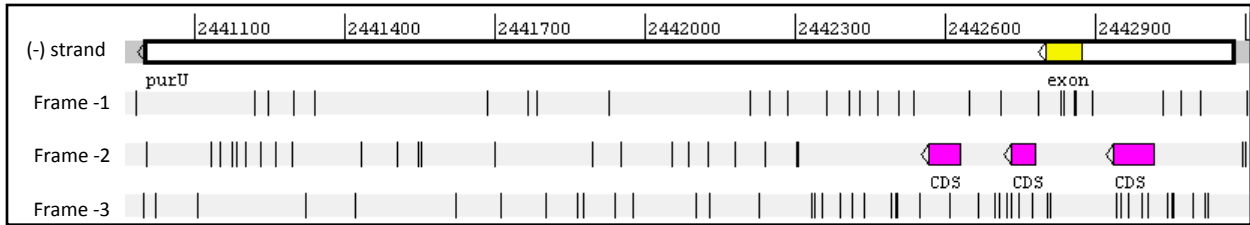

Oligo evidence:

gacttattaatgaagagtgcttatggcttagatgtagaaattcggcagtcattggaacatgatg

Peptide evidence:

FDIPFHLVSHEGLTR  
FPYQIINHHSFLPAFIGAR  
TELEGIFNDTLLADLDDALPEGTNR

Proposed sequence (peptide evidence in red): 289aa

MPHQNVQKKVLRITICPDAKGLIAKITNICYKHQLNIVQNNFVDHLTGRFFMRTELEGIFNDTLLADLDDALPEGTNRRLHVAGRRRIIIMVTKEAHCLGDLMLKMSAYGGLDVEIAAVIGNHD  
ALQNLVERFDIPFHLVSHEGLTREQHDQQLIEKIEQYQPDYVVLAKYMRVLTAFVQRFPYQIINHHSFLPAFIGARPYHQAYERGVIIGATAHYVNDLDEGPIIMQDVINVDHSYTAEDM  
MRAGR DVEKNVLSSALYRSLIILCNCHRIKGRSGGHRTR

Strain: Y. pestis pestoides F  
Gene: YPDSF\_0963

Classification: annotated as purU  
Boundaries of gene: 1093071..1093919

Oligo evidence:

gacttattaatgaagagtgcttatggcttagatgtagaaattcggcagtcattggaacatgatg

Peptide evidence:

IEQYQPDYVVLAK  
EQHDQQLIEK  
FDIPFHLVSHEGLTR  
FPYQIINHHSFLPAFIGAR  
TELEGIFNDTLLADLDDALPEGTNR

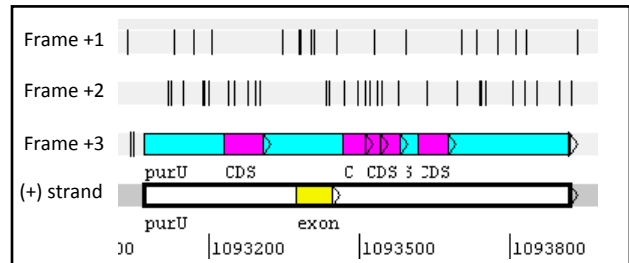

Current sequence (peptide evidence in red): 282aa

MPHQNVQKKVLRITICPDAKGLIAKITNICYKHQLNIVQNNFVDHLTGRFFMRTELEGIFNDTLLADLDDALPEGTNRRLHVAGRRRIIIMVTKEAHCLGDLMLKMSAYGGLDVEIAAVIGNHD  
ALQNLVERFDIPFHLVSHEGLTREQHDQQLIEKIEQYQPDYVVLAKYMRVLTAFVQRFPYQIINHHSFLPAFIGARPYHQAYERGVIIGATAHYVNDLDEGPIIMQDVINVDHSYTAEDM  
MRAGR DVEKNVLSSALYRVLAQRVYVYGNRTVIL

Strain: Y. pseudotuberculosis PB1/+  
Gene: YPTS\_2163

Classification: annotated as purU  
Boundaries of gene: complement (2386069..2386917)

Oligo evidence:

gacttattaatgaagagtgcttatggcttagatgtagaaattcggcagtcattggaacatgatg

Peptide evidence:

FPYQIINHHSF  
FPYQIINHHSFLPAFIGAR  
HQLNIVQNNFVDHLTGR  
IEQYQPDYVVLAK  
TELEGIFNDTLLADLDDALPEGTNR

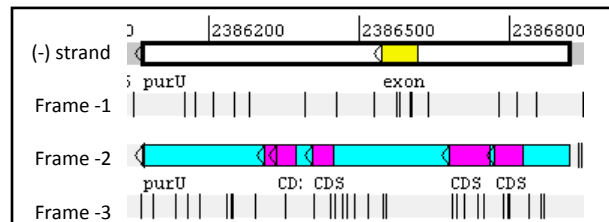

Current sequence (peptide evidence in red): 282aa

MPHQNVQKKVLRITICPDAKGLIAKITNICYKHQLNIVQNNFVDHLTGRFFMRTELEGIFNDTLLADLDDALPEGTNRRLHVAGRRRIIIMVTKEAHCLGDLMLKMSAYGGLDVEIAAVIGNHD  
ALQNLVERFDIPFHLVSHEGLTREQHDQQLIEKIEQYQPDYVVLAKYMRVLTAFVQRFPYQIINHHSFLPAFIGARPYHQAYERGVIIGATAHYVNDLDEGPIIMQDVINVDHSYTAEDM  
MRAGR DVEKNVLSSALYRVLAQRVYVYGNRTVIL

# Error 22

Strain: *Y. pestis* CO92  
Gene: YPO2249

Classification: expressed pseudogene  
Boundaries of gene: Frame+1: 2524378..2526162  
Frame+2: 2526215..2526436

## Oligo evidence:

aacacgagtgatattattagcgagggaagtgtttcaacattaatcaggtgccgtaagtacttt  
ataacacaaggcagtcaccgaactgccagcatgacgaattactgaattaaacggcagttacgctc

## Peptide evidence:

QVIMDKVLVHHALTTLEVLIFILVIVGVYEVILKGLR

## Proposed sequence (peptide evidence in red):

Frame+1: 594aa

MENHVHSALICASRLIRLAGLNPMDIETFSQKVAIDTSVKTTLASLQRYIVQFSQTASVRFKIRKQALEKIRQEQLPLAFDRDQGNFILLARMNEQQVLLQYADDKKPQMLSYSQSLADMWGG  
MILCCSHSRFDIRWFIPPLRRHRKPLMQVLLSLLQLFALISPLFFQVIMDKVLVHHALTTLEVLIFILVIVGVYEVILKGLREYIFHTTTTRVDILLGGKLFQHLIRLPLSYFKQRHVGNIVARVRELD  
NIRDFITGSALTLCDVVFTLVLFVIMWCISPLLLIILSTLPFYLLAVMTTRPLQKKVEALCGFAAQNGAFLTETVSGVETVKSALALEPRMRQRWESQTRDFAQANFQVQNLQNLSSQAAQLL  
QKVAGALVIVIGAYHVMVSVLSIGQLIAFNMLALQALMPMSKLVLDWQQSIRAQVGLKLISDILSLPVEPADPAAPHPAISGNILLKNVAFRYRPDLPVLHDLNLSIRAGEHIGLVGPSGSG  
KSTVARLLQRLYNTEQGVITIDGYPINHLSPEYLRQVGVVMQESYLFNRTVRENIAHSRPTATLTVVNAASLAGANAFILALRESPDLNF

Frame+2: 108aa

VLTPLFWRYANPRILIFDEATSALDDESQSEIQKNMARIANRTVITIAHRLSTVRHCHRIAVITQGRVTELASHDELLQNGSYARLWQQQVHFVNQNKSTLTKTSPL

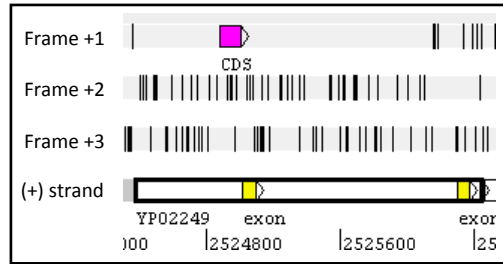

Strain: *Y. pestis* pestoides F  
Gene: YPDSF\_0885 / YPDSF\_0886

Classification: YPDSF\_0885 annotated as RTX toxin ABC transporter ATP binding/permease subunits.  
YPDSF\_0886 annotated as hypothetical protein  
Boundaries of gene: YPDSF\_0886 Frame-2: complement(1010123..1011907)  
YPDSF\_0885 Frame-1: complement(1009849..1010175)

## Oligo evidence:

aacacgagtgatattattagcgagggaagtgtttcaacattaatcaggtgccgtaagtacttt  
ataacacaaggcagtcaccgaactgccagcatgacgaattactgaattaaacggcagttacgctc

## Peptide evidence:

NA

## Current sequence (peptide evidence in red):

Frame-2: 594aa (YPDSF\_0886)

MENHVHSALICASRLIRLAGLNPMDIETFSQKVAIDTSVKTTLASLQRYIVQFSQTASVRFKIRKQALEKIRQEQLPLAFDRDQGNFILLARMNEQQVLLQYADDKKPQMLSYSQSLADMWGG  
MILCCSHSRFDIRWFIPPLRRHRKPLMQVLLSLLQLFALISPLFFQVIMDKVLVHHALTTLEVLIFILVIVGVYEVILKGLREYIFHTTTTRVDILLGGKLFQHLIRLPLSYFKQRHVGNIVARVRELD  
NIRDFITGSALTLCDVVFTLVLFVIMWCISPLLLIILSTLPFYLLAVMTTRPLQKKVEALCGFAAQNGAFLTETVSGVETVKSALALEPRMRQRWESQTRDFAQANFQVQNLQNLSSQAAQLL  
QKVAGALVIVIGAYHVMVSVLSIGQLIAFNMLALQALMPMSKLVLDWQQSIRAQVGLKLISDILSLPVEPADPAAPHPAISGNILLKNVAFRYRPDLPVLHDLNLSIRAGEHIGLVGPSGSG  
KSTVARLLQRLYNTEQGVITIDGYPINHLSPEYLRQVGVVMQESYLFNRTVRENIAHSRPTATLTVVNAASLAGANAFILALRESPDLNF

Frame-1: 108aa (YPDSF\_0885)

VLTPLFWRYANPRILIFDEATSALDDESQSEIQKNMARIANRTVITIAHRLSTVRHCHRIAVITQGRVTELASHDELLQNGSYARLWQQQVHFVNQNKSTLTKTSPL

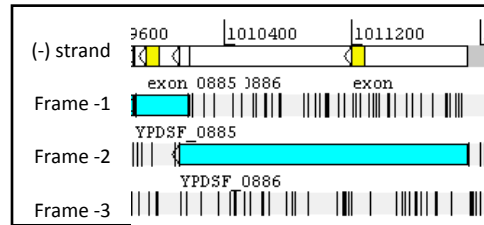

Strain: *Y. pseudotuberculosis* PB1/+  
Gene: YPTS\_2239

Classification: type I secretion system ATPase  
Boundaries of gene: 2465281..2467428

## Oligo evidence:

aacacgagtgatattattagcgagggaagtgtttcaacattaatcaggtgccgtaagtacttt  
ataacacaaggcagtcaccgaactgccagcatgacgaattactgaattaaacggcagttacgctc

## Peptide evidence:

NA

## Current sequence (peptide evidence in red): 715aa

MENHVHSALICASRLIRLAGLNPMDIETFSQKVAIDTSVKTTLASLQRYIVQFSQTASVRFKIRKQALEKIRQEQLPLAFDRDQGNFILLARMNEQQVLLQYADDKKPQMLSYSQSLADMWGG  
MILCCSHSRFDIRWFIPPLRRHRKPLMQVLLSLLQLFALISPLFFQVIMDKVLVHHALTTLEVLIFILVIVGVYEVILKGLREYIFHTTTTRVDILLGGKLFQHLIRLPLSYFKQRHVGNIVARVRELD  
NIRDFITGSALTLCDVVFTLVLFVIMWCISPLLLIILSTLPFYLLAVMTTRPLQKKVEALCGFAAQNGAFLTETVSGVETVKSALALEPRMRQRWESQTRDFAQANFQVQNLQNLSSQAAQLL  
QKVAGALVIVIGAYHVMVSVLSIGQLIAFNMLALQALMPMSKLVLDWQQSIRAQVGLKLISDILSLPVEPADPAAPHPAISGNILLKNVAFRYRPDLPVLHDLNLSIRAGEHIGLVGPSGSG  
KSTVARLLQRLYNTEQGVITIDGYPINHLSPEYLRQVGVVMQESYLFNRTVRENIAHSRPTATLTVVNAASLAGANAFILALPLGYDTVLSEGGSSSGGQRQRIARTLLANPRILIFDEATS  
ALDDESQSEIQKNMARIANRTVITIAHRLSTVRHCHRIAVITQGRVTELASHDELLQNGSYARLWQQQVHFVNQNKSTLTKTSPP

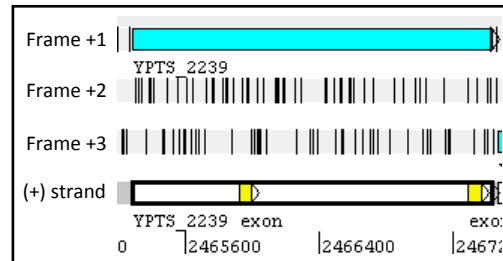

# Error 23

Strain: *Y. pestis* CO92  
Gene: YPO2398

Classification: expressed pseudogene  
Boundaries of gene: 2694609..2695628

## Oligo evidence:

actgccgcccgctaatagtcgcttaattggcgaaaatacaacctttactgttccaatgatggtcgccct  
gcctgtagcgtctcaggatgagcaacaggcacaggctgaagcactactgtcaacgacggatgaaaagtga

## Peptide evidence:

DTPTMVTISISQK  
EGIVINLAELR  
GEYLHGTNADFGIGLR  
IGLLGMLEANPGTDPYLPLPGSVLTIPNQMLLPDTPR  
IPNPTWPTANIR  
KNYLAEGITLPSVVPAGPDNPMGQFALR  
LIGENTTFTVPNDGRPLEAIAADYK  
LRPDDIEALFNSVPK  
LSAGRGEYLHGTNADFGIGLR  
NYLAEGITLPSVVPAGPDNPMGQFALR  
RYVEVHQPLSR  
VSDDDPQTMPIAIGSGLQK  
VIVYPIGIGQLGR  
VQIINEPVK  
YVEVHQPLSR

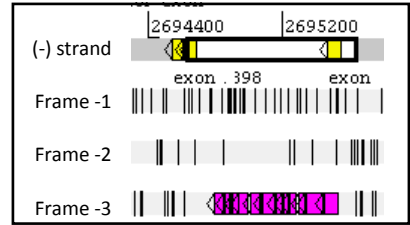

Proposed sequence (peptide evidence in red): 339aa

MKRALTLIGMLFATCLAGSLTAANANEYPLPPANSRLIGENTTFTVPNDGRPLEAIAADYKIGLLGMLEANPGTDPYLPLPGSVLTIPNQMLLPDTPREGIVINLAELRLYYYPKGQNKVIVYPIGIGQLGRDPTMVTISISQKIPNPTWPTANIRKNYLAEGITLPSVVPAGPDNPMGQFALRLSAGRGEYLHGTNADFGIGLRVSSGCIRLRPDDIEALFNSVPKGTRVQIINEPVKYAVEPDGKRYVEVHQPLSRVSDDDPQTMPIAIGSGLQKFINDSQTDAKAVQDAIVRRSGMPTIVTVGEASTQQAPTVPASQDEQQAQAEALLSTTDEK

Strain: *Y. pestis* pestoides F  
Gene: YPDSF\_0750

Classification: hypothetical protein  
Boundaries of gene: 847913..848932

## Oligo evidence:

actgccgcccgctaatagtcgcttaattggcgaaaatacaacctttactgttccaatgatggtcgccct  
gcctgtagcgtctcaggatgagcaacaggcacaggctgaagcactactgtcaacgacggatgaaaagtga

## Peptide evidence:

DTPTMVTISISQK  
EGIVINLAELR  
FINDSQTDAK  
GEYLHGTNADFGIGLR  
IGLLGMLEANPGTDPYLPLPGSVLTIPNQMLLPDTPR  
IPNPTWPTANIR  
KNYLAEGITLPSVVPAGPDNPMGQFALR  
LIGENTTFTVPNDGRPLEAIAADYK  
LRPDDIEALFNSVPK  
LSAGRGEYLHGTNADFGIGLR  
NYLAEGITLPSVVPAGPDNPMGQFALR

RYVEVHQPLSR  
VSDDDPQTMPIAIGSGLQK  
VIVYPIGIGQLGR  
VQIINEPVKYAVEPDGKR  
YAVEPDGKR  
YVEVHQPLSR

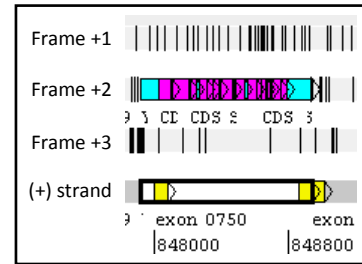

Current sequence (peptide evidence in red): 339aa

MKRALTLIGMLFATCLAGSLTAANANEYPLPPANSRLIGENTTFTVPNDGRPLEAIAADYKIGLLGMLEANPGTDPYLPLPGSVLTIPNQMLLPDTPREGIVINLAELRLYYYPKGQNKVIVYPIGIGQLGRDPTMVTISISQKIPNPTWPTANIRKNYLAEGITLPSVVPAGPDNPMGQFALRLSAGRGEYLHGTNADFGIGLRVSSGCIRLRPDDIEALFNSVPKGTRVQIINEPVKYAVEPDGKRYVEVHQPLSRVSDDDPQTMPIAIGSGLQKFINDSQTDAKAVQDAIVRRSGMPTIVTVGEASTQQAPTVPASQDEQQAQAEALLSTTDEK

Strain: *Y. pseudotuberculosis* PB1/+  
Gene: YPTS\_2382

Classification: ErfK/YbiS/YcfS/YnhG family protein  
Boundaries of gene: complement (2641423..2642487)

## Oligo evidence:

gtctcaggatgagcaacaggcacaggctgaagcactacaaccgacagaagctcagtgatgcctaagctg  
actgccgcccgctaatagtcgcttaattggcgaaaatacaacctttactgttccaatgatggtcgccct

## Peptide evidence:

DTPTMVTISISQK  
EGIVINLAELR  
FINDSQTDAK  
GEYLHGTNADFGIGLR  
IGLLGMLEANPGTDPYLPLPGSVLTIPNQMLLPDTPR  
IPNPTWPTANIR  
IPNPTWPTANIRK  
KNYLAEGITLPSVVPAGPDNPMGQFALR  
LIGENTTFTVPNDGRPLEAIAADYK  
LRPDDIEALFNSVPK  
LSAGRGEYLHGTNADFGIGLR  
LVQPGPVYSENN  
NYLAEGITLPSVVPAGPDNPMGQFALR

RYVEVHQPLSR  
SGMPTIVTVGEASTQQAPTVPASQDEQQAQAEALQPTESVMPK  
VSDDDPQTMPIAIGSGLQK  
VIVYPIGIGQLGR  
VQIINEPVKYAVEPDGKR  
YLAEGITLPSVVPAGPDNPMGQFALR  
YVEVHQPLSR

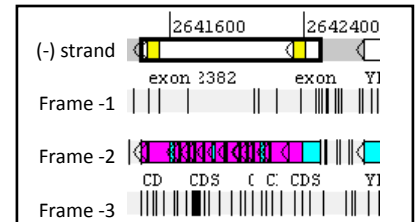

Current sequence (peptide evidence in red): 354aa

MKRALTLIGMLFATCLAGSLTAANANEYPLPPANSRLIGENTTFTVPNDGRPLEAIAADYKIGLLGMLEANPGTDPYLPLPGSVLTIPNQMLLPDTPREGIVINLAELRLYYYPKGQNKVIVYPIGIGQLGRDPTMVTISISQKIPNPTWPTANIRKNYLAEGITLPSVVPAGPDNPMGQFALRLSAGRGEYLHGTNADFGIGLRVSSGCIRLRPDDIEALFNSVPKGTRVQIINEPVKYAVEPDGKRYVEVHQPLSRVSDDDPQTMPIAIGSGLQKFINDSQTDAKAVQDAIVRRSGMPTIVTVGEASTQQAPTVPASQDEQQAQAEALQPTESVMPKLVQPGPVYSENN



# Error 24

Strain: *Y. pestis* CO92  
Gene: YPO2412

Classification: expressed pseudogene  
Boundaries of gene: complement (2713182..2714645)

## Oligo evidence:

tttcagcatttctactatcggcagcaacctaaagcaagtcaacaattagcggattatgttattgccgc  
ctgaatttgatgatttagcggcgttaccgccagattggggaaaaacacctcgagatctctgttccagctg

## Peptide evidence:

DSQDNDLLTGLLSLMIK  
LQQESIDDDQR  
EFLASEALHHLGIPTSR  
FGHFEHFYR  
QVQQLADYVIAR

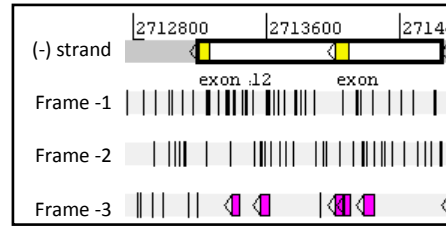

## Proposed sequence (peptide evidence in red): 487aa

MKPRMEYAPEFDNSYARQLSGFYTRLQPTPLKGARLLYHKSPLAQELGLDAHWFTEPKTAVWAGEALLPGMEPLAQVYSGHQFGMWAGQLGDGRGILLGEQRLNDGRYMDWHLKGAG  
LTPYSRMGDGRAVLRVIREFLASEALHHLGIPTSRALTIIVTSDHPIYREQTERGAMLLRVAESHIRFGHFEHFYRQQPKQVQQLADYVIARHWPQVWGHQECYRLWFTDVVERTARLMA  
HW#TVGFAHGVMMNTDNMSILGITMDYGPFGFLDDYVPGYICNHSDHQGRYAYDNQPAVALWNLHRLGHALSGLMSADQLQALEAYEPALMVAYGEQMRRAKLGFLERDSQDNDLLTG  
LLSLMIKEGRDYTRFRLLSEVEVHSAQSPLRDDFIDRAAFDDWYRRYRSRLQQESIDDDQRQQSMKAANPKYILRNYLAQQAITQAEKDDIQPLRHLQALQQPFTDQPEFDDLAALPPD  
WGHKLEISCS

Strain: *Y. pestis* pestoides F  
Gene: YPDSF\_0737

Classification: annotated as hypothetical protein  
Boundaries of gene: 828912..830375

## Oligo evidence:

tttcagcatttctactatcggcagcaacctaaagcaagtcaacaattagcggattatgttattgccgc  
gcaaacctcgggtttgctcatgggtgatgaataccgataatgtcaattctggcattactatggat  
ctgaatttgatgatttagcggcgttaccgccagattggggaaaaacacctcgagatctctgttccagctg

## Peptide evidence:

DSQDNDLLTGLLSLMIK  
EFLASEALHHLGIPTSR  
LGHALSGLMSADQLQALEAYEPALMVAYGEQMR  
LLYHKSPLAQELGLDAHWFTEPK  
NYLAQQAITQAEKDDIQPLR  
QVQQLADYVIAR

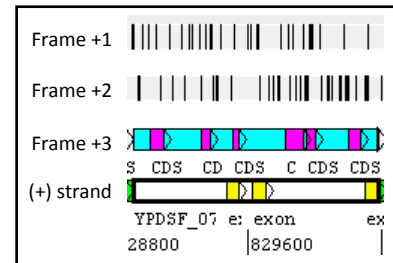

## Current sequence (peptide evidence in red): 487aa

MKPRMEYAPEFDNSYARQLSGFYTRLQPTPLKGARLLYHKSPLAQELGLDAHWFTEPKTAVWAGEALLPGMEPLAQVYSGHQFGMWAGQLGDGRGILLGEQRLNDGRYMDWHLKGAG  
LTPYSRMGDGRAVLRVIREFLASEALHHLGIPTSRALTIIVTSDHPIYREQTERGAMLLRVAESHIRFGHFEHFYRQQPKQVQQLADYVIARHWPQVWGHQECYRLWFTDVVERTARLMA  
HWQTVGFAHGVMMNTDNMSILGITMDYGPFGFLDDYVPGYICNHSDHQGRYAYDNQPAVALWNLHRLGHALSGLMSADQLQALEAYEPALMVAYGEQMRRAKLGFLERDSQDNDLLT  
GLLSLMIKEGRDYTRFRLLSEVEVHSAQSPLRDDFIDRAAFDDWYRRYRSRLQQESIDDDQRQQSMKAANPKYILRNYLAQQAITQAEKDDIQPLRHLQALQQPFTDQPEFDDLAALPPD  
WGHKLEISCS

Strain: *Y. pseudotuberculosis* PB1/+  
Gene: YPTS\_2396

Classification: annotated as hypothetical protein  
Boundaries of gene: complement (2660170..2661633)

## Oligo evidence:

tttcagcatttctactatcggcagcaacctaaagcaagtcaacaattagcggattatgttattgccgc  
gcaaacctcgggtttgctcatgggtgatgaataccgataatgtcaattctggcattactatggat  
ctgaatttgatgatttagcggcgttaccgccagattggggaaaaacacctcgagatctctgttccagctg

## Peptide evidence:

DSQDNDLLTGLLSLMIK  
LGHALSGLMSADQLQALEAYEPALMVAYGEQMR  
LQQESIDDDQR

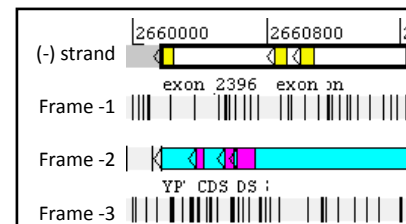

## Current sequence (peptide evidence in red): 487aa

MKPRMEYAPEFDNSYARQLSGFYTRLQPTPLKGARLLYHKSPLAQELGLDAHWFTEPKTAVWAGEALLPGMEPLAQVYSGHQFGMWAGQLGDGRGILLGEQRLNDGRYMDWHLKGAG  
LTPYSRMGDGRAVLRVIREFLASEALHHLGIPTSRALTIIVTSDHPIYREQTERGAMLLRVAESHIRFGHFEHFYRQQPKQVQQLADYVIARHWPQVWGHQECYRLWFTDVVERTARLMA  
HWQTVGFAHGVMMNTDNMSILGITMDYGPFGFLDDYVPGYICNHSDHQGRYAYDNQPAVALWNLHRLGHALSGLMSADQLQALEAYEPALMVAYGEQMRRAKLGFLERDSQDNDLLT  
GLLSLMIKEGRDYTRFRLLSEVEVHSAQSPLRDDFIDRAAFDDWYRRYRSRLQQESIDDDQRQQSMKAANPKYILRNYLAQQAITQAEKDDIQPLRHLQALQQPFTDQPEFDDLAALPPD  
WGHKLEISCS

# Error 25

Strain: *Y. pestis* CO92  
Gene: YPO2570

Classification: expressed pseudogene  
Boundaries of gene: 288536..2885790

## Oligo evidence:

gtcagtgctgaagtcgatcatgttgacctcggttccgcaaaaggtacgccaagcgatatctttatcgta

## Peptide evidence:

DIAEQLVAQAVGGK

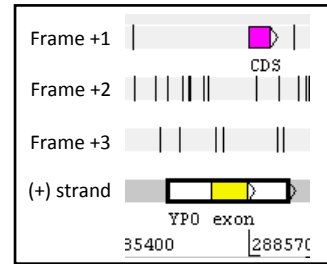

Proposed sequence (peptide evidence in red): 84aa

MKITVVCNGNLGTSLMMEISIKSILKELAVSAEVDHVDLGSAGKTPSDIFIGTKDIAEQLVAQAVGGKIVALDNMIDKKARACP

Strain: *Y. pestis* pestoides F  
Gene: YPDSF\_1977

Classification: hypothetical protein  
Boundaries of gene: 2235695..2235982

## Oligo evidence:

gtcagtgctgaagtcgatcatgttgacctcggttccgcaaaaggtacgccaagcgatatctttatcgta

## Peptide evidence:

DIAEQLVAQAVGGK  
GTPSDIFIGTKDIAEQLVAQAVGGK  
LSAALTELGAL

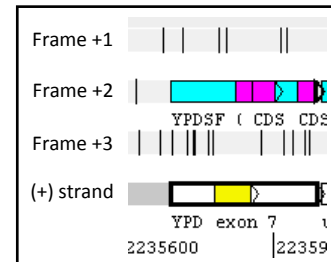

Current sequence (peptide evidence in red): 95aa

MKITVVCNGNLGTSLMMEISIKSILKELAVSAEVDHVDLGSAGKTPSDIFIGTKDIAEQLVAQAVGGKIVALDNMIDKKAMKERLSAALTELGAL

Strain: *Y. pseudotuberculosis* PB1/+  
Gene: YPTS\_2695

Classification: phosphotransferase system lactose/cellobiose-specific IIB subunit  
Boundaries of gene: 2995345..2995632

## Oligo evidence:

gtcagtgctgaagtcgatcatgttgacctcggttccgcaaaaggtacgccaagcgatatctttatcgta

## Peptide evidence:

DIAEQLVAQAVGGK  
GTPSDIFIGTKDIAEQLVAQAVGGK  
IVALDNMIDKK  
LSAALTELGAL  
SILKELAVSAEVDHVDLGSAGK

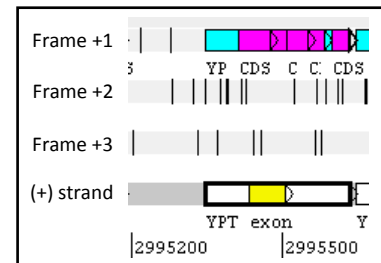

Current sequence (peptide evidence in red): 95aa

MKITVVCNGNLGTSLMMEISIKSILKELAVSAEVDHVDLGSAGKTPSDIFIGTKDIAEQLVAQAVGGKIVALDNMIDKKAMKERLSAALTELGAL

# Error 26

Strain: Y. pestis CO92  
Gene: YPO2644

Classification: expressed pseudogene  
Boundaries of gene: 2970789..2971556

Oligo evidence:

gggtggtgttcgcgctcaagagattgaggagcattgggttaaacatcaccctttgaaggtatcaat

Peptide evidence:

VFGVAMALERNPLIVEAIKCAGYDVVCHGWR

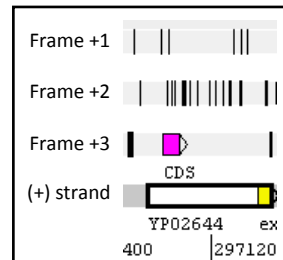

Proposed sequence (peptide evidence in red): 255aa

VWITIAPFVTHMSMESLYEGTRAGFWRIHQEFVSRGLPMT**VFGVAMALERNPLIVEAIKCAGYDVVCHGWR**WLHYQHVDQTEREHMQRAIKILHDLFGQPPAGWYTGRDSPNTRRLV  
VENGHLLYDSDYYGDDLFWFSQVRGVDGSTTPHLVVPYTLDANDMRFASAQGFNSSEQFYTYLKDSFDVLYAEGETAPKMMMSVGMHCRLLGRPGRFRALQRFLDYIQQHERVWVCRQEQ  
IAEHVWKHHPFEGINGR

Strain: Y. pestis pestoides F  
Gene: YPDSF\_1628

Classification: annotated as hypothetical protein  
Boundaries of gene: complement (1823526..1824476)

Oligo evidence:

aaataacgttctacatggcggatgctgaacaattcttccgatattatcggtgagcagttat  
gggtggtgttcgcgctcaagagattgaggagcattgggttaaacatcaccctttgaaggtatcaat

Peptide evidence:

DSFDVLYAEGETAPK  
DLAGYGGQPPVANWPGQAR  
RQEIAEHVVK

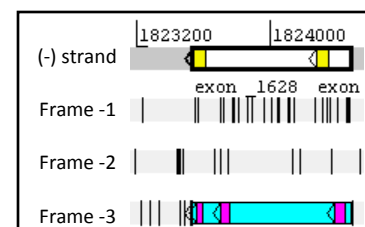

Current sequence (peptide evidence in red): 316aa

MHETELNHDIYPR**DLAGYGGQPPVANWPGQAR**IAVQFVLNIEEGAENNVLHGDAGSEQFLSDIIGADSYDRHMSMESLYEGTRAGFWRIHQEFVSRGLPMTVFGVAMALERNPLIVEAI  
KCAGYDVVCHGWRWLHYQHVDQTEREHMQRAIKILHDLFGQPPAGWYTGRDSPNTRRLVVENGHLLYDSDYYGDDLFWFSQVRGVDGSTTPHLVVPYTLDANDMRFASAQGFNSSE  
QFYTYLK**DSFDVLYAEGETAPK**MMSVGMHCRLLGRPGRFRALQRFLDYIQQHERVWVCR**RQEIAEHVVK**HHPFEGINGR

Strain: Y. pseudotuberculosis PB1/+  
Gene: YPTS\_3080

Classification: annotated as urate catabolism protein  
Boundaries of gene: complement (3408841..3409791)

Oligo evidence:

aaataacgttctacatggcggatgctgaacaattcttccgatattatcggtgagcagttat  
gggtggtgttcgcgctcaagagattgaggagcattgggttaaacatcaccctttgaaggtatcaat

Peptide evidence:

DLAGYGGQPPVANWPGQAR  
RQEIAEHVVK

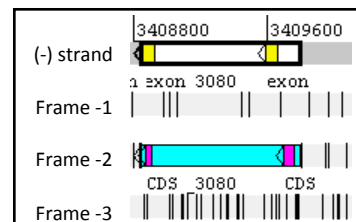

Current sequence (peptide evidence in red): 316aa

MHETELNHDIYPR**DLAGYGGQPPVANWPGQAR**IAVQFVLNIEEGAENNVLHGDAGSEQFLSDIIGADSYDRHMSMESLYEGTRAGFWRIHQEFVSRGLPMTVFGVAMALERNPLIVEAI  
KCAGYDVVCHGWRWLHYQHVDQTEREHMQRAIKILHDLFGQPPAGWYTGRDSPNTRRLVVENGHLLYDSDYYGDDLFWFSQVRGVDGSTTPHLVVPYTLDANDMRFASAQGFNSSE  
QFYTYLK**DSFDVLYAEGETAPK**MMSVGMHCRLLGRPGRFRALQRFLDYIQQHERVWVCR**RQEIAEHVVK**HHPFEGINGR

# Error 27

Strain: *Y. pestis* CO92  
Gene: YPO2698

Classification: expressed pseudogene  
Boundaries of gene: 3026599..3027255

## Oligo evidence:

ttagaaccaccggtaacattagccagccagcaacggattggggcttagctgatcgctaattcatcatg  
tgttaatccagtggcgatgccaccgacctattgcgacctggggataatgtgccttctgccgctaaa

## Peptide evidence:

DITIPVMYGGEVGPLADVAR  
LVVAPGSVIGGSQTGIYPLATPGGW  
PVMYGGEVGPLADVAR

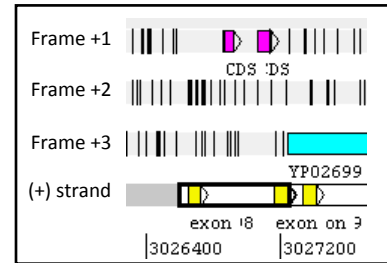

Proposed sequence (peptide evidence in red): 218aa

VQRARCYLLGESAVVLELEPPVTLASQRIWGLADRLIHHADILEVIPGMNNLTLLLADPHNTALDAIERLQRWWEESLIPESRDITIPVMYGGEVGPLADVARHTGM SERQVVECHAG  
ARYIVYFLGFQPGFSYLGGMPEQLATPRRADPRLVVAPGSVIGGSQTGIYPLATPGGW+LIGRTSLALFNPVAMPPTLLRPGDNVRFPLKEGVC

Strain: *Y. pestis* pestoides F  
Gene: YPDSF\_1573

Classification: hypothetical protein  
Boundaries of gene: complement (1769395..1769940)

## Oligo evidence:

ttagaaccaccggtaacattagccagccagcaacggattggggcttagctgatcgctaattcatcatg

## Peptide evidence:

DITIPVMYGGEVGPLADVAR  
LIHHADILEVIPGMNNLTLLLADPHNTALDAIER  
PVMYGGEVGPLADVAR  
WWEESLIPESR

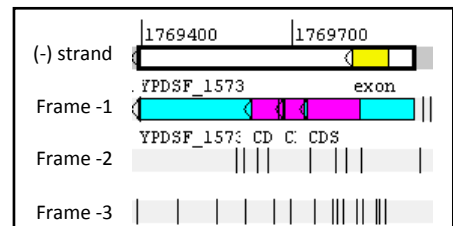

Current sequence (peptide evidence in red): 181aa

VQRARCYLLGESAVVLELEPPVTLASQRIWGLADRLIHHADILEVIPGMNNLTLLLADPHNTALDAIERLQRWWEESLIPESRDITIPVMYGGEVGPLADVARHTGM SERQVVECHAG  
ARYIVYFLGFQPGFSYLGGMPEQLATPRRADPRLVVAPGSVIGGSQTGIYPLATPGGW

Strain: *Y. pseudotuberculosis* PB1/+  
Gene: YPTS\_3023

Classification: allophanate hydrolase subunit 1  
Boundaries of gene: complement (3353932..3354588)

## Oligo evidence:

tgttaatccagtggcgatgccaccgacctattgcgacctggggataatgtgccttctgccgctaaa  
ttagaaccaccggtaacattagccagccagcaacggattggggcttagctgatcgctaattcatcatg

## Peptide evidence:

DITIPVMYGGEVGPLADVAR  
IPVMYGGEVGPLADVAR  
LIHHADILEVIPGMNNLTLLLADPHNTALDAIER  
LVVAPGSVIGGSQTGIYPLATPGGWQLIGR  
PVMYGGEVGPLADVAR  
TSLALFNPVAMPPTLLRPGDNVR  
WWEESLIPESR

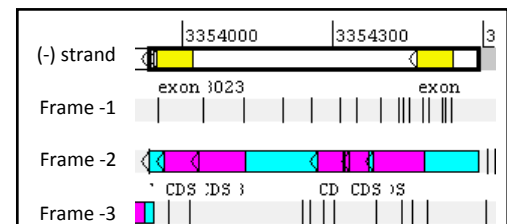

Current sequence (peptide evidence in red): 218aa

VQRARCYLLGESAVVLELEPPVTLASQRIWGLADRLIHHADILEVIPGMNNLTLLLADPHNTALDAIERLQRWWEESLIPESRDITIPVMYGGEVGPLADVARHTGM SERQVVECHAG  
ARYIVYFLGFQPGFSYLGGMPEQLATPRRADPRLVVAPGSVIGGSQTGIYPLATPGGWQLIGRTSLALFNPVAMPPTLLRPGDNVRFPLKEGVC

# Error 28

Strain: Y. pestis CO92  
Gene: YPO2909

Classification: expressed pseudogene  
Boundaries of gene: Frame+1: 3252487..3253062  
Frame+2:3253064..3253420

## Oligo evidence:

acataaggctagatcggttacatcatgagtaaaagattcataaaaaagaagggttagcattagtctctat  
ttaaaactattgatgatctatcaggtgatttggatttcagtcggttgattcaacacgccttgaaggt  
aaaaatccgcccgggtgggttggactcagttcacctgatcaatgtttattgactgaaattaagtttggc

## Peptide evidence:

EGLALVSMAR  
EGLASGLKEQFTLLPLYFAHMR  
EQFTLLPLYFAHMR  
GSYVDGHQLIFR  
TIDDLSGDFGISVGVQIHALK  
AVQSGIVEPR  
GDIDAVIWNQEIVPSEYLQSIK

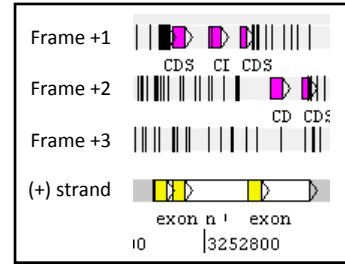

## Proposed sequence (peptide evidence in red):

Frame+1: 192aa

MPGNIRLDRIYIMSKRFIKK**EGLALVSMARYLIGERSGNRLKTIDDLSGDFGISVGVQIHALK**VLEADGAIVVERRRNGTRLLDLNMTLLLQADLGNMVCAMPLPYTKLY**EGLASGLKEQFTLLPLYFAHMR**GAEVRIECLIDGVYDMAVVSHLAAKNYLKQEKVTLALNLGR**GSYVDGHQLIFRR**GEQKK

Frame+2: 118aa

IRRVGFDSRSPDQCLLTEIKFAGQPIERVELSYSNCIPHILIR**GDIDAVIWNQEIVPSEYLQSIK**LQGDERYIQASQAVILIRPDNYPIKLLLERGINQTQLLRHQR**AVQSGIVEPRY**

Strain: Y. pestis pestoides F  
Gene: YPDSF\_2255

Classification: hypothetical protein  
Boundaries of gene: 2554072..2554971

## Oligo evidence:

acataaggctagatcggttacatcatgagtaaaagattcataaaaaagaagggttagcattagtctctat  
ttaaaactattgatgatctatcaggtgatttggatttcagtcggttgattcaacacgccttgaaggt  
aaaaatccgcccgggtgggttggactcagttcacctgatcaatgtttattgactgaaattaagtttggc

## Peptide evidence:

EGLALVSMAR  
LYEGLASGLKEQFTLLPLYFAHMR  
TIDDLSGDFGISVGVQIHALK  
AVQSGIVEPR  
GDIDAVIWNQEIVPSEYLQSIK  
GINQTQLLR  
GSYVDGHQLIFR  
YIQASQAVILIRPDNYPIK

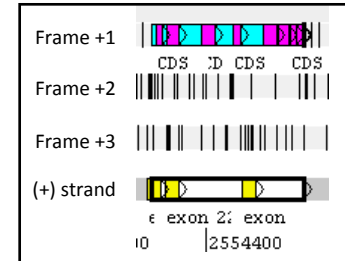

## Current sequence (peptide evidence in red): 299aa

MSKRFIKK**EGLALVSMARYLIGERSGNRLKTIDDLSGDFGISVGVQIHALK**VLEADGAIVVERRRNGTRLLDLNMTLLLQADLGNMVCAMPLPYTKLY**EGLASGLKEQFTLLPLYFAHMR**GAEVRIECLIDGVYDMAVVSHLAAKNYLKQEKVTLALNLGR**GSYVDGHQLIFRR**GEQKKIRRVGFDSRSPDQCLLTEIKFAGQPIERVELSYSNCIPHILIR**GDIDAVIWNQEIVPSEYLQSIK**LQGDERYIQASQAVILIRPDNYPIKLLLERGINQTQLLRHQR**AVQSGIVEPRY**

Strain: Y. pseudotuberculosis PB1/+  
Gene: YPTS\_2980

Classification: hypothetical protein  
Boundaries of gene: 3311014..3311946

## Oligo evidence:

acataaggctagatcggttacatcatgagtaaaagattcataaaaaagaagggttagcattagtctctat  
ttaaaactattgatgatctatcaggtgatttggatttcagtcggttgattcaacacgccttgaaggt  
aaaaatccgcccgggtgggttggactcagttcacctgatcaatgtttattgactgaaattaagtttggc  
tatcttatcccccagataactatccgatcaagctactgctggaagaggcattaaccaaacacagttta

## Peptide evidence:

VTLALNLGR

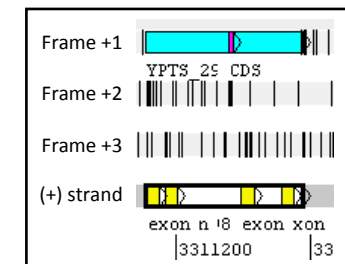

## Current sequence (peptide evidence in red): 310aa

LPGNIRLDRIYIMSKRFIKKEGLALVSMARYLIGERSGNRLKTIDDLSGDFGISVGVQIHALKLEADGAIVVERRRNGTRLLDLNMTLLLQADLGNMVCAMPLPYTKLYEGLASGLKEQFTLLPLYFAHMRGAEVRIECLIDGVYDMAVVSHLAAKNYLKQEK**VTLALNLGR**GSYVDGHQLIFRRGEQKKIRRVGFDSRSPDQCLLTEIKFAGQPIERVELSYSNCIPHILIRGDIDAVIWNQEIVPSEYLQSIKLGQDERYIQASQAVILIRPDNYPIKLLLERGINQTQLLRHQR**AVQSGIVEPRY**

# Error 29

Strain: *Y. pestis* CO92  
Gene: YPO3207

Classification: expressed pseudogene  
Boundaries of gene: 3570770..3574477

## Oligo evidence:

aacacaacacgtacagcaatatcagcagcaacagggtcgttggagcaagatgtaacagcactacc  
aatttgagcctactgtgaaaaacattaactcattacagggcgaatggaagatagatttactgcccga

## Peptide evidence:

IVPLDNLITQQQQLSGLAGQIQQLR  
LQQQAELAQQNAEK  
SSELTLLQQQSEQLLAQLK  
TSIDSLFLDEGFGTLDAETLDTALDALDSLNASGK

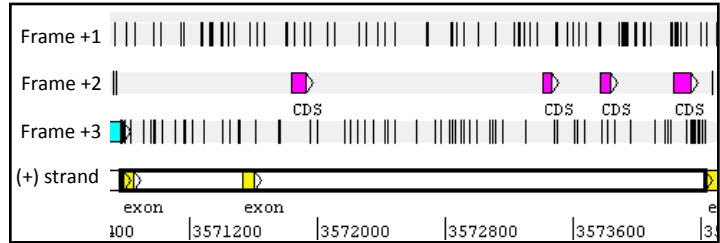

Proposed sequence (peptide evidence in red): 1235aa

MKILSLRLKNINSLQGEWKIDFTAEPFASNGLFAITGPTGAGKTTLLDAICLALYHQTPRLIVTPSQNELMTRHTAESLAEVEFDVKGIRYRAFVWSQRRARNSPDGNLQAPKVELALCENKILADKVRDKLDMIAAITGLDF  
GRFTKSMMLSSGQFAAFNLADANDRAELLELEFGTDIYGRSLSERVFEKHKQAKIDLDALHQRASGIELLNEEQRLALAQIDALSQQEQQLSKEQLVTVNQINWLTGWQQQQHVQQYQQQQLVVEQEYQALPG  
LQRLARSEPAEKLRPLQRERDRSQKDLQQTQRITALAQQQQYLAQLTPTLQAVEQATAARQQQLNQHEQETLIEQRIVPLDNLITQQQQLSGLAGQIQQLRAKEQQNSQQLALNEQKLLQTHQRLQQLADYA  
NLHAHHQHWEKHLPLWHEQFRQLLQQQQAQSEQLHQQTLLATLQQQATTLSAQEKQQQVALAEARAQASYLQKLLVLEQQQPSAQLRQQLNEFNEQRQICQLAALSPLAQIQALYDKQQQFFAQ  
QQQLKQLEQLTEKRQLYQQQKQHLVDEALLEREKQIVTLEAERAKLQPGDACPLCGAVEHPAITAYQAVKPSSETAVRVAKLRLQVEQLYETGTELRTQVASMQQHQQRIEQELQDHRQQLAAYQQRWQTLAQPL  
SLAFTLNEPDALALWLEQHEQQEQACQLKLYEYERLTQQYQQAQKIDLTQLEQRQEQHQQLALITERQKNAQQTYQLQSQYHQQEAALIAQQQVNLHHTLTELSSLVDPADQQQDWLAQREEECQRWQQHQQE  
QQRLTIEQKLTLETRIENRRHLQECIDQLSALSQRQQAETLLQQQIQQRALFGEDIVAERVQRRLRQQQAELAQQNAEKALQQQAQSNLRLSGELTGLEQQCQQYQQRATTTQAEELQALSTSEFADETALTAAL  
LSEERQHLQQLQQLNERRRQAQIRLQQAAREILDQHLQPCQGVGDKSSELTLLQQQSEQLLAQLKTTTLRQGLERNQLESDDTRRRHNQRTLFEQIERSQQQYDDWSYLNQLIGSKEGDKFRKFAQGLTLDHLVYLAN  
NQLSRLHGRYLLQRKTTDALELQVVDTWQADAIRDTRTSLGGESFLVSLALALALSDLVSHKTSIDSLFLDEGFGTLDAETLDTALDALDSLNASGKTIGVISHVEAMKDRIPVQIKVKKVNGLVGVCRRMKSPLSPPTA  
QY

Strain: *Y. pestis* pestoides F  
Gene: YPDSF\_2840

Classification: hypothetical protein  
Boundaries of gene: 3216993..3220682

## Oligo evidence:

aatttgagcctactgtgaaaaacattaactcattacagggcgaatggaagatagatttactgcccga  
cagataaaagtgaaaaaagttaacgggttagcgctagcggcttggataatgcctccgagtcactcaag

## Peptide evidence:

ALQQAQSQLNR  
IDFTAEPFASNGLFAITGPTGAGK  
IVPLDNLITQQQQLSGLAGQIQQLR  
KFAQGLTLDHLVYLANQLSR  
LQQQAELAQQNAEK  
TQVASMQQHQQR  
TSIDSLFLDEGFGTLDAETLDTALDALDSLNASGK

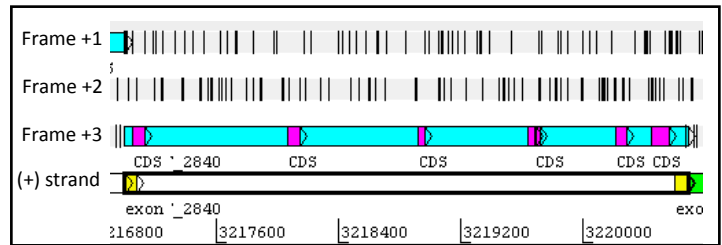

Current sequence (peptide evidence in red): 1229aa

MKILSLRLKNINSLQGEWKIDFTAEPFASNGLFAITGPTGAGKTTLLDAICLALYHQTPRLIVTPSQNELMTRHTAESLAEVEFDVKGIRYRAFVWSQRRARNSPDGNLQAPKVELALCENKILADKVRDKLDMIAAITGLDF  
GRFTKSMMLSSGQFAAFNLADANDRAELLELEFGTDIYGRSLSERVFEKHKQAKIDLDALHQRASGIELLNEEQRLALAQIDALSQQEQQLSKEQLVTVNQINWLTGWQQQQHVQQYQQQQLVVEQEYQALPG  
LQRLARSEPAEKLRPLQRERDRSQKDLQQTQRITALAQQQQYLAQLTPTLQAVEQATAARQQQLNQHEQETLIEQRIVPLDNLITQQQQLSGLAGQIQQLRAKEQQNSQQLALNEQKLLQTHQRLQQLADYA  
NLHAHHQHWEKHLPLWHEQFRQLLQQQQAQSEQLHQQTLLATLQQQATTLSAQEKQQQVALAEARAQASYLQKLLVLEQQQPSAQLRQQLNEFNEQRQICQLAALSPLAQIQALYDKQQQFFAQ  
QQQLKQLEQLTEKRQLYQQQKQHLVDEALLEREKQIVTLEAERAKLQPGDACPLCGAVEHPAITAYQAVKPSSETAVRVAKLRLQVEQLYETGTELRTQVASMQQHQQRIEQELQDHRQQLAAYQQRWQTLAQPL  
SLAFTLNEPDALALWLEQHEQQEQACQLKLYEYERLTQQYQQAQKIDLTQLEQRQEQHQQLALITERQKNAQQTYQLQSQYHQQEAALIAQQQVNLHHTLTELSSLVDPADQQQDWLAQREEECQRWQQHQQE  
QQRLTIEQKLTLETRIENRRHLQECIDQLSALSQRQQAETLLQQQIQQRALFGEDIVAERVQRRLRQQQAELAQQNAEKALQQQAQSNLRLSGELTGLEQQCQQYQQRATTTQAEELQALSTSEFADETALTAAL  
LSEERQHLQQLQQLNERRRQAQIRLQQAAREILDQHLQPCQGVGDKSSELTLLQQQSEQLLAQLKTTTLRQGLERNQLESDDTRRRHNQRTLFEQIERSQQQYDDWSYLNQLIGSKEGDKFRKFAQGLTLDHLVYLAN  
NQLSRLHGRYLLQRKTTDALELQVVDTWQADAIRDTRTSLGGESFLVSLALALALSDLVSHKTSIDSLFLDEGFGTLDAETLDTALDALDSLNASGKTIGVISHVEAMKDRIPVQIKVKKVNGLVGVRDLNFRVNDQ

Strain: *Y. pseudotuberculosis* PB1/+  
Gene: YPTS\_0956

Classification: SMC domain-containing protein  
Boundaries of gene: complement (1083806..1087495)

## Oligo evidence:

cagataaaagtgaaaaaagttaacgggttagcgctagcggcttggataatgcctccgagtcactcaag  
aatttgagcctactgtgaaaaacattaactcattacagggcgaatggaagatagatttactgcccga

## Peptide evidence:

IDFTAEPFASNGLFAITGPTGAGK  
IVPLDNLITQQQQLSGLAGQIQQLR  
LQQQAELAQQNAEK  
LTQQYQQAQK  
TSIDSLFLDEGFGTLDAETLDTALDALDSLNASGK

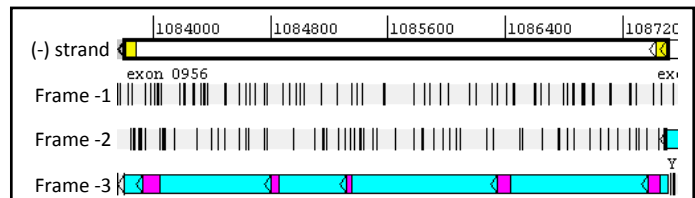

Current sequence (peptide evidence in red): 1229aa

MKILSLRLKNINSLQGEWKIDFTAEPFASNGLFAITGPTGAGKTTLLDAICLALYHQTPRLIVTPSQNELMTRHTAESLAEVEFDVKGIRYRAFVWSQRRARNSPDGNLQAPKVELALCENKILADKVRDKLDMIAAITGLDF  
GRFTKSMMLSSGQFAAFNLADANDRAELLELEFGTDIYGRSLSERVFEKHKQAKIDLDALHQRASGIELLNEEQRLALAQIDALSQQEQQLSKEQLVTVNQINWLTGWQQQQHVQQYQQQQLVVEQEYQALPG  
LQRLARSEPAEKLRPLQRERDRSQKDLQQTQRITALAQQQQYLAQLTPTLQAVEQATAARQQQLNQHEQETLIEQRIVPLDNLITQQQQLSGLAGQIQQLRAKEQQNSQQLALNEQKLLQTHQRLQQLADYA  
NLHAHHQHWEKHLPLWHEQFRQLLQQQQAQSEQLHQQTLLATLQQQATTLSAQEKQQQVALAEARAQASYLQKLLVLEQQQPSAQLRQQLNEFNEQRQICQLAALSPLAQIQALYDKQQQFFAQ  
QQQLKQLEQLTEKRQLYQQQKQHLVDEALLEREKQIVTLEAERAKLQPGDACPLCGAVEHPAITAYQAVKPSSETAVRVAKLRLQVEQLYETGTELRTQVASMQQHQQRIEQELQDHRQQLAAYQQRWQTLAQPL  
SLAFTLNEPDALALWLEQHEQQEQACQLKLYEYERLTQQYQQAQKIDLTQLEQRQEQHQQLALITERQKNAQQTYQLQSQYHQQEAALIAQQQVNLHHTLTELSSLVDPADQQQDWLAQREEECQRWQQHQQE  
QQRLTIEQKLTLETRIENRRHLQECIDQLSALSQRQQAETLLQQQIQQRALFGEDIVAERVQRRLRQQQAELAQQNAEKALQQQAQSNLRLSGELTGLEQQCQQYQQRATTTQAEELQALSTSEFADETALTAAL  
LSEERQHLQQLQQLNERRRQAQIRLQQAAREILDQHLQPCQGVGDKSSELTLLQQQSEQLLAQLKTTTLRQGLERNQLESDDTRRRHNQRTLFEQIERSQQQYDDWSYLNQLIGSKEGDKFRKFAQGLTLDHLVYLAN  
NQLSRLHGRYLLQRKTTDALELQVVDTWQADAIRDTRTSLGGESFLVSLALALALSDLVSHKTSIDSLFLDEGFGTLDAETLDTALDALDSLNASGKTIGVISHVEAMKDRIPVQIKVKKVNGLVGVRDLNFRVNDQ

# Error 30

Strain: Y. pestis CO92

Gene: YPO3370

Oligo evidence:

gtggagggtattgagcgttataacaacctcaataaagtgaaccaatgaatcggcgctggagcgtttag  
aatcccaagtttatcaatacctcacacaacatggcctgagttatcaccactgtgggaacaaggttatt

Peptide evidence:

QRPDIPVILTDGTGYLFPETYR  
YNNLNKVEPMNR

Proposed sequence (peptide evidence in red):

Frame-1: 154aa

VSQFNLSLNLALPKAKQAAALVLVNGQLEHLTAQERVSWALDNLPGFEVLSSSFQIAAVCLHLVTR**QRPDIPVILTDGTGYLFPETYR**FIDDLTEKLQNLQVFRAAHSPAWQEARYGKLWEQ  
GVEGIER**YNNLNKVEPMNR**RALEALGAQTWFA

Frame-3: 90aa

GLRREQSGGRSQLPVLALQRGIFKLLPIIDWDRQVYQYLTHGLSYHPLWEQGYLSVGDTHTRKWEPGMSEETRRFFGLKRECLHEG

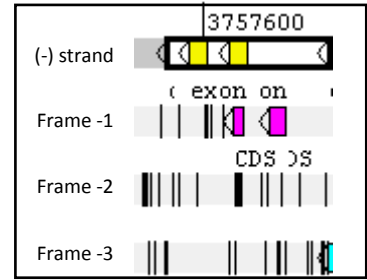

Strain: Y. pestis pestoides F

Gene: YPDSF\_2989 / YPDSF\_2990

Oligo evidence:

gtggagggtattgagcgttataacaacctcaataaagtgaaccaatgaatcggcgctggagcgtttag  
aatcccaagtttatcaatacctcacacaacatggcctgagttatcaccactgtgggaacaaggttatt

Peptide evidence:

AAHSPAWQEAR  
QRPDIPVILTDGTGYLFPETYR  
KWEPGMSEETR  
QVYQYLTHGLSYHPLWEQGYLSVGDTHTR

Current sequence (peptide evidence in red):

Frame2: 154aa

VSQFNLSLNLALPKAKQAAALVLVNGQLEHLTAQERVSWALDNLPGFEVLSSSFQIAAVCLHLVTR**QRPDIPVILTDGTGYLFPETYR**FIDDLTEKLQNLQVFR**AAHSPAWQEAR**YGKLWEQ  
GVEGIER**YNNLNKVEPMNR**RALEALGAQTWFA

Frame3: 90aa

GLRREQSGGRSQLPVLALQRGIFKLLPIIDWDRQVYQYLTHGLSYHPLWEQGYLSVGDTHTRKWEPGMSEETRRFFGLKRECLHEG

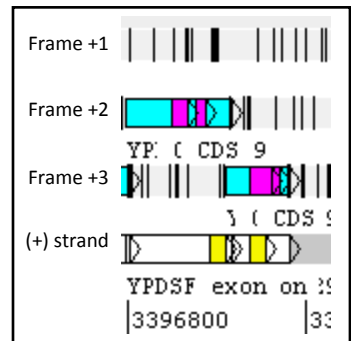

Strain: Y. pseudotuberculosis PB1/+

Gene: YPTS\_0794

Oligo evidence:

gtttatcaatacctcacacaacatggcctgagttatcaccactgtgggagcaaggttactatctctgc

Peptide evidence:

AAHSPAWQEAR  
AKQAAALVLVNGQLEHLTAQER  
ALEALGAQTWFAGLR  
KWEPGMSEETR  
KWEPGMSEETR  
LLPIIDWDR  
LQLNLQVFR  
LWEQVEGIER  
QAAALVLVNGQLEHLTAQER  
QRPDIPVILTDGTGYLFPETYR  
QVYQYLTHGLSYHPLWEQGYLSVGDTHTR  
RALEALGAQTWFAGLR  
SQFNLSLNLALPK  
SQLPVLALQR  
YLTQHGLSYHPLWEQGYLSVGDTHTR  
YNTLNKVEPMNR  
YNTLNKVEPMNR

Current sequence (peptide evidence in red): 244aa

VSQFNLSLNLALPKAKQAAALVLVNGQLEHLTAQERVSWALDNLPGFEVLSSSFQIAAVCLHLVTR**QRPDIPVILTDGTGYLFPETYR**FIDDLTEKLQNLQVFR**AAHSPAWQEAR**YGKLWEQ  
GVEGIER**YNTLNKVEPMNR**RALEALGAQTWFAGLRREQSGGRSQLPVLALQRGIFKLLPIIDWDRQVYQYLTHGLSYHPLWEQGYLSVGDTHTRKWEPGMSEETRRFFGLKRECLHEG

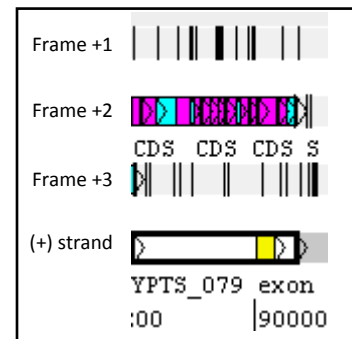

# Error 31

Strain: *Y. pestis* CO92  
Gene: YPO3544

Classification: expressed pseudogene  
Boundaries of gene: 3952284..3953225

Oligo evidence:

ctaacggaagctgattacggttatggactacgctagtcgctttgatccgggtatgtgacgcattcca

Peptide evidence:

AGFATTQEAYDEAVGTLFSALDR

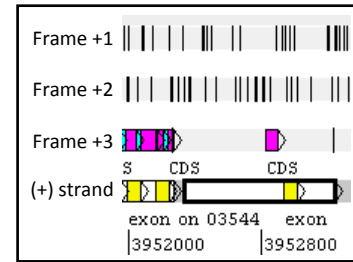

Proposed sequence (peptide evidence in red): 313aa

MGRWWRYKWITFHPSLTTDGGQAGPQGGKFNAEAHRYHLYVSLACPWAHRALLMRTLKGLLESLISVSVVHPLMQENGWTFSSDFPAATGDALYHLDYLYQLYLRAPDYSGRVTVPLWDKQQQTVVSNESADIIRMFNNAFDVGAAGDYPTALRNDIDDINGWVYDQVNNGVYK**AGFATTQEAYDEAVGTLFSALDR**LEQLIGQHRYLTGNQLTEADLRLWTTLVRFDPVYVTHFKCDKRRISDYPNLYGFLRDIYQMPGIAETVDFAHIRTHYYRSHGTSILMGLSLSAHSKTCWWSHMIGRIALYKN

Strain: *Y. pestis pestoides* F  
Gene: YPDSF\_0353

Classification: hypothetical protein  
Boundaries of gene: complement (395973..396959)

Oligo evidence:

ctaacggaagctgattacggttatggactacgctagtcgctttgatccgggtatgtgacgcattcca  
ctcatcaatggcgtctggaagacgtttggtacgacaccaatcgaccggtggcattccaacgctcaa

Peptide evidence:

AGFATTQEAYDEAVGTLFSALDR  
SHGTINPYGIISIGPQQNLEPHDR

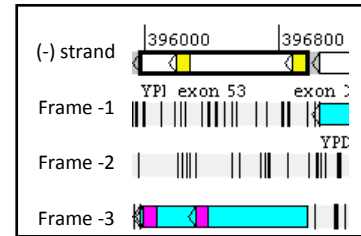

Current sequence (peptide evidence in red): 328aa

MGQLINGVWKDVWYDTQSTGGHFKRSTAQFRNWVTTDGGQAGPQGGKFNAEAHRYHLYVSLACPWAHRALLMRTLKGLLESLISVSVVHPLMQENGWTFSSDFPAATGDALYHLDYLYQLYLRAPDYSGRVTVPLWDKQQQTVVSNESADIIRMFNNAFDVGAAGDYPTALRNDIDDINGWVYDQVNNGVYK**AGFATTQEAYDEAVGTLFSALDR**LEQLIGQHRYLTGNQLTEADLRLWTTLVRFDPVYVTHFKCDKRRISDYPNLYGFLRDIYQMPGIAETVDFAHIRTHYYR**SHGTINPYGIISIGPQQNLEPHDR**ANRFV

Strain: *Y. pseudotuberculosis* PB1/+  
Gene: YPTS\_3674

Classification: putative glutathione S-transferase  
Boundaries of gene: 4093874..4094860

Oligo evidence:

ctcatcaatggcgtctggaagacgtttggtacgacaccaatcgaccggtggcattccaacgctcaa  
ctaacggaagctgattacggttatggactacgctagtcgctttgatccgggtatgtgacgcattcca

Peptide evidence:

NA

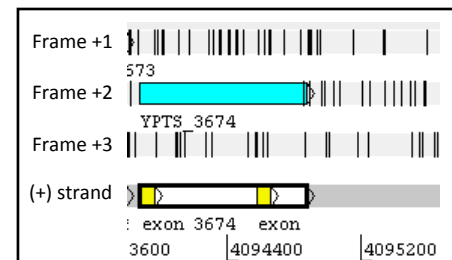

Current sequence (peptide evidence in red): 328aa

MGQLINGVWKDVWYDTQSTGGHFKRSTAQFRNWVTTDGGQAGPQGGKFNAEAHRYHLYVSLACPWAHRALLMRTLKGLLESLISVSVVHPLMQENGWTFSSDFPAATGDALYHLDYLYQLYLRAPDYSGRVTVPLWDKQQQTVVSNESADIIRMFNNAFDVGAAGDYPTALRNDIDDINGWVYDQVNNGVYK**AGFATTQEAYDEAVGTLFSALDR**LEQLIGQHRYLTGNQLTEADLRLWTTLVRFDPVYVTHFKCDKRRISDYPNLYGFLRDIYQMPGIAETVDFAHIRTHYYRSHGTINPYGIISIGPQQNLEPHDRANRFV



# Error 32

Strain: Y. pestis CO92  
Gene: YPO3687

Classification: expressed pseudogene  
Boundaries of gene: Frame+1: 4122382..4123473  
Frame+3:4123473..4123850

Oligo evidence:  
aacatggggccgttgattaattggctggtctggagaaagtagaagagcagcgtaaaagatgcgcttgaga  
tcaatgaatgctcggtttcgaccgagttggcccttctggtggttaagagctgcctaggtctgta

Peptide evidence:  
EPIGVVAAITPWNFPLAMLTR  
FYIQDAIYDEFVNR  
KISFTGSTNVGK  
PAQNPLQHQR  
QHDGIYHIGYFVGGK  
VEEHVKDALEK  
VEEHVKDALEKGGGR  
WAVISSSQR  
WSQAQEQFDVYNPATGELVAR

Sequence (peptide evidence in red):  
Frame+1: 377aa

MPAQNPLQHQR**QHDGIYHIGYFVGGKWSQAQEQFDVYNPATGELVAR**VAKSGKQETEAAIKAASEAFPWRKTPAKQRAEILQRWYLLIMEHQQSLAELMVSEQGKPLKEALVEVAYAA  
SFIQWFSEQAQRANGEEIIPSAKEGARILATRE**EPIGVVAAITPWNFPLAMLTR**KLGPALAAAGCTGLIKPANNTPLSAFALLALAEQAGVPAGVLNGVVDGTHAISDAIMASSDVR**KISFTGSTNV**  
**GKTLMRNAAATMKRISMELGGNAPYIVFDDADLEAAVAGAMACKFRNAGQVCVGNR****FYIQDAIYDEFVNR**LAAEVKLLKVGNGMDKDVNMGPLINLAGLEK**VEEHVKDALEKGGRLLA**  
GGIAMRWAVISSSQR

Frame+3: 125aa

HRHALGGNFFQPTVIADANEQMKVASEETFGPLAACFRFSTEA EIQRANNTPFGLAAYFYTQNLQRVFRVSEALESGMIGVNECSVSTELAPFGGVKESGLGREGSVLGLDEFMEVKTLLH  
GNL

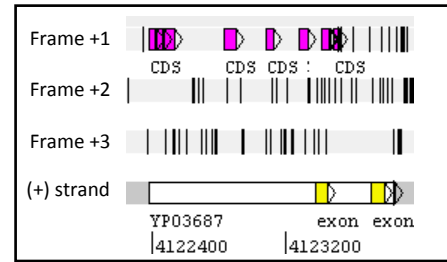

# Error 102

Strain: Y. pestis pestoides F  
Gene: YPDSF\_0294 and 0295

Classification: YPDSF\_0294 annotated as hypothetical protein  
**error:** YPDSF\_0295 annotated as succinate-semialdehyde dehydrogenase, upstream start site  
Boundaries of gene: YPDSF\_0294 Frame+1: 338206..339339  
YPDSF\_0295 Frame+3: 339336..339674

Oligo evidence:  
aacatggggccgttgattaattggctggtctggagaaagtagaagagcagcgtaaaagatgcgcttgaga  
tcaatgaatgctcggtttcgaccgagttggcccttctggtggttaagagctgcctaggtctgta

Peptide evidence:  
DVMNMGPLINLAGLEK KISFTGSTNVGK  
ISFTGSTNVGK QHDGIYHIGYFVGGK  
VEEHVKDALEK WAVISSSQR  
VGNMGMDKDVNMGPLINLAGLEK ANNTPFGLAAYFYTQ  
WSQAQEQFDVYNPATGELVAR ANNTPFGLAAYFYTQNLQR  
EPIGVVAAITPWNFPLAMLTR FSTEA EIQR  
FYIQDAIYDEFVNR HALGGNFFQPTVIADANEQMK

Proposed sequence (peptide evidence in red):  
Frame+1: 377aa (YPDSF\_0294)

MPAQNPLQHQR**QHDGIYHIGYFVGGKWSQAQEQFDVYNPATGELVAR**VAKSGKQETEAAIKAASEAFPWRKTPAKQRAEILQRWYLLIMEHQQSLAELMVSEQGKPLKEALVEVAYAA  
SFIQWFSEQAQRANGEEIIPSAKEGARILATRE**EPIGVVAAITPWNFPLAMLTR**KLGPALAAAGCTGLIKPANNTPLSAFALLALAEQAGVPAGVLNGVVDGTHAISDAIMASSDVR**KISFTGSTNV**  
**GKTLMRNAAATMKRISMELGGNAPYIVFDDADLEAAVAGAMACKFRNAGQVCVGNR****FYIQDAIYDEFVNR**LAAEVKLLK**VGNMGMDKDVNMGPLINLAGLEK****VEEHVKDALEKGGRLLA**  
GGIAMRWAVISSSQR

Frame+3: 125aa (YPDSF\_0295)

Current sequence underlined

HR**HALGGNFFQPTVIADANEQMK**VASEETFGPLAACFR**FSTEA EIQRANNTPFGLAAYFYTQNLQR**VFRVSEALESGMIGVNECSVSTELAPFGGVKESGLGREGSVLGLDEFMEVKTLLH  
GNL

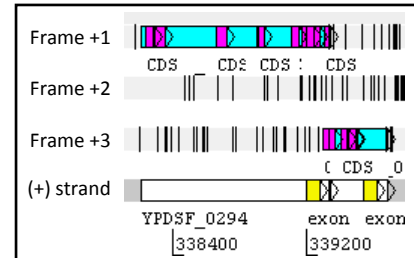

Strain: Y. pseudotuberculosis PB1/+  
Gene: YPTS\_3731

Classification: annotated as succinic semialdehyde dehydrogenase  
Boundaries of gene: complement (4150763..4152232)

Oligo evidence:  
tcaatgaatgctcggtttcgaccgagttggcccttctggtggttaagagctgcctaggtctgta

Peptide evidence:  
ANNTPFGLAAYFYTQ  
ANNTPFGLAAYFYTQNLQR  
EGSVLGLDEFMEVK  
EPIGVVAAITPWNFPLAMLTR  
FSTEA EIQR  
FYIQDAIYDEFVNR  
HALGGNFFQPTVIADANEQMK  
ISFTGSTNVGK  
QHDGIYHIGYFVGGK  
VEEHVKDALEK

Current sequence (peptide evidence in red): 489aa

MPAQNPLQHQR**QHDGIYHIGYFVGGKWSQAQEQFDVYNPATGELVAR**VAKSGKQETEAAIKAASEAFPWRKTPAKQRAEILQRWYLLIMEHQQSLAELMVSEQGKPLKEALVEVAYAA  
SFIQWFSEQAQRANGEEIIPSAKEGARILATRE**EPIGVVAAITPWNFPLAMLTR**KLGPALAAAGCTGLIKPANNTPLSAFALLALAEQAGVPAGVLNGVVDGTHAISDAIMASSDVR**KISFTGSTNV**  
**GKTLMRNAAATMKRISMELGGNAPYIVFDDADLEAAVAGAMACKFRNAGQVCVGNR****FYIQDAIYDEFVNR**LAAEVKLLKVGNGMDKDVNMGPLINLAGLEK**VEEHVKDALEKGGRLLA**  
GGHR**HALGGNFFQPTVIADANEQMK**VASEETFGPLAACFR**FSTEA EIQRANNTPFGLAAYFYTQNLQR**VRSRVSEALESGMIGVNECSVSTELAPFGGVKESGLGREGSVLGLDEFMEVKTLLH  
HLGNL

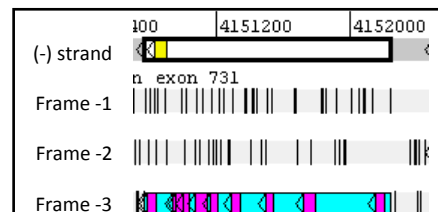

# Error 33

Strain: Y. pestis CO92  
Gene: YPO3723

Classification: expressed pseudogene (icLR)  
Boundaries of gene: Frame+1: 4167025:4167291  
Frame+3:4167294:4167869

Oligo evidence:

acataaaaaggggttcacgcttacaccagcacaccgtaccaatccaaccagcctgaaagaaaatcta

Peptide evidence:

AATQNTPAATGQVQSLTR

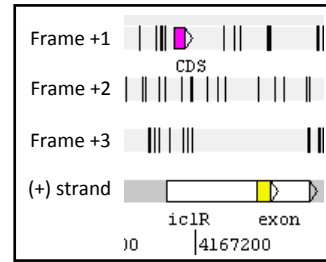

Proposed sequence (peptide evidence in red):

Frame+1: 89aa

MALPIPIKRGKKPK**AATQNTPAATGQVQSLTR**GLKLEIYSESDGNVALTDLAQQAGLPNSTHRLTTMQQGFVRQVGDGLGLWTMGA

Frame+3: 191aa

HAFIVGSSFLQSRNLLAMVHPMLRRLMDESGETVNLAVLDHSDYQAIIDQVQCTALMRMSAPIGGKLPMHASGAGKAFSLTLPDDQLVQLLHKKGLHAYTQHTRTNPTSLKENLALIRKQGYSDDEEHALGLRCAIAACLFDEHHEFAAISISGPISRITDDRVTGALVIHAAKEITQSYGGGTGVK

Strain: Y. pestis pestoides F  
Gene: YPDSF\_0176

Classification: transcriptional repressor IclR  
Boundaries of gene: complement (185391..186233)

Oligo evidence:

acataaaaaggggttcacgcttacaccagcacaccgtaccaatccaaccagcctgaaagaaaatcta

Peptide evidence:

AATQNTPAATGQVQSLTR  
GLHAYTQHTR  
MSAPIGGKLPMHASGAGK  
TNPTSLKENLALIR

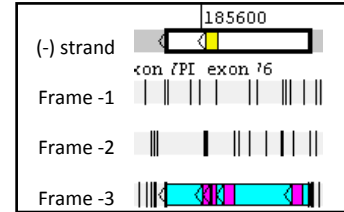

Current sequence (peptide evidence in red): 280aa

MALPIPIKRGKKPK**AATQNTPAATGQVQSLTR**GLKLEIYSESDGNVALTDLAQQAGLPNSTHRLTTMQQGFVRQVGDGLGLWTMGAHAFIVGSSFLQSRNLLAMVHPMLRRLMDESGETVNLAVLDHSDYQAIIDQVQCTALMRMSAPIGGKLPMHASGAGKAFSLTLPDDQLVQLLHKK**GLHAYTQHTRTNPTSLKENLALIR**KQGYSDDEEHALGLRCAIAACLFDEHHEFAAISISGPISRITDDRVTGALVIHAAKEITQSYGGGTGVK

Strain: Y. pseudotuberculosis PB1/+  
Gene: YPTS\_3840

Classification: transcriptional repressor IclR  
Boundaries of gene: 4290734..4291576

Oligo evidence:

acataaaaaggggttcacgcttacaccagcacaccgtaccaatccaaccagcctgaaagaaaatcta

Peptide evidence:

AATQNTPAATGQVQSLTR  
GLHAYTQHTR  
ITDDRVTGALVIHAAK  
MSAPIGGKLPMHASGAGK  
TNPTSLKENLALIR

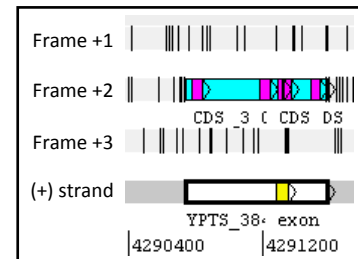

Current sequence (peptide evidence in red): 280aa

MALPIPIKRGKKPK**AATQNTPAATGQVQSLTR**GLKLEIYSESDGNVALTDLAQQAGLPNSTHRLTTMQQGFVRQVGDGLGLWTMGAHAFIVGSSFLQSRNLLAMVHPMLRRLMDESGETVNLAVLDHSDYQAIIDQVQCTALMRMSAPIGGKLPMHASGAGKAFSLTLPDDQLVQLLHKK**GLHAYTQHTRTNPTSLKENLALIR**KQGYSDDEEHALGLRCAIAACLFDEHHEFAAISISGPISRITDDRVTGALVIHAAKEITQSYGGGTGVK

# Error 34

Strain: *Y. pestis* CO92  
Gene: YPO3775

Classification: expressed pseudogene with 2 insertions  
Boundaries of gene: Frame-2, region 1: complement (4238744..4239223)  
Frame-2, region 2: complement (4236482..4236784)

Oligo evidence:

aattagctctggctgccgaacttcgctgccggtattttgcattgctgtagcccatgagcgtttat  
tattcctgttcagcagctattgttgaaactgatgctccctatttattgccaaggattgaatcctaaa

Peptide evidence:

IPVQQLLETDAPYLLPR

Proposed sequence (peptide evidence in red):

Region1: 162aa

MFDIGVNLTSVQFAKDYHQVVNRAKEAGVLGILITGDADES LAAQTLAAEYPGYCWSTTGVHPHHASSWQDSVEQKIRTLAATASVVGIGECGLDFNRNFSTPAQQEVAFTAQLALAAELS  
LPVFLHCRDAHERFIDLLVPWLDKIPAAVHCHFTGNSD

Region2: 100aa

ELDACLALGLSIGITGWVCDERRGLDLRALLPRIPVQQLLETDAPYLLPRDLNPKPASRRNEPCFLPHIVQQVAAWRQEDPNWLGQKTDENARRVRLV

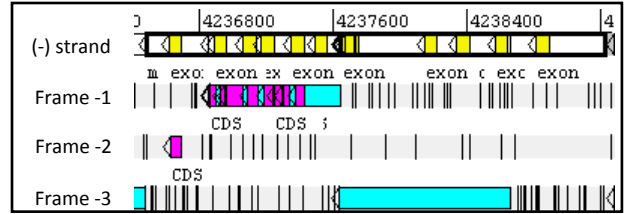

Strain: *Y. pestis* pestoides F  
Gene: YPDSF\_3392

Classification: DNase TatD  
Boundaries of gene: complement (3894442..3895224)

Oligo evidence:

tattcctgttcagcagctattgttgaaactgatgctccctatttattgccaaggattgaatcctaaa  
aattagctctggctgccgaacttcgctgccggtattttgcattgctgtagcccatgagcgtttat

Peptide evidence:

NA

Current sequence (peptide evidence in red): 260aa

MFDIGVNLTSVQFAKDYHQVVNRAKEAGVLGILITGDADES LAAQTLAAEYPGYCWSTTGVHPHHASSWQDSVEQKIRTLAATASVVGIGECGLDFNRNFSTPAQQEVAFTAQLALAAELS  
LPVFLHCRDAHERFIDLLVPWLDKIPAAVHCHFTGNSDELDAACLALGLSIGITGWVCDERRGLDLRALLPRIPVQQLLETDAPYLLPRDLNPKPASRRNEPCFLPHIVQQVAAWRQEDPNWL  
GQKTDENARRVRLV

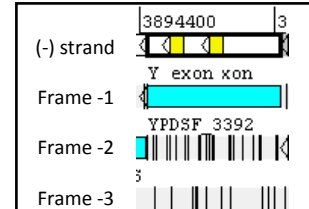

Strain: *Y. pseudotuberculosis* PB1/+  
Gene: YPTS\_0277

Classification: DNase TatD  
Boundaries of gene: 301522..302304

Oligo evidence:

aattagctctggctgccgaacttcgctgccggtattttgcattgctgtagcccatgagcgtttat  
tattcctgttcagcagctattgttgaaactgatgctccctatttattgccaaggattgaatcctaaa

Peptide evidence:

NA

Current sequence (peptide evidence in red): 260aa

MFDIGVNLTSVQFAKDYHQVVNRAKEAGVLGILITGDADES LAAQTLAAEYPGYCWSTTGVHPHHASSWQDSVEQKIRTLAATASVVAIGECGLDFNRNFSTPAQQEVAFTAQLALAAELS  
LPVFLHCRDAHERFIDLLVPWLDKIPAAVHCHFTGNSGELDAACLALGLSIGITGWVCDERRGLDLRALLPRIPVQQLLETDAPYLLPRDLNPKPASRRNEPCFLPHIVQQVAAWRQEDPNWL  
GQKTDENARRVRLV

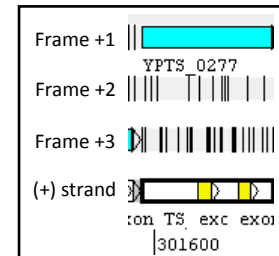

# Error 35

Strain: Y. pestis CO92  
Gene: YPO3870

Classification: expressed pseudogene  
Boundaries of gene: Frame+1: 4345237..4345503  
Frame+3: 4345506..4345661  
Frame+2: 4345661..4346731

Oligo evidence:

taagttccacctcactttatgctccatcgatctggctccaatagtttcatatgttgtagtagctgta  
tcaacaagaagcagcattcagtggtgcaaatagaagagttggaatccctggtttaaccttggaaacgagc

Peptide evidence:

IYHGV AHTTGGPEQR  
LIYHGV AHTTGGPEQR  
AELAAHEMIKPVAQR

Proposed sequence (peptide evidence in red):

Frame+1: 90aa

MMLSSTSLYAAIDLGSNSFHMLLVREVAGSIQTLARIKRVRLAAGLDNQNHLSQEAMERGWQCLKLFSERLQDIPLDQIRVVATATLR

Frame+3: 52aa

ASNADEFRLRTATEILGCPQIVISGEEEARLIYHGV AHTTGGPEQRLVVDIGG

Frame+2: 356aa

GSTELVTGNGAQANILVLSMGCVTWLERYFGDRHLAKENFERAELAAHEMIKPVAQRFREHWQVCGASGTVQALQEIMVAQGMDELITLAKLQQLKQRAIQCGKLEELIPLGLTERA  
LVFPGSLILIAIFQELSIESMTLAGGALREGLVYGMLHLPVEQDIRRRLRLNLQRRYLLDTEQAKRVSLADNFFLQVEKEWHLDGRCREFLQNACLIHEIGLSVDFKHAPQHAAYLIRNLDPG  
FTPQAKLLSALLQNSDITDLSLLNQNALPADMAQHLCRLLRLAIIFSSRRRDDTLPVRLRADNNALYVLPQGWLEQHPYRAEALEQESHWQSYVQVWPLLEELS

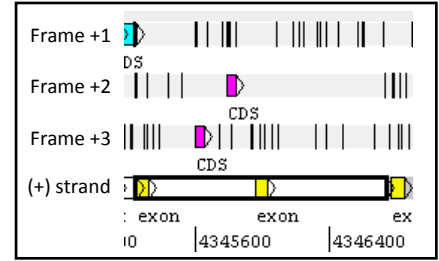

Strain: Y. pestis pestoides F  
Gene: YPDSF\_3488

Classification: guanosine pentaphosphate phosphohydrolase  
Boundaries of gene: 4001302..4002798

Oligo evidence:

taagttccacctcactttatgctccatcgatctggctccaatagtttcatatgttgtagtagctgta  
tcaacaagaagcagcattcagtggtgcaaatagaagagttggaatccctggtttaaccttggaaacgagc

Peptide evidence:

AELAAHEMIKPVAQR  
LIYHGV AHTTGGPEQR  
LRADNNALYVLPQGWLEQHPYR  
RRDRTLPAVR

Current sequence (peptide evidence in red): 498aa

MMLSSTSLYAAIDLGSNSFHMLLVREVAGSIQTLARIKRVRLAAGLDNQNHLSQEAMERGWQCLKLFSERLQDIPLDQIRVVATATLRLASNADEFRLRTATEILGCPQIVISGEEEARLIYHGV  
AHTTGGPEQRLVVDIGGGSTELVTGNGAQANILVLSMGCVTWLERYFGDRHLAKENFERAELAAHEMIKPVAQRFREHWQVCGASGTVQALQEIMVAQGMDELITLAKLQQLKQRA  
IQCGKLEELIPLGLTERALVFPVSGSLILIAIFQELSIESMTLAGGALREGLVYGMLHLPVEQDIRRRLRLNLQRRYLLDTEQAKRVSLADNFFLQVEKEWHLDGRCREFLQNACLIHEIGLSVDFK  
HAPQHAAYLIRNLDPGFTPQAKLLSALLQNSDITDLSLLNQNALPADMAQHLCRLLRLAIIFSSRRRDDTLPVRLRADNNALYVLPQGWLEQHPYRAEALEQESHWQSYVQVWPLLEELS

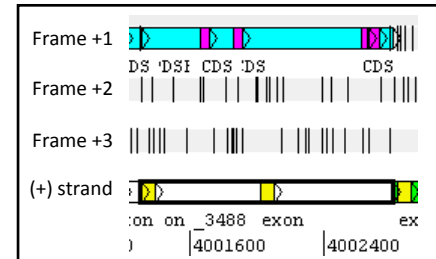

Strain: Y. pseudotuberculosis PB1/+  
Gene: YPTS\_0176

Classification: guanosine pentaphosphate phosphohydrolase  
Boundaries of gene: complement (190347..191843)

Oligo evidence:

taagttccacctcactttatgctccatcgatctggctccaatagtttcatatgttgtagtagctgta  
tcaacaagaagcagcattcagtggtgcaaatagaagagttggaatccctggtttaaccttggaaacgagc

Peptide evidence:

AELAAHEMIKPVAQR  
LIYHGV AHTTGGPEQR  
RRDRTLPAVR

Current sequence (peptide evidence in red): 498aa

MMLSSTSLYAAIDLGSNSFHMLLVREVAGSIQTLARIKRVRLAAGLDNQNHLSQEAMERGWQCLKLFSERLQDIPLDQIRVVATATLRLASNADEFRLRTATEILGCPQIVISGEEEARLIYHGV  
AHTTGGPEQRLVVDIGGGSTELVTGNGAQANILVLSMGCVTWLERYFGDRHLAKENFERAELAAHEMIKPVAQRFREHWQVCGASGTVQALQEIMVAQGMDELITLAKLQQLKQRA  
IQCGKLEELIPLGLTERALVFPVSGSLILIAIFQELSIESMTLAGGALREGLVYGMLHLPVEQDIRRRLRLNLQRRYLLDTEQAKRVSLADNFFLQVEKEWHLDGRCREFLQNACLIHEIGLSVDFK  
HAPQHAAYLIRNLDPGFTPQAKLLSALLQNSDITDLSLLNQNALPADMAQHLCRLLRLAIIFSSRRRDDTLPVRLRADNNALYVLPQGWLEQHPYRAEALEQESHWQSYVQVWPLLEELS

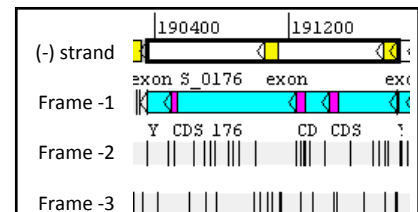

# Error 36

Strain: *Y. pestis* C092  
Gene: YPO4052

Classification: expressed pseudogene  
Boundaries of gene: Frame-3: complement (4571292..4571510)  
Frame-2: complement (4569557..4571290)

## Oligo evidence:

ctgatcgactcggattggctgcaaaactggcgatcctcaattctgaattctttgaccgagtggttca  
actgtagtcaccagcagtaattgacgaccaacaaccgtaattgacctcaacaatacataaataat

## Peptide evidence:

GIHAQNQPAQQAQAGQR

## Proposed sequence (peptide evidence in red):

Frame-3: 74aa  
MIIVTAGHVDHGKTTLLQAITGVNADRLPEEKQRGMTIDLGYAYWPLDGRIMGFIDVPGHEKFLANMLAGGG

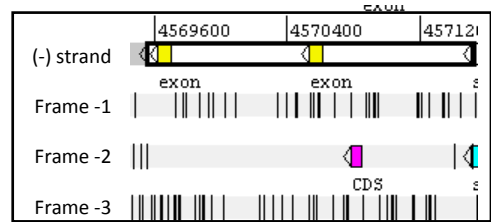

## Frame-2: 578aa

GIDHALLVACDDGVMAQTREHLAILRLSGRPALTVALTKADRVDDERIAQVHQQLQELVAQGWSAEQISLFVTAAVTERGIGELREHLAQCHQQRDPKGRQLRRFRLAIDRVFSVKGAGL  
VVTGTALAGQVAVGDTLWLTGGDCPVRVRGIHAQNQPAQQAQAGQRRIALNISGDISKQINRGDWLLAQPLPPVDRVLVTVADTPLQHWQPLHLYHGARHITGRFSLGHGQLIDD  
QQPLIDHQIINNQSTSGHSSQILAELLLDSPLWLVENDRVILRDIGAKKTLGGARVIHLAVPSRGKRQPAYLAWLTAQAQSDREVLDLHLAQGPVSVRTFSWARQLTDNEMAALLAAT  
DTVVAGDIALSHPHAQQAQQTLLHVLALYHQHGDQLGLGRARLRMALPTLDEGVVFRLLIDNLLAEGALHNTRGWLHLPEHGLAFTEQEIQGWQQAAPYFVDDPWVWRDLAELQA  
AEGEMRSLRKAQQLGYITAVVTDRIYLSQRIQLADLVRELDNRQGSVSAADFRDLRIGRKLAIQILEFFDRSGFTRRRRNGHILRDSGLFSATGS

Strain: *Y. pestis* pestoides F  
Gene: YPDSF\_0040

Classification: selenocysteinyl-tRNA-specific translation factor  
Boundaries of gene: 48255..50207

## Oligo evidence:

actgtagtcaccagcagtaattgacgaccaacaaccgtaattgacctcaacaatacataaataat  
ctgatcgactcggattggctgcaaaactggcgatcctcaattctgaattctttgaccgagtggttca

## Peptide evidence:

MIIVTAGHVDHGK  
DLAELQAAEGEMR  
DSGLFSATGS  
GIHAQNQPAQQAQAGQR

## Current sequence (peptide evidence in red): 650aa

MIIVTAGHVDHGKTTLLQAITGVNADRLPEEKQRGMTIDLGYAYWPLDGRIMGFIDVPGHEKFLANMLAGGGGIDHALLVACDDGVMAQTREHLAILRLSGRPALTVALTKADRVDD  
RIAQVHQQLQELVAQGWSAEQISLFVTAAVTERGIGELREHLAQCHQQRDPKGRQLRRFRLAIDRVFSVKGAGLVVTGTALAGQVAVGDTLWLTGGDCPVRVRGIHAQNQPAQQAQAG  
QRRIALNISGDISKQINRGDWLLAQPLPPVDRVLVTVADTPLQHWQPLHLYHGARHITGRFSLGHGQLIDDQQPLIDHQIINNQSTSGHSSQILAELLLDSPLWLVENDRVILRDIGAK  
KTLGGARVIHLAVPSRGKRQPAYLAWLTAQAQSDREVLDLHLAQGPVSVRTFSWARQLTDNEMAALLAATDTVVAGDIALSHPHAQQAQQTLLHVLALYHQHGDQLGLGRARLRM  
ALPTLDEGVVFRLLIDNLLAEGALHNTRGWLHLPEHGLAFTEQEIQGWQQAAPYFVDDPWVWRDLAELQAAEGEMRSLRKAQQLGYITAVVTDRIYLSQRIQLADLVRELDNRQGSVSA  
ADFRDLRIGRKLAIQILEFFDRSGFTRRRRNGHILRDSGLFSATGS

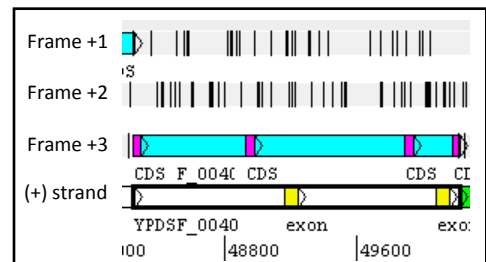

Strain: *Y. pseudotuberculosis* PB1/+  
Gene: YPTS\_4155

Classification: selenocysteinyl-tRNA-specific translation factor  
Boundaries of gene: 4640810..4642783

## Oligo evidence:

acattgcgctacacattctcagcacagcaagcgcaacagaccctctacatgactcgcctctatca  
ctgatcgactcggattggctgcaaaactggcgatcctcaattctgaattctttgaccgagtggttca

## Peptide evidence:

DLAELQAAEGEMR  
GIHAQNQPAQQAQAGQR  
VLVTVADTPLQHWQPLHLYHGAR

## Current sequence (peptide evidence in red): 657aa

MIIVTAGHVDHGKTTLLQAITGVNADRLPEEKQRGMTIDLGYAYWPLDGRIMGFIDVPGHEKFLANMLAGVGGIDHALLVACDDGVMAQTREHLAILRLSGRPALTVALTKADRVDD  
IAQVHQQLQELVAQGWSAEQISLFVTAAVTERGIGELREHLAQCHQQRDPKGRQLRRFRLAIDRVFSVKGAGLVVTGTALAGQVAVGDTLWLTGGDCPVRVRGIHAQNQPAQQAQAGQ  
RIALNISGDISKQINRGDWLLAQPLPPVDRVLVTVADTPLQHWQPLHLYHGARHITGRFSLGHGQLIDDQQPLIDHQIINNQSTSGHSSQILAELLLDSPLWLVENDRVIL  
RDIGAKKTLGGARVIHLAVPSRGKRQPAYLAWLTAQAQSDREVLDLHLAQGPVSVRTFSWARQLTDNEMAALLAATDTVVAGDIALSHSHAQQAQQTLLHVLALYHQHGDQLGLGR  
ARLRMALPTLDEGVVFRLLIDNLLAEGALHNTRGWLHLPEHGLAFTEQEIQGWQQAAPYFVDDPWVWRDLAELQAAEGEMRSLRKAQQLGYITAVVTDRIYLSQRIQLADLVRELDNR  
QGSVSAADFRDLRIGRKLAIQILEFFDRSGFTRRRRNGHILRDSGLFSATGS

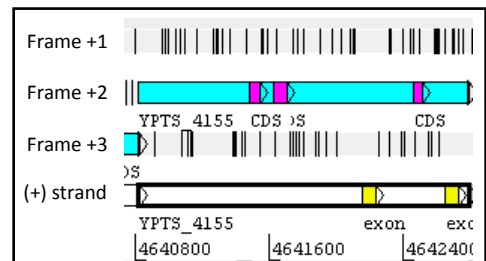

# Error 37

Strain: *Y. pestis* CO92  
Gene: YPO2267

Classification: expressed pseudogene  
Boundaries of gene: Frame+1: 2549308.. 2549508  
Frame+3: 2549517.. 2550239

Oligo evidence:

gaagaacagattggggccgctattggcacgaaggcacgaaataagcgtaatatcagctccaccaagc

Peptide evidence:

LHISQPPLSQIQILEEQIGAR  
RHEISVISVSPK

Proposed sequence (peptide evidence in red): current sequence underlined

Frame+1: 84aa

LSNLIIANNTFKISMSIELRHLRYFIAVAEELHFGRAAER**LHISQPPLSQIQILEEQIGAR**LLARRHEISVISVSPKRESSF

Frame+3: 240aa

NKRNISLTQAGKLFKESYQILAQVNSATEKAAACLHRGESGVLTIGFTSSAPLINVVSKNLRTFRQIYPQVHIKMQEVSTKQQIEALLDGRDLGIMRNTRLPEALQYRLLREPLVAVVHEDHPLASLNGSVKFFSSLDKQPFVFFSREVTALYDEFFLLTRAGITPYITQEVGEAMTIIGLVSSGLGVSILPASFRRVNV DGVKYLSDLEADATTEMWLVNHKHRPMPPLQKHCSV

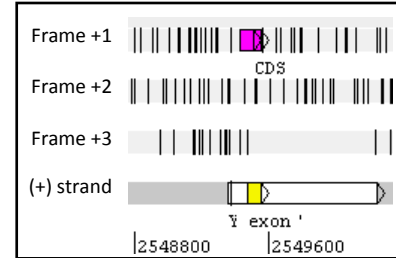

Strain: *Y. pestis* pestoides F  
Gene: YPDSF\_0866

Classification: annotated as transcriptional regulator LYSR-type  
Boundaries of gene: complement(986074..986952)

Oligo evidence:

ttattggcacgaaataagcgtaatatcagctccaccaagcgggaaagctcttttaaagagctctacc

Peptide evidence:

EVGTALYDEFFLLTR

Current sequence (peptide evidence in red): 292aa

MSIELRHLRYFIAVAEELHFGRAAERLHISQPPLSQIQILEEQIGARLLARNKRNISLTQAGKLFKESYQILAQVNSATEKAAACLHRGESGVLTIGFTSSAPLINVVSKNLRTFRQIYPQVHIKMQEVSTKQQIEALLDGRDLGIMRNTRLPEALQYRLLREPLVAVVHEDHPLASLNGSVKFFSSLDKQPFVFFSR**EVGTALYDEFFLLTR**AGITPYITQEVGEAMTIIGLVSSGLGVSILPASFRRVNV DGVKYLSDLEADATTEMWLVNHKHRPMPPLQKHCSV

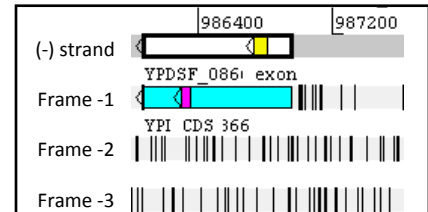

Strain: *Y. pseudotuberculosis* PB1/+  
Gene: no ortholog

# Error 38

Strain: *Y. pestis* CO92  
Gene: YPO3436

Classification: expressed pseudogene  
Boundaries of gene: complement (3838850..3839971)

## Oligo evidence:

tgatgttgaacaagactggaccgctttttgtcccactgattctgtaaatgaattatatcaggctacagct

## Peptide evidence:

EKYQGFNVEFPTGR  
ELGQVAHVQPVALTELVANAWDAGASR  
KLPDADEILTVLSAR  
LPDADEILTVLSAR

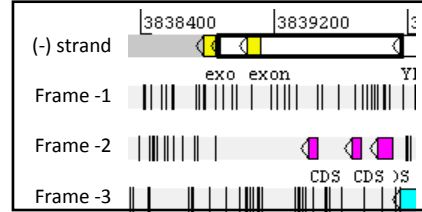

## Proposed sequence (peptide evidence in red): 373aa

MRPPMSEQLQNSLFEDDYLLR**ELGQVAHVQPVALTELVANAWDAGASR**VDLVLPTDIGGILTVTDDGHGMTPEQFKRWMTLRYTREKYQGFNVEFPTGRTARPRKAYGRNGIGRHGL  
LCFADEYEVKTWRDGIATFVVGTGAGSSPFVCRSETEEKHIGSGTRLQVQVTR**KLPDADEILTVLSAR**FIHDPEFEVRVNGKLRPFTEIDGRISEETLCLSAGRHAHVIVIDSTRLNHSSLHQGIAF  
WVQHRVLVGTSPWAVGQIANFDGRTRFARRYKIVDTEGFESDVEQDWTAFCTDSVNELYQATAEHIRDVAQRLAVEFEITSSEDALMQNRSELATLGQGARGLVAEFTTAVAQEHPTVS  
PDVNDG

Strain: *Y. pestis* pestoides F  
Gene: YPDSF\_3246

Classification: hypothetical protein  
Boundaries of gene: complement (3697940..3699049)

## Oligo evidence:

tgatgttgaacaagactggaccgctttttgtcccactgattctgtaaatgaattatatcaggctacagct

## Peptide evidence:

PLQNSLFEDDYLLR  
KLPDADEILTVLSAR

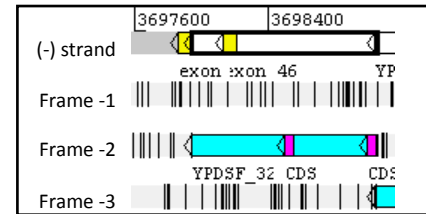

## Current sequence (peptide evidence in red): 369aa

MSEQ**PLQNSLFEDDYLLR**ELGQVAHVQPVALTELVANAWDAGASRVDLVLPTDIGGILTVTDDGHGMTPEQFKRWMTLRYTREKYQGFNVEFPTGRTARPRKAYGRNGIGRHGLLCFAD  
EYEVKTWRDGIATFVVGTGAGSSPFVCRSETEEKHIGSGTRLQVQVTR**KLPDADEILTVLSAR**FIHDPEFEVRVNGKLRPFTEIDGRISEETLCLSAGRHAHVIVIDSTRLNHSSLHQGIAFVWQ  
HRLVGTSPWAVGQIANFDGRTRFARRYKIVDTEGFESDVEQDWTAFCTDSVNELYQATAEHIRDVAQRLAVEFEITSSEDALMQNRSELATLGQGARGLVAEFTTAVAQEHPTVSPDVN  
DG

Strain: *Y. pseudotuberculosis* PB1/+  
Gene: no ortholog

# Error 39

Strain: *Y. pestis* CO92  
Gene: YPO3679

Classification: expressed pseudogene (tcaB)  
Boundaries of gene: Frame -3: complement (4112526..4113893)  
Frame-1: complement (4110301..4112526)

## Oligo evidence:

ctcatagataaattgaaatagaatatttccatataatgaattgtagccagcactattgtattcaata

## Peptide evidence:

NISTHFSSDNFLHGWN SYNKR  
HNLNLDGQPLHLPLFATPVDPK  
IASAALNGESLVPLGLSAVLDTAPNVFGLADGGSR  
IH YIQASQLLGPRPNLNSSHQWENIK  
LLLQSLSDIILHIR  
QDNEAMTLFLFQQQQK

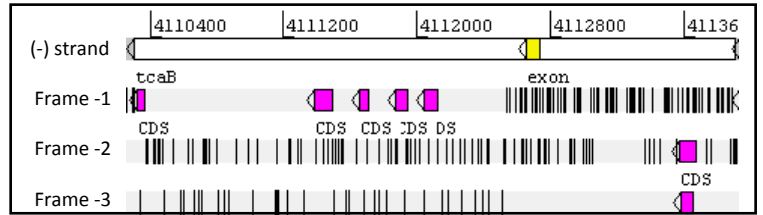

## Proposed sequence (peptide evidence in red):

Frame-3: 458aa

MPTSTVLNKNESRRDALVNYLAKNVS GDEKIKTAEQLYQYLLD TKIGHEVKTSP IAEAISSLQIYNRCVDGEENDLHEKNISTHFSSDNFLHGWN SYNKRYARWAGKEKLMYYAADYIDPT  
LRYNKTELFNTFEQINSRLTEKSVKALQSYLISYEKLAQIDTIKELYVENIKTHFFLGKTRSPCYYWRSGEQLSNDSSHLLRWSEWKKVNCNINGTEEKFFINLSWHRSSLYDWINKFSIRT  
DKDETTEKYHNRVYKNDNTWSELINMDIGFKLSTSTEVITLPPFFVNQDGNAAKEEVENLFLTNGTSIKRIESRLHG YINGHIKLCNDDGISFEIAEKLINGDNGTIGEVKIIENEKIISTINNEK  
GENKKNLIDKFEIRIFPYNELVASTIVFNRIKPEEKIIDELDDKISLLSPNSLPLKEKFQTSVDELLSYNTQK

Frame-1: 741aa

NNVKLNAFNGSYGIYLWELFFHIPLASMRFLNEQRFDLAQHWLKYLFNSAGYRDGNGNLLKEGDNLYWNILPQQDTAWDKNTLIQATDDPDVIAMQDPMQYKLAIFMRTLDIISQGD  
QAYRQLERDTLAEAKIH YIQASQLLGPRPNLNSSHQWENIKLAEESRQLENSHFLPPYNELLSYWDKLEIRLYNLRHNLNLDGQPLHLPLFATPVDPKALQRQH GAGNGINSSEQIATAQTSL  
YRFP LLIERAKSAVSAVIQFGNSLQSVLERQDNEAMTLFLFQQQQKVLQHTKDIQNNNIQVLQASLEATDSLKSAAEQRRKH YKELLNNGISSDEQLAINIRIASAALNGESLVPLGLSAVLDTA  
PNVFLADGGSRWGAIQAVGWGMQSMAMALETTAGVRDAKANYSRRAQEWTLQKQDQADKIEQLAHQYTSVQEQLNMAQKQLNLAELEQGHADALYQMSTRFTGKELYNWM  
AGRLSGLYQLFDATQPLCLMAKAALEKVDKAKTDGLFIRSGWVNDLYQG LLAGEDLQNLQKLENVWLMEEQRALEVERTVSLAQHYQQLSDHKFNLAIEIVTGYMAQDKDQKTGNEQDF  
VELKNGTLTSLSIKGLNLVEDYPETMHLGDIRRIKQISVSLPALLGPYQDVQATLDYAGENTHLAKGCTALAIRGMNDSGQFLDFNDGKYLPEFEGIDISDKGTLVLRFPNATSKQKLLLQSLSD  
IILHIRYTIRS

Strain: *Y. pestis* pestoides F  
Gene: YPDSF\_0286

Classification: annotated as toxin subunit  
Boundaries of gene: 326124..329717

## Oligo evidence:

ctcatagataaattgaaatagaatatttccatataatgaattgtagccagcactattgtattcaata  
agcctgccattaaaagaaaaattcaaacatcagtgatgagtactcagttataacaccccaaaaaata

## Peptide evidence:

IHYIQASQLLGPRPNLNSSHQWENIK  
LLLQSLSDIILHIR  
SAVSAVIQFGNSLQSVLER

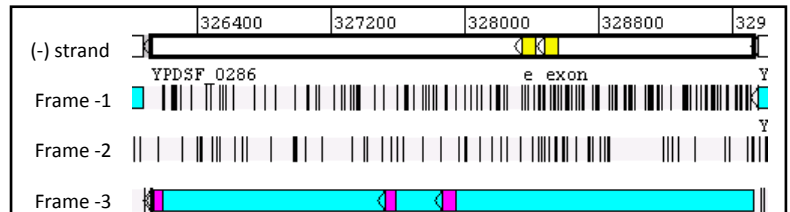

## Current sequence (peptide evidence in red): 1197aa

MPTSTVLNKNESRRDALVNYLAKNVS GDEKIKTAEQLYQYLLD TKIGHEVKTSP IAEAISSLQIYNRCVDGEENDLHEKNISTHFSSDNFLHGWN SYNKRYARWAGKEKLMYYAADYIDPT  
LRYNKTELFNTFEQINSRLTEKSVKALQSYLISYEKLAQIDTIKELYVENIKTHFFLGKTRSPCYYWRSGEQLSNDSSHLLRWSEWKKVNCNINGTEEKFFINLSWHRSSLYDWINKFSIRT  
DKDETTEKYHNRVYKNDNTWSELINMDIGFKLSTSTEVITLPPFFVNQDGNAAKEEVENLFLTNGTSIKRIESRLHG YINGHIKLCNDDGISFEIAEKLINGDNGTIGEVKIIENEKIISTINNEK  
GENKKNLIDKFEIRIFPYNELVASTIVFNRIKPEEKIIDELDDKISLLSPNSLPLKEKFQTSVDELLSYNTQKNNVKLNAFNGSYGIYLWELFFHIPLASMRFLNEQRFDLAQHWLKYLFNSAGYRD  
GNGNLLKEGDNLYWNILPQQDTAWDKNTLIQATDDPDVIAMQDPMQYKLAIFMRTLDIISQGDQAYRQLERDTLAEAKIH YIQASQLLGPRPNLNSSHQWENIKLAEESRQLENSHFLP  
PYNELLSYWDKLEIRLYNLRHNLNLDGQPLHLPLFATPVDPKALQRQH GAGNGINSSEQIATAQTSYRFP LLIERAKSAVSAVIQFGNSLQSVLERQDNEAMTLFLFQQQQKVLQHTKDIQ  
NNNIQVLQASLEATDSLKSAAEQRRKH YKELLNNGISSDEQLAINIRIASAALNGESLVPLGLSAVLDTAPNVFGLADGGSRWGAIQAVGWGMQSMAMALETTAGVRDAKANYSRRAQ  
EWTQKQDQADKIEQLAHQYTSVQEQLNMAQKQLNLAELEQGHADALYQMSTRFTGKELYNWMAGRLSGLYQLFDATQPLCLMAKAALEKVDKAKTDGLFIRSGWVNDLYQG LLAGE  
DLQNLQKLENVWLMEEQRALEVERTVSLAQHYQQLSDHKFNLAIEIVTGYMAQDKDQKTGNEQDFVELKNGTLTSLSIKGLNLVEDYPETMHLGDIRRIKQISVSLPALLGPYQDVQATLDY  
AGENTHLAKGCTALAIRGMNDSGQFLDFNDGKYLPEFEGIDISDKGTLVLRFPNATSKQKLLLQSLSDIILHIRYTIRS

Strain: *Y. pseudotuberculosis* PB1/+  
Gene: no ortholog



# Error 40

Strain: *Y. pestis* CO92  
Gene: YPMT1.89

Classification: expressed pseudo gene annotated as similar to DNA polymerase III subunit alpha  
Boundaries of gene: 93170..96208

Oligo evidence:

gcgcttactaccaagagtttgctacacaccaccggctctgagcaccgctgtatgtgatcgctctg

Peptide evidence:

DQAEIMGNLVIDAVK

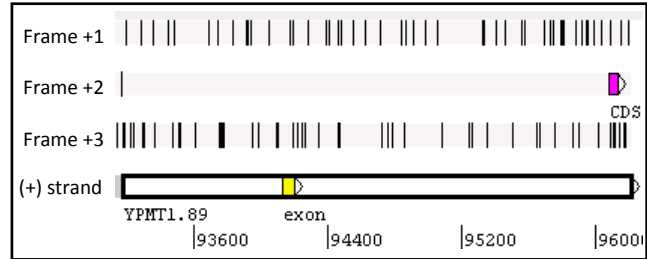

Proposed sequence (peptide evidence in red): 1013aa

MKALMVRTDFSLGESALKAENAVKIARDAGYAVISADSMNIASVIPLQRAAGDDMAVICGVKLVVDDPTYEHRARLAKESERCMEVLRDRSYCF TALIKNEQGYRDVCELMTLANKREQ  
FYFVPRRLALDQLAAAYAKGNIILLTSDIGSVFQRRDFAKIIGTLVTAGGRDNFYSVVYPHTPFYDQINVRAMKVASALKIEPVAFYPAYEAVDDADIKDIAHMVTNNIKIDQPHRLRIPHQRD  
NAVNGRRHLLLEALKAFSVRMDVPVTAAMASTTQDTIIEACTWRWHELPPALPKMADDEPATLMKLAVALGRKRLTTKEFGYTPPASEHRVYVDRKLYEMDTLRLGFCGYFLMVRDLMN  
HSRETGIPVGPGRGSSAGSLVAWCIGITNVDPIRHGLLFERFINPERLDPADLDFSQARRHEVIEYLNERYGEDYVAGIPNFTYLGAASALRDTARIYGVDAADMVSKFKNLEDDSLLEEL  
REQLASLDKYATKYPEAFKAACKLQSLMRGFGRHAAGMIVAGVPLVERTPVELRGNARCIADFDRYCEAMGLIKLDVGLATLDDLDSAKRYIKESTGEDINLDAIPLDDRKVLDFGAAGYTQG  
VFQLESGPMRLLKDLGGGIEPMSFKTVVATTALFRPGPIQSGMLDDYVSVAKGFMAPQSLHVPVDELTAETNGVILYQEQTMNATRLLAGFTMAEADGVRKAIGKKDMEKMKSMGKEFV  
VQAQAGWIDVEMEDGTTQRIHRAEHFKCEDGALRTVEEALAGVLPMAAVRVTGSQPLSETKAKEIWDAFEKNGAYQFNKSHPVAYSLSYQSMWLKTHYPAEFFAAALTILGEDKHQ  
GLVKDALTYGIHVLPPDVNVSSNRIERTLEDGSQLYAPFSAVKGCSSENGCQAIMRAREKVGKGFESLEQFEEAVEKRACACNSRVRESLQKVGAFASIEPGSLPATDPERLDRDQAEIMGNLV  
IDAVKASRPFEMNPKRSAEVNVLMTMAEMGL

Strain: *Y. pestis* pestoides F plasmid  
Gene: YPDFS\_4091

Classification: annotated as DNA polymerase III  
Boundaries of gene: complement (62215..65739)

Oligo evidence:

gcgcttactaccaagagtttgctacacaccaccggctctgagcaccgctgtatgtgatcgctctg  
Tactgatgacacgatgctggctgaaatgggtctgggagacgacctgatacggccaagcattggcattaa  
ggctactcatggagaacggctacgacacttaaggcgaagtgtctactgaggcatttgcgatgg

Peptide evidence:

NA

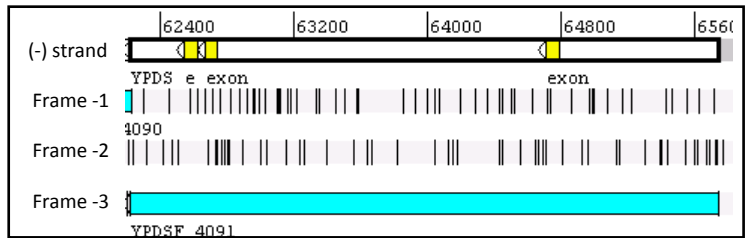

Current sequence (peptide evidence in red): 1174aa

MKALMVRTDFSLGESALKAENAVKIARDAGYAVISADSMNIASVIPLQRAAGDDMAVICGVKLVVDDPTYEHRARLAKESERCMEVLRDRSYCF TALIKNEQGYRDVCELMTLANKREQ  
FYFVPRRLALDQLAAAYAKGNIILLTSDIGSVFQRRDFAKIIGTLVTAGGRDNFYSVVYPHTPFYDQINVRAMKVASALKIEPVAFYPAYEAVDDADIKDIAHMVTNNIKIDQPHRLRIPHQRD  
NAVNGRRHLLLEALKAFSVRMDVPVTAAMASTTQDTIIEACTWRWHELPPALPKMADDEPATLMKLAVALGRKRLTTKEFGYTPPASEHRVYVDRKLYEMDTLRLGFCGYFLMVRDLMN  
HSRETGIPVGPGRGSSAGSLVAWCIGITNVDPIRHGLLFERFINPERLDPADLDFSQARRHEVIEYLNERYGEDYVAGIPNFTYLGAASALRDTARIYGVDAADMVSKFKNLEDDSLLEEL  
REQLASLDKYATKYPEAFKAACKLQSLMRGFGRHAAGMIVAGVPLVERTPVELRGNARCIADFDRYCEAMGLIKLDVGLATLDDLDSAKRYIKESTGEDINLDAIPLDDRKVLDFGAAGYTQG  
VFQLESGPMRLLKDLGGGIEPMSFKTVVATTALFRPGPIQSGMLDDYVSVAKGFMAPQSLHVPVDELTAETNGVILYQEQTMNATRLLAGFTMAEADGVRKAIGKKDMEKMKSMGKEFV  
VQAQAGWIDVEMEDGTTQRIHRAEHFKCEDGALRTVEEALAGVLPMAAVRVTGSQPLSETKAKEIWDAFEKNGAYQFNKSHPVAYSLSYQSMWLKTHYPAEFFAAALTILGEDKHQ  
GLVKDALTYGIHVLPPDVNVSSNRIERTLEDGSQLYAPFSAVKGCSSENGCQAIMRAREKVGKGFESLEQFEEAVEKRACACNSRVRESLQKVGAFASIEPGSLPATDPERLDRDQAEIMGNLV  
IDAVKASRPFEMNPKRSAEVNVLMTMAEMGLGDDLIRPSIGIKPKIMVILDNANGNDGRTGYFMENGYDDFKAKLLTAGDLRMGDLYVTGVCKKVKDKEKDYTKDEIGQTFDMREEI  
NLVRPTYVLTGSRATSLFNKSKPSDLVGRKEYPELVDVTFYGFNPILYFRPEEGEKLEAILEVAETISK

Strain: *Y. pseudotuberculosis* PB1/+  
Gene: no ortholog

# Error 41

Strain: Y. pestis CO92  
Gene: YPCO\_2638.5

Classification: novel gene  
Boundaries of gene: 2967439..2967690

Oligo evidence:

acaccaaatacagacaagtggggaaatggagcataaagcatctgctgcactcgataatccacgttccagtg

Peptide evidence:

LNDPNSSAIQR  
QLAASVLAQANK  
SLAGSALSQR  
TLNDPNSSAIQR

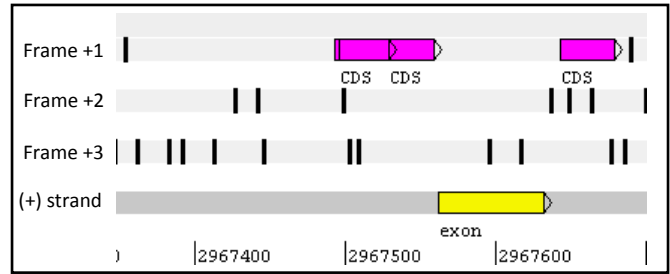

Proposed sequence (peptide evidence in red): 83aa

MSKNTKQTSQKVASIAAK**TLNDPNSSAIQRSLAGSALSQR**GTPNQTSQKEMEHKASAALDNPRSSALT**QLAASVLAQANK**DRK

# Error 75

Strain: Y. pestis pestoides F  
Gene: YPDFS\_2615.5

Classification: novel gene  
Boundaries of gene: complement(2961352..2961603)

Oligo evidence:

acaccaaatacagacaagtggggaaatggagcataaagcatctgctgcactcgataatccacgttccagtg

Peptide evidence:

QLAASVLAQANK  
TLNDPNSSAIQR  
SLAGSALSQR

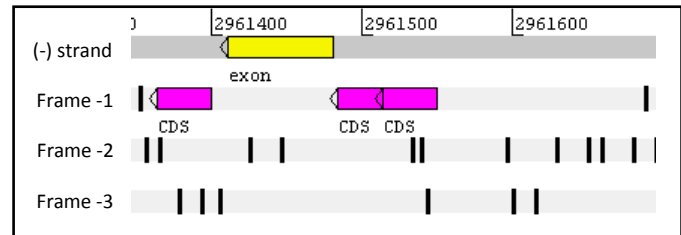

Proposed sequence (peptide evidence in red): 83aa

MSKNTKQTSQKVASIAAK**TLNDPNSSAIQRSLAGSALSQR**GTPNQTSQKEMEHKASAALDNPRSSALT**QLAASVLAQANK**DRK

Strain: Y. pseudotuberculosis PB1/+  
Gene: YPTS\_1189

Classification: annotated as hypothetical protein  
Boundaries of gene: 1338362..1338613

Oligo evidence:

acaccaaatacagacaagtggggaaatggagcataaagcatctgctgcactcgataatccacgttccagtg

Peptide evidence:

QLAASVLAQANK  
SLAGSALSQR  
TLNDPNSSAIQR

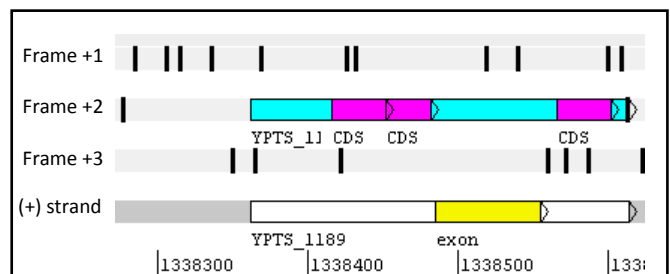

Current sequence (peptide evidence in red): 83aa

MSKNTKQTSQKVASIAAK**TLNDPNSSAIQRSLAGSALSQR**GTPNQTSQKEMEHKASAALDNPRSSALT**QLAASVLAQANK**DRK

## Error 42

Strain: *Y. pestis* CO92  
Gene: YPO1506.5

Classification: novel gene  
Boundaries of gene: 1710711..1710884

Oligo evidence:

atatttctattgctcgctatagccgcttaactcaatttagtctgttatcattttgttttacacaac

Peptide evidence:

SLVGFDDISIAR

Proposed sequence (peptide evidence in red): 57aa

LQDNTVSTLRS**SLVGFDDISIAR**YSRLNLNLCYHFVFTTTIPAIRVLKATHHPTAPP

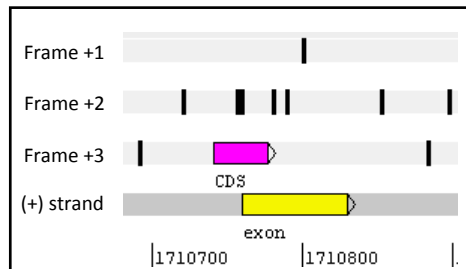

## Error lacking threshold of evidence

Strain: *Y. pestis* pestoides F  
Gene: YPDSF\_1470.5

Classification: novel gene  
Boundaries of gene: complement (1655404..1655577)

Oligo evidence:

atatttctattgctcgctatagccgcttaactcaatttagtctgttatcattttgttttacacaac

Peptide evidence:

NA

Proposed sequence (peptide evidence in red): 57aa

LQDNTVSTLRS**SLVGFDDISIAR**YSRLNLNLCYHFVFTTTIPAIRVLKATHHPTAPP

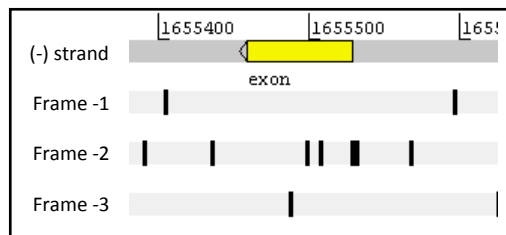

## Error lacking threshold of evidence

Strain: *Y. pseudotuberculosis* PB1/+  
Gene: YPTS\_1631.5

Classification: novel gene  
Boundaries of gene: 1828938..1829111

Oligo evidence:

atatttctattgctcgctatagccgcttaactcaatttagtctgttatcattttgttttacacaac

Peptide evidence:

NA

Proposed sequence (peptide evidence in red): 57aa

LQDNTVSTLRS**SLVGFDDISIAR**YSRLNLNLCYHFVFTTTIPAIRVLKATHHPTAPP

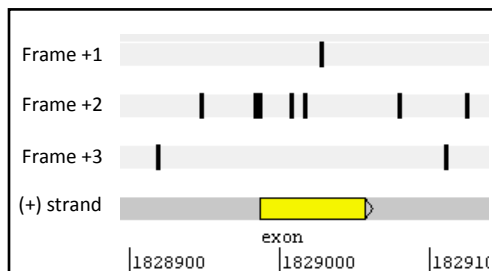

# Error 43

Strain: *Y. pestis* CO92  
Gene: YPO2180.5

Classification: novel gene  
Boundaries of gene: 2455494..2455703

Oligo evidence:

ggttctatgtttatcacggctctgagcttaactattcttaggtatgattttcgtgatttaaatacacaaa

Peptide evidence:

MIVIIAIWVVFNDVKITLSLLINK

Proposed sequence (peptide evidence in red): 69aa

VVLCFITALSLTILRYDFRDLNHKNIKLPFSIHFLRMIVIIAIWVVFNDVKITLSLLINKKHFNGIG

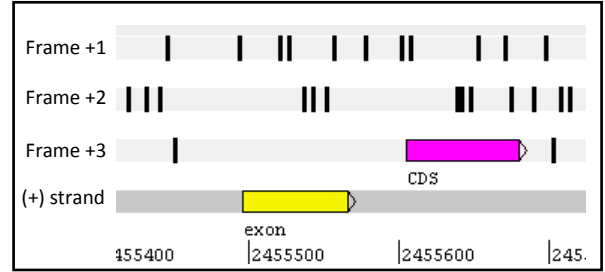

## Error lacking threshold of evidence

Strain: *Y. pestis* pestoides F  
Gene: YPDSF\_0955.5

Classification: novel gene  
Boundaries of gene: complement(1081169..1081375)

Oligo evidence:

ggttctatgtttatcacggctctgagcttaactattcttaggtatgattttcgtgatttaaatacacaaa

Peptide evidence:

NA

Proposed sequence (peptide evidence in red): 69aa

VVLCFITALSLTILRYDFRDLNHKNIKLPFSIHFLRMIVIIAIWVVFNDVKITLSLLINKKHFNGIG

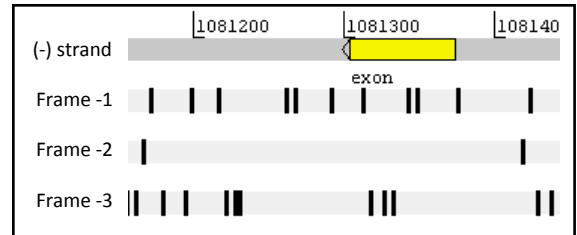

## Error lacking threshold of evidence

Strain: *Y. pseudotuberculosis* PB1/+  
Gene: YPTS\_2171.5

Classification: novel gene  
Boundaries of gene: 2397290..2397496

Oligo evidence:

ggttctatgtttatcacggctctgagcttaactattcttaggtatgattttcgtgatttaaatacacaaa

Peptide evidence:

NA

Proposed sequence (peptide evidence in red): 69aa

VVLCFITALSLTILRYDFRDLNHKNIKLPFSIHFLRMIVIIAIWVVFNDVKITLSLLINKKHFNEIG

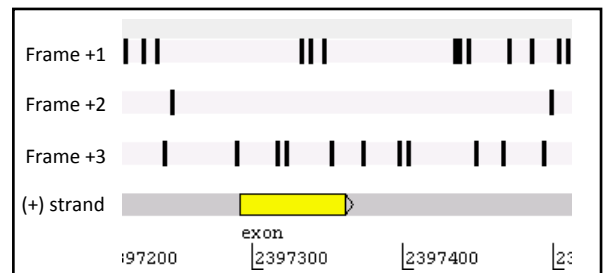

# Error 44

Strain: *Y. pestis* CO92  
Gene: YPO199.5

Classification: novel gene  
Boundaries of gene: complement(215050..215436)

Oligo evidence:

attattaaaaaagctcctggtttttgcttcgtaaacacgtgataaatccccctgttgactactggc

Peptide evidence:

KAPGFLLRKHVINPPR

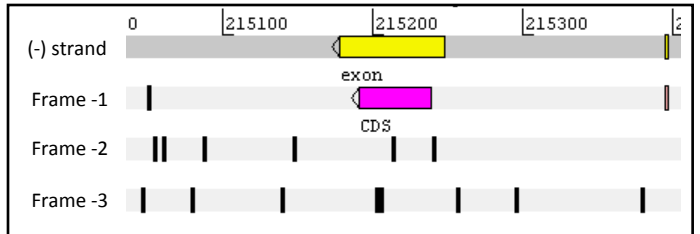

Proposed sequence (peptide evidence in red): 128aa

VTSKPLVKRTRQTLRSAELGFFGVVYTRVHTPRFCGHASNAGLLLATFMLRGLRTSWLIVAIHK**KAPGFLLRKHVINPPR**LHYWQRTRTQNFMADYLRQCQEIYSITRITMPVAADVLSGNPRSEYS

## Error lacking threshold of evidence

Strain: *Y. pestis* pestoides F  
Gene: YPDSF\_124.5

Classification: novel gene  
Boundaries of gene: complement(141564..141947)

Oligo evidence:

attattaaaaaagctcctggtttttgcttcgtaaacacgtgataaatccccctgttgactactggc

Peptide evidence:

NA

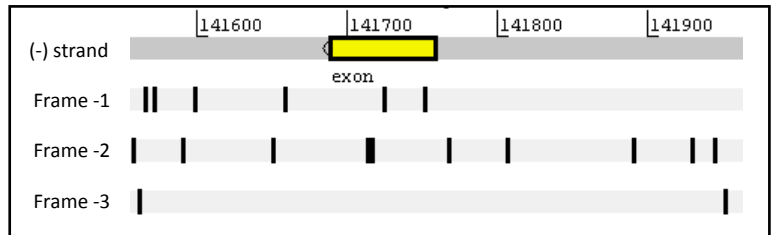

Proposed sequence (peptide evidence in red): 128aa

VTSKPLVKRTRQTLRSAELGFFGVVYTRVHTPRFCGHASNAGLLLATFMLRGLRTSWLIVAIKKAPGFLLRKHVINPPRLHYWQRTRTQNFMADYLRQCQEIYSITRITMPVAADVLSGNPRSEYS

## Error lacking threshold of evidence

Strain: *Y. pseudotuberculosis* PB1/+  
Gene: YPTS\_3897.5

Classification: novel gene  
Boundaries of gene: 4334109..4334492

Oligo evidence:

attattaaaaaagctcctggtttttgcttcgtaaacacgtgataaatccccctgttgactactggc

Peptide evidence:

NA

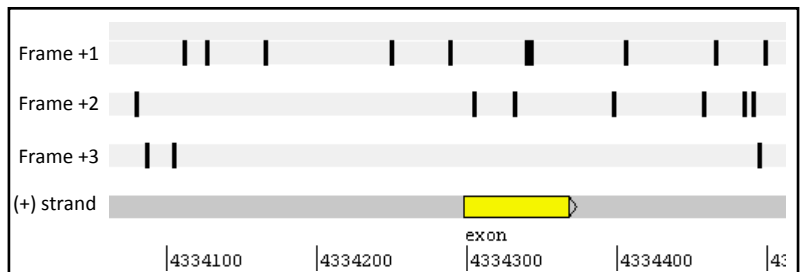

Proposed sequence (peptide evidence in red): 128aa

VTSKPLVKRTRQTLRSAELGFFGVVYTRVHTPRFCGHASNAGLLLATFMLRGLRTSWLIVAIKKAPGFLLRKHVINPPRLHYWQRTRTQNFMADYLRQCQEIYSITRITMPVAADVLSGNPRSEYS

# Error 45

Strain: *Y. pestis* CO92  
Gene: YPO1651.5

Classification: novel gene  
Boundaries of gene: complement (1877589..1877807)

Oligo evidence:

ggtcagtagcctttgtaccgccaggctccttaactctctcagcatgttatatcccctactgattacctc

Peptide evidence:

RIQTL~~SLAVILAIVNALIFNMPMFNMPMDNMPMDNA~~

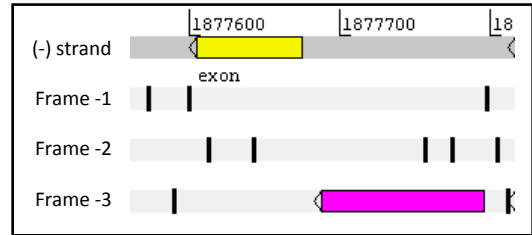

Proposed sequence (peptide evidence in red): 72a

LGHKRIQTL~~SLAVILAIVNALIFNMPMFNMPMDNMPMDNA~~PMRQWSVRFVPPGSLTLLSMLYPLLITSF~~FGM~~

---

# Error lacking threshold of evidence

Strain: *Y. pestis* pestoides F  
Gene: YPDSF\_1795

Classification: annotated as hypothetical protein/upstream start site  
Boundaries of gene: 2032150..2032383

Oligo evidence:

ggtcagtagcctttgtaccgccaggctccttaactctctcagcatgttatatcccctactgattacctc

Peptide evidence:

NA

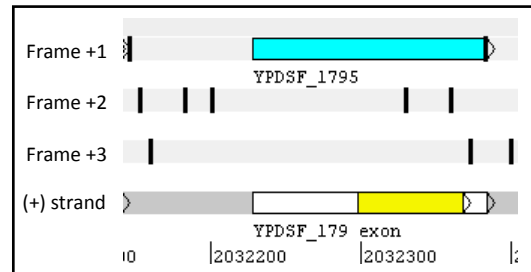

Proposed sequence (peptide evidence in red): 77aa

Current sequence underlined

LGHKRIQTL~~SLAVILAIVNALIFNIP~~MFNMPMDNMPMDNMPMDNAPMRQWSVRFVPPGSLTLLSMLYPLLITSF~~FGM~~

---

# Error lacking threshold of evidence

Strain: *Y. pseudotuberculosis* PB1/+  
Gene: YPTS\_2499.5

Classification: novel gene  
Boundaries of gene: 2776866..2777084

Oligo evidence:

ggtcagtagcctttgtaccgccaggctccttaactctctcagcatgttatatcccctactgattacctc

Peptide evidence:

NA

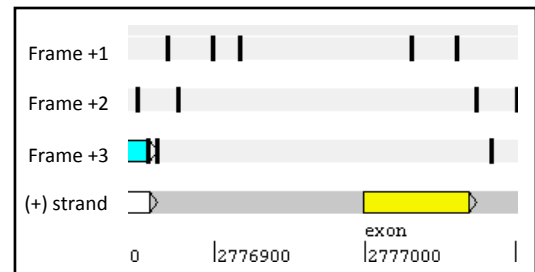

Proposed sequence (peptide evidence in red): 72aa

LGHKRIQTL~~SLAVILAIVNALIFNIP~~MFNMPMDNMPMDNMPMDNAPMRQWSVRFVPPGSLTLLSMLYPLLITSF~~FGM~~

# Error 47

Strain: Y. pestis CO92  
Gene: YPO2654.5

Classification: novel gene  
Boundaries of gene: complement(2982147..2982344)

Oligo evidence:  
NA

Peptide evidence:

DAAAFNLHLNSQHK

Proposed sequence (peptide evidence in red): 65aa  
LPVSVVGVKISKITGNITLFTVSSLVRQMKMLGAHLDALAK**DAAAFNLHLNSQHK**NNTDNFSGDNT

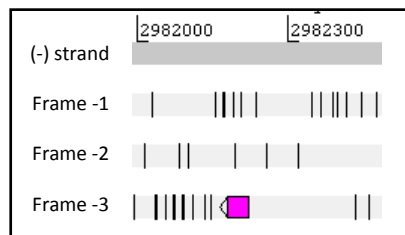

Strain: Y. pestis pestoides F  
Gene: YPDSF\_1618

Classification: annotated as hypothetical protein  
Boundaries of gene: 1812608..1812946

Oligo evidence:

cagtcaactttgagaacagcataagacatggcaatcaagctataatgcgttgcaatagagctggaac  
aaactcaatcggcgaatacactaccggaacagcattcactggtcaggcaaatgaaatgctgggggcac

Peptide evidence:

DAAAFNLHLNSQHK  
MLGAHLDALAK  
KLNTANTLPEQHSLVR

Current sequence (peptide evidence in red): 112aa  
MTMRELEVQFLKAMSELQSTFEKQHK**TWQSSYNALQYELEQSK**ARESALRVKNEMLLR**KLNTANTLPEQHSLVR**QMKMLGAHLDALAK**DAAAFNLHLNSQHK**NNTDNFSGDNT

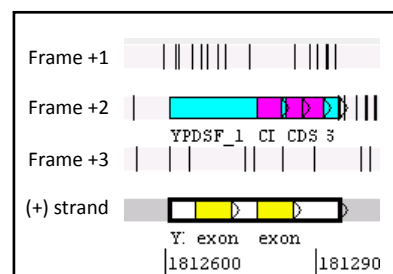

Strain: Y. pseudotuberculosis  
Gene: YPTS\_3068

Classification: annotated as hypothetical protein  
Boundaries of gene: 3397910..3398248

Oligo evidence:

cagtcaactttgagaacagcataagacatggcaatcaagctataatgcgttgcaatagagctggaac  
aaactcaatcggcgaatacactaccggaacagcattcactggtcaggcaaatgaaatgctgggggcac

Peptide evidence:

KLNTANTLPEQHSLVR  
TWQSSYNALQYELEQSK

Current sequence (peptide evidence in red): 112aa  
MTMRELEVQFLKAMSELQSTFEKQHK**TWQSSYNALQYELEQSK**ARESALRVKNEMLLR**KLNTANTLPEQHSLVR**QMKMLGAHLDALAK**DAAAFNLHLNSQHK**NNTDNFSGDNT

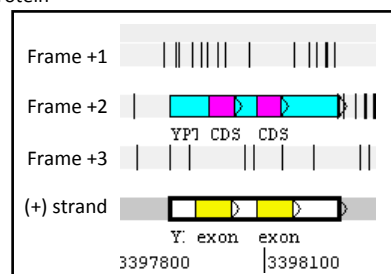

## Error 88

Strain: *Y. pestis* pestoides F plasmid MT  
Gene: YPDSF\_4088.5

Classification: novel gene  
Boundaries of gene: 60858..61109

Oligo evidence:  
NA

Peptide evidence:

HIQEAI EYALSK  
SVWSTPDVPEHHATQIR

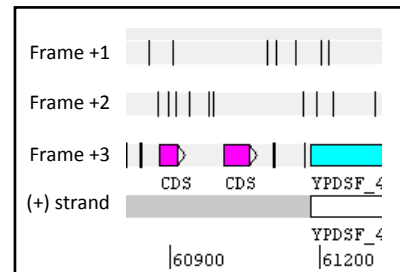

Proposed sequence (peptide evidence in red): 83aa

MKSHPNK**HIQEAI EYALSK**GWVWVVPAGKSAHCFCKLRGDKSGEHTSHHRS**SVWSTPDVPEHHATQIR**QAVDQCGRINQMSKK

## Error 48

Strain: *Y. pestis* CO92 plasmid MT  
Gene: YPMT1.53c.5

Classification: novel gene  
Boundaries of gene: 55421..55672

Oligo evidence:  
NA

Peptide evidence:

HIQEAI EYALSK  
SVWSTPDVPEHHATQIR

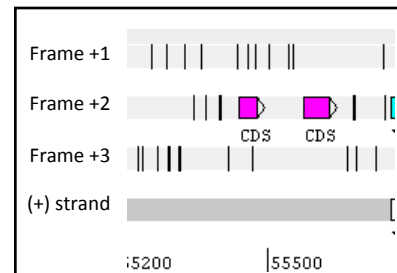

Proposed sequence (peptide evidence in red): 83aa

MKSHPNK**HIQEAI EYALSK**GWVWVVPAGKSAHCFCKLRGDKSGEHTSHHRS**SVWSTPDVPEHHATQIR**QAVDQCGRINQMSKK

Strain: *Y. pseudotuberculosis* PB1/+  
Gene: no ortholog



# Error 49

Strain: Y. pestis CO92  
Gene: YPO0099

Classification: upstream start site  
Boundaries of gene: complement (108358..109674)

## Oligo evidence:

atattagaacaaaatggttggggaaggcgctgtaacttcgggttattccacaacgttcatactgctctt  
aagtcataatacgctatgacgcttcccccttgaaaagtgtgcaatttctctggcgataatctctat

## Peptide evidence:

DAVEYIR

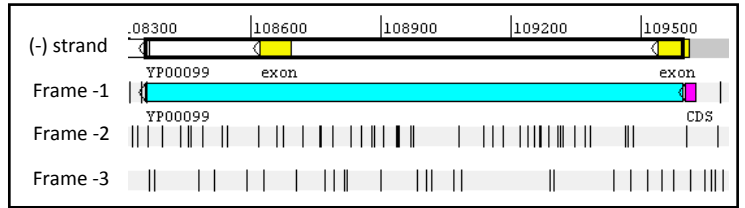

Proposed sequence (peptide evidence in red): 438aa

MMGITERGMSSNQIFRRDAVEYIRTKWLGKALLTSGYSTTFIAALCAIFLVLLITLIYGYTRRINVNGEVISQPHNIFSPQQGFITKKWVEVGDIVRKGQHLYQIDVSRRTTFSGNVSLNSLEAINNQLSQIDSIINNTQKNKELTLLNLRQQLAQYQKAHKKSQELVDNAGKGMDDMRRTMASYGYRQGLITKDQLTNQRSLFYQQQNAFQSLNTQLIQESLQIAKLESEISTRASDFDNDISQYLFQKGDLRQLAEVDASGMILLINSPSDGKIENMSVTQGQMVNVNDSLVLQTPSDNPPYCLVLWVPPNSVPYINTGDKVNIRYDAFPFEKFGQFPGRISISNVPVSQQEIASYNIAPRLPNGGLIEPYKVIVALDDIHFRYQSKPLMLSNGLKANVTFLFKRPLYQWMLSPFYDIKKSVTGPVNE

Strain: Y. pestis pestoides F  
Gene: YPDSF\_3807

Classification: annotated as hypothetical protein  
Boundaries of gene: 4375437..4376750

## Oligo evidence:

atattagaacaaaatggttggggaaggcgctgtaacttcgggttattccacaacgttcatactgctctt  
aagtcataatacgctatgacgcttcccccttgaaaagtgtgcaatttctctggcgataatctctat

## Peptide evidence:

NA

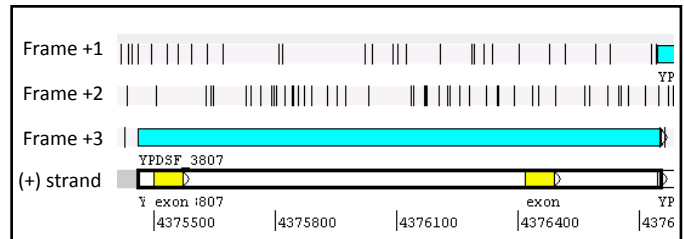

Current sequence (peptide evidence in red): 430aa

MSSNQIFRRDAVEYIRTKWLGKALLTSGYSTTFIAALCAIFLVLLITLIYGYTRRINVNGEVISQPHNIFSPQQGFITKKWVEVGDIVRKGQHLYQIDVSRRTTFSGNVSLNSLEAINNQLSQIDSIINNTQKNKELTLLNLRQQLAQYQKAHKKSQELVDNAGKGMDDMRRTMASYGYRQGLITKDQLTNQRSLFYQQQNAFQSLNTQLIQESLQIAKLESEISTRASDFDNDISQYLFQKGDLRQLAEVDASGMILLINSPSDGKIENMSVTQGQMVNVNDSLVLQTPSDNPPYCLVLWVPPNSVPYINTGDKVNIRYDAFPFEKFGQFPGRISISNVPVSQQEIASYNIAPRLPNGGLIEPYKVIVALDDIHFRYQSKPLMLSNGLKANVTFLFKRPLYQWMLSPFYDIKKSVTGPVNE

Strain: Y. pseudotuberculosis PB1/+  
Gene: YPTS\_0094

Classification: annotated as secretion protein HlyD family protein  
Boundaries of gene: 98853..100169

## Oligo evidence:

aagtcataatacgctatgacgcttcccccttgaaaagtgtgcaatttctctggcgataatctctat  
tattagaacaaaatggttggggaaggcgctgtaacttcgggttattccacaacgttcatactgctctt

## Peptide evidence:

NA

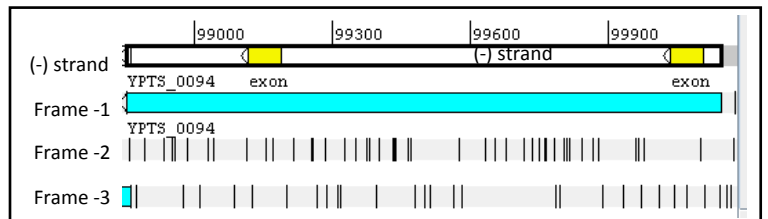

Current sequence (peptide evidence in red): 430aa

MSSNQIFRRDAVEYIRTKWLGKALLTSGYSTTFIAALCAIFLVLLITLIYGYTRRINVNGEVISQPHNIFSPQQGFITKKWVEVGDIVRKGQHLYQIDVSRRTTFSGNVSLNSLEAINNQLSQIDSIINNTQKNKELTLLNLRQQLAQYQKAHKKSQELVDNAGKGMDDMRRTMASYGYRQGLITKDQLTNQRSLFYQQQNAFQSLNTQLIQESLQIAKLESEISTRASDFDNDISQYLFQKGDLRQLAEVDASGMILLINSPSDGKIENMSVTQGQMVNVNDSLVLQTPSDNPPYCLVLWVPPNSVPYINTGDKVNIRYDAFPFEKFGQFPGRISISNVPVSQQEIASYNIAPRLPNGGLIEPYKVIVALDDIHFRYQSKPLMLSNGLKANVTFLFKRPLYQWMLSPFYDIKKSVTGPVNE

# Error 50

Strain: Y. pestis CO92  
Gene: YPO0453

Classification: upstream start site  
Boundaries of gene: 478173..478562

Oligo evidence:

ttatcatgacaaaacaattttgactgacgaaaaacaagtgctggattcacttaataggcagacggctgg  
agcactggttgacctttgtcgcgctgttgcacaaacgcgattacacaagaatcttcatctgcctttactgca

Peptide evidence:

SQLGAGIATITR  
SWLEAQLLANKR  
TKQFLTDEKQVSDSLNR

Proposed sequence (peptide evidence in red): 130aa  
Current annotation is underlined

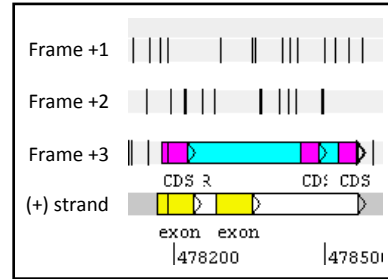

MTKQFLTDEKQVSDSLNRQTAGNPYSAADPALSAEDNQHWLSFVALLQNAITQDLHLPLLQLMLTPDERTALGTRVRIIEELMRGELSQRELKSQLGAGIATITRGSNSLKTAPPQLKSWLEAQLLANKR

Strain: Y. pestis pestoides F  
Gene: YPDFS\_3181

Classification: annotated as Trp operon repressor  
Boundaries of gene: complement (3620475..3620873)

Oligo evidence:

ttatcatgacaaaacaattttgactgacgaaaaacaagtgctggattcacttaataggcagacggctgg  
agcactggttgacctttgtcgcgctgttgcacaaacgcgattacacaagaatcttcatctgcctttactgca

Peptide evidence:

SQLGAGIATITR  
SWLEAQLLANKR

Current sequence (peptide evidence in red): 130aa

MTKQFLTDEKQVSDSLNRQTAGNPYSAADPALSAEDNQHWLSFVALLQNAITQDLHLPLLQLMLTPDERTALGTRVRIIEELMRGELSQRELKSQLGAGIATITRGSNSLKTAPPQLKSWLEAQLLANKR

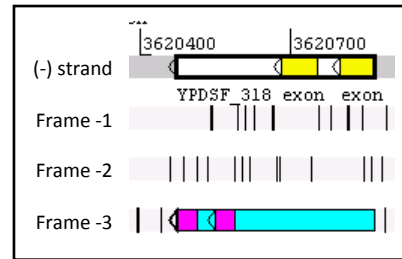

Strain: Y. pseudotuberculosis PB1/+  
Gene: YPTS\_0618

Classification: annotated as Trp operon repressor  
Boundaries of gene: 687936..688334

Oligo evidence:

ttatcatgacaaaacaattttgactgacgaaaaacaagtgctggattcacttaataggcagacggctgg  
agcactggttgacctttgtcgcgctgttgcacaaacgcgattacacaagaatcttcatctgcctttactgca

Peptide evidence:

SQLGAGIATITR  
SWLEAQLLANKR

Current sequence (peptide evidence in red): 130aa

MTKQFLTDEKQVSDSLNRQTAGNPYSAADPALSAEDNQHWLSFVALLQNAITQDLHLPLLQLMLTPDERTALGTRVRIIEELMRGELSQRELKSQLGAGIATITRGSNSLKTAPPQLKSWLEAQLLANKR

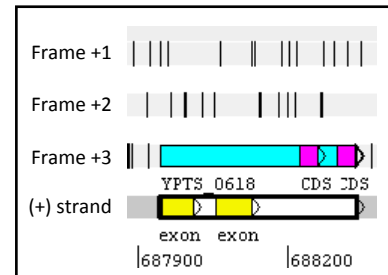

# Error 1

Strain: *Y. pestis pestoides* F  
Gene: YPDSF\_0112 / YPDSF\_0111

Classification: expressed pseudogene  
Boundaries of gene: Frame-2: complement (130808..131353)  
Frame -1: complement (130372..130806)

## Oligo evidence:

acatgcgctgaacaacgctggccagcagcagaaatccagctattagcgaataataataatcaatccgctg  
aaactcaatgcagcaggctgaattgctcattttcatgatccagcagaacaacctccgagcagcaattag

## Peptide evidence:

HEALSGFALMPELGR  
NPDVSAVHTYVYSK

## Proposed sequence (peptide evidence in red):

Frame-2: 182aa

MQRILVIRIDFLGDMVCTTALLHALKQRWPAAEIHVLANKYNQSVLAR**NPDVSAVHTYVYSK**QCERNQRPGRMLALFDRLALIWRRLRGFDLLIPNGGMNKNSIQFAKQLNVADRRWH  
TAETEFDDRNPEHVATRP**IRHEALSGFALMPELGR**VDIETLKLHVYPEPQLQAKWQADLGGK

Frame-1: 145aa

DRPRVGLFISNKSQRRWSWDKWRQLALKLNAQAELLIFHDPAEQPSEQQLAGLTARCLSTPSTDLLMAAMSQDLVLISADSAPVHIGSALQIPVVALFESRPEKYLRWYPLGVRHVLVHAG  
PQVEDIHVDAVESAAARSLTTD

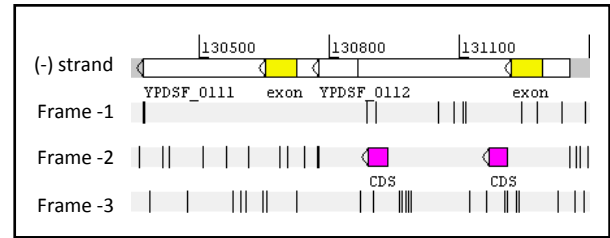

Strain: *Y. pestis* CO92  
Gene: YPO0186

Classification: annotated as putative sugar transferase  
Boundaries of gene: 203866..204846

## Oligo evidence:

acatgcgctgaacaacgctggccagcagcagaaatccagctattagcgaataataataatcaatccgctg  
aaactcaatgcagcaggctgaattgctcattttcatgatccagcagaacaacctccgagcagcaattag

## Peptide evidence:

HEALSGFALMPELGR  
HVLVHAGPQVEDIHVDAVESAAR  
LHVYPEPQLQAK  
LNAQAELLIFHDPAEQPSEQQLAGLTAR  
NPDVSAVHTYVYSK  
WHTAETEFDDRNPEHVATRP  
WPAAEIHVLANKYNQSVLAR

## Current sequence (peptide evidence in red): 326aa

MQRILVIRIDFLGDMVCTTALLHALKQR**WPAAEIHVLANKYNQSVLAR****NPDVSAVHTYVYSK**QCERNQRPGRMLALFDRLALIWRRLRGFDLLIPNGGMNKNSIQFAKQLNVADRRWH  
**TAETEFDDRNPEHVATRP****IRHEALSGFALMPELGR**VDIETLKLHVYPEPQLQAKWQADLGGKDRPRVGLFISNKSQRRWSWDKWRQLALK**LNAQAELLIFHDPAEQPSEQQLAGLTAR**CL  
STPSTDLLMAAMSQDLVLISADSAPVHIGSALQIPVVALFESRPEKYLRWYPLGVR**HVLVHAGPQVEDIHVDAVESAAR**SLTTD

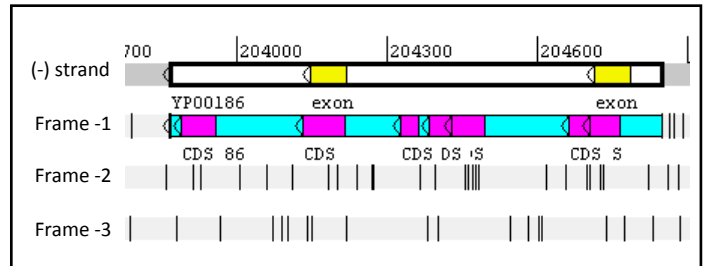

Strain: *Y. pseudotuberculosis* PB1/+  
Gene: YPTS\_3910

Classification: annotated as glycosyl transferase family protein  
Boundaries of gene: 4344683..4345663

## Oligo evidence:

acatgcgctgaacaacgctggccagcagcagaaatccagctattagcgaataataataatcaatccgctg  
aaactcaatgcagcaggctgaattgctcattttcatgatccagcagaacaacctccgagcagcaattag

## Peptide evidence:

HEALSGFALMPELGR  
HVLVHAGPQVEDIHVDAVESAAR  
LHVYPEPQLQAK  
NPDVSAVHTYVYSK

## Current sequence (peptide evidence in red): 326aa

MQRILVIRIDFLGDMVCTTALLHALKQRWPAAEIHVLANKYNQSVL**TRNPDVSAVHTYVYSK**QCERNPRPGRMLALFDRLALIWRRLRGFDLLIPNGGMNKNSIQFAKQLNVADRRWH  
AETEFDDRNPEHVATRP**IRHEALSGFALMPELGR**VDIETLKLHVYPEPQLQAKWRADLGEKDRPRVGLFISNKSQRRWSWDKWRQLALKLNAQAELLIFHDPAEQPSEQQLAGLTARCLST  
PSTDLLMAAMSQDLVLISADSAPVHIGSALQIPVVALFESRPEKYLRWYPLGVR**HVLVHAGPQVEDIHVDAVESAAR**SLTTD

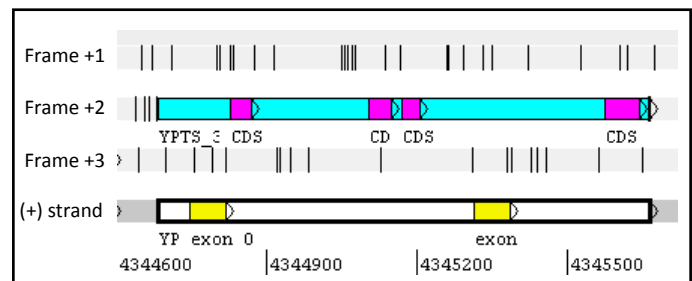

# Error 52

Strain: *Y. pestis pestoides* F  
Gene: YPDSF\_0343 / YPDSF\_0344

Classification: expressed pseudogene/frameshift  
Boundaries of gene: Frame+3: 386646..387149  
Frame+2: 387149.. 387298

Oligo evidence:

```
atataagtaattcaattaatgataagtcggtaaaccaattggattgatgtatttccgggatg  
attgaaatattgggggagcatgtatttgcctctgatgacgttgcattgttggaaaataaagt  
aaagtggtagacacccgcttacatgttggctgttcatttcagaagcggctaaaggtattgataat  
ttgctggttccatttcagaagcggctaaaggtattgataaattgtagacaaagcttggattaaactg
```

Peptide evidence:

```
AGAEVLFFAPDKPQLHVINHITGEIVAER  
GLITPLSAADPEVLDALIVLGGFGAAK  
VVTTPAYMLAGSISEAAK
```

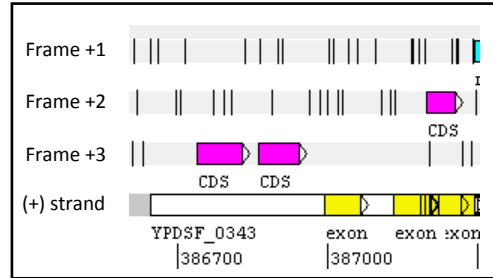

Proposed sequence (peptide evidence in red):

Frame+3: 168aa  
MKTVGVLVSGCVLDGAEIHESVLTMLALDR**AGAEVLFFAPDKPQLHVINHITGEIVAER**NVLVESARIAR**GLITPLSAADPEVLDALIVLGGFGAAK**NLCDFAIKGGECVPEPDLYKLIQLMH  
KSGKPIGLMCISPVMPLKLLGKPIRLTIGNDPDTIDAIEIMGG

Frame+2: 49aa  
EHVICPADDVVIDLEN**VVTTPAYMLAGSISEAAK**GIDKLVTKVLDLTE

Strain: *Y. pestis* CO92  
Gene: YPO3553

Classification: annotated as isoprenoid biosynthesis protein with  
amidotransferase-like domain  
Boundaries of gene: 3961893..3962546

Oligo evidence:

```
tggcctgatcacccttctcggctgatccagaggtattagatgcactaatcgtaccggaggttt  
ataaagtaattcaattaatgataagtcggtaaaccaattggattgatgtatttccgggatg  
aaagtggtagacacccgcttacatgttggctgttcatttcagaagcggctaaaggtattgataat  
ttgctggttccatttcagaagcggctaaaggtattgataaattgtagacaaagcttggattaaactg
```

Peptide evidence:

```
AGAEVLFFAPDKPQLHVINHITGEIVAER  
GLITPLSAADPEVLDALIVPGGFGAAK  
NVLVESAR  
VVTTPAYMLAGSISEAAK
```

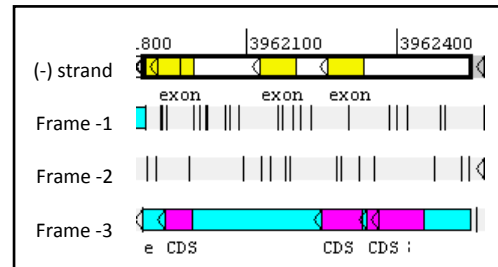

Current sequence (peptide evidence in red): 217aa

MKTVGVLVSGCVLDGAEIHESVLTMLALDR**AGAEVLFFAPDKPQLHVINHITGEIVAER**NVLVESARIAR**GLITPLSAADPEVLDALIVPGGFGAAK**NLCDFAIKGGECVPEPDLYKLIQLMH  
KSGKPIGLMCISPVMPLKLLGKPIRLTIGNDPDTIDAIEIMGG**EHVICPADDVVIDLENK****VVTTPAYMLAGSISEAAK**GIDKLVTKVLDLTE

Strain: *Y. pseudotuberculosis* PB1/+  
Gene: YPTS\_3683

Classification: annotated as isoprenoid biosynthesis protein with amidotransferase-like domain  
Boundaries of gene: 4103437..4104090

Oligo evidence:

```
tggcctgatcacccttctcggctgatccagaggtattagatgcactaatcgtaccggaggttt  
atataagtaattcaattaatgataagtcggtaaaccaattggattgatgtatttccgggatg  
aaagtggtagacacccgcttacatgttggctgttcatttcagaagcggctaaaggtattgataat
```

Peptide evidence:

```
AGAEVLFFAPDKPQLHVINHITGEIVAER  
GIDKLVTK  
GLITPLSAADPEVLDALIVPGGFGAAK  
NVLVESAR  
VVTTPAYMLAGSISEAAK
```

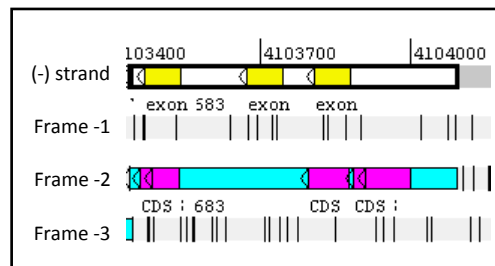

Current sequence (peptide evidence in red): 217aa

MKTVGVLVSGCVLDGAEIHESVLTMLALDR**AGAEVLFFAPDKPQLHVINHITGEIVAER**NVLVESARIAR**GLITPLSAADPEVLDALIVPGGFGAAK**NLCDFAIKGGECVPEPDLYKLIQLMH  
KSGKPIGLMCISPVMPLKLLGKPIRLTIGNDPDTIDAIEIMGG**EHVICPADDVVIDLENK****VVTTPAYMLAGSISEAAK****GIDKLVTKVLDLTE**

# Error 53

Strain: *Y. pestis pestoides F*  
 Gene: YPDSF\_0661/YPDSF\_0662  
 Oligo evidence:

Classification: expressed pseudogene  
 Boundaries of gene: Frame+1:743029..743982  
 Frame+3: 743994..745100

actaactttatggagtacttctacgattacgactactggaagtggcgcaggtgattgatttctctct  
 ctaccctgtaccgatggtagagtgaaattatctggttagaaaactacagtaatagacagcaaatcgct  
 agcagccggtacaaggtagcctgacgcttccccatggggaagccgagtgctaactcgctatctcgaata

Peptide evidence:

FHGAVVDHVGHIDTR  
 DMVDQQPVQGSLLAPWGSR

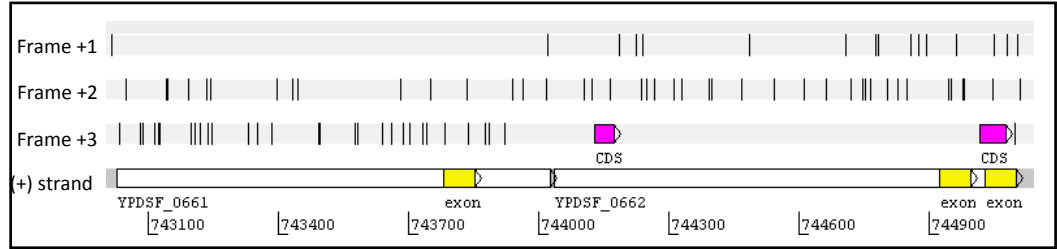

Proposed sequence (peptide evidence in red):

Frame+1: 318aa

MSKFPPLSAKVSALLHGADYNPEQWENYPIIDKDIAMMKQAKCNVMSVGFISWVKLEPSEGEYNFSLWDELIEKLYAAGIHIFLATPSGARPAWMSQKYPEVLRVGRDRVPALHGGRRHNHCMTSPVYRQKVRQINQ  
 KLAERYAHPAVIGWHISNEYGGECHCSQKFRWLQDRYQTLNLDNEAWWSAFWSHTYSDWSQIESPAPQGEVSIHGLNLDWRRFNNTAQVTEFCSEEAKPLKAANPELPTTNFMMEFYDYDYWKLAVQIDFIS  
 WDSYPMWHREKDETQLACYTAMYHDLMLRMLKQGRPFVLMESTPS

Frame+3: 368aa

ATNWQPTSKLKKPGMHILSSLQAVAHGADAVQYFQWRKSRGSVEK**FHGAVVDHVGHIDTR**VGREVSELGRILEAMSPVMGSKVDADVAIIFDWESRWAMDDAEGPRNCGLEYEKVAEHYRPFWERGIAVDIINAD  
 CDLSGYKLVIAFMLYVMEVREGFAERATRFVEQGGQFVATYWSGIVNESDLCHLGGFPGLRPLLGIWSEEIDCLADGESNQVQLAGNKAGLQGPYQAIHCLDIHLEGATAVARYRDFDYADRAAVTVNFVGEKAWY  
 VASRNDAAFQRDFFMNIAEELNLRALDQTQFPYGVTAHRRRTDGESEFIVVENYSNDSKSLVLPAYVR**DMVDQQPVQGSLLAPWGSR**VLTRYLE

Strain: *Y. pestis C092*  
 Gene: YPO0852

Classification: annotated as putative beta-galactosidase  
 Boundaries of gene: 936164..938224

Oligo evidence:

actaactttatggagtacttctacgattacgactactggaagtggcgcaggtgattgatttctctct  
 ctaccctgtaccgatggtagagtgaaattatctggttagaaaactacagtaatagacagcaaatcgct  
 agcagccggtacaaggtagcctgacgcttccccatggggaagccgagtgctaactcgctatctcgaata

Peptide evidence:

DFFMNIAEELNLR  
 DMVDQQPVQGSLLAPWGSR  
 FHGAVVDHVGHIDTR

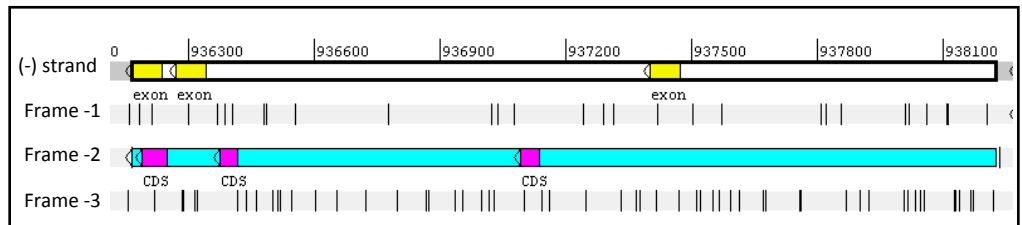

Current sequence (peptide evidence in red): 686aa

MSKFPPLSAKVSALLHGADYNPEQWENYPIIDKDIAMMKQAKCNVMSVGFISWVKLEPSEGEYNFSLWDELIEKLYAAGIHIFLATPSGARPAWMSQKYPEVLRVGRDRVPALHGGRRHNHCMTSPVYRQKVRQINQ  
 KLAERYAHPAVIGWHISNEYGGECHCSQKFRWLQDRYQTLNLDNEAWWSAFWSHTYSDWSQIESPAPQGEVSIHGLNLDWRRFNNTAQVTEFCSEEAKPLKAANPELPTTNFMMEFYDYDYWKLAVQIDFIS  
 WDSYPMWHREKDETQLACYTAMYHDLMLRMLKQGRPFVLMESTPSATNWQPTSKLKKPGMHILSSLQAVAHGADAVQYFQWRKSRGSVEK**FHGAVVDHVGHIDTR**VGREVSELGRILEAMSPVMGSKVDADVAI  
 FDWESRWAMDDAEGPRNCGLEYEKVAEHYRPFWERGIAVDIINADCDLSGYKLVIAFMLYVMEVREGFAERATRFVEQGGQFVATYWSGIVNESDLCHLGGFPGLRPLLGIWSEEIDCLADGESNQVQLAGNKAGL  
 QGPYQAIHCLDIHLEGATAVARYRDFDYADRAAVTVNFVGEKAWYVASRNDAAFQR**DFFMNIAEELNLR**ALDQTQFPYGVTAHRRRTDGESEFIVVENYSNDSKSLVLPAYVR**DMVDQQPVQGSLLAPWGSR**VLTRYLE

Strain: *Y. pseudotuberculosis PB1/+*  
 Gene: YPTS\_3219

Classification: annotated as glycoside hydrolase family 42 protein  
 Boundaries of gene: 3568067..3570127

Oligo evidence:

actaactttatggagtacttctacgattacgactactggaagtggcgcaggtgattgatttctctct  
 ctaccctgtaccgatggtagagtgaaattatctggttagaaaactacagtaatagacagcaaatcgct  
 agcagccggtacaaggtagcctgacgcttccccatggggaagccgagtgctaactcgctatctcgaata

Peptide evidence:

DMVDQQPVQGSLLAPWGSR  
 FHGAVVDHVGHIDTR

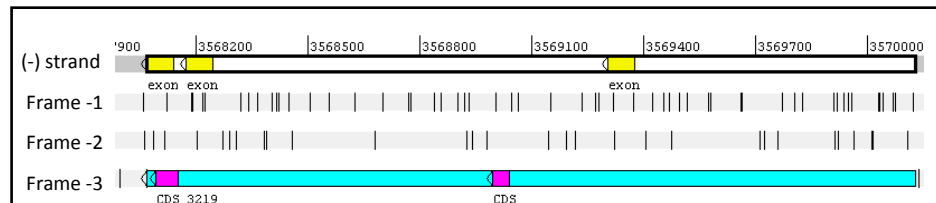

Current sequence (peptide evidence in red): 686aa

MSKFPPLSAKVSALLHGADYNPEQWENYPIIDKDIAMMKQAKCNVMSVGFISWVKLEPSEGEYNFSLWDELIEKLYAAGIHIFLATPSGARPAWMSQKYPEVLRVGRDRVPALHGGRRHNHCMTSPVYRQKVRQINQ  
 KLAERYAHPAVIGWHISNEYGGECHCSQKFRWLQDRYQTLNLDNEAWWSAFWSHTYSDWSQIESPAPQGEVSIHGLNLDWRRFNNTAQVTEFCSEEAKPLKAANPELPTTNFMMEFYDYDYWKLAVQIDFIS  
 WDSYPMWHREKDETQLACYTAMYHDLMLRMLKQGRPFVLMESTPSATNWQPTSKLKKPGMHILSSLQAVAHGADAVQYFQWRKSRGSVEK**FHGAVVDHVGHIDTR**VGREVSELGRILEAMSPVMGSKVDADVAI  
 FDWESRWAMDDAEGPRNCGLEYEKVAEHYRPFWERGIAVDIINADCDLSGYKLVIAFMLYVMEVREGFAERATRFVEQGGQFVATYWSGIVNESDLCHLGGFPGLRPLLGIWSEEIDCLADGESNQVQLAGNKAGL  
 QGPYQAIHCLDIHLEGATAVARYRDFDYADRAAVTVNFVGEKAWYVASRNDAAFQR**DFFMNIAEELNLR**ALDQTQFPYGVTAHRRRTDGESEFIVVENYSNDSKSLVLPAYVR**DMVDQQPVQGSLLAPWGSR**VLTRYLE

# Error 54

Strain: *Y. pestis* pestoides F  
Gene: YPDSF\_0663

Classification: expressed pseudogene  
Boundaries of gene: 745212..745523

Oligo evidence:

ggtaaacgatctctccaaggttaattctgaagcgctacaacaacgcggggcattaggcgttattattctt

Peptide evidence:

VNSEALQQAGALGVIIIGQEVHAIFGK

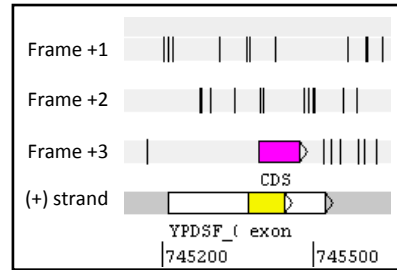

Proposed sequence (peptide evidence in red): 103aa

MISLKSFMHYFSPKPTPSFTDEEKQAEMLLHYLGGKENIKNIDACITRLRVTVNDLSK**VNSEALQQAGALGVIIIGQEVHAIFGK**QSDNLRKILDEHFSQS

Strain: *Y. pestis* CO92  
Gene: YPO0851

Classification: annotated as PTS transport protein (partial)  
Boundaries of gene: 935741..936052

Oligo evidence:

ggtaaacgatctctccaaggttaattctgaagcgctacaacaacgcggggcattaggcgttattattctt

Peptide evidence:

VNSEALQQAGALGVIIIGQEVHAIFGK

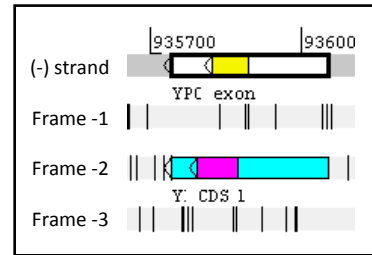

Current sequence (peptide evidence in red): 103aa

MISLKSFMHYFSPKPTPSFTDEEKQAEMLLHYLGGKENIKNIDACITRLRVTVNDLSK**VNSEALQQAGALGVIIIGQEVHAIFGK**QSDNLRKILDEHFSQS

Strain: *Y. pseudotuberculosis* PB1/+  
Gene: YPTS\_3218

Classification: annotated as PTS system transporter subunit E11B  
Boundaries of gene: 3567644..3567955

Oligo evidence:

ggtaaacgatctctccaaggttaattctgaagcgctacaacaacgcggggcattaggcgttattattctt

Peptide evidence:

VNSEALQQAGALGVIIIGQEVHAIFGK

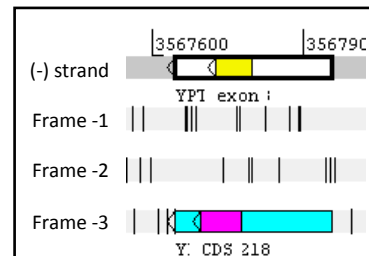

Current sequence (peptide evidence in red): 103aa

MISLKSFMHYFSPKPTPSFTDEEKQAEMLLHYLGGKENIKNIDACITRLRVTVNDLSK**VNSEALQQAGALGVIIIGQEVHAIFGK**QSDNLRKILDEHFSQS

# Error 55

Strain: *Y. pestis* pestoides F  
Gene: YPDSF\_0859

Classification: expressed pseudogene/upstream start site  
Boundaries of gene: 978809..979435

**Oligo evidence:**

tacagtgggttaaacagtaggagactccggcaaatatgtgaactggttggtgcgccgtcagataacaa  
ttttgactgtatgtgatcacaaaagcgaatgtcgacaaatatacatcacggtttgtgatgcagagta

**Peptide evidence:**

AQLVSNNAQGAALGAIQWVK  
VGAFDGPDAVDAVK  
YVELVGAPSDNNAATR

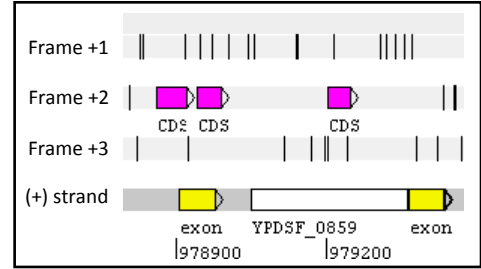

Proposed sequence (peptide evidence in red): 208aa

LPVFIINAELNQSGLAK**AQLVSNNAQGAALGAIQWVK**TVGDSGKY**YVELVGAPSDNNAATR**RANGYSSVLSQYPDLKRVGKEVANWDR**TQ**GYNKMQSMLQAN**PD**IKGVISGNDE**MALGAI**  
**AALKEAGKIDQVKVGAFDGPDAVDAVK**AGTLAYTVLQPVAVFSAKAIEQADN**FLKTGKTGARGEKQLFDCMLITKANVDKYTSPFVMSE**

Strain: *Y. pestis* CO92  
Gene: YPO2285

Classification: annotated as putative ribose-binding periplasmic protein (partial)  
Boundaries of gene: 2565022..2565645

**Oligo evidence:**

tacagtgggttaaacagtaggagactccggcaaatatgtgaactggttggtgcgccgtcagataacaa  
ttttgactgtatgtgatcacaaaagcgaatgtcgacaaatatacatcacggtttgtgatgcagagta

**Peptide evidence:**

NA

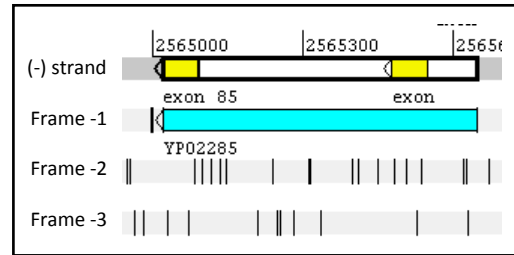

Current sequence (peptide evidence in red): 208aa

LPVFIINAELNQSGLAK**AQLVSNNAQGAALGAIQWVK**TVGDSGKY**YVELVGAPSDNNAATR**RANGYSSVLSQYPDLKRVGKEVANWDR**TQ**GYNKMQSMLQAN**PD**IKGVISGNDE**MALGAI**  
**AALKEAGKIDQVKVGAFDGPDAVDAVK**AGTLAYTVLQPVAVFSAKAIEQADN**FLKTGKTGARGEKQLFDCMLITKANVDKYTSPFVMSE**

Strain: *Y. pseudotuberculosis* PB1/+  
Gene: YPTS\_2281

Classification: annotated as periplasmic binding protein/LacI transcriptional regulator  
Boundaries of gene: 2516314..2517264

**Oligo evidence:**

tacagtgggttaaacagtaggagactccggcaaatatgtgaactggttggtgcgccgtcagataacaa  
ttttgactgtatgtgatcacaaaagcgaatgtcgacaaatatacatcacggtttgtgatgcagagta

**Peptide evidence:**

AIAANIPVFIINAELNQSGLAK  
AQLVSNNAQGAALGAIQWVK  
VGAFDGPDAVDAVK  
YVELVGAPSDNNAATR

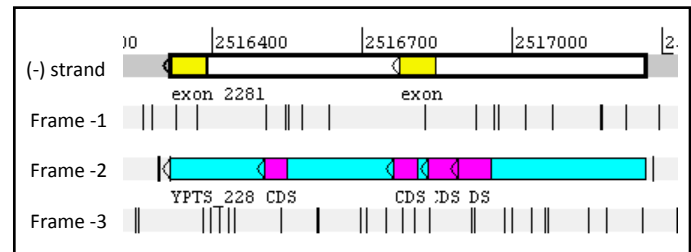

Current sequence (peptide evidence in red): 316aa

MFNSKHFLLLVAMTFATVFSTASWANNGLMTIIINDPSNPYWFTEGLVAKATAEKMGYSATVSAHKGDTNTESQLIDITAITNKSKAIIIDPANADGSIGSVK**AIAANIPVFIINAELNQSGLAK**  
**AQLVSNNAQGAALGAIQWVK**TVGDSGKY**YVELVGAPSDNNAATR**RANGYSSVLSQYPDLKRVGKEVANWDR**TQ**GYNKMQSMLQAN**PD**IKGVISGNDE**MALGAI**  
**AALKEAGKIDQVKVGAFDGPDAVDAVK**AGTLAYTVLQPVAVFSAKAIEQADN**FLKTGKTGARGEKQLFDCMLITKANVDKYTSPFVMSE**

# Error 56

Strain: *Y. pestis* pestoides F  
Gene: YPDSF\_1048/1049

Classification: expressed pseudogene  
Boundaries of gene: frame-2: complement (1180811..1180966)  
frame-1: complement (1180366..1180815)

## Oligo evidence:

tacgtcaatgactcagctctaagaaatttagaatacataaatggatgtatggttgctaggtttgggggct  
caccgttgcaagatcttaatcagatcagctccaagctattattggtcaggaagcgcctttggcggtgta  
tctggaaccggttgatttccgtggacatttagtgacagttgtgggcccattgtcggggtgaagccgc

## Peptide evidence:

FGGTVVNVK  
GHLVTVVGPIVGVEAGK

## Proposed sequence (peptide evidence in red):

frame-2: 52aa

MAMNNTSMTQSKKFRNHKWMYGLGLGALLSGCVTIPPAIQGTTATPLQDLN

frame-1: 149aa

LIRSAPKLFIGQEAR**FGGTVVNVK**NEPNRTRLEIASVPLDSGARPILEGPSQGRVIAYVDGFLEPVDFR**GHLVTVVGPIVGVEAGK**IGMTPYNFVVIKATGYKRWHIAQQVIIPPTFGPWGYRPADMWGPWPGWYNGPAEIQTIVTD

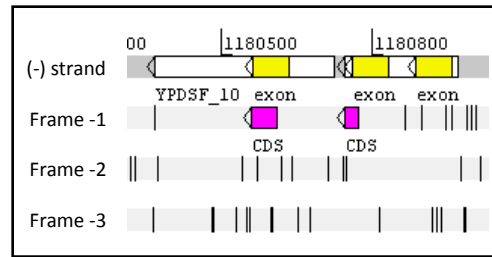

Strain: *Y. pestis* CO92  
Gene: YPO2073

Classification: annotated as putative lipoprotein  
Boundaries of gene: 2353262..2353849

## Oligo evidence:

tacgtcaatgactcagctctaagaaatttagaatacataaatggatgtatggttgctaggtttgggggct  
acgataccgctgccattcaggaacgacggcgacaccgttgcaagatcttaatctgatcagatcagctc  
tctggaaccggttgatttccgtggacatttagtgacagttgtgggcccattgtcggggtgaagccgc

## Peptide evidence:

FGGTVVNVK  
GHLVTVVGPIVGVEAGK  
IGMTPYNFVVIK  
LEIASVPLDSGARPILEGPSQGR  
TRLEIASVPLDSGARPILEGPSQGR  
VIAYVDGFLEPVDFR

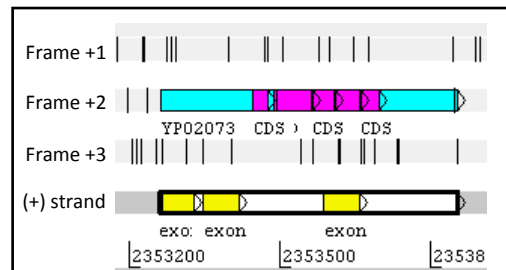

## Current sequence (peptide evidence in red): 195aa

MTQSKKFRNHKWMYGLGLGALLSGCVTIPPAIQGTTATPLQDLN**LIRSAPKLFIGQEARFGGTVVNVK**NEPNRTRLEIASVPLDSGARPILEGPSQGRVIAYVDGFLEPVDFR**GHLVTVVGPIVGVEAGKIGMTPYNFVVIK**ATGYKRWHIAQQVIIPPTFGPWGYRPADMWGPWPGWYNGPAEIQTIVTD

Strain: *Y. pseudotuberculosis* PB1/+  
Gene: YPTS\_2117

Classification: annotated as Slp family outer membrane lipoprotein  
Boundaries of gene: 2339996..2340601

## Oligo evidence:

tacgtcaatgactcagctctaagaaatttagaatacataaatggatgtatggttgctaggtttgggggct  
acgataccgctgccattcaggaacgacggcgacaccgttgcaagatcttaatctgatcagatcagctc  
tctggaaccggttgatttccgtggacatttagtgacagttgtgggcccattgtcggggtgaagccgc

## Peptide evidence:

FGGTVVNVK  
GHLVTVVGPIVGVEAGK  
IGMTPYNFVVIK  
TRLEIASVPLDSGARPILEGPSQGR  
VIAYVDGFLEPVDFR

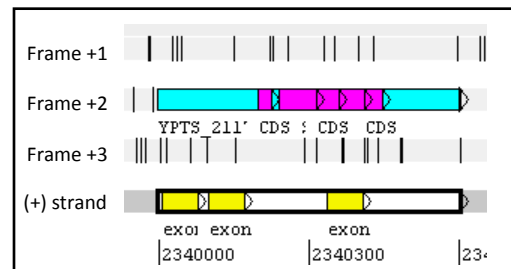

## Current sequence (peptide evidence in red): 201aa

MAMNNTSMTQSKKFRNHKWMYGLGLGALLSGCVTIPPAIQGTTATPLQDLN**LIRSAPKLFIGQEARFGGTVVNVK**NEPNRTRLEIASVPLDSGARPILEGPSQGRVIAYVDGFLEPVDFR**GHLVTVVGPIVGVEAGKIGMTPYNFVVIK**ATGYKRWHIAQQVIIPPTFGPWGYRPADMWGPWPGWYNGPAEIQTIVTD



# Error 57

Strain: *Y. pestis pestoides F*  
Gene: YPDSF\_1279 / YPDSF\_12780

Classification: expressed pseudogene  
Boundaries of gene: Frame-3: complement (1444935..1445204)  
Frame-2: complement (1444409..1444939)

## Oligo evidence:

aataaacatgacagctggagcttctatgagctttcaattgtacgtcgccgattgttctgggcatggg  
gccaacgcttgctgaacacatgggggtcaaagctaaatcacgccaacaaatgggatgctggcctcg  
tattcaagtactgacacaaaaaggtaacgaagccagtttactaagccagaagatttacaggtaagaag

Peptide evidence: KGNEGQFTKPEDLQGK  
KGNEGQFTKPEDLQGKK  
KNNPELLAAVNNAIAEMQK  
KTNDALAVAGPAFAR  
KVGVLGGSNYEQWLR  
KYDFSTPYTVSGIQVLTK  
NNPELLAAVNNAIAEMQK  
VGVGLGGSNYEQWLR  
YDFSTPYTVSGIQVLTK

Proposed sequence (peptide evidence in red):

Frame-3: 90aa

MSFSIVRRRIVLGMVAVALATGLNVKSYAAGDLEQVKQRGLTIVGLEGTYPFQSGEDGKLTGFEVDFANALAEHMGVKAKITPTKW

Frame-2: 176aa

GMLASLESKRIDVAINQVTISDERKK**KYDFSTPYTVSGIQVLTKKGNEGQFTKPEDLQGKKVGVGLGGSNYEQWLR**ENLKDVIDIRYDDPTKYQDLRVGRTDAILVDRLAALDLVKK**TNDALAVAGPAFARQESGVAMRKNNPELLAAVNNAIAEMQK**DGTLAKISEKYFGADVTQ

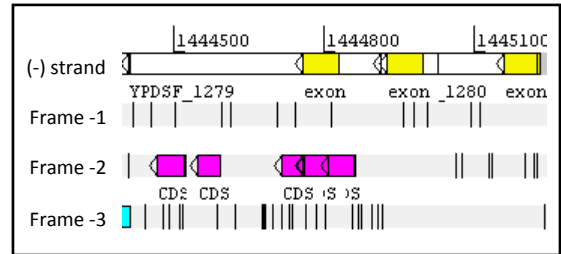

Strain: *Y. pestis C092*  
Gene: YPO1846

Classification: annotated as flhY  
Boundaries of gene: 2090975..2091775

## Oligo evidence:

aataaacatgacagctggagcttctatgagctttcaattgtacgtcgccgattgttctgggcatggg  
tattcaagtactgacacaaaaaggtaacgaagccagtttactaagccagaagatttacaggtaagaag

## Peptide evidence:

KGNEGQFTKPEDLQGK  
KGNEGQFTKPEDLQGKK  
KNNPELLAAVNNAIAEMQK  
KTNDALAVAGPAFAR  
KYDFSTPYTVSGIQVLTK  
LTGFEVDFANALAEHMGVK  
NNPELLAAVNNAIAEMQK  
RIDVAINQVTISDER  
TYDDPTK  
VGVGLGGSNYEQWLR  
YDFSTPYTVSGIQVLTK

Current sequence (peptide evidence in red): 266aa

MSFSIVRRRIVLGMVAVALATGLNVKSYAAGDLEQVKQRGLTIVGLEGTYPFQSGEDGK**LTGFEVDFANALAEHMGVKAKITPTKW**DGMLASLESKRIDVAINQVTISDERKK**KYDFSTPYTVSGIQVLTKKGNEGQFTKPEDLQGKKVGVGLGGSNYEQWLR**ENLKDVIDIR**TYDDPTK**YQDLRVGRTDAILVDRLAALDLVKK**TNDALAVAGPAFARQESGVAMRKNNPELLAAVNNAIAEMQK**DGTLAKISEKYFGADVTQ

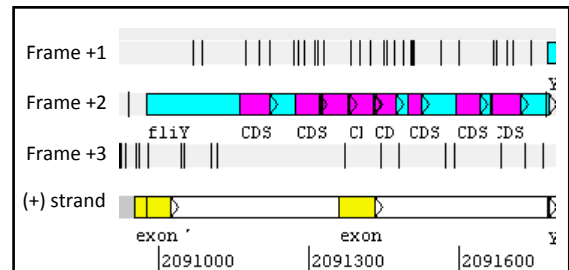

Strain: *Y. pseudotuberculosis PB1/+*  
Gene: YPTS\_1847

Classification: annotated as cystine transporter subunit  
Boundaries of gene: 2076110..2076910

## Oligo evidence:

aataaacatgacagctggagcttctatgagctttcaattgtacgtcgccgattgttctgggcatggg  
tattcaagtactgacacaaaaaggtaacgaagccagtttactaagccagaagatttacaggtaagaag

## Peptide evidence:

KGNEGQFTKPEDLQGK  
KGNEGQFTKPEDLQGKK  
KNNPELLAAVNNAIAEMQK  
KTNDALAVAGPAFAR  
KVGVLGGSNYEQWLR  
KYDFSTPYTVSGIQVLTK  
TNDALAVAGPAFAR  
TYDDPTK  
VGVGLGGSNYEQWLR

Current sequence (peptide evidence in red): 266aa

MSFSIVRRRIVLGMVAVALATGLNVKSYAAGDLEQVKQRGLTIVGLEGTYPFQSGEDGKLTGFEVDFANALAEHMGVKAKITPTKW**DGMLASLESKRIDVAINQVTISDERKKKYDFSTPYTVSGIQVLTKKGNEGQFTKPEDLQGKKVGVGLGGSNYEQWLR**ENLKDVIDIR**TYDDPTK**YQDLRVGRTDAILVDRLAALDLVKK**TNDALAVAGPAFARQESGVAMRKNNPELLAAVNNAIAEMQK**DGTLAKISEKYFGADVTQ

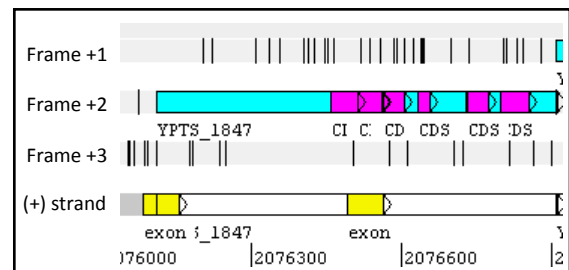

# Error 58

Strain: *Y. pestis pestoides* F  
Gene: YPDSF\_1364 / YPDSF\_1365

Classification: expressed pseudogene  
Boundaries of gene: Frame-3: complement (1530987..1531292)  
Frame-1: complement (1529950..1530987)  
Frame-2: complement (1529726..1529950)

## Oligo evidence:

tatttattgccatttggcagataaactgccgctaacaaggataaagccgcattatcggtttatc  
aaattcgcgagcagttgtagataccccacacagttgttccctgtttgccgactcttggatcaaat

## Peptide evidence:

AKDLLVAIER  
DSLDAQIIVVR

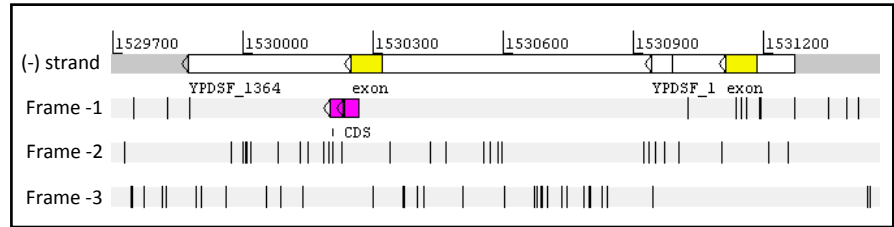

## Proposed sequence (peptide evidence in red):

Frame-3: 102aa

MFLFSESDMELLMDPSIWAGLLTLVVLEIVLGDINLVFIALLADKLPKQRDKARIIGLSLALIMRLGLLSVISWMVTLTTPLFVSGAFNFAGRDILLVGG

Frame-1: 347aa

MFLLFKATTELHERLEGNQHNDGANRGYASFWAVVQIVILDAVFLSDAVITAVGMVNDLPIMMTAVVIAMGVMLLASKSLTRFVNEHPTVVVLCFLMIGLSLIAEGFGFHIPKGYLAAIGFSILIELFNQIARRNFIKHESRLPRRQRTAEAIIRLMGGRQQEQQSGDPQQAVPTEAFEEERYMISGVLTASRSLRSMTPRTEISWVDCNRSQAEIREQLLDPHSLFPVCR**DSLDAQIIGVVR**AKDLLVAIERGESICDFAATTPPIVVPDMDVINLLGVLRLKAKGRLVVNDEFGVVQGLVTPLDVLEIAIAGEFPDEDETPDIIADGDGWLKGG

Frame-2: 74aa

ADLHLEQALDCQTLVSPADYASLAGLLSHSGHMPTAGDVIELHNLRFQIMDVSDYRIELVRITKLSNELEE

Strain: *Y. pestis* CO92

Gene: YPO1759

Classification: annotated as putative membrane protein yoaE

Boundaries of gene: 2004523..2005917

## Oligo evidence:

ggtagattagagattgttctgggcattgatcatcgcttggggctgttgcggtcattcatggatggt  
aaattcgcgagcagttgtagataccccacacagttgttccctgtttgccgactcttggatcaaat

## Peptide evidence:

NA

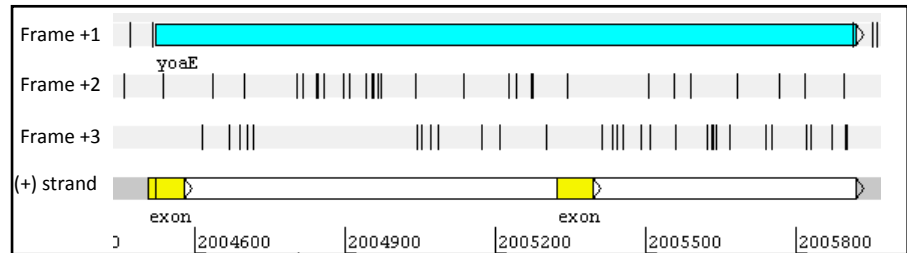

## Current sequence (peptide evidence in red): 464aa

LFWALIMRLGLLSVISWMVTLTTPLFVSGAFNFAGRDILLVGGFLFLFKATTELHERLEGNQHNDGANRGYASFWAVVQIVILDAVFLSDAVITAVGMVNDLPIMMTAVVIAMGVMLLASKSLTRFVNEHPTVVVLCFLMIGLSLIAEGFGFHIPKGYLAAIGFSILIELFNQIARRNFIKHESRLPRRQRTAEAIIRLMGGRQQEQQSGDPQQAVPTEAFEEERYMISGVLTASRSLRSMTPRTEISWVDCNRSQAEIREQLLDPHSLFPVCR**DSLDAQIIGVVR**AKDLLVAIERGESICDFAATTPPIVVPDMDVINLLGVLRLKAKGRLVVNDEFGVVQGLVTPLDVLEIAIAGEFPDEDETPDIIADGDGWLKGGADLHLEQALDCQTLVSPADYASLAGLLSHSGHMPTAGDVIELHNLRFQIMDVSDYRIELVRITKLSNELEE

Strain: *Y. pseudotuberculosis* PB1/+

Gene: YPTS\_1759

Classification: annotated as integral membrane protein TerC

Boundaries of gene: 1986376..1987920

## Oligo evidence:

tatttattgccatttggcagataaactgccgctaacaaggataaagccgcattatcggtttatc  
aaattcgcgagcagttgtagataccccacacagttgttccctgtttgccgactcttggatcaaat

## Peptide evidence:

DSLDAQIIVVR

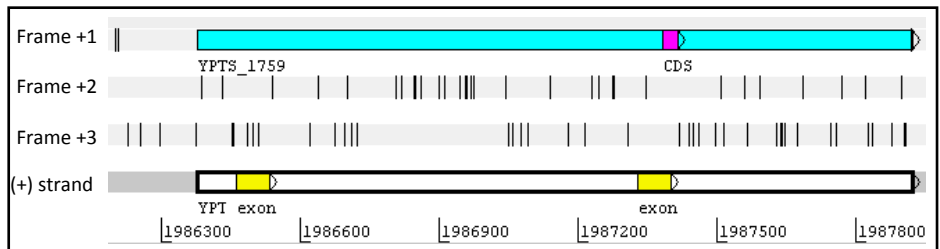

## Current sequence (peptide evidence in red): 514aa

MELLMDPSIWAGLLTLVVLEIVLGDINLVFIALLADKLPKQRDKARIIGLSLALIMRLGLLSVISWMVTLTTPLFVSGAFNFAGRDILLVGGFLFLFKATTELHERLEGNQHNDGANRGYASFWAVVQIVILDAVFLSDAVITAVGMVNDLPIMMTAVVIAMGVMLLASKSLTRFVNEHPTVVVLCFLMIGLSLIAEGFGFHIPKGYLAAIGFSILIELFNQIARRNFIKHESRLPRRQRTAEAIIRLMGGRQQEQQSGDPQQAVPTEAFEEERYMISGVLTASRSLRSMTPRTEISWVDCNRSQAEIREQLLDPHSLFPVCR**DSLDAQIIGVVR**AKDLLVAIERGESICDFAATTPPIVVPDMDVINLLGVLRLKAKGRLVVNDEFGVVQGLVTPLDVLEIAIAGEFPDEDETPDIIADGDGWLKGGADLHLEQALDCQTLVSPADYASLAGLLSHSGHMPTAGDVIELHNLRFQIMDVSDYRIELVRITKLSNELEE

# Error 59

Strain: *Y. pestis* pestoides F

Gene: YPDSF\_1421 / YPDSF\_1422 / YPDSF\_1423

Classification: expressed pseudogene

Boundaries of gene: Frame+1: 1596334..1597083

Frame+3: 1597083..1597907

Oligo evidence:

```
atatttctatcttctctgggttcatgccttgaagaagtgtatttactctagaaggggttcaac
cgctcgtcgtcgtccttcaatctgagggcatcgccattgtctttatttcgaccgtattcatgaactgc
aactggccacctctctgggggaatcagcaaaaagtggccacctctctgggggaatcagcaaaaagt
atcaggtgaatttcagaattagtcggttatgtgatcgtatctcgtattgtgggatggccgaattgtt
```

Peptide evidence:

STLMAILSGAHNHYR

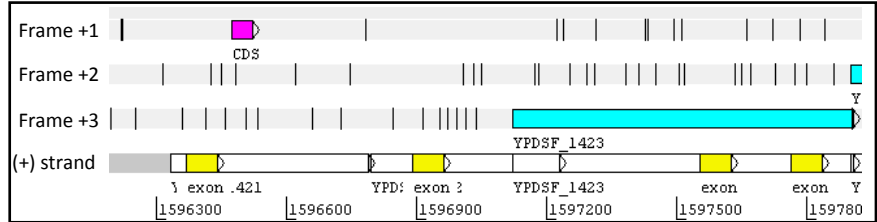

Proposed sequence (peptide evidence in red):

Frame+1: 250aa

MSSIPPSRLEMRNISISFSGFHALQEVDFTLEGGSTHALIGANGAGK**STLMAILSGAHNHYR**GEIFIDGQPIDIHSPRQARQHGIHVVQQEVDVALIPTLSVAENIMLDELADRGHLFNWPQLY  
RQAEALLEQLELKNVRQRLESCTLA+KQQVLLARALSHQCRFLILDEPTAPLDQEEARLFRVRRRLQSEGIVFISHRIHELREVCQQLTVLRDGRVSHDMEGMSGEQIVKMLGHTLED  
I

Frame+3: 274aa

FPPRRAAVSSKTRLSKTLKPKLLSVSGLHDQYKLRDISLTHQGEILGIAGLAGAGKTELCKALFGDTPSTLERGELSGKAWRPRSPDRSVAQGLALVPEERRKEGIFIDEGIPMNLVAADDSFS  
RWSLFSRRQELS WAKELIERLGIRTSSPQQKLAHLSGGNQKQVAHLSGGNQKVAIGKWLRGDAQVLIFDEPTKGVDIKAKQDLFSLIDQLAQKGGIHYASGEFSELVGLCDRIVLWDGRI  
VAELNAAEVDDEETLLLFSTGGTPQ

Strain: *Y. pestis* CO92

Gene: YPO1554

Classification: pseudo gene

Boundaries of gene: Frame-2: complement (1769183.. 1769932)

Frame-2: complement (1768392.. 1769183)

Oligo evidence:

```
atatttctatcttctctgggttcatgccttgaagaagtgtatttactctagaaggggttcaac
cgctcgtcgtcgtccttcaatctgagggcatcgccattgtctttatttcgaccgtattcatgaactgc
tcattcccaacaaaaactggccacctctctgggggaatcagcaaaaagtggccattgttaaatggc
atcaggtgaatttcagaattagtcggttatgtgatcgtatctcgtattgtgggatggccgaattgtt
```

Peptide evidence:

NA

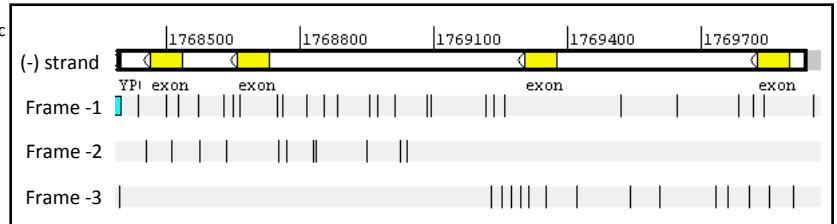

Current sequence (peptide evidence in red):

Frame-2: 250aa

MSSIPPSRLEMRNISISFSGFHALQEVDFTLEGGSTHALIGANGAGKSTLMAILSGAHNHYRGEIFIDGQPIDIHSPRQARQHGIHVVQQEVDVALIPTLSVAENIMLDELADRGHLFNWPQLY  
RQAEALLEQLELKNVRQRLESCTLAEQKQVLLARALSHQCRFLILDEPTAPLDQEEARLFRVRRRLQSEGIVFISHRIHELREVCQQLTVLRDGRVSHDMEGMSGEQIVKMLGHTLED  
I

Frame-3: 264aa

FPPRRAAVSSKTRLSKTLKPKLLSVSGLHDQYKLRDISLTHQGEILGIAGLAGAGKTELCKALFGDTPSTLERGELSGKAWRPRSPDRSVAQGLALVPEERRKEGIFIDEGIPMNLVAADDSFS  
RWSLFSRRQELS WAKELIERLGIRTSSPQQKLAHLSGGNQKQVAIGKWLRGDAQVLIFDEPTKGVDIKAKQDLFSLIDQLAQKGGIHYASGEFSELVGLCDRIVLWDGRIVAEELNAAEVDDEE  
TLLLFSTGGTPQ

Strain: *Y. pseudotuberculosis* PB1/+

Gene: YPTS\_1677

Classification: annotated as ABC transporter-like protein

Boundaries of gene: 1885230..1886786

Oligo evidence:

```
cgctcgtcgtcgtccttcaatctgagggcatcgccattgtctttatttcgaccgtattcatgaactgc
atcaggtgaatttcagaattagtcggttatgtgatcgtatctcgtattgtgggatggccgaattgtt
```

Peptide evidence:

NA

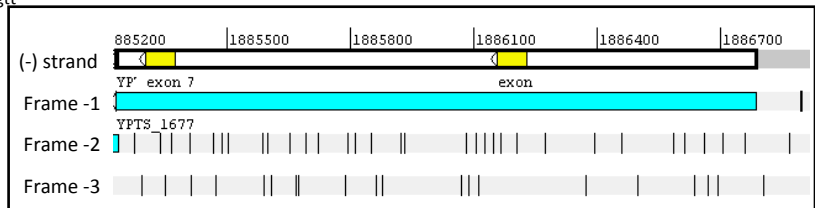

Current sequence (peptide evidence in red): 518aa

MSSIPPSRLEMRNISISFSGFHALQEVDFTLEGGSTHALIGANGAGKSTLMAILSGAHNHYRGEIFIDGQPIDIHSPRQARQHGIHVVQQEVDVALIPTLSVAENIMLDELADRGHLFNWPQLY  
RQAEALLEQLELKNVRQRLESCTLAEQKQVLLARALSHQCRFLILDEPTAPLDQEEARLFRVRRRLQSEGIVFISHRIHELREVCQQLTVLRDGRVSHDMEGMSGEQIVKMLGHTLED  
IFPPRRAAVSSKTRLSKTLKPKLLSVSGLHDQYKLRDISLTHQGEILGIADLAGAGKTELCKALFGDTPSTLERGELSGKAWRPRSPDRSVAQGLALVPEERRKEGIFIDEGIPMNLVAAD  
DDSFWSLFSRRQELS WAKELIERLGIRTSSPQQKLAHLSGGNQKQVAIGKWLRGDAQVLIFDEPTKGVDIKAKQDLFSLIDQLAQKGGIHYASGEFSELVGLCDRIVLWDGRIVAEELNAAE  
VDDEETLLLFSTGGTPQ

# Error 60

Strain: *Y. pestis pestoides* F  
Gene: YPDSF\_1980 / YPDSF\_1981

Classification: expressed pseudogene  
Boundaries of gene: Frame-1: complement(2238436..2238726)  
Frame-3: complement(2238138..2238434)

Oligo evidence:

cagtgaagtcgatcaaatgctacttcaattccccatcatggcgggtggcagcagattattgcctga  
ggacaagggtgtttgcaggttctaccctacaaggtgatgaattgtcgcccgattggcactaaaaat

Peptide evidence:

LMFASDLHGSLPATER

Proposed sequence (peptide evidence in red):

Frame-1: 97aa

MKLMFASDLHGSLPATERVLAIFDHSGAQWLVLGDLNHGPRNALPEGYQPAAVAESLNAYKPAAVAESLNAYKDSIIAVRGNCDEVDQMLLQFP

Frame-3: 98aa

IMAGWQQIIMPETRLFLTHGHLYHLGALPPLRHGDVLAYGHTLHPQAQWQGDIIICFNPGSVSIPKGEYPASYGMLDKGVLQVLTQGDEIVARLALKN

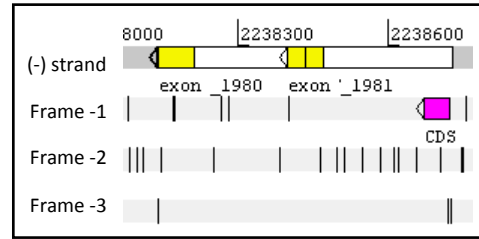

Strain: *Y. pestis* CO92  
Gene: YPO2780

Classification: annotated as phosphodiesterase  
Boundaries of gene: 3114471..3115046

Oligo evidence:

ggacaagggtgtttgcaggttctaccctacaaggtgatgaattgtcgcccgattggcactaaaaat

Peptide evidence:

NA

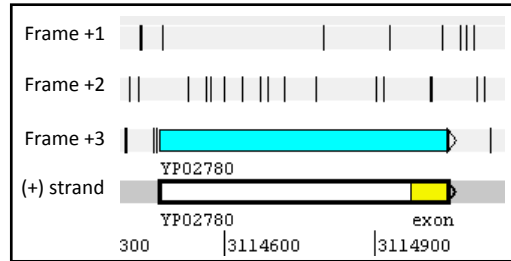

Current sequence (peptide evidence in red): 191aa

LLLTVMVRYRPRNVFWRFSFDHSGAQWLVLGDLNHGPRNALPEGYQPAAVAESLNAYKPAAVAESLNAYKDSIIAVRGNCDEVDQMLLQFPIMAGWQQIIMPETRLFLTHGHLYHPGALPPLRHGDVLAYGHTLHPQAQWQGDIIICFNPGSVSIPKGEYPASYGMLDKGVLQVLTQGDEIVARLALKN

Strain: *Y. pseudotuberculosis* PB1/+  
Gene: YPTS\_2698

Classification: annotated as phosphodiesterase  
Boundaries of gene: 2997788..2998339

Oligo evidence:

ggacaagggtgtttgcaggttctaccctacaaggtgatgaattgtcgcccgattggcactaaaaat

Peptide evidence:

GVLQVLTQGDEIVAR  
LFLTHGHLYHPGALPPLR  
LMFASDLHGSLPATER  
NALPEGYQPAAVAESLNAYK

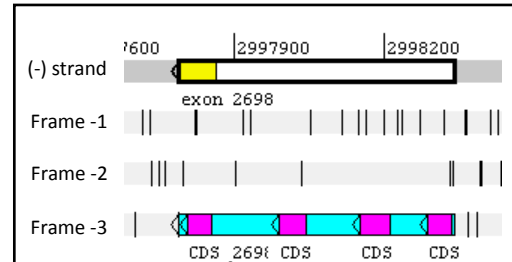

Current sequence (peptide evidence in red): 183aa

MKLMFASDLHGSLPATERVLAIFDHSGAQWLVLGDLNHGPRNALPEGYQPAAVAESLNAYKDSIIAVRGNCDEVDQMLLQFPIMAGWQQIIMPETRLFLTHGHLYHPGALPPLRHGDVLAYGHTLHPQAQWQGDIIICFNPGSVSIPKGEYPASYGMLDKGVLQVLTQGDEIVARLALKN

# Error 61

Strain: *Y. pestis* pestoides F  
Gene: YPDFS\_2565

Classification: expressed pseudogene  
Boundaries of gene: Frame-1: complement(2913694..2914515)  
Frame-3: complement(2913453..2913683)

## Oligo evidence:

tttcaaaagcagatggaagtgggaacgggatgtttccaacaattgcgcaaggtagaaaatctatcatag  
aagtagcctcaaaacctggaaagtggtagaacctaactatggccagagattaccgatgctgtattgg

## Peptide evidence:

FPSTVNAAEVAK

## Proposed sequence (peptide evidence in red):

Frame-1: 274aa

MNYQNDDLRIKEIKELPPVALLEK**FPSTVNAAEVAK**TRNAIHNILRAQDDRLVVIGPCSIHDTQAAKEYAARLLALREELQGELEVVMRVYFEKPRTTVGWKGGLINDPHMDNSYDINEGLR  
LARELLVEINDSGLPAAGEFLDMITPQYLADLMSWGAIGARTTESQVHRELASGLSCLPVGFKNGTDGTIKVAIDAINAASAPHCLSVTKWGHSAIVNTAGNGDCHILRGGKEPNYSSKHVN  
AVKEGLIKAGLEPQIMIDFSHANSCKQ

Frame-3: 76aa

FQKQMEVGTDVCQQAQGEKSIIGVMIESHLVEGSQNLESGEPLTYGQSITDACIGWKDTEALLRQLAGAVRARRQ

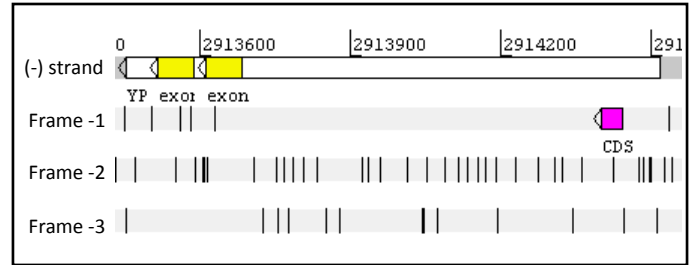

Strain: *Y. pestis* CO92

Gene: YPO1130

Classification: pseudogene

Boundaries of gene: Frame+3: 1277103..1280114

## Oligo evidence:

ctggaacccagattatgatcgattcagccacgctaacagttgcaaacagtttcaaaagcagatggaag  
tttcaaaagcagatggaagtgggaacgggatgtttccaacaattgcgcaaggtagaaaatctatcatag  
agcacaacctggaaagtggtagaacctaactattgtcaacgacggatgaaagtgatcactatata  
tcacttatctccaccaacggccaatattgatccaccgttttactcaggattagcttctgctataac

## Peptide evidence:

NA

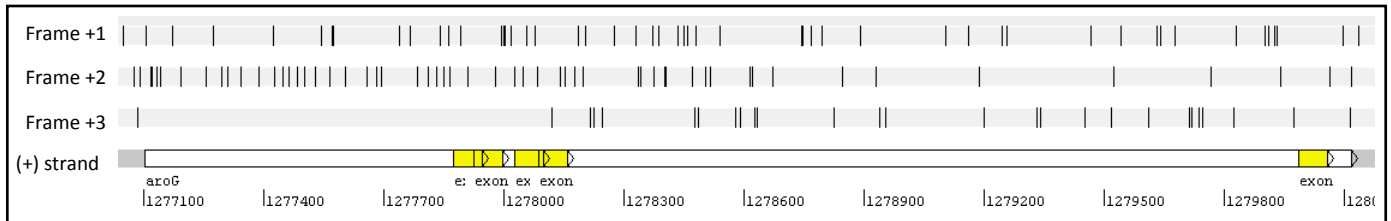

## Current sequence (peptide evidence in red):

Frame+3: 338aa

MNYQNDDLRIKEIKELPPVALLEKFPSTVNAAEVAKTRNAIHNILRAQDDRLVVIGPCSIHDTQAAKEYAARLLALREELQGELEVVMRVYFEKPRTTVGWKGGLINDPHMDNSYDINEGLR  
LARELLVEINDSGLPAAGEFLDMITPQYLADLMSWGAIGARTTESQVHRELASGLSCLPVGFKNGTDGTIKVAIDAINAASAPHCLSVTKWGHSAIVNTAGNGDCHILRGGKEPNYSSKHVN  
AVKEGLIKAGLEPQIMIDFSHANSCKQFQKQMEVGTDVCQQAQGEKSIIGVMIESHLVEGSQNLESGEPLTYCQRMRKSDPLISPPTAQY

Strain: *Y. pseudotuberculosis* PB1/+

Gene: YPTS\_1243

Classification: annotated as phospho-2-dehydro-3-deoxyheptonate aldolase

Boundaries of gene: 1388767..1389819

## Oligo evidence:

ctggaacccagattatgatcgattcagccacgctaacagttgcaaacagtttcaaaagcagatggaag  
tttcaaaagcagatggaagtgggaacgggatgtttccaacaattgcgcaaggtagaaaatctatcatag  
aagtagcctcaaaacctggaaagtggtagaacctaactatggccagagattaccgatgctgtattgg

## Peptide evidence:

ELPPVALLEKFPSTVNAAEVAK  
FPSTVNAAEVAK  
GLINDPHMDNSYDINEGLR

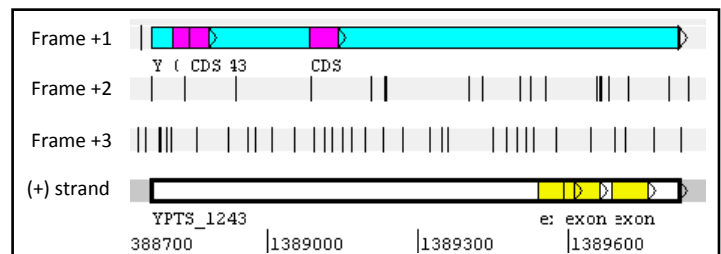

## Current sequence (peptide evidence in red): 350aa

MNYQNDDLRIKEIK**ELPPVALLEKFPSTVNAAEVAK**TRNAIHNILRAQDDRLVVIGPCSIHDTQAAKEYAARLLALREELQGELEVVMRVYFEKPRTTVGWKGGLINDPHMDNSYDINEGLR  
LARELLVEINDSGLPAAGEFLDMITPQYLADLMSWGAIGARTTESQVHRELASGLSCLPVGFKNGTDGTIKVAIDAINAASAPHCLSVTKWGHSAIVNTAGNGDCHILRGGKEPNYSSKHVN  
AVKEGLIKAGLEPQIMIDFSHANSCKQFQKQMEVGTDVCQQAQGEKSIIGVMIESHLVEGSQNLESGEPLTYGQSITDACIGWKDTEALLRQLAGAVRARRQ

# Error 62

Strain: *Y. pestis* pestoides F  
Gene: YPDSF\_3023/ YPDSF\_3024

Classification: expressed pseudogene  
Boundaries of gene: 3430740..3431348  
Frame-2: complement (3430565..3430735)

## Oligo evidence:

aaagtctgaaatgataaaaccctatgttcttgctgggataacgaccgatgaaattgatcggtatgcc  
tgccgttaccgaatcgggatacgcactgctgacgcctggcctgaaggcactggcgaatacgaagccatc

## Peptide evidence:

AVRPGATLGDIGASIQQLAEGAGFSVVR

## Proposed sequence (peptide evidence in red):

Frame-3: 203aa

MTEVKIHSPAIEIMARAAGQAAAKVLEMIPYVLAGITDDEIDRLCHDYIVNELKVIPANIGYHGTRTVCTSVNHVVCHGIPSDKLLKNGDIVNIDVAIIKEGWYGDTSRMYFVGEPVRAKRLVDITYQSMVAGIKAVRPGATLGDIGASIQQLAEGAGFSVVR EYCGHGVGQEYHTAPQVLHYGIAQTGMLLKPGMIFTI

Frame-2: 56aa

MINAGKAATSVLSDGWTVTVKDRSLSAQWEHTIAVTESGYDLLTPWPEGTEYEAI

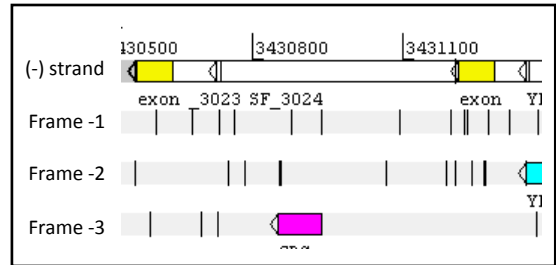

Strain: *Y. pestis* CO92  
Gene: YPO3337

Classification: annotated as methionine aminopeptidase  
Boundaries of gene: 3723448..3724233

## Oligo evidence:

aaagtctgaaatgataaaaccctatgttcttgctgggataacgaccgatgaaattgatcggtatgcc  
tgccgttaccgaatcgggatacgcactgctgacgcctggcctgaaggcactggcgaatacgaagccatc

## Peptide evidence:

AATSVLSDGWTVTVK  
AVRPGATLGDIGASIQQLAEGAGFSVVR  
RLVDITYQSMVAGIK

## Current sequence (peptide evidence in red): 261aa

MTEVKIHSPAIEIMARAAGQAAAKVLEMIPYVLAGITDDEIDRLCHDYIVNELKVIPANIGYHGTRTVCTSVNHVVCHGIPSDKLLKNGDIVNIDVAIIKEGWYGDTSRMYFVGEPVRAKRLVDITYQSMVAGIKAVRPGATLGDIGASIQQLAEGAGFSVVR EYCGHGVGQEYHTAPQVLHYGIAQTGMLLKPGMIFTI EPIEMINAGKAATSVLSDGWTVTVKDRSLSAQWEHTIAVTESGYDLLTPWPEGTEYEAI

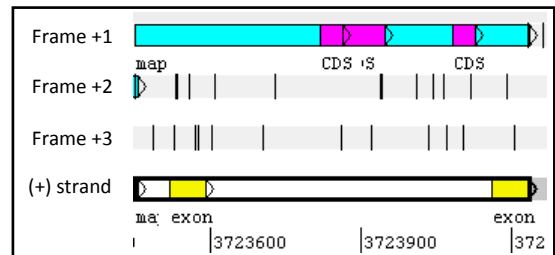

Strain: *Y. pseudotuberculosis* PB1/+  
Gene: YPTS\_0829

Classification: annotated as methionine aminopeptidase, type I  
Boundaries of gene: 933532..934317

## Oligo evidence:

aaagtctgaaatgataaaaccctatgttcttgctgggataacgaccgatgaaattgatcggtatgcc  
tgccgttaccgaatcgggatacgcactgctgacgcctggcctgaaggcactggcgaatacgaagccatc

## Peptide evidence:

AATSVLSDGWTVTVK  
AVRPGATLGDIGASIQQLAEGAGFSVVR  
VIPANIGYHGTR

## Current sequence (peptide evidence in red): 261aa

MTEVKIHSPAIEIMARAAGQAAAKVLEMIPYVLAGITDDEIDRLCHDYIVNELKVIPANIGYHGTRTVCTSVNHVVCHGIPSDKLLKNGDIVNIDVAIIKEGWYGDTSRMYFVGEPVRAKRLVDITYQSMVAGIKAVRPGATLGDIGASIQQLAEGAGFSVVR EYCGHGVGQEYHTAPQVLHYGIAQTGMLLKPGMIFTI EPIEMINAGKAATSVLSDGWTVTVKDRSLSAQWEHTIAVTESGYDLLTPWPEGTEYEAI

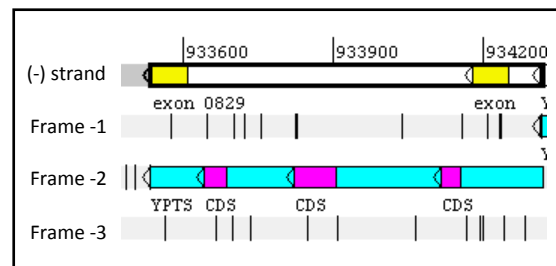

# Error 63

Strain: *Y. pestis pestoides F*  
Gene: YPDSF\_3360 / YPDSF\_3361  
Oligo evidence:

Classification: expressed pseudogene  
Boundaries of gene: Frame-1: complement(3848809..3849825)  
Frame-2: complement(3848108..3848809)

cagtatgtcgataatgtactgaacaaagcatcagatacttatcacggtgataaacctagccattgctgg  
ttatcgaattacactctgccacgtgatggttattacggcaaaaaaggatcgtactcaagccttataag

Peptide evidence:

HGEYGKPMGALWESTFEQQPPFFATK

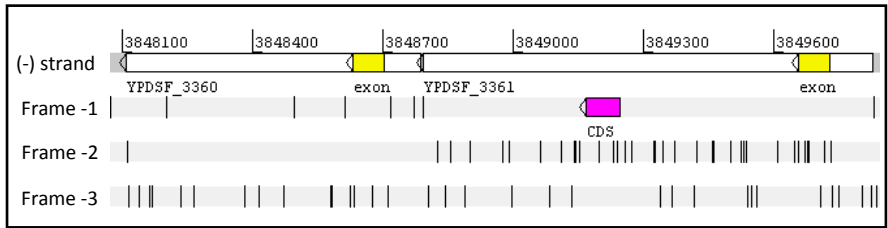

Proposed sequence (peptide evidence in red): 572aa

Frame-1: 339aa

MKKRALLLSMSVLAMLYIPAGQAAEIDRLTVVKQYVDNVLNKASDTHGDKPSPLLADGVDPRTGQQMEWIFPDGRRVLSNFSQQNLMRVMGSLSESGDPQYQKRAEDIVRYHFQNYQDNSGLLYWGGHRRFVDLTKLQPEGPSEKEKVELKNAYPYDLMFVSDSDATTRFIRGFVNAHVYDWRILETSRHGEYGKPMGALWESTFEQQPPFFATKGLSFLNAGNDLIYSASLLYKQQDQGALVWAKRLADQYVLPDAKTGLGVYQFTQALKREEPTDDADTHSKFGDRAQRQFGPEFGPTALEGNMMLKGRSTSTLYSENALMQLQLGKDLGG

Frame-2: 233aa

QGDDLKWTVDGLKAFKAGYGYNEQDNTFRPMIANGQDLSNYTLPRDGYGKKGSVLKPYPYKAGNEFLISYARAYAVDNDPLLWKVARGIASDQGLGDIGSAPGKEMKVKLDTTNSDPYALFALLDLYNASQVAEYRSLAEKVADNIIKTRYIDGFFMASPDRQYADVDAIEPYALLALEASLRNKQAVAPFLNGAGFTGAYLMADGSARISTRDNELFLNNGVETLQPNGRK

Strain: *Y. pestis CO92*  
Gene: YPO3994

Classification: annotated as periplasmic pectate lyase precursor  
Boundaries of gene: 4500698..4502416

Oligo evidence:

cagtatgtcgataatgtactgaacaaagcatcagatacttatcacggtgataaacctagccattgctgg  
ttatcgaattacactctgccacgtgatggttattacggcaaaaaaggatcgtactcaagccttataag

Peptide evidence:

DTTNSDPYALFALLDLYNASQVAEYR

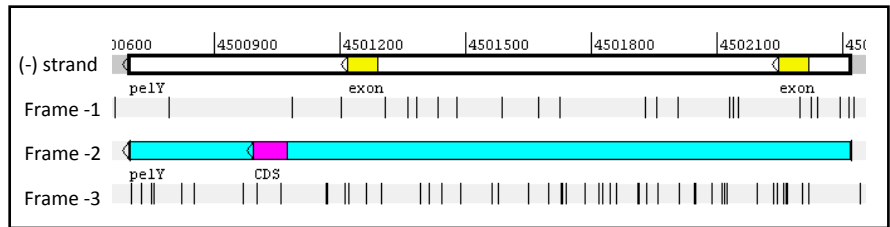

Current sequence (peptide evidence in red): 572aa

MKKRALLLSMSVLAMLYIPAGQAAEIDRLTVVKQYVDNVLNKASDTHGDKPSPLLADGVDPRTGQQMEWIFPDGRRVLSNFSQQNLMRVMGSLSESGDPQYQKRAEDIVRYHFQNYQDNSGLLYWGGHRRFVDLTKLQPEGPSEKEKVELKNAYPYDLMFVSDSDATTRFIRGFVNAHVYDWRILETSRHGEYGKPMGALWESTFEQQPPFFATKGLSFLNAGNDLIYSASLLYKQQDQGALVWAKRLADQYVLPDAKTGLGVYQFTQALKREEPTDDADTHSKFGDRAQRQFGPEFGPTALEGNMMLKGRSTSTLYSENALMQLQLGKDLGGQDDLKWTVDGLKAFKAGYGYNEQDNTFRPMIANGQDLSNYTLPRDGYGKKGSVLKPYPYKAGNEFLISYARAYAVDNDPLLWKVARGIASDQGLGDIGSAPGKEMKVKLDTTNSDPYALFALLDLYNASQVAEYRSLAEKVADNIIKTRYIDGFFMASPDRQYADVDAIEPYALLALEASLRNKQAVAPFLNGAGFTGAYLMADGSARISTRDNELFLNNGVETLQPNGRK

Strain: *Y. pseudotuberculosis PB1/+*  
Gene: YPTS\_4050

Classification: annotated as periplasmic pectate lyase  
Boundaries of gene: 4523321..4525039

Oligo evidence:

cagtatgtcgataatgtactgaacaaagcatcagatacttatcacggtgataaacctagccattgctgg  
ttatcgaattacactctgccacgtgatggttattacggcaaaaaaggatcgtactcaagccttataag

Peptide evidence:

NA

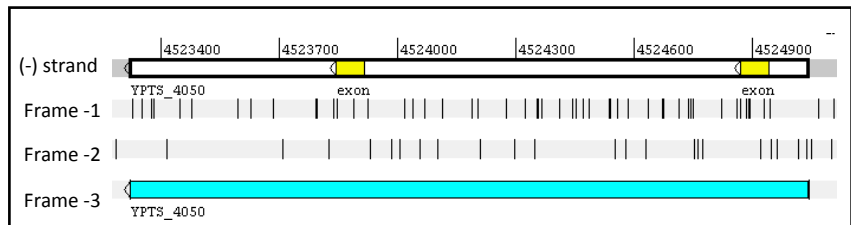

Current sequence (peptide evidence in red): 572aa

MKKRALLLSMSVLAMLYIPAGQAAEIDRLTVVKQYVDNVLNKASDTHGDKPSPLLADGVDPRTGQQMEWIFPDGRRVLSNFSQQNLMRVMGSLSESGDPQYQKRAEDIVRYHFQNYQDNSGLLYWGGHRRFVDLTKLQPEGPSEKEKVELKNAYPYDLMFVSDSDATTRFIRGFVNAHVYDWRILETSRHGEYGKPMGALWESTFEQQPPFFATKGLSFLNAGNDLIYSASLLYKQQDQGALVWAKRLADQYVLPDAKTGLGVYQFTQALKREEPTDDADTHSKFGDRAQRQFGPEFGPTALEGNMMLKGRSTSTLYSENALMQLQLGKDLGGQDDLKWTVDGLKAFKAGYGYNEQDNTFRPMIANGQDLSNYTLPRDGYGKKGSVLKPYPYKAGNEFLISYARAYAVDNDPLLWKVARGIASDQGLGDIGSAPGKEMKVKLDTTNSDPYALFALLDLYNASQVAEYRSLAEKVADNIIKTRYIDGFFMASPDRQYADVDAIEPYALLALEASLRNKQAVAPFLNGAGFTGAYLMADGSARISTRDNELFLNNGVETLQPNGRK

# Error 64

Strain: *Y. pestis pestoides F*  
 Gene: YPDSF\_3740 / YPDSF\_3741

Classification: expressed pseudogene/ frameshift  
 Boundaries of gene Frame+3: 4298835..4299173  
 Frame+2: 4299179..4299652

Oligo evidence:

aaaccgctgaggaagctatTTTgcccacgtctggcccgcgaagccttgaatccattgggtaaaact  
 ttgggtaaaactggaaattcatccagatgtgagatatttctgctgacctgacccgatagaacgctcaaggcc  
 aagtctgggtgaaagagggtttgtttaccacccctctgtgtaaacgactggaagaagtgggt  
 ttggctgggctggcgcttcaccgttcaatccttcacaacctgatacattacaactacggccaccgcccac

Peptide evidence:

FSSPELMLEALRASGSQLITMAMK  
 NAQGRRSAGERGVCCFTDPVLCKRLEEVGCAAVMPLGSP

Proposed sequence (peptide evidence in red):

Frame3: 109aa

MLKIADTTFTSRLFTGTGK**FSSPELMLEALRASGSQLITMAMK**RVDLQSGNDAILAPLRQLGVRLPNTSGAKTAEFAARLAREALNTHVWVLEIHPDVRYLLPD

Frame2: 156aa

**NAQGRRSAGERGVCCFTDPVLCKRLEEVGCAAVMPLGSP**IGSNLGLRTRDFLQIIIEQSKVPVVVDAGIGAPSHALEALELGADAVLVNTAIAVAHSPVQMAHAFRLAVESGERARLA  
 GLGASPFNPSPDPTLQLRATATSPLTGFLSQLEEQDHV

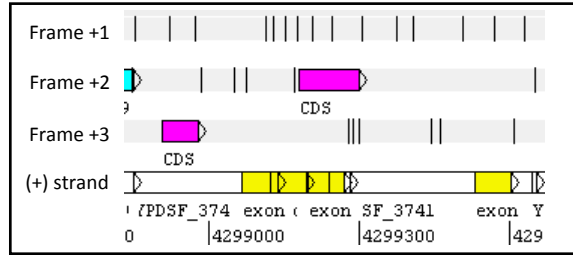

Strain: *Y. pestis CO92*  
 Gene: YPO3742

Classification: annotated as thiazole synthase ThiG  
 Boundaries of gene: 4194309..4195124

Oligo evidence:

aaaccgctgaggaagctatTTTgcccacgtctggcccgcgaagccttgaatccattgggtaaaact  
 ttggctgggctggcgcttcaccgttcaatccttcacaacctgatacattacaactacggccaccgcccac

Peptide evidence:

TRDFLQIIIEQSK

Current sequence (peptide evidence in red): 271aa

MLKIADTTFTSRLFTGTGK**FSSPELMLEALRASGSQLITMAMK**RVDLQSGNDAILAPLRQLGVRLPNTSGAKTAEFAARLAREALNTHVWVLEIHPDVRYLLPDPIETLKAAEVLVKEGFV  
 VLPYCGADPVLCKRLEEVGCAAVMPLGSPIGSNLGLR**TRDFLQIIIEQSK**VPVVVDAGIGAPSHALEALELGADAVLVNTAIAVAHSPVQMAHAFRLAVESGERARLAGLGASPFNPSPDPTL  
 QLRATATSPLTGFLSQLEEQDHV

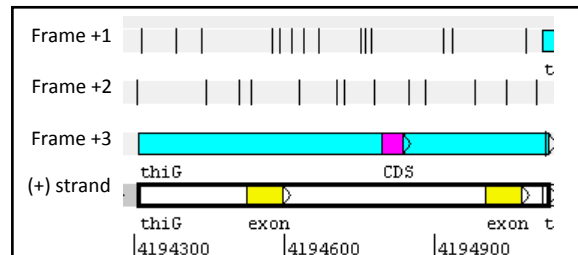

Strain: *Y. pseudotuberculosis PB1/+*  
 Gene: YPTS\_0307

Classification: annotated as thiazole synthase  
 Boundaries of gene: complement (340282..341097)

Oligo evidence:

aaaccgctgaggaagctatTTTgcccacgtctggcccgcgaagccttgaatccattgggtaaaact  
 ttgggtaaaactggaaattcatccagatgtgagatatttctgctgacctgacccgatagaacgctcaaggcc  
 ttggctgggctggcgcttcaccgttcaatccttcacaacctgatacattacaactacggccaccgcccac

Peptide evidence:

NA

Current sequence (peptide evidence in red): 271aa

MLKIADTTFTSRLFTGTGK**FSSPELMLEALRASGSQLITMAMK**RVDLQSGNDAILAPLRQLGVRLPNTSGAKTAEFAARLAREALNTHVWVLEIHPDVRYLLPDPIETLKAAEVLVKEGFV  
 VLPYCGADPVLCKRLEEVGCAAVMPLGSPIGSNLGLRTRDFLQIIIEQSKVPVVVDAGIGAPSHALEALELGADAVLVNTAIAVAHSPVQMAHAFRLAVESGERARLAGLGASPFNPSPDPTL  
 QLRATATSPLTGFLSQLEEQDHV

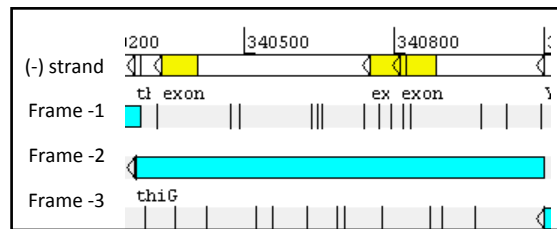



# Error 65

Strain: *Y. pestis* pestoides F  
Gene: YPDSF\_3742/YPDSF\_3743

Classification: expressed pseudogene  
Boundaries of gene: Frame3: 4299630..4300193  
Frame1: 4300198..4300776

Oligo evidence:  
ggcagaagatgaatatactgaattaaaggcgtgggattagatggcgtgatggtttatcaggataaccta

Peptide evidence:

DNVIPVAINNVSAGSKTQPGGYADDHPELEQF

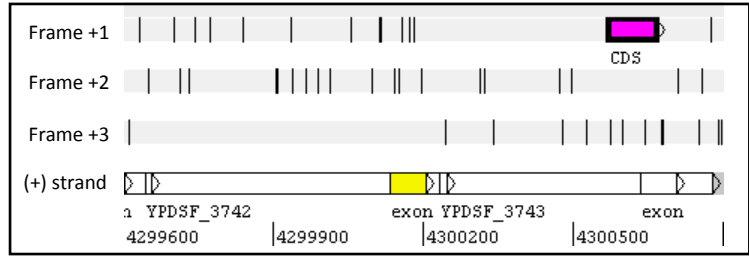

Proposed sequence (peptide evidence in red):

Frame3: 188aa

LRSKTMSDFNQWQLDWDISLTINSKPADVERALNAIKPTREDLMALISPAALAYLEPMAKQAQQLTRQRFGNTVSFYVPLYSNLCANDCTYCGFSMSNRIKRTLDEAEIIRECEAIK  
ALGFEHLLVTGEHQTKVGMDFYRRHLPTIRSRFSSLMMEVQPLAEDEYTELKALGLDGMVMVYQ

Frame1: 192aa

TYHPATYQQHHLRGHKQDFHWRLATPDLRGRAGIDKIGLGLIGLSNSWRDCYMLAEHLFYLQQTWQTRYISIFPRLRPCAGGIEPASIMSEPQLLQLICAFRLFAPDVLSLSTRESPFFR  
DNVIPVAINNVSAGSKTQPGGYADDHPELEQFAPHDNRSPEQVAQALTKAGLQPVWKDWDSHLGRSLR

Strain: *Y. pestis* CO92  
Gene: YPO3743

Classification: annotated as thiH  
Boundaries of gene: 4195117..4196247

Oligo evidence:  
tgccgatgatcatcccgaactggaacaatttcgccccatgataaccgctccccggaacaggtcgcaaaa

Peptide evidence:

DNVIPVAINNVSAGSKTQPGGYADDHPELEQF

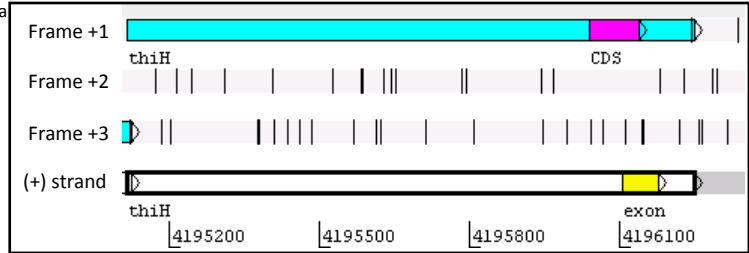

Current sequence (peptide evidence in red): 376aa

MSEDFNQWQLDWDISLTINSKPADVERALNAIKPTREDLMALISPAALAYLEPMAKQAQQLTRQRFGNTVSFYVPLYSNLCANDCTYCGFSMSNRIKRTLDEAEIIRECEAIKALGFE  
HLLLVTEHQTKVGMDFYRRHLPTIRSRFSSLMMEVQPLAEDEYTELKALGLDGMVMVYQETYHPATYQQHHLRGHKQDFHWRLATPDLRGRAGIDKIGLGLIGLSNSWRDCYMLAEHL  
FYLQQTWQTRYISIFPRLRPCAGGIEPASIMSEPQLLQLICAFRLFAPDVLSLSTRESPFFRDNVIPVAINNVSAGSKTQPGGYADDHPELEQFAPHDNRSPEQVAQALTKAGLQPVWKDW  
DSHLGRSLR

Strain: *Y. pseudotuberculosis* PB1/+  
Gene: YPTS\_0306

Classification: annotated as thiamine biosynthesis protein ThiH  
Boundaries of gene: complement (339159..340289)

Oligo evidence:  
tgccgatgatcatcccgaactggaacaatttcgccccatgataaccgctccccggaacaggtcgcaaaa

Peptide evidence:

LRPCAGGIEPASIMSEPQLLQLICAF

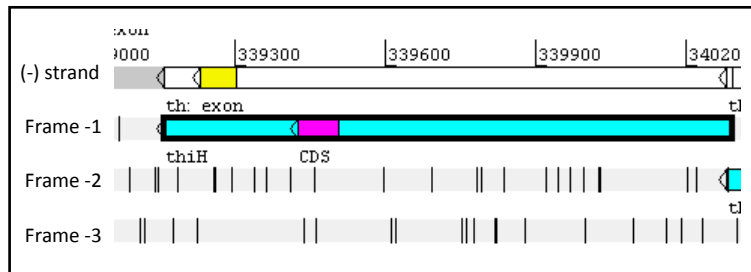

Current sequence (peptide evidence in red): 376aa

MSEDFNQWQLDWDISLTINSKPADVERALNAIKPTREDLMALISPAALAYLEPMAKQAQQLTRQRFGNTVSFYVPLYSNLCANDCTYCGFSMSNRIKRTLDEAEIIRECEAIKALGFE  
HLLLVTEHQTKVGMDFYRRHLPTIRSRFSSLMMEVQPLAEDEYTELKALGLDGMVMVYQETYHPATYQQHHLRGHKQDFHWRLATPDLRGRAGIDKIGLGLIGLSNSWRDCYMLAEHL  
FYLQQTWQTRYISIFPRLRPCAGGIEPASIMSEPQLLQLICAFRLFAPDVLSLSTRESPFFRDNVIPVAINNVSAGSKTQPGGYADDHPELEQFAPHDNRSPEQVAQALTKAGLQPVWKDW  
DSHLGRSLR

# Errors 66/67

Strain: Y. pestis pestoides F  
Gene: YPDSF\_3897/ YPDSF\_3896

Classification: expressed pseudogenes  
Boundaries of gene: complement (4474104..4475030)

## Oligo evidence:

ttaagggggcaactaccggtgtggcattgatcttcgtgaatagcgtatggcgaaaatgtgattgtattaa  
aggcattgctaccgtgatcatcaccttaggtagcgtggcgtatggctcagtgaacaaggtaaaggttaa

## Peptide evidence:

QQLTADKIDTQPIEAIK  
AAQILHDK  
FAHAAAAIAVTRPGAQPSIPWR

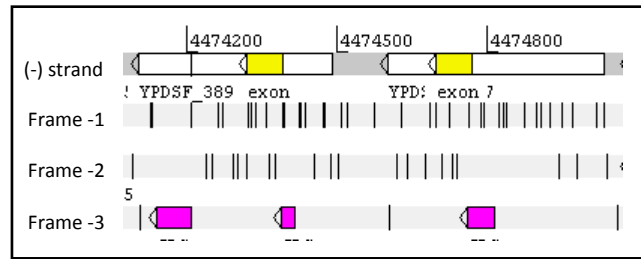

## Proposed sequence (peptide evidence in red): 308aa

METGKLVVLSINADHILNIEQFPRPGETVIGQQYNVAFGGKGANQAVAAGRSGADIAFIACVGGDDIGERVRRQLTADKIDTQPIEAIK GATTGVALIFVNSDGENVIGINAGANSAVTPEYL  
RRYQQQVIDADALLMQLE+PLD TVIAAAK LAKHQ TQVILNPAPARKLPDELLTVDMITPNETEAE RL TGIHIEQDDAAKAAQILHDKGIATVIITLGSRGVWVLS EQGKGLVAGFKVNAV  
DTIAAGDTFNGALLTALLEGQSM DVAVRFAHAAAAIAVTRPGAQPSIPWR AEIDSLQERV

Strain: Y. pestis CO92  
Gene: YPO0008

Classification: annotated as rbsK  
Boundaries of gene: 8366..9292

## Oligo evidence:

ttaagggggcaactaccggtgtggcattgatcttcgtgaatagcgtatggcgaaaatgtgattgtattaa  
aggcattgctaccgtgatcatcaccttaggtagcgtggcgtatggctcagtgaacaaggtaaaggttaa

## Peptide evidence:

FAHAAAAIAVTRPGAQPSIPWR  
GANQAVAAGR  
KLPDELLTVDMITPNETEAEER  
QHQTQVILNPAPAR  
YQQQVIDADALLMQLESPLD TVIAAAK

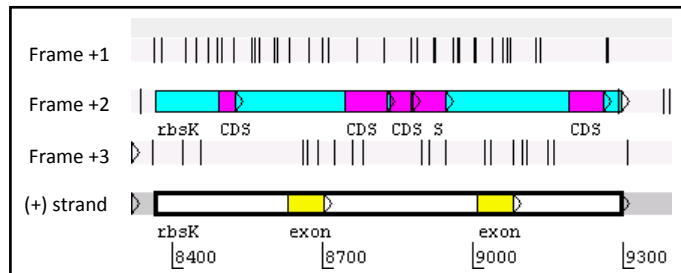

## Current sequence (peptide evidence in red): 308aa

METGKLVVLSINADHILNIEQFPRPGETVIGQQYNVAFGGKGANQAVAAGRSGADIAFIACVGGDDIGERVRRQLTADKIDTQPIEAIK GATTGVALIFVNSDGENVIGINAGANSAVTPEYL  
RRYQQQVIDADALLMQLESPLD TVIAAAK LAKHQ TQVILNPAPARKLPDELLTVDMITPNETEAE RL TGIHIEQDDAAKAAQILHDKGIATVIITLGSRGVWVLS EQGKGLVAGFKVNAV  
DTIAAGDTFNGALLTALLEGQSM DVAVRFAHAAAAIAVTRPGAQPSIPWR AEIDSLQERV

Strain: Y. pseudotuberculosis PB1/+  
Gene: YPTS\_4163

Classification: annotated as ribokinase  
Boundaries of gene: 4652302..4653228

## Oligo evidence:

ttaagggggcaactaccggtgtggcattgatcttcgtgaatagcgtatggcgaaaatgtgattgtattaa

## Peptide evidence:

FAHAAAAIAVTRPGAQPSIPWR  
KLPDELLTVDMITPNETEAEER  
LTGIHIEQDDAAK  
QHQTQVILNPAPAR  
QQLTADKIDTQPIEAIK  
RYQQQVIDADALLMQLESPLD TVIAAAK  
VNAVDTIAAGDTFNGALLTALLEGQSM DAAVR  
YQQQVIDADALLMQLESPLD TVIAAAK

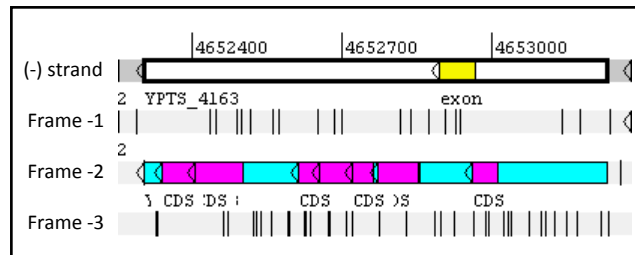

## Current sequence (peptide evidence in red): 308aa

METGKLVVLSINADHILNIEQFPRPGETVIGQQYNVAFGGKGANQAVAAGRSGADIAFIACVGGDDIGERVRRQLTADKIDTQPIEAIK GATTGVALIFVNSDGENVIGINAGANSAVTPEYL  
RRYQQQVIDADALLMQLESPLD TVIAAAK LAKHQ TQVILNPAPARKLPDELLTVDMITPNETEAE RL TGIHIEQDDAAKAAQILHDKGIATVIITLGSRGVWVLS EQGKGLVAGFKVNAV  
DTIAAGDTFNGALLTALLEGQSM DAAVRFAHAAAAIAVTRPGAQPSIPWR AEIDSLQERV

# Error 68

Strain: *Y. pestis pestoides F*  
Gene: YPDSF\_0150.5

Classification: novel gene  
Boundaries of gene: 156733..156909

Oligo evidence:

tagagcgtgaggatactcctgctgctggtatgggtcaactggtttcctacatgggttaaagttgagga

Peptide evidence:

GMVNLVSYMVK  
HKATLIGLGLR  
IGHTVEREDTPAVR  
RIGHTVER  
RIGHTVEREDTPAVR  
VTQTKSSIGR

Proposed sequence (peptide evidence in red): 59aa

MAKTIK**VTQTKSSIGRLPKHKATLIGLGLRRIGHTVEREDTPAVRGMVNLVSYMVKVEE**

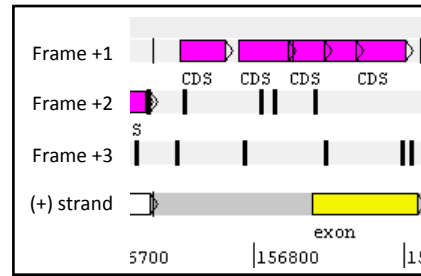

Strain: *Y. pestis CO92*  
Gene: YPO0227

Classification: annotated as rpmD  
Boundaries of gene: 230222..230401

Oligo evidence:

tagagcgtgaggatactcctgctgctggtatgggtcaactggtttcctacatgggttaaagttgagga

Peptide evidence:

GMVNLVSYMVK  
GMVNLVSYMVKVEE  
HKATLIGLGL  
HKATLIGLGLR  
IGHTVER  
IGHTVEREDTPAVR  
MVNLVSYMVK  
RIGHTVER  
RIGHTVEREDTPAVR

Current sequence (peptide evidence in red): 59aa

MAKTIK**VTQTKSSIGRLPKHKATLIGLGLRRIGHTVEREDTPAVRGMVNLVSYMVKVEE**

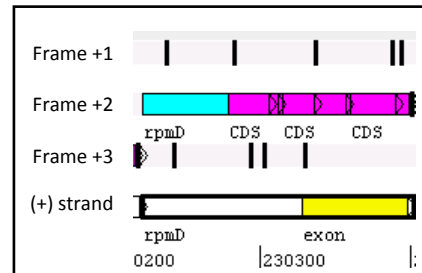

Strain: *Y. pseudotuberculosis PB1/+*  
Gene: YPTS\_3872

Classification: annotated as 50S ribosomal protein L30  
Boundaries of gene: complement (4319871..4320050)

Oligo evidence:

tagagcgtgaggatactcctgctgctggtatgggtcaactggtttcctacatgggttaaagttgagga

Peptide evidence:

GMVNLVSYMVK  
GMVNLVSYMVKVEE  
HKATLIGLGLR  
IGHTVEREDTPAVR  
RIGHTVER  
RIGHTVEREDTPAVR

Current sequence (peptide evidence in red): 59aa

MAKTIK**VTQTKSSIGRLPKHKATLIGLGLRRIGHTVEREDTPAVRGMVNLVSYMVKVEE**

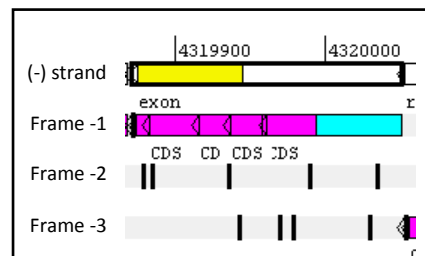

# Error 70

Strain: *Y. pestis* pestoides F  
Gene: YPDSF\_1419.5

Classification: novel gene  
Boundaries of gene: complement (1594488..1594703)

Oligo evidence:

ttacaccgctcttattccccacttacgtatcccaggcagatcacgaagttccccgtcactttaaccgc

Peptide evidence:

CETFANRVEGMGR

Proposed sequence (peptide evidence in red): 71aa

MGQLFILAPVPTGMRCTCSDYGAAGMANTRYTALISPLTYPRQIRSFVTFNRCETFANRVEGMGRNLNHGA

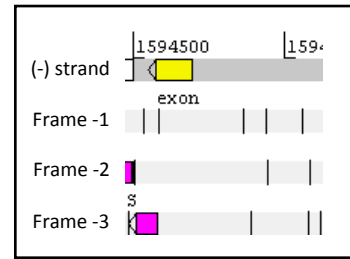

---

# Error lacking threshold of evidence

Strain: *Y. pestis* CO92  
Gene: YPO1556.5

Classification: novel gene  
Boundaries of gene: 1771564..1771779

Oligo evidence:

ttacaccgctcttattccccacttacgtatcccaggcagatcacgaagttccccgtcactttaaccgc

Peptide evidence:

NA

Proposed sequence (peptide evidence in red): 71aa

MGQLFILAPVPTGMRCTCSDYGAAGMANTRYTALISPLTYPRQIRSFVTFNRCETFANRVEGMGRNLNHGA

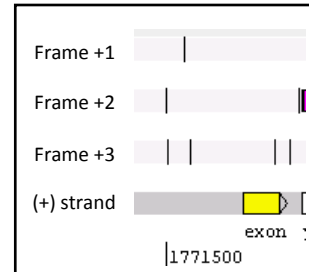

---

Strain: *Y. pseudotuberculosis* PB1/+  
Gene: YPTS\_1679

Classification: annotated as hypothetical protein  
Boundaries of gene: 1888418..1888633

Oligo evidence:

ttacaccgctcttattccccacttacgtatcccaggcagatcacgaagttccccgtcactttaaccgc

Peptide evidence:

NA

Current sequence (peptide evidence in red): 71aa

MGQLFILAPVPTGMRCTCSDYGAAGMANTRYTALISPLTYPRQIRSFVTFNRCETFANRVEGMGRNLNHGA

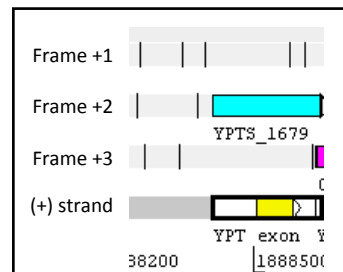

# Error 71

Strain: *Y. pestis* pestoides F  
Gene: YPDSF\_1512.5

Classification: novel gene  
Boundaries of gene: complement (1710507..1710755)

## Oligo evidence:

gtactgagctaaaaaatattaatctataaacggactgattgatctgtttgtaacgagcagttcagaatc

## Peptide evidence:

HIVNSIDGAK  
SINGLIDLFTSSSES

Proposed sequence (peptide evidence in red): 82aa

MDRDHIASIVKKHIVNSIDGAK EHEIDLQKSMADYGASSLDIVSVVSGVMRELKIKIPRTELKNIK SINGLIDLFTSSSES

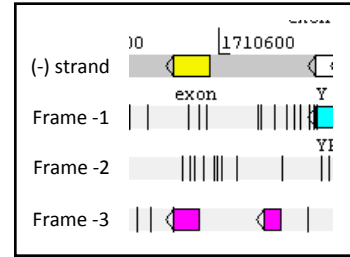

Strain: *Y. pestis* CO92  
Gene: YPO1462

Classification: annotated as putative acyl carrier protein  
Boundaries of gene: 1654210..1654458

## Oligo evidence:

gtactgagctaaaaaatattaatctataaacggactgattgatctgtttgtaacgagcagttcagaatc

## Peptide evidence:

HIVNSIDGAKEHEIDLQK

Current sequence (peptide evidence in red): 82aa

MDRDHIASIVKKHIVNSIDGAKEHEIDLQKSMADYGASSLDIVSVVSGVMRELKIKIPRTELKNIK SINGLIDLFTSSSES

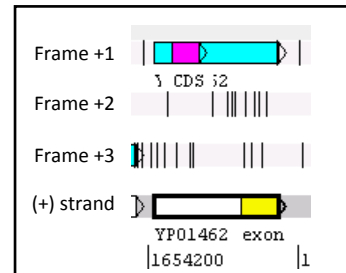

Strain: *Y. pseudotuberculosis* PB1/+  
Gene: YPTS\_1587

Classification: annotated as putative acyl carrier protein  
Boundaries of gene: 1773856..1774104

## Oligo evidence:

gtactgagctaaaaaatattaatctataaacggactgattgatctgtttgtaacgagcagttcagaatc

## Peptide evidence:

HIVNSIDGAKEHEIDLQK  
MDRDHIASIVKK

Current sequence (peptide evidence in red): 82aa

MDRDHIASIVKKHIVNSIDGAKEHEIDLQKSMADYGASSLDIVSVVSGVMRELKIKIPRTELKNIK SINGLIDLFTSSSES

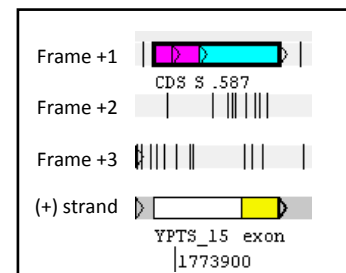

## Error 72

Strain: *Y. pestis* pestoides F  
Gene: YPDSF\_1707.5

Classification: novel gene  
Boundaries of gene: complement (1919272..1919697)

Oligo evidence:

tcaatttctgaacagggatataataatgaccaagagctgtttaatacacttcaccgttaacctcaact  
ttcaccgtttaacctcaactccacagcgaacgagttaacaagcacactcctgagcaattactgtctg  
atttctcataaatttaagatagccgctgattctgagatcagaattccaactgcagatgacttatatc

Peptide evidence:

LTFSPDNASFSWQ

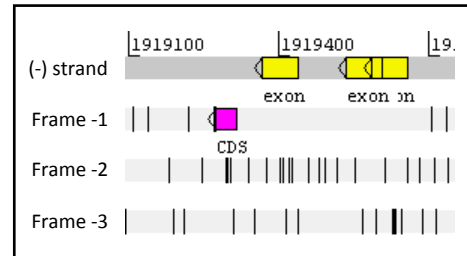

Proposed sequence (peptide evidence in red): 141aa

LLVKFKNRHAVAFNQFLNRDIIMTKSLFNHLRSTSTANELTKHTPEQLLWVAQGCMLEGLPDQFYEFIECIQCQTEDGKQRLDISHKFKIAADSEYQNFQPADDLYPAQCIEQALEGKQ  
WSKARLTFSPDNASFSWQ

Strain: *Y. pestis* CO92  
Gene: YPO0791

Classification: annotated as hypothetical protein  
Boundaries of gene: complement(867363..867788)

Oligo evidence:

tcaatttctgaacagggatataataatgaccaagagctgtttaatacacttcaccgttaacctcaact  
ttcaccgtttaacctcaactccacagcgaacgagttaacaagcacactcctgagcaattactgtctg  
atttctcataaatttaagatagccgctgattctgagatcagaattccaactgcagatgacttatatc

Peptide evidence:

NA

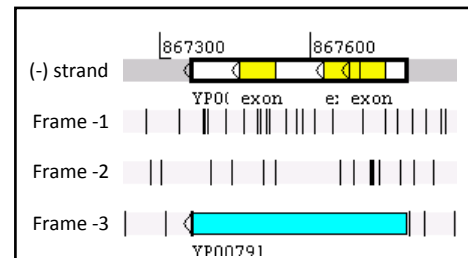

Current sequence (peptide evidence in red): 141aa

LLVKFKNRHAVAFNQFLNRDIIMTKSLFNHLRSTSTANELTKHTPEQLLWVAQGCMLEGLPDQFYEFIECIQCQTEDGKQRLDISHKFKIAADSEYQNFQPADDLYPAQCIEQALEGKQ  
WSKARLTFSPDNASFSWQ

## Error 98

Strain: *Y. pseudotuberculosis* PB1/+  
Gene: YPTS\_3161

Classification: upstream start site  
Boundaries of gene: complement (3501896..3502321)

Oligo evidence:

tcaatttctgaacagggatataataatgaccaagagctgtttaatacacttcaccgttaacctcaact  
ttcaccgtttaacctcaactccacagcgaacgagttaacaagcacactcctgagcaattactgtctg  
atttctcataaatttaagatagccgctgattctgagatcagaattccaactgcagatgacttatatc

Peptide evidence:

LTSTSTANELTK

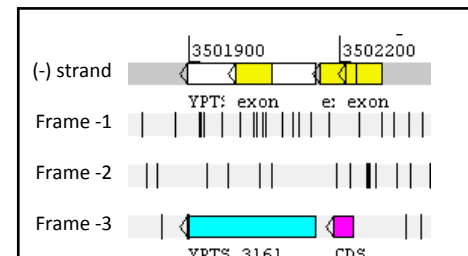

Proposed sequence (peptide evidence in red): 141aa

LLVKFKNRHAVAFNQFLNRDIIMTKSLFNHLRSTSTANELTKHTPEQLLWVAQGCMLEGLPDQFYEFIECIQCQTEDGKQRLDISHKFKIAADSEYQNFQPADDLYPAQCIEQALEGKQ  
WSKARLTFSPDNASFSWQ

# Error 74

Strain: *Y. pestis* pestoides F  
Gene: YPDSF\_2438.5

Classification: novel gene  
Boundaries of gene: 2779318..2779680

Oligo evidence:

tttcttgcttctgacaccatactgattacgcttcccagcttacatcaacaacatattgatcttatt

Peptide evidence:

DISLYLASQNIK  
HIDLIWR  
ITVGYHSFLLPDTHTDYAFPAYINK

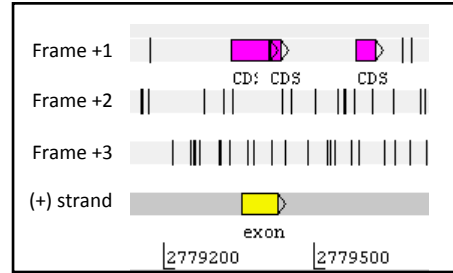

Proposed sequence (peptide evidence in red): 120aa

MTSAIKIT**VGYHSFLLPDTHTDYAFPAYINK**HIDLIWR~~YIENNDKIEELSSNPFSKGR~~TAVLVKAKFLSSELKEFKLKTGIIGYPFDMKDISLYLASQNIKITLCTEFKRNGTLVNSLPS

Strain: *Y. pestis* CO92  
Gene: YPO1255

Classification: annotated as hypothetical protein  
Boundaries of gene: complement (1413073..1413522)

Oligo evidence:

tttcttgcttctgacaccatactgattacgcttcccagcttacatcaacaacatattgatcttatt

Peptide evidence:

AKFLSSELKEFK  
ITVGYHSFLLPDTHTDYAFPAYINK

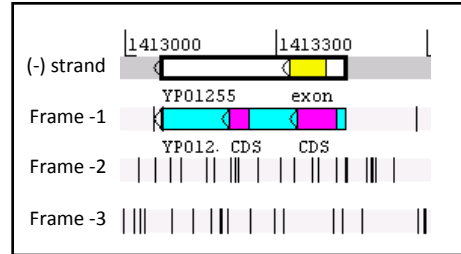

Current sequence (peptide evidence in red): 120 aa

MTSAIKIT**VGYHSFLLPDTHTDYAFPAYINK**HIDLIWR~~YIENNDKIEELSSNPFSKGR~~TAVLVK**AKFLSSELKEFK**LKTGIIGYPFDMKDISLYLASQNIKITLCTEFKRNGTLVNSLPS

Strain: *Y. pseudotuberculosis* PB1/+  
Gene: YPTS\_1381

Classification: annotated as hypothetical protein  
Boundaries of gene: complement (1538397..1538801)

Oligo evidence:

tttcttgcttctgacaccatactgattacgcttcccagcttacatcaacaacatattgatcttatt

Peptide evidence:

AKFLSSELKEFK

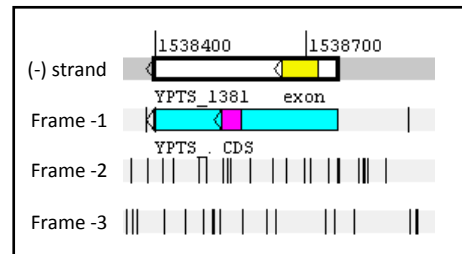

Current sequence (peptide evidence in red): 120aa

MTSAIKITVGYHSFLLPDTHTDYAFPAYINKHIDLIWR~~YIENNDKIEELSSNPFSKGR~~TAVLVK**AKFLSSELKEFK**LKTGIIGYPFDMKDISLYLASQNIKITLCTEFKRNGTLVNSLPS

# Error 75

Strain: Y. pestis pestoides F  
Gene: YPDFS\_2615.5

Classification: novel gene  
Boundaries of gene: complement (2961352..2961603)

Oligo evidence:

acaccaaatcagacaagtggggaaatggagcataaagcatctgctgcactcgataatccacgttccagtg

Peptide evidence:

QLAASVLAQANK  
TLNDPNSSAIQR  
SLAGSALSQR

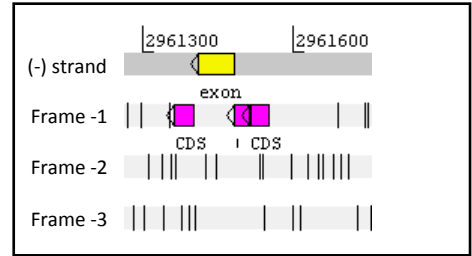

Proposed sequence (peptide evidence in red): 83aa

MSKNTKQTSQKVASIAAK**TLNDPNSSAIQRSLAGSALSQR**GTPNQTSQKEMEHKASAALDNPRSSALTK**QLAASVLAQANK**DRK

# Error 41

Strain: Y. pestis C092  
Gene: YPO2638.5

Classification: novel gene  
Boundaries of gene: 2967439..2967690

Oligo evidence:

acaccaaatcagacaagtggggaaatggagcataaagcatctgctgcactcgataatccacgttccagtg

Peptide evidence:

LNDPNSSAIQR  
QLAASVLAQANK  
SLAGSALSQR  
TLNDPNSSAIQR

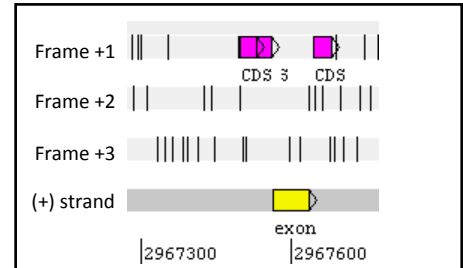

Proposed sequence (peptide evidence in red): 83aa

MSKNTKQTSQKVASIAAK**TLNDPNSSAIQRSLAGSALSQR**GTPNQTSQKEMEHKASAALDNPRSSALTK**QLAASVLAQANK**DRK

Strain: Y. pseudotuberculosis  
Gene: YPTS\_1189

Classification: annotated as hypothetical protein  
Boundaries of gene: 1338362..1338613

Oligo evidence:

acaccaaatcagacaagtggggaaatggagcataaagcatctgctgcactcgataatccacgttccagtg

Peptide evidence:

QLAASVLAQANK  
SLAGSALSQR  
TLNDPNSSAIQR

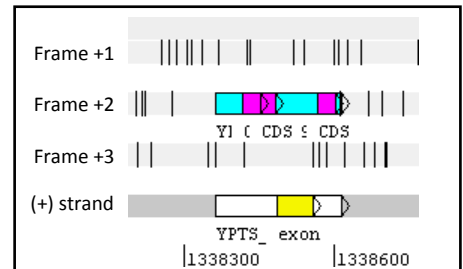

Current sequence (peptide evidence in red): 83aa

MSKNTKQTSQKVASIAAK**TLNDPNSSAIQRSLAGSALSQR**GTPNQTSQKEMEHKASAALDNPRSSALTK**QLAASVLAQANK**DRK



# Error 76

Strain: *Y. pestis* pestoides F  
Gene: YPDFS\_2706.5

Classification: novel gene  
Boundaries of gene: 3072771..3073109

Oligo evidence:

agaagcatgaagaatcgtaaagaacgtcccctcttgatggtcgttaccggctgggaaaaagccgctg  
cgtaccggctgggaaaaagccgctgcctatgaacaaatcgcccagatctgaaatcgttattgagaaaa

Peptide evidence:

MITHSPHTIASR

Proposed sequence (peptide evidence in red): 112aa

**MITHSPHTIASR**TEICIGCFVPGVLGGFEVRSMKNRKERPLLMVVRTGWKEAAAYEQIRPVSEIVIEKNGQSRPVNQAFFWNDLQDTSIDFSQKAVDLFFSKKGTLSACHPI

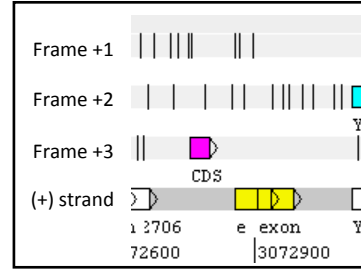

Strain: *Y. pestis* CO92  
Gene: YPO2820

Classification: annotated as hypothetical protein  
Boundaries of gene: 3149886..3150224

Oligo evidence:

agaagcatgaagaatcgtaaagaacgtcccctcttgatggtcgttaccggctgggaaaaagccgctg  
cgtaccggctgggaaaaagccgctgcctatgaacaaatcgcccagatctgaaatcgttattgagaaaa

Peptide evidence:

MITHSPHTIASR

Current sequence (peptide evidence in red): 112aa

**MITHSPHTIASR**TEICIGCFVPGVLGGFEVRSMKNRKERPLLMVVRTGWKEAAAYEQIRPVSEIVIEKNGQSRPVNQAFFWNDLQDTSIDFSQKAVDLFFSKKGTLSACHPI

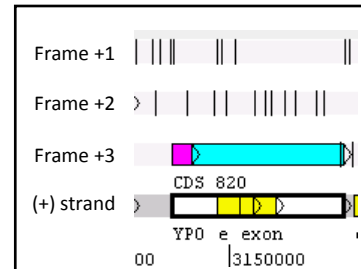

# Error 101

Strain: *Y. pseudotuberculosis* PB1/+  
Gene: YPTS\_1089

Classification: **error**: annotated as hypothetical protein; upstream start site  
Boundaries of gene: complement (1229284..1229619)

Oligo evidence:

agaagcatgaagaatcgtaaagaacgtcccctcttgatggtcgttaccggctgggaaaaagccgctg  
cgtaccggctgggaaaaagccgctgcctatgaacaaatcgcccagatctgaaatcgttattgagaaaa

Peptide evidence:

MITHSPHTIASR

Proposed sequence (peptide evidence in red): 112aa (existing sequence underlined)

**MITHSPHTIASR**TEICIGCFVPGVLGGFEVRSMKNRKERPLLMVVRTGWKEAAAYEQIRPVSEIVIEKNGQSRPVNQAFFWNDLQDTSIDFSQKAVDLFFSKKGTLSACHPI

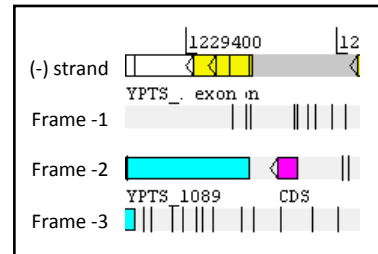

# Error 78

Strain: Y. pestis pestoides F  
Gene: YPDFS\_3634.5

Classification: novel gene  
Boundaries of gene: 4178749..4179174

## Oligo evidence:

attctcaacgtgatctcggaaagttcgtgctttggccccgatagaaaaaacataaatttaccgtgcat

## Peptide evidence:

ALTANALVGFSTCISESSCFGPDR  
ALTANALVGFSTCISESSCFGPDRK  
APDVWTNNSFVR  
DTSIWGASYNTLYDQAMY  
DTSIWGASYNTLYDQAMYYTTGK  
DTSIWGASYNTLYDQAMYYTTGKR  
EWTGDNVEGMHSGMIINK  
FHSGQVDGK  
FHSGQVDGKPYFCIEAFKPSTTITACSVK  
VYYAPDVWTNN  
VYYAPDVWTNNSFVR  
YAPDVWTNNSFVR  
YYAPDVWTNNSFVR

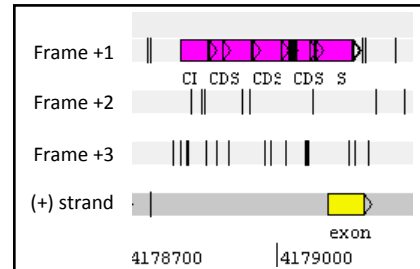

Proposed sequence (peptide evidence in red): 141aa

MRYLLSLSVFLIVSLNPAFAEWTDGDNVEGMHSGMIINKFHSGQVDGKPYFCIEAFKPSTTITACSVKDTSIWGASYNTLYDQAMYYTTGKRIRVYYAPDVWTNNSFVRALTANALVGFSTCISESSCFGPDRKHKHFTVH

Strain: Y. pestis CO92  
Gene: YPO0337

Classification: annotated as hypothetical protein  
Boundaries of gene: complement (344915..345340)

## Oligo evidence:

attctcaacgtgatctcggaaagttcgtgctttggccccgatagaaaaaacataaatttaccgtgcat

## Peptide evidence:

ALTANALVGFSTCISESSCFGPDR  
APDVWTNNSFVR  
DTSIWGASYNTLYDQAMYYTTGK  
DTSIWGASYNTLYDQAMYYTTGKR  
EWTGDNVEGMHSGMIINK  
FHSGQVDGK  
IRVYYAPDVWTNNSFVR  
VYYAPDVWTNN  
VYYAPDVWTNNSFVR  
WTDGDNVEGMHSGMIINK  
YAPDVWTNNSFVR  
YYAPDVWTNNSFVR

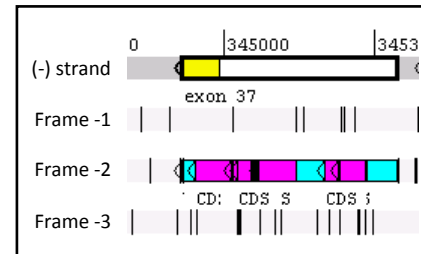

Current sequence (peptide evidence in red): 141aa

MRYLLSLSVFLIVSLNPAFAEWTDGDNVEGMHSGMIINKFHSGQVDGKPYFCIEAFKPSTTITACSVKDTSIWGASYNTLYDQAMYYTTGKRIRVYYAPDVWTNNSFVRALTANALVGFSTCISESSCFGPDRKHKHFTVH

Strain: Y. pseudotuberculosis PB1/+  
Gene: YPTS\_0416

Classification: annotated as hypothetical protein  
Boundaries of gene: complement (460869..461294)

## Oligo evidence:

attctcaacgtgatctcggaaagttcgtgctttggccccgatagaaaaaacataaatttaccgtgcat

## Peptide evidence:

ALTANALVGFSTCISESSCFGPDR  
APDVWTNNSFVR  
DTSIWGASYNTLYDQAMYYTTGK  
DTSIWGASYNTLYDQAMYYTTGKR  
EWTGDNVEGMHSGMIINK  
FHSGQVDGK  
VYYAPDVWTNN  
VYYAPDVWTNNSFVR

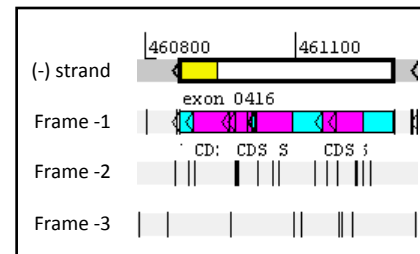

Current sequence (peptide evidence in red): 141aa

MRYLLSLSVFLIVSLNPAFAEWTDGDNVEGMHSGMIINKFHSGQVDGKPYFCIEAFKPSTTITACSVKDTSIWGASYNTLYDQAMYYTTGKRIRVYYAPDVWTNNSFVRALTANALVGFSTCISESSCFGPDRKHKHFTVH

# Error 96

Strain: *Y. pseudotuberculosis* PB1/+  
Gene: YPTS\_0106.5

Classification: novel gene  
Boundaries of gene: 111739..111900

Oligo evidence:

tgataatgctttttatcgagatatacatggaggatggtatgtgagaatattctatacaaatatgct

Peptide evidence:

KIIIDNMLFYR

Proposed sequence (peptide evidence in red): 53aa

VISNHLKTYIPIIRSSKIIIDNMLFYRDIHGGMVCENILIQYVDIAKTILEL

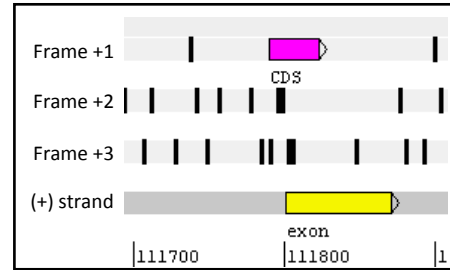

# Error79

Strain: *Y. pestis* pestoides F  
Gene: YPDSF\_3794.5

Classification: novel gene  
Boundaries of gene: complement (4363721..4363882)

Oligo evidence:

tgataatgctttttatcgagatatacatggaggatggtatgtgagaatattctatacaaatatgct

Peptide evidence:

KIIIDNMLFYR

Proposed sequence (peptide evidence in red): 53aa

VISNHLKTYIPIIRSSKIIIDNMLFYRDIHGGMVCENILIQYVDIAKTILEL

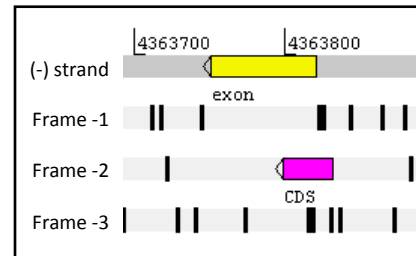

Strain: *Y. pestis* CO92  
Gene: YPO0113

Classification: annotated as hypothetical protein  
Boundaries of gene: 121254..121415

Oligo evidence:

tgataatgctttttatcgagatatacatggaggatggtatgtgagaatattctatacaaatatgct

Peptide evidence:

NA

Current sequence (peptide evidence in red): 53aa

VISNHLKTYIPIIRSSKIIIDNMLFYRDIHGGMVCENILIQYVDIAKTILEL

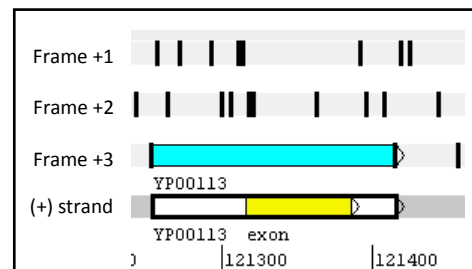

# Error 80

Strain: *Y. pestis* pestoides F  
Gene: YPDFS\_3804.5

Classification: novel gene  
Boundaries of gene: 4374258..4374419

Oligo evidence:

ccgatagcgtcatggcaacgatcaaagccactccagcggtagttgtactacggagaaaacagcagcctct

Peptide evidence:

KPHQDVNELSQ

Proposed sequence (peptide evidence in red): 53aa

VACSDFACSEIAHADTDSVMATIKATPAVVVLRKQQLCIKK**KPHQDVNELSQ**

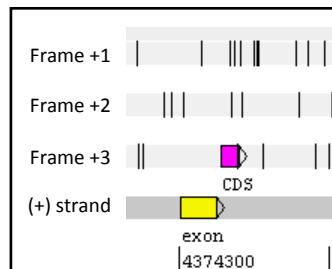

---

# Error lacking threshold of evidence

Strain: *Y. pestis* CO92  
Gene: YPO0101.5

Classification: novel gene  
Boundaries of gene: complement (110692..110853)

Oligo evidence:

ccgatagcgtcatggcaacgatcaaagccactccagcggtagttgtactacggagaaaacagcagcctct

Peptide evidence:

NA

Proposed sequence (peptide evidence in red): 53aa

VACSDFACSEIAHADTDSVMATIKATPAVVVLRKQQLCIKK**KPHQDVNELSQ**

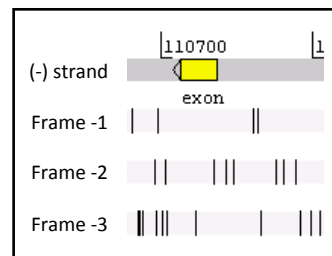

---

# Error lacking threshold of evidence

Strain: *Y. pseudotuberculosis* PB1/+  
Gene: YPTS\_0095.5

Classification: novel gene  
Boundaries of gene: complement (101187..101348)

Oligo evidence:

tataaatttatggatatatgctgttttctacagtgagtttttgggttcgaactgtcacatatctttcc

Peptide evidence:

NA

Proposed sequence (peptide evidence in red): 53aa

VACSDFACSEIAHADTDSVMATIKATPAVVVLRKQQLCIKK**KPHQDVNELSQ**

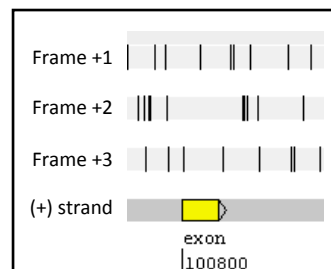

# Error 81

Strain: *Y. pestis* pestoides F  
Gene: YPDSF\_0215.5

Classification: novel gene  
Boundaries of gene: 240335..240820

Oligo evidence:

cgatggtgttataatgaaatgattagaaaaaatgtaatccccccaacataataccgtttggaatgat

Peptide evidence:

DDDSVVFYATDSFDPEVSMK  
KLTSSFEEFINGLVEEDDLE  
LTSSFEEFINGLVEEDDLE  
TLGYSFPEAFVSHYLSFNNGGVPLR  
AWWACDDGCEPLEIAAFKPFK

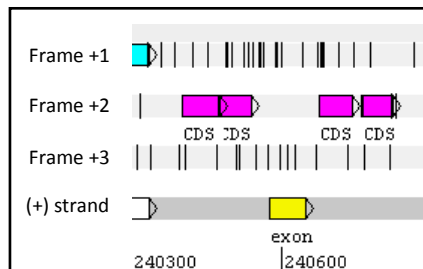

Proposed sequence (peptide evidence in red): 161aa

MKNPCQNCEKNIDLSDIKSVEK**TLGYSFPEAFVSHYLSFNNGGVPLRAWWACDDGCEPLEIAAFKPFKYHKMTNDNPNSLIDGCYNEMIRKNVIPSNIIPFGNDWGGNFFCLNKDDDSVVFYA**  
**TDSFDPEVSMKNHDVLQKLTSSFEEFINGLVEEDDLE**

Strain: *Y. pestis* CO92  
Gene: YP03610

Classification: annotated as hypothetical protein  
Boundaries of gene: 4024505..4024990

Oligo evidence:

cgatggtgttataatgaaatgattagaaaaaatgtaatccccccaacataataccgtttggaatgat

Peptide evidence:

DDDSVVFYATDSFDPEVSMK  
LTSSFEEFINGLVEEDDLE  
TLGYSFPEAFVSHYLSFNNGGVPLR

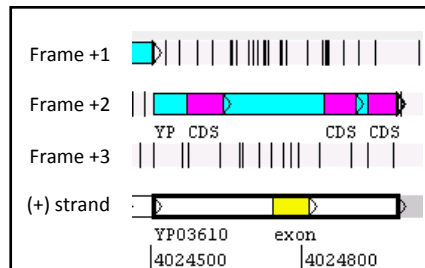

Current sequence (peptide evidence in red): 161aa

MKNPCQNCEKNIDLSDIKSVEK**TLGYSFPEAFVSHYLSFNNGGVPLRAWWACDDGCEPLEIAAFKPFKYHKMTNDNPNSLIDGCYNEMIRKNVIPSNIIPFGNDWGGNFFCLNKDDDSVVFYA**  
**TDSFDPEVSMKNHDVLQKLTSSFEEFINGLVEEDDLE**

Strain: *Y. pseudotuberculosis* PB1/+  
Gene: no ortholog

# Error 82

Strain: *Y. pestis* pestoides F  
Gene: YPDSF\_0388.5

Classification: novel gene  
Boundaries of gene: 441966..442397

Oligo evidence:

ggaatcagaagcgcgacatgaaattcaaaaaattctggctgaatcgccttacgacgatagctttataca

Peptide evidence:

ILAESPYDDSLYT

Proposed sequence (peptide evidence in red): 143aa

VRFADMLLSIAEIQKKVDEMALRAGLPRHSVNLCTEPIGEGTPYITFENMNYIYISERGYEFSRRVTKSLDELWIMSELAKAAAFQYELDRHVEGRDGRRIAFPKFIELMANMNSAWESE  
ARHEIQK**ILAESPYDDSLYT**

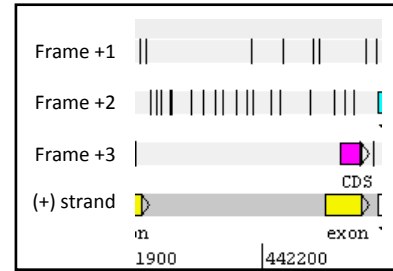

Strain: *Y. pestis* CO92  
Gene: YPO0602

Classification: annotated as hypothetical protein  
Boundaries of gene: 660010..660441

Oligo evidence:

ggaatcagaagcgcgacatgaaattcaaaaaattctggctgaatcgccttacgacgatagctttataca

Peptide evidence:

ILAESPYDDSLYT

Current sequence (peptide evidence in red): 143aa

VRFADMLLSIAEIQKKVDEMALRAGLPRHSVNLCTEPIGEGTPYITFENMNYIYISERGYEFSRRVTKSLDELWIMSELAKAAAFQYELDRHVEGRDGRRIAFPKFIELMANMNSAWESE  
ARHEIQK**ILAESPYDDSLYT**

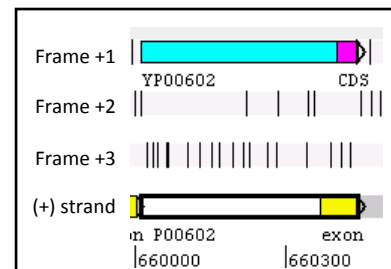

Strain: *Y. pseudotuberculosis* PB1/+  
Gene: no ortholog

# Error 83

Strain: *Y. pestis* pestoides F plasmid CD  
Gene: YPDF\_4024

Classification: frameshift  
Boundaries of gene: Frame+1: 68530..68769  
Frame+3: 68769..69833

## Oligo evidence:

atggattctctgttgcagcagttcaataagcccaaatgttgatcctaaatgggtgtgggattata  
agaaagaaatggctgaacattggaaaatgcacgtaagagacttggctcagctcaacgatgttttggga  
ctaataacacacagatcataaattcagcaactgacaaccgttagataaacttgacaaacagagttga

## Peptide evidence:

LGVGLYPAKPILR  
LPPRGPQGPEK  
EMAETLENARK  
ETLAQSNVDLDAAK  
ETLAQSNVDLDAAKK  
TDRENSVSIHESLNR  
KETLAQSNVDLDAAKK  
SSQALAIKSGYR  
TTLEAEEHANKK

## Proposed sequence (peptide evidence in red):

Frame+1: 79aa

MTKDFKISVSAALISALFSSPYAFAEEPEDGSDGIPRLSAVQISPNVDPK**LGVGLYPAKPILR**QENPK**LPPRGPQGPEK**

Frame+3: 356aa

RARLAEAIQPVVLGAGGLNARAKDPYSIAIGATAEAAKPAIAVSGSMATGVDSVAIGPLSKALGDSAVTYGVSSAQKDGVAIGAKASASDTGVAVGFNSKVDAQNSVAIGHSSHVAAD  
HGYSIAIGDHSK**TDRENSVSIHESLNR**QLTHLAAGTEDTDAVNVAQLKK**EMAETLENARK**ETLAQSNVDLDAAKKHSNSVAR**TTLEAEEHANKK**SAETLVSAKVYADSNSSQTLKTANSYT  
DVTVSNSTKATRESNQYTDHKFSQLDNRLDKLRVDKGLASSAALNSLFQPYGVGKVNFTAGVGGYRSSQALAIKSGYRVNESVAFKAGVAYAGSSNVMYNASFNIEW

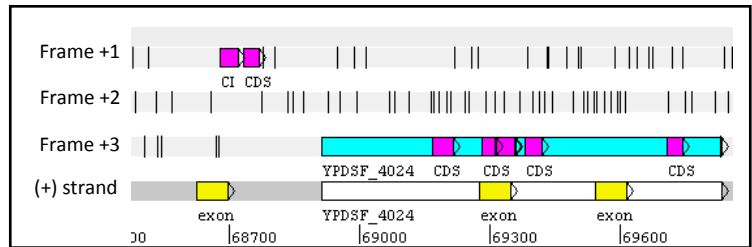

Strain: *Y. pestis* CO92

Gene: YPCD1.87c/ YPCD1.88c

Classification: YPCD1.88c

YPCD1.87c putative yadA yopA invasive pseudogene

Boundaries of gene: complement (60568..61632)

## Oligo evidence:

agaaagaaatggctgaacattggaaaatgcacgtaagagacttggctcagctcaacgatgttttggga  
ctaataacacacagatcataaattcagcaactgacaaccgttagataaacttgacaaacagagttga

## Peptide evidence:

NA

## Current sequence (peptide evidence in red):

YPCD1.88c 79aa

MTKDFKISVSAALISALFSSPYAFAEEPEDGSDGIPRLSAVQISPNVDPK**LGVGLYPAKPILR**QENPK**LPPRGPQGPEK**

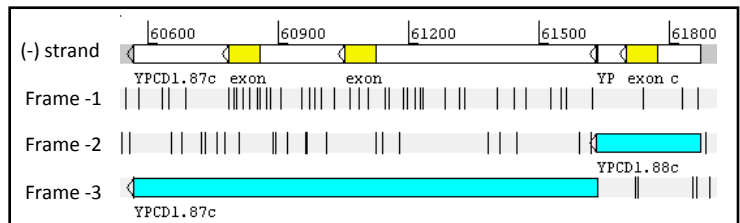

YPCD1.87c 355aa

KRARLAEAIQPVVLGAGGLNARAKDPYSIAIGATAEAAKPAIAVSGSMATGVDSVAIGPLSKALGDSAVTYGVSSAQKDGVAIGAKASASDTGVAVGFNSKVDAQNSVAIGHSSHVAAD  
HGYSIAIGDHSKTDRENSVSIHESLNRQLTHLAAGTEDTDAVNVAQLKK**EMAETLENARK**ETLAQSNVDLDAAKKHSNSVAR**TTLEAEEHANKK**SAETLVSAKVYADSNSSQTLKTANSYT  
DVTVSNSTKATRESNQYTDHKFSQLDNRLDKLRVDKGLASSAALNSLFQPYGVGKVNFTAGVGGYRSSQALAIKSGYRVNESVAFKAGVAYAGSSNVMYNASFNIEW

Strain: *Y. pseudotuberculosis* PB1/+

Gene: YPTS\_4238

Classification: annotated as YadA domain-containing protein

Boundaries of gene: complement(23493..24791)

## Oligo evidence:

atggattctctgttgcagcagttcaataagcccaaatgttgatcctaaatgggtgtgggattata  
agaaagaaatggctgaacattggaaaatgcacgtaagagacttggctcagctcaacgatgttttggga  
tatgcagacagcaattctctcacactaaaaactgcaaatagctataccgatgtgactgtaagtagtt  
ctaataacacacagatcataaattcagcaactgacaaccgttagataaacttgacaaacagagttga

## Peptide evidence:

AISESNQYTDHK  
ALGDSAVTYGASSTAQK  
ALGDSAVTYGASSTAQKDGVAIGAR  
ASASDTGVAVGFNSK  
DNDAVNVAQLKK  
EMAETLENAR  
ENSVSIHESLNR  
ETLAQSNVDLDAAK  
GLASSAALNSLFQPYGVGK  
KAISESNQYTDHK  
KAISESNQYTDHKFSQLDNLR  
LAEAIQPVVLGGLDAR  
LGVGLYPAKPILR  
LSAVQISPNVDPK  
QENPKLPPRGPQGPEK

QLTHLAAGTKDNDAVNVAQLKK  
SSQALAIKSGYR  
TANSYTDVTVSSSTK  
TANSYTDVTVSSSTKK  
TDRENSVSIHESLNR  
TTLEAEEHANKK  
TTLEAEEHANKKSAELVSAK  
VDAQNSVAIGHSSHVAADHGYSIAIGDLSK  
VDKGLASSAALNSLFQPYGVGK  
VNFTAGVGGYR  
VYADSNSSHTLK

## Current sequence (peptide evidence in red): 432aa

MTKDFKISVSAALISALFSSPYAFAEEPEDGNDGIPRL**LSAVQISPNVDPK**LGVGLYPAKPILRQENPK**LPPRGPQGPEK**KRARLAEAIQPVVLGGLDARAKGHSIAIGATAEAAKPAIAVAVGAG  
SIATGVNSVAIGPLSK**ALGDSAVTYGASSTAQKDGVAIGARASASDTGVAVGFNSKVDAQNSVAIGHSSHVAADHGYSIAIGDLSK**TDRENSVSIHESLNRQLTHLAAGTKDNDAVNVAQLK  
**KEMAETLENARK**ETLAQSNVDLDAAKKHSNSVAR**TTLEAEEHANKKSAELVSAK**VYADSNSSHTLKANSYTDVTVSSSTKK**KAISESNQYTDHKFSQLDNRLDKLRVDKGLASSAALNSL**  
**FQPYGVGKVNFTAGVGGYRSSQALAIKSGYR**VNESVAFKAGVAYAGSSNVMYNASFNIEW

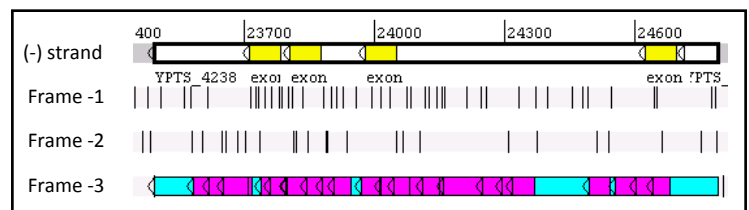

# Error 84

Strain: *Y. pestis* pestoides F plasmid CD  
Gene: YPDFS\_4001.5

Classification: novel gene  
Boundaries of gene: 50030..50578

## Oligo evidence:

tgttttctgtattagattgtgatatagagtatgtttcatagggaaaaaacagtgagggaatataga  
tgatcatctctaaatctgagttggaggaattgagtcgcaatcctgcatcaagaatgtattatgggatg

## Peptide evidence:

DSEGNIEFYDPK  
SGSILSTLEELWQAVGIVYR  
VGIEPLKSGSILSTLEELWQAVGIVYR

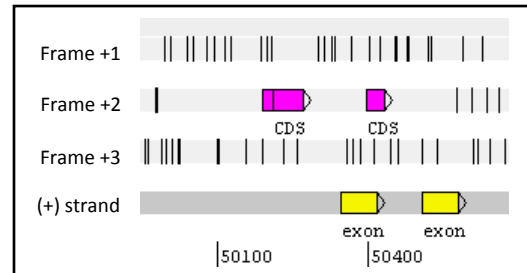

Proposed sequence (peptide evidence in red): 182aa

MFIKDTYNMRALCTALEQSAPDTIINTSKEENNSYYCATAHLLRDTVCSLVNRR**VGIEPLKSGSILSTLEELWQAVGIVYR**LYEWQHVSDIDTNFKKLPNNSDFGLVFSVLDCDIEYVFIGKK**DSEG**  
**NIEFYDPK**NSLLIENDDIKKYLYDEDFHRFCIMLIISKSELEELSRESCDQECIMG

Strain: *Y. pestis* CO92  
Gene: YPCD1.19c

Classification: annotated as putative virulence determinant protein  
Boundaries of gene: complement (11562..12110)

## Oligo evidence:

tgttttctgtattagattgtgatatagagtatgtttcatagggaaaaaacagtgagggaatataga  
tgatcatctctaaatctgagttggaggaattgagtcgcaatcctgcatcaagaatgtattatgggatg

## Peptide evidence:

DSEGNIEFYDPK  
SGSILSTLEELWQAVGIVYR  
VGIEPLKSGSILSTLEELWQAVGIVYR

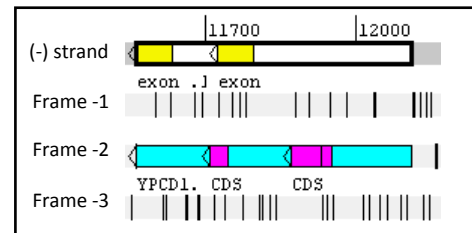

Current sequence (peptide evidence in red): 182aa

MFIKDTYNMRALCTALEQSAPDTIINTSKEENNSYYCATAHLLRDTVCSLVNRR**VGIEPLKSGSILSTLEELWQAVGIVYR**LYEWQHVSDIDTNFKKLPNNSDFGLVFSVLDCDIEYVFIGKK**DSEG**  
**NIEFYDPK**NSLLIENDDIKKYLYDEDFHRFCIMLIISKSELEELSRESCDQECIMG

Strain: *Y. pseudotuberculosis* PB1/+  
Gene: YPTS\_4264

Classification: annotated as yop targeting protein YopK, YopQ  
Boundaries of gene: complement(42819..43367)

## Oligo evidence:

Tgttttctgtattagattgtgatatagagtatgtttcatagggaaaaaacagtgagggaatataga  
tgatcatctctaaatctgagttggaggaattgagtcgcaatcctgcatcaagaatgtattatgggatg

## Peptide evidence:

NA

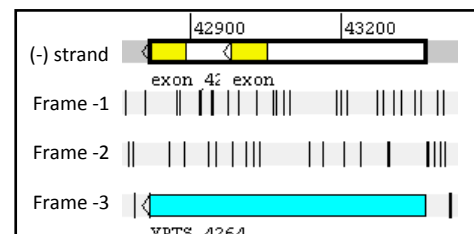

Current sequence (peptide evidence in red): 182aa

MFIKDTYNMRALCTALEQSAPDTIINTSKEENNSYYCATAHLLRDTVCSLVNRRVGIEPLKSGSILSTLEELWQAVGIVYRLYEWQHVSDIDTNFKKLPNNSDFGLVFSVLDCDIEYVFIGKK**DSEG**  
**NIEFYDPK**NSLLIENDDIKKYLYDENFHRFCIMLIISKSELEELSRESCDQECIMG



# Error 85

Strain: *Y. pestis* pestoides F plasmid CD  
Gene: YPDSF\_3943.5

Classification: novel gene  
Boundaries of gene: 4758..5186

Oligo evidence:

tgagaacgtagcaaggagatagcgaactttacgactggtgagcttggtcagttaccagcagaaact

Peptide evidence:

LTLGPIILGFGSGPEAR  
HLSLDELNVENVSK

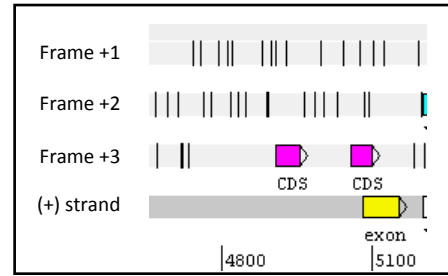

Proposed sequence (peptide evidence in red): 142aa

VINTTFTELLPKIASHFGLDKLSQDEYGLCELIINDRVVIMLRADDEILNRL**LTLGPIILGFGSGPEAR**SAASQLFFCYSINALNKDGPFAWSEELGLIAFK**HLSLDELNVENVSK**EIANFYDWLSLVSLP  
AETAPSYSIYSIG

Strain: *Y. pestis* CO92  
Gene: YPCD1.73c

Classification: annotated as hypothetical protein  
Boundaries of gene: complement(53679..54128)

Oligo evidence:

tgagaacgtagcaaggagatagcgaactttacgactggtgagcttggtcagttaccagcagaaact

Peptide evidence:

EIANFYDWLSLVSLPAETQQELPLHTQSTQSVK  
LTLGPIILGFGSGPE  
LTLGPIILGFGSGPEAR

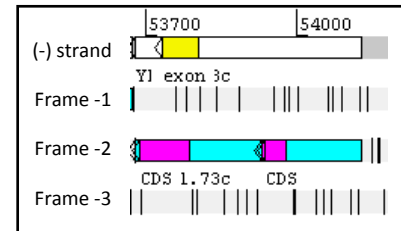

Current sequence (peptide evidence in red): 149aa

VINTTFTELLPKIASHFGLDKLSQDEYGLCELIINDRVVIMLRADDEILNRL**LTLGPIILGFGSGPEAR**SAASQLFFCYSINALNKDGPFAWSEELGLIAFK**HLSLDELNVENVSK**EIANFYDWLSLVSLP  
**AETQQELPLHTQSTQSVK**WG

Strain: *Y. pseudotuberculosis* PB1/+  
Gene: YPTS\_4225

Classification: annotated as hypothetical protein  
Boundaries of gene: complement(16608..17057)

Oligo evidence:

tgagaacgtagcaaggagatagcgaactttacgactggtgagcttggtcagttaccagcagaaact

Peptide evidence:

NA

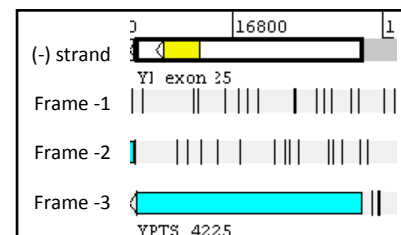

Current sequence (peptide evidence in red): 149aa

VINTTFTELLPKIASHFGLDKLSQDEYGLCELIINDRVVIMLRADDEILNRL**LTLGPIILGFGSGPEAR**SAASQLFFCYSINALNKDGPFAWSEELGLIAFK**HLSLDELNVENVSK**EIANFYDWLSLVSLP  
**AETQQELPLHTQSTQSVK**WG

# Error 86

Strain: *Y. pestis* pestoides F plasmid CD  
Gene: YPDFS\_3969.5

Classification: novel gene  
Boundaries of gene: complement (24847..25242)

Oligo evidence:

agttcgagaggttcagcgactcatttcgaacaggtaacctacctttattctttctataaaactgaat

Peptide evidence:

THFETGNLPLFFSIK

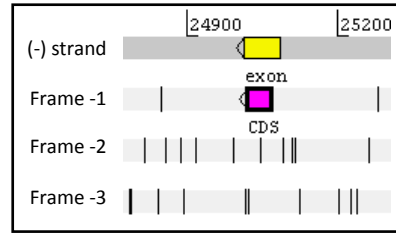

Proposed sequence (peptide evidence in red): 131aa

VSRIIALIISFLLVGCATPPMPAQRIVGEVRMSRPLSRIAHIDVSMFGLYEGKRVQR**THFETGNLPLFFSIK**LNPAQRGEGELYLRSTLSFPERGVQAVAQQKLTGKNKVVLMIPKTCYPNCQLPNTR

Strain: *Y. pestis* CO92  
Gene: YPCD1.48

Classification: annotated as needle complex outer membrane lipoprotein precursor  
Boundaries of gene: 35593..35988

Oligo evidence:

agttcgagaggttcagcgactcatttcgaacaggtaacctacctttattctttctataaaactgaat

Peptide evidence:

GVQAVAQQK  
THFETGNLPLFFSIK

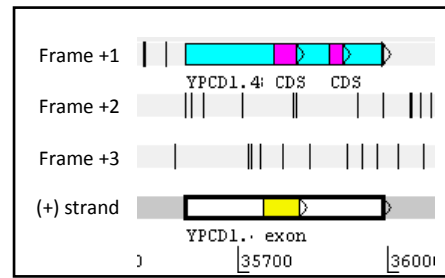

Current sequence (peptide evidence in red): 131aa

VSRIIALIISFLLVGCATPPMPAQRIVGEVRMSRPLSRIAHIDVSMFGLYEGKRVQR**THFETGNLPLFFSIK**LNPAQRGEGELYLRSTLSFPERGVQAVAQQKLTGKNKVVLMIPKTCYPNCQLPNTR

Strain: *Y. pseudotuberculosis* PB1/+  
Gene: YPTS\_4293

Classification: annotated as type III secretion system chaperone YscW  
Boundaries of gene: 68527..68922

Oligo evidence:

agttcgagaggttcagcgactcatttcgaacaggtaacctacctttattctttctataaaactgaat

Peptide evidence:

NA

NA

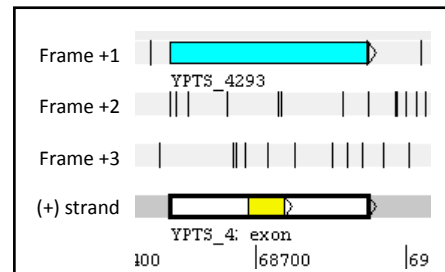

Current sequence (peptide evidence in red): 131aa

VSRIIALIISFLLVGCATPPMPAQRIVGEVRMSRPLSRIAHIDVSMFGLYEGKRVQR**THFETGNLPLFFSIK**LNPAQRGEGELYLRSTLSFPERGVQAVAQQKLTGKNKVVLMIPKTCYPNCQLPNTR

# Error 87

Strain: *Y. pestis* pestoides F plasmid CD  
Gene: YPDFS\_4020.5

Classification: novel gene  
Boundaries of gene: complement (64025..64498)

## Oligo evidence:

atgaagtttcagtataataagcaacaattcctttaactcagtatgtctcggaattaaggcaagtttaaa

## Peptide evidence:

GIPNFSNELETSMGLLR  
KLSNSFK  
MNLQNNLYSILEK  
MNLQNNLYSILEKVESLK

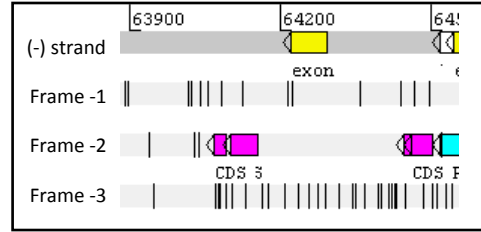

Proposed sequence (peptide evidence in red): 154aa

MNLQNNLYSILEKVESLKNIKMLDKNNGEFTYIEGDYFSDLTDSLNIYEIKYLTFENFDFFSNGKPNEVSVKATNSFNSVCLGKASLNSLDVERKELTVQFTYSMVFDASKGIPNFSNELETS  
MGLLRIPKLSNSFKDKGIEHNYVN

# Error 100

Strain: *Y. pestis* CO92  
Gene: YPCD1.91.5

Classification: novel gene  
Boundaries of gene: 65900..66361

## Oligo evidence:

atgaagtttcagtataataagcaacaattcctttaactcagtatgtctcggaattaaggcaagtttaaa

## Peptide evidence:

ASLNSLDVERK  
GIPNFSNELETSMGLLR  
MNLQNNLYSILEKVESLK

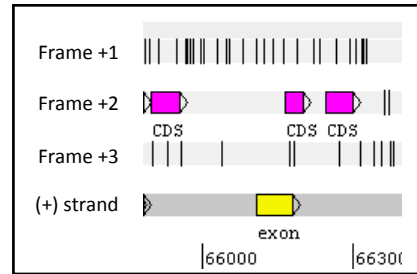

Current sequence (peptide evidence in red): 154aa

MNLQNNLYSILEKVESLKNIKMLDKNNGEFTYIEGDYFSDLTDSLNIYEIKYLTFENFDFFSNGKPNEVSVKATNSFNSVCLGKASLNSLDVERKELTVQFTYSMVFDASKGIPNFSNELETS  
MGLLRIPKLSNSFKDKGIEHNYVN

Strain: *Y. pseudotuberculosis* PB1/+  
Gene: YPTS\_4242

Classification: annotated as hypothetical protein  
Boundaries of gene: 28826..29290

## Oligo evidence:

atgaagtttcagtataataagcaacaattcctttaactcagtatgtctcggaattaaggcaagtttaaa

## Peptide evidence:

ASLNSLDVERK  
GIPNFSNELETSMGLLR  
MNLQNNLYSILEKVESLK

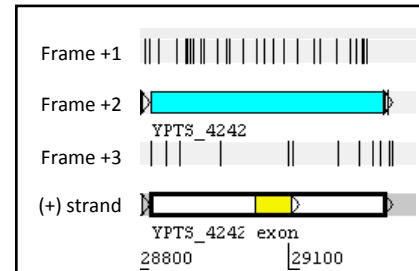

Current sequence (peptide evidence in red): 154aa

MNLQNNLYSILEKVESLKNIKMLDKNNGEFTYIEGNYFSDLTDSLNIYEIKYLTFENFDFFSNGKPNEVSVKATNSFNSVCLGKASLNSLDVERKELTVQFTYSMVFDASKGIPNFSNELETS  
MGLLRIPKLSNSFKDKGIEHNYVN

# Error 88

Strain: *Y. pestis* pestoides F plasmid MT  
Gene: YPDSF\_4088.5

Classification: novel gene  
Boundaries of gene: 60858..61109

Oligo evidence:  
NA

Peptide evidence:

HIQEAI EYALSK  
SVWSTPDVPEHHATQIR

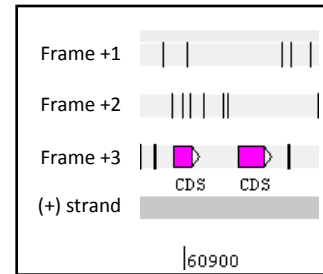

Proposed sequence (peptide evidence in red): 83aa

MKSHPNK**HIQEAI EYALSK**GWVWVPAGKSAHCFCKLRGDKSGEHTSHHRS**SVWSTPDVPEHHATQIR**QAVDQCGRINQMSSK

# Error 48

Strain: *Y. pestis* CO92 plasmid MT  
Gene: YPMT1.53c.5

Classification: novel gene  
Boundaries of gene: 55421..55672

Oligo evidence:  
NA

Peptide evidence:

HIQEAI EYALSK  
SVWSTPDVPEHHATQIR

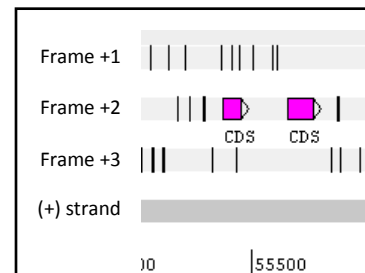

Proposed sequence (peptide evidence in red): 83aa

MKSHPNK**HIQEAI EYALSK**GWVWVPAGKSAHCFCKLRGDKSGEHTSHHRS**SVWSTPDVPEHHATQIR**QAVDQCGRINQMSSK

Strain: *Y. pseudotuberculosis* PB1/+  
Gene: no ortholog

# Error 89

Strain: Y. pestis pestoides F plasmid MT  
Gene: YPDSF\_4138.5

Classification: novel gene  
Boundaries of gene: complement (125215..125541)

## Oligo evidence:

cctgacggctacagagtattgtactcagtgaggagataatgtaataacagcacacgcaatactatcccaca

## Peptide evidence:

EVISGIIHFKEK  
HIESEPK  
HIESEPKEVISGIIHFKEK  
HIESEPKEVISGIIHFKEK

Proposed sequence (peptide evidence in red): 108aa

MAIVIQYTRTRVTKCIDDIASHLR**HIESEPKEVISGIIHFKEK**VSDFPLGCQVCPPELLKIGCAKYRECNTPDGYRVLYSVEDNVITAHAILSHRQDIQNLLFKRLIRI

(-) strand

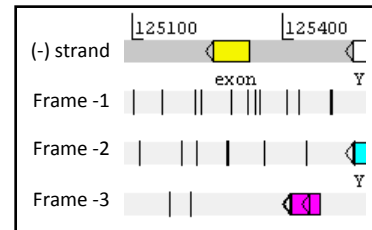

Strain: Y. pestis CO92 plasmid MT  
Gene: YPMT1.69

Classification: annotated as hypothetical protein  
Boundaries of gene: 70690..71016

## Oligo evidence:

cctgacggctacagagtattgtactcagtgaggagataatgtaataacagcacacgcaatactatcccaca

## Peptide evidence:

EVISGIIHFKEK  
HIESEPKEVISGIIHFKEK  
HIESEPKEVISGIIHFKEK  
VLYSVEDNVITAHAILSHR

Current sequence (peptide evidence in red): 108aa

MAIVIQYTRTRVTKCIDDIASHLR**HIESEPKEVISGIIHFKEK**VSDFPLGCQVCPPELLKIGCAKYRECNTPDGYR**VLYSVEDNVITAHAILSHR**QDIQNLLFKRLIRI

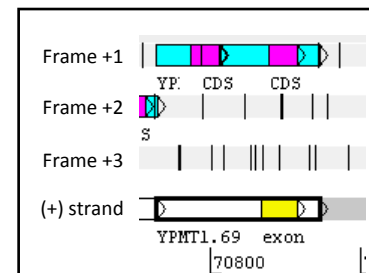

Strain: Y. pseudotuberculosis PB1/+  
Gene: no ortholog

# Error 90

Strain: *Y. pestis* pestoides F  
Gene: YPDSF\_1005

Classification: frameshift  
Boundaries of gene: Frame-2 1141715..1142086  
Frame-3:1141443..1141703

## Oligo evidence:

atgactaactgggatgattttatgggacatgggctgattttgttggggtgatgacagagattgccatt  
ggcttccttgagcatalcgttcctacacgtaaaacatgtactcagattttagtctggcgtactgttcaa  
caggcgtgaaagaattcctttgcttgatttgaactcctcacgggatcgtctactgttctgtgtaa

## Peptide evidence:

EFSLPGFVTPHGYR  
LAFLEHIVPTR  
NIEHTEAFMASGVK  
LVTDAAIPTVYAVK

Proposed sequence (peptide evidence in red):

Current annotation is underlined

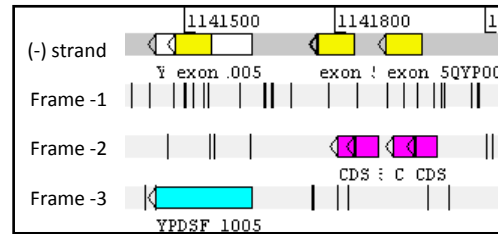

Frame-2: 124aa

MNKYIANEKMPLLIPAAAGFDAKLSMTEK**NIEHTEAFMASGVKEFSLPGFVTPHGYR**LLVSVNGEHYRLVTDAAIPETVYAVK**LAFLEHIVPTR**KTCTQILVWRTVQPQHDSAVHGLPQEFFRH  
F

Frame-3: 87aa

LTQYSIVSDSEQTNEGRRFWERMIAWAIQAEGHYVYVSVNGSEEDRPLTFMTNWDDFYGTWADFCWGDDRDCHCHRLFVISTEQLH

Strain: *Y. pestis* CO92  
Gene: YPO2124

Classification: annotated as hypothetical protein  
Boundaries of gene: 2392729..2393361

## Oligo evidence:

caggcgtgaaagaattcctttgcttgatttgaactcctcacgggatcgtctactgttctgtgtaa  
ggcttccttgagcatalcgttcctacacgtaaaacatgtactcagattttagtctggcgtactgttcaa  
atgactaactgggatgattttatgggacatgggctgattttgttggggtgatgacagagattgccatt

## Peptide evidence:

EFSLPGFVTPHGYR  
LAFLEHIVPTR  
LFVISTEQLH  
LLVSVNGEHYR  
LVTDAAIPTVYAVK  
MPLLIIPAAAGFDAK  
NIEHTEAFMASGVK  
NIEHTEAFMASGVKEFSLPGFVTPHGYR  
PAAGFDAK  
PLLIPAAAGFDAK  
TCTQILVWRTVQPQHDSAVHGLPQEFFR  
TVQPQHDSAVHGLPQEFFR

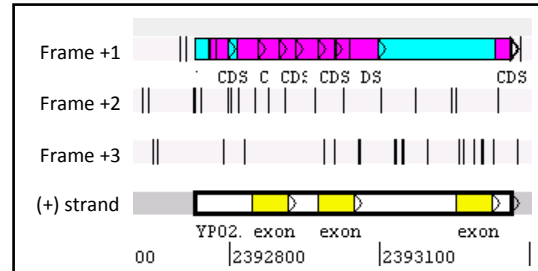

Current sequence (peptide evidence in red): 210aa

MNKYIANEK**MPLLIIPAAAGFDAKLSMTEK****NIEHTEAFMASGVKEFSLPGFVTPHGYR**LLVSVNGEHYRLVTDAAIPETVYAVK**LAFLEHIVPTR**KTCTQILVWRTVQPQHDSAVHGLPQEFFRH  
FLTQYSIVSDSEQTNEGRRFWERMIAWAIQAEGHYVYVSVNGSEEDRPLTFMTNWDDFYGTWADFCWGDDRDCHCHRLFVISTEQLH

Strain: *Y. pseudotuberculosis* PB1/+  
Gene: no ortholog

# Error 91

Strain: *Y. pestis* pestoides F  
Gene: YPDSF\_2750.5

Classification: frameshift  
Boundaries of gene: frame-3: complement (3119589..3119711)  
frame-1: complement (3118639..3119631)

## Oligo evidence:

tgattaataatagtttctggcaaggtaaacgggttttgaacaggccatactgggtttaaagggtgctg  
aatatgccgaaggttgaactttggtcctaacgatgctgatctactcagtaaaaaacattgttgaaca

## Peptide evidence:

MINNSFWQGK  
AIRPWQHVLEPLSGYLLLAQK  
LYTDGAEYAEGWNFPGNDADATPVK  
RLLFAPPTVPSLFETAR  
YWEGEGASWQLDGNAPHEAHYLK  
EFQPEIVFHMAAQPLVR  
ENEAMGGYDPYSNSK  
ENEAMGGYDPYSNSK  
LSYSEPVETYSTNVMGTVYLLEAIR  
NPHAIRPWQHVLEPLSGYLLLAQK  
NSFFNPANYGQHGTA VATVR

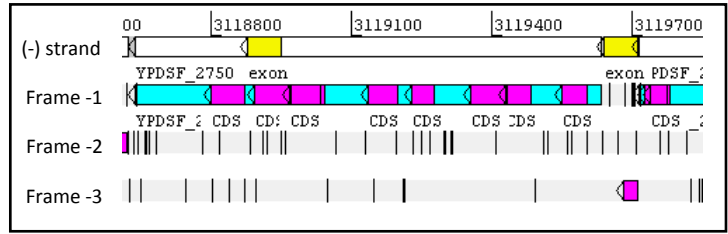

## Proposed sequence (peptide evidence in red):

Frame-3: 41aa

**MINNSFWQGK**RVFVTGHTGFKGGWLSLWLQTMGATVKGYSLPPPRCLAYLRPHELPTGCRKRSVIFVIKNTY

Frame-1: 331aa

MVANHGGNGK**RLLFAPPTVPSLFETAR**VADGMQSEIGDIRDQNKLLSIREFQPEIVFHMAAQPLVRLSYSEPVETYSTNVMGTVYLLEAIRHVGGVKAVVNITSDKCYDNKEWIWGYRENE  
**AMGGYDPYSNSK**GCAELVTSSYRNSFFNPANYGQHGTA VATVRAGNVIGGGDWALDRIVPDILRAFEQSQPVIIIRNPHAIRPWQHVLEPLSGYLLLAQKLYTDGAEYAEGWNFPGNDADA  
**TPVK**NIVEQMVKY**YWEGEGASWQLDGNAPHEAHYLK**DCSKAKMQLGWHPRWNLNTTLEYIVGWKHKNWLSGTMHEYSITEINNYMNTK

Strain: *Y. pestis* CO92  
Gene: YPO3114

Classification: annotated as pseudogene  
Boundaries of gene: frame-2: complement (3471347..3471568)  
frame-3: complement (3470493..3471437)

## Oligo evidence:

tgattaataatagtttctggcaaggtaaacgggttttgaacaggccatactgggtttaaagggtgctg  
aatatgccgaaggttgaactttggtcctaacgatgctgatctactcagtaaaaaacattgttgaaca

## Peptide evidence:

NA

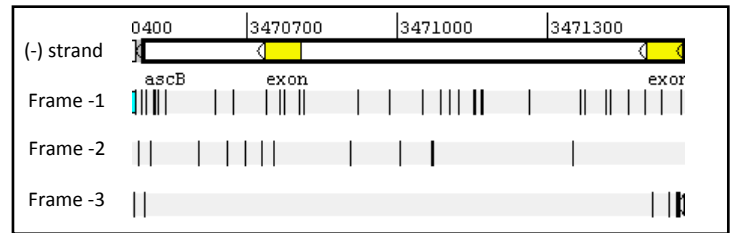

## Current sequence (peptide evidence in red):

Frame-2: 41aa

**MINNSFWQGK**RVFVTGHTGFKGGWLSLWLQTMGATVKGYSLPPPRCLAYLRPHELPTGCRKRSVIFVIKNTY

Frame-3: 316aa

PTVPSLFETARVADGMQSEIGDIRDQNKLLSIREFQPEIVFHMAAQPLVRLSYSEPVETYSTNVMGTVYLLEAIRHVGGVKAVVNITSDKCYDNKEWIWGYRENEAMGGYDPYSNSK  
GCAELVTSSYRNSFFNPANYGQHGTA VATVRAGNVIGGGDWALDRIVPDILRAFEQSQPVIIIRNPHAIRPWQHVLEPLSGYLLLAQKLYTDGAEYAEGWNFPGNDADATPVKNIVEQMVKYWGE  
GASWQLDGNAPHEAHYLKDCSKAKMQLGWHPRWNLNTTLEYIVGWKHKNWLSGTMHEYSITEINNYMNTK

Strain: *Y. pseudotuberculosis* PB1/+  
Gene: YPTS\_1043

Classification: annotated as CDP-glucose 4,6-dehydratase  
Boundaries of gene: 1182733..1183806

## Oligo evidence:

tgattaataatagtttctggcaaggtaaacgggttttgaacaggccatactgggtttaaagggtgctg  
aatatgccgaaggttgaactttggtcctaacgatgctgatctactcagtaaaaaacattgttgaaca

## Peptide evidence:

AFEQSQPVIIIR  
AGNVIGGGDWALDR  
EFQPEIVFHMAAQPLVR  
ENEAMGGYDPYSNSK  
GYSLTPPTVPSLFETAR  
LYTDGAEYAEGWNFPGNDADATPVK  
MQLGWHPR  
NPHAIRPWQHVLEPLSGYLLLAQK  
NSFFNPANYGQHGTA VATVR  
NWLSTDMHEYSITEINNYMNTK  
VKGYSLTPPTVPSLFETAR  
YWEGEGASWQLDGNAPHEAHYLK

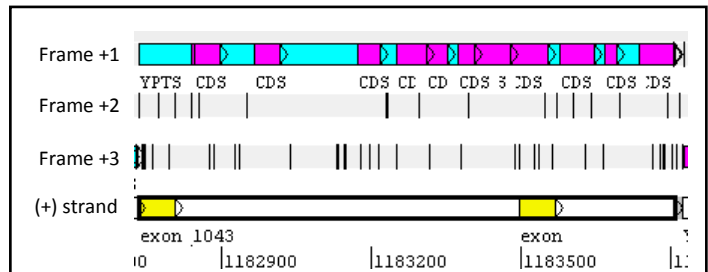

## Current sequence (peptide evidence in red): 357aa

**MINNSFWQGK**RVFVTGHTGFKGGWLSLWLQTMGAK**VKGYSLTPPTVPSLFETAR**VADGMQSEIGDIRDQNKLLSIREFQPEIVFHMAAQPLVRLSYSEPVETYSTNVMGTVYLLEAIRHV  
GGVAVVNITSDKCYDNKEWIWGYRENEAMGGYDPYSNSK  
GCAELVTSSYRNSFFNPANYGQHGTA VATVRAGNVIGGGDWALDRIVPDILRAFEQSQPVIIIRNPHAIRPWQHVLEPLSG  
YLLLAQKLYTDGAEYAEGWNFPGNDADATPVKNIVEQMVKY**YWEGEGASWQLDGNAPHEAHYLK**DCSKAKMQLGWHPRWNLNTTLEYIVGWKHKNWLSGTMHEYSITEINNYMNTK

# Error 92

Strain: *Y. pestis* pestoides F  
Gene: YPDSF\_0824  
Oligo evidence:

Classification: upstream start site  
Boundaries of gene: 930796..934863

tccactcaacttggtgagttgatgctcctgaccaacagcgcttcagcgtcggtcatatagcgcacgaa  
tgttggcaaccaacgctggcagaaaagctcaactcagctcggggtatcaaatatgttatcgatccggc  
caagagttaccggtgctgtaacgcccttctgctatccccggctcggctattcaaaaagcccc

Peptide evidence:

FSQHFNNAPIIEVSGR SVHTAALTGLLSHIGQK  
GVIGHTQPR SVHTAALTGLLSHIGQKDVKE  
ILQTIEQLSV TNLASVILQMTSLGLGDIAAFPVEAPDKR  
INNPDAIQAITHEIEAIAIAMQR VTPLETGLLEALER  
KINNPDAIQAITHEIEAIAIAMQR YRPIVDDADDVDRDQLQAIFDAVDELGR  
LLLLNIPSPIK  
LPIEPIQSASANQR  
SSLTALSTQLGELMLR

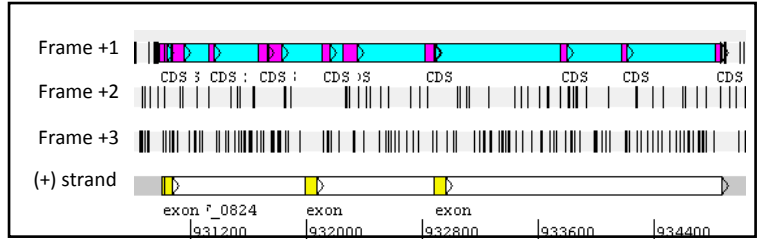

Proposed sequence (peptide evidence in red): 1295aa

Current annotation is underlined

MKSSLTALSTQLGELMLRDQQRIRRLHSARKINNPDAIQAITHEIEAIAIAMQRVTRRAACPAISYPDNLVPSQKQDIYNAIRDHQVIIVAGETGSGKTTQPKICLELGRGVKGVIGHTQPRRLAARTVANRIADELDTSLGGCVGYKFRNDQVQVNTLV  
KLMTDGIILAEIQDRLLMQDYDTLIDEAHERLSNIDFGLYRELLPKRPDLKVIITADIPQRFSQHFNNAPIIEVSGRTPYVEVRYRPIVDDADDVDRDQLQAIFDAVDELGRRESAGDILIFMSGEREIRDADALIKQLPHTVEVPLVYARLSNSEQNRVFSQSH  
GRRIVLATNVAETSLVPGIKYVIDPGTARISRYFRKVRQLPIEPIQSASANQRKGRGCRVSDGICIRLYSEQDFLSRPEFTDPEILRNLASVILQMTSLGLGDIAAFPVEAPDKRNIQDGVRLLEELGAIQTASNGHQQLTLPGRQLAQLVDPRLARMVLOA  
QKSGCVRRELMITSALSIDQPRERPVKQASDEKHRRFADKDSDFLAFVNLWDYLKEQQKLSAQRFRKCRSDYLNLRVREWQDIYTLRQVVKELGIPVNSVAADYRSVHTAALTGLLSHIGQKDVKEQFTGARNARFAIFPGSGLFKPKPKVWVMAEL  
VETSRLWGRARIAARIEPEWIEPLAQHLVHHYSDPHWEKAQAVMASEKVTFLGPIVTERKINYGPIIDPLLCRELFIRHGLVGDWQTRHAFFRMLNKLAEVEELEHKSRRRDLVDEDTLNFYDQIRGRDVISALHFDSSWWKQASQTKPELLNFEKTMLIKE  
GANKVNPDPYPNFVYQGLKRLRYFQEPGTDADGVTYHPIPLNQIHEQGFWDQIPGIRRELIALKSLPKPVRNFVAPNYADAFALARVTPLETGLLEALERLRMTGVTVSRDSWQLDQVDPHLKITFRVLDKKNRILREGKDLAALKLQLEKVKQETL  
SAVADDGIEQNNLHIWISFGDLPCYEQRRGGYEVKAYPALVDEKDSVAIRLFDTESQQQAMWQGTTRRLNINIPSPIKYLHEKLPNKSGLGYFNFTYGNVMDLDDCIACGVDKLVAHQHGGPVVQEAADARLQEKVRAELNDTVVIAKQVEQILTVFSIN  
KRLKGRIDISLVALSDIAKLAGLRYGFTVSNGWKRLPDLTRYLKAIERRELEKLAVDPHDRDAQMLRIEHVQVQVWQWLNKLPKRQDQEEVKEVRWMIELRVSFLAQQLGTPYPVSDKRLIQTIEQLSV

# Error 99

Strain: *Y. pestis* CO92  
Gene: YPO2322  
Oligo evidence:

Classification: upstream start site  
Boundaries of gene: complement (2608715..2612602)

tccactcaacttggtgagttgatgctcctgaccaacagcgcttcagcgtcggtcatatagcgcacgaa  
tgttggcaaccaacgctggcagaaaagctcaactcagctcggggtatcaaatatgttatcgatccggc  
caagagttaccggtgctgtaacgcccttctgctatccccggctcggctattcaaaaagcccc

Peptide evidence:

DILVDDDELTFNFYDQR SSLTALSTQLGELMLR  
ELMITSALSIDQPR SVHTAALTGLLSHIGQK  
FADKDSDFLAFVNLWDYLK SVHTAALTGLLSHIGQKDVKEQFTGAR  
FSQHFNNAPIIEVSGR TNLASVILQMTSLGLGDIAAFPVEAPDKR  
GVIGHTQPR VREWQDIYTLQR  
IEHVQVWQWQLNK VTLFGLPIVTER  
ILQTIEQLSV VTPLETGLLEALER  
INNPDAIQAITHEIEAIAIAMQR YRPIVDDADDVDRDQLQAIFDAVDELGR  
KINNPDAIQAITHEIEAIAIAMQR  
LLLLNIPSPIK  
NFVAPNYADAFALAR

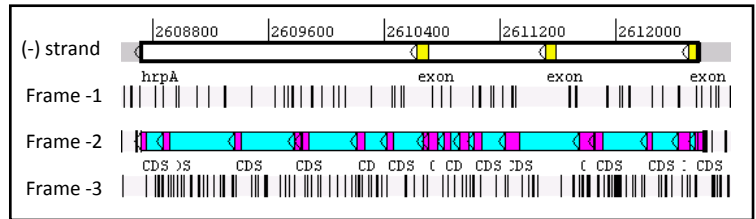

Proposed sequence (peptide evidence in red): 1295aa Current annotation is underlined

VKSSLTALSTQLGELMLRDQQRIRRLHSARKINNPDAIQAITHEIEAIAIAMQRVTRRAACPAISYPDNLVPSQKQDIYNAIRDHQVIIVAGETGSGKTTQPKICLELGRGVKGVIGHTQPRRLAARTVANRIADELDTSLGGCVGYKFRNDQVQVNTLV  
KLMTDGIILAEIQDRLLMQDYDTLIDEAHERLSNIDFGLYRELLPKRPDLKVIITADIPQRFSQHFNNAPIIEVSGRTPYVEVRYRPIVDDADDVDRDQLQAIFDAVDELGRRESAGDILIFMSGEREIRDADALIKQLPHTVEVPLVYARLSNSEQNRVFSQSH  
GRRIVLATNVAETSLVPGIKYVIDPGTARISRYFRKVRQLPIEPIQSASANQRKGRGCRVSDGICIRLYSEQDFLSRPEFTDPEILRNLASVILQMTSLGLGDIAAFPVEAPDKRNIQDGVRLLEELGAIQTASNGHQQLTLPGRQLAQLVDPRLARMVLOA  
QKSGCVRRELMITSALSIDQPRERPVKQASDEKHRRFADKDSDFLAFVNLWDYLKEQQKLSAQRFRKCRSDYLNLRVREWQDIYTLRQVVKELGIPVNSVAADYRSVHTAALTGLLSHIGQKDVKEQFTGARNARFAIFPGSGLFKPKPKVWVMAEL  
VETSRLWGRARIAARIEPEWIEPLAQHLVHHYSDPHWEKAQAVMASEKVTFLGPIVTERKINYGPIIDPLLCRELFIRHGLVGDWQTRHAFFRMLNKLAEVEELEHKSRRRDLVDEDTLNFYDQIRGRDVISALHFDSSWWKQASQTKPELLNFEKTMLIKE  
GANKVNPDPYPNFVYQGLKRLRYFQEPGTDADGVTYHPIPLNQIHEQGFWDQIPGIRRELIALKSLPKPVRNFVAPNYADAFALARVTPLETGLLEALERLRMTGVTVSRDSWQLDQVDPHLKITFRVLDKKNRILREGKDLAALKLQLEKVKQETL  
SAVADDGIEQNNLHIWISFGDLPCYEQRRGGYEVKAYPALVDEKDSVAIRLFDTESQQQAMWQGTTRRLNINIPSPIKYLHEKLPNKSGLGYFNFTYGNVMDLDDCIACGVDKLVAHQHGGPVVQEAADARLQEKVRAELNDTVVIAKQVEQILTVFSIN  
KRLKGRIDISLVALSDIAKLAGLRYGFTVSNGWKRLPDLTRYLKAIERRELEKLAVDPHDRDAQMLRIEHVQVQVWQWLNKLPKRQDQEEVKEVRWMIELRVSFLAQQLGTPYPVSDKRLIQTIEQLSV

Strain: *Y. pseudotuberculosis* PB1/+

Classification: ATP-dependent helicase HrpA  
Boundaries of gene: complement (256482..2568769)

Gene: YPTS\_2317  
Oligo evidence:

tccactcaacttggtgagttgatgctcctgaccaacagcgcttcagcgtcggtcatatagcgcacgaa  
tgttggcaaccaacgctggcagaaaagctcaactcagctcggggtatcaaatatgttatcgatccggc  
caagagttaccggtgctgtaacgcccttctgctatccccggctcggctattcaaaaagcccc

Peptide evidence:

EGKDLAALKLQLEK SSLTALSTQLGELMLR  
FSQHFNNAPIIEVSGR SVHTAALTGLLSHIGQK  
INNPDAIQAITHEIEAIAIAMQR TNLASVILQMTSLGLGDIAAFPVEAPDKR  
KINNPDAIQAITHEIEAIAIAMQR VTPLETGLLEALER  
QNLPHTEVPLYAR  
RMTGVTVSR

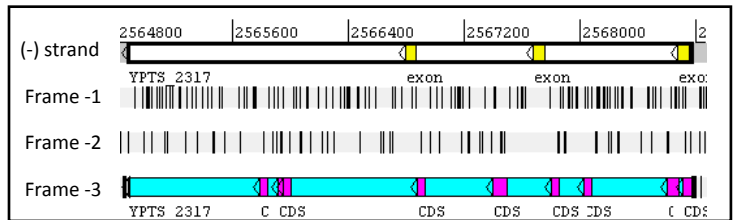

Current sequence (peptide evidence in red): 1295aa

VKSSLTALSTQLGELMLRDQQRIRRLHSARKINNPDAIQAITHEIEAIAIAMQRVTRRAACPAISYPDNLVPSQKQDIYNAIRDHQVIIVAGETGSGKTTQPKICLELGRGVKGVIGHTQPRRLAARTVANRIADELDTSLGGCVGYKFRNDQVQVNTLV  
KLMTDGIILAEIQDRLLMQDYDTLIDEAHERLSNIDFGLYRELLPKRPDLKVIITADIPQRFSQHFNNAPIIEVSGRTPYVEVRYRPIVDDADDVDRDQLQAIFDAVDELGRRESAGDILIFMSGEREIRDADALIKQLPHTVEVPLVYARLSNSEQNRVFSQSH  
GRRIVLATNVAETSLVPGIKYVIDPGTARISRYFRKVRQLPIEPIQSASANQRKGRGCRVSDGICIRLYSEQDFLSRPEFTDPEILRNLASVILQMTSLGLGDIAAFPVEAPDKRNIQDGVRLLEELGAIQTASNGHQQLTLPGRQLAQLVDPRLARMVLOA  
QKSGCVRRELMITSALSIDQPRERPVKQASDEKHRRFADKDSDFLAFVNLWDYLKEQQKLSAQRFRKCRSDYLNLRVREWQDIYTLRQVVKELGIPVNSVAADYRSVHTAALTGLLSHIGQKDVKEQFTGARNARFAIFPGSGLFKPKPKVWVMAEL  
VETSRLWGRARIAARIEPEWIEPLAQHLVHHYSDPHWEKAQAVMASEKVTFLGPIVTERKINYGPIIDPLLCRELFIRHGLVGDWQTRHAFFRMLNKLAEVEELEHKSRRRDLVDEDTLNFYDQIRGRDVISALHFDSSWWKQASQTKPELLNFEKTMLIKE  
GANKVNPDPYPNFVYQGLKRLRYFQEPGTDADGVTYHPIPLNQIHEQGFWDQIPGIRRELIALKSLPKPVRNFVAPNYADAFALARVTPLETGLLEALERLRMTGVTVSRDSWQLDQVDPHLKITFRVLDKKNRILREGKDLAALKLQLEKVKQETL  
SAVADDGIEQNNLHIWISFGDLPCYEQRRGGYEVKAYPALVDEKDSVAIRLFDTESQQQAMWQGTTRRLNINIPSPIKYLHEKLPNKSGLGYFNFTYGNVMDLDDCIACGVDKLVAHQHGGPVVQEAADARLQEKVRAELNDTVVIAKQVEQILTVFSIN  
KRLKGRIDISLVALSDIAKLAGLRYGFTVSNGWKRLPDLTRYLKAIERRELEKLAVDPHDRDAQMLRIEHVQVQVWQWLNKLPKRQDQEEVKEVRWMIELRVSFLAQQLGTPYPVSDKRLIQTIEQLSV



# Error 93

Strain: *Y. pestis* pestoides F plasmid CD  
Gene: YPDSF\_3996

Classification: upstream start site YopM  
Boundaries of gene: 44576..45805

## Oligo evidence:

aaatccaagaatgtatctaactctttttgcaagaaccattacgtcattctctaatttaactgagatg  
cagcaatgaataagatccttatgcgatttaccctctcactggaagaacttaatgtagtaataaag

## Peptide evidence:

ALSDLPLLEYLEGVSNNQLEK  
ALSDLPLLEYLEGVSNNQLEKLPQLQNSSFLK  
IIDVDNNSLK  
KLPDLPLSLESIVAGNNILEELPELQNLPLFTTIYADNNSLK  
KLPDLPPSLEFIAAGNNQLEELPELQNLPLFTAIYADNNSLK  
LPELQNSSFLK  
TLPDLPPSLEALNVR  
PELQNLPLFTAIYADNNSLK  
LIASFNHLAEVPELPQNLK  
NVSNTFLQEPLR

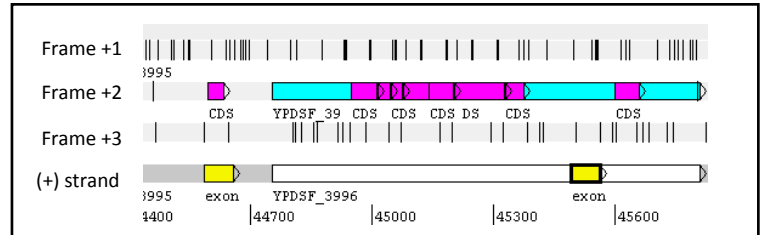

Proposed sequence (peptide evidence in red): 409aa  
Current annotation is underlined

MFINPRNNVSNTFLQEPLRHSSNLTMPVEAENVKSKTEYYNAWSEWERNAPPNGEQREMAVSRRLDCLDRQAHELELNNLGLSSLPPELPPHLESVASCNSLTPELPELQSLKSLVDNNSLKALSDDLPLLEYLEGVSNNQLEKLPQLQNSSFLKIIDVDNNSLKLPDLPPSLEFIAAGNNQLEELPELQNLPLFTAIYADNNSLKLPDLPLSLESIVAGNNILEELPELQNLPLFTTIYADNNSLKTLPLPPSLEALNVRDNYLTDLPPELQSLTFLDVSSEIFSGSELPPNLYLNASSEIRSLCDLPPSLEELNVSNNKLIELPALPPRLERLIASFNHLAEVPELPQNLKQLHVEYNPLREFPDIPESVEDLRMNSERVVDPYEFAHETTDKLEDDVFE

Strain: *Y. pestis* CO92 plasmid CD  
Gene: YPCD1.26c

Classification: annotated as YopM  
Boundaries of gene: complement (16336..17565)

## Oligo evidence:

aaatccaagaatgtatctaactctttttgcaagaaccattacgtcattctctaatttaactgagatg  
cagcaatgaataagatccttatgcgatttaccctctcactggaagaacttaatgtagtaataaag

## Peptide evidence:

ALSDLPLLEYLEGVSNNQLEK  
KLPDLPLSLESIVAGNNILEELPELQNLPLFTTIYADNNSLK  
KLPDLPPSLEFIAAGNNQLEELPELQNLPLFTAIYADNNSLK  
LIASFNHLAEVPELPQNLK  
LPELQNSSFLK

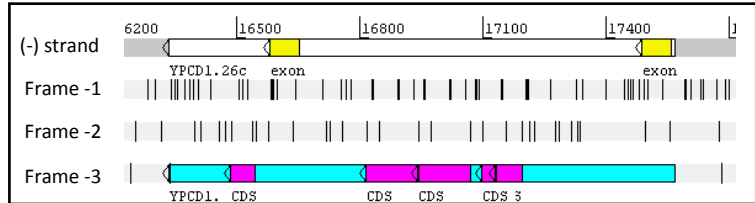

Current sequence (peptide evidence in red): 409aa

MFINPRNNVSNTFLQEPLRHSSNLTMPVEAENVKSKTEYYNAWSEWERNAPPNGEQREMAVSRRLDCLDRQAHELELNNLGLSSLPPELPPHLESVASCNSLTPELPELQSLKSLVDNNSLKALSDDLPLLEYLEGVSNNQLEKLPQLQNSSFLKIIDVDNNSLKLPDLPPSLEFIAAGNNQLEELPELQNLPLFTAIYADNNSLKLPDLPLSLESIVAGNNILEELPELQNLPLFTTIYADNNSLKTLPLPPSLEALNVRDNYLTDLPPELQSLTFLDVSSEIFSGSELPPNLYLNASSEIRSLCDLPPSLEELNVSNNKLIELPALPPRLERLIASFNHLAEVPELPQNLKQLHVEYNPLREFPDIPESVEDLRMNSERVVDPYEFAHETTDKLEDDVFE

Strain: *Y. pseudotuberculosis* PB1/+ plasmid  
Gene: YPTS\_4270

Classification: annotated as YopM  
Boundaries of gene: complement(47586.. 49175)

## Oligo evidence:

aaatccaagaatgtatctaactctttttgcaagaaccattacgtcattctctaatttaactgagatg  
ataataacaatcgaaggcattatcgatttaccctctcactggaatatcttagtagtaataaag

## Peptide evidence:

NA

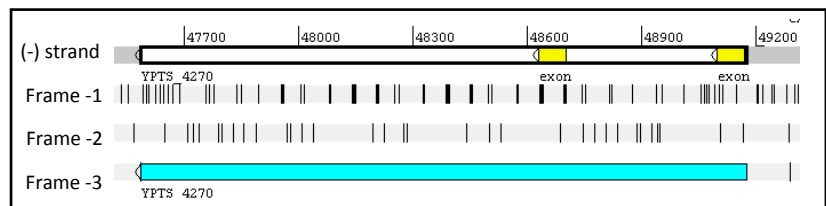

Current sequence (peptide evidence in red): 529aa

MFINPRNNVSNTFLQEPLRHSSNLTMPVEAENVKSKTEYYNAWSEWERNAPPNGEQREMAVSRRLDCLDRQAHELELNNLGLSSLPPELPPHLESVASCNSLTPELPELQSLKSLQVNNLKLALPDLPPSLKLVHRENDLTDLPPELQSLSLRVDNNSLKALSDDLPPSLEYLTASSNKLEELPELQNLPLFLAAIYADNNSLLETLPDLPPSLKLVHRENDLTDLPPELQSLSLQVNNLKLALSDDLPPSLEYLTASSNKLEELPELQNLPLFLAAIYADNNSLLETLPDLPPHLEILVASYNSLTPELPELQSLKSLRVDNNSLKALSDDLPPSLEYLTASSNKLEELPELQNLPLFLAAIYADNNSLLETLPDLPPSLKLVHRENDLTDLPPELQSLTFLDVSSEIFSGSELPPNLYLDASSNEIRSLCDLPPSLVDLNVKSNQSELPALPPLHLERLIASFNHLAEVPELPQNLKQLHVEYNALREFPDIPESLEELEMDSERVVDYEFAHETTDKLEDDVFE

# Error 94

Strain: *Y. pseudotuberculosis* PB1/+  
Gene: YPTS\_1064  
Oligo evidence:

Classification: pseudogene  
Boundaries of gene: frame+3:1206042..1207007  
frame +2 1207007..1207696

gggcgagtgcctgggaaaaagataaaaactacgacatcacatattgcacaccaatgatcatcatggtca  
tccgtaatggcgaattaacattggtcaactaccagttatccccgatcaattaaagaaaaaattgagaaa  
ttaaactggtcaactaccagttatccccgatcaattaaagaaaaaattgagaaaagctgatggcactcg  
taatatggcgcgtttattatagcctcctcaatagaacgttcaggagctgactttgccgtaatgagtggt  
tgcaggtgatatacattataaagatgtctcaaggttcaacccttggtaatacgtggtttacgttgat

Peptide evidence:

HSPDLAEQYQPK

Proposed sequence (peptide evidence in red): 551aa

Frame+3:

MRFSLTTLGALAVSLALAPGWASAWEKDKTYDITILHTNDHHGHFWQNEQGEYGLAAQKTVVDEIRKQVAAKGGSLLLSGGDINTGVPESDLQDAEPDFRGMNLVGYDAMAIGNHEFDNPLSVLRQKEKWAQKFP  
LLSANIYQKGTQRLFKPYALFDKQGIKIAVLGLTDDTPKVSSPENVVDIEFRVPAVEAKHVVEQLRKTEKPDIIIAATHMGHYDDGKHGNSAPGDVEMARSLPAGYLDMIVGGHSQNPVCMASENHRQVDYVPGSPC  
VPDRQNGTWIVQAEHWGKYVGRADFFRNGELTLVNYQLIPINLKKK

Frame+2:

IEKADGTREHVYFTQIEAQDPTMLKLLTPFEERGAQLGVRIGSVNGRLEGDRNKVRFEQTNMARLLASQIERSGADFAVMSGGVDRDSIGAGDITYKDLVKVQPFNGTLVYVDMKGSEVEKYLAVVANKQPDGSGAY  
AQFANVSLVADGGQVSNVKIQGEPLDPNKTYRMATLNFNALGGDGYPRIDNSPSYVNTGFIDAELVKYIEK**HSPDLAEQYQPK**GEIVYNQ

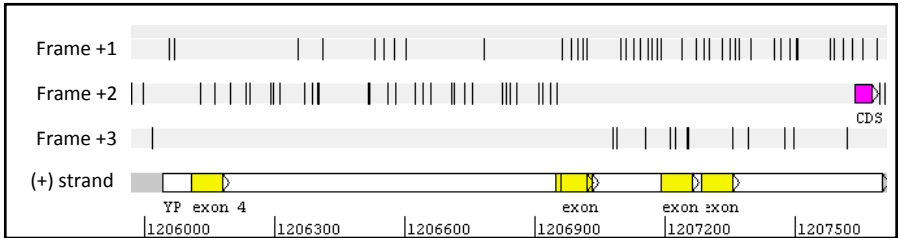

Strain: *Y. pestis* pestoides F  
Gene: YPDSF\_2730/ YPDSF\_2729/ YPDSF\_2728

Classification: annotated as 5'-nucleotidase/2' 3'-cyclic phosphodiesterase  
Boundaries of gene: YPDSF\_2730 complement(3096680..3096937)  
YPDSF\_2729 complement(3095899..3096867)  
YPDSF\_2728 complement(3095282..3095905)

Oligo evidence:

gggcgagtgcctgggaaaaagataaaaactacgacatcacatattgcacaccaatgatcatcatggtca  
tccgtaatggcgaattaacattggtcaactaccagttatccccgatcaattaaagaaaaaattgagaaa  
ttaaactggtcaactaccagttatccccgatcaattaaagaaaaaattgagaaaagctgatggcactcg  
tgcaggtgatatacattataaagatgtctcaaggttcaacccttggtaatacgtggtttacgttgat

Peptide evidence:

NA

Current sequence (peptide evidence in red):

YPDSF\_2730 85aa

MRFSLTTLGALAVSLALAPGWASAWEKDKTYDITILHTNDHHGHFWQNEQGEYGLAAQKTVVDEIRKQVAAKGGSLLLSGGDY

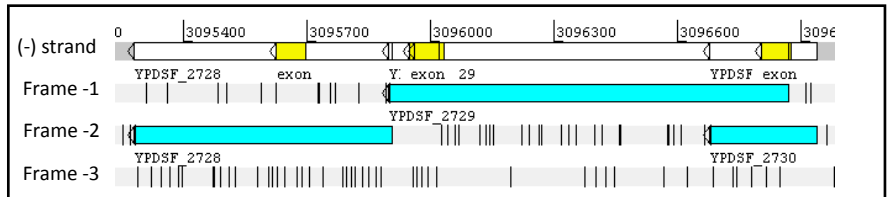

YPDSF\_2729 322 aa

MPGKIKLLTSPYCTPMIIMVTSKTSKVSMLLHRKPWWMKFVNKWPQKEEAYCYSRAVIINTGVPESDLQDAEPDFRGMNLVGYDAMAIGNHEFDNPLSVLRQKEKWAQKFP  
LLSANIYQKGTQRLFKPYALFDKQGIKIAVLGLTDDTPKVSSPENVVDIEFRVPAVEAKHVVEQLRKTEKPDIIIAATHMGHYDDGKHGNSAPGDVEMARSLPAGYLDMIVGGHSQNPVCMASENHRQVDYVPGSPCVPDRQNGTWIVQAEHWGKYVGRADFFRNGELTLVNYQLIPINLKKLRLMALASTSFIPKRLRTPQC

YPDSF\_2728 207 aa

MLKLLTPFEERGAQLGVRIGSVNGRLEGDRNKVRFEQTNMARLLASQIERSGADFAVMSGGVDRDSIGAGDITYKDLVKVQPFNGTLVYVDMKGSEVEKYLAVVANKQPDGSGAYAQFANVSLVADGGQVSNVKIQ  
GEPLDPNKTYRMATLNFNALGGDGYPRIDNSPSYVNTGFIDAELVKYIEKHSPDLAEQYQLKGEIVYNQ

Strain: *Y. pestis* CO92  
Gene: YPO3090

Classification: annotated as pseudogene  
Boundaries of gene: frame-2: complement (3448532..3448783)  
frame-1: complement (3447817..3448530)  
frame-2: complement (3447128..3447817)

Oligo evidence:

gggcgagtgcctgggaaaaagataaaaactacgacatcacatattgcacaccaatgatcatcatggtca  
tccgtaatggcgaattaacattggtcaactaccagttatccccgatcaattaaagaaaaaattgagaaa  
ttaaactggtcaactaccagttatccccgatcaattaaagaaaaaattgagaaaagctgatggcactcg  
tgcaggtgatatacattataaagatgtctcaaggttcaacccttggtaatacgtggtttacgttgat

Peptide evidence:

NA

Current sequence (peptide evidence in red):

Frame-2: 84aa

MRFSLTTLGALAVSLALAPGWASAWEKDKTYDITILHTNDHHGHFWQNEQGEYGLAAQKTVVDEIRKQVAAKGGSLLLSGGD

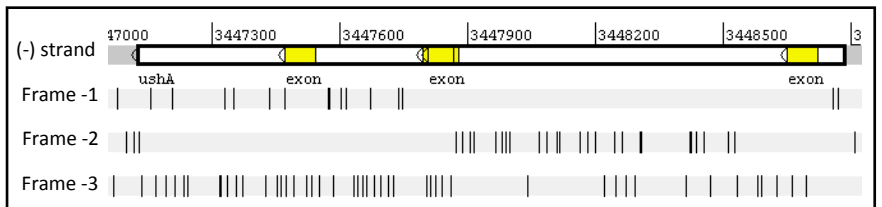

Frame-1: 238aa

INTGVPESDLQDAEPDFRGMNLVGYDAMAIGNHEFDNPLSVLRQKEKWAQKFP  
LLSANIYQKGTQRLFKPYALFDKQGIKIAVLGLTDDTPKVSSPENVVDIEFRVPAVEAKHVVEQLRKTEKPDIIIAATHMGHYDDGKHGNSAPGDVEMARSLPAGYLDMIVGGHSQNPVCMASENHRQVDYVPGSPCVPDRQNGTWIVQAEHWGKYVGRADFFRNGELTLVNYQLIPINLKKK

Frame-2: 229aa

IEKADGTREHVYFTQIEAQDPTMLKLLTPFEERGAQLGVRIGSVNGRLEGDRNKVRFEQTNMARLLASQIERSGADFAVMSGGVDRDSIGAGDITYKDLVKVQPFNGTLVYVDMKGSEVEKYLAVVANKQPDGSGAY  
AQFANVSLVADGGQVSNVKIQGEPLDPNKTYRMATLNFNALGGDGYPRIDNSPSYVNTGFIDAELVKYIEKHSPDLAEQYQLKGEIVYNQ

# Error 95

Strain: *Y. pseudotuberculosis* PB1/+  
Gene: YPTS\_2214.5

Classification: novel gene  
Boundaries of gene: 2440905..2441096

Oligo evidence:

tagtcggctgctgttcaacaaagcagcgcgatagataaagaggggaatacattgtatgcctatattttgta

Peptide evidence:

LNKKISVITIGYIAISFSR

Proposed sequence (peptide evidence in red): 63aa

LLRYIGLNKKISVITIGYIAISFSRLLFNKAAIDKEGNTLYAYILLTRKIYVSYQLTSITYII

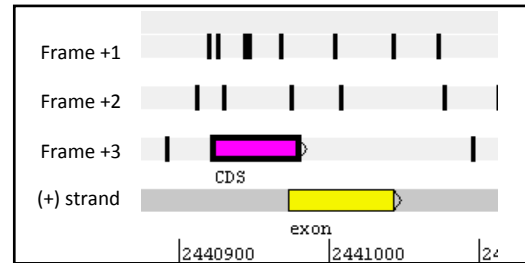

---

## Error lacking threshold of evidence

Strain: *Y. pestis* pestoides F  
Gene: YPDFS\_0911.5

Classification: novel gene  
Boundaries of gene: complement (1035790..1035981)

Oligo evidence:

tagtcggctgctgttcaacaaagcagcgcgatagataaagaggggaatacattgtatgcctatattttgta

Peptide evidence:

NA

Current sequence (peptide evidence in red): 63aa

LLRYIGLNKKISVITISYIAISFSRLLFNKAAIDKEGNTLYAYILLTRKIYVSYQLTSITYII

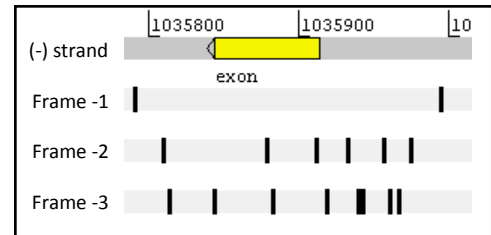

---

## Error lacking threshold of evidence

Strain: *Y. pestis* CO92  
Gene: YPO222.5

Classification: novel gene  
Boundaries of gene: 2500177..2500368

Oligo evidence:

tagtcggctgctgttcaacaaagcagcgcgatagataaagaggggaatacattgtatgcctatattttgta

Peptide evidence:

NA

Current sequence (peptide evidence in red): 63aa

LLRYIGLNKKISVITISYIAISFSRLLFNKAAIDKEGNTLYAYILLTRKIYVSYQLTSITYII

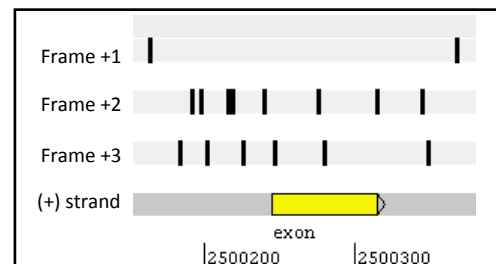

## Error 96

Strain: *Y. pseudotuberculosis* PB1/+  
Gene: YPTS\_0106.5

Classification: novel gene  
Boundaries of gene: 111739..111900

Oligo evidence:

tgataaatgctttttatcgagatatacatggaggatggtatgtgagaatattctatacaaatatgct

Peptide evidence:

KIIIDNMLFYR

Proposed sequence (peptide evidence in red): 53aa

VISNHLKTYIPIIRSSKIIIDNMLFYRDIHGGMVCENILIQYVDIAKTILEL

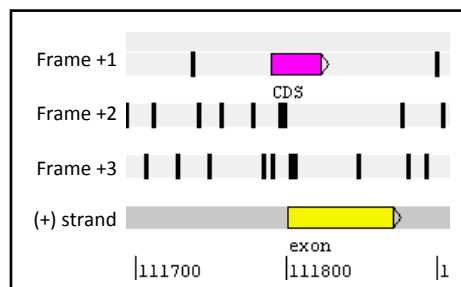

## Error 79

Strain: *Y. pestis* pestoides F  
Gene: YPDSF\_3794.5

Classification: novel gene  
Boundaries of gene: complement (4363721..4363882)

Oligo evidence:

tgataaatgctttttatcgagatatacatggaggatggtatgtgagaatattctatacaaatatgct

Peptide evidence:

KIIIDNMLFYR

Proposed sequence (peptide evidence in red): 53aa

VISNHLKTYIPIIRSSKIIIDNMLFYRDIHGGMVCENILIQYVDIAKTILEL

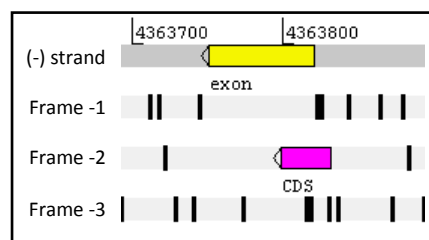

Strain: *Y. pestis* CO92  
Gene: YP00113

Classification: annotated as hypothetical protein  
Boundaries of gene: 121254..121415

Oligo evidence:

tgataaatgctttttatcgagatatacatggaggatggtatgtgagaatattctatacaaatatgct

Peptide evidence:

NA

Current sequence (peptide evidence in red): 53aa

VISNHLKTYIPIIRSSKIIIDNMLFYRDIHGGMVCENILIQYVDIAKTILEL

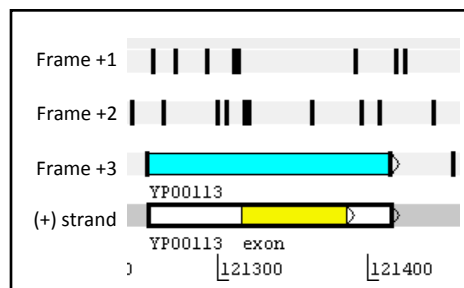

Supplement: pone.0033903.s002.pdf [file pone.0033903.s002.pdf]
