# Supplementary material for: Comparative Omics-Driven Genome Annotation Refinement: Application across Yersiniae
Source: PLoS One. 2012 Mar 27;7(3):e33903. doi: 10.1371/journal.pone.0033903 (PMC3313959; doi:10.1371/journal.pone.0033903)
Supplement: File S1 — Lists of orthologous peptides. All two-way comparisons from the three strains examined are provided. Singlet peptide observations from one strain are compared against all peptide observations from another strain. Detailed information including coverage and alignments is given. (XLSX) [file pone.0033903.s001.xlsx]

## Sheet: all peptide observations
ypco peptides	yppf peptides	ypts peptides
AAAADRTGHALLHTLYQQNLK	AAADRDAAYEK	AAAEAAASTDVDDLFGGLANAK
AAADDGLFPPIFGK	AAADRLNISNNTK	AAAEQSWSLSPLTLPHPLVR
AAADRDAAYEK	AAAEQISGVNAAM*AYGTDGPVAALGLQTLEDTK	AAAESSIQVK
AAADRDAAYEKINEVR	AAAEQSWSLSPLTLPHPLVR	AAAFEGELIPAAQIDR
AAADRLNISNNTK	AAAESSIQVK	AAAGGMLLQVLPAQER
AAAEQSWSLSPLTLPHPLVR	AAAFEGELIPAAQIDR	AAAIEQNHDDR
AAAESSIQVK	AAAGGMLLQVLPAQER	AAAKADAQEQQPAVDTK
AAAFEGELIPAAQIDR	AAAGGMLLQVLPAQERNEDEFDHLAQLTATIK	AAALAAADAR
AAAGGMLLQVLPAQER	AAAIEQNHDDR	AAALAAEIHGVKK
AAAGGMLLQVLPAQERNEDEFDHLAQLTATIK	AAAKADAQEQQPAVDTK	AAALAYGLDKEVGNR
AAAGNALPDLIFNDAVAIGQFVQLGIVEPIEPK	AAALAAADAR	AAAM*GGNVIYGATSPSETFLSS
AAALAAADAR	AAALAAEIHGVKK	AAAMALGYLTDAEFDEWVRPEDMVGSMK
AAALAAEIHGVKK	AAALAYGLDKEVGNR	AAAMANKELHTIPR
AAALAYGLDKEVGNR	AAAM*ANKELHTIPR	AAAMGGNVIYGATSPSETFLSS
AAALSATALASILLIIK	AAAM*GGNVIYGATSPSET	AAAMGGNVIYGATSPSETFLSSFAPLESK
AAAM*ANKELHTIPR	AAAM*GGNVIYGATSPSETFLSS	AAAMPISDTLSAQQLAQLK
AAAM*GGNVIYGATSPS	AAAM*GGNVIYGATSPSETFLSSFAPLESK	AAAPIVAPTPAPAPIVDTK
AAAM*GGNVIYGATSPSET	AAAM*PISDTLSAQQLAQLK	AAAQTM*RPNPAFSAEQVITELGVGEALISFLDEK
AAAM*GGNVIYGATSPSETFLSS	AAAMALGYLTDAEFDEWVRPEDMVGSMK	AAAQTMRPNPAFSAEQVITELGVGEALISFLDEK
AAAM*GGNVIYGATSPSETFLSSFAPLESK	AAAMANKELHTIPR	AAASLAHHYPGGYNAFIK
AAAMALGYLTDAEFDEWVRPEDMVGSMK	AAAMGGNVIYGATSPSET	AAATGVMPLDMPESVLVR
AAAMANKELHTIPR	AAAMGGNVIYGATSPSETFLSS	AAAVEQLQVWGER
AAAMGGNVIYGATSPSET	AAAMGGNVIYGATSPSETFLSSFAPLESK	AADEGLEVAGSAM*ASDAFFPFR
AAAMGGNVIYGATSPSETFLSS	AAAMPISDTLSAQQLAQLK	AADEGLEVAGSAMASDAFFPFR
AAAMGGNVIYGATSPSETFLSSFAPLESK	AAAPIVAPTPAPAPIVDTK	AADESELDNLLDADAYLAAIEE
AAAMPISDTLSAQQLAQLK	AAAQTM*RPNPAFSAEQVITELGVGEALISFLDEK	AADFIAHQTSAK
AAANVPAFVSGK	AAAQTMRPNPAFSAEQVITELGVGEALISFLDEK	AADFIAHQTSAKR
AAAPSGASTGSR	AAAQVNMDLGLLPAER	AADGSGYQFLVEILSDLNTR
AAAQTM*RPNPAFSAEQVITELGVGEALISFLDEK	AAASLAHHYPGGYNAFIK	AADLGQPFQFNNFRD
AAAQTMRPNPAFSAEQVITELGVGEALISFLDEK	AAATGVMPLDMPESVLVR	AADM*TGSDVDAM*M*R
AAAQVNMDLGLLPAER	AAAVEQLQVWGER	AADM*TGSDVDAMM*R
AAASLAHHYPGGYNAFIK	AAAVINGPWAFQPYEAAGINFGVSPLPALPNGK	AADM*TGSDVDAMMR
AAATGVMPLDMPESVLVR	AADEGLEVAGSAM*ASDAFFPFR	AADMTGSDVDAM*M*R
AAAVARDELFITTK	AADEGLEVAGSAMASDAFFPFR	AADMTGSDVDAM*MR
AAAVEQLQVWGER	AADESELDNLLDADAYLAAIEE	AADMTGSDVDAMMR
AADEGLEVAGSAMASDAFFPFR	AADEVLDGAHPTEFPLAIWQTGSGTQTNMNMNEVLANR	AADSHMAGFWEFPGGK
AADEIYFIPEGTPLNVQLVK	AADFIAHQTSAK	AAEASTHYLLQNGHTR
AADESELDNLLDADAY	AADGSGYQFLVEILSDLNTR	AAEDLQLR
AADESELDNLLDADAYLAAIEE	AADLAAISGQKPFITK	AAEGIVPKPLDASQMAALVESLK
AADEVLDGAHPTEFPLAIWQTGSGTQTNMNMNEVLANR	AADLGQPFQFNNFRD	AAEGIVPKPLDASQMAALVESLKNPPAGEEEFLLDLLTNR
AADFIAHQTSAK	AADM*TGSDVDAM*M*	AAEGRPAPFLIHQESNVIVR
AADFIAHQTSAKR	AADM*TGSDVDAM*M*R	AAEIDKASWADYIK
AADGSGYQFLVEILSDLNTR	AADM*TGSDVDAM*MR	AAEIIHIGQAIMEQK
AADIHITPNGR	AADM*TGSDVDAMMR	AAELM*ENQM*QTLM*
AADLAAISGQKPFITK	AADMTGSDVDAM*	AAELMENQMQTLMGILVR
AADLGQPFQFNNFRD	AADMTGSDVDAM*M*R	AAEPLLEIIHAR
AADM*TGSDVDAM*M*R	AADMTGSDVDAM*MR	AAEQVTDQQM*ETAHFR
AADM*TGSDVDAMMR	AADMTGSDVDAMMR	AAEQVTDQQMETAHFR
AADMTGSDVDAM*M*R	AADSHMAGFWEFPGGK	AAEVADGDQLPVNITR
AADMTGSDVDAM*MR	AADTLANFLKDDSNIDAIQR	AAEVIPYPIEIISGQEEAR
AADMTGSDVDAMMR	AAEASTHYLLQNGHTR	AAEVTDDTQFAQWVELLLDQALLAER
AADNGDAWLEVK	AAEEQTEFDVVLASFGENK	AAFDDAIAAR
AADSHMAGFWEFPGGK	AAEGIILAK	AAFDFAVEHQAVER
AADVLGVPTLLIAR	AAEGIVPKPLDASQMAALVESLK	AAFNNDMVYMEK
AAEALKER	AAEGIVPKPLDASQMAALVESLKNPPAGEEEFLLDLLTNR	AAFSFQGHPEASPGPHDAAPLFDHFIELIEAYR
AAEDENDAKVEGDRR	AAEGRPAPFLIHQESNVIVR	AAFSQFASDLDDATR
AAEESTGTFPVGLDK	AAEIIHIGQAIMEQK	AAFSQFASDLDDATRK
AAEGIVPKPLDASQMAALVESLK	AAELAVLPAEQFNR	AAFVPDHLEVINESYR
AAEGIVPKPLDASQMAALVESLKNPPAGEEEFLLDLLTNR	AAELM*ENQM*QTL	AAFVSGTGMNNAEK
AAEGRPAPFLIHQESNVIVR	AAELM*ENQM*QTLM*	AAGADALELGIPFSDPLADGPTIQNAALR
AAEIIHIGQAIMEQK	AAELM*ENQM*QTLM*GILVREAGKTFSNAIAEVR	AAGAPADTGVFWESAGEGDYTIADITK
AAELAVLPAEQFNR	AAELM*ENQMQTLMGILVR	AAGAPADTGVFWESAGEGDYTIADITKDER
AAELEVVLPLSFFEK	AAELMENQMQTLMGILVR	AAGASLIQIYSGFIFR
AAELM*ENQM*QTL	AAENGADVAIIDLEDSVSQADK	AAGATVAIIDK
AAELM*ENQM*QTLM*	AAENGADVAIIDLEDSVSQADKEQAR	AAGATVAIIDKAIETMR
AAELM*ENQMQTLMGILVR	AAEPLLEIIHAR	AAGAWATINYR
AAELMENQMQTLMGILVR	AAEQVTDQQM*ETAHFR	AAGDKDAAQK
AAEMGAQVIK	AAEQVTDQQMETAH	AAGEEWLTMPNHPNNPEMGSR
AAENGADVAIIDLEDSVSQADKEQAR	AAEQVTDQQMETAHFR	AAGGHLDPNK
AAEQLEAIK	AAEVADGDQLPVNITR	AAGIKSGSGVPNKDK
AAEQVTDQQM*ETAHFR	AAEVIPYPIEIISGQEEAR	AAGKPYAHLLR
AAEQVTDQQMETAHFR	AAEVTDDTQFAQWVELLLDQALLAER	AAGLAIFGPTQAAAQLEGSK
AAETLQLPTSSYR	AAFDDAIAAR	AAGLEGVQSPIAK
AAEVADGDQLPVNITR	AAFDFAVEHQAVER	AAGM*HLQESLMEQGASR
AAEVIPYPIEIISGQEEAR	AAFEQASELR	AAGM*IPLGIEGQGVSDWIVVDLGEVIVHVMQEESR
AAEVTDDTQFAQWVELLLDQALLAER	AAFGSVLGAFPEFYGQFADNAR	AAGMHLQESLMEQGASR
AAFDDAIAAR	AAFNNDMVYMEK	AAGMIPLGIEGQGVSDWIVVDLGEVIVHVMQEESR
AAFDFAVEHQAVER	AAFQIANGVSIQEVVASGLQGLAIRDELQR	AAGMMGLTAEMLAK
AAFGSVLGAFPEFYGQFADNAR	AAFSFQGHPEASPGPHDAAPLFDHFIELIEAYR	AAGMNPMDLKR
AAFNNDMVYMEK	AAFSQFASDLDDATR	AAGNIEVSGE
AAFQIANGVSIQEVVASGLQGLAIRDELQR	AAFVPDHLEVINESYR	AAGVELIEHPEWIAR
AAFQQADTAADLVISSGGVSVGEADYTK	AAFVSGTGM*NNAEK	AAGYGKPFK
AAFRDFNQLIQNYPNSQYATDAQKR	AAFVSGTGMNNAEK	AAGYSNIEYHK
AAFSFQGHPEASPGPHDAAPLFDHFIEL	AAGAPADTGVFWESAGEGDYTIADITK	AAHAIAGLK
AAFSFQGHPEASPGPHDAAPLFDHFIELIEAYR	AAGAPADTGVFWESAGEGDYTIADITKDER	AAHAIAGLKGDNED
AAFSQFASDLDDATR	AAGATVAIIDK	AAHAIAGLKGDNEDQNVGIK
AAFSQFASDLDDATRK	AAGAWATINYR	AAHFADYLLQNK
AAFVPDHLEVINESYR	AAGDKDAAQK	AAHSPAWQEAR
AAFVSGTGMNNAEK	AAGGHLDPNK	AAIAAAEANPQLK
AAGAPADTGVFWESAGEGDYTIADITK	AAGGSNAM*QGFSR	AAIAAGDKDAAQK
AAGAPADTGVFWESAGEGDYTIADITKDER	AAGGSNAMQGFSR	AAIEAAGGK
AAGASLIQIYSGFIFR	AAGIHLVLATQRPSVDVITGLIK	AAIEAAGGKIEE
AAGATVAIIDK	AAGIKSGSGVPNKDK	AAIEEAHQVTDKPSLLMCK
AAGDGTTTATVLAQSIITEGLK	AAGILNANLR	AAIEQFEQDWQGAFGTTMLS
AAGDKDAAQK	AAGIQDVTFQTSEQQLILNTATAYFNVLR	AAIERDFGSVDSFKEKFEQAAATR
AAGGHLDPNK	AAGKPYAHLLR	AAIEYAITNDR
AAGGSNAM*QGFSR	AAGLAIFGPTQAAAQLEGSK	AAIEYAITNDRESVTLVHK
AAGIQDVTFQTSEQQLILNTATAYFNVLR	AAGLEGVQSPIAK	AAIGAGPGSLGPVNLS
AAGKPYAHLLR	AAGM*HLQESLM*EQGASR	AAIGAGPGSLGPVNLSLPVIADR
AAGLAIFGPTQAAAQLEGSK	AAGM*HLQESLMEQGASR	AAIHPAQISTINTLFTPTAAEIR
AAGLEGVQSPIAK	AAGMHLQESLMEQGASR	AAILAGRITLDSAAVAKAM*LNFHGR
AAGM*HLQESLM*EQGASR	AAGMIPLGIEGQGVSDWIVVDLGEVIVHVMQEESR	AAILLADSFK
AAGM*HLQESLMEQGASR	AAGMMGLTAEMLAK	AAILLDTKGPEIR
AAGM*NPMDLKR	AAGMNPMDLKR	AAIPTYYGGIMTFAWATQNPALR
AAGMHLQESLMEQGASR	AAGNIEVSGE	AAISLQGAHLLAYQPSGEQPIIWLSNNTPFK
AAGMIPLGIEGQGVSDWIVVDLGEVIVHVMQEESR	AAGVELIEHPEWIAR	AAITAAYR
AAGMMGLTAEMLAK	AAGWSVGGGGNIGVPALTLLK	AAITESLKEGDPVQLVGFGTFK
AAGMNPMDLKR	AAGYELGK	AAIVTFDPLAKDIVIKQ
AAGNIEVSGE	AAGYELGKDITLAMDCAASEFYKDGK	AAKDLGNM*PPNICNAAYLASQAR
AAGVELIEHPEWIAR	AAGYGKPFK	AALAAEDIK
AAGWSVGGGGNIGVPALTLLK	AAGYSNIEYHK	AALAQISDLPADSEVVEQAVSVYNAMQQK
AAGYELGK	AAHAIAGLK	AALAQRPDGYDYAWLADALDK
AAGYELGKDITLAMDCAASEFYKDGK	AAHAIAGLKGDNED	AALASALGEYFER
AAGYGKPFK	AAHAIAGLKGDNEDQNVGIK	AALDAGQPVDLAR
AAGYSNIEYHK	AAHDSLTGLANR	AALDGADM*VFIAAGM*GGGTGTGAAPVVAEVAK
AAHAIAGLK	AAHFADYLLQNK	AALDGADMVFIAAGMGGGTGTGAAPVVAEVAK
AAHAIAGLKGDNED	AAHGNSLR	AALEDMKSPEMVAAK
AAHAIAGLKGDNEDQNVGIK	AAHLLGLTYHQLR	AALELAEQR
AAHDSLTGLANR	AAHPEQALDNLPFWMTGEAWGHGVMK	AALESTLAAITESLK
AAHFADYLLQNK	AAHSATAIWK	AALESTLAAITESLKEGD
AAHLLGLTYHQLR	AAHSPAWQEAR	AALESTLAAITESLKEGDPVQLV
AAHTHILAVNGEIYNHQALR	AAHTHILAVNGEIYNHQALR	AALESTLAAITESLKEGDPVQLVG
AAIAAAEANPQLK	AAIAAAEANPQLK	AALESTLAAITESLKEGDPVQLVGFGTF
AAIAAGDKDAAQK	AAIAAGDKDAAQK	AALESTLAAITESLKEGDPVQLVGFGTFK
AAIEAAGGK	AAIEAAGGK	AALHQIIEPSREEK
AAIEAAGGKIEE	AAIEAAGGKIEE	AALIECLAPDR
AAIEQFEQDWQGAFGTTM*LS	AAIEQFEQDWQGAFGTTM*LS	AALIEQADKVWHLGNGYTNEPVLR
AAIEQFEQDWQGAFGTTMLS	AAIEQFEQDWQGAFGTTMLS	AALLFPLVDANIVDETTLTEQFGK
AAIERDFGSVDSFKEKFEQAAATR	AAIERDFGSVDSFKEKFEQAAATR	AALLSMSPVLNR
AAIEYAITNDR	AAIEYAITNDR	AALMMGINR
AAIEYAITNDRESV	AAIEYAITNDRESVTLVHK	AALNMMTR
AAIEYAITNDRESVTLVHK	AAIGAGPGSLGPVNLSLPVIADR	AALNSQLGEPWDTIR
AAIEYAITNDRESVTLVHKGNIMK	AAIHPAQISTINTLFTPTAAEIR	AALPAAVAGQTLPSLAPMLEK
AAIGAGPGSLGPVNLSLPVIADHSVAVMSDFGAGANIDGK	AAILLADSFK	AALQFIRPGDCILLDNSSSCWFLAR
AAIHPAQISTINTLFTPTAAEIR	AAILLDTKGPEIR	AALQISQM*GLS
AAILLADSFK	AAIPVGAADEGVGESDIR	AALQISQM*GLSCALISK
AAILLDTKGPEIR	AAISLQGAHLLAYQPSGEQPIIWLSNNTPFK	AALQNSILK
AAIPVGAADEGVGESDIR	AAITAAYR	AALSAGLDVFGIEDGYLGLYENR
AAISAEFGVKPFLPDHIQFIHSESLR	AAITESLKEGDPVQLVGFGTFK	AALTQEERDKLTPDQIVESLK
AAISLQGAHLLAYQPSGEQPIIWLSNNTPFK	AALAAEDIK	AALTTLALAQEESFGDQKPADDLLNLAGLER
AAISLQGAHLLAYQPSGEQPIIWLSNNTPFKEGIAIR	AALAAGGAAAANVEIPGVASSGTPSSDVGR	AALVDYFLHIEGVDGESPDQQYNGWIQVQAWQWAEENAGR
AAITAAYR	AALAQISGLPADSEVVEQAVSVYNAMQQK	AALYGIPLPWIAVE
AAITESLKEGDPVQLVGFGTFK	AALAQRPDGYDYAWLADALDK	AAM*ADVLK
AAIVTFDPLAKDIVIKQ	AALASALGEYFER	AAM*ANAEVGDDVYGDDPTVNALEAK
AAKDLGNM*PPNICNAAYLASQAR	AALDGADM*VFIAAGM*GGGTGTGAAPVVAEVAK	AAM*ASGVATRPITDFNAYVEK
AAKPQDHSQK	AALDGADM*VFIAAGMGGGTGTGAAPVVAEVAK	AAM*TYHLDVVSAEKK
AALAAEDIK	AALDGADMVFIAAGMGGGTGTGAAPVVAEVAK	AAMANAEVGDDVYGDDPTVNALEAK
AALAAGGAAAANVEIPGVASSGTPSSDVGR	AALEDMKSPEMVAAK	AAMASGVATR
AALAQISGLPADSEVVEQAVSVYNAMQQK	AALELAEQR	AAMASGVATRPITDFNAYVEK
AALAQRPDGYDYAWLADALDK	AALESTLAAITESLK	AAMNNLSVSDFEGLPQAISAIEQVISGEQPFR
AALASALGEYFER	AALESTLAAITESLKEGD	AAMTYHLDVVSAEK
AALAYGLDKEVGNR	AALESTLAAITESLKEGDPVQLV	AAMTYHLDVVSAEKK
AALDGADM*VFIAAGM*GGGTGTGAAPVVAEVAK	AALESTLAAITESLKEGDPVQLVG	AANAGGVATSGLEM*AQ
AALDGADMVFIAAGM*GGGTGTGAAPVVAEVAK	AALESTLAAITESLKEGDPVQLVGFGTF	AANAGGVATSGLEM*AQN
AALDGADMVFIAAGMGGGTGTGAAPVVAEVAK	AALESTLAAITESLKEGDPVQLVGFGTFK	AANAGGVATSGLEMAQNAAR
AALEDMKSPEMVAAK	AALESTLAAITESLKEGDPVQLVGFGTFKV	AANHLDIPLKHILHVGDDLTTDVAGSLR
AALELAEQR	AALGGVSYFIHGLMR	AANKFPAIVYGGSEAAISIALDHDTTK
AALESTLAAITESLK	AALHQIIEPSR	AANSQSEDSEAAR
AALESTLAAITESLKEGDPVQLV	AALHQIIEPSREEK	AANTQAMIATMAQGNVHIISHPGNPK
AALESTLAAITESLKEGDPVQLVGF	AALIECLAPDR	AANVPVVVAVNK
AALESTLAAITESLKEGDPVQLVGFGT	AALIEQADKVWHLGNGYTNEPVLR	AANVPVVVAVNKIDKPEADPDR
AALESTLAAITESLKEGDPVQLVGFGTFK	AALLFPLVDANIVDETTLTEQFGK	AANVPVVVAVNKIDKPEADPDRVK
AALESTLAAITESLKEGDPVQLVGFGTFKV	AALLSMSPVLNR	AANVVGIQM*E
AALGMTAAGVIGGIGLGLPQISYAAALTQEER	AALMMGINR	AANVVGIQM*EFVK
AALHQIIEPSR	AALNM*M*TR	AANVVGIQMEFVK
AALHQIIEPSREEK	AALNMMTR	AAPAVVNVYNR
AALIECLAPDR	AALNSQLGEPWDTIR	AAPCIIFIDEIDAVGR
AALLAGFGHNNTR	AALPAAVAGQTLPSLAPMLEK	AAQEEEFSLELR
AALLFPLVDANIVDETTLTEQFGK	AALQFIRPGDCILLDNSSSCWFLAR	AAQEVANHLGTVHHEIHFTVQEGLDAIR
AALLSMSPVLNR	AALQISQM*GLS	AAQFAEDASPMAHAIRPDK
AALMMGINR	AALQISQMGLS	AAQIEGDSFHR
AALNM*M*TR	AALQNSILK	AAQISALVMSVAFL
AALNMMTR	AALQQQFEHIAALAAPLMALPLDER	AAQQLLDQLSNSQPIQQIIIPGQLV
AALNSQLGEPWDTIR	AALSAGLDVFGIEDGYLGLYENR	AAQQLSQALGQTK
AALPAAVAGQTLPSLAPM*LEK	AALTQEERDKLTPDQIVESLK	AAQQLSQALGQTKDENLLSLINLR
AALPAAVAGQTLPSLAPMLEK	AALTTLALAQEESFGDQKPADDLLNLAGLER	AAQQSDIALISIGR
AALQISQM*GLS	AALVDYFLHIEGVDGESPDQQYNGWIQVQAWQWAEENAGR	AAQQVRPLTLTR
AALQISQM*GLSCALISK	AAM*ANAEVGDDVYGDDPTVNALEAK	AAQVTM*ITR
AALQISQMGLSCALISK	AAM*ASGVATRPITDFNAYVEK	AAQVTMITR
AALQNSILK	AAM*QLHGIDAGNPR	AARVSDSAAEYILEK
AALSAGLDVFGIEDGYLGLYENR	AAM*TYHLDVVSAEK	AASDSQAAASVER
AALTEADAQAYLLSYQQAIHAIGK	AAM*TYHLDVVSAEKK	AASEGELK
AALTQEERDKLTPDQIVESLK	AAMANAEVGDDVYGDDPTVNALEAK	AASEGELKGVLGYTEDDVVSTDFNGEK
AALTTLALAQEESFGDQKPADDLLNLAGLER	AAMASGVATRPITDFNAYVEK	AASEVAHAVLGK
AALVDYFLHIEGVDGESPDQQYNGWIQVQAWQWAEENAGR	AAMNNLSVSDFEGLPQAISAIEQVISGEQPFRR	AASEVAHAVLGKLPKPR
AAM*ADVLK	AAMTYHLDVVSAEK	AASFETSLSELEQIVTR
AAM*ANAEVGDDVYGDDPTVNALEAK	AAMTYHLDVVSAEKK	AASFETSLSELEQIVTRLESGELPLEDALNEFER
AAM*ANKELHTIPR	AANAGGVATSGLEMAQNAAR	AASFFGSVGGK
AAM*QLHGIDAGNPR	AANKFPAIVYGGSEAAISIALDHDTTK	AASFGNVHGVYKPGNVK
AAM*TYHLDVVSAEK	AANKLDNVK	AASKPEYVKPDDVPAEVVAR
AAM*TYHLDVVSAEKK	AANNATQTYNNHYQNGTHTK	AASLLHGLGFSQEK
AAMANAEVGDDVYGDDPTVNALEAK	AANSQSEDSEAAR	AASLTGAGATFPAPVYAK
AAMASGVATRPITDFNAYVEK	AANTQAMIATMAQGNVHIISHPGNPK	AASNENNWDLNYGEIAK
AAMPAELNQDQQLEVLIDLFYR	AANVPAFVSGK	AASQAEVVAAE
AAMPNHGILINIAR	AANVPVVVAVNK	AASSVKDTNLESVDEEETESEPEQ
AAMTYHLDVVSAEK	AANVPVVVAVNKIDKPEADPDR	AASTISVGYDNFDVEALSQR
AAMTYHLDVVSAEKK	AANVPVVVAVNKIDKPEADPDRVK	AATEVEM*K
AANAGGVATSGLEM*AQ	AANVVGIQM*EFVK	AATGVMPLDMPESVLVR
AANAGGVATSGLEM*AQN	AANVVGIQMEFVK	AATILAEQLEAFVDLR
AANAGGVATSGLEM*AQNAAR	AAPAYKEDHPYQK	AATPELELGKLPLGSRPAK
AANAGGVATSGLEMAQNAAR	AAPCIIFIDEIDAVGR	AATQNTPAATGQVQSLTR
AANHLDIPLKHILHVGDDLTTDVAGSLR	AAPILSSLYYSDGK	AATRGDGTTGENITANVR
AANKFPAIVYGGSEAAISIALDHDTTK	AAPNSSIIPLLPEPLWLPADLGVLR	AATSVLSDGWTVVTK
AANSQSEDSEAAR	AAPTGARPQAVINTAK	AAVAGIAMGLVK
AANTQAMIATMAQGNVHIISHPGNPK	AAQEEEFSLELR	AAVASGSDRFFLGTDSAPHAK
AANVPVVVAVNK	AAQEVANHLGTVHHEIHFTVQEGLDAIR	AAVAWGPNQPLSVEEVDLMPPQK
AANVPVVVAVNKIDKPEADPDR	AAQFAEDASPM*AHAIRPDK	AAVDDLAGQSAK
AANVSFNCCCCSDDSTPLMANSLLLSVM*LK	AAQFAEDASPMAHAIRPDK	AAVEDAQDIAALDLVR
AANVVGIQM*E	AAQILALHDTELAGR	AAVEEGVVAGGGVALIR
AANVVGIQM*EFVK	AAQILHDK	AAVFHEGLSLIER
AANVVGIQM*EFVKVILSGEVNR	AAQLEPVGVITANGATSLSSLK	AAVGSEVTVR
AANVVGIQMEFVK	AAQPPVASSGLPLTLISLDDWALVTLTGADR	AAVLAEVEALIGEDTVLASNTSTIPIDQLAK
AANVVGIQMEFVKVILSGEVNR	AAQQLLDQLSNSQPIQQIIIPGQLV	AAVLDDSIGQTWR
AAPAAAGGGLPGILPWPK	AAQQLSQALGQTK	AAVLMSAPR
AAPADPILGLTDIFR	AAQQLSQALGQTKDENLLSLINLR	AAWLGIVPEFNPFK
AAPAYKEDHPYQK	AAQQSDIALISIGR	AAWMYYVAGQTQHEIAEALGVSR
AAPCIIFIDEIDAVGR	AAQQVRPLTLTR	AAYAIDDNGQR
AAPILSSLYYSDGK	AAQVAAER	AAYALEQQGLVSAPVSTVI
AAPQGIYETLIDMANR	AAQVTM*ITR	AAYDLLLLR
AAQEEEFSLELR	AAQVTMITR	AAYDQYGHAAFEQGGMGGGGFGGGGGGADFSDIFGDVFGDIFGGGR
AAQERSDIEIVAINDLLDADYM*AYM*LK	AASAYYNAK	AAYEAFQSGMSEFDINLAYLMATGHR
AAQERSDIEIVAINDLLDADYM*AYMLK	AASDSQAAASVER	AAYSNLAYDLLADALSR
AAQERSDIEIVAINDLLDADYMAYMLK	AASEGELK	AAYSSGKPAIGVGAGNTPVVVDETADIKR
AAQEVANHLGTVHHEIHFTVQEGLDAIR	AASEGELKGVLGYTEDDVVSTDFNGEK	ACAEAGVFLISPFVGR
AAQFAEDASPM*AHAIRPDK	AASEVAHAVLGK	ACLSPTVSPNNCCSSASERLLSPKRKSAGLP
AAQFAEDASPMAHAIRPDK	AASFETSLSELEQIVTR	ADAALLDELVNNIVFTAR
AAQLEPVGVITANGATSLSSLK	AASFFGSVGGK	ADAFAVIVK
AAQMVVEHHQGEFPTTFDQILALPGIGR	AASFGNVHGVYKPGNVK	ADAGGITDIEFIAQYLVLR
AAQNGDILVSYIR	AASGQLQQTHLLK	ADALFTIASWESGPHDINFLTIAALDKPLSELQK
AAQPPVASSGLPLTLISLDDWALVTLTGADR	AASKPEYVKPDDVPAEVVAR	ADALLNADAAALLALLTSEYVEQSK
AAQQLLDQLSNSQPIQQIIIPGQLV	AASLLHGLGFSQEK	ADALSGWVNHFLLGLGMLQPK
AAQQLSQALGQTK	AASLTGAGATFPAPVYAK	ADAQEQQPAVDTK
AAQQLSQALGQTKDENLLSLINLR	AASNENNWDLNYGEIAK	ADATSPVVTNSAFK
AAQQVRPLTLTR	AASQAEVVAAE	ADAVLHDTPNILYFIK
AAQSPLADK	AATDNGGSLIK	ADAVTAAGVEVAK
AAQVTM*ITR	AATGIQYEGR	ADDEISSQLAALK
AAQVTMITR	AATILAEQLEAFVDLR	ADDKFAALEAAGVK
AAQVTMITRLELAFK	AATPELELGKLPLGSR	ADDSLNKLADEENPEQQEAEK
AAQYNTM*M*SNLVAK	AATPELELGKLPLGSRPAK	ADDSLNKLADEENPEQQEAEKALEPFVER
AASDSQAAASVER	AATQNTPAATGQVQSLTR	ADEDVQFEGR
AASEGELK	AATRGDGTTGENITANVR	ADEFIEALFAR
AASEGELKGVLGYTEDDVVSTDFNGEK	AAVAGIAMGLVK	ADEFPPANAAIIELLTK
AASFETSLSELEQIVTR	AAVAMGKPWSEK	ADEIQIYK
AASFETSLSELEQIVTRLESGELPLEDALNEFER	AAVAWGPNQPLSVEEVDLMPPQK	ADENDIRLPGEVAFFIAK
AASFFGSVGGK	AAVAWGPNQPLSVEEVDLMPPQKGEVLVR	ADFADSFTANAVHGSDAVESAQR
AASFGNVHGVYKPGNVK	AAVDDLAGQSAK	ADFREEANKQYKR
AASGQLQQTHLLK	AAVEEGVVAGGGVALIR	ADFYHFTGLTESTIRPQLDEAIAK
AASIPQALLASQPGPVNVAGLSK	AAVEGAQDIAALDLVR	ADGAYLFDVDGK
AASKPEYVKPDDVPAEVVAR	AAVFHEGLSLIER	ADGFVVNDIHFEGLQR
AASLTGAGATFPAPVYAK	AAVGSEVTVR	ADGGTLFLDELATAPMLVQEK
AASNENNWDLNYGEIAK	AAVLAEVEALIGEDTVLASNTSTIPIDQLAK	ADGIDPNELLQASAAAK
AASQAEVVAAE	AAVLMSAPR	ADGSGTSFVFTSYLAK
AASQVAER	AAVWAAIK	ADGTYQAINDK
AATDNGGSLIKELQLVYNK	AAWLGIVPEFNPFK	ADGTYQAINDKWFPQ
AATGIQYEGR	AAWMYYVAGQTQHEIAEALGVSR	ADGTYQTIYKK
AATGRPGVIAFSGAFHGR	AAYAIDDNGQR	ADGVFMQQWQGE
AATILAEQLEAFVDLR	AAYALEQQGLVSAPVSTVI	ADGVIFQTAV
AATPELELGKLPLGSR	AAYDLLLLR	ADGYHQLQTLFQFLDYGDQLTIEPR
AATPELELGKLPLGSRPAK	AAYDQYGHAAFEQGGMGGGGFGGGGGGADFSDIFGDVFGDIFGGGR	ADHDTFWFDATR
AATQNTPAATGQVQSLTR	AAYEAFQSGMSEFDINLAYLMATGHR	ADHLGLAQLHQLR
AATRGDGTTGENITANVR	AAYEVSNLELAIVNLTM*TNFR	ADHPLTTPPPK
AATSVLSDGWTVVTK	AAYEVSNLELAIVNLTMTNFR	ADHPLTTPPPKER
AAVAGIAMGLVK	AAYSNLAYDLLADALSR	ADHTLTFVALKPGLLTGQAR
AAVAWGPNQPLSVEEVDLMPPQK	AAYSPESQILAR	ADHVQKGEITVGAK
AAVAWGPNQPLSVEEVDLMPPQKGEVLVR	AAYSSGKPAIGVGAGNTPVVVDETADIKR	ADIDYNTSEAHTTYGVIGVK
AAVDDLAGQSAK	ACAEAGVFLISPFVGR	ADILLLDNIDSFTYNLVDQLR
AAVEEGVVAGGGVALIR	ACLTLALDAMGGDFGPCVTVPASLQALASNPQLK	ADISLAEAVK
AAVEGAQDIAALDLVR	ADAALDAGHDIQFIEQFR	ADITPANVDTVTR
AAVELAKDWRTDR	ADAALLDELVNNIVF	ADITVAFR
AAVFHEGLSLIER	ADAALLDELVNNIVFTAR	ADKIAIVNVSSIFQQLPAR
AAVGSEVTVR	ADAFAVIVK	ADKITVFAAASLTNALQDIAVQYK
AAVITESAHAGAHLINDIR	ADAGGITDIEFIAQYLVLR	ADKLFMPGVGTAHAAM*EQLR
AAVLAEVEALIGEDTVLASNTSTIPIDQLAK	ADALLNADAAALLALLTSEYVEQSK	ADKLFMPGVGTAHAAMEQLR
AAVNGPIAQAVIGK	ADALSGWVNHFLLGLGMLQPK	ADKLGINPDFYEKR
AAVVKENYLDTLR	ADAQEQQPAVDTK	ADKNITRPQNVADQPGLR
AAVWAAIKELHYSPSAVAR	ADATSPVVTNSAFK	ADKPLVGTGM*ER
AAWLGIVPEFNPFK	ADAVEALEGTGIPVIADGGIR	ADKPLVGTGMER
AAWMYYVAGQTQHEIAEALGVSR	ADAVLHDTPNILYFIK	ADKVVVTRPGGDQSK
AAWQIRHDAVLASGGLHIIGTER	ADAVTAAGVEVAK	ADLAVPNAPTSAPGVLVEALR
AAYALEQQGLVSAPVSTVI	ADCLGIIGVAR	ADLDDIKDGKDFGIGIPQQNPAFTLK
AAYDLLLLR	ADDAIASAAAR	ADLDKQPDSVSSVLK
AAYDQYGHAAFEQGGM*GGGGFGGGGGGADFSDIFGDVFGDIFGGGR	ADDEISSQLAALK	ADLIIDTSEMSVHELAEMLR
AAYDQYGHAAFEQGGMGGGGFGGGGGGADFSDIFGDVFGDIFGGGR	ADDKFAALEAAGVK	ADLLLGVNIDHIATLR
AAYEAFQSGMSEFDINLAYLMATGHR	ADEAQRENVQGLLAHLAQVWHSR	ADLNVPVK
AAYEVSNLELAIVNLTM*TNFR	ADEFPPANAAIIELLTK	ADLNVPVKEGK
AAYSNLAYDLLADALSR	ADEGYGSYDENLVQR	ADLWLAEYYDQR
AAYSPESQILAR	ADEILKQPR	ADLYQQAEIQLDKDSAIVPVFYYVSAR
AAYSSGKPAIGVGAGNTPVVVDETADIKR	ADEIQIYK	ADM*TGSDVDAM*M*R
ACAEAGVFLISPFVGR	ADESPLQHM*SR	ADMTGSDVDAMMR
ACGAVDYFCQHGHGLISK	ADFLSSVGVDR	ADNADLSGYTNSSYGADGTLGFPINENNSLR
ACLTLALDAMGGDFGPCVTVPASLQALASNPQLK	ADFSDSFTANAVHGSDAVESAQR	ADNFANEAVR
ADAALLDELVNNIVFTAR	ADGAINGEVAMK	ADNNDIKSEADLQGK
ADAFAVIVK	ADGAYLFDVDGK	ADNPFDALLPSAMAK
ADAGGITDIEFIAQYLVLR	ADGFVVNDIHFEGLQR	ADNSPLAALAENPQQLALWVEGFK
ADAIFIEELHK	ADGGTLFLDELATAPMLVQEK	ADNVASALIVQGVAANR
ADAKGSFDGGLDR	ADGIDPNELLQASAAAK	ADNYVHDNPWTGVGIGAAVGVVLGVLLSR
ADALLNADAAALLALLTSEYVEQSK	ADGLAAFHQLAQQLLIEDPTLVK	ADPAANAGTLK
ADALSGWVNHFLLGLGMLQPK	ADGTYQAINDK	ADPDKEQILVVNLSGR
ADAQEQQPAVDTK	ADGTYQTIYKK	ADPVSAVEAMAAAEGQLGLPHPR
ADATSPVVTNSAFK	ADGVFM*QQWQGE	ADQEFDGLYNDLLLEM*AR
ADATSPVVTNSAFKNNDQQSAYALGASLGR	ADGVFMQQWQGE	ADQEFDGLYNDLLLEMAR
ADAVLHDTPNILYFIK	ADGVIFQTAV	ADQIQWSNNIEPGSK
ADAVTAAGVEVAK	ADHDTFWFDATR	ADQPPFLTAQQVIF
ADAYLFTVSR	ADHLGLAQLHQLR	ADQPPFLTAQQVIFGLSWR
ADDEISSQLAALK	ADHPLTTPPPK	ADRDGIGGVICALINDFQHVR
ADDFLSVLDTFR	ADHPLTTPPPKER	ADSLTSQLLTAIKPLTEQAGLSR
ADEDVQFEGR	ADHTLTFVALKPGLLTGQAR	ADSPPRPTALIFDSGVGGLSVYQEIR
ADEFPPANAAIIELLTK	ADHVQKGEITVGAK	ADSVRDYLVSK
ADEGYGSYDENLVQR	ADIAGVPAQINIAEVR	ADTAIDTLQK
ADEIKHPVGR	ADIAVHSM*K	ADTDILDTTVK
ADEIQIYK	ADIDYNTSEAHTTYGVIGVK	ADTLEEVLQSSTDKPK
ADEIQIYKYVVHNVAHAFGK	ADILEAEGVR	ADTQEGYSLAPNASK
ADELAGSVHALALHTYTR	ADILLLDNIDSFTYNLVDQLR	ADTSVWDSITNALQIK
ADENDIR	ADILSPVKETGTLLGHVTAK	ADTVAQPENQADV
ADENDIRLPGEVAFFIAK	ADIQTLIAAVEQAGYHATQQGIDSPK	ADVAEAPVIEEVQPEQEER
ADESPLQHM*SR	ADISITATAK	ADVEKLPIPDPEQELGYVMNAVR
ADFAGMNAAWDAWVVDGNAPVR	ADISLAEAVK	ADVLAAAEAR
ADFEVNNADVVNFLK	ADISLAEAVKR	ADVLAQLAGLQQEISQLHDNAQQNQSHFVLLER
ADFIAHQTSAK	ADISVHEPR	ADVQAAKDDAAR
ADFIAHQTSAKR	ADITPANVDTVTR	ADVQAAKDDAARANQR
ADFLSSVGVDR	ADITVAFR	ADVTEALLAQDDTLDAAEIQDILASVEK
ADFREEANKQYKR	ADKANM*LAATTK	ADWAMTSLK
ADFSDSFTANAVHGSDAVESAQR	ADKANMLAATTK	ADWLSQPEPGWQPKPLDDVR
ADGFVVNDIHFEGLQR	ADKIAIVNVSSIFQQLPAR	ADWQAYLQWAVDAFK
ADGIDPNELLQASAAAK	ADKITVFAAASLTNALQDIAVQYK	ADYKELDPEVQNQVQQLWDQVTNDNIYQLTDFVGYK
ADGLAAFHQLAQQLLIEDPTLVK	ADKLFM*PGVGTAHAAMEQLR	ADYKIDKEGQHAFIEFR
ADGTYQAINDK	ADKLFMPGVGTAHAAM*EQLR	ADYVSITDDEALDAFK
ADGTYQTIYKK	ADKLFMPGVGTAHAAMEQLR	AEAAELEVDELKSQLADYQQALDVQQTR
ADGVFMQQWQGE	ADKLGINPDFYEKR	AEAAPAAAGGGLPGMLPWPK
ADGVIFQTAV	ADKNITRPQNVADQPGLR	AEAGDVANAILDGTDAVM*LSGESAK
ADGYHQLQTLFQFLDYGDQLTIEPR	ADKPLVGTGM*ER	AEAGDVANAILDGTDAVMLSGESAK
ADHDTFWFDATR	ADKPLVGTGMER	AEAGIVISASHNPFYDNGIK
ADHLGLAQLHQLR	ADKVVVTRPGGDQSK	AEAHINNSHGDVDYAQASAELAK
ADHPLTTPPPK	ADLAVPNAPTSAPGVLVEALR	AEAHSALHPGQSAAIYLAGEHIGFIGVVHPELER
ADHPLTTPPPKER	ADLDDIKDGKDFGIGIPQQNPAFTLK	AEAIHYIGDLVQR
ADHTLTFVALKPGLLTGQAR	ADLDKQPDSVSSVLK	AEAPLGIVYGSDAVASK
ADHVQKGEITVGAK	ADLIIDTSEMSVHELAEMLR	AEAQAGADAAMANFALWR
ADIAGVPAQINIAEVR	ADLKSPQVLVLAPTR	AEAQVIIEQASK
ADIAVFDK	ADLLLGVNIDHIATLR	AEAQVIIEQASKR
ADIDYNTSEAHTTYGVIGVK	ADLNANYIQVGNTR	AEAVATDEAMDDIILASDVVMVAR
ADILEAEGVR	ADLNVPVK	AEAVTSAIMQAK
ADILSPVKETGTLLGHVTAK	ADLNVPVKEGK	AEDDLAAALTENGIPFDYQPGEGAFYGPK
ADIQTLIAAVEQAGYHATQQGIDSPK	ADLVLWDPR	AEDEAINVFAR
ADISLAEAVK	ADLWLAEYYDQR	AEDFGQGSVSSLLLHEALNER
ADISVHEPR	ADLYQQAEIQLDKDSAIVPVFYYVSAR	AEDKGTLVVNKPQSLR
ADITPANVDTVTR	ADM*TGSDVDAM*M*R	AEDLSAHLM*R
ADITVAFR	ADM*TGSDVDAM*MR	AEDLSAHLMR
ADITVAFRNPHALNSAR	ADM*VDGQTITR	AEDSPEIK
ADKANM*LAATTK	ADMTGSDVDAM*M*R	AEDSPEIKDYR
ADKANMLAATTK	ADMTGSDVDAMMR	AEEAAEM*AISSPLLEDIDLSGAR
ADKIAIVNVSSIFQQLPAR	ADMVDGQTITR	AEEAAEMAISSPLLEDIDLSGAR
ADKITVFAAASLTNALQDIAVQYK	ADNADLSGYTNSSYGADGTLGFPINENNSLR	AEEKPAAPAQAAAPAASAAK
ADKLFM*PGVGTAHAAMEQLR	ADNNDIKSEADLQGK	AEELAEER
ADKLFMPGVGTAHAAMEQLR	ADNVASALIVQGVAANR	AEEMTVITGSLK
ADKLGINPDFYEKR	ADNYVHDNPWTGVGIGAAVGVVLGVLLSR	AEFADQIATILQQAHALPK
ADKNITRPQNVADQPGLR	ADPAANAGTLK	AEFGEVDILVNNAGITR
ADKPLVGTGM*ER	ADPDKEQILVVNLSGR	AEFTQLVR
ADKPLVGTGMER	ADPNYFTTLANIAK	AEGDGEGFIVIDDLVDTGGTATAIR
ADKVVVTRPGGDQSK	ADPVSAVEAMAAAEGQLGLPHPR	AEGDILLDGQNILTDKQDIALLR
ADLAAISGQKPFITK	ADPYAFEAQMRPETASLISPLPDVVK	AEGDSALR
ADLAVPNAPTSAPGVLVEALR	ADQEFDGLYNDLLLEM*AR	AEGHEFYTLGGLDVSPDNQLLAVAEDYLSR
ADLDDIKDGKDFGIGIPQQNPAFTLK	ADQEFDGLYNDLLLEMAR	AEGHEFYTLGGLDVSPDNQLLAVAEDYLSRR
ADLDKQPDSVSSVLK	ADQIQWSNNIEPGSK	AEGPTAFVSIM*EGCNK
ADLGLETILVER	ADQPPFLTAQQVIFGLSWR	AEGQALGVNAWQVGPTTADPAEQVR
ADLIIDTSEMSVHELAEMLR	ADRQPEFTQIDVETSFMSADQVR	AEGYFDGYDR
ADLKSPQVLVLAPTR	ADSINENQATQLQPM*GTITVSGLNGAPSDIR	AEGYFDGYDRK
ADLKSPQVLVLAPTRELAVQVAEALSSFSK	ADSINENQATQLQPMGTITVSGLNGAPSDIR	AEHDLDATAIK
ADLLLGVNIDHIATLR	ADSLTSQLLTAIKPLTEQAGLSR	AEHGIVFGEPK
ADLNANYIQVGN	ADSPPRPTALIFDSGVGGLSVYQEIR	AEHNESYYPVAAALLDVSTNQPA
ADLNANYIQVGNTR	ADSVRDYLVSK	AEHVLTMLNEHEVK
ADLNVPVK	ADTAIDTLQK	AEIEGEIGDSHM*GLAAR
ADLNVPVKEGK	ADTDSAFFQAVR	AEIEGEIGDSHMGLAAR
ADLTASTTATATLVEPAR	ADTLEEVLQSSTDKPK	AEIGTLPVGSK
ADLYQQAEIQLDKDSAIVPVFYYVSAR	ADTVAQPENQADV	AEIIAHGR
ADM*SM*QAIR	ADVAEAPVIEEVQPEQEER	AEIIAHGRGEK
ADM*TGSDVDAM*M*R	ADVEKLPIPDPEQELGYVMNAVR	AEISDDEYK
ADM*TGSDVDAMMR	ADVINLVLSNMTMADFDK	AEKELIVATDTAFVPFEFK
ADM*VDGQTITR	ADVLAAAEAR	AEKIDGQWVTHQWLK
ADMTGSDVDAM*M*R	ADVLAQLAGLQQEISQLHDNAQQNQSHFVLLER	AEKIDNEEVLIM*SESDILAIVEA
ADMTGSDVDAMMR	ADVQAAKDDAAR	AEKIDNEEVLIMSESDILAIVEA
ADMVDGQTITR	ADVQAAKDDAARANQR	AELAAHEMIKPVAQR
ADNADLSGYTNSSYGADGTLGFPINENNSLR	ADVTEALLAQDDTLDAAEIQDILASVEK	AELDAETAPK
ADNDSMFNTPPTFAWYLSGLVFK	ADWAMTSLK	AELDKLQNEIR
ADNPFDALLPSAMAK	ADWLSQPEPGWQPKPLDDVR	AELDTALVTDSGENEDGL
ADNYVHDNPWTGVGIGAAVGVVLGVLLSR	ADWQAYLQWAVDAFK	AELFLHYSKEQLPETLDTLIDELAR
ADPAANAGTLK	ADYIWFNGEMVPWAEAK	AELGIPASIR
ADPAQAESIKR	ADYKELDPEVQNQVQQLWDQVTNDNIYQLTDFVGYK	AELIAAAMR
ADPDDQSLISTALR	ADYVSITDDEALDAFK	AELLYGAIDR
ADPNYFTTLANIAK	AEAAELEVDELKSQLADYQQALDVQQTR	AEM*ADPQLAQR
ADPVSAVEAMAAAEGQLGLPHPR	AEAAPAAAGGGLPGILPWPK	AEM*SPPISAGQR
ADQEFDGLYNDLLLEM*AR	AEAAVVGVPHNIK	AEMELFAAQAAEVDIIVTTALIPGRPAPR
ADQEFDGLYNDLLLEMAR	AEAEEHGEHSAEQLHAR	AEMHYIVR
ADQIQWSNNIEPGSK	AEAEINNNNGFAAGEAVQH	AEMMAVLAHAGMTR
ADQPPFLTAQQVIFGLSWR	AEAFSQDPDFYAFIR	AEMNIAPGKPLEVMLR
ADSAQAALKLPDDLK	AEAGDVANAILDGTDAVM*LSGESAK	AEMSEHLFEK
ADSITSQLER	AEAGDVANAILDGTDAVMLSGESAK	AENEDGNHDSFTR
ADSLTSQLLTAIKPLTEQAGLSR	AEAGIVISASHNPFYDNGIK	AENHLPIEDR
ADTAIDTLQK	AEAIHYIGDLVQR	AENQYYGTGR
ADTDSAFFQAVR	AEAPLGIVYGSDAVASK	AENSQEPIKEHLLLTR
ADTLANFLKDDSNIDAIQR	AEAPLGIVYGSDAVASKK	AEPDTSALAELAQTLLAPR
ADTLEEVLQSSTDKPK	AEAQVIIEQASK	AEPLNITTDLPGR
ADTVAQPENQADV	AEAQVIIEQASKR	AEPVIDAEQDNGDALPVINPAEPADVVGYVR
ADVAEAPVIEEVQPEQEER	AEAVATDEAMDDIILASDVVMVAR	AEQGKLDPVIGR
ADVAHHISQMIEDPATYYQAYALIEPGLAR	AEAVTSAIMQAK	AEQGKLDPVIGRDEEIRR
ADVEKLPIPDPEQELGYVMNAVR	AEDDLAAALTENGIPFDYQPGEGAFYGPK	AEQIIAEQVPIAPIYQFTNGR
ADVGIRDGK	AEDEAINVFAR	AERGELYHLR
ADVINLVLSNMTMADFDK	AEDFGQGSVSSLLLHEALNER	AERGIATCVLLGNPEEIQR
ADVINLVLSNMTMADFDKAATSLEASAK	AEDIPLLANHLLR	AESAGIPHHALDAK
ADVLAAAEAR	AEDKGTLVVNKPQSLR	AESALKDTR
ADVLGVPTLLIAR	AEDLSAHLM*R	AESFQAVADAVVDYHQSGPVEYIEFPEK
ADVQAAKDDAAR	AEDLSAHLMR	AESGALSTGEAIGTGMSILVMVVQSWEEESR
ADVQAAKDDAARANQR	AEDSPEIKDYR	AESGALSTGEAIGTGMSILVMVVQSWEEESRR
ADVTEALLAQDDTLDAAEIQDILASVEK	AEEAAEM*AISSPLLEDIDLSGAR	AESKGEFAENDAYVHATPVIR
ADWAMTSLK	AEEAAEMAISSPLLEDIDLSGAR	AESMSQEESQQLFAAIVR
ADWLSQPEPGWQPKPLDDVR	AEEEPATPPAPTTEEILLAEIR	AETAASSSQQLPSLAPMLEK
ADWQIAAIMNIGQHAK	AEEIQATDPER	AETATDKDYLNIEAVIGHEYFHNWTGNR
ADYIWFNGEMVPWAEAK	AEEKPAAPAQVAAPAASAAK	AETFGFDVIVDR
ADYPFTTLIPSLGVVR	AEELMEEFHINHLR	AETFTLPIFDLAVPMALPGVNPDILDPR
ADYVSITDDEALDAFK	AEEM*TVITGSLK	AETGFGVMDEQQLK
AEAAELEVDELKSQLADYQQALDVQQTR	AEEMTVITGSLK	AETLYYIVK
AEAAPAAAGGGLPGILPWPK	AEFADQIATILQQAHALPK	AETPAADTTINAAPEALTLGFSEGIELNFSGVK
AEAAVVGVPHNIK	AEFGEVDILVNNAGITR	AETQDISANTQDINAGTQDIGAIQPYR
AEAAWQVNER	AEFQIIIDPTHQGK	AEVM*DVANAVLDGTDAVM*LSAETAAGQYPAETVAAM*AR
AEAFSQDPDFYAFIR	AEGDGEGFIVIDDLVDTGGTATAIR	AEVM*DVANAVLDGTDAVM*LSAETAAGQYPAETVAAMAR
AEAGDVANAILDGTDAVM*LSGESAK	AEGDILLDGQNILTDKQDIALLR	AEVM*DVANAVLDGTDAVMLSAETAAGQYPAETVAAM*AR
AEAGDVANAILDGTDAVMLSGESAK	AEGDQLHSR	AEVMDVANAVLDGTDAVM*LSAETAAGQYPAETVAAMAR
AEAGIVISASHNPFYDNGIK	AEGDSALR	AEVMDVANAVLDGTDAVMLSAETAAGQYPAETVAAMAR
AEAHINNSHGDVDYAQASAELAK	AEGEVEGVEQR	AEVPEGPHVVTSGTASVEATPDIATIAIEVSVSAK
AEAIHYIGDLVQR	AEGFSDKHHALFLGR	AEVRPQVSGIILKR
AEAIVYTALETLAQR	AEGHEFYTLGGLDVSPDNQLLAVAEDYLSR	AEVSPVAIR
AEALDSYIPQPER	AEGHEFYTLGGLDVSPDNQLLAVAEDYLSRR	AEVTGSGKKPWR
AEAMPLMENWLQK	AEGQALGVNAWQVGPTTAD	AEVYASDDAK
AEANKAFAHYR	AEGQALGVNAWQVGPTTADPAEQVR	AEVYASDDAKEK
AEAPKTDSFYLPK	AEGQNVEFEIQDGQK	AEWAKPWLALCQQCDPLAPANENQLAAIAQAYTDYLVR
AEAPLGIVYGSDAVASK	AEGYFDGYDR	AEWDKDAYTAVVK
AEAQVIIEQASK	AEGYFDGYDRK	AEWNGEYVSPYAEHGKK
AEAQVIIEQASKR	AEHSNNELLDTVVGYR	AEYTGWDGHLSR
AEAVATDEAMDDIILASDVVMVAR	AEIADHLGLSAPGDR	AEYTPHVDTGDYIIVLNAEK
AEAVTSAIMQAK	AEIEGEIGDSHM*GLAAR	AEYVLSQKPEVIFLAGGDWPK
AEDDLAAALTENGIPFDYQPGEGAFYGPK	AEIEGEIGDSHMGLAAR	AFAAEPQLAEIYEADEEVR
AEDEAINVFAR	AEIGGIVHTHSR	AFAAYLQQGLGLQK
AEDFGQGSVSSLLLHEALNER	AEIGTLPVGSK	AFAEIGGIVHTHSR
AEDIPLLANHLLR	AEIIAHGR	AFAEQWLGK
AEDKGTLVVNKPQSLR	AEIIAHGRGEK	AFAEQWLGKK
AEDLSAHLM*R	AEILSSFER	AFAHGLKPIVVINK
AEDLSAHLMR	AEKELIVATDTAFVPFEFK	AFALPNWWYLPVDAQLPSDR
AEDSPEIKDYR	AEKEPVLTHYAVAK	AFASDNATVVIGTSLDPEM*NDELR
AEDTLALLRK	AEKIDNEEVLIM*SESDILAIVEA	AFASDNATVVIGTSLDPEMNDELR
AEDYLGEPVTEAVITVPAYFNDAQR	AEKIDNEEVLIMSESDILAIVEA	AFCEPGQDAILFCPPTYGMYAVSAETFGVER
AEEAAEM*AISSPLLEDIDLSGAR	AEKLPQVAKPLTFASEEEIR	AFDHGITHFDLANNYGPPPGSAELNFGR
AEEAAEMAISSPLLEDIDLSGAR	AEKPAVAFTPEQEAR	AFDTLKDDSLPLDSLLAAISR
AEEAGVDLVEISPNAEPPVCR	AELAAHEMIKPVAQR	AFEEHAFDYLLKPLDHQR
AEEEPATPPAPTTEEILLAEIR	AELDAETAPK	AFEELEFNNKR
AEEIIYGPEK	AELDKLQNEIR	AFEGAVIAYEPIWAIGTGK
AEEIQATDPER	AELDKLR	AFEHTAAYDSMIANYFGTLVPPYHGDTEQPSGHFPR
AEEKPAAPAQVAAPAASAAK	AELDTALVTDSGENEDGL	AFEQSQPVIIR
AEELMEEFHINHLR	AELGFDDLLSKLDAALQQSGGELLAQSIR	AFEVALDNVRPTVEVK
AEEM*TVITGSLK	AELGIPASIR	AFGADVVINPLKEDADKIVK
AEEMTVITGSLK	AELHLATVTLGR	AFGEEVINAALAEK
AEFADQIATILQQAHALPK	AELIAAAMR	AFGGASVIYLFGDLGAGK
AEFGEVDILVNNAGITR	AELLYGAIDR	AFGIDVGHENYQIFHIK
AEFQIIIDPTHQGK	AELVEQFKLPIEK	AFIAPLTLQAVSGYPVSDDLLDPAAEAAMGHIELGK
AEFTQLVR	AEM*ADPQLAQR	AFIDYLQNTVM*R
AEGDGEGFIVIDDLVDTGGTATAIR	AEM*HYIVR	AFIDYLQNTVMR
AEGDILLDGQNILTDK	AEM*PGPLKDNK	AFLAIYDLSYDMTTLLSPDER
AEGDILLDGQNILTDKQDIALLR	AEM*SEHLFEK	AFLDELENLSQQPISM*DVPDQLK
AEGDSALR	AEMMAVLAHAGMTR	AFLDELENLSQQPISMDVPDQLK
AEGFSDKHHALFLGR	AEMNIAPGKPLEVMLR	AFLEFAAEDLGADYIATGHYVR
AEGHEFYTLGGLDVSPDNQLLAVAEDYLSR	AEMSEHLFEK	AFLESIGSDQAK
AEGHEFYTLGGLDVSPDNQLLAVAEDYLSRR	AEMSPPISAGQR	AFLGLPIGTIR
AEGLSNVITLSTLR	AENHLPIEDR	AFLMALPK
AEGQNVEFEIQDGQK	AENKYGLLAK	AFLNDKLDLAQAEAIADLIDASSEQAAR
AEGYFDGYDR	AENNFQIDIK	AFLPDAAFPDTLR
AEGYFDGYDRK	AENNFQIDIKDFENK	AFLPGSLVDVRPVR
AEHGIVFGEPK	AENQYYGTGR	AFLPGSLVDVRPVRDTLHLEGK
AEHSNNELLDTVVGYR	AENSQEPIKEHLLLTR	AFLPGSLVDVRPVRDTLHLEGKELEFK
AEIADHLGLSAPGDR	AEPDTSALAELAQTLLAPR	AFNDFFAR
AEIEGEIGDSHM*GLAAR	AEPLNITTDLPGR	AFNEALPLTGVVLTK
AEIEGEIGDSHMGLAAR	AEPSFIPEVIDSMLR	AFNEM*QPIVDR
AEIGTLPVGSK	AEPVIDAEQDNGDALPVINPAEPADVVGYVR	AFNEMQPIVDR
AEIIAHGR	AEQAALQADKR	AFNPWPVSYFIVDEQPIK
AEIIAHGRGEK	AEQGKLDPVIGR	AFPVENNIELETGYLNAR
AEKELIVATDTAFVPFEFK	AEQGKLDPVIGRDEEIRR	AFQADLTAFITNGEDHFVPWWVTLAR
AEKIDNEEVLIM*SESDILAIVEA	AEQIIAEQVPIAPIYQFTNGR	AFQMHFRPQDFSGVPDVETEAIALALVEK
AEKIDNEEVLIMSESDILAIVEA	AERGIATCVLLGNPEEIQR	AFQQGDEAELVQQLR
AEKKHEIAVVAK	AESAGIPHHALDAK	AFQSVSKADDSLNK
AELAAHEM*IKPVAQR	AESALKDTR	AFQVLLNEETK
AELAAHEMIKPVAQR	AESFQAVADAVVDYHQSGPVEYIEFPEK	AFSDTGFVLPIEVQAMSALVLQQR
AELAGPALQELLNNGLQR	AESKGEFAENDAYVHATPVIR	AFSGEGAVADNASVGSR
AELDAETAPK	AETAASSSQQLPSLAPMLEK	AFSGIVAGNVK
AELDKLQNEIR	AETATDKDYLNIEAVIGHEYFHNWTGNR	AFSQFLNLTNTAEQYHSISPHGEAASNPEALAQLFTR
AELDKLR	AETFGFDVIVDR	AFSYYDEDKNNWVLEPGLFTLR
AELDTALVTDSGENEDGL	AETFGFDVIVDRAEK	AFTFLDAALAR
AELGFDDLLSKLDAALQQSGGELLAQSIR	AETFTLPIFDLAVPMALPGVNPDILDPR	AFTGVGGIPLFIER
AELGIPASIR	AETGFGVMDEQQLK	AFTLPM*IFPDWTVQ
AELHLATVTLGR	AETQDISANTQDINAGTQDIGAIQPYR	AFTLPMIFPDWTVQ
AELIAAAMR	AEVAGEYLR	AFTNYLPGFNIPMLPR
AELLYGAIDR	AEVEKNHELQR	AFTSEEFTHFLE
AELPLQLAVPR	AEVILPNQIQVLHANFPTERPIPHWAK	AFTSEEFTHFLEDLTK
AEM*PGPLKDNK	AEVLQLAHLLDR	AFTTNDLAAAIGGVR
AEM*SEHLFEK	AEVM*DVANAVLDGTDAVM*LSAETAAGQYPAETVAAM*AR	AFTTQLTVLLM*LVGR
AEMELFAAQAAEVDIIVTTALIPGRPAPR	AEVM*DVANAVLDGTDAVMLSAETAAGQYPAETVAAM*AR	AFTTQLTVLLMLVGR
AEMGLNKEDYWWYR	AEVM*DVANAVLDGTDAVMLSAETAAGQYPAETVAAMAR	AFTVPATPVQGEITR
AEMMAVLAHAGMTR	AEVMDVANAVLDGTDAVMLSAETAAGQYPAETVAAM*AR	AFVEVGQK
AEMNIAPGKPLEVMLR	AEVMDVANAVLDGTDAVMLSAETAAGQYPAETVAAMAR	AFVEYLNK
AEMSEHLFEK	AEVPEGPHVVTSGTASVEATPDIATIAIEVSVSAK	AFVWDNPSAPPSEVTLLR
AENEDGNHDSFTR	AEVSPVAIR	AFVYALATAGEAGVINLLTLIEQEM*R
AENHLPIEDR	AEVTGSGKKPWR	AFVYALATAGEAGVINLLTLIEQEMR
AENKYGLLAK	AEVYASDDAK	AFWNVVNWDEAAAR
AENNFQIDIK	AEWDKDAYTAVVK	AFYEWLIDNQLTPHLVVDVTRPGVSVPMEFAR
AENNFQIDIKDFENK	AEWNGEYVSPYAEHGKK	AFYLASTGRPGPVVIDLPK
AENNFQIDIKDFENKITEK	AEYSPDFFGDVLYR	AFYLASTGRPGPVVIDLPKDIVGPAVK
AENPQQVLGFLNDLAK	AEYTPHVDTGDYIIVLNAEK	AFYQEFNTSPAIR
AENQYYGTGR	AEYVLSQKPEVIFLAGGDWPK	AGAANAALLAAQILALHDTELAGR
AENSQEPIKEHLLLTR	AFAAYLQQGLGLQK	AGADGVLTYFAK
AEPDTSALAELAQTLLAPR	AFAEIGGIVHTHSR	AGADRVELCCGQSEGGLTPSVGALMQAR
AEPLNITTDLPGR	AFAEQGIAELSK	AGAERKYR
AEPSFIPEVIDSMLR	AFAEQWLGK	AGAEVLFFAPDKPQLHVINHITGEIVAEER
AEPVIDAEQDNGDALPVINPAEPADVVGYVR	AFAEQWLGKK	AGAIWFATPPAER
AEQEGIAEDGYR	AFAHGLKPIVVINK	AGALIAPIQIVEER
AEQGKLDPVIGR	AFAHGLKPIVVINKVDR	AGAPFGPGANPM*HGR
AEQGKLDPVIGRDEEIRR	AFALPNWWYLPVDAQLPSDR	AGAPFGPGANPMHGR
AEQIIAEQVPIAPIYQFTNGR	AFASDNATVVIGTSLDPEM*NDELR	AGAQSVMIFDTWGGVLTGR
AEQLIAQGIITDGM*VV	AFASDNATVVIGTSLDPEMNDELR	AGATYITFHPEASEHVDR
AESAGIPHHALDAK	AFDTLKDDSLPLDSLLAAISR	AGAWYSYNGDKIGQGK
AESALKDTR	AFDTRPEVK	AGCKTRNTSGRSFSHCAISSPR
AESFQAVADAVVDYHQSGPVEYIEFPEK	AFEEHAFDYLLKPLDHQR	AGDDAARPEWLEAEFGIR
AESGALSTGEAIGTGMSILVMVVQSWEEESRR	AFEELEFNNKR	AGDEGKLFGSIGTR
AESKGEFAENDAYVHATPVIR	AFEGAVIAYEPIWAIGTGK	AGDIIVSMNGK
AETAASSSQQLPSLAPMLEK	AFEHTAAYDSMIANYFGTLVPPYHGDTEQPSGHFPR	AGDIVGEHTAMFADIGER
AETATDKDYLNIEAVIGHEYFHNWTGNR	AFEQQALENMLDVLHK	AGDIVLTGTPQGVGPMQSGDMLK
AETFGFDVIVDR	AFEVALDNVRPTVEVK	AGDKDAAQK
AETFGFDVIVDRAEK	AFFTELLNAGVK	AGDLTVSAVLSGNR
AETGFGVMDEQQLK	AFGADVVINPLKEDADKIVK	AGDM*VIDGSVR
AETLYYIVK	AFGEEVINAALAEK	AGDMVIDGSVR
AEVADPTLTVLSIHPGWVK	AFGGEVLLFGANFDEAK	AGDNAPM*AYIELVDR
AEVAGEYLR	AFGIDVGHENYQIFHIK	AGDNAPMAYIELVDR
AEVEKNHELQR	AFIAPLTLQAVSGYPVSDDLLDPAAEAAMGHIELGK	AGDQIQSGVDAAIK
AEVLQLAHLLDR	AFIAQEPLLTDK	AGEATDKTIASLTPHLDKGDILIDGGNTYYK
AEVM*DVANAVLDGTDAVM*LSAETAAGQYPAETVAAM*AR	AFIDYLQNTVM*R	AGEEFTIDVNFPEDYHAENLK
AEVM*DVANAVLDGTDAVMLSAETAAGQYPAETVAAM*AR	AFIDYLQNTVMR	AGEEFTIDVNFPEDYHAENLKGK
AEVMDVANAVLDGTDAVMLSAETAAGQYPAETVAAMAR	AFLAIYDLSYDMTTLLSPDER	AGEEIALQVLAQELPK
AEVPPGTVLAEKQEIVR	AFLASTFHYLLSHPAEEGR	AGEGSFGYNAYTEEYGDM*IAM*
AEVSPVAIR	AFLDELENLSQQPISM*DVPDQLK	AGEGSFGYNAYTEEYGDM*IAM*GILDPTK
AEVTGSGKKPWR	AFLDELENLSQQPISMDVPDQLK	AGEGSFGYNAYTEEYGDM*IAMGILDPTK
AEVYASDDAK	AFLESIGSDQAK	AGEGSFGYNAYTEEYGDMIAM
AEWAKPWLALCQQCDPLAPANENQLAAIAQAYTDYLVR	AFLGLPIGTIR	AGEGSFGYNAYTEEYGDMIAM*
AEWDKDAYTAVVK	AFLLPALQHLLDFPR	AGEGSFGYNAYTEEYGDMIAM*GILDPTK
AEWNGEYVSPYAEHGKK	AFLMALPK	AGEGSFGYNAYTEEYGDMIAMGILD
AEYTPHVDTGDYIIVLNAEK	AFLNDKLDLAQAEAIADLIDASSEQAAR	AGEGSFGYNAYTEEYGDMIAMGILDPTK
AEYVLSQKPEVIFLAGGDWPK	AFLPDAAFPDTLR	AGEGSFGYNAYTEEYGDMIAMGILDPTKVTR
AFAAYLQQGLGLQK	AFLPGSLVDVRPVR	AGEGWGLEQSWAFWQGFR
AFAEIGGIVHTHSR	AFLPGSLVDVRPVRDTLHLEGK	AGEISALAHTR
AFAENMPIDILR	AFLPGSLVDVRPVRDTLHLEGKELEFK	AGELIADIAQQVGGK
AFAEQGIAELSK	AFNEALPLTGVVLTK	AGELLLGVGIPVEQHYGLMSEIAPGWK
AFAEQWLGK	AFNEM*QPIVDR	AGELSPPDQVLVLGLWDR
AFAEQWLGKK	AFNEMQPIVDR	AGELSQVPEAIQR
AFAHGLKPIVVINK	AFNIDAQR	AGELSWQSLQETLVLQGELDRETLLPLWQQR
AFAKDNAKFEVK	AFNPWPVSYFIVDEQPIK	AGEPHVLLTTSAGNIELELNSQK
AFALPNWWYLPVDAQLPSDR	AFPVENNIELETGYLNAR	AGERLPQADWGYDMR
AFASDNATVVIGTSLDPEM*NDELR	AFQAAAVPDEMVAVFPVINDISLSDYQFLLK	AGESASVSVEKRPSGVK
AFASDNATVVIGTSLDPEMNDELR	AFQMHFRPQDFSGVPDVETEAIALALVEK	AGEWPNGSLPLSSK
AFCEPGQDAILFCPPTYGMYAVSAETFGVER	AFQQGDEAELVQQLR	AGEWQESIGDDWFGVDVHHK
AFEDAVVDTLAIK	AFQVLLNEETK	AGFDAVDVHMSDLLAGR
AFEELEFNNKR	AFQVLLNEETKNLQR	AGFDEVYHR
AFEGAVIAYEPIWAIGTGK	AFSDTGFVLPIEVQAM	AGFEANGNIK
AFEHTAAYDSMIANYFGTLVPPYHGDTEQPSGHFPR	AFSDTGFVLPIEVQAM*	AGFLAAIAK
AFEVALDNVRPTVEVK	AFSDTGFVLPIEVQAM*SALVLQQR	AGFLAAIAKGEAHSPLITAEK
AFGEEVINAALAEK	AFSDTGFVLPIEVQAMSALVLQQR	AGFPDLLVDTLLATEDR
AFGEEVINAALAEKIADIDVLK	AFSGEGAVADNASVGSR	AGFQPLNIAPLHDIHPIR
AFGIDVGHENYQIFHIK	AFSGIVAGNVK	AGFTITDINPDFVIVGETR
AFIAPLTLQAVSGYPVSDDLLDPAAEAAMGHIELGK	AFSQFLNLTNTAEQYHSISPHGEAASNPEALAQLFTR	AGFTPDELFIR
AFIAQEPLLTDK	AFSYYDEDKNNWVLEPGLFTLR	AGFTPDELFIRDAETLQPLTVDSQQAVILMAAWLGK
AFIDYLQNTVMR	AFTGVGGIPLFIER	AGGAITAGCFLSR
AFLAIYDLSYDMTTLLSPDER	AFTITSTTGNNLMHGSAVIYK	AGGAPTFAVGMAHIISEIFNSR
AFLASTFHYLLSHPAEEGR	AFTLPMIFPDWTVQ	AGGDNYSDHPMPLGGGGAR
AFLDELENLSQQPISM*DVPDQLK	AFTNYLPGFNIPMLPR	AGGELMIVGNR
AFLDELENLSQQPISMDVPDQLK	AFTSEEFTHFLEDLTK	AGGFIQIEAEPHTVK
AFLESIGSDQAK	AFTTNDLAAAIGGVR	AGGGGMVVVEELEHALAR
AFLGLPIGTIR	AFTTNFENLYGLK	AGGGSATLSM*GQAAAR
AFLMALPK	AFTVPATPVQGEITR	AGGGSATLSMGQAAAR
AFLNDKLDLAQAEAIADLIDASSEQAAR	AFVEVGQK	AGGIVLTGTAAGK
AFLPDAAFPDTLR	AFVEYLNK	AGGKHNDLENVGYTAR
AFLPGSLVDVRPVR	AFVFFDSFREDPQANPLQTPSGK	AGGNYLSSLLVGSEAR
AFLPGSLVDVRPVRDTLHLEGK	AFVWDNPSAPPSEVTLLR	AGGPALLFENPK
AFLPGSLVDVRPVRDTLHLEGKELEFK	AFVYALATAGEAGVINLLTLIEQEMR	AGGPLYLYR
AFNEALPLTGVVLTK	AFWNVVNWDEAAAR	AGGQDKPHVR
AFNEM*QPIVDR	AFYLASTGRPGPVVIDLPK	AGGREDDWQSDLVYWGAGNK
AFNEMQPIVDR	AFYLASTGRPGPVVIDLPKDIVGPAVK	AGGVIGILGELDR
AFNPWPVSYFIVDEQPIK	AFYQEFNTSPAIR	AGHFMPESLLK
AFNQMAAGVK	AGAANAALLAAQILALHDTELAGR	AGHTFNLLDAR
AFPVENNIELETGYLNAR	AGADGVLTYFAK	AGIAEIITAMVR
AFQAAAVPDEM*VAVFPVINDISLSDYQFLLK	AGADRVELCCGQSEGGVTPSVGALMQAR	AGIALNDNFVK
AFQAAAVPDEMVAVFPVINDISLSDYQFLLK	AGAEVLFFAPDKPQLHVINHITGEIVAEER	AGIALPILNPESAILIQLSAVN
AFQADLTAFITNGEDHFVPWWVTLAR	AGAIWFATPPAER	AGIDGALSGDYTALILDIMLPDMSGIDVLR
AFQMHFRPQDFSGVPDVETEAIALALVEK	AGALIAPIQIVEER	AGIDPVSLIAFDK
AFQQGDEAELVQQLR	AGAPFGPGANPM*HGR	AGIEHGLLYNQEQR
AFQVLLNEETK	AGAPFGPGANPMHGR	AGIEQAISR
AFQVLLNEETKNLQR	AGAQSVMIFDTWGGVLTGR	AGIGIDELLNAILL
AFRDYLRPDIGEILIDNPK	AGASLIQIYSGFIFR	AGIGIDELLNAILLQAEVLELK
AFSDTGFVLPIEVQAM*	AGATFGEDDFR	AGIIEEAETEVAEIQEQFQSGLVTAGER
AFSDTGFVLPIEVQAMSALVLQQR	AGATYITFHPEASEHVDR	AGIIEFAQALSQR
AFSELKGKR	AGAWYSYNGDK	AGIKPGDVLISVDGK
AFSGEGAVADNASVGSR	AGAWYSYNGDKIGQGK	AGILAQVPANR
AFSQFASDLDDATR	AGCKTRNTSGRSFSHCAISSPR	AGINSDEIAGIGITNQR
AFSQFLNLTNTAEQYHSISPHGEAASNPEALAQLFTR	AGDDAARPEWLEAEFGIR	AGIQSQERPLGIFLLAGSTGTGK
AFSYYDEDKNNWVLEPGLFTLR	AGDEGKLFGSIGTR	AGIRPAVNPGISVSR
AFTGVGGIPLFIER	AGDETLNNFLNYTPSSTGGSGALTQKVK	AGISGEDYDAALNSFVVK
AFTITSTTGNNLMHGSAVIYK	AGDGTTTATVLAQSIITEGLK	AGITLADLTLIDM*HEAFAAQTLANLK
AFTKDFLAR	AGDIIVSM*NGK	AGITLADLTLIDMHEAFAAQTLANLK
AFTLPM*IFPDWTVQ	AGDIIVSMNGK	AGITLTLFHGR
AFTLPMIFPDWTVQ	AGDIVLTGTPQGVGPMQSGDMLK	AGITPYITQEVGEAMTIIGLVSSGLGVSILPASFR
AFTNYLPGFNIPMLPR	AGDKDAAQK	AGIVHRLDKDTTGLMVVAK
AFTSEEFTHFLEDLTK	AGDLAAMLTNLEPHDVLFIDEIHR	AGIYTTVQDAGR
AFTTNDLAAAIGGVR	AGDLLAEIDPRPYEVQLTQAQGQLAK	AGKFDISIGDQQIGVK
AFTTQLTVLLM*LVGR	AGDLTVSAVLSGNR	AGKPLLIIAEDVEGEALATLVVNTM*R
AFTVPATPVQGEITR	AGDM*VIDGSVR	AGKPLLIIAEDVEGEALATLVVNTMR
AFVEVGQK	AGDMVIDGSVR	AGKPVELPLYSYTEHTR
AFVEYLNKNKNPIHPK	AGDNAPM*AYIELVDR	AGLADAICDLVSTGATLEANGLR
AFVWDNPSAPPSEVTLLR	AGDNAPMAYIELVDR	AGLASLHAR
AFVYALATAGEAGVINLLTLIEQEMR	AGDPPSISLSQR	AGLGMMEGVLENVPSAR
AFWNVVNWDEAAAR	AGDQIQSGVDAAIK	AGLIASPWELGNVA
AFYEWLIDNQLTPHLVVDVTRPGVSVPMEFAR	AGDTAPVLDYLQEESK	AGLIASPWELGNVAS
AFYLASTGRPGPVVIDLPKDIVGPAVK	AGDVAVVESITKPGAEIHDYQPTPR	AGLIASPWELGNVASMLER
AFYQEFNTSPAIR	AGEATDKTIASLTPHLDKGDILIDGGNTYYK	AGLKGDNEDQNVGIK
AGAANAALLAAQILALHDTELAGR	AGEEASVIANK	AGLLANQLYSQVK
AGADGVLTYFAK	AGEEFTIDVNFPEDYHAENLK	AGLMPADQGIAQHLR
AGAERKYR	AGEEIALQVLAQELPK	AGLNAAQVGDSNYR
AGAEVLFFAPDKPQLHVINHITGEIVAEER	AGEGSFGYNAYTEEYGDM*IAM*	AGLPHSQQLR
AGAIWFATPPAER	AGEGSFGYNAYTEEYGDM*IAM*GILD	AGLPLSLTLQSK
AGALIAPIQIVEER	AGEGSFGYNAYTEEYGDM*IAM*GILDPTK	AGLSDPNRPIGSFLFLGPTGVGK
AGAPFGPGANPM*HGR	AGEGSFGYNAYTEEYGDM*IAMGILDPTK	AGLVDFAELLLR
AGAPFGPGANPMHGR	AGEGSFGYNAYTEEYGDMIAM*GILDPTK	AGLVDILGASGVSNIQGEDQMK
AGASLIQIYSGFIFR	AGEGSFGYNAYTEEYGDMIAMGILDPTK	AGLVDILGASGVSNIQGEDQMKLDLFANEK
AGATFGEDDFR	AGEGWGLEQSWAFWQGFR	AGLVFNPATPLSYLDYVM*DKLDVILLM*SVNPGFGGQSFIPETLNK
AGATYITFHPEASEHVDR	AGEHEVHFQVHSDVFAK	AGLVFNPATPLSYLDYVMDK
AGAYVQIVAR	AGEISALAHTR	AGLVFNPATPLSYLDYVMDKLDVILLMSVNPGFGGQSFIPETLNK
AGDDAARPEWLEAEFGIR	AGELIADIAQQVGGK	AGLVGFSVSNLR
AGDEGKLFGSIGTR	AGELLLGVGIPVEQHYGLMSEIAPGWK	AGM*DSHGFGMASVR
AGDGTTTATVLAQSIITEGLK	AGELSPPDQVLVLGLWDR	AGM*GASPDGVAK
AGDIIVSM*NGK	AGELSQVPEAIQR	AGM*SVDGVFNLTNVDR
AGDIIVSMNGK	AGELSWQSLQETLVLQGELDRETLLPLWQQR	AGMAVGLAGLFIEAHPEPNSAK
AGDIVLTGTPQGVGPMQSGDMLK	AGEPHAEVHALR	AGMDSHGFGM*ASVR
AGDKDAAQK	AGEPHVLLTTSAGNIELELNSQK	AGMDSHGFGMASVR
AGDLAAMLTNLEPHDVLFIDEIHR	AGETLGIVGESGSGK	AGMGASPDGVAK
AGDMVIDGSVR	AGETNETSVPTGLVYPPDIFSLSHVALPFPMSDSLYGR	AGMSVDGVFNLTNVDR
AGDNAPM*AYIELVDR	AGEVIVTGLR	AGMSVDGVFNLTNVDRWFLVQIEELVR
AGDNAPMAYIELVDR	AGFAGGTADAFTLFELFER	AGMVAGVIVNR
AGDPPSISLSQR	AGFATTQEAYDEAVGTLFSALDR	AGMVQGLLQEFS
AGDQIQSGVDAAIK	AGFDAVDVHMSDLLAGR	AGNALFVINPATLVQYPLNDIATEQM*K
AGDRLIISGLQK	AGFDEVYHR	AGNALFVINPATLVQYPLNDIATEQMK
AGDTAPVLDYLQEESK	AGFLAAIAK	AGNDAPDQTTTIIR
AGEATDKTIASLTPHLDKGDILIDGGNTYYK	AGFLAAIAKGEAHSPLITAEK	AGNEASRQELLTTLQNLSNDELLPVAR
AGEEASVIANK	AGFPDLLVDTLLATEDR	AGNKGAEAALTALEMINVIK
AGEEFTIDVNFPEDYHAENLK	AGFQPLNIAPLHDIHPIR	AGNTLPM*R
AGEGSFGYNAYTEEYGDM*IAM*	AGFTITDINPDFVIVGETR	AGNTLPMR
AGEGSFGYNAYTEEYGDM*IAM*GILDPTK	AGFVATSIAEYFR	AGNVIGGGDWALDR
AGEGSFGYNAYTEEYGDM*IAMGILDPTK	AGFYVNR	AGPAILNTLLTAINER
AGEGSFGYNAYTEEYGDMIAM*GILDPTK	AGGAPTFAVGMAHIISEIFNSR	AGPILLEFPLLNK
AGEGSFGYNAYTEEYGDMIAMGILDPTK	AGGELMIVGNR	AGPLLSAELEALGK
AGEGSFGYNAYTEEYGDMIAMGILDPTKVTR	AGGFIQIEAEPHTVK	AGPLQSGQVDDWLQIAGWAGR
AGEGVFLAFQYPVEIPGVSNHFLLQTSVNAVR	AGGGSATLSM*GQA	AGQANLLDKDGQIISGGK
AGEGWGLEQSWAFWQGFR	AGGGSATLSM*GQAAAR	AGQEHLVAK
AGEHEVHFQVHSDVFAK	AGGGSATLSMGQAAAR	AGQILPQNNDFSR
AGEISALAHTR	AGGIVLTGTAAGK	AGQISLVTHALK
AGELIADIAQQVGGK	AGGKHNDLENVGYTAR	AGQIVNFDVHEGPK
AGELLLGVGIPVEQHYGLMSEIAPGWK	AGGLLNWLSASTLIIGAR	AGQPAQQSDLINVAQLTSQYYVLQPDPEDPAHAVK
AGELSPPDQVLVLGLWDR	AGGNYLSSLLVGSEAR	AGQSIGIVGSSLGGYF
AGELSQVPEAIQR	AGGPALLFENPK	AGQSIIVMGVSGSGK
AGELSWQSLQETLVLQGELDRETLLPLWQQR	AGGPLYLYR	AGQYAYR
AGEPHAEVHALR	AGGREDDWQSDLVYWGAGNK	AGRPASASPAVGYLSVHQK
AGEPHVLLTTSAGNIELELNSQK	AGGRIPLIVGR	AGSATRPFFGVQPALVDNLGNPQEGVAEGNLVITDSWPGQAR
AGESPSDALLR	AGGVAVIK	AGSGALTLGQPNSPGVPADFAK
AGETLGIVGESGSGK	AGGVIGILGELDR	AGTADAPENTFPAISK
AGETNETSVPTGLVYPPDIFSLSHVALPFPMSDSLYGR	AGHFMPESLLK	AGTATVRPNAGSDDVLGNGSFK
AGEVIVTGLR	AGHIHPDTR	AGTEIGVASTK
AGFAGGTADAFTLFELFER	AGHTFNLLDAR	AGTGGDEAAIFAGDMFR
AGFATTQEAYDEAVGTLFSALDR	AGHTFNLLDARK	AGTHDSHGAPLGEAEVAATR
AGFDAVDVHMSDLLAGR	AGHTGWLLYGR	AGTIPVHLYYQR
AGFDEVYHR	AGIALNDNFVK	AGTPEKVDLNPIGTGPFQLQQYQK
AGFEANGNIK	AGIALPILNPESAILIQLSAVN	AGTPVFGGMFDVVGAALTSGLHDSR
AGFLAAIAK	AGIAMGLVK	AGVAPSMVEQAR
AGFLAAIAKGEAHSPLITAEK	AGIDGALSGDYTALILDIMLPDMSGIDVLR	AGVDETSLTLPLVITEDR
AGFLNIVGGCCGTTPR	AGIDPVSLIAFDK	AGVELAFETMVDSGIIEESAYYESLHELPLIANTIAR
AGFPDLLVDTLLATEDR	AGIEHGLLYNQEQR	AGVIAFNLGQHHAYDVGSFLDQYGIAIR
AGFPGSITTIR	AGIEQAISR	AGVLAEVR
AGFQPLNIAPLHDIHPIR	AGIGIDELLNAILLQAEVLELK	AGVLESSFVAEVK
AGFTITDINPDFVIVGETR	AGIGIIQIDEPALR	AGVLTNTPGQLN
AGGAGAPELADGLANLQDR	AGIIEEAETEVAEIQEQFQSGLVTAGER	AGVLTNTPGQLNNN
AGGAPTFAVGMAHIISEIFNSR	AGIIEFAQALSQR	AGVLTNTPGQLNNNFF
AGGELMIVGNR	AGIKDWQTR	AGVLTNTPGQLNNNFFVN
AGGFAEGTACLR	AGIKESDVLLM*IQEFLNAGFK	AGVLTNTPGQLNNNFFVNLLD
AGGFIQIEAEPHTVK	AGIKESDVLLMIQEFLNAGFK	AGVLTNTPGQLNNNFFVNLLDM*STK
AGGGSATLSM*GQ	AGIKPGDVLISVDGK	AGVLTNTPGQLNNNFFVNLLDMSTK
AGGGSATLSM*GQA	AGIKPGDVLISVDGKK	AGVPGIPANSTLIFDVELLDVK
AGGGSATLSM*GQAA	AGILAQVPANR	AGVPLGVM*LHHTLR
AGGGSATLSM*GQAAAR	AGILTGQSQLY	AGVPLGVMLHHTLR
AGGGSATLSMGQA	AGILTGQSQLYDILR	AGVRPVVAEENLLAQPADGAISQLGAIR
AGGGSATLSMGQAAAR	AGILTGQSQLYDILRK	AGVSNLLDILSGVTGQSIPELEAQFTGQM*YGHLK
AGGIVLTGTAAGK	AGINSDEIAGIGITNQR	AGVSNLLDILSGVTGQSIPELEAQFTGQMYGHLK
AGGKHNDLENVGYTAR	AGIQSQERPLGIFLLAGSTGTGK	AGVTAQNIADAYHHAYQNKPLVR
AGGNYLSSLLVGSEAR	AGIRPAVNPGISVSR	AGVTGAENHGQLPLNHLVDK
AGGPALLFENPK	AGISGEDYDAALNSFVVK	AGVTGAENHGQLPLNHLVDKLR
AGGPLYLYR	AGITLADLTLIDM*HEAFAAQTLANLK	AGVYDKNKLFGITTLDTIR
AGGREDDWQSDLVYWGAGNK	AGITLADLTLIDMHEAFAAQTLANLK	AGWVEHDPMEIWATQSSTLIEVLAK
AGGRIPLIVGR	AGITLTLFHGR	AGYELLNLQTYFTAGVK
AGGVAVIK	AGIYTTVQDAGR	AGYLDSYIPEPER
AGGVIGILGELDR	AGKFDISIGDQQIGVK	AGYSISIPFTPGR
AGGYLTDGTDLHNPDFAAIANAAGIK	AGKPLLIIAEDVEGEALAT	AGYSISIPFTPGRTDASQEETDVSSFAVLEPTADGFR
AGHFMPESLLK	AGKPLLIIAEDVEGEALATLVVNTM*R	AGYTIVTTSSHK
AGHRPVALVGGATGM*IGDPSFK	AGKPLLIIAEDVEGEALATLVVNTMR	AGYVPESVPLEHHMFGMMLGK
AGHTFNLLDAR	AGKPVELPLYSYTEHTR	AHAAFGGYK
AGHTFNLLDARK	AGLADAICDLVSTGATLEANGLR	AHADIQDAFYQVFDK
AGHTGWLLYGR	AGLASLHAR	AHDATVAVGTNQTGTNNR
AGIAEIITAMVR	AGLFFADHVTTVSPTYAK	AHELEATAFALFTK
AGIALNDNFVK	AGLFIEAHPEPNSAK	AHELM*ESSTHIGK
AGIALPILNPESAILIQLSAVN	AGLGMMEGVLENVPSAR	AHELMESSTHIGK
AGIAMGLVK	AGLIASPWELGNVA	AHEMLAAVGLAK
AGIDGALSGDYTALILDIMLPDMSGIDVLR	AGLIASPWELGNVAS	AHFGFSMPVLYTSR
AGIDPVSLIAFDK	AGLIASPWELGNVASM*LER	AHFINTIR
AGIEHGLLYNQEQR	AGLIASPWELGNVASMLER	AHFVTIFAK
AGIEHKVLNAK	AGLIFGAADMAADIGAASTWEPLALAR	AHFVTIFAKPAGR
AGIEQAISR	AGLKGDNEDQNVGIK	AHFYLRPHYQLE
AGIGIDELLNAILLQAEVLELK	AGLLANQLYSQVK	AHFYLRPHYQLEGM*TVSLR
AGIIEEAETEVAEIQEQFQSGLVTAGER	AGLM*PADQGIAQHLR	AHFYLRPHYQLEGMTVSLR
AGIIEFAQAL	AGLMLFNALVGRPEPR	AHGGEHIQIISK
AGIIEFAQALSQR	AGLMPADQGIAQHLR	AHHLDANLPQDFQILDSDDQLR
AGIKESDVLLM*IQEFLNAGFK	AGLPHSQQLR	AHHYPAELSGGQQQR
AGIKESDVLLMIQEFLNAGFK	AGLPLSLTLQSK	AHIEQMK
AGIKPGDVLISVDGK	AGLSDPNRPIGSFLFLGPTGVGK	AHIEQMKK
AGIKPGDVLISVDGKK	AGLVDFAELLLR	AHIFSIIIEELEK
AGILAQVPANR	AGLVDILGASGVSNIQGEDQMK	AHILEALAIALANIDPIIELIR
AGILTGQSQLY	AGLVFNPATPLSYLDYVM*DKLDVILLM*SVNPGFGGQSFIPETLNK	AHILEALAIALANIDPIIELIRR
AGILTGQSQLYDILR	AGLVFNPATPLSYLDYVMDK	AHIVELVR
AGILTGQSQLYDILRK	AGLVGFSVSNLR	AHLASIANIQLER
AGIQSQERPLGIFLLAGSTGTGK	AGM*DSHGFGM*ASVR	AHLGAGVITQR
AGIRPAVNPGISVSR	AGM*DSHGFGMASVR	AHLGALYHVPAGLR
AGISGEDYDAALNSFVVK	AGM*GASPDGVAK	AHLMEELKK
AGITLADLTLIDM*HEAFAAQTLANLK	AGMAVGLAGLFIEAHPEPNSAK	AHMPNILQWQR
AGITLADLTLIDMHEAFAAQTLANLK	AGMDSHGFGM*ASVR	AHNIVLSQQR
AGITLTLFHGR	AGMDSHGFGMASVR	AHNKTSVPVFGVDALPEALALVK
AGIVHRLDKDTTGLM*VVAK	AGMGASPDGVAK	AHNNPVTASVSAPVAPVTR
AGKFDISIGDQQIGVK	AGMHLQESLMEQGASR	AHPDVFNILLQVLDDGR
AGKPLLIIAEDVEGEALAT	AGMSVDGVFNLTNVDR	AHPDVFNILLQVLDDGRLTDGQGR
AGKPLLIIAEDVEGEALATLVVNTM*R	AGMSVDGVFNLTNVDRWFLVQIEELVR	AHPDVFNLLLQVMDNGTLTDNNGR
AGKPLLIIAEDVEGEALATLVVNTMR	AGMVAGVIVNR	AHPDVLNLFYQAFDKGELADGEGR
AGKPVELPLYSYTEHTR	AGMVQGLLQEFS	AHPNIPALLNPVFATLDGPTLQK
AGLADAICDLVSTGATLEANGLR	AGMVQGLLQEFSLS	AHQALLTDR
AGLAIFGPTQAAAQLEGSK	AGNALFVINPATLVQYPLNDIATEQM*K	AHQDNIDGTWQSLSQLTPQELNTMVINADENVLQGWLDLLR
AGLASLHAR	AGNALFVINPATLVQYPLNDIATEQMK	AHQNFM*SAVSK
AGLDFSIER	AGNDAPDQTTTIIR	AHQNFMSAVSK
AGLGFDIDGVVIK	AGNEASRQELLTTLQNLSNDELLPVAR	AHRPIIDELQER
AGLGHERQPVGSFLFAGPTGVGK	AGNKDAAAAVGK	AHSHANLGWETFTDR
AGLGIAVISTSK	AGNKGAEAALTALEMINVIK	AHSTIAQVVEQVQK
AGLGMMEGVLENVPSAR	AGNTLPM*R	AHSTIAQVVEQVQKR
AGLIASPWELGNVAS	AGNTLPMR	AHSVIAFK
AGLIASPWELGNVASMLER	AGPAILNTLLTAINER	AHTALPSILDYK
AGLIFGAADMAADIGAASTWEPLALAR	AGPILLEFPLLNK	AHVGDFIFTSK
AGLKGDNEDQNVGIK	AGPLLSAELEALGK	AHYVLLNVEAPQEAIDELETNFR
AGLLANQLYSQVK	AGPLQSGQVDDWLQIAGWAGR	AHYVLLNVEAPQEAIDELETNFRFNDAVIR
AGLMLFNALVGRPEPR	AGQANLLDKDGQIISGGK	AIAANIPVFIINAELNQSGLAK
AGLMPADQGIAQHLR	AGQDKVNPGSIILSAEMMLR	AIADIAAQNR
AGLNAAQVGDSNYR	AGQILPQNNDFSR	AIADLDKQPDSVSSVLK
AGLPHSQQLR	AGQIVNFDVHEGPK	AIADNAKPADLNRPGHVFPLR
AGLPLSLTLQSK	AGQPAQQSDLINVAQLTSQYYVLQPDAEDPAHAVK	AIAEATEAGLLGK
AGLSDPNRPIGSFLFLGPTGVGK	AGQSIGIVGSSLGGYF	AIAEGLEQGGVMHEIHVDEELR
AGLVAPDDTTFAYLK	AGQSIIVMGVSGSGK	AIAEGLEQGGVMHEIHVDEELRQQALIPLNR
AGLVDFAELLLR	AGQYAYR	AIAELLVER
AGLVDILGASGVSNIQGEDQMK	AGQYLMVVMDER	AIAESTDLPQILYNVPSR
AGLVFNPATPLSYLDYVM*DKLDVILLM*SVNPGFGGQSFIPETLNK	AGQYSTTITRPALFR	AIAGIQPNLLK
AGLVFNPATPLSYLDYVMDK	AGRIAGLEVKRIINEPTAAALAYGLDKEVGNR	AIAGLKGDNEDQNVGIK
AGLVFNPATPLSYLDYVMDKLDVILLMSVNPGFGGQSFIPETLNK	AGRPASASPAVGYLSVHQK	AIAGSYHAVVGLPLVETHELLSHFIAQR
AGLVGFSVSNLR	AGSAKPAAQHLLDLK	AIAGYGVALDLTLR
AGM*DSHGFGMASVR	AGSALPGM*PDDAVLR	AIAIEPEVLLLDEPTSALDPISTLTIEELITTLK
AGM*GASPDGVAK	AGSATRPFFGVQPALVDNLGNPQEGVAEGNLVITDSWPGQAR	AIAITINLFNPQK
AGMAVGLAGLFIEAHPEPNSAK	AGSGALTLGQPNSPGVPTDFAK	AIALDPELIMFDEPFVGQDPITMGVLVK
AGMDSHGFGMASVR	AGTADAPENTFPAISK	AIALQLVPEAQR
AGMGASPDGVAK	AGTATVRPNAGSDDVLGNGSFK	AIAMGWKPDMSHVHPTGK
AGMHLQESLMEQGASR	AGTEIGVASTK	AIAPHFAQHHNVTIR
AGMSVDGVFNLTNVDR	AGTGGDEAAIFAGDMFR	AIAQVGTISAN
AGMSVDGVFNLTNVDRWFLVQIEELVR	AGTHDSHGAPLGEAEVAATR	AIAQVGTISANSD
AGMVAGVIVNR	AGTPEKVDLNPIGTGPFQLQQYQK	AIAQVGTISANSDSTVGELIAQAM*EK
AGMVQGLLQEFS	AGTPVFGGMFDVVGAALTSGLHDSR	AIAQVGTISANSDSTVGELIAQAMEK
AGMVQGLLQEFSLS	AGVAPSMVEQAR	AIASDCADGM*TK
AGMVQGLLQEFSLSSQEGVALMCLAEALLR	AGVDETSLTLPLVVTEDR	AIASDCADGMTK
AGNALFVINPATLVQYPLNDIATEQM*K	AGVFYYAIK	AIDAIINQR
AGNALFVINPATLVQYPLNDIATEQMK	AGVGGTLGSLALIMGFGAMLGK	AIDGKLESLEIK
AGNDAPDQTTTIIR	AGVIAFNLGQHHAYDVGSFLDQYGIAIR	AIDGKLESLEIKK
AGNEASRQELLTTLQNLSNDELLPVAR	AGVIGFSK	AIDHEMKR
AGNKDAAAAVGK	AGVLAEVR	AIDHLLSELMEVR
AGNKGAEAALTALEMINVIK	AGVLTNTPGQLNNN	AIDKPFLLPIE
AGNTLPMR	AGVLTNTPGQLNNNF	AIDKPFLLPIEDVF
AGPAILNTLLTAINER	AGVLTNTPGQLNNNFF	AIDKPFLLPIEDVFSISGR
AGPGFINIFLDR	AGVLTNTPGQLNNNFFVN	AIDLIDEAGSSIR
AGPILLEFPLLNK	AGVLTNTPGQLNNNFFVNLLD	AIDMALAHQGLPAAGEALVSTWIGNGADVLVER
AGPLQSGQVDDWLQIAGWAGR	AGVLTNTPGQLNNNFFVNLLDM*STK	AIDRPFLLPIE
AGQDKVNPGSIILSAEMMLR	AGVLTNTPGQLNNNFFVNLLDMSTK	AIDRPFLLPIEDVFSISGR
AGQEHLVAK	AGVPGIPANSTLIFDVELLDVK	AIDSLSYTEAQK
AGQEIVSNASCTTNCLAPLAK	AGVPLGVM*LHHTLR	AIDVIDEAGAR
AGQIVNFDVHEGPK	AGVPLGVMLHHTLR	AIEAAGGK
AGQPAQQSDLINVAQLTSQYYVLQPDAEDPAHAVK	AGVRPVVAEENLLAQPADGAISQLGAIR	AIEAKPAVIALNIVR
AGQQQIILGK	AGVSNLLDILSGVTGQSIPELEAQFTGQM*YGHLK	AIEDLIAK
AGQSIGIVGSSLGGYFATWLSQR	AGVSNLLDILSGVTGQSIPELEAQFTGQMYGHLK	AIEHNYWQPQYR
AGQSIIVMGVSGSGK	AGVTAQNIADAYHHAYQNKPLVR	AIEHSGYSVFAGVGER
AGQYAYR	AGVTGAENHGQLPLNHLVDK	AIELLGTM*QGGYNIHPLIDALDNEQLAPIAAK
AGQYLMVVMDER	AGVTGAENHGQLPLNHLVDKLR	AIELLGTMQGGYNIHPLIDALDNEQLAPIAAK
AGQYSTTITRPALFR	AGVVHNDIKPGNVVFDR	AIEMYGAPIYVR
AGREAGVHMQVVR	AGVYDKNKLFGITTLDTIR	AIENAITQAGALADGFK
AGRPASASPAVGYLSVHQK	AGWVEHDPMEIWATQSSTLIEVLAK	AIENFYISNSK
AGSAKPAAQHLLDLK	AGYELLNLQTYFTAGVK	AIESNASQALQ
AGSATRPFFGVQPALVDNLGNPQEGVAEGNLVITDSWPGQAR	AGYLDSYIPEPER	AIESNASQALQALLR
AGSGALTLGQPNSPGVPTDFAK	AGYSISIPFTPGR	AIEWDESFK
AGSLDEAMAALNEDREFLTR	AGYTIVTTSSHK	AIEWDESFKNMDDPSGR
AGTADAPENTFPAISK	AGYTQANQLINLCER	AIEYAITNDR
AGTATVRPNAGSDDVLGNGSFK	AHADIQDAFYQVFDK	AIFAAMPNHGILINIAR
AGTEIGVASTK	AHALGVNAPELAK	AIFISAMDTQPLAADPQVIIATESEAFNHGLTVLTR
AGTEVSALLGR	AHAPLAATSQPGRK	AIFPNPNEALLPGMFVR
AGTGASAAVAGYGLR	AHDATVAVGTNQTGTNNR	AIGEVTDVVEK
AGTGGDEAAIFAGDMFR	AHELEATAFALFTK	AIGEVTDVVEKEMYTFDDR
AGTGHFYTTTK	AHELM*ESSTHIGK	AIGHIKSMLLQR
AGTGYAYHQDR	AHELMESSTHIGK	AIGINYIDTYVR
AGTHDSHGAPLGEAEVAATR	AHEMLAAVGLEK	AIGPEPIAAAYVQPSR
AGTPEKVDLNPIGTGPFQLQQYQK	AHFINTIR	AIGTLAAYANK
AGVAPSMVEQAR	AHFNGVIVGAGAYSAEK	AIGWIDNAVTELLGLIVQR
AGVDEGMSGLSTR	AHFVTIFAK	AIHADGMSAVQAER
AGVDETSLTLPLVVTEDR	AHFVTIFAKPAGR	AIHTLWNILDELDQAWLPTEK
AGVDETSLTLPLVVTEDREATLATR	AHFYLRPHYQLE	AIIAGLVAGGYPAK
AGVFLISPFVGR	AHFYLRPHYQLEGM	AIIDAILNGEIDKAETFTLPIFDLAVPM*ALPGVNPDILDPR
AGVGDEVAAVTER	AHFYLRPHYQLEGM*TVSLR	AIIDAILNGEIDKAETFTLPIFDLAVPMALPGVNPDILDPR
AGVIAFNLGQHHAYDVGSFLDQYGIAIR	AHFYLRPHYQLEGMTVSLR	AIISGVNSSDEDR
AGVIGFSK	AHGGEHIQIISK	AIISGVNSSDEDRWDAVLK
AGVLAEVR	AHHYPAELSGGQQQR	AIIVAHNANFDHSFVMAAAER
AGVLTNTPGQLN	AHIEQM*KK	AILAHER
AGVLTNTPGQLNNN	AHILEALAIALANIDPIIELIR	AILEDGGVIR
AGVLTNTPGQLNNNFFVN	AHIVELVR	AILGM*DELSEDDKLVVSR
AGVLTNTPGQLNNNFFVNLLDM*STK	AHLAPFVPGHSVVQIDGMTTQQGAVSAAPFGSASILPISWMYIR	AILLGGEMLDTQAMPTSLAETIAQEDSVVGR
AGVLTNTPGQLNNNFFVNLLDMSTK	AHLASIANIQLER	AILVENGQPVEFDEPLVVIE
AGVPGIPANSTLIFDVELLDVK	AHLGAGVITQR	AILWM*IVPQGLPYSIVNQPLGK
AGVPLGVM*LHHTLR	AHLGALYHVPAGLR	AILWMIVPQGLPYSIVNQPLGK
AGVPLGVMLHHTLR	AHLMEELKK	AIM*TSDLGLNPSSAGTVIR
AGVPVVFVDFR	AHLQVVDKLK	AIMIAHTLGNLFDLAEVR
AGVRPVVAEENLLAQPADGAISQLGAIR	AHM*PNILQWQR	AIMTSDLGLNPSSAGTVIR
AGVSNLLDILSGVTGQSIPELEAQFTGQM*YGHLK	AHNIVLSQQR	AIMTSDLGLNPSSAGTVIRVPLPALTEER
AGVSNLLDILSGVTGQSIPELEAQFTGQMYGHLK	AHNKTSVPVFGVDALPEALALVK	AINADDFLSVLDTFR
AGVSYWDGR	AHNNPVTASVSAPVAPVTR	AINADDFLSVLDTFRK
AGVTAQNIADAYHHAYQNKPLVR	AHPDVFNILLQVLDDGR	AINALANPTT
AGVTGAENHGQLPLNHLVDKLR	AHPDVFNILLQVLDDGRLTDGQGR	AINALANPTTN
AGVVHNDIKPGNVVFDR	AHPDVFNLLLQVMDNGTLTDNNGR	AINALANPTTNS
AGVYDKNK	AHPEKDNLLVPIPTPQPLANALTLNLSK	AINALANPTTNSYK
AGVYDKNKLFGITTLDTIR	AHPNIPALLNPVFATLDGPTLQK	AINALANPTTNSYKR
AGYDLKLNSR	AHPTFALMHISLK	AINHAFIVDR
AGYELLNLQTYFTAGVK	AHQALLTDR	AINQALEQGYR
AGYLDSYIPEPER	AHQDNIDGTWQSLSQLTPQELNTMVINADENVLQGWLDLLR	AINSFAGFR
AGYSISIPFTPGR	AHQNFM*SAVSK	AINSVNTLVNTGGYLK
AGYSISIPFTPGRTDASQEETDVSSFAVLEPTADGFR	AHQNFMSAVSK	AINWNEADQGVTFEYEEIPADMAELAAEWHQN
AGYTAVISHR	AHQQIGMEVLNR	AIPWIFAWTQNR
AGYTIVTTSSHK	AHRPIIDELQER	AIQAALDELQK
AHADIQDAFYQVFDK	AHSHANLGWETFTDK	AIQHGLAIASGIK
AHAIAGLK	AHSTIAQVVEQVQK	AIQKELGEMDDTPDEHEALKR
AHAIAGLKGDNEDQNVGIK	AHSTIAQVVEQVQKR	AIQQEIENPLAQQILSGK
AHAPLAATSQPGRK	AHSVIAFK	AIQTPSEEYVALGLK
AHDATVAVGTNQTGTNNR	AHTALPSILDYK	AIQYQQALQALER
AHELEATAFALFTK	AHVGDFIFTSK	AISAEFGVKPFLPDHIQFIHSESLR
AHELM*ESSTHIGK	AHVLPLGIEQLPELAAFDTVFSMGVLYHR	AISDVADQASHLSFEEFLVVAAK
AHELMESSTHIGK	AHVTSVTLGEHLTGFVGEM*IQSGR	AISESNQYTDHK
AHEM*LAAVGLEKR	AHVTSVTLGEHLTGFVGEMIQSGR	AISHYQEQQQPAR
AHEMLAAVGLEK	AHWQQVLQLGFPGSK	AISPLYAPGEVDK
AHFGFSMPVLYTSR	AHYDDEVVYISDR	AISYLSSRPATSLPLALR
AHFINTIR	AHYVLLNVEAPQEAIDELETNFR	AITDVVNIGIGGSDLGPYMVTEALRPYK
AHFVTIFAK	AIAAEVLKK	AITEDISALSAVSQVDFDGIILK
AHFVTIFAKPAGR	AIAAGQYAFGENYVQEGVDKIHSFVDNK	AITEGPLAGLTAR
AHFYLRPHYQLE	AIADDILYHR	AITESLKEGDPVQLVGFGTFK
AHFYLRPHYQLEGM*TVSLR	AIADIAAQNR	AITEVEDENSADM*FTAASR
AHFYLRPHYQLEGMTVSLR	AIADLDKQPDSVSSVLK	AITEVEDENSADMFTAASR
AHGGEHIQIISK	AIADNAKPADLNRPGHVFPLR	AITGSNKRPLK
AHGLKPIVVINK	AIAEATEAGLLGK	AITQLILNLVEGSPIK
AHHTVLVSNVIGVER	AIAELLVER	AITTLPADVQAK
AHHYPAELSGGQQQR	AIAESTDLPQILYNVPSR	AIVAWQQTGHADREIAYRPAR
AHIEQM*KK	AIAGIQPNLLK	AIVEAAGLNVA
AHIEQMKK	AIAGLKGDNEDQNVGIK	AIVEAAGLNVADIVK
AHILEALAIALANIDPIIELIR	AIAGSYHAVVGLPLVETHELLSHFIAQR	AIVEAAHEFGR
AHILEALAIALANIDPIIELIRR	AIAIEPEVLLLDEPTSALDPISTLTIEELITTLK	AIVETLGWEGK
AHLAPFVPGHSVVQIDGMTTQQGAVSAAPFGSASILPI	AIALDPELIM*FDEPFVGQDPITMGVLVK	AIVETPPVLVR
AHLAPFVPGHSVVQIDGMTTQQGAVSAAPFGSASILPISWMYIR	AIALDPELIMFDEPFVGQDPITMGVLVK	AIVMPNLAQPITTVA
AHLASIANIQLER	AIALQLVPEAQR	AIVMPNLAQPITTVASAIAYR
AHLGAGVITQR	AIAM*FTLAQQYLSGPVAG	AIVQLEDGIQIGAGDTLAR
AHLGALYHVPAGLR	AIAMFTLAQQYLSGPVAG	AIVQYLADKVPDR
AHLM*EELKK	AIAPNRLPVPAPMAVGAIQTR	AIVQYVGDNAK
AHLMEELKK	AIAQVGTISAN	AIWEQELTDMR
AHMPNILQWQR	AIAQVGTISANSD	AKAAEQLEAIKTK
AHNIVLSQQR	AIAQVGTISANSDS	AKAARRYGAMCAM*SAKLLGFAGGVITGGEYMAR
AHNKTSVPVFGVDALPEALALVK	AIAQVGTISANSDSTVGELIAQ	AKAAVEDAQDIAALDLVR
AHNNPVTASVSAPVAPVTR	AIAQVGTISANSDSTVGELIAQAM	AKADWVVTSSIAVELIEHLDSLGEK
AHPDFRDELTQAAK	AIAQVGTISANSDSTVGELIAQAM*	AKAEAQVIIEQASK
AHPDVFNILLQVLDDGR	AIAQVGTISANSDSTVGELIAQAM*E	AKAEAQVIIEQASKR
AHPDVFNILLQVLDDGRLTDGQGR	AIAQVGTISANSDSTVGELIAQAM*EK	AKAEHNESYYPVAAALLDVSTNQPA
AHPDVFNLLLQVMDNGTLTDNNGR	AIAQVGTISANSDSTVGELIAQAMEK	AKAESALKDTR
AHPEKDNLLVPIPTPQPLANALTLNLSK	AIASDCADGM*TK	AKAETDQIR
AHPNIPALLNPVFATLDGPTLQK	AIDDAVAGKPFDPSLLTTLEGLAHR	AKAEVENIR
AHPTFALMHISLK	AIDESLSKK	AKAEVENIRR
AHQDNIDGTWQSLSQLTPQELNTMVINADENVLQGWLDLLR	AIDGKLESLEIK	AKAPFIALNMAAIPK
AHQNFM*SAVSK	AIDGKLESLEIKK	AKAPWPSSEAELNALWDAK
AHQNFMSAVSK	AIDHLLSELMEVR	AKCHLHADYGSVDKIPIHLGGCARR
AHQQIGMEVLNR	AIDKPFLLPIEDVFSISGR	AKDEADEKDAIATVNTKPEESNFSSAMAEAFK
AHRPIIDELQER	AIDLIDEAGSSIR	AKDFTLVAK
AHSALLEVHNIADEIAAR	AIDMALAHQGLPAAGEALVSTWIGNGADVLVER	AKDKIMMGAER
AHSHANLGWETFTDK	AIDMHISNLR	AKDQIAVVGIAMPAQAAPYLMR
AHSQLLTQLQQQLSDSQR	AIDRPFLLPIEDVFSISGR	AKDSAELIAVMKK
AHSTIAQVVEQVQK	AIDSLSYTEAQK	AKEDNIEMQGTVLDTLPNTMFR
AHSTIAQVVEQVQKR	AIDSLSYTEAQKQSVYR	AKEIQQQIDYAK
AHSVIAFK	AIDVIDEAGAR	AKELAPEQAAAIKPFDR
AHTALPSILDYK	AIDVLDTAAAR	AKELNPTENIEK
AHVGDFIFTSK	AIEAKPAVIALNIVR	AKFEEQR
AHVKGQPAQLLLAGMVNTALSKLPIPK	AIEALSEAIK	AKFLSSELKEFK
AHVLAVDIDEQR	AIEEASSGLYVPSPGVIYPTLTLLEEQDFVTPVATGNGR	AKFSSIFGQSESR
AHVLFTRDVDYIVK	AIEHNYWQPQYR	AKGLNTAVGDEGGYAPNLGSNAEALAVIAEAVK
AHVLPLGIEQLPELAAFDTVFSMGVLYHR	AIEHSGYSVFAGVGER	AKGQSLQDPFLNALR
AHVTSVTLGEHLTGFVGEM*IQSGR	AIELLGTM*QGGYNIHPLIDALDNEQLAPIAAK	AKHIQFTTTGGPDVLQYLEFTPSDPAPHEVQVENK
AHVTSVTLGEHLTGFVGEMIQSGR	AIELLGTMQGGYNIHPLIDALDNEQLAPIAAK	AKHLFTSESVSEGHPDK
AHYVLLNVEAPQEAIDELETNFR	AIEMYGAPIYVR	AKHLFTSESVSEGHPDKIADQISDAVLDAILEQDPK
AHYVLLNVEAPQEAIDELETNFRFNDAVIR	AIENFYISNSK	AKHQVWLLQDTARPSIFVSQLSELGALVQR
AIAAGQYAFGENYVQEGVDKIHSFVDNK	AIENTITQAGALADGFK	AKIDQLSSDVQTLNAK
AIADIAAQNR	AIESNASQALQALLR	AKIELSSAQQTDVNLPYITADGSGPK
AIADLDKQPDSVSSVLK	AIEWDESFK	AKIFSEIGKK
AIADNAKPADLNRPGHVFPLR	AIEWDESFKNMDDPSGR	AKIVADFGR
AIAEATEAGLLGK	AIEYAITNDR	AKKDLDLAQANATDQLKK
AIAELLVER	AIEYVIDGDREYRQLEAELQAANEK	AKKEM*VEANLR
AIAESTDLPQILYNVPSR	AIFAAM*PNHGILINIAR	AKKPVNFEPDSAFRPDAAAAKPDDK
AIAFNREEDIPVTADSLLFGLSALAQYIEDPEEVYFVK	AIFAAMPNHGILINIAR	AKKVDAIISSLSITEKR
AIAGIQPNLLK	AIFISAM*DTQPLAADPQVIIATESEAFNHGLTVLTR	AKLEAAAAEIK
AIAGLKGDNEDQNVGIK	AIFISAMDTQPLAADPQVIIATESEAFNHGLTVLTR	AKLESLVEDLVNR
AIAGSYHAVVGLPLVETHELLSHFIAQR	AIFPNPNEALLPGMFVR	AKLHDYYKDEVVK
AIAIEPEVLLLDEPTSALDPISTLTIEELITTLK	AIGAEGTAVGEVVFNTSMTGYQEILTDPSYSR	AKLYEFEM*QKK
AIAKELGAVFLIGIGGK	AIGEHIPQAK	AKLYEFEMQKK
AIALDPELIM*FDEPFVGQDPITMGVLVK	AIGEVTDVVEK	AKNFEEAVEK
AIALDPELIMFDEPFVGQDPITMGVLVK	AIGEVTDVVEKEMYTFDDR	AKNFEEAVEKAEK
AIALQLVPEAQR	AIGIEQPSLVR	AKNHQVIGVSESYSSPTAAK
AIAM*FTLAQQYLSGPVAG	AIGINYIDTYVR	AKNPTIKIETLVPDFR
AIAMFTLAQQYLSGPVAG	AIGPEPIAAAYVQPSR	AKPAVATPAAVSTDVEQPGFFSR
AIAPCVILASVLTMCR	AIGTLAAYANK	AKPGQSFFPLTVNYQER
AIAPHFAQHHNVTIR	AIGVSNFHPDR	AKPLPAVEDRK
AIAQVGTISAN	AIGWIDNAVTELLGLIVQR	AKPVLLEPIM*K
AIAQVGTISANSD	AIHADGMSAVQAER	AKPVLLEPIMK
AIAQVGTISANSDSTVG	AIHQQFGPDVR	AKPVLLEPIMKVEVETPEDYMGDVMGDLNR
AIAQVGTISANSDSTVGELIAQAM	AIHTLWNILDELDQAWLPTEK	AKQAAALVLVNGQLEHLTAQER
AIAQVGTISANSDSTVGELIAQAM*	AIHYIGDLVQR	AKQDLGYGMLLK
AIAQVGTISANSDSTVGELIAQAM*EK	AIIAGLVAGGYPAK	AKQDLGYGMLLKR
AIAQVGTISANSDSTVGELIAQAMEK	AIIDAILNGEIDKAETFTLPIFDLAVPMALPGVNPDILDPR	AKQIASGVDGATEVYNEMR
AIASDCADGM*TK	AIIIGTHGAAAEQLLK	AKQPWQQGAVLVSSR
AIDAIINQR	AIISGVNSSDEDR	AKRPLAAAEVQVEDVEDDPGFYR
AIDDAVAGKPFDPSLLTTLEGLAHR	AIISGVNSSDEDRWDAVLK	AKSDVFHLGLTK
AIDESLSKK	AIIVAHNANFDHSFVMAAAER	AKSFLDGVKK
AIDGKLESLEIK	AIKLDELPR	AKSGHPGAPMGMADIAEVLWR
AIDGKLESLEIKK	AILEDGGVIR	AKSTLTPVVISNMDEIKELIK
AIDKPFLLPIEDVF	AILGM*DELSEDDKLVVSR	AKTVYTTENPDLLVLEFR
AIDKPFLLPIEDVFSI	AILVENGQPVEFDEPLVVIE	AKVDQLSNDVNAVR
AIDKPFLLPIEDVFSISGR	AILWMIVPQGLPYSIVNQPLGK	AKVGEALNEDTQFHGASPYSISK
AIDLIDEAGSSIR	AIM*IAHTLGNLFDLAEVR	AKVGNLYVNR
AIDMALAHQGLPAAGEALVSTWIGNGADVLVER	AIM*QHYQAR	AKVTEKPTTFSELM*NQTTAA
AIDMHISNLR	AIM*TSDLGLNPSSAGTVIR	AKVTEKPTTFSELMNQTTAA
AIDRPFLLPIEDVFSIS	AIMIAHTLGNLFDLAEVR	AKYPNLQIVGGNVATGAGAK
AIDRPFLLPIEDVFSISGR	AIMQHYQAR	AKYPVHLSGGQQQR
AIDSLSYTEAQK	AIMTSDLGLNPSSAGTVIR	ALAAALGQIEK
AIDSLSYTEAQKQSVYR	AIMTSDLGLNPSSAGTVIRVPLPALTEER	ALADAGVSAVK
AIDVIDEAGAR	AINADDFLSVLDTFR	ALADGATDYLDR
AIEAAGGK	AINADDFLSVLDTFRK	ALADYQNLLTR
AIEAKPAVIALNIVR	AINALANPTT	ALAEHGIVFGEPK
AIEALSEAIK	AINALANPTTN	ALAESLNWR
AIEEASSGLYVPSPGVIYPTLTLLEEQDFVTPVATGNGR	AINALANPTTNS	ALAESSPLAR
AIEEQGKSLDDFLL	AINALANPTTNSYK	ALAFISER
AIEFLTELVVK	AINALANPTTNSYKR	ALAHQYR
AIEHSGYSVFAGVGER	AINKTHLQTAMGLQLAENKPIFAVVSR	ALAIDAIINQR
AIELLGTM*QGGYNIHPLIDALDNEQLAPIAAK	AINSFAGFR	ALAINLVDPAAAPVVIDK
AIELLGTMQGGYNIHPLIDALDNEQLAPIAAK	AINSVNTLVNTGGYLK	ALALLDQAIEIEQLFLHDLGALR
AIEMYGAPIYVR	AIPWIFAWTQNR	ALALLEHQLR
AIENFYISNSK	AIQEGLLTVEKK	ALAMEPDVLLFDEPTSALDPELVGEVLR
AIENTITQAGALADGFK	AIQHGLAIASGIK	ALAMQPQVILFDEPTSALDPELVGEVLSTIR
AIESNASQALQ	AIQKELGEMDDTPDEHEALKR	ALAQQFIEFINQPQYVK
AIESNASQALQALLR	AIQNSGGIVK	ALAQQSTETVGMIVSDVSDPFFGAMVK
AIEWDESFK	AIQQEIENPLAQQILSGK	ALASNILYR
AIEWDESFKNMDDPSGR	AIQYQQALQALER	ALASNILYRFPDITPVNVVGHSDIAPGR
AIEWLNFIATELHK	AIRPWQHVLEPLSGYLLLAQK	ALASNILYRFPDITPVNVVGHSDIAPGRK
AIEYAITNDR	AISDVADQASHLSFEEFLVVAAK	ALATFLFDSDDAM*VR
AIFAAM*PNHGILINIAR	AISHYGSSREKNIGDVR	ALATFLFDSDDAMVR
AIFAAMPNHGILINIAR	AISHYQEQQQPAR	ALDAIITSVTESLK
AIFISAMDTQPLAADPQVIIATESEAFNHGLTVLTR	AISPLYAPGEVDK	ALDAIITSVTESLKEGDDVALVGFGTFAVR
AIFPNPNEALLPGM*FVR	AISYLSSRPATSLPLALR	ALDALLDYQDYPIAAAQR
AIFPNPNEALLPGMFVR	AITDIFEPGSTVKPMVVMTALQHGVVK	ALDAQTQDFAAR
AIGEVTDVVEK	AITDVVNIGIGGSDLGPYMVTEALRPYK	ALDAYYALQQK
AIGEVTDVVEKEMYTFDDR	AITEDISALSAVSQVDFDGIILK	ALDDHTLEVTLSEPVPYLDK
AIGIEQPSLVR	AITEGPLAGLTAR	ALDDHTLEVTLSEPVPYLDKLLAHPSMSPVNK
AIGPEPIAAAYVQPSR	AITESLKEGDPVQLVGFGTFK	ALDEVAANDALPSSVR
AIGTLAAYANK	AITEVEDENSADM*FTAASR	ALDFLLEQGFIHR
AIGTLAAYANKGQVK	AITEVEDENSADMFTAASR	ALDGAHEVLAPEGR
AIGTLAAYANKGQVKVNR	AITGSNKRPLK	ALDGDMQGR
AIGVSNFHPDR	AITQLILNLVEGSPIK	ALDIELLR
AIGVSNFHPDRLADLMAFNK	AITTLPADVQAK	ALDILTATPPDVFNHNLENVPR
AIGWIDNAVTELLGLIVQR	AIVAWQQTGHADREIAYRPAR	ALDMLNVDAEGFDFMDR
AIHADGMSAVQAER	AIVEAAGLK	ALDPLTGPQPYQGR
AIHQQFGPDVR	AIVEAAHEFGR	ALDQHTIDGFVYR
AIHTLWNILDELDQAWLPTEK	AIVETPPVLVR	ALDREHFISVVGADQEDAQM*LAQELR
AIIAEPQIAHVAAPSAIADNAVPTSQGGQHR	AIVGSNAFAHSSGIHQDGVLK	ALDREHFISVVGADQEDAQMLAQELR
AIIAGLVAGGYPAK	AIVLGGEM*LDTQAMPTSLAETIAQEDSVVGR	ALDSYDK
AIIDAILNGEIDKAETFTLPIFDLAVPM*ALPGVNPDILDPR	AIVM*PNLAQPITTVAS	ALDTADKTNTELTSM*IEGVELTLK
AIIIGTHGAAAEQLLK	AIVMPNLAQPITTVA	ALDTADKTNTELTSMIEGVELTLK
AIILDNAGSDATIGPLKK	AIVMPNLAQPITTVASAIAYR	ALEALGAQTWFAGLR
AIISGVNSSDEDR	AIVNVSSIFQQLPAR	ALEDEFYLELK
AIISGVNSSDEDRWDAVLK	AIVQLEDGIQIGAGDTLAR	ALEDMKSPEMVAAK
AIKLDELPR	AIVQYLADKVPDR	ALEEAHPDVELYTASIDQGLNEHGYIIPGLGDAGDK
AILGM*DELSEDDKLVVSR	AIVQYVGDNAK	ALEEANIPVREEWIVQGDFEPESGYK
AILLADSFK	AIWEQELTDMR	ALEELDDEYLK
AILVENGQPVEFDEPLVVIE	AKAAEQLEAIK	ALEELDDEYLKER
AILWMIVPQGLPYSIVNQPLGK	AKAAEQLEAIKTK	ALEGDAEWEAK
AIM*QHYQAR	AKAEAQVIIEQASK	ALEGEAEWEAK
AIM*TSDLGLNPSSAGTVIR	AKAEAQVIIEQASKR	ALEHTHLK
AIMAAVVGDK	AKAEHNESYYPVAAALLDVSTNQPA	ALEIEEMQLK
AIMIAHTLGNLFDLAEVR	AKAESALKDTR	ALEIISELAAK
AIMQHYQAR	AKAETDQIR	ALEKRPVSSDDVETAISHIK
AIMTSDLGLNPSSAGTVIR	AKAEVENIR	ALEMIDMHGGDLFSEE
AIMTSDLGLNPSSAGTVIRVPLPALTEER	AKAEVENIRR	ALENGEQVK
AINADDFLSVLDTFR	AKAPWPSSEAELNALWDAK	ALESAENQQASLTR
AINADDFLSVLDTFRK	AKDAGYTAVISHR	ALESLWDTWQEMQEPENR
AINALANPTTN	AKDEADEKDAIATVNTKPEESNFSSAM*AEAFK	ALESLWDTWQEMQEPENRR
AINALANPTTNS	AKDEADEKDAIATVNTKPEESNFSSAMAEAFK	ALESTLAAITESLK
AINALANPTTNSYK	AKDFTLVAK	ALETEEIPGIINDFR
AINALANPTTNSYKR	AKDGLALSSR	ALFAAEQTPANQS
AINEQLKYAGNKDAAAAVGK	AKDKIM*M*GAER	ALFATGNFEDVR
AINHTFIVDR	AKDKNDSFR	ALFGETLPQQPTFVQAVTEAYLSLR
AINKTHLQTAM*GLQLAENKPIFAVVSR	AKDLLVAIER	ALFGHLGHVGSSM*VR
AINKTHLQTAMGLQLAENKPIFAVVSR	AKDQIAVVGIAMPAQAAPYLM*R	ALFGHLGHVGSSMVR
AINKVLAANKYQLK	AKDQIAVVGIAMPAQAAPYLMR	ALFNLLSEEEHQR
AINSFAGFR	AKDSAELIAVM*K	ALFNRIDLDKVNEMVASSKEDMAPATR
AINSVNTLVNTGGYLK	AKDSAELIAVMK	ALFPSAFEDVNPQR
AIPDDLYEASAM*DGAGPFQNFFR	AKDSAELIAVMKK	ALFSHPQHDR
AIPEKLETALVSAGR	AKEDNIEM*QGTVLDTLPNTM*FR	ALGANLVLTEGAK
AIPSLDESFVVIHFR	AKEDNIEM*QGTVLDTLPNTMFR	ALGASSILVLPIEK
AIPWIFAWTQNR	AKEDNIEMQGTVLDTLPNTM*FR	ALGDFINASR
AIQAALDELQK	AKEDNIEMQGTVLDTLPNTMFR	ALGDSAVTYGASSTAQK
AIQAALDELQKNR	AKEILGATATLEFR	ALGDSAVTYGASSTAQKDGVAIGAR
AIQHGLAIASGIK	AKEIMDAGK	ALGFNSTNIDLIYGLPK
AIQHGLAIASGIKAAK	AKEIQQQIDYAK	ALGFSGVQNFPTVGLIDGNFR
AIQIPYALGLIATR	AKEITKQEAEANNYEK	ALGGASGGYTAGR
AIQQEIENPLAQQILSGK	AKELAPEQAAAIKPFDR	ALGGASGGYTAGRK
AIQTPSEEYVALGLK	AKELLNEAGWEVK	ALGLQNTHFK
AIQYQQALQALER	AKELNPTENIEK	ALGLSNTHFMTVHGLDSPGQYSTAR
AISDVADQASHLSFEEFLVVAAK	AKELQANGVMVDSPAQFK	ALGM*NDELAHSSIR
AISHYQEQQQPAR	AKGGDKDAKAELEALEK	ALGMNDELAHSSIR
AISPLYAPGEVDK	AKGLNTAVGDEGGYAPNLGSNAEALAVIAEAVK	ALGNPARPM*VAIVGGSK
AISQVLDQGQSLSAVLPELQK	AKGQPLPALAAVPYAVK	ALGNPARPMVAIVGGSK
AISYLSSRPATSLPLALR	AKGQSLQDPFLNALR	ALGTVTVTETAYGLLFTPH
AITDIFEPGSTVKPMVVMTALQHGVVK	AKGQSLQDPFLNALRR	ALGTVTVTETAYGLLFTPHLTGLAPGIHGF
AITDVVNIGIGGSDLGPYM*VTEALRPYK	AKHDLLLK	ALGTVTVTETAYGLLFTPHLTGLAPGIHGFH
AITDVVNIGIGGSDLGPYMVTEALRPYK	AKHLFTSESVSEGHPDK	ALGVGEVK
AITEGPLAGLTAR	AKHLFTSESVSEGHPDKIADQISDAVLDAILEQDPK	ALGVTFFLPEGDAISASR
AITESLKEGDPVQLVGFGTFK	AKIDQLSSDVQTLNAK	ALGYTEPDPR
AITEVEDENSADM*FTAASR	AKIELSSAQQTDVNLPYITADGSGPK	ALHAESGGTHYK
AITEVEDENSADMFTAASR	AKIFSEIGKK	ALHEIYFPGFEYAMEK
AITGSNKRPLK	AKISQFFE	ALHFGAGNIGR
AITHVIDLLDTGALR	AKIVADFGR	ALIADAIVR
AITQLILNLVEGSPIK	AKKDLDLAQANATDQLKK	ALIANELEQHVWPLLSEGK
AITQLILNLVEGSPIKLVDGGAQK	AKKEM*VEANLR	ALIATPSISAADSALDQSNEALINLLAGWFADLGFR
AITTLPADVQAK	AKKPVNFEPDSAFRPDAAAAKPDDK	ALIEEM*ASAYEDPQEVIEFYSK
AIVAWQQTGHADREIAYRPAR	AKKVDAIISSLSITEKR	ALIEEMASAYED
AIVEAAGLK	AKLEAAAAEIK	ALIEEMASAYEDPQEVIEFYS
AIVEAAHEFGR	AKLESLVEDLVNR	ALIEEMASAYEDPQEVIEFYSK
AIVETLGWEGK	AKLHDYYKDEVVK	ALIGFAGPR
AIVLGGEMLDTQAMPTSLAETIAQEDSVVGR	AKLYEFEM*QKK	ALIGIITNPVNTTVAIAAEVLK
AIVM*PNLAQPITTVA	AKLYEFEMQKK	ALIHESIYAPFM*AR
AIVM*PNLAQPITTVASAIAYR	AKNFEEAVEK	ALIHESIYAPFMAR
AIVMPNLAQPITTVA	AKNFEEAVEKAEK	ALILEQIEGR
AIVMPNLAQPITTVASAIAYR	AKNHQVIGVSESYSSPTAAK	ALILQPQLLILDEPTSSLDKSVQAQILALLK
AIVNVSSIFQQLPAR	AKNHQVIGVSESYSSPTAAKNGIASVMK	ALINAELAELALK
AIVQLEDGIQIGAGDTLAR	AKPAVATPAAVSTDVEQPGFFSR	ALINAELAELALKNEWEGIVVYGAVR
AIVQYVGDNAK	AKPGQSFFPLTVNYQER	ALIPDDAHLHHWLDMAR
AIWEQELTDMR	AKPLPAVEDRK	ALISTNDQGVTIHLTSHDQLGGIQR
AKAAEQLEAIK	AKPVLLEPIM*K	ALITTLQIYLDETRPFMGK
AKAAEQLEAIKTK	AKPVLLEPIMK	ALIVGEPTFGK
AKAANSLGGLSSSGAGCKNVWQSGSVI	AKPVLLEPIMKVEVETPEDYMGDVMGDLNR	ALKDPENYNVR
AKAEAQVIIEQASK	AKQDLGYGM*LLK	ALKPAIVVPGHFLDNAPQTLESVTFTQNYLTTLNAEIPK
AKAEAQVIIEQASKR	AKQDLGYGMLLK	ALLAAFKFPFR
AKAEHNESYYPVAAALLDVSTNQPA	AKQDLGYGMLLKR	ALLAAFKFPFRK
AKAESALKDTR	AKQGLLEGLHR	ALLDGLSPLPSADPQVR
AKAETDQIR	AKQIASGVDGVTEVYNEM*R	ALLDKTIATAQTTGVAEK
AKAEVENIR	AKQIASGVDGVTEVYNEMR	ALLDTLLR
AKAEVENIRR	AKQPASQLVGLQYNTCCWTVNLGYER	ALLEFDQQEPALQAEIK
AKAHSTIAQVVEQVQK	AKQPGLDFQSAK	ALLENTELGAR
AKAPWPSSEAELNALWDAK	AKQPWQQGAVLVSSR	ALLESMPEPVFSIDLK
AKASILDANNR	AKRPLAAAEVQVEDVEDDPGFYR	ALLFSVPAGPGCRAASR
AKAVVLTVGTFLDGK	AKSDVFHLGLTK	ALLHSAPLWLLDEPTEGLDAETEQQILALLR
AKDAGYTAVISHR	AKSFLDGVKK	ALLIALEPQLEPK
AKDEADEKDAIATVNTKPEESNFSSAM*AEAFK	AKSTLTPVVISNMDEIKELIK	ALLKDKEISEDEDRR
AKDEADEKDAIATVNTKPEESNFSSAMAEAFK	AKTDPSLGIAYPK	ALLLAALAEGTTQLNNVLDSDDIR
AKDFTLVAK	AKVDQLSNDVNAVR	ALLLDAEILILDDALSAVDGQTEHEILK
AKDGLALSSR	AKVGNLYVNR	ALLLKEDEIVINR
AKDISAYYDDLIEMTSYYHLLGEGTHQVNGK	AKVSSIFGQSESSR	ALLLKEDEIVINRK
AKDKIM*M*GAER	AKVTEKPTTFSELM*NQTTAA	ALLNNLIYQPTLQEEDLGNKEVVTQWIDSLVVLLNEK
AKDKNDSFR	AKVTEKPTTFSELMNQTTAA	ALLNRPQLLVLDEPTQGVDVNGQLALYDLIEQLR
AKDQIAVVGIAM*PAQAAPYLMR	AKYCSPAIQTISKVIPIK	ALLNRPQLLVLDEPTQGVDVNGQLALYDLIEQLRK
AKDQIAVVGIAMPAQAAPYLM*R	AKYPNLQIVGGNVATGAGAK	ALLNSM*VIGVTEGF
AKDQIAVVGIAMPAQAAPYLMR	AKYPVHLSGGQQQR	ALLNSM*VIGVTEGFTK
AKDSAELIAVM*KK	ALAAALGQIEK	ALLNSMVIGVTEGFT
AKDSAELIAVMK	ALAAAPGVAVAEGWQDISQPSLDLVYEASTLDSTLER	ALLNSMVIGVTEGFTK
AKDSAELIAVMKK	ALADAGVSAVK	ALLNSMVIGVTEGFTKK
AKEDNIEM*QGTVLDTLPNTMFR	ALADYQNLLTR	ALLPQLPTEVQSR
AKEDNIEMQGTVLDTLPNTM*FR	ALAEHGIVFGEPK	ALLPTLQAVAELGLLPEQQVADLSGSYLFLR
AKEDNIEMQGTVLDTLPNTMFR	ALAESSPLAR	ALLQISEPGLTAAPHQR
AKEILGATATLEFR	ALAIDAIINQR	ALLQTSEWLEDK
AKEIMDAGK	ALAINLVDPAAAPVVIDK	ALLSMAIQAAK
AKEIMDAGKLVTDELVIALVK	ALAIYKDILK	ALLSMAIQAAKR
AKEITKQEAEANNYEK	ALAIYKDILKDAPDDIDALIYLSAWSR	ALLSRPAINASER
AKELAPEQAAAIKPFDR	ALALLDQAIEIEQLFLHDLGALR	ALLSVSDK
AKELNPTENIEK	ALALLEHQLR	ALLTAPELLLMDEPLASLDLPR
AKELQANGVM*VDSPAQFK	ALAM*QPQVILFDEPTSALDPELVGEVLSTIR	ALLVIENAK
AKELQANGVMVDSPAQFK	ALAMEPDVLLFDEPTSALDPELVGEVLR	ALLVSHGVGQGR
AKENPNLVSAEHYR	ALAMMPAEVFER	ALM*AEGDKAIEGTKR
AKFLSSELKEFK	ALANGADAIWITLQLSK	ALM*GANM*QR
AKFPNPEHQLLPGMFVR	ALAQFSCPK	ALM*M*STNNILSPANGEPIIVPSQDVVLGLYYM*TR
AKFSSIFGQSESR	ALAQQFIEFINQPQYVK	ALMAEGDK
AKFSSIFGQSESRSK	ALAQRPVLMLLDEPFSALDTALR	ALMAEGDKAIEGTK
AKGLASYM*ANK	ALASLVDQTAETK	ALMAEGDKAIEGTKR
AKGLNTAVGDEGGYAPNLGSNAEALAVIAEAVK	ALASLVDQTAETKR	ALMASGEKPFDWGGAETLAYATLVDEGIPIR
AKGQSLQDPFLNALR	ALASNILYR	ALMEYDESLR
AKGQSLQDPFLNALRR	ALASNILYRFPDITPVNVVGHSDIAPGR	ALMEYDESLRGELR
AKGSTGRFFKPR	ALASNILYRFPDITPVNVVGHSDIAPGRK	ALMEYDESLRGELRK
AKHDLLLK	ALASPDM*IRSWSFGEVKKPETINYR	ALMGANMQR
AKHLFTSESVSEGHPDK	ALATFLFDSDDAM*VR	ALMHGYDDPVEFYIGR
AKHLFTSESVSEGHPDKIADQISDAVLDAILEQDPK	ALATFLFDSDDAMVR	ALMLAQPAIIK
AKIDMASPFIVMR	ALAVADTLATVGIPK	ALMMEPQVLLFDEPTAALDPEITAQIVSIIR
AKIDQLSSDVQTLNAK	ALAVALDADPVR	ALMMSTNNILSPANGEPIIVPSQDVVLGLYYMTR
AKIELSSAQQTDVNLPYITADGSGPK	ALAVDPEVLLMDEPFGALDPVTR	ALMQEALLAVVR
AKIFSEIGKK	ALDAIITSVTESLK	ALMSAVPIPDPDKER
AKISATGDDAR	ALDAIITSVTESLKEGDDVA	ALMTTVHATTATQK
AKISQFFE	ALDAIITSVTESLKEGDDVALVGFGTFAVR	ALNAAGFR
AKIVADFGR	ALDALLDYQDYPIAAAQR	ALNALHHIPEEITAHR
AKKDLDLAQANATDQLKK	ALDAQTQDFAAR	ALNDEQLAK
AKKEM*VEANLR	ALDAYYALQQK	ALNFTTAQILDLFFEK
AKKPVNFEPDSAFRPDAAAAKPDDK	ALDDHTLEVTLSEPVPYLDK	ALNGYDDVAAETR
AKKVDAIISSLSITEK	ALDEVAANDALPSSVR	ALNNIGYK
AKKVDAIISSLSITEKR	ALDFLLEQGFIHR	ALNNIGYKDILVVDNLK
AKLEAAAAEIK	ALDGAHEVLAPEGR	ALNNIGYKDILVVDNLKDGTK
AKLEAAAAEIKSGK	ALDHLSIRPIEAINLVR	ALNQYQQTK
AKLESLVEDLVN	ALDILTATPPDVFNHNLENVPR	ALNTGSVGDEAATTEADDAIASAAAR
AKLESLVEDLVNR	ALDLTAEDK	ALNYLIHQLESDIVTMDYR
AKLHDYYKDEVVK	ALDPLTGPQPYQGR	ALPAAVAGQTLPSLAPMLEK
AKLYEFEM*QKK	ALDQHTIDGFVYR	ALPAGTSWVEK
AKLYEFEMQKK	ALDQTGFKR	ALPAIADAVKGDITILADSGIR
AKNFEEAVEKAEK	ALDREHFISVVGADQEDAQMLAQELR	ALPDPALLEYTQVIIEQADR
AKNHQVIGVSESYSSPTAAK	ALDTADKTNTELTSM*IEGVELTLK	ALPFDEINEQLYLLLNR
AKNHQVIGVSESYSSPTAAKNGIASVMK	ALDTADKTNTELTSMIEGVELTLK	ALPFIGDGLKPVQR
AKNPTIKIETLVPDFR	ALEDM*GFYCVDNLPVVLLPQLASTLADR	ALPLLGSGKPDFVTLGK
AKPAVATPAAVSTDVEQPGFFSR	ALEDMKSPEMVAAK	ALPVGTLLAELVYVVEAQAPK
AKPGQSFFPLTVNYQER	ALEEAHPDVELYTASIDQGLNEHGYIIPGLGDAGDK	ALPVYGPLLPAVVTEADAAQATAMLADGSNVTLPMVGIR
AKPLPAVEDR	ALEEAHPDVELYTASIDQGLNEHGYIIPGLGDAGDKIFGTK	ALQAIGGPF
AKPLPAVEDRK	ALEEANIPVREEWIVQGDFEPESGYK	ALQAIGGPFSQVR
AKPSENNPVEYFSSIKPALFK	ALEELDDEYLKER	ALQDASGYIR
AKPVLLEPIM*K	ALEGDAEWEAK	ALQEFVIDKLDDLK
AKPVLLEPIMK	ALEGEAEWEAK	ALQEFVIDKLDDLKGQDIIALDVQGK
AKPVLLEPIMKVEVETPEDYMGDVMGDLNR	ALEHVTAAVYEVMLK	ALQEVHEK
AKQDLGYGM*LLKR	ALEIEEMQLK	ALQGESNVVECSYVEGDGK
AKQDLGYGMLLK	ALEIISELAAK	ALQHDYLAQK
AKQDLGYGMLLKR	ALEKRPVSSDDVETAISHIK	ALQHDYLAQKR
AKQGLLEGLHR	ALEMIDMHGGDLFSEE	ALQLIANNPLR
AKQIASGVDGVTEVYNEM*R	ALENGEQVK	ALQNVDLIR
AKQIASGVDGVTEVYNEMR	ALENMLDVLHKDIELGEK	ALQQHFEQM*KDVTISSLFAK
AKQPASQLVGLQYNTCCWAVNLGYER	ALESAENQQASLTR	ALQQHFEQMK
AKQPWQQGAVLVSSR	ALESAIAIIHYVAGDLK	ALQQHFEQMKDVTISSLFAK
AKRHEAWLMLEK	ALESLWDTWQEMQEPENR	ALRALEDM*GFYCVDNLPVVLLPQLASTLADR
AKRPLAAAEVQVEDVEDDPGFYR	ALESLWDTWQEMQEPENRR	ALRDYGITAPIDVHLM*VKPVDR
AKSDVFHLGLTK	ALESTLAAITESLK	ALRDYGITAPIDVHLMVKPVDR
AKSFLDGVKK	ALESTLAAITESLKEGDPVQLVGFGTFK	ALRPDEDRLSAIHSVYVDQWDWER
AKSLGLTPR	ALETEEIPGIINDFR	ALRPLPDKFHGLADQETR
AKSTLTPVVISNMDEIK	ALFATGNFEDVR	ALSADYNK
AKSTLTPVVISNMDEIKELIK	ALFGADYANVQPHSGSQAN	ALSDALEIPLDQLATR
AKTDPSLGIAYPK	ALFGETLPQQPTFVQAVTEAYLSLQQFGAK	ALSFGINLR
AKTVYTTENPDLLVLEFR	ALFGHLGHVGSSM*VR	ALSHTLLM*FDNFYDVEDK
AKVDQLSNDVNAVR	ALFGHLGHVGSSMVR	ALSHTLLMFDNFYDVEDK
AKVGMVFQKPTPFPMSIYDNIAFGVK	ALFNLLSEEEHQR	ALSHTLLMFDNFYDVEDKAK
AKVGNLYVNR	ALFPSAFEDVNPQHNLETFYEEYLPIK	ALSLMDLTTLNDDDTDEK
AKVTEKPTTFSELM*NQTTAA	ALFQLDPER	ALSLVIEAPAVALPFIER
AKVTEKPTTFSELMNQTTAA	ALFSHPQHDR	ALSM*DAVQK
AKYPNLQIVGGNVATGAGAK	ALGANLVLTEGAK	ALSMDAVQK
ALAAALGQIEK	ALGAPVPEYAHVSMILGDDGKK	ALSNPELFEGDGELR
ALAAAPGVAVAEGWQDISQPSLDLVYEASTLDSTLER	ALGASSILVLPIEK	ALSQFMLDLHTEK
ALAAGGHLDPNKTGVHLGPYNDK	ALGDFINASR	ALSSAPSSHYTLQLSSASR
ALADAGVSAVK	ALGFNSTNIDLIYGLPK	ALSTQAIDEILNNK
ALADYQNLLTR	ALGFSGVQNFPTVGLIDGNFR	ALSVEVSDLTR
ALAEHGIVFGEPK	ALGGASGGYTAGR	ALSVGDTMPER
ALAESSPLAR	ALGGASGGYTAGRK	ALSVMEIVELISAMEEK
ALAIDAIINQR	ALGIFEHVKLELNSIGSLAAR	ALSVSEIKDIVQDYVQAAENAIR
ALAINLVDPAAAPVVIDK	ALGISQESVAHELGVGQSAVNQFLNGVNPLNITNAAAFAK	ALSWVAMLR
ALALLDQAIEIEQLFLHDLGALR	ALGLPPLGYLR	ALSYNNIADTDAALECVKEFSEPACVIVK
ALALLEHQLR	ALGLQNTHFK	ALTANALVGFSTCISESSCFGPDR
ALAMQPQVILFDEPTSALDPELVGEVLSTIR	ALGLSNTHFMTVHGLDSPGQYSTAR	ALTDETGTTIEIEDDGTIK
ALANGADAIWITLQLSK	ALGM*NDELAHSSIR	ALTDFM*ADFER
ALAQFNPHVIFLSYPFGGFNQTAVNAAK	ALGMAVVALGGGR	ALTDFMADFER
ALAQIKEM*AAK	ALGMNDELAHSSIR	ALTDIAGSSAYFDR
ALAQIKEMAAK	ALGNPARPM*VAIVGGSK	ALTELSQNAGYPVEQTLSGSGDLGQVLVDAIK
ALAQQFIEFINQPQYVK	ALGNPARPMVAIVGGSK	ALTKAEMSEHLFEK
ALAQRPVLMLLDEPFSALDTALR	ALGQAGDVLLAISTR	ALTNMVVNAAR
ALASLVDQTAETK	ALGTAQVINDKTPLK	ALTNSEQNK
ALASLVDQTAETKR	ALGTVTVTETAYGLLFTPHLTGLAPGIHGFH	ALTQLEGAELRPQDIILPEFEIEATLGDEVLDGSLDDISK
ALASNILYR	ALGVGEVK	ALVDDEPTESELADDELLAQGVTQR
ALASNILYRFPDITPVNVVGHSDIAPGR	ALGVTFFLPEGDAISASR	ALVDLGTLPLGR
ALASNILYRFPDITPVNVVGHSDIAPGRK	ALHAESGGTHYK	ALVEAFQHDSDVLIEK
ALATFLFDSDDAM*VR	ALHEIYFPGFEYAMEK	ALVEANGDIELAIDNM*R
ALATFLFDSDDAMVR	ALHFGAGNIGR	ALVEANGDIELAIDNMR
ALAVADTLATVGIPK	ALHSNFNR	ALVEANGDIELAIDNMRK
ALAVALDADPVR	ALIADAIVR	ALVEHDPAHAETYNR
ALAVDPEVLLMDEPFGALDPVTR	ALIANELEQHVWPLLSEGK	ALVGFQGTGR
ALDAHKIGIPYPQM*DVHLHQVAK	ALIATPSISAADSALDQSNEALINLLAGWFADLGFR	ALVGIFLNDQYVK
ALDAIITSVTESLK	ALIEEM*ASAYEDPQEVIEFYS	ALVGNSGNSLFFVDKDLK
ALDAIITSVTESLKEGDDVALVGFGTFAVR	ALIEEM*ASAYEDPQEVIEFYSK	ALVNEGYGDAQR
ALDALLDYQDYPIAAAQR	ALIEEMASAYEDPQEVIEFYS	ALVNQPPIIFADEPTGNLDEENEQR
ALDAQTQDFAAR	ALIEEMASAYEDPQEVIEFYSK	ALVPMVVEQTSR
ALDAVEDGFGETLLSR	ALIEMINDELETFTNGAVFDLMNEAK	ALVPSGHGHTLVK
ALDAYYALQQK	ALIGFAGPR	ALVSYPPILLSEVDKLVAAMSDALPMQQR
ALDEVAANDALPSSVR	ALIGIITNPVNTTVAIAAEVLK	ALYDAGIGAWYDDETK
ALDFLLEQGFIHR	ALILEQIEGR	ALYDAGIGAWYDDETKQR
ALDHLSIRPIEAINLVR	ALINAELAELALK	ALYPDAAVLVHPESPQAVVDMADAVGSTSQLIQAAK
ALDILTATPPDVFNHNLENVPR	ALINAELAELALKNEWEGIVVYGAVR	ALYSALDDIPDALPALMK
ALDPLTGPQPYQGR	ALIPDDAHLHHWLDMAR	ALYSWLFSR
ALDQTGFKRLVIAGGVSANQTLRLKLADMMQK	ALISTNDQGVTIHLTSHDQLGGIQR	ALYTGM*LNESGGVIDDLIVYFLSEDYFR
ALDREHFISVVGADQEDAQMLAQELR	ALIVGEPTFGK	ALYTGMLNESGGVIDDLIVYFLSEDYFR
ALDTADKTNTELISM*IEGVELTLK	ALKDPENYNVR	ALYWLAGNASR
ALDTADKTNTELISMIEGVELTLK	ALKPAIVVPGHFLDNAPQTLESVTFTQNYLTTLNAEIPK	AM*ASGVSACLATPFK
ALDVEQIRAQLEKVLLAEQITSDARALQLLAR	ALKYDPDKGEPLLAEAQR	AM*EM*VAASK
ALEDM*GFYCVDNLPVVLLPQLASTLADR	ALLAAFKFPFR	AM*EMVAASK
ALEDMKSPEMVAAK	ALLAAFKFPFRK	AM*EQEVVR
ALEEAHPDVELYTASIDQGLNEHGYIIPGLGDAGDK	ALLAALESVGEVK	AM*EQEVVRQEEHIELIASENYTSPR
ALEEANIPVREEWIVQGDFEPESGYK	ALLDGLSPLPSADPQVR	AM*ESGPANGSALDAQTR
ALEEFHKQHPNINVK	ALLDKTIATAQTTGVAEK	AM*GDDSQTPPTNVDK
ALEELDDEYLKER	ALLDTLLR	AM*GIPSSMFTVIFAIAR
ALEGDAEWEAK	ALLDTLLRR	AM*GLPLLVVSGVEADDVIGTLAR
ALEGEAEWEAK	ALLEFDQQEPALQAEIK	AM*HANGINTNASKQEK
ALEHVTAAVYEVMLK	ALLENTELGAR	AM*HQILTQK
ALEIEEMQLK	ALLESMPEPVFSIDLK	AM*INVALNNGTLQ
ALEIISELAAK	ALLFVENR	AM*INVALNNGTLQHPVKGAHTGSR
ALEKRPVSSDDVETAISHIK	ALLHSAPLWLLDEPTEGLDAETEQQILALLR	AM*LATLNVGPTLD
ALEMIDMHGGDLFSEE	ALLIALEPQLEPK	AM*LGSQSGMK
ALENGEQVK	ALLKDKEISEDEDRR	AM*LQDIATLTAGTVISEEIGLELEK
ALENMLDVLHKDIELGEK	ALLLAALAEGTTQLN	AM*LQDIATLTAGTVISEEIGLELEKTTLEDLGQAK
ALESAENQQASLTR	ALLLAALAEGTTQLNNVLDSDDIR	AM*LQDIATLTAGTVISEEIGLELEKTTLEDLGQAKR
ALESAIAIIHYVAGDLK	ALLLDAEILILDDALSAVDGQTEHEILK	AMAELLQNNKEDH
ALESLWDTWQEMQEPENR	ALLLKEDEIVINR	AMAENQYYGTGR
ALESTLAAITESLK	ALLNNLIYQPTLQEEDLGNK	AMAGLLDGIEQQK
ALESTLAAITESLKEGDPVQLVGFGTFK	ALLNNLIYQPTLQEEDLGNKEVVTQWIDSLVVLLNEK	AMANNPDILLMDEAFSALDPLIR
ALETEEIPGIINDFR	ALLNSM*VIGVTEGFTK	AMAVLDPIKVVIENR
ALETLTYTNKK	ALLNSMVIGVTEGFTK	AMDADTGKQIWQTDLSEK
ALEWGVTGAGLR	ALLNSMVIGVTEGFTKK	AMDLYQEALEALDELAK
ALFAKPLLPALPDFR	ALLPQLPTEVQSR	AMEEAGVFLVTQEPMIIDKMTTAENLMLGIWPT
ALFATGNFEDVR	ALLPTLQAVAELGLLPEQQVADLSGSYLFLR	AMEETDPGSAGQFWLNAANLYSIASYPHLK
ALFGETLPQQPTFVQAVTEAYLSLQQFGAK	ALLQISEPGLTAAPHQR	AMEIVYDEIDLR
ALFGHLGHVGSSM*VR	ALLQLETLTQLLPEFTK	AMEIVYDEIDLRR
ALFGHLGHVGSSMVR	ALLQTSEWLEDK	AMEM*VAASK
ALFNLLSEEEHQR	ALLSMAIQAAK	AMEMVAASK
ALFPSAFEDVNPQHNLETFYEEYLPIK	ALLSRPAINASER	AMEQEVVR
ALFSHPQHDR	ALLSVSDK	AMEQEVVRQEEHIELIASENYTSPR
ALFTIASWESGPHDINFLTIAALDKPLSELQK	ALLTAPELLLMDEPLASLDLPR	AMESGPANGSALDAQTR
ALGANLVLTEGAK	ALLTAQINHLQGHFSEHKK	AMFAGDILDNSDGFVGDLAYLYR
ALGAPVPEYAHVSMILGDDGKK	ALLVIENAK	AMFNFNYEVLDPYVVRPVAVVWR
ALGASSILVLPIEK	ALM*AEGDKAIEGTKR	AMGDDSQTPPTNVDK
ALGFNSTNIDLIYGLPK	ALM*GANM*QR	AMGDDSQTPPTNVDKTSNDADFAK
ALGFSGVQNFPTVGLIDGNFR	ALM*GANMQR	AMGIPSSMFTVIFAIAR
ALGGASGGYTAGR	ALM*M*STNNILSPANGEPIIVPSQDVVLGLYYM*TR	AMGIPTVMGADIQPALLSQR
ALGGASGGYTAGRK	ALM*M*STNNILSPANGEPIIVPSQDVVLGLYYMTR	AMGLPLLVVSGVEADDVIGTLAR
ALGIFEHVKLELNSIGSLAAR	ALMAEGDKAIEGTK	AMHQILTQK
ALGISQESVAHELGVGQSAVNQFLNGVNPLNITNAAAFAK	ALMAEGDKAIEGTKR	AMHQILTQKHRPTAVFCGGDIMAM*GAICAADELGLR
ALGLPPLGYLR	ALMASGEKPFDWGGAETLAYATLVDEGIPIR	AMIAVDGWLQQEPEPLVR
ALGLQNTHFK	ALMEYDESLR	AMIHGWVYGIENGLLR
ALGLSNTHFMTVHGLDSPGQYSTAR	ALMEYDESLRGELR	AMINVALNNGTLQ
ALGM*NDELAHSSIR	ALMEYDESLRGELRK	AMINVALNNGTLQHPVK
ALGMNDELAHSSIR	ALMGANM*QR	AMINVALNNGTLQHPVKGAHTGSR
ALGNPARPM*VAIVGGSK	ALMGANMQR	AMISYSTGNSGAGSDVEK
ALGNPARPMVAIVGGSK	ALMHGYDDPVEFYIGR	AMITAEVR
ALGTAQVINDKTPLK	ALMLAQPAIIK	AMITGQQAEKPQEEITVQLAER
ALGTVTVTETAYGLLFTPHLTGLAPGIHGFH	ALMMEPQVLLFDEPTAALDPEITAQIVSIIR	AMLATLNVGPTLD
ALGVTFFLPEGDAISASR	ALMMSTNNILSPANGEPIIVPSQDVVLGLYYM*TR	AMLATLNVGPTLDDK
ALHAESGGTHYK	ALMMSTNNILSPANGEPIIVPSQDVVLGLYYMTR	AMLGSQSGM*K
ALHEIYFPGFEYAMEK	ALMQEALLAVVR	AMLGSQSGMK
ALIADAIVR	ALMTTVHATTATQK	AMLPEVRPSSEIYGK
ALIANELEQHVWPLLSEGK	ALNAAGFR	AMLQDIATLTAGTVISEEIGLELEK
ALIATPSISAADSALDQSNEALINLLAGWFADLGFR	ALNAHEDQNQQQR	AMLQDIATLTAGTVISEEIGLELEKTTLEDLGQAK
ALIEEM*ASAYEDPQEVIEFYSK	ALNALHHIPEEITAHR	AMLQDIATLTAGTVISEEIGLELEKTTLEDLGQAKR
ALIEEMASAYEDPQEVIEFYS	ALNDEQLAK	AMLTNVHGIALDNWR
ALIEEMASAYEDPQEVIEFYSK	ALNFTTAQILDLFFEK	AMMDNLSVEDVVNR
ALIESLTLANR	ALNGYDDVAAETR	AMPFIDGTEVDYVR
ALIGFAGPR	ALNNIGYK	AMPVISFEGAVGQQLAVFR
ALIGIITNPVNTTVAIAAEVLK	ALNNIGYKDILVVDNLK	AMQIEKLESPDLLWLLQQTGDEILDYR
ALILEQIEGR	ALNNIGYKDILVVDNLKDGTK	AMQLIASNEGSR
ALILQPQLLILDEPTSSLDK	ALNNYVSATGLLATIEALHVAQR	AMQVAYGTTALR
ALILQPQLLILDEPTSSLDKSVQAQILALLK	ALNTGSVGDEAATTEADDAIASAAAR	AMSAADLLNSR
ALINAELAELALK	ALNYLIHQLESDIVTM*DYR	AMSAWGVEAR
ALINAELAELALKNEWEGIVVYGAVR	ALNYLIHQLESDIVTMDYR	AMSEHDIVPSEPVTIVLSEMGWVR
ALISTNDQGVTIHLTSHDQLGGIQR	ALPAAVAGQTLPSLAPMLEK	AMTDALPFPAELQNLTHF
ALITTLQIYLDETRPFMGK	ALPAHQALLGAYAK	AMTDSDEPALIR
ALIVGEPTFGK	ALPDPALLEYTQVIIEQADR	AMTDVHQFFQLLK
ALKAPDVKSDKPETQPAAPVPTAK	ALPEGTKM*TR	AMTDVHQFFQLLKR
ALKDPENYNVR	ALPFDEINEQLYLLLNR	AMVAVFLER
ALKPAIVVPGHFLDNAPQTLESVTFTQNYLTTLNAEIPK	ALPFIGDGLKPVQR	AMVIGTTGFDEAGK
ALKYDPDKGEPLLAEAQR	ALPLLGSGKPDFVTLGK	AMVPIGNYER
ALLAAELGCAR	ALPPEFSQMMQINIENGYK	AMVVEQFR
ALLAAFKFPFR	ALPQFTEEPAQL	ANALINYGYLNFL
ALLAAFKFPFRK	ALPQSERPWQK	ANASNYLK
ALLAGLGVATMPYEMVEK	ALPVGTLLAELVYVVEAQAPK	ANASNYLKENPAIAAELDKK
ALLAGLGVATMPYEMVEKDIAAGR	ALPVYGPLLPAVVTEADAAQATAMLADGSNVTLPMVGIR	ANAVIMATGGAGR
ALLDTLLR	ALQACMQNNFSVFR	ANDAAGDGTTTATVLAQ
ALLEFDQQEPALQAEIK	ALQAIGGPF	ANDAAGDGTTTATVLAQSIITEGLK
ALLENTELGAR	ALQAIGGPFSQVR	ANDIGLNTPGAVEAVTYLK
ALLESMPEPVFSIDLK	ALQDASGYIR	ANDLLFIGNNDEEEAPLTATSYPIIH
ALLFVENR	ALQEFVIDKLDDLK	ANDTVLSDVLTLEK
ALLHQQSDLLQDVAHLVK	ALQEFVIDKLDDLKGQDIIALDVQGK	ANDVVVELLR
ALLHSAPLWLLDEPTEGLDAETEQQILALLR	ALQEIYNGIM*APQTVAEEEVAPAEAVETAPVM*PTTAQ	ANELSDAAENKGSAVK
ALLIALEPQLEPK	ALQEVHEK	ANFGQYFSVENVLYR
ALLKDKEISEDEDRR	ALQHDYLAQK	ANGAEIDDAAINGIK
ALLKPGDTVLGMNLAHGGHLTHGSPVNFSGK	ALQHDYLAQKR	ANGDQKEFAPSEDPGVVSVTEIYQYYK
ALLLAALAEGTTQLN	ALQLIANNPLR	ANGLSQAEFDALMTQK
ALLLAALAEGTTQLNNVLDSDDIR	ALQNNAIEEFKR	ANGYQSLHTSLIGPHGVPVEVQIR
ALLLDAEILILDDALSAVDGQTEHEILK	ALQNVDLIR	ANGYSELEISQK
ALLLKEDEIVINR	ALQQAQSQLNR	ANHLGSIR
ALLNNLIYQPTLQEEDLGNK	ALQQHFEQM*KDVTISSLFAK	ANHVGDWGTQFGM*LIAYLEK
ALLNNLIYQPTLQEEDLGNKEVVTQWIDSLVVLLNEK	ALQQHFEQMK	ANHVGDWGTQFGMLIAYLEK
ALLNSM*VIGVTEGF	ALQQHFEQMKDVTISSLFAK	ANIGELSTK
ALLNSM*VIGVTEGFTK	ALRDYGITAPIDVHLMVKPVDR	ANIGFMQVVSR
ALLNSM*VIGVTEGFTKK	ALREEGYR	ANINIIAIAQGSSER
ALLNSMVIGVTEGF	ALRPDEDRLSAIHSVYVDQWDWER	ANISDSYVMFK
ALLNSMVIGVTEGFTK	ALRPIFSEFGLLK	ANISVHEPR
ALLNSMVIGVTEGFTKK	ALRPLPDKFHGLADQETR	ANITVNKNSVPNDPK
ALLPQLPTEVQSR	ALRQPSLVNDGHLNQR	ANKELHTIPR
ALLPTLQAVAELGLLPEQQVADLSGSYLFLR	ALRSSIVVNSASSRCPLR	ANKLELTVPEM*TVLIGGLR
ALLQLETLTQLLPEFTK	ALSADLQSQQSGSGR	ANKLELTVPEMTVLIGGLR
ALLQTSEWLEDK	ALSADYNKAEQIIAEQVPIAPIYQFTNGR	ANKPFTLGVVVK
ALLSMAIQAAK	ALSDLPPLLEYLGVSNNQLEK	ANLAGLMDGYFHHEASIEGGQHLNVNVMNR
ALLSRPAINASER	ALSDLPPLLEYLGVSNNQLEKLPELQNSSFLK	ANLDLASVTPELDM*YDR
ALLSVSDKAGIIEFAQALSQR	ALSFGINLR	ANLDLASVTPELDMYDR
ALLTAPELLLMDEPLASLDLPR	ALSHTLLM*FDNFYDVEDK	ANLEETGMGYGLEVEMIR
ALLVSHGVGQGR	ALSHTLLMFDNFYDVEDK	ANLFDPDIESDINQPLIDVAM*VNSTLVATLNQAK
ALM*GANM*QR	ALSHTLLMFDNFYDVEDKAK	ANLFDPDIESDINQPLIDVAMVNSTLVATLNQAK
ALM*M*STNNILSPANGEPIIVPSQDVVLGLYYM*TR	ALSIEEKPSQPK	ANLGSLGDQVNVK
ALM*M*STNNILSPANGEPIIVPSQDVVLGLYYMTR	ALSLVIEAPAVALPFIER	ANLILSAASFAESDGTLVNQEGR
ALMAEGDKAIEGTK	ALSM*DAVQK	ANLKPEGQQALDQLYAQLSSID
ALMAEGDKAIEGTKR	ALSMDAVQK	ANLKPEGQQALDQLYAQLSSIDPK
ALMASGEKPFDWGGAETLAYATLVDEGIPIR	ALSNPELFEGDGELR	ANLKPVLITGMEK
ALMEYDESLR	ALSPDHPVVR	ANLM*TQDR
ALMEYDESLRGELR	ALSQFM*LDLHTEK	ANMAGM*NDKASMNDK
ALMGANMQR	ALSQFMLDLHTEK	ANMAGMNDK
ALMHGYDDPVEFYIGR	ALSSAPSSHYTLQLSSASR	ANMLIGSSTEPEK
ALMLAQPAIIK	ALSTQAIDEILNNK	ANNEALLNSFWLLDDEK
ALMMEPQVLLFDEPTAALDPEITAQIVSIIR	ALSVEVSDLTR	ANNEALLNSFWLLDDEKAELR
ALMMSTNNILSPANGEPIIVPSQDVVLGLYYM*TR	ALSYAIDRK	ANNTPFGLAAYFYTQ
ALMMSTNNILSPANGEPIIVPSQDVVLGLYYMTR	ALSYNNIADTDAALECVKEFSEPACVIVK	ANNTPFGLAAYFYTQNLQR
ALMQEALLAVVR	ALTANALVGFSTCISESSCFGPDR	ANQGIMEFVEMFK
ALMTTVHATTATQK	ALTANALVGFSTCISESSCFGPDRK	ANQLLSQNLK
ALNAAGFR	ALTDETGTTIEIEDDGTIK	ANQM*KPHPTASSQDYLFAK
ALNFTTAQILDLF	ALTDFMADFER	ANQMKPHPTASSQDYLFAK
ALNFTTAQILDLFFEK	ALTDHLDTFAER	ANQRLDNQAQAYK
ALNFTTAQILDLFFEKVVFEIR	ALTDIAGSSAYFDR	ANQRLDNQAQAYKK
ALNGYDDVAAETR	ALTIGLIGNPNAGK	ANQTQYHFLSGFTAK
ALNHAIDLGIGR	ALTLVDLADADWILR	ANRLEELFVTLVNGHEGEKA
ALNMLHQAGVTSVGLMTQPI	ALTQIEDFNEVFNTHFSDDEVDTIGGLVMQAFGHLPAR	ANSFFQNTEYAATGYPDSAELAWLAPLKDK
ALNNIGYK	ALTQLEGAELRPQDIILPEFEIEATLGDEVLDGSLDDISK	ANSHAPEAVIDGASR
ALNNIGYKDILVVDNLK	ALTRLDEVYALYADPDADFDKLAK	ANSSGVDLANEHR
ALNNIGYKDILVVDNLKDGTK	ALTTFSGLPHR	ANSSITAAEPLNMNYVETLLSSNQQDVLMEEIVAR
ALNNYVSATGLLATIEALHVAQR	ALTTVNEFTDQLPALRPAVLLEVAHK	ANSTNAAPTPVR
ALNTGSVGDEAATTEADDAIASAAAR	ALTVGGAALAQLVDIDLSQLDDR	ANTLAGDPITAR
ALNYLIHQLESDIVTM*DYR	ALTVSETTFGR	ANTSSMNYYR
ALNYLIHQLESDIVTMDYR	ALVDDEPTESELADDELLAQGVTQR	ANVAIVGFSTPNVM
ALPAAVAGQTLPSLAPMLEK	ALVDDQAFTDWLCK	ANVPTGVQLAEK
ALPAIADAVK	ALVDLGTLPLGR	ANVSIPASAASETPVSTPD
ALPAIADAVKGDITILADSGIR	ALVEAFQHDSDVLIEK	ANVSQVMHIIGDVAGR
ALPFDEINEQLYLLLNR	ALVEANGDIELAIDNM*R	ANVSQVMHIIGDVAGRDCVLVDDMIDTGGTLCK
ALPFIGDGLKPVQR	ALVEANGDIELAIDNMR	ANVVEIYLVR
ALPLLGSGKPDFVTLGK	ALVEHDPAHAETYNR	ANYNLSSAVIDSILLLIER
ALPMMQQTEQMAR	ALVGAPDGSQMIR	ANYSNPPAHGASVVATILSNAALR
ALPPEFSQMMQINIENGYK	ALVGGFDFNQSK	APAAPNYPM*M*QQPY
ALPQFTEEPAQL	ALVGIFLNDQYVK	APAEIILDTGIGETFNAR
ALPQSERPWQK	ALVGNSGNSLFFVDK	APAEPQRYDAVLVAIGR
ALPQTGVVAWVGTTVSAPIQDIFAALAQVR	ALVGNSGNSLFFVDKDLK	APAPDYAPESPTK
ALPVGTLLAELVYVVEAQAPK	ALVHQVVVAYAAGAR	APATLTDWRPWLHEMR
ALPVYGPLLPAVVTEADAAQATAMLADGSNVTLPMVGIR	ALVNEGYGDAQR	APATQENLQTLSK
ALQAIGGPF	ALVNQPPIIFADEPTGNLDEENEQR	APATVENFLNYCR
ALQAIGGPFSQVR	ALVPMVVEQTSR	APAVALGPN
ALQDASGYIR	ALVSYPPILLSEVDKLVAAMSDALPMQQR	APAVALGPNDHM*K
ALQEFVIDKLDDLK	ALYDAGIGAWYDDETK	APAVALGPNDHMK
ALQEFVIDKLDDLKGQDIIALDVQGK	ALYDAGIGAWYDDETKQR	APDASFLWHLATHYAPVLSSEYADVLTQK
ALQEVHEKADKVR	ALYLANIAAEVHLIHR	APDHGALQPWR
ALQHDYLAQK	ALYPDAAVLVHPESPQAVVDMADAVGSTSQLIQAAK	APDILSNATSHAIGVLLPSLTNQVFAEVLR
ALQHDYLAQKR	ALYSALDDIPDALPALMK	APDSWSTLLAQWADR
ALQHIGSANNSK	ALYSWLFSR	APDVSVAEIHGVPVIYLR
ALQLIANNPLR	ALYTGM*LNESGGVIDDLIVYFLSEDYFR	APDVWTNNSFVR
ALQNVDLIR	ALYTGMLNESGGVIDDLIVYFLSEDYFR	APDYDDWTSPSAEGFSGLNGDIIVWNPILEDAFEISSM*GIR
ALQPEASNLLGGDYLVHGHHVTWQSAQHGDER	ALYWLAGNASR	APDYDDWTSPSAEGFSGLNGDIIVWNPILEDAFEISSMGIR
ALQQHFEQM*K	AM*AELLQNNKEDH	APDYTITDIDLDFALDAQK
ALQQHFEQM*KDVTISSLFAK	AM*DLYQEALEALDELAK	APEPSAEESPSK
ALQQHFEQMK	AM*EELHQAGK	APEVAEEQR
ALQQHFEQMKDVTISSLFAK	AM*EM*VAASK	APFFVGTK
ALRDYGITAPIDVHLMVKPVDR	AM*EMVAASK	APFIALNMAAIPK
ALRPDEDRLSAIHSVYVDQWDWER	AM*EQEVVR	APGALTVSETTFGR
ALRPLPDK	AM*EQEVVRQEEHIELIASENYTSPR	APGEAVYITEK
ALRPLPDKFHGLADQETR	AM*ESGPANGSALDAQTR	APGFGDRR
ALRQGPQVVVGTPGR	AM*GDDSQTPPTNVDK	APGLAVVLVGENPASQIYVASK
ALSADLQSQQSGSGR	AM*GIPSSMFTVIFAIAR	APIAMDDGLR
ALSADYNK	AM*HANGINTNASK	APIIIWPESAIPDIETDQNTFLTMIDGLM*R
ALSADYNKAEQIIAEQVPIAPIYQFTNGR	AM*HQILTQK	APIIIWPESAIPDIETDQNTFLTMIDGLMR
ALSDLPPLLEYLGVSNNQLEK	AM*IHGWVYGIENGLLR	APINWVLVNGETETGVTLHQMVK
ALSGPDLPLHVVGFSNGGALAMK	AM*INVALNNGTLQ	APISTQNFVDYVNNGYYNNTIFHR
ALSHTLLM*FDNFYDVEDK	AM*INVALNNGTLQHPVK	APITEYLQSNVVLLK
ALSHTLLMFDNFYDVEDK	AM*INVALNNGTLQHPVKGAHTGSR	APIVAAVPVVAETTAAETVVAK
ALSHTLLMFDNFYDVEDKAK	AM*LATLNVGPTLD	APKDNTWYTGGK
ALSIEEKPSQPK	AM*LATLNVGPTLDDKFQTYR	APKPGAELLLGDDESIR
ALSLMDLTTLNDDDTDEK	AM*LGSQSGM*K	APLEVSQASGALNWR
ALSLVIEAPAVALPFIER	AM*LQDIATLTAGTVISEEIGLELEK	APLIITVIAHVTENAK
ALSM*DAVQK	AM*LQDIATLTAGTVISEEIGLELEKTTLEDLGQAK	APLSGEIVNIEDVPDVVFAEK
ALSMDAVQK	AM*LTTLAQR	APLVEELVR
ALSNNMTR	AM*NPVDHPHGGGEGR	APMIPGHEFIGHVVGLGADVEGFELGDR
ALSNPELFEGDGELR	AM*VGQDHTNLR	APNVIGIGINGVDAVSELSK
ALSPDHPVVR	AMAAAEGQLGLPHPR	APQEAIDELETNFR
ALSQFM*LDLHTEK	AMAELLQNNKEDH	APQETEQDR
ALSQFMLDLHTEK	AMAENQYYGTGR	APQEVDKVAAVVDNGVVLQSDIDGLLQSVK
ALSSAPSSHYTLQLSSASR	AMAGLLDGIEQQK	APQMDYPVMAQDVLALMDELAITQAIIIGHSM*GGK
ALSVEVSDLTR	AMAIAESVPEKVEFMWDDYHR	APQMDYPVMAQDVLALMDELAITQAIIIGHSMGGK
ALSVMEIVELISAMEEK	AMANNPDILLMDEAFSALDPLIR	APQSYPVQAMATITTHDLPTLR
ALSYAIDRK	AMAVLDPIKVVIENR	APSDHLDHQLAQLLQVPSATR
ALSYNNIADTDAALECVKEFSEPACVIVK	AMDLYQEALEALDELAK	APSEEPEFDHGGISGK
ALTANALVGFSTCISESSCFGPDR	AMEELHQAGK	APSIMQVPGAK
ALTDETGTTIEIEDDGTIK	AMEETDPGSAGQFWLNAANLYSIASYPHLK	APTPAPAPIVDTK
ALTDFMADFER	AMEIVYDEIDLRR	APVALLDFAASAR
ALTKAEMSEHLFEK	AMEM*VAASK	APVDGTIGK
ALTLVDLADADWILR	AMEMVAASK	APVGQAYVVQLGALK
ALTNMVVNAAR	AMEQEVVR	APVIIQFSNGGAA
ALTQLEGAELRPQDIILPEFEIEATLGDEVLDGSLDDISK	AMEQEVVRQEEHIELIASENYTSPR	APVIIQFSNGGAAF
ALTTDSVSSIFAGLVGAAPAAVYIESAAGTAAGGK	AMESGPANGSALDAQTR	APVIIQFSNGGAAFIAGK
ALTTVNEFTDQLPALRPAVLLEVAHK	AMFAGDILDNSDGFVGDLAYLYR	APVMLAYSAR
ALTVSETTFGR	AMFNFNYEVLDPYVVRPVAVVWR	APVVIPAGVEVK
ALVDDEPTESELADDELLAQGVTQR	AMGDDSQTPPTNVDK	APVVTIM*GHVDHGK
ALVEAFQHDSDVLIEK	AMGDDSQTPPTNVDKTSNDADFAK	APVVTIMGHVDHGK
ALVEANGDIELAIDNM*R	AMGIPSSMFTVIFAIAR	APVWLAAQDALSQLSEQSGEALEDSR
ALVEANGDIELAIDNMR	AMGLPLLVVSGVEADDVIGTLAR	APVYEVAQVTPLQVMEK
ALVEANGDIELAIDNMRK	AMHQILTQK	APWFHHQEGK
ALVGAPDGSQMIR	AMIAVDGWLQQEPEPLVR	APWPSSEAELNALWDAK
ALVGIFLNDQYVK	AMIEAGAAGVHFEDQLAAVKK	APYAVIGEATEEK
ALVGNSGNSLFFVDK	AMIHGWVYGIENGLLR	APYAVIGEATEEKHLLLNDR
ALVGNSGNSLFFVDKDLK	AMINVALNNGTLQ	APYAVVWER
ALVHQVVVAYAAGAR	AMINVALNNGTLQHPVK	APYAVVWERLPAALEK
ALVNEGYGDAQR	AMINVALNNGTLQHPVKGAHTGSR	AQADSAQAALK
ALVNQPPIIFADEPTGNLDEENEQR	AMITGQQAEKPQEEITVQLAER	AQADSAQAALKLPDDLK
ALVPMVVEQTSR	AMLAGQVPALELGGILIAFR	AQAFEQDNR
ALVYNPPVILLDEPLSNLDAK	AMLATLNVGPTLD	AQAIELLEQLGLGKR
ALYDAGIGAWYDDETK	AMLATLNVGPTLDDK	AQALGFSAENINPQPVLD
ALYDAGIGAWYDDETKQR	AMLATLNVGPTLDDKFQTYR	AQALGFSAENINPQPVLDYLHYYR
ALYLGKIVSYAQGFSQLK	AMLGSQSGM*K	AQALGVAISDINTTLGSAMGGSYVNDFIDR
ALYPDAAVLVHPESPQAVVDMADAVGSTSQLIQAAK	AMLGSQSGMK	AQALSGFTLGELATR
ALYQVVTEGVVGETYNIGGHNER	AMLGSQSGMKK	AQAQLLLDVYQHTLPASAESLWLQIR
ALYSALDDIPDALPALMK	AMLPEVRPSSEIYGK	AQASAQIAHLTVNR
ALYTGM*LNESGGVIDDLIVYFLSEDYFR	AMLQDIATLTAGTVISEEIGLELEK	AQAVGAAESLVTFLSSEGEAIGQGEK
ALYTGMLNESGGVIDDLIVYFLSEDYFR	AMLQDIATLTAGTVISEEIGLELEKTTLEDLGQAK	AQDFLVFGNAYLELR
ALYWLAGNASR	AMLQDIATLTAGTVISEEIGLELEKTTLEDLGQAKR	AQDNKSLGQFNLDGIQPAPR
AM*ASGVSACLATPFK	AMLTNVHGIALDNWR	AQDYPHMLVTTGLHDSQVQYWEPAK
AM*DLYQEALEALDELAK	AMLTTLAQR	AQDYTVEQLNYGR
AM*EM*VAASK	AMMDNLSVEDVVNR	AQEGGVAEIDEK
AM*EQEVVRQEEHIELIASENYTSPR	AMPLLIGGSKPAEAQEK	AQESTDYLALIAQAVK
AM*ESGPANGSALDAQTR	AMRDAVAIPVTVKTR	AQETQGKPTVILAHTIK
AM*FNFNYEVLDPYVVRPVAVVWR	AMSAADLLNSR	AQEVLDTDHYGLER
AM*GDDSQTPPTNVDK	AMSAWGVEAR	AQFAAVPLNLLGDSNSADYIDGGYWAHSAVK
AM*GIPSSMFTVIFAIAR	AMSEHDIVPSEPVTIVLSEMGWVR	AQFTDAAVK
AM*HANGINTNASK	AMTDSDEPALIR	AQGAEIISVPAAFTK
AM*HQILTQK	AMTDVHQFFQLLK	AQGEAPVVPQVSADEATANLAELLNAGFGNNK
AM*IEAGAAGVHFEDQLAAVK	AMTYHLDVVSAEK	AQGEAPVVPQVSADEATANLAELLNAGFGNNKG
AM*IHGWVYGIENGLLR	AMVAVFLER	AQGFDLQLIGR
AM*INVALNNGTLQ	AMVDNLHPLNIK	AQGINETLFMALITLDAQESR
AM*INVALNNGTLQHPVK	AMVGQDHTNLR	AQGVQLAAK
AM*INVALNNGTLQHPVKGAHTGSR	AMVVEQFR	AQHEPALVINAAK
AM*LAGQVPALELGGILIAFR	ANAFNAATQPLGQM*AN	AQIAENPLILVDGSSYLYR
AM*LATLNVGPTLD	ANAFNAATQPLGQMANSAIQVHQGYSQAEVK	AQIASADSQYGK
AM*LATLNVGPTLDDKFQTYR	ANAFVHHMVR	AQIASADSQYGKR
AM*LGSQSGM*K	ANALINYGYLNFL	AQIDGLEGYPVYTR
AM*LQDIATLTAGTVISEEIGLELEK	ANASNYLK	AQIKPLATGIHPDR
AM*LQDIATLTAGTVISEEIGLELEKTTLEDLGQAK	ANASNYLKENPAIAAELDKK	AQILDEAKAEAEQER
AM*LQDIATLTAGTVISEEIGLELEKTTLEDLGQAKR	ANAVIM*ATGGAGR	AQINHLQGHFSEHKK
AM*LTTLAQR	ANAVIMATGGAGR	AQISELQSFVSR
AM*NPVDHPHGGGEGR	ANDAAGDGTTTATVL	AQIVGMDTGSLK
AM*VAINHAQALLTDLK	ANDAAGDGTTTATVLAQ	AQLEQAGYR
AM*VAVFLER	ANDAAGDGTTTATVLAQSIITEGLK	AQLEQAM*QSER
AM*VGQDHTNLR	ANDAAGDGTTTATVLAQSIITEGLKAVAAGMNPMDLK	AQLEQAMQSER
AMAELLQNNKEDH	ANDIGLNTPGAVEAVTYLK	AQLLADLNDLDVLNDEELLNR
AMAENQYYGTGR	ANDKLETFQNR	AQLLADLNDLDVLNDEELLNRR
AMAGLLDGIEQQK	ANDLLFIGNNDEEEAPLTATSYPIIH	AQLLDSDGLVR
AMANAKALGLDLSTVIR	ANDTVLSDVLTLEK	AQLNDTPDINVDLAENELDDILK
AMANNPDILLMDEAFSALDPLIR	ANDVVVELLR	AQLNDTPDINVDLAENELDDILKR
AMASGVSACLATPFK	ANELSDAAENK	AQLPLLSHDLPADFAQM*R
AMAVLDPIKVVIENR	ANELSDAAENKGSAVK	AQLPLLSHDLPADFAQMR
AMDADTGKQIWQTDLSEK	ANFGQYFSVENVLFR	AQLVSNNAQGAALGAIQWVK
AMDLYQEALEALDELAK	ANGAEIDDAAINGIK	AQNSHHHPIVFR
AMEETDPGSAGQFWLNAANLYSIASYPHLK	ANGDQKEFAPSEDPGVVSVTEIYQYYK	AQPDETYSDSANVR
AMEM*VAASK	ANGLQALAQGVQTIAAK	AQPQIASRPVAAATATAGATVK
AMEMVAASK	ANGLSQAEFDALMTQK	AQPWSPFIAGNDKKPDHPVK
AMEQEVVR	ANGLVKDVFETR	AQQAFHDASFLLRPAHQK
AMEQEVVRQEEHIELIASENYTSPR	ANGVEHLQAHDAMSDVYATIAMAK	AQQDYGSDNIPLSSGR
AMESGPANGSALDAQTR	ANGVIKDEDPSVAGLNMALELPHEMK	AQQLEQFYAVIDK
AMFAGDILDNSDGFVGDLAYLYR	ANGYQSLHTSLIGPHGVPVEVQIR	AQQNAITLMEEIAANFSYEAVR
AMFNFNYEVLDPYVVRPVAVVWR	ANHLGSIR	AQQQQAAAGGDAGDTSAK
AMGDDSQTPPTNVDK	ANHSSLITGIVDAK	AQQTGWFTR
AMGDDSQTPPTNVDKTSNDADFAK	ANHVGDWGTQFGM*LIAYLEK	AQQYGVAFPQGSDLR
AMGDPNASLPTPQPVFYRPMFGAMGK	ANHVGDWGTQFGMLIAYLEK	AQQYGVAFPQGSDLREK
AMGIPSSMFTVIFAIAR	ANIGELSTK	AQSAHQMASR
AMGIPTVMGADIQPALLSQR	ANKELHTIPR	AQSGNLEGMNVLLRPISADVLENLINTAASSFVYR
AMGLPLLVVSGVEADDVIGTLAR	ANKLELTVPEM*TVLIGGLR	AQSHDIGLTIVGPEAPLVIGVVDAFR
AMHANGINTNASKQEK	ANKLELTVPEMTVLIGGLR	AQSLSTLCGAQVVLAISAMQHDCLSVALHTPER
AMHQILTQK	ANKLPNADSAVTNDPMEATWVGMHMWAQAVEK	AQSM*DALSSMANIAGYR
AMIEAGAAGVHFEDQLAAVK	ANKPFTLGVVVK	AQSMDALSSMANIAGYR
AMIEAGAAGVHFEDQLAAVKK	ANLAGLMDGYFHHEASIEGGQHLNVNVMNR	AQSPVGATGLMQVMPR
AMIHGWVYGIENGLLR	ANLDLASVTPELDMYDR	AQSVTLDYHSK
AMINVALNNGTLQ	ANLEETGMGYGLEVEMIR	AQTIAFDDFITYK
AMINVALNNGTLQHPVK	ANLFDPDIESDINQPLIDVAM*VNSTLVATLNQAK	AQTIDAQNLVPGDIVTLRPGDKIPADLR
AMINVALNNGTLQHPVKGAHTGSR	ANLFDPDIESDINQPLIDVAMVNSTLVATLNQAK	AQTILDLGQQFNLNLPANELDTLRPHVQITK
AMITAEVR	ANLGSLGDQVNVK	AQTKTEEFDAIK
AMITGQQAEKPQEEITVQLAER	ANLILSAASFAESDGTLVNQEGR	AQTLADEQLADEQLIAGEQLIAGQQLIAGQQLINKK
AMKVDAQK	ANLKPEGQQALDQLYAQLSSID	AQTWQQSLSQR
AMLAGQVPALELGGILIAFR	ANLKPEGQQALDQLYAQLSSIDPK	AQVGDVAAQVLLLLSR
AMLAIALVNNPR	ANLKPEGQQALDQLYAQLSSIDPKDGSVVVLGFADR	AQVGIFVGTVYGNALLVAEEAENILK
AMLATLNVGPTLD	ANLKPVLITGMEK	AQVGIFVGTVYGNALLVAEEAENILKDQGHEVK
AMLATLNVGPTLDDK	ANLNSAYAAGVK	AQVIVEAVVENPK
AMLATLNVGPTLDDKFQTYR	ANM*LAATTK	AQWQAEVEQMR
AMLGSQSGM*KK	ANMAGMNDK	AQWQEKAEDLAK
AMLGSQSGMK	ANMLAATTK	AQYEILPGKEK
AMLGSQSGMKK	ANMLIGSSTEPEKLVIDFR	AQYLIAKYPDTVE
AMLQDIATLTAGTVISEEIGLELEK	ANNATQTYNNHYQNGTHTK	AQYLIDQVLGEAR
AMLQDIATLTAGTVISEEIGLELEKTTLEDLGQAK	ANNAYYNSLVMIDADGSVLDVYRK	AQYNAITGGPAYR
AMLQDIATLTAGTVISEEIGLELEKTTLEDLGQAKR	ANNEALLNSFWLLDDEK	AQYVLAENVTGMVHGPEGLAAAK
AMLTNVHGIALDNWR	ANNEALLNSFWLLDDEKAELR	AQYVLAENVTGMVHGPEGLAAAKR
AMLTTLAQR	ANNTPFGLAAYFYTQ	ARADKLGINPDFYEKR
AMMDNLSVEDVVNR	ANNTPFGLAAYFYTQNLQR	ARCVVASATVGRSALR
AMMLPFQAPEPEIFR	ANPNLTGIITGLK	ARDANLQVVTNK
AMPFIDGTEVDYVR	ANPTLPINEFHAITVK	ARDDLQAVMALVR
AMPLLIGGSKPAEAQEK	ANQGIM*EFVEMFK	ARDEALHLTGTQHILNLMR
AMPVISFEGAVGQQLAVFR	ANQGIMEFVEM*FK	ARDPDAAQAAAER
AMQIEKLESPDLLWLLQQTGDEILDYR	ANQGIMEFVEMFK	ARDVAAQVIAK
AMSAADLLNSR	ANQLDLDGDEM*EEGM*NYYDEESLCLCGLEDFLLVLK	ARDVEPIQTALDK
AMSAWGVEAR	ANQLLSQNLK	ARDVEPIQTALDKLK
AMSEHDIVPSEPVTIVLSEMGWVR	ANQM*KPHPTASSQDYLFAK	ARESLGLPVSDVFR
AMTDVHQFFQLLK	ANQMKPHPTASSQDYLFAK	AREVPAAIQK
AMVAINHAQALLTDLK	ANQRLDNQAQAYK	ARFPDLDAK
AMVAVFLER	ANQRLDNQAQAYKK	ARGEDIEPLR
AMVVEQFR	ANQTQYHFLSGFTAK	ARGEDIEPLRLEVNALGEK
AMWLQTAAGREHLPVGNK	ANRLEELFVTLVNGHEGEKA	ARGEDIEPLRLEVNALGEKLDAAK
ANAFNAATQPLGQM*AN	ANSFFQNTEYAATGYPDSAELAWLAPLKDK	ARGELDRIEQESLAFFER
ANAFNAATQPLGQMANSAIQVHQGYSQAEVK	ANSHAPEAVIDGASR	ARHPAIGAGVQQSQQTANYYAFSR
ANAFVHHMVR	ANSSGVDLANEHR	ARLDEGIRPDALLVPQQGVTR
ANALINYGYLNFL	ANTILAANSVK	ARLHPRSGYR
ANASNYLK	ANTLAGDPITAR	ARLPATDGQVK
ANASNYLKENPAIAAELDK	ANTSSM*NYYR	ARLPSSQLEQAR
ANASNYLKENPAIAAELDKK	ANTSSMNYYR	ARNDAISYLSSR
ANAVIMATGGAGR	ANVAIVGFSTPNVM*	ARPDSQINK
ANDAAGDGTTTATVL	ANVAIVGFSTPNVMRPYVER	ARPDSQINKDMSTGEVEIFANTLNIINR
ANDAAGDGTTTATVLAQ	ANVLQSSILWR	ARPEAQELNILR
ANDAAGDGTTTATVLAQSIITEGLK	ANVPTGVQLAEK	ARPHQLAAIIEQHQPDVIGLQETK
ANDAAGDGTTTATVLAQSIITEGLKAVAAGMNPMDLK	ANVSIPASAASETPVSTPD	ARPQAEEELAQLR
ANDAAGDGTTTATVLAQSIITEGLKAVAAGMNPMDLKR	ANVSQVM*HIIGDVAGR	ARVEDALHATR
ANDIGLNTPGAVEAVTYLK	ANVSQVMHIIGDVAGR	ASAAM*EKNNTIVLK
ANDKLETFQNR	ANVSQVMHIIGDVAGRDCVLVDDMIDTGGTLCK	ASAAMEKNNTIVLK
ANDTVLSDVLTLEK	ANVVAGLVNWLAK	ASAATILNVTEDHTDRYPLGLQQYR
ANDVVVELLR	ANVVEIYLVR	ASADDIAWVLK
ANELSDAAENK	ANYNLSSAVIDSILLLIER	ASAEGQFPAAVILSCIDSR
ANELSDAAENKGSAVK	ANYSNPPAHGASVVATILSNAALR	ASAENGIASVQSNSPQESQYELK
ANELVNLAIEK	APAAPNYPM*M*QQPY	ASAIEHDGQGMFAGMPNPLPVAR
ANEYADPASIQSLFSPGR	APADPILGLTDIFR	ASALHILVDDEK
ANFGQYFSVENVLFR	APAEIILDTGIGETFNAR	ASALHILVDDEKQANDILAQLNNGANFQELAK
ANGAEIDDAAINGIK	APAEPQRYDAVLVAIGR	ASAMFSHVILAIADSSSK
ANGDQKEFAPSEDPGVVSVTEIYQYYK	APAPDYAPESPTK	ASAMPGIPEMGEVWGPANSALELSVTGK
ANGDQKEFAPSEDPGVVSVTEIYQYYKK	APATLTDWRPWLHEMR	ASAPLIYDPLLTQYINTLGNR
ANGLSQAEFDALM*TQK	APATQENLQTLSK	ASASDTGVAVGFNSK
ANGLSQAEFDALMTQK	APATVENFLNYCR	ASASEWAFEIIDDDHIR
ANGVIKDEDPSVAGLNMALELPHEMK	APAVALGPN	ASAVAIQASR
ANGYQSLHTSLIGPHGVPVEVQIR	APAVALGPNDHM*K	ASDFGFSAK
ANHLGSIR	APAVALGPNDHMK	ASDQGPNAGKWDNSEIM*AEILTLR
ANHLTEQQWR	APDASFLWHLATHYAPVLSSEYADVLTQK	ASDQGPNAGKWDNSEIMAEILTLR
ANHVGDWGTQFGM*LIAYLEK	APDFTAAAVLGNGEIVENFNLKK	ASDRTKLENEVM*K
ANHVGDWGTQFGMLIAYLEK	APDHGALQPWR	ASDRTKLENEVMK
ANIALVLYK	APDILSNATSHAIGVLLPSLTNQVFAEVLR	ASDVFLAVNSYR
ANIGELSTK	APDLTEEELIQIADSLVR	ASDVKDSSLR
ANITVNKNSVPNDPKSPFVTSGVR	APDMAAVNTTILDQLNSDVVLINQLGHYIISGGGK	ASDWGWQIDPVGLR
ANKELHTIPR	APDSWSTLLAQWADR	ASEILEKENAQFFDILPILESLK
ANKLELTVPEM*TVLIGGLR	APDVSVAEIHGVPVIYLR	ASEILEKENAQFFDILPILESLKK
ANKLELTVPEMTVLIGGLR	APDVWTNNSFVR	ASELLGGAR
ANLAGLM*DGYFHHEASIEGGQHLNVNVMNR	APDYDDWTSPSAEGFSGLNGDIIVWNPILEDAFEISSM*GIR	ASELNAALESAFAHPGPVLVDVVTAK
ANLAGLMDGYFHHEASIEGGQHLNVNVM*NR	APDYDDWTSPSAEGFSGLNGDIIVWNPILEDAFEISSMGIR	ASGANSILTDLSNEAVAVAMEDAVR
ANLAGLMDGYFHHEASIEGGQHLNVNVMNR	APDYTITDIDLDFALDAQK	ASGASVVLFDHALSAAQER
ANLEETGMGYGLEVEMIR	APEPSAEESPSK	ASGFIAHAAAFNVTNHDEVNEAIEK
ANLFDPDIESDINQPLIDVAM*VNSTLVATLNQAK	APEQFVPHNLAGEGPK	ASGGTGLGLAIVETAVSQHR
ANLFDPDIESDINQPLIDVAMVNSTLVATLNQAK	APEVAEEQR	ASGHDTGVSPLVALGAEYAWTK
ANLGSLGDQVNVK	APFDNWLDEQLSR	ASGHDTGVSPLVALGAEYAWTKNWATR
ANLILSAASFAESDGTLVNQEGR	APFDNWLDEQLSRDPNS	ASGIQTGGPNTLNQR
ANLKPEGQQALDQLYAQ	APFFVGTK	ASGLVLVDFWAEWCGPCK
ANLKPEGQQALDQLYAQLS	APGALTVSETTFGR	ASGNPAAFHAADGSGYQFLVEILSDLNTR
ANLKPEGQQALDQLYAQLSSID	APGAVQIFYGDESGRK	ASGNPVQADDVIYSFTR
ANLKPEGQQALDQLYAQLSSIDPK	APGEAVYITEK	ASGTDEATTLVPFLK
ANLKPVLITGM*EK	APGFGDRR	ASGTDEATTLVPFLKK
ANLKPVLITGMEK	APGLAVVLVGENPASQIYVASK	ASIPYTVNER
ANLLGIFTVSEDGR	APGMTAELAGPALQELLNNGLQR	ASIWALGPLVAR
ANMAGMNDK	APGQPLEALTAAFLER	ASIYNAMPIEGVK
ANMLIGSSTEPEK	APHHTQVVVVVPGR	ASLAAGAAGAISGSAIVK
ANMLIGSSTEPEKLVIDFR	APIFFNTMEDAGALPIEVDVAK	ASLATESFISAASFQETTR
ANNAINDM*VR	APIFYTVPLQLLSYHVALIK	ASLESNFALR
ANNAYYNSLVMIDADGSVLDVYRK	APIIIWPESAIPDIETDQNTFLTMIDGLM*R	ASLESTVDVEVSSAR
ANNDIGAIYAR	APIIIWPESAIPDIETDQNTFLTMIDGLMR	ASLIPHQLHIAYEVGQR
ANNEALLNSFWLLDDEK	APINWVLVNGETETGVTLHQMVK	ASLPTIEAALK
ANNEALLNSFWLLDDEKAELR	APISTQNFVDYVNNGYYNNTIFHR	ASLQDDM*NILIANLGIVSSSTDTK
ANPNLTGIITGLK	APITEYLQSNVVLLK	ASLQDDMNILIANLGIVSSSTDTK
ANQGIM*EFVEMFK	APIVAAVPVVAETTAAETVVAK	ASLTGTQNIK
ANQGIMEFVEMFK	APIVAPTPAPAPIVDTK	ASLTGTQNIKTELEQAK
ANQLLSQNLK	APKDNTWYTGGK	ASMGILTQPISFLGLPVVSVPLK
ANQM*KPHPTASSQDYLFAK	APLAESAIAAVTDAMR	ASMNDKASM*TVK
ANQMKPHPTASSQDYLFAK	APLEVSQASGALNWR	ASMNDKASMTVK
ANQRLDNQAQAYK	APLIITVIAHVTENAK	ASMYVWAK
ANQRLDNQAQAYKK	APLSGEIVNIEDVPDVVFAEK	ASNHPNISVK
ANQTQYHFLSGFTAK	APLVEELVR	ASNQGEPVILDKESDAGK
ANSDSTVGELIAQAMEK	APLVVGFSQIGSESGWR	ASNTTQGGFDGPATK
ANSFFQNTEYAATGYPDSAELAWLAPLKDK	APMSVAQQSLVLFAAER	ASPEITLLMNDSQNDQSK
ANSHAPEAVIDGASR	APNLMQLYSAYGGNANLKPEESK	ASPEITLLMNDSQNDQSKQNDQIDVLLAK
ANSSGVDLANEHR	APPGVTAHVVDVEK	ASPQDLQSFLAER
ANTLAGDPITAR	APQAAIRDM*NTFKTGWLVLALLLIGFFA	ASPSILDGIQVEYY
ANTSSMNYYR	APQETEQDR	ASPSILDGIQVEYYGTATPLR
ANVAIVGFSTPNVM	APQEVDKVAAVVDNGVVLQSDIDGLLQSVK	ASQAVPGSGQGQLITVK
ANVAIVGFSTPNVM*	APQMDYPVIAQDVLALMDELAITQAIIIGHSMGGK	ASQNALEAFGK
ANVAIVGFSTPNVMR	APQPEEDVSSIPR	ASSAHVADTFR
ANVAIVGFSTPNVMRPYVER	APQSTFVNVLGSLGIVSADKYNAK	ASSAHVADTFRQENSVR
ANVSIPASAASETPVSTPD	APQSYPVQAMATITTHDLPTLR	ASSGLNEEEIQK
ANVSQVM*HIIGDVAGR	APSEEPEFDHGGISGK	ASSHLNDEIQGAWAAR
ANVSQVMHIIGDVAGR	APSIMQVPGAK	ASSSHFQYQVLR
ANVSQVMHIIGDVAGRDCVLVDDMIDTGGTLCK	APSPTGYLHVGGAR	ASSVVFAGGGAK
ANVVAGLVNWLAK	APSTFNPLYSHDR	ASTPLGVGGFGAAR
ANVVGIQMEFVK	APSYEELASSQDLLETGIK	ASTVANVVR
ANVWDGWVTR	APTGKPAAAAEM*TK	ASVEIDRK
ANWLQALDYIR	APTPAPAPIVDTK	ASVGAPPDILGPLGQNWGLPPMDPHVMVAR
ANYSNPPAHGASVVATILSNAAL	APTTEVIRLMRTSTDDVIGQNYIKAAATRGLSR	ASVGNWFK
ANYSNPPAHGASVVATILSNAALR	APVALLDFAASAR	ASVQDLSSR
APAAAGGGLPGILPWPK	APVDAAPQVEK	ASVQDLSSRLESVVEGGLVLSQLMASPSPIR
APADPILGLTDIFR	APVDGTIGK	ASVSDAESM*LPVAYIK
APAEIILDTGIGETFNAR	APVGQAYVVQLGALK	ASVSDAESMLPVAYIK
APAEPQRYDAVLVAIGR	APVGTHETLLAYLVR	ASVSQVSLLAAAQK
APAPDYAPESPTK	APVIVQFSNGGAAFIAGK	ASWGLFR
APATLTDWRPWLHEMR	APVMDYLTEK	ASWIGDYNEPSTFLSLLTSR
APATQENLQTLSK	APVMDYLTEKLEQTFTVHK	ASYDTVLAAEVAAR
APATVENFLNYCR	APVVIPAGVEVK	ASYHDVVNPQLQEASEAMINEEAWVLSDGK
APAVALGPN	APVVTIM*GHVDHGK	ASYSM*EFLEYAEAPSNVAK
APAVALGPNDHM*K	APVVTIMGHVDHGK	ASYSMEFLEYAEAPSNVAK
APAVALGPNDHMK	APVVTIMGHVDHGKTSLLDYIR	ASYTLNQTELR
APDASFLWHLATHYAPVLSSEYADVLTQK	APVWLAAQDALSQLSEQSGEALEDSR	ASYYSNDFRPGLK
APDFTAAAVLGNGEIVENFNLKK	APVYEVAQVTPLQVMEK	ATAAEVFGSPLEK
APDHGALQPWR	APWFHHQEGK	ATAALHQVLSSNKK
APDILSNATSHAIGVLLPSLTNQVFAEVLR	APWPSSEAELNALWDAK	ATAANSTALGANSVADR
APDLTEEELIQIADSLVR	APYAVIGEATEEK	ATAANSTALGANSVADRENSVSVGSVGNER
APDM*AAVNTTILDQLNSDVVLINQLGHYIISGGGK	APYAVIGEATEEKHLLLNDR	ATADYEVTR
APDMAAVNTTILDQLNSDVVLINQLGHYIISGGGK	APYAVVWER	ATAETMIQAGATR
APDSWSTLLAQWADR	AQAAQAEIMEAYENYDFHLVVQR	ATAIWMSFEK
APDVSVAEIHGVPVIYLR	AQADSAQAALK	ATASNGDVLFDKHEGFR
APDVWTNNSFVR	AQADSAQAALKLPDDLK	ATDFVLAM*GQGR
APDYDDWTSPSAEGFSGLNGDIIVWNPILEDAFEISSM*GIR	AQADSAQAALKLPDDLKVVFNR	ATDFVLAMGQGR
APDYDDWTSPSAEGFSGLNGDIIVWNPILEDAFEISSMGIR	AQAETAMALQEWHQMELLTDDVISR	ATDGILGSSPATTLTLTASSLPDIQAGSVVLYR
APDYTITDIDLDFALDAQK	AQAFDAEGKPSK	ATDPFVGNLTFFR
APEGFFYLRPR	AQAFEQDNR	ATDSNVMATSVPNPLLRTDGATAKK
APEPSAEESPSK	AQAHNIPSLK	ATDVAIVHFAQAIQALR
APEQFVPHNLAGEGPK	AQALGFSAENINPQPVL	ATDVPVIAFSVGEEELR
APEQYGDNCEVCGATYSPTELIDPK	AQALGFSAENINPQPVLDYLHYYR	ATEAQWRGSCTLSRLITK
APEVAEEQR	AQALGVAISDINTTLGSAMGGSYVNDFIDR	ATEFDPYVLTK
APFDNWLDEQLSRDPNS	AQALWDQLAAQTGEK	ATEGELLSQVEPEDLIK
APFFVGTK	AQAQLLLDVYQHTLPASAESLWLQIR	ATEGQGFK
APFLSSVAPDFFGISSFTELPAIK	AQASAQIAHLTVNR	ATELGYTTLVASHDDDVNKQNQLIETAIAR
APGALTVSETTFGR	AQCGDVASDVPR	ATELQGM*ER
APGLAVVLVGENPASQIYVASK	AQDTSAHAAHWLK	ATELQGMER
APGMTAELAGPALQELLNNGLQR	AQDYPHMLVTTGLHDSQVQYWEPAK	ATFGDVPDYVVNLTSDNLNLDAIFGWQPK
APGQPLEALTAAFLER	AQDYTVEQLNYGR	ATGLDALFDATIEEMKK
APGSAAIIFAAPEATR	AQEPEPRPGLR	ATGLGYPLVVRPS
APIACAGPLLSAELEALGK	AQESTDYLALIAQAVK	ATGLGYPLVVRPSYVLGGR
APIFFNTMEDAGALPIEVDVAK	AQETQGKPTVILAHTIK	ATGM*TDDDFGKPIIAVVNSFTQFVPGHVHLR
APIFHVNADDPEAVAFVTR	AQEVLDTDHYGLER	ATGMTDDDFGKPIIAVVNSFTQFVPGHVHLR
APIIIWPESAIPDIETDQNTFLTMIDGLMR	AQFAAVPLNLLGDR	ATGTLPDAGQILNTLINSILLLDDDLAIHYANPAAQQLLAQSSR
APILDEIAEEYEGR	AQFQPTAIAQK	ATGVEFDVR
APILSSLYYSDGK	AQGAEIISVPAAFTK	ATGWSAFYIDGK
APINWVLVNGETETGVTLHQMVK	AQGEAPVVPQVSADEATANLAELLNAGFGNNKG	ATHHIAEIIEM*TER
APISTQNFVDYVNNGYYNNTIFHR	AQGINDIVFTREPGGTPLAEK	ATHHIAEIIEMTER
APITEYLQSNVVLLK	AQGINETLFMALITLDAQESR	ATHNDSMSSEQVDNVR
APIVAAVPVVAETTAAETVVAK	AQGVQLAAK	ATHNTDKIIHDPR
APKDNTWYTGGK	AQIAENPLILVDGSSYLYR	ATHPVFAGDTLYAESTVLHK
APLAESAIAAVTDAMR	AQIAIYDYLK	ATIAALEDM*KSPEMVAAK
APLAKVINDKFGIVEALMTTVHATTATQK	AQIASADSQYGK	ATIAALEDM*KSPEMVAAKR
APLEVSQASGALNWR	AQIASADSQYGKR	ATIAALEDMK
APLIITVIAHVTENAK	AQIDGLEGYPVYTR	ATIAALEDMKSPEM*VAAK
APLPADLGA	AQIKPLATGIHPDR	ATIAALEDMKSPEMVAAK
APLSGEIVNIEDVPDVVFAEK	AQILDEAKAEAEQER	ATIAALEDMKSPEMVAAKR
APLVEELVR	AQINHLQGHFSEHKK	ATILATGGAGR
APLWYTPLPSIATIAMVPDLTSPQWHSR	AQISELQSFVSR	ATINDIGGILELIRPLEQQGILVR
APMSVAQQSLVLFAAER	AQIVGMDTGSLK	ATISDLGPLLLGR
APNLMQLYSAYGGNANLKPEESK	AQLAFAGIESR	ATLDFTGSIDGEEFEGGK
APPQISAEVLK	AQLEQAM*QSER	ATLESIAYQTR
APPVDFASLADVFK	AQLEQAMQSER	ATLGEVGNAEHMLR
APQEVDKVAAVVDNGVVLQSDIDGLLQSVK	AQLLADLNDLDVLNDEELLNRR	ATLLALNIQR
APQM*DYPVIAQDVLALMDELAITQAIIIGHSM*GGK	AQLLDSDGLVR	ATLMGISEAELTHSR
APQMDYPVIAQDVLALMDELAITQAIIIGHSMGGK	AQLNDTPDINVDLAENELDDILK	ATLNLGEAAIELGVLSPTLGTDVIDVR
APQPEEDVSSIPR	AQLNDTPDINVDLAENELDDILKR	ATLTLLLK
APQSTFVNVLGSLGIVSADKYNAK	AQLPLLSHDLPADFAQMR	ATM*TPALDAGFYIQPTLIK
APSERLDEIITLLPGAERPTILPLAGDK	AQLSILINR	ATMGLDPGLR
APSILSADFAR	AQLSYHQAM*NK	ATMTPALDAGFYIQPTLIK
APSIMQVPGAK	AQLVSNNAQGAALGAIQWVK	ATMTPALDAGFYIQPTLIKGDNLMR
APSIMQVPGAKDIAVEFFTLSK	AQMTAAGITPQQLSDLLSR	ATNAKPVYQR
APSYEELASSQDLLETGIK	AQNGTLSILIGGEDR	ATNLAPATVSSTSTDAVVGSQLYTVIQDGTR
APTGKPAAAAEM*TK	AQPDETYSDSANVR	ATNVGSTEAALDGLQVDGTLHLLLGGDGK
APTGKPAAAAEMTK	AQPQIASRPVAAATAGATVK	ATPAVGFAMGLER
APTM*GEM*YNDSK	AQQLEQFYAVIDK	ATPQWFISMDQK
APTMNIAVVGLGWDAR	AQQNAITLMEEIAANFSYEAVR	ATPSVEVQPGMQPHEKPE
APTMTNVLIGLGWDAR	AQQPGAISAYDLLDLLR	ATPVELDFSQVEK
APTPAPAPIVDTK	AQQQQAAAGGDAGDTSAK	ATPVELDFSQVEKG
APVALLDFAASAR	AQQTGWFTR	ATPVFMGVPAEFMAQAK
APVDAAPQVEK	AQQVQLSATVAESQLGQR	ATQDAYVGWNDIKGRKLSISDGSPDPYM*R
APVGQAYVVQLGALK	AQQYGVAFPQGSDLR	ATQGENAIVTLGYALNPDGTM*NDVLIQR
APVGTHETLLAYLVR	AQQYGVAFPQGSDLREK	ATQGENAIVTLGYALNPDGTMNDVLIQR
APVIVQFSNGGAAF	AQSADLILWNGMNLER	ATQQLTVWEDIKK
APVIVQFSNGGAAFIAGK	AQSGNLEGMNVLLRPISADVLENLINTAASSFVYR	ATSGEEWVGILQGPLPQESGIKR
APVMDYLTEK	AQSHDIGLTIVGPEAPLVIGVVDAFR	ATSHLLQQGYK
APVMDYLTEKLEQTFTVHK	AQSM*DALSSM*AN	ATSHLLQQGYKR
APVMLAYSAR	AQSM*DALSSMANIAGYR	ATSPLLDIQNLSVAFSQAGVQR
APVVIPAGVEVK	AQSMDALSSM*ANIAGYR	ATSTALIISKAPAFDIAR
APVVTIM*GHVDHGK	AQSMDALSSMANIAGYR	ATTEPLKMEVYNPGEK
APVVTIMGHVDHGK	AQSPVGATGLMQVMPR	ATTTEQLGFTGR
APVVTIMGHVDHGKTSLLDYIR	AQSVTLDYHSK	ATVFIFPDLNTGN
APVWLAAQDALSQLSEQSGEALEDSR	AQSWQQSLSQR	ATVFIFPDLNTGNTTYK
APWFHHQEGK	AQTGIDGILHWLDWVPVR	ATVGDQVFAGDVVK
APWPSSEAELNALWDAK	AQTIAFDDFIT	ATVGIFFGSDTGNTENIAK
APYAVIGEATEEK	AQTIAFDDFITYKGEQGAK	ATVIAQEPAVENTPQTGR
APYAVVWER	AQTKTEEFDAIK	ATVIQQFAALLE
APYAVVWERLPAALEK	AQVAINAGKPDEAEK	ATVLIETLPAVFQMDEILYHLR
AQAAQAEIMEAYENYDFHLVVQR	AQVGDVAAQVLLLLSR	ATVQGEDGR
AQADSAQAALK	AQVGIFVGTVYGNALLVAEEAENILK	ATYGNYIGGEFVEPLGGQYFM*NTSPVNGSDIAQFPR
AQADSAQAALKLPDDLK	AQVGIFVGTVYGNALLVAEEAENILKDQGHEVK	ATYGNYIGGEFVEPLGGQYFMNTSPVNGSDIAQFPR
AQADSAQAALKLPDDLKVVFNR	AQWQAEVEQMR	ATYIVVHDGMGK
AQAETAMALQEWHQMELLTDDVISR	AQYLIAKYPDTVE	ATYNVQGAFTATNEK
AQAFDAEGKPSK	AQYLIDQVLGEAR	ATYNVQGAFTATNEKITDAVNSVLSDVIADMAQDTSVSSFIK
AQAFEQDNR	AQYNAITGGPAYR	AVAAAAELGVWMVNVHASGGAR
AQAIFNSATGEPIR	AQYVLAENVTGMVHGPEGLAAAK	AVAAAAPVLA
AQALGFSAENINPQPVLD	AQYVLAENVTGMVHGPEGLAAAKR	AVAAAAPVLAGR
AQALGFSAENINPQPVLDYLHYYR	ARAEVEADAK	AVAAGM*NPM*
AQALGVAISDINTTLGSAM*GGSYVNDFIDR	ARDANLQVVTNK	AVAAGM*NPM*DLK
AQALGVAISDINTTLGSAMGGSYVNDFIDR	ARDDLQAVMALVR	AVAAGM*NPM*DLKR
AQALWDQLAAQTGEK	ARDVAAQVIAK	AVAAGM*NPMDLK
AQANLSEILFKPK	ARDVEPIQTALDKLK	AVAAGMNPM*D
AQAQLLLDVYQHTLPASAESLWLQIR	AREEGIPIVMGTATPALETLHNVQMGK	AVAAGMNPM*DLK
AQASAQIAHLTVNR	ARESFGYEGGYFLVYPIK	AVAAGMNPM*DLKR
AQDNKSLGQFNLDGIQPAPR	ARESLGLPVSDVFR	AVAAGMNPMDLK
AQDTSAHAAHWLK	ARESLGLPVSDVFRVPKPVAK	AVAAGMNPMDLKR
AQDYLSKR	AREVPAAIQK	AVAAVNGPIA
AQDYPHMLVTTGLHDSQVQYWEPAK	ARFPDLDAK	AVAAVNGPIAQ
AQDYTVEQLNYGR	ARGEDIEPLR	AVAAVNGPIAQAVIGK
AQETQGKPTVILAHTIK	ARGEDIEPLRLEVNALGEK	AVAEAMGSQAVIVR
AQEVLDTDHYGLER	ARGEDIEPLRLEVNALGEKLDAAK	AVAEAYYASR
AQFAAVPLNLLGDR	ARGELDRIEQESLAFFER	AVAEEWQIPDVAGYAMSR
AQFAAVPLNLLGDRNSADYIDGGYWAHSAIK	ARGEVAGIASEEEDDIVIFDGGR	AVAEGANMPTTIQATDAFLEAGVLFAPGK
AQFGDYQANGVMAVAK	ARHPAIGAGVQQSQQTANYYAFSR	AVAELSSLSGDLDR
AQFNVVSEAHNEGTIVSVSDGIIR	ARLDEGIRPDALLVPQQGVTR	AVAEVYASDDAK
AQFQPTAIAQK	ARLPATDGQVK	AVAEVYASDDAKEK
AQGAEIISVPAAFTK	ARLPATDGQVKFPAWSPYL	AVAFALYK
AQGEAPVVPQVSADEATANLA	ARLPSSQLEQAR	AVAFMMDDALLAGER
AQGEAPVVPQVSADEATANLAELLNAGFGNNKG	ARNDAISYLSSR	AVAGDTFDIR
AQGFDLQLIGR	ARNGAIPVPGPIMMTGVSGLAGKR	AVAGEHTYPDK
AQGTDVSFGEFGLK	ARPATEVFTELFGK	AVAGEHTYPDKGSLYVATTHTQAR
AQGVQLAAK	ARPDSQINK	AVAGESTLFEGTQGLPALLTEQLTQR
AQGVQLAAKLSYPVAQDLDVYTR	ARPDSQINKDMSTGEVEIFANTLNIINR	AVAGQANLLDKDGQIISGGK
AQIAENPLLLVDGSSYLYR	ARPEAQELNILR	AVAIAESLGIK
AQIASADSQYGK	ARPFIGDKPGHFQR	AVALKEAMEPEFK
AQIASADSQYGKR	ARPHQLAAIIEQHQPDVIGLQETK	AVANNNIGAIYAR
AQIDGLEGYPVYTR	ARPQAEEELAQLR	AVAVDSGVTSVAK
AQIDGLEGYPVYTRK	ARTRADIPTVSLVGYTNAGKSSLFNKIT	AVAVDSGVTSVAKR
AQIKPLATGIHPDR	ARVEDALHATR	AVAYQDLSEADFK
AQILDEAKAEAEQER	ARVTVQDAVEK	AVDAEGHELVYAGMSK
AQINHLQGHFSEHKK	ASAAM*EKNNTIVLK	AVDFSDGYYNSGLL
AQISELQSFVSR	ASAAMEKNNTIVLK	AVDFSDGYYNSGLLVMVK
AQIVGMDTGSLK	ASAATILNVTEDHTDRYPLGLQQYR	AVDKFEYR
AQLAFAGIESR	ASADDIAWVLK	AVDNLLHPEQFSL
AQLEQAM*QSER	ASAEGQFPAAVILSCIDSR	AVDSSAVYVNASTR
AQLEQAMQSER	ASAENGIASVQSNSPQESQYELK	AVEAGIADYWYK
AQLLADLNDLDVLNDEELLNR	ASAGGLLDNFVIDGYR	AVELFSLMMQER
AQLLADLNDLDVLNDEELLNRR	ASAIEHDGQGMFAGMPNPLPVAR	AVELGVASPETYR
AQLLDSDGLVR	ASALHILVDDEK	AVELGVASPETYREQAR
AQLNDTPDINVDLAENELDDILK	ASALHILVDDEKQANDILAQLNNGANFQELAK	AVELLTASGEK
AQLNDTPDINVDLAENELDDILKR	ASAMPGIPEM*GEVWGPANSALELSVTGK	AVENALRDFQLSGIGLAPEQQK
AQLPLLSHDLPADFAQMR	ASAMPGIPEMGEVWGPANSALELSVTGK	AVENALRDFQLSGIGLAPEQQKR
AQMTAAGITPQQLSDLLSR	ASANPFM*NHVR	AVEPGTILSASNTVFTVSLTDPVWVR
AQNGDILVSYIR	ASAPLIYDPLLTQYINTLGNR	AVEQALEDNCPLVCFSSSGGAR
AQNGTLSILIGGEDR	ASAVAIQASR	AVESGDKKPIR
AQPDETYSDSANVR	ASDFGFSAK	AVETLILDEADR
AQPQIASRPVAAATAGATVK	ASDFVNGHLLFVDGGMLVAV	AVETLVMIYNK
AQQAFHDASFLLRPAHQK	ASDGTEALVGGHNMNMDLFR	AVETVDFMTAHWAHLPYDFLGR
AQQLEQFYAVIDK	ASDLANMLLQDAGWNDALVSSK	AVEYFLK
AQQNAITLMEEIAANFSYEAVR	ASDQGPNAGKWDNSEIMAEILTLR	AVFAQGANAEAAK
AQQPGAISAYDLLDLLR	ASDRTKLENEVMK	AVFEDGVDLMGYTPWGCIDCVSFTTGEYSK
AQQQQAAAGGDAGDTSAK	ASDVFLAVNSYR	AVFHVQSSGR
AQQTGWFTR	ASDVKDSSLR	AVFSTLVATLR
AQQYGVAFPQGSDLR	ASDWGWQIDPVGLR	AVFTDTVLPTDAISLNFAR
AQREYANFSQEQVDKIFR	ASEAVLAFDPDDPYEIR	AVFVNIFGGIVR
AQRPQPATINAPHSAK	ASEIIHQIPHHQETPIIAVTAHAVK	AVGAVITAVDESVDATR
AQSGNLEGM*NVLLRPISADVLENLINTAASSFVYR	ASEILEKENAQFFDILPILESLKK	AVGDDLAYQVDNNSLTQLLHIAQQDQNEIMIFVGNR
AQSGNLEGMNVLLRPISADVLENLINTAASSFVYR	ASELLGGAR	AVGEFGIDTNNMFEFWDWVGGR
AQSHDIGLTIVGPEAPLVIGVVDAFR	ASELNAALESAFAHPGPVLVDVVTAK	AVGEGVAIRPTDK
AQSM*DALSSM*ANIAGYR	ASFGNVHGVYKPGNVK	AVGEGVAIRPTDKIVVSPASGTIVK
AQSM*DALSSMANIAGYR	ASFVTLQDVGGR	AVGESVNRPLEYYNNNVFGTLVLLEAMR
AQSMDALSSM*ANIAGYR	ASGANSILTYLSNEAVAVAMEDAVR	AVGFDMQIAYTDTVHDSSLPYQYVPDLISLAK
AQSMDALSSMANIAGYR	ASGASVVLFDHALSAAQER	AVGINAIHVTDR
AQSPVGATGLMQVMPR	ASGFIAHAAAFNVTNHDEVNEAIEK	AVGLIEAQVVR
AQSVTLDYHSK	ASGHDTGVSPLVALGAEYAWTK	AVGNLELSNDDVR
AQSWQQSLSQR	ASGHDTGVSPLVALGAEYAWTKNWATR	AVGQGFAGGLS
AQTIAFDDFITYK	ASGIQTGGPNTLNQR	AVGQGFAGGLSALASQHGVSV
AQTKTEEFDAIK	ASGQLQQTHLLK	AVGVHQDAYK
AQTQANPFTTNRPISR	ASGSELGDYQGTTGITTR	AVGWAALDYVKPGTIVGVGTGSTAAHFIDALGSIK
AQVAINAGKPDEAEK	ASGTDEATTLVPFLK	AVHAIVHK
AQVGDVAAQVLLLLSR	ASGTDEATTLVPFLKK	AVHAIVHKNENAA
AQVGIFVGTVYGNALLVAEEAENILK	ASIPYTVNER	AVHAIVHKNENAAAAYQLFLHEQN
AQVGIFVGTVYGNALLVAEEAENILKDQGHEVK	ASIWALGPLVAR	AVHGSDAVESAQR
AQVGTISANSDSTVGELIAQAMEK	ASIYNAMPIEGVK	AVIAAVEELK
AQVIAPNGSEILVAASTVEK	ASLATESFISAASFQETTR	AVIAAVEELKK
AQVIVEAVVENPK	ASLEEIEQHWMAR	AVIESENSAER
AQVVGCVEAPK	ASLEHDIVHALQALPAR	AVIESENSAERDQLLENLQEGM*EVK
AQWQAEVEQMR	ASLESNFALR	AVIESENSAERDQLLENLQEGMEVK
AQYGANELPQIWDELWR	ASLESTVDVEVSSAR	AVIGNPTLIGSIMVHR
AQYLIAKYPDTVE	ASLHIDDIPAAIK	AVIGQVHPHTAPAR
AQYLIDQVLGEAR	ASLIPHQLHIAYEVGQR	AVILAGGLGTR
AQYNAITGGPAYR	ASLPTIEAALK	AVISLKDVDSIYKIPGLLK
AQYVLAENVTGMVHGPEGLAAAK	ASLQDDMNILIANLGIVSSSTDTK	AVITATQM*M*ESM*
ARADKLGINPDFYEKR	ASLSSALLASASQVWR	AVITATQMMESMITNPMPTR
ARAEVEADAK	ASLTGTQNIK	AVITGDVTQIDLPR
ARATILATGGAGR	ASM*GILTQPISFLGLPVVS	AVITGLGIVSSIGNNQQEVL
ARDANLQVVTNK	ASM*GILTQPISFLGLPVVSVPLK	AVITGLGIVSSIGNNQQEVLASLQEGR
ARDDLQAVMALVR	ASM*NDM*ASM*NGK	AVIVILGEGTNEK
ARDEALHLTGTQHILNLMR	ASM*NDMASM*NGK	AVLEGDILGTYLHGAR
ARDVAAQVIAK	ASMGILTQPISFLGLPVVS	AVLEGVGFALADGMDALHASGLQPK
ARDVEPIQTALDKLK	ASMGILTQPISFLGLPVVSVPLK	AVLEHGGIK
ARESFGYEGGYFLVYPIK	ASMNDM*ASM*NGK	AVLEVAGVHNVLAK
ARESLGLPVSDVFR	ASMNDM*ASMNGK	AVLGAAGGIGQALALLLK
ARESLGLPVSDVFRVPKPVAK	ASMNDMASMNGK	AVLVVGLDSLMR
AREVPAAIQK	ASMYVWAK	AVMFTGSTEVATILQR
ARFPDLDAK	ASNAHVADTFR	AVMGSNVVADQDISLR
ARGEDIEPLR	ASNGEIILSSEM*YASK	AVMWQDEVLM*IR
ARGEDIEPLRLEVNALGEK	ASNGEIILSSEMYASK	AVMWQDEVLMIR
ARGEDIEPLRLEVNALGEKLDAAK	ASNGLIAIITPSHDNPFFK	AVNAGQIDGGVIYHYYPFVDQAK
ARGELDRIEQESLAFFER	ASNHPNISVK	AVNNPIYPEVIR
ARHPAIGAGVQQSQQTANYYAFSR	ASNQGEPVILDKESDAGK	AVPALAAGGHLDPNK
ARKKGDIPRSKDVTMAAGLVTSFILLSLFLPYYK	ASNQGEPVILDKESDAGKAYEDTVDR	AVPALAAGGHLDPNKTGVHLGPYNDK
ARLDEGIRPDALLVPQQGVTR	ASNTTQGGFDGPATTQTQPATQGGFTGPSASSTTVDK	AVPDPVQDIHDAR
ARLDELISSLPEGLDTLVGER	ASNTTQGGFDGPATTQTQPATQGGFTGPSASSTTVDKVK	AVPGPEYHEFDEVAR
ARLPATDGQVK	ASNTVLSSLNQAMQEPGFNSK	AVPIAEAMMAIVLM*DHLLR
ARLPATDGQVKFPAWSPYL	ASPEITLLMNDSQNDQSK	AVPIAEAMMAIVLMDHLLR
ARNQKDGGDLVYFQGHISPGVYAR	ASPEITLLMNDSQNDQSKQNDQIDVLLAK	AVPLLYNALASGEM*LPTVELK
ARPATEVFTELFGK	ASPFNDRDAELQTIEFLK	AVPLLYNALASGEMLPTVELK
ARPDSQINK	ASPQDLQSFLAER	AVQGGSTLTQQLVK
ARPDSQINKDMSTGEVEIFANTLNIINR	ASPSILDGIQVEYY	AVQLGGVALGTAQVINDK
ARPEAQELNILR	ASPSILDGIQVEYYGTATPLR	AVQLGGVALGTAQVINDKTPLK
ARPHELLPGTLR	ASQAVPGSGQGQLITVK	AVQQDGADETVLEK
ARPHQLAAIIEQHQPDVIGLQETK	ASQLLDISLTKR	AVQVTTGAK
ARPQAEEELAQLR	ASQLPEVTVLAPASFK	AVRPGATLGDIGASIQQLAEGAGFSVVR
ARVEDALHATR	ASQNALEAFGK	AVSGLESEVLIFAK
ARVTVQDAVEK	ASRSRMVECHGTGLLLR	AVSM*AKPYNAK
ASAAM*EKNNTIVLK	ASSAATYGGR	AVSMAKPYNAK
ASAAMEKNNTIVLK	ASSGLNEEEIQK	AVSQEWSGPEALLSDLSAYLQGETPK
ASAATILNVTEDHTDRYPLGLQQYR	ASSHLNDEIQGAWAAR	AVSTWSTLQLFR
ASADDIAWVLK	ASSSHFQYQVLR	AVTAHHTVLVSNVIGVER
ASAEGQFPAAVILSCIDSR	ASSVCVRFSPNTLLTSR	AVTGTMLVAAMKEDDVNIWGDGSTYK
ASAENGIASVQSNSPQESQYELK	ASTPLGVGGFGAAR	AVTNVAELNELVAR
ASALHILVDDEK	ASTPMYLMSR	AVTTFQAYR
ASALHILVDDEKQANDILAQLNNGANFQELAK	ASTVANVVR	AVVAQVPFVDVVTTMLDESIPLTTGEYDEWGNPNDK
ASAM*PGIPEM*GEVWGPANSALELSVTGK	ASVEIDRK	AVVAQVPFVDVVTTMLDESIPLTTGEYDEWGNPNDKVYYDYIK
ASAMFSHVILAIADSSSK	ASVGAPPDILGPLGQNWGLPPMDPHVMVAR	AVVESIQR
ASAMPGIPEM*GEVWGPANSALELSVTGK	ASVHELELYADALLNR	AVVGGVAVSGNIHLWVADTQTPESR
ASAMPGIPEMGEVWGPANSALELSVTGK	ASVQDLSSR	AVVGMLSDKDIAGTLACLSERVDEWYCAPLEGPR
ASANPFMNHVR	ASVQDLSSRLESVVEGGLVLSQLM*ASPSPIR	AVVLDHNANIVSVSQR
ASAPLIYDPLLTQYINTLGNR	ASVQDLSSRLESVVEGGLVLSQLMASPSPIR	AVVNKPAVLLADEPTGNLDDALSEGILR
ASAVAIQASR	ASVSDAESM*LPVAYIK	AVVSLLNHQQELIEAEAYDVGFR
ASDFGFSAK	ASVSDAESMLPVAYIK	AVVTALYNHLPNNGSEVVLFDLNR
ASDGTEALVGGHNMNMDLFR	ASVSQVSLLAAAQK	AVVTQASSAIPM*MPLYLSLLFK
ASDQGPNAGKWDNSEIMAEILTLR	ASVVADKLR	AVVTQASSAIPMMPLYLSLLFK
ASDRTKLENEVM*K	ASWGLFR	AVVTSIRPLGFIAAAIADGVLPTEVLLPDGASPHDYALRPSDVQR
ASDRTKLENEVMK	ASWIGDYNEPSTFLSLLTSR	AVVVKPDHPLAGK
ASDVFLAVNSYR	ASWQQTIDQGALPDFILETNSIR	AVVVLDGQDNVIYSELVNEITTEPNYDAALAALK
ASDVKDSSLR	ASYHDVVNPQLQEASEAMINEEAWVLSDGK	AVVVTSGTTSEVLLNK
ASDWGWQIDPVGLR	ASYQVSPNDVVSIR	AVYGLAEWQSEDIK
ASEAVLAFDPDDPYEIR	ASYSM*EFLEYAEAPSNVAK	AWAAATGGHR
ASEIIHQIPHHQETPIIAVTAHAVK	ASYSMEFLEYAEAPSNVAK	AWASASTFR
ASEILEKENAQFFDILPILESLK	ASYTLNQTELR	AWDALVDEFDHYR
ASELNAALESAFAHPGPVLVDVVTAK	ASYVLNTPEIHAPLAK	AWDNAYIAAAMPLLLLVENIR
ASELQARPEQVISAIR	ASYYSNDFRPGLK	AWFVQSVTPR
ASFGNVHGVYKPGNVK	ATAAEVFGSPLEK	AWHAGVSSWQGR
ASFVTLQDVGGR	ATAALHQVLSSNKK	AWHAGVSYWDGR
ASGANSILTYLSNEAVAVAM*EDAVR	ATAANSTALGANSVADRENSVSVGSVGNER	AWHGAGTYR
ASGANSILTYLSNEAVAVAMEDAVR	ATADYEVTR	AWLDSSYLAGANQSYIEQLYEDFLTDPGSVDDSWR
ASGASVVLFDHALSAAQER	ATAIWMSFEK	AWNSTWYANTK
ASGFIAHAAAFNVTNHDEVNEAIEK	ATANAAFGNAASVLVGDYIYTR	AWNSTWYANTKEFADNLDSDFKVR
ASGFSLSDTLSMMDDKVQLMLGVR	ATAPSTVSPYGPEAR	AWQPGGAGTDFLTADHLDLPMDFENIAK
ASGGTGLGLAIVETAVSQHR	ATASALISTAMTAQSRRSVASANAIAPVPVPR	AWSITTNHPYHRE
ASGHDTGVSPLVALGAEYAWTK	ATAVGQDKYDTVER	AWTDASSIVDYLLFAR
ASGHDTGVSPLVALGAEYAWTKNWATR	ATDFVLAM*GQGR	AWTIPVGATAPQAAGK
ASGIQTGGPNTLNQR	ATDFVLAMGQGR	AWYQDEGHSVDTIQAVLAR
ASGLVLVDFWAEWCGPCK	ATDGILGSSPATTLTLTASSLPDIQAGSVVLYR	AYAATQAGHFAK
ASGQLQQTHLLK	ATDLAGIQFR	AYAGQEIVSNASCTTNCLAPLAK
ASGSELGDYQGTTGITTR	ATDPFVGNLTFFR	AYALSEQLKEIMAPLFQK
ASGTDEATTLVPFLK	ATDVAIVHFAQAIQALR	AYAMLATSADK
ASGTDEATTLVPFLKK	ATDVPVIAFSVGEEELR	AYAPFFLGVFGAK
ASHGGYLLQGK	ATEFDPYVLTK	AYAQGVGNAVPDIPDPIVNHSPTGTLR
ASIPYTVNER	ATEGELLSQVEPEDLIK	AYDAYSFHILPK
ASIRDAHFIGIR	ATELQGM*ER	AYDLGDNVCQK
ASISLGYIGIHETINALFGHQTHLFDDQK	ATELQGMER	AYDQLIHDVAIQNLPVLFAIDR
ASIWALGPLVAR	ATESHAVK	AYEDIALEYAFILSLI
ASIYNAMPIEGVK	ATEYETGLFFYF	AYEDTVDR
ASKPEYVKPDDVPAEVVAR	ATFGDVPDYVVNLTSDNLNLDAIFGWQPK	AYEEAATVTGVINGK
ASLAAGAAGAISGSAIVK	ATGGGDVSQAEVLLK	AYELAIQPAK
ASLATESFISAASFQETTR	ATGLDALFDATIEEMKK	AYENSFSSGNDVM*VLSPDSDFFR
ASLESNFALR	ATGLGYPLVVRPSYVLGGR	AYENSFSSGNDVMVLSPDSDFFR
ASLESTVDVEVSSAR	ATGM*TDDDFGKPIIAVVNSFTQFVPGHVHLR	AYENTALPIGAGQTISQPYMVAR
ASLGIYPAVDPLDSTSR	ATGMTDDDFGKPIIAVVNSFTQFVPGHVHLR	AYESGM*TSGNTR
ASLHIDDIPAAIK	ATGTLPDAGQILNTLINSILLLDDDLAIHYANPAAQQLLAQSSR	AYESGMTSGNTR
ASLIPHQLHIAYEVGQR	ATGVEFDVR	AYFDVNDPSTK
ASLNSLDVERK	ATGVEFDVRK	AYFFAADEIFPR
ASLPTIEAALK	ATGWSAFYIDGK	AYFVDAPYQVDK
ASLQDDMNILIANLGIVSSSTDTK	ATHHIAEIIEM*TER	AYGDLDAIIAPDANALPAAAQAAENLK
ASLSSALLASASQVWR	ATHHIAEIIEMTER	AYGDLDAIIAPDANALPAAAQAAENLKR
ASLTGTQNIK	ATHNDSM*SSEQVDNVR	AYGIEHPDAGVALR
ASLVDQTAETKR	ATHNDSM*SSEQVDNVRR	AYGLFNEQSELADALKR
ASM*GILTQPISFLGLPVVS	ATHNDSMSSEQVDNVR	AYGLSDTVTHNQGNYAAM*IADTITR
ASM*GILTQPISFLGLPVVSVPLK	ATHNTDKIIHDPR	AYGLSDTVTHNQGNYAAMIADTITR
ASM*NDM*ASM*NGK	ATHPVFAGDTLYAESTVLHK	AYGQDLIVNK
ASM*NDM*ASMNGK	ATHPVFAGDTLYAESTVLHKR	AYGSTNPINVVR
ASM*NDMASM*NGK	ATIAALEDM*KSPEMVAAK	AYHAFPPLTNGSGEPTGAMYGVLNMLR
ASMDELKEAAEALKR	ATIAALEDMK	AYHATLHQVELDPSEK
ASMGILTQPISFLGLPVVS	ATIAALEDMKSPEM*VAAK	AYHATLHQVELDPSEKNLNR
ASMGILTQPISFLGLPVVSVPLK	ATIAALEDMKSPEMV	AYHTPFAAQPPVASSGLPLTLISLDDWALVTLTGADR
ASMNDKASMNDMASMNGK	ATIAALEDMKSPEMVAAK	AYIDYVGSWGPMILGHNHPAIR
ASMNDM*ASM*NGK	ATIAALEDMKSPEMVAAKR	AYIVSQGHLIAHGTPQDILADEQVKR
ASMNDM*ASMNGK	ATIEGLLALQR	AYKHILIAVDLSPESK
ASMNDMASM*NGK	ATILATGGAGR	AYKPGSATIAQNKR
ASMNDMASMNGK	ATISDLGPLLLGR	AYLPILTQAQGWQLVGAFSPNQAK
ASMYVWAK	ATITAQKEQVAEMVSGAK	AYLQGIALMSDVDKNFNWDGQWWNITK
ASNAHVADTFR	ATLDFTGSIDGEEFEGGK	AYNTDYIAIAK
ASNAHVADTFRQENSVR	ATLEALFYGLGSDGSVSATK	AYNTVVPASGK
ASNGEIILSSEM*YASK	ATLESIAYQTR	AYPELAAEFK
ASNQGEPVILDK	ATLGEVGNAEHM*LR	AYQPFIDLLR
ASNTTQGGFDGPATTQTQPATQGGFTGPSASSTTVDK	ATLGEVGNAEHMLR	AYQTDPTSAFGGIIAF
ASNTTQGGFDGPATTQTQPATQGGFTGPSASSTTVDKVK	ATLNLGEAAIELGVLSPTLGTDVIDVR	AYQTDPTSAFGGIIAFNR
ASNTVLSSLNQAMQEPGFNSK	ATLPTYEEAIAR	AYRPGDILTTMSGQTVEVLNTDAEGR
ASPEITLLMNDSQNDQSK	ATLTLLLK	AYRRPEPYK
ASPEITLLMNDSQNDQSKQNDQIDVLLAK	ATLVGSTSGRPAIPK	AYSMANYPEEHGIILLNVR
ASPFNDRDAELQTIEFLK	ATMGLDPGLR	AYSTDSNMLGATHEAK
ASPQEVDKYSFISQLYFPEEFNSEIEQR	ATNLGLVGESSGLYPK	AYSTDSNMLGATHEAKDLEFLNSSVK
ASPSILDGIQVEYYGTATPLR	ATPAVGFAMGLER	AYSYVNAPSDHNLEFYLVTVPEGK
ASPTNFLALCPSRIKPLLSWK	ATPM*ADHTEMYR	AYVDILQNPDIR
ASQAHPALHAFITLLDLPQSR	ATPMADHTEMYR	AYVIGEGALVHELYK
ASQAVPGSGQGQLITVK	ATPQWFISMDQK	AYVLMDFNSGK
ASQGASTITQQLAR	ATPSVEVQPGMQPHEKPE	AYVSGLSDEDFSDLAAYYASLKP
ASQLPEVTVLAPASFK	ATPVELDFSQVEKG	AYYLLALESGK
ASQLVTNSNVQAFLQSVQHETVNAAIMTYTEALER	ATPVFMGVPAEFMAQAK	CADLGLETILVER
ASQNALEAFGK	ATQGENAIVTLGYALNPDGTMNDVLIQR	CANAISIARARPGALSTNVPSR
ASRAKAIIHTCAAVTITACVWLPFCNHSTAWR	ATQPVRDEFGKGHEDLIK	CCEPSVFGNRRTIGQR
ASSAATYGGR	ATQQLTVWEDIKK	CCQPIPGDQIIGFITQGR
ASSGLNEEEIQK	ATQTYNNHYQNGTHTK	CDLIADGIIGAVEEVGVNVPVVVR
ASSHLNDEIQGAWAAR	ATRGDIGDLR	CDLLAIKPEGFTCPIEGNEDQEDAE
ASTVANVVR	ATSDLNDLYR	CEETAGSHCVTGRSR
ASVEIDRK	ATSGEEWVGILQGPLPQESGIKR	CFEDNGLLFDLLEENGLGR
ASVGAPPDILGPLGQNWGLPPMDPHVMVAR	ATSPLLDIQNLSVAFSQAGVQR	CGNCDAHLGHVFPDGPQPTGER
ASVGNWFK	ATTEADDAIASAAAR	CIAM*GSSDGLSR
ASVQDLSSR	ATTEPLKM*EVYNPGEK	CIAMGSSDGLSR
ASVQDLSSRLESVVEGGLVLSQLMASPSPIR	ATTEPLKMEVYNPGEK	CISENDINTLAKEVTRLYLVK
ASVSDAESMLPVAYIK	ATTTAVALAEHHER	CKYCEKEFDHLAVLHAD
ASWIGDYNEPSTFLSLLTSR	ATTTEQLGFTGR	CLAAVSSACKWRRRAR
ASWQQTIDQGALPDFILETN	ATTWQTEDWVK	CLAPTM*SELR
ASWQQTIDQGALPDFILETNSIR	ATVFIFPDLNTGNTTYK	CLAQELSDELLAVYVANM*TPVYR
ASYHDVVNPQLQEASEAMINEEAWVLSDGK	ATVGIFFGSDTGNTENIAK	CLGAAPGEAGLEQQGLGWANK
ASYQVSPNDVVSIR	ATVINYLNEAR	CNQTGRPHGFLR
ASYSM*EFLEYAEAPSNVAK	ATVIQQFAALLE	CNSAAIVSR
ASYSMEFLEYAEAPSNVAK	ATVIQQFAALLEQHK	CQQLLQLIQETPVTGRRREATAIAQVAGWADR
ASYTLNQTELR	ATVLIETLPAVFQMDEILYHLR	CQSTNDAYPTGFR
ASYVLNTPEIHAPLAK	ATVLQPGWAQAQMAVVQADQYLK	CRGIPVQ
ASYYSNDFRPGLK	ATVMMPHPER	CRGQWLYSGDVEKNAQR
ATAAGAVAGGIAGQGVQGALNR	ATVQGEDGR	CSAEETAACCCVDVGTVMDNTDR
ATAALHQVLSSNKK	ATYIVVHDGM*GK	CSEFGDAIIK
ATADYEVTR	ATYIVVHDGMGK	CSTSDADFSVGR
ATAETMIQAGATR	ATYNVQGAFTATNEK	CTVAKLGM*GIR
ATAIWMSFEK	ATYNVQGAFTATNEKITDAVNSVLSDVIADMAQDTSVSSFIK	CVYVAIGQK
ATANAAFGNAASVLVGDYIYTR	AVAAAAELGVWMVNVHASGGAR	DAAAAVGK
ATAPSTVSPYGPEAR	AVAAAAPVLAGR	DAAAPIVAPTPAPAPIVDTK
ATASALISTAM*TAQSR	AVAAGM*NPM*	DAADYVLAGNR
ATASNGDVLFDKHEGFR	AVAAGM*NPM*D	DAAGDGTTTATVLAQSIITEGLK
ATDFVLAM*GQGR	AVAAGM*NPM*DLK	DAAGNTALR
ATDFVLAMGQGR	AVAAGM*NPM*DLKR	DAAGVHAVIVPR
ATDGILGSSPATTLTLTASSLPDIQAGSVVLYR	AVAAGM*NPMDLK	DAAHHLWEQQKR
ATDLAGIQFR	AVAAGMNPM*DLK	DAAHLAALEQSHLVALR
ATDMVLAFLPFEK	AVAAGMNPM*DLKR	DAAPNRSATGASVWVLSNRRANSEM*GNWLEQHEK
ATDPFVGNLTFFR	AVAAGMNPMDLK	DAAQLTEEGYYSVFGK
ATDRNYDALQASSEAVR	AVAAGMNPMDLKR	DADAALGR
ATDVAIVHFAQAIQALR	AVAAVNGPIA	DADGLAVDFNIEGEYPQFGNNDSR
ATDVPVIAFSVGEEELR	AVAAVNGPIAQ	DADKMALIPVK
ATEFDPYVLTK	AVAAVNGPIAQAVIGK	DADLQQALVNAELVPSR
ATEGELLSQVEPEDLIK	AVADSLTSQLLTAIKPLTEQAGLSR	DADVDGALAASVFHK
ATEGQGFK	AVAEAMGSQAVIVR	DAEAFEDKFWSGIELSR
ATELQGM*ER	AVAEEWQIPDVAGYAMSR	DAEALKDLGTELVDLGK
ATELQGMER	AVAEGANMPTTIQATDAFLEAGVLFAPGK	DAEANAEADRK
[truncated: 20,405 more rows]

## Sheet: YPCO_singlets_vs_YPPF_peptides
singlet_Similarity_Coverage	singlet_Number	singlet_Seq_Length	peptide_Seq_Length	Aligned_Length	singlet_Identity_Coverage	singlet_Residue_Coverage	peptide_Residue_Coverage	Score	Identity	Similarity	Gaps	singlet_Region	Alignment	peptide_Region
1	8	18	18	18	1	1	1	87	18	18	0	AATQNTPAATGQVQSLTR	||||||||||||||||||	AATQNTPAATGQVQSLTR
1	9	23	23	23	1	1	1	120	23	23	0	AAWMYYVAGQTQHEIAEALGVSR	|||||||||||||||||||||||	AAWMYYVAGQTQHEIAEALGVSR
1	13	14	14	14	1	1	1	73	14	14	0	AFAEIGGIVHTHSR	||||||||||||||	AFAEIGGIVHTHSR
1	14	20	20	20	1	1	1	116	20	20	0	AFALPNWWYLPVDAQLPSDR	||||||||||||||||||||	AFALPNWWYLPVDAQLPSDR
1	16	23	23	23	1	1	1	114	23	23	0	AGFATTQEAYDEAVGTLFSALDR	|||||||||||||||||||||||	AGFATTQEAYDEAVGTLFSALDR
1	17	22	22	22	1	1	1	102	22	22	0	AGIALPILNPESAILIQLSAVN	||||||||||||||||||||||	AGIALPILNPESAILIQLSAVN
1	18	16	16	16	1	1	1	82	16	16	0	AGLMLFNALVGRPEPR	||||||||||||||||	AGLMLFNALVGRPEPR
1	20	28	28	28	1	1	1	145	28	28	0	AHPEKDNLLVPIPTPQPLANALTLNLSK	||||||||||||||||||||||||||||	AHPEKDNLLVPIPTPQPLANALTLNLSK
1	21	23	23	23	1	1	1	122	23	23	0	AHPNIPALLNPVFATLDGPTLQK	|||||||||||||||||||||||	AHPNIPALLNPVFATLDGPTLQK
1	22	34	34	34	1	1	1	160	34	34	0	AIAIEPEVLLLDEPTSALDPISTLTIEELITTLK	||||||||||||||||||||||||||||||||||	AIAIEPEVLLLDEPTSALDPISTLTIEELITTLK
1	27	23	23	23	1	1	1	110	23	23	0	ALAQRPVLMLLDEPFSALDTALR	|||||||||||||||||||||||	ALAQRPVLMLLDEPFSALDTALR
1	35	19	19	19	1	1	1	92	19	19	0	ANVSIPASAASETPVSTPD	|||||||||||||||||||	ANVSIPASAASETPVSTPD
1	37	16	16	16	1	1	1	89	16	16	0	APEQFVPHNLAGEGPK	||||||||||||||||	APEQFVPHNLAGEGPK
1	38	16	16	16	1	1	1	79	16	16	0	APGQPLEALTAAFLER	||||||||||||||||	APGQPLEALTAAFLER
1	39	15	15	15	1	1	1	77	15	15	0	APLEVSQASGALNWR	|||||||||||||||	APLEVSQASGALNWR
1	44	13	13	13	1	1	1	67	13	13	0	AQYLIAKYPDTVE	|||||||||||||	AQYLIAKYPDTVE
1	46	14	14	14	1	1	1	71	14	14	0	ARPATEVFTELFGK	||||||||||||||	ARPATEVFTELFGK
1	55	14	14	14	1	1	1	75	14	14	0	AVIGQVHPHTAPAR	||||||||||||||	AVIGQVHPHTAPAR
1	56	15	15	15	1	1	1	70	15	15	0	AVNGMMLDMLAAISR	|||||||||||||||	AVNGMMLDMLAAISR
1	57	23	23	23	1	1	1	116	23	23	0	AYVSGLSDEDFSDLAAYYASLKP	|||||||||||||||||||||||	AYVSGLSDEDFSDLAAYYASLKP
1	63	9	9	9	1	1	1	46	9	9	0	CSILDDVLR	|||||||||	CSILDDVLR
1	64	9	9	9	1	1	1	46	9	9	0	CSINLVGSK	|||||||||	CSINLVGSK
1	69	14	14	14	1	1	1	74	14	14	0	DAAAFNLHLNSQHK	||||||||||||||	DAAAFNLHLNSQHK
1	71	16	16	16	1	1	1	73	16	16	0	DAIALNGSAEASQLSR	||||||||||||||||	DAIALNGSAEASQLSR
1	72	16	16	16	1	1	1	75	16	16	0	DALQAITFIDQLMAAR	||||||||||||||||	DALQAITFIDQLMAAR
1	73	23	23	23	1	1	1	121	23	23	0	DANIDFDESVFVPTVAGYYTDSK	|||||||||||||||||||||||	DANIDFDESVFVPTVAGYYTDSK
1	76	33	33	33	1	1	1	177	33	33	0	DDDTGWALRPLLAVDLPFSAVMDTLFLPYDYLR	|||||||||||||||||||||||||||||||||	DDDTGWALRPLLAVDLPFSAVMDTLFLPYDYLR
1	78	16	16	16	1	1	1	80	16	16	0	DDIDAEQSTQEPLSER	||||||||||||||||	DDIDAEQSTQEPLSER
1	81	15	15	15	1	1	1	73	15	15	0	DFIAMTGIPAVATLK	|||||||||||||||	DFIAMTGIPAVATLK
1	87	19	19	19	1	1	1	95	19	19	0	DGIPVLLENEARPLSIDEK	|||||||||||||||||||	DGIPVLLENEARPLSIDEK
1	90	15	15	15	1	1	1	80	15	15	0	DGQNDSDTVSPLDFK	|||||||||||||||	DGQNDSDTVSPLDFK
1	91	16	16	16	1	1	1	79	16	16	0	DGSALLTHLLDADLQR	||||||||||||||||	DGSALLTHLLDADLQR
1	93	14	14	14	1	1	1	66	14	14	0	DIAEQLVAQAVGGK	||||||||||||||	DIAEQLVAQAVGGK
1	95	12	12	12	1	1	1	67	12	12	0	DIAIDYWNSGIR	||||||||||||	DIAIDYWNSGIR
1	99	14	14	14	1	1	1	71	14	14	0	DLDLPIDGFIESSR	||||||||||||||	DLDLPIDGFIESSR
1	101	11	11	11	1	1	1	61	11	11	0	DLLNMSDADWR	|||||||||||	DLLNMSDADWR
1	104	13	13	13	1	1	1	71	13	13	0	DMVYNLPILTPPR	|||||||||||||	DMVYNLPILTPPR
1	106	18	18	18	1	1	1	92	18	18	0	DNQDGFQLLFSELGIANR	||||||||||||||||||	DNQDGFQLLFSELGIANR
1	107	16	16	16	1	1	1	87	16	16	0	DNQPLLEEVNQWLAGK	||||||||||||||||	DNQPLLEEVNQWLAGK
1	108	32	32	32	1	1	1	170	32	32	0	DNVIPVAINNVSAGSKTQPGGYADDHPELEQF	||||||||||||||||||||||||||||||||	DNVIPVAINNVSAGSKTQPGGYADDHPELEQF
1	113	15	15	15	1	1	1	84	15	15	0	DSGHLIPGHGGILDR	|||||||||||||||	DSGHLIPGHGGILDR
1	118	14	14	14	1	1	1	73	14	14	0	DTFAVTADSPGQFR	||||||||||||||	DTFAVTADSPGQFR
1	120	13	13	13	1	1	1	66	13	13	0	DTQTYQVDTVTAK	|||||||||||||	DTQTYQVDTVTAK
1	123	31	31	31	1	1	1	155	31	31	0	DVMSLAETLAEAAAMGNDLGDYTVLSHYQQR	|||||||||||||||||||||||||||||||	DVMSLAETLAEAAAMGNDLGDYTVLSHYQQR
1	124	15	15	15	1	1	1	78	15	15	0	DVSQGPIEFFMAMGR	|||||||||||||||	DVSQGPIEFFMAMGR
1	129	11	11	11	1	1	1	56	11	11	0	EAHQILRPQVR	|||||||||||	EAHQILRPQVR
1	130	35	35	35	1	1	1	175	35	35	0	EALYQDVAHHVLDGTQTPSLVVEQILQMLTGEMVK	|||||||||||||||||||||||||||||||||||	EALYQDVAHHVLDGTQTPSLVVEQILQMLTGEMVK
1	131	19	19	19	1	1	1	98	19	19	0	EAVNNLVAGIESGAWQPAQ	|||||||||||||||||||	EAVNNLVAGIESGAWQPAQ
1	132	31	31	31	1	1	1	154	31	31	0	EELTNEASDLMYHLLVLLQDQDLDFSTVIGR	|||||||||||||||||||||||||||||||	EELTNEASDLMYHLLVLLQDQDLDFSTVIGR
1	133	23	23	23	1	1	1	121	23	23	0	EGAPPIAPYLLFNAPTFDLTLVK	|||||||||||||||||||||||	EGAPPIAPYLLFNAPTFDLTLVK
1	134	15	15	15	1	1	1	82	15	15	0	EGLDVNSHGENAYNQ	|||||||||||||||	EGLDVNSHGENAYNQ
1	136	28	28	28	1	1	1	145	28	28	0	EGWMAVTADQRPGYAVTTAMNQLVANIR	||||||||||||||||||||||||||||	EGWMAVTADQRPGYAVTTAMNQLVANIR
1	142	15	15	15	1	1	1	82	15	15	0	EIVLFGDNVPWLLGR	|||||||||||||||	EIVLFGDNVPWLLGR
1	143	25	25	25	1	1	1	111	25	25	0	ELDTLQSLLTTSQSSELQAAAALLK	|||||||||||||||||||||||||	ELDTLQSLLTTSQSSELQAAAALLK
1	144	15	15	15	1	1	1	73	15	15	0	ELLPAVLSTLFNGEK	|||||||||||||||	ELLPAVLSTLFNGEK
1	146	20	20	20	1	1	1	108	20	20	0	ELQVLWQPEIGEGETDGVNR	||||||||||||||||||||	ELQVLWQPEIGEGETDGVNR
1	152	18	18	18	1	1	1	104	18	18	0	ETLFSTWPGPITWVIPAR	||||||||||||||||||	ETLFSTWPGPITWVIPAR
1	162	25	25	25	1	1	1	135	25	25	0	FHKGIEGIGFTQTRNTVNGGFSPLR	|||||||||||||||||||||||||	FHKGIEGIGFTQTRNTVNGGFSPLR
1	163	35	35	35	1	1	1	178	35	35	0	FHTSWAELPASLQFALEPILSAENFPAMLTAEQVK	|||||||||||||||||||||||||||||||||||	FHTSWAELPASLQFALEPILSAENFPAMLTAEQVK
1	168	10	10	10	1	1	1	54	10	10	0	FKDLSPHLQR	||||||||||	FKDLSPHLQR
1	175	23	23	23	1	1	1	116	23	23	0	FNVLGLPTILFFDSQGNEITAAR	|||||||||||||||||||||||	FNVLGLPTILFFDSQGNEITAAR
1	177	11	11	11	1	1	1	58	11	11	0	FPLNKEVFVNK	|||||||||||	FPLNKEVFVNK
1	178	17	17	17	1	1	1	89	17	17	0	FRCFSFLSGELGNTLSR	|||||||||||||||||	FRCFSFLSGELGNTLSR
1	181	18	18	18	1	1	1	84	18	18	0	FSRNAAIAAAALSFGGSR	||||||||||||||||||	FSRNAAIAAAALSFGGSR
1	188	11	11	11	1	1	1	55	11	11	0	GAFKDFMILLK	|||||||||||	GAFKDFMILLK
1	193	12	12	12	1	1	1	62	12	12	0	GDYASALQQGNK	||||||||||||	GDYASALQQGNK
1	194	20	20	20	1	1	1	104	20	20	0	GGFFGALMDFVQTETESQGK	||||||||||||||||||||	GGFFGALMDFVQTETESQGK
1	195	19	19	19	1	1	1	94	19	19	0	GGGSLAPENTLAAIDVGAR	|||||||||||||||||||	GGGSLAPENTLAAIDVGAR
1	196	16	16	16	1	1	1	86	16	16	0	GGHFLRPTVLADVDNR	||||||||||||||||	GGHFLRPTVLADVDNR
1	197	11	11	11	1	1	1	62	11	11	0	GHLYAHQGLEK	|||||||||||	GHLYAHQGLEK
1	199	17	17	17	1	1	1	88	17	17	0	GIHAQNQPAQQAQAGQR	|||||||||||||||||	GIHAQNQPAQQAQAGQR
1	200	15	15	15	1	1	1	72	15	15	0	GKGLATLLYEELVVK	|||||||||||||||	GKGLATLLYEELVVK
1	202	7	7	7	1	1	1	39	7	7	0	GKYEGEK	|||||||	GKYEGEK
1	207	13	13	13	1	1	1	69	13	13	0	GLRLTNRGTGDGR	|||||||||||||	GLRLTNRGTGDGR
1	213	10	10	10	1	1	1	47	10	10	0	GPSAVNVVAL	||||||||||	GPSAVNVVAL
1	215	16	16	16	1	1	1	82	16	16	0	GQFTDLDNQVISNLFK	||||||||||||||||	GQFTDLDNQVISNLFK
1	217	12	12	12	1	1	1	58	12	12	0	GQQLATLADAGK	||||||||||||	GQQLATLADAGK
1	224	23	23	23	1	1	1	129	23	23	0	GVHHFDTIRDEIAHEIGESGPHR	|||||||||||||||||||||||	GVHHFDTIRDEIAHEIGESGPHR
1	225	18	18	18	1	1	1	91	18	18	0	GVPVTIFLGHRAYSLLVK	||||||||||||||||||	GVPVTIFLGHRAYSLLVK
1	227	23	23	23	1	1	1	111	23	23	0	GVSLITGIDGSDEDLDKLAAELK	|||||||||||||||||||||||	GVSLITGIDGSDEDLDKLAAELK
1	230	17	17	17	1	1	1	90	17	17	0	HALKGEAVPLGTYQDKK	|||||||||||||||||	HALKGEAVPLGTYQDKK
1	234	8	8	8	1	1	1	40	8	8	0	HGLQSLLR	||||||||	HGLQSLLR
1	241	11	11	11	1	1	1	58	11	11	0	HLHTAIGVKTR	|||||||||||	HLHTAIGVKTR
1	242	11	11	11	1	1	1	54	11	11	0	HLNRLEQVLIR	|||||||||||	HLNRLEQVLIR
1	248	7	7	7	1	1	1	37	7	7	0	HQGQLIK	|||||||	HQGQLIK
1	250	11	11	11	1	1	1	60	11	11	0	HSHIVNMFEQR	|||||||||||	HSHIVNMFEQR
1	253	15	15	15	1	1	1	85	15	15	0	HVRPHEQVIGIFPPE	|||||||||||||||	HVRPHEQVIGIFPPE
1	255	15	15	15	1	1	1	91	15	15	0	HYNLHFNPEPGTLLH	|||||||||||||||	HYNLHFNPEPGTLLH
1	257	17	17	17	1	1	1	89	17	17	0	IAAHLGHPVSLEIEPGR	|||||||||||||||||	IAAHLGHPVSLEIEPGR
1	259	13	13	13	1	1	1	68	13	13	0	IALKPYLGGKPLK	|||||||||||||	IALKPYLGGKPLK
1	260	15	15	15	1	1	1	80	15	15	0	IAQIQQHWLSSHIQR	|||||||||||||||	IAQIQQHWLSSHIQR
1	263	17	17	17	1	1	1	93	17	17	0	IDRHEVQQHGLTLDNPR	|||||||||||||||||	IDRHEVQQHGLTLDNPR
1	264	28	28	28	1	1	1	132	28	28	0	IDSLITPQQLAEKLPISEVIADNVTASR	||||||||||||||||||||||||||||	IDSLITPQQLAEKLPISEVIADNVTASR
1	265	24	24	24	1	1	1	130	24	24	0	IENHYFTHLGFLDSDNQLLDNVTR	||||||||||||||||||||||||	IENHYFTHLGFLDSDNQLLDNVTR
1	266	16	16	16	1	1	1	74	16	16	0	IEVRQGGLLIVDIIIK	||||||||||||||||	IEVRQGGLLIVDIIIK
1	267	16	16	16	1	1	1	98	16	16	0	IEWEHVVPAWQFGHQR	||||||||||||||||	IEWEHVVPAWQFGHQR
1	268	15	15	15	1	1	1	73	15	15	0	IGGQAINLNMTIQIK	|||||||||||||||	IGGQAINLNMTIQIK
1	270	17	17	17	1	1	1	98	17	17	0	IKEHWYYIDGIRPSLGR	|||||||||||||||||	IKEHWYYIDGIRPSLGR
1	272	13	13	13	1	1	1	63	13	13	0	ILADAQEVYEQQK	|||||||||||||	ILADAQEVYEQQK
1	273	13	13	13	1	1	1	67	13	13	0	ILAESPYDDSLYT	|||||||||||||	ILAESPYDDSLYT
1	282	16	16	16	1	1	1	88	16	16	0	IQALEEILDTEHPNWR	||||||||||||||||	IQALEEILDTEHPNWR
1	283	16	16	16	1	1	1	81	16	16	0	IRDILGEDLVDLHNLK	||||||||||||||||	IRDILGEDLVDLHNLK
1	292	19	19	19	1	1	1	96	19	19	0	ISWEEAFETIAGSMQNIIK	|||||||||||||||||||	ISWEEAFETIAGSMQNIIK
1	293	14	14	14	1	1	1	76	14	14	0	ITGFYRPLANGPLK	||||||||||||||	ITGFYRPLANGPLK
1	296	18	18	18	1	1	1	96	18	18	0	ITPLLDAPDADELINWLR	||||||||||||||||||	ITPLLDAPDADELINWLR
1	307	19	19	19	1	1	1	87	19	19	0	KFADTAVENAVSIRLSSSR	|||||||||||||||||||	KFADTAVENAVSIRLSSSR
1	309	10	10	10	1	1	1	50	10	10	0	KGILGSLFGK	||||||||||	KGILGSLFGK
1	314	15	15	15	1	1	1	80	15	15	0	KLEHVASWQGINVER	|||||||||||||||	KLEHVASWQGINVER
1	316	14	14	14	1	1	1	68	14	14	0	KLSLTHAGEATLER	||||||||||||||	KLSLTHAGEATLER
1	317	10	10	10	1	1	1	51	10	10	0	KLVDHLSNER	||||||||||	KLVDHLSNER
1	321	31	31	31	1	1	1	159	31	31	0	KPVSLTPDTDLDTDLSIDELEIEDLMNDFFK	|||||||||||||||||||||||||||||||	KPVSLTPDTDLDTDLSIDELEIEDLMNDFFK
1	326	26	26	26	1	1	1	142	26	26	0	KVLFAHPGGHDLDATVVYGVNHQDLR	||||||||||||||||||||||||||	KVLFAHPGGHDLDATVVYGVNHQDLR
1	327	13	13	13	1	1	1	66	13	13	0	KVRRVCIAINPLK	|||||||||||||	KVRRVCIAINPLK
1	329	13	13	13	1	1	1	71	13	13	0	KYHLTPDELQLFK	|||||||||||||	KYHLTPDELQLFK
1	331	32	32	32	1	1	1	169	32	32	0	LAGFKPQNPPMVIMGGPLMGFTLPSLDVPIVK	||||||||||||||||||||||||||||||||	LAGFKPQNPPMVIMGGPLMGFTLPSLDVPIVK
1	334	16	16	16	1	1	1	79	16	16	0	LAQGDGLTPSTVSGVK	||||||||||||||||	LAQGDGLTPSTVSGVK
1	338	8	8	8	1	1	1	37	8	8	0	LDIADAVK	||||||||	LDIADAVK
1	339	12	12	12	1	1	1	57	12	12	0	LDQQLIAQGAQR	||||||||||||	LDQQLIAQGAQR
1	340	23	23	23	1	1	1	123	23	23	0	LEYDVLPPAVFPSSLYEYDFGLK	|||||||||||||||||||||||	LEYDVLPPAVFPSSLYEYDFGLK
1	343	11	11	11	1	1	1	51	11	11	0	LFLNSLLELFL	|||||||||||	LFLNSLLELFL
1	344	12	12	12	1	1	1	63	12	12	0	LFLSQQECNNIR	||||||||||||	LFLSQQECNNIR
1	345	14	14	14	1	1	1	73	14	14	0	LFSHASQAQYQHLR	||||||||||||||	LFSHASQAQYQHLR
1	348	16	16	16	1	1	1	82	16	16	0	LHQHALPSMDFVVLVK	||||||||||||||||	LHQHALPSMDFVVLVK
1	352	14	14	14	1	1	1	66	14	14	0	LIQLYDLLATIQQK	||||||||||||||	LIQLYDLLATIQQK
1	353	35	35	35	1	1	1	175	35	35	0	LISAMDFMPTALEAAEIDAPNNLDGVSLLPYLTGK	|||||||||||||||||||||||||||||||||||	LISAMDFMPTALEAAEIDAPNNLDGVSLLPYLTGK
1	357	14	14	14	1	1	1	65	14	14	0	LKQVLNQAVQSFLK	||||||||||||||	LKQVLNQAVQSFLK
1	358	18	18	18	1	1	1	87	18	18	0	LKTGALPGAADDIILRAK	||||||||||||||||||	LKTGALPGAADDIILRAK
1	360	16	16	16	1	1	1	76	16	16	0	LLENLSAPLFALLPAK	||||||||||||||||	LLENLSAPLFALLPAK
1	361	15	15	15	1	1	1	71	15	15	0	LLHDLDLLEALLIEK	|||||||||||||||	LLHDLDLLEALLIEK
1	364	17	17	17	1	1	1	93	17	17	0	LLTEPYPPTPFETFSIR	|||||||||||||||||	LLTEPYPPTPFETFSIR
1	367	17	17	17	1	1	1	85	17	17	0	LMQVLTGPSPNFSLTLR	|||||||||||||||||	LMQVLTGPSPNFSLTLR
1	368	17	17	17	1	1	1	76	17	17	0	LNGRSSSKSSSLVSLQR	|||||||||||||||||	LNGRSSSKSSSLVSLQR
1	369	10	10	10	1	1	1	54	10	10	0	LNVAHEDDGK	||||||||||	LNVAHEDDGK
1	374	20	20	20	1	1	1	93	20	20	0	LSALMDGETLDSELLGILSK	||||||||||||||||||||	LSALMDGETLDSELLGILSK
1	375	20	20	20	1	1	1	108	20	20	0	LSEILYGAFTDDTPNDYYAK	||||||||||||||||||||	LSEILYGAFTDDTPNDYYAK
1	379	23	23	23	1	1	1	110	23	23	0	LTEIISAPVEALGYELVGIEFIR	|||||||||||||||||||||||	LTEIISAPVEALGYELVGIEFIR
1	383	8	8	8	1	1	1	40	8	8	0	LTVTQNNK	||||||||	LTVTQNNK
1	385	9	9	9	1	1	1	37	9	9	0	LVLASIISK	|||||||||	LVLASIISK
1	388	19	19	19	1	1	1	94	19	19	0	LYGIRSTSNNMKTTVISNK	|||||||||||||||||||	LYGIRSTSNNMKTTVISNK
1	389	19	19	19	1	1	1	102	19	19	0	LYIEEVEGGIYPAEEHTFQ	|||||||||||||||||||	LYIEEVEGGIYPAEEHTFQ
1	404	12	12	12	1	1	1	57	12	12	0	MEQQLQNSSLKR	||||||||||||	MEQQLQNSSLKR
1	405	32	32	32	1	1	1	154	32	32	0	MFDLSSIVDNEQTSDALEDVVMGLIINAGQAR	||||||||||||||||||||||||||||||||	MFDLSSIVDNEQTSDALEDVVMGLIINAGQAR
1	407	19	19	19	1	1	1	95	19	19	0	MHGLEEIIELQDLLADLPR	|||||||||||||||||||	MHGLEEIIELQDLLADLPR
1	413	24	24	24	1	1	1	120	24	24	0	MLDLADNLSEWLSQAPLSLEEEQR	||||||||||||||||||||||||	MLDLADNLSEWLSQAPLSLEEEQR
1	420	18	18	18	1	1	1	84	18	18	0	MVENALLEIPSGLVEAAR	||||||||||||||||||	MVENALLEIPSGLVEAAR
1	424	13	13	13	1	1	1	69	13	13	0	NDLGLVVACLPYA	|||||||||||||	NDLGLVVACLPYA
1	429	13	13	13	1	1	1	66	13	13	0	NGNVQAITQDDAK	|||||||||||||	NGNVQAITQDDAK
1	430	8	8	8	1	1	1	42	8	8	0	NHQLLGIR	||||||||	NHQLLGIR
1	431	10	10	10	1	1	1	54	10	10	0	NHSRPLSTQG	||||||||||	NHSRPLSTQG
1	432	17	17	17	1	1	1	78	17	17	0	NIANPIAQILSLTLLLR	|||||||||||||||||	NIANPIAQILSLTLLLR
1	433	10	10	10	1	1	1	49	10	10	0	NIDVDKIEAK	||||||||||	NIDVDKIEAK
1	436	15	15	15	1	1	1	75	15	15	0	NIRAQLLVCSKHLLK	|||||||||||||||	NIRAQLLVCSKHLLK
1	438	17	17	17	1	1	1	79	17	17	0	NITQLDELVQEAEALLR	|||||||||||||||||	NITQLDELVQEAEALLR
1	449	12	12	12	1	1	1	65	12	12	0	NSLPGYLSYSPR	||||||||||||	NSLPGYLSYSPR
1	450	22	22	22	1	1	1	102	22	22	0	NSSVITELLSLSCSSELSVTAP	||||||||||||||||||||||	NSSVITELLSLSCSSELSVTAP
1	451	18	18	18	1	1	1	94	18	18	0	NTAGTEAIYLLLHYAFDK	||||||||||||||||||	NTAGTEAIYLLLHYAFDK
1	454	13	13	13	1	1	1	77	13	13	0	NVETSELFDIWWD	|||||||||||||	NVETSELFDIWWD
1	460	15	15	15	1	1	1	75	15	15	0	PPQSVLGINQAFVVR	|||||||||||||||	PPQSVLGINQAFVVR
1	465	16	16	16	1	1	1	90	16	16	0	QGANSPTLDDTGYNPD	||||||||||||||||	QGANSPTLDDTGYNPD
1	468	22	22	22	1	1	1	112	22	22	0	QIRPLTPLELEGLLYSAGNYVR	||||||||||||||||||||||	QIRPLTPLELEGLLYSAGNYVR
1	471	18	18	18	1	1	1	89	18	18	0	QLLDQLQHELAQGEQQLR	||||||||||||||||||	QLLDQLQHELAQGEQQLR
1	474	22	22	22	1	1	1	117	22	22	0	QLSPFLLLDYAGPMDFTPTTQR	||||||||||||||||||||||	QLSPFLLLDYAGPMDFTPTTQR
1	475	17	17	17	1	1	1	85	17	17	0	QNGMTNAGDISAASPAK	|||||||||||||||||	QNGMTNAGDISAASPAK
1	479	10	10	10	1	1	1	47	10	10	0	QQFSQSTLVK	||||||||||	QQFSQSTLVK
1	480	23	23	23	1	1	1	108	23	23	0	QQHALHVAQALDITQSAVSAALK	|||||||||||||||||||||||	QQHALHVAQALDITQSAVSAALK
1	482	26	26	26	1	1	1	129	26	26	0	QQLINAFDNSVLYTDSFIANVIDQMR	||||||||||||||||||||||||||	QQLINAFDNSVLYTDSFIANVIDQMR
1	499	20	20	20	1	1	1	103	20	20	0	RFIQNTGVFLVLLQLEWAGT	||||||||||||||||||||	RFIQNTGVFLVLLQLEWAGT
1	502	31	31	31	1	1	1	169	31	31	0	RFPGVLALDGVNLTLNKGEVHCLAGQNGCGK	|||||||||||||||||||||||||||||||	RFPGVLALDGVNLTLNKGEVHCLAGQNGCGK
1	504	12	12	12	1	1	1	61	12	12	0	RGVISTANYPAR	||||||||||||	RGVISTANYPAR
1	506	10	10	10	1	1	1	51	10	10	0	RHDELTEVAR	||||||||||	RHDELTEVAR
1	507	13	13	13	1	1	1	65	13	13	0	RHDLVPNLLSLVK	|||||||||||||	RHDLVPNLLSLVK
1	508	24	24	24	1	1	1	113	24	24	0	RIETQLEQPVEQSTLVSTAAVNKE	||||||||||||||||||||||||	RIETQLEQPVEQSTLVSTAAVNKE
1	510	13	13	13	1	1	1	66	13	13	0	RILYAHQLLLNGK	|||||||||||||	RILYAHQLLLNGK
1	512	15	15	15	1	1	1	75	15	15	0	RITAITHQSQFIQNR	|||||||||||||||	RITAITHQSQFIQNR
1	515	19	19	19	1	1	1	101	19	19	0	RLGPGTKLGLLARLPWAKR	|||||||||||||||||||	RLGPGTKLGLLARLPWAKR
1	519	10	10	10	1	1	1	51	10	10	0	RPEHLALAQR	||||||||||	RPEHLALAQR
1	520	16	16	16	1	1	1	84	16	16	0	RPHMVPLPDQAITILK	||||||||||||||||	RPHMVPLPDQAITILK
1	529	14	14	14	1	1	1	78	14	14	0	RSCDPYEPRRVRLR	||||||||||||||	RSCDPYEPRRVRLR
1	535	21	21	21	1	1	1	114	21	21	0	RVEPWNVTLVDTGEDSMTGGR	|||||||||||||||||||||	RVEPWNVTLVDTGEDSMTGGR
1	540	28	28	28	1	1	1	164	28	28	0	RWQALLLSDYRHWLKTRNQFSFLWAVHC	||||||||||||||||||||||||||||	RWQALLLSDYRHWLKTRNQFSFLWAVHC
1	543	30	30	30	1	1	1	139	30	30	0	SADNLSPLVVNSEMQEIVSVTSTLNQLLLR	||||||||||||||||||||||||||||||	SADNLSPLVVNSEMQEIVSVTSTLNQLLLR
1	549	22	22	22	1	1	1	104	22	22	0	SASANSFANAEVILLPGINSEK	||||||||||||||||||||||	SASANSFANAEVILLPGINSEK
1	552	20	20	20	1	1	1	102	20	20	0	SEHLSKDPLHGITLEQLLTK	||||||||||||||||||||	SEHLSKDPLHGITLEQLLTK
1	560	21	21	21	1	1	1	109	21	21	0	SGWGQLANSNVFIEFIDTALR	|||||||||||||||||||||	SGWGQLANSNVFIEFIDTALR
1	561	13	13	13	1	1	1	71	13	13	0	SHLGGAFSGYSYR	|||||||||||||	SHLGGAFSGYSYR
1	564	20	20	20	1	1	1	91	20	20	0	SKTAPLVNVSNSSLIISINA	||||||||||||||||||||	SKTAPLVNVSNSSLIISINA
1	566	12	12	12	1	1	1	65	12	12	0	SLQHYEGHELAR	||||||||||||	SLQHYEGHELAR
1	568	13	13	13	1	1	1	60	13	13	0	SMLLLNMLNSQIK	|||||||||||||	SMLLLNMLNSQIK
1	573	8	8	8	1	1	1	41	8	8	0	SPAHILEK	||||||||	SPAHILEK
1	577	18	18	18	1	1	1	92	18	18	0	SQVVQSGPANNDLDNELD	||||||||||||||||||	SQVVQSGPANNDLDNELD
1	579	11	11	11	1	1	1	60	11	11	0	SRQDYYTAGGR	|||||||||||	SRQDYYTAGGR
1	589	13	13	13	1	1	1	68	13	13	0	SVIHIVNGHVTGR	|||||||||||||	SVIHIVNGHVTGR
1	599	19	19	19	1	1	1	100	19	19	0	TATPADFAEIWPLFQAVIR	|||||||||||||||||||	TATPADFAEIWPLFQAVIR
1	600	29	29	29	1	1	1	136	29	29	0	TAVNQLISALAQSIPLLDIEPLQANKLEK	|||||||||||||||||||||||||||||	TAVNQLISALAQSIPLLDIEPLQANKLEK
1	601	11	11	11	1	1	1	54	11	11	0	TDEGTSVQQIR	|||||||||||	TDEGTSVQQIR
1	605	28	28	28	1	1	1	147	28	28	0	TGAAAIKRSHHGHGLHELNNRRANLLAR	||||||||||||||||||||||||||||	TGAAAIKRSHHGHGLHELNNRRANLLAR
1	607	25	25	25	1	1	1	129	25	25	0	TGKPVTAEGEAAADWVLNSLADLPK	|||||||||||||||||||||||||	TGKPVTAEGEAAADWVLNSLADLPK
1	609	15	15	15	1	1	1	80	15	15	0	THGLTESNLDKYDAR	|||||||||||||||	THGLTESNLDKYDAR
1	610	14	14	14	1	1	1	76	14	14	0	THGSGNPGATNVLR	||||||||||||||	THGSGNPGATNVLR
1	611	31	31	31	1	1	1	159	31	31	0	TIAEQHGATPAQVILSWAMQLGYGVIPSSTK	|||||||||||||||||||||||||||||||	TIAEQHGATPAQVILSWAMQLGYGVIPSSTK
1	612	22	22	22	1	1	1	112	22	22	0	TIAETLNVTHTTVSNVFNRPEK	||||||||||||||||||||||	TIAETLNVTHTTVSNVFNRPEK
1	614	13	13	13	1	1	1	64	13	13	0	TLFAVEQTPANQS	|||||||||||||	TLFAVEQTPANQS
1	619	25	25	25	1	1	1	142	25	25	0	TRQHAIFCRYPPLALAFQKAWNTFF	|||||||||||||||||||||||||	TRQHAIFCRYPPLALAFQKAWNTFF
1	627	19	19	19	1	1	1	94	19	19	0	TVGSGGVYLMPEIAQQLAR	|||||||||||||||||||	TVGSGGVYLMPEIAQQLAR
1	628	28	28	28	1	1	1	137	28	28	0	TVLAEYLGSLGATIHQAENGLAALYQLK	||||||||||||||||||||||||||||	TVLAEYLGSLGATIHQAENGLAALYQLK
1	629	22	22	22	1	1	1	108	22	22	0	TVLSPAATAETLYALWLGASLR	||||||||||||||||||||||	TVLSPAATAETLYALWLGASLR
1	634	16	16	16	1	1	1	77	16	16	0	VADLTVPQLILSFIPK	||||||||||||||||	VADLTVPQLILSFIPK
1	636	15	15	15	1	1	1	72	15	15	0	VAILDGIPVVPILER	|||||||||||||||	VAILDGIPVVPILER
1	639	10	10	10	1	1	1	54	10	10	0	VDSHPHVILR	||||||||||	VDSHPHVILR
1	640	13	13	13	1	1	1	66	13	13	0	VELSHKPISHALK	|||||||||||||	VELSHKPISHALK
1	643	36	36	36	1	1	1	176	36	36	0	VGEAGAQLLSSLIAPNDVLGVSWGQTVLALSHAITR	||||||||||||||||||||||||||||||||||||	VGEAGAQLLSSLIAPNDVLGVSWGQTVLALSHAITR
1	644	14	14	14	1	1	1	70	14	14	0	VGETLSGYLAPVKK	||||||||||||||	VGETLSGYLAPVKK
1	648	28	28	28	1	1	1	146	28	28	0	VIKPLPTDPLVLYSSPPLIVVFNAHNTR	||||||||||||||||||||||||||||	VIKPLPTDPLVLYSSPPLIVVFNAHNTR
1	653	15	15	15	1	1	1	80	15	15	0	VLIDLPEEYLLWFAR	|||||||||||||||	VLIDLPEEYLLWFAR
1	654	19	19	19	1	1	1	86	19	19	0	VLLVGSGALPTTALVLVAK	|||||||||||||||||||	VLLVGSGALPTTALVLVAK
1	658	13	13	13	1	1	1	61	13	13	0	VMGKTIVIVGGVA	|||||||||||||	VMGKTIVIVGGVA
1	660	8	8	8	1	1	1	38	8	8	0	VNMDALAR	||||||||	VNMDALAR
1	661	15	15	15	1	1	1	75	15	15	0	VNPSAVPLGLSYSER	|||||||||||||||	VNPSAVPLGLSYSER
1	662	27	27	27	1	1	1	130	27	27	0	VNSEALQQAGALGVIILGQEVHAIFGK	|||||||||||||||||||||||||||	VNSEALQQAGALGVIILGQEVHAIFGK
1	672	19	19	19	1	1	1	98	19	19	0	VSKDSHSACASCGLSVNAK	|||||||||||||||||||	VSKDSHSACASCGLSVNAK
1	673	32	32	32	1	1	1	160	32	32	0	VSNEVFILPLNAVMESLQPLAEDLHPLAGGER	||||||||||||||||||||||||||||||||	VSNEVFILPLNAVMESLQPLAEDLHPLAGGER
1	674	15	15	15	1	1	1	75	15	15	0	VSSAPLWQLNLLEIK	|||||||||||||||	VSSAPLWQLNLLEIK
1	675	12	12	12	1	1	1	65	12	12	0	VSSSHFYDRDGK	||||||||||||	VSSSHFYDRDGK
1	681	15	15	15	1	1	1	72	15	15	0	VVDYETLMSVMDALR	|||||||||||||||	VVDYETLMSVMDALR
1	684	8	8	8	1	1	1	48	8	8	0	WGIGYLQK	||||||||	WGIGYLQK
1	686	18	18	18	1	1	1	92	18	18	0	WLEAVLPLFQPVSEVTIR	||||||||||||||||||	WLEAVLPLFQPVSEVTIR
1	691	24	24	24	1	1	1	130	24	24	0	YGLPIGHALTLIQPGEHIHSQNAK	||||||||||||||||||||||||	YGLPIGHALTLIQPGEHIHSQNAK
1	694	24	24	24	1	1	1	128	24	24	0	YHLLPHLSAAHNVEVPAVYAGLGK	||||||||||||||||||||||||	YHLLPHLSAAHNVEVPAVYAGLGK
1	695	10	10	10	1	1	1	60	10	10	0	YHTGINPNGK	||||||||||	YHTGINPNGK
1	697	15	15	15	1	1	1	77	15	15	0	YNLTPTHSEVIEAVK	|||||||||||||||	YNLTPTHSEVIEAVK
1	701	15	15	15	1	1	1	68	15	15	0	YQVSSLAELQALLFA	|||||||||||||||	YQVSSLAELQALLFA
1	703	23	23	23	1	1	1	116	23	23	0	YSTTDNTTSGTVSVGNAATGETR	|||||||||||||||||||||||	YSTTDNTTSGTVSVGNAATGETR
1	705	30	30	30	1	1	1	152	30	30	0	YYQQTDDMFELSAALIESLIQNHAFANANK	||||||||||||||||||||||||||||||	YYQQTDDMFELSAALIESLIQNHAFANANK
1	163	35	36	35	1	1	0.972	168	35	35	1	FHTSWAELPASLQFALEPILSAENFPAM-LTAEQVK	|||||||||||||||||||||||||||| |||||||	FHTSWAELPASLQFALEPILSAENFPAM*LTAEQVK
1	348	16	17	16	1	1	0.941	72	16	16	1	LHQHALPSM-DFVVLVK	||||||||| |||||||	LHQHALPSM*DFVVLVK
1	520	16	17	16	1	1	0.941	74	16	16	1	RPHM-VPLPDQAITILK	|||| ||||||||||||	RPHM*VPLPDQAITILK
1	101	11	12	11	1	1	0.917	51	11	11	1	DLLNM-SDADWR	||||| ||||||	DLLNM*SDADWR
1	250	11	12	11	1	1	0.917	50	11	11	1	HSHIVNM-FEQR	||||||| ||||	HSHIVNM*FEQR
1	54	22	23	22	1	1	0.957	116	22	22	0	ATSGEEWVGILQGPLPQESGIK	||||||||||||||||||||||	ATSGEEWVGILQGPLPQESGIK
1	364	17	18	17	1	1	0.944	93	17	17	0	LLTEPYPPTPFETFSIR	|||||||||||||||||	LLTEPYPPTPFETFSIR
1	188	11	12	11	1	1	0.917	55	11	11	0	GAFKDFMILLK	|||||||||||	GAFKDFMILLK
1	310	22	24	22	1	1	0.917	110	22	22	0	KGSQIVTETVGHYLSAQLSGDK	||||||||||||||||||||||	KGSQIVTETVGHYLSAQLSGDK
1	433	10	11	10	1	1	0.909	49	10	10	0	NIDVDKIEAK	||||||||||	NIDVDKIEAK
1	361	15	17	15	1	1	0.882	71	15	15	0	LLHDLDLLEALLIEK	|||||||||||||||	LLHDLDLLEALLIEK
1	513	10	15	10	1	1	0.667	47	10	10	0	RLEEGLVTLR	||||||||||	RLEEGLVTLR
1	93	14	25	14	1	1	0.56	66	14	14	0	DIAEQLVAQAVGGK	||||||||||||||	DIAEQLVAQAVGGK
1	97	33	33	32	1	0.97	0.97	159	33	33	0	DKAVFPAIAALGGM*LAPALIYLLFNGADEVTR	|||||||||||||||||||||||||||||||||	DKAVFPAIAALGGM*LAPALIYLLFNGADEVTR
1	406	23	23	22	1	0.957	0.957	128	23	23	0	MGKLM*GRWPWRIKVSWMKQSKR	|||||||||||||||||||||||	MGKLM*GRWPWRIKVSWMKQSKR
1	102	22	22	21	1	0.955	0.955	106	22	22	0	DLSAEPTSVILLGGYVVM*DPK	||||||||||||||||||||||	DLSAEPTSVILLGGYVVM*DPK
1	109	22	22	21	1	0.955	0.955	113	22	22	0	DPAIM*PFGSAFPDPSLLLQPR	||||||||||||||||||||||	DPAIM*PFGSAFPDPSLLLQPR
1	115	18	18	17	1	0.944	0.944	97	18	18	0	DSNIWFM*QLGHDVYQAK	||||||||||||||||||	DSNIWFM*QLGHDVYQAK
1	602	17	17	16	1	0.941	0.941	87	17	17	0	TEDVM*PEGGSPDRLDE	|||||||||||||||||	TEDVM*PEGGSPDRLDE
1	678	16	16	15	1	0.938	0.938	82	16	16	0	VTHTAM*SFYGEVKHQ	||||||||||||||||	VTHTAM*SFYGEVKHQ
1	84	30	30	28	1	0.933	0.933	141	30	30	0	DGGIALSGATADFSTEDM*IQAM*TPEAQK	||||||||||||||||||||||||||||||	DGGIALSGATADFSTEDM*IQAM*TPEAQK
1	186	15	15	14	1	0.933	0.933	77	15	15	0	GAALHGPGM*SGGTR	|||||||||||||||	GAALHGPGM*SGGTR
1	187	15	15	14	1	0.933	0.933	72	15	15	0	GAAM*IPLYQVINED	|||||||||||||||	GAAM*IPLYQVINED
1	3	14	14	13	1	0.929	0.929	66	14	14	0	AAGGSNAM*QGFSR	||||||||||||||	AAGGSNAM*QGFSR
1	12	12	12	11	1	0.917	0.917	61	12	12	0	AEM*PGPLKDNK	||||||||||||	AEM*PGPLKDNK
1	30	12	12	11	1	0.917	0.917	59	12	12	0	AM*VGQDHTNLR	||||||||||||	AM*VGQDHTNLR
1	65	12	12	11	1	0.917	0.917	58	12	12	0	CTVAKLGM*GIR	||||||||||||	CTVAKLGM*GIR
1	74	12	12	11	1	0.917	0.917	52	12	12	0	DASLAM*DTVAK	||||||||||||	DASLAM*DTVAK
1	395	12	12	11	1	0.917	0.917	57	12	12	0	M*LPGNLSVGQR	||||||||||||	M*LPGNLSVGQR
1	122	11	11	10	1	0.909	0.909	52	11	11	0	DVM*EQPTVQR	|||||||||||	DVM*EQPTVQR
1	517	18	18	16	1	0.889	0.889	84	18	18	0	RM*PREAPETISM*TPLR	||||||||||||||||||	RM*PREAPETISM*TPLR
1	458	20	20	17	1	0.85	0.85	88	20	20	0	PLDGLTM*DQIISM*M*VGR	||||||||||||||||||||	PLDGLTM*DQIISM*M*VGR
1	98	13	13	11	1	0.846	0.846	56	13	13	0	DLASM*TANM*GK	|||||||||||||	DLASM*TANM*GK
0.929	3	14	13	13	0.929	0.929	1	55	13	13	1	AAGGSNAM*QGFSR	|||||||| |||||	AAGGSNAM-QGFSR
0.917	74	12	11	11	0.917	0.917	1	41	11	11	1	DASLAM*DTVAK	|||||| |||||	DASLAM-DTVAK
0.938	274	16	24	15	0.938	0.938	0.625	56	15	15	1	ILIVIAKRVIAM*VNR	|||||||||||| |||	ILIVIAKRVIAM-VNR
0.941	51	17	32	16	0.941	0.941	0.5	60	16	16	1	ATASALISTAM*TAQSR	||||||||||| |||||	ATASALISTAM-TAQSR
0.962	326	26	25	25	0.962	0.962	1	137	25	25	0	VLFAHPGGHDLDATVVYGVNHQDLR	|||||||||||||||||||||||||	VLFAHPGGHDLDATVVYGVNHQDLR
0.933	624	15	14	14	0.933	0.933	1	79	14	14	0	TTVHPDYVDNRPSR	||||||||||||||	TTVHPDYVDNRPSR
0.929	13	14	13	13	0.929	0.929	1	69	13	13	0	FAEIGGIVHTHSR	|||||||||||||	FAEIGGIVHTHSR
0.923	427	13	12	12	0.923	0.923	1	61	12	12	0	NGKLEATLHAEK	||||||||||||	NGKLEATLHAEK
0.923	510	13	12	12	0.923	0.923	1	61	12	12	0	ILYAHQLLLNGK	||||||||||||	ILYAHQLLLNGK
0.909	423	11	10	10	0.909	0.909	1	57	10	10	0	NDGPESHFSK	||||||||||	NDGPESHFSK
0.857	13	14	12	12	0.857	0.857	1	63	12	12	0	AEIGGIVHTHSR	||||||||||||	AEIGGIVHTHSR
0.857	55	14	12	12	0.857	0.857	1	67	12	12	0	IGQVHPHTAPAR	||||||||||||	IGQVHPHTAPAR
0.786	55	14	11	11	0.786	0.786	1	63	11	11	0	GQVHPHTAPAR	|||||||||||	GQVHPHTAPAR
0.714	174	21	15	15	0.714	0.714	1	73	15	15	0	FNLTMSQNLLTAIDK	|||||||||||||||	FNLTMSQNLLTAIDK
0.714	410	28	20	20	0.714	0.714	1	117	20	20	0	DCYVIQVCPSYYCVMAGIPK	||||||||||||||||||||	DCYVIQVCPSYYCVMAGIPK
0.706	298	17	12	12	0.706	0.706	1	67	12	12	0	QEPLHQVWLATK	||||||||||||	QEPLHQVWLATK
0.556	238	18	10	10	0.556	0.556	1	51	10	10	0	HIVNSIDGAK	||||||||||	HIVNSIDGAK
0.536	264	28	15	15	0.536	0.536	1	70	15	15	0	LPISEVIADNVTASR	|||||||||||||||	LPISEVIADNVTASR
0.5	686	18	9	9	0.5	0.5	1	49	9	9	0	WLEAVLPLF	|||||||||	WLEAVLPLF
0.846	393	13	12	11	0.846	0.846	0.917	58	11	11	0	ITHSPHTIASR	|||||||||||	ITHSPHTIASR
0.75	30	12	11	9	0.75	0.75	0.818	49	9	9	0	VGQDHTNLR	|||||||||	VGQDHTNLR
0.882	419	17	30	14	0.882	0.824	0.467	74	15	15	0	TTFKM*NIAYRNLGK	|||||||||||||||	TTFKM*NIAYRNLGK
0.292	691	24	19	7	0.292	0.292	0.368	37	7	7	0	LPIGHAL	|||||||	LPIGHAL
0.292	691	24	21	7	0.292	0.292	0.333	37	7	7	0	LPIGHAL	|||||||	LPIGHAL
0.292	691	24	26	7	0.292	0.292	0.269	37	7	7	0	LPIGHAL	|||||||	LPIGHAL
0.364	629	22	38	8	0.364	0.364	0.211	38	8	8	0	PAATAETL	||||||||	PAATAETL

## Sheet: YPPF_singlets_vs_YPCO_peptides
singlet_Similarity_Coverage	singlet_Number	singlet_Seq_Length	peptide_Seq_Length	Aligned_Length	singlet_Identity_Coverage	singlet_Residue_Coverage	peptide_Residue_Coverage	Score	Identity	Similarity	Gaps	singlet_Region	Alignment	peptide_Region
1	8	14	14	14	1	1	1	66	14	14	0	ANDTVLSDVLTLEK	||||||||||||||	ANDTVLSDVLTLEK
1	10	15	15	15	1	1	1	85	15	15	0	HVRPHEQVIGIFPPE	|||||||||||||||	HVRPHEQVIGIFPPE
1	15	33	33	33	1	1	1	157	33	33	0	NPPILILDEATSALDTATEQAIQLALTELSQGR	|||||||||||||||||||||||||||||||||	NPPILILDEATSALDTATEQAIQLALTELSQGR
1	16	22	22	22	1	1	1	102	22	22	0	AGIALPILNPESAILIQLSAVN	||||||||||||||||||||||	AGIALPILNPESAILIQLSAVN
1	22	10	10	10	1	1	1	60	10	10	0	YHTGINPNGK	||||||||||	YHTGINPNGK
1	23	15	15	15	1	1	1	91	15	15	0	HYNLHFNPEPGTLLH	|||||||||||||||	HYNLHFNPEPGTLLH
1	24	16	16	16	1	1	1	90	16	16	0	QGANSPTLDDTGYNPD	||||||||||||||||	QGANSPTLDDTGYNPD
1	25	18	18	18	1	1	1	84	18	18	0	MVENALLEIPSGLVEAAR	||||||||||||||||||	MVENALLEIPSGLVEAAR
1	33	19	19	19	1	1	1	94	19	19	0	LYGIRSTSNNMKTTVISNK	|||||||||||||||||||	LYGIRSTSNNMKTTVISNK
1	43	23	23	23	1	1	1	110	23	23	0	ALAQRPVLMLLDEPFSALDTALR	|||||||||||||||||||||||	ALAQRPVLMLLDEPFSALDTALR
1	56	25	25	25	1	1	1	134	25	25	0	KVVLGAEHVETSWGNSDEFNRPVQK	|||||||||||||||||||||||||	KVVLGAEHVETSWGNSDEFNRPVQK
1	58	19	19	19	1	1	1	87	19	19	0	NSAIASTIGLVEMAAQAGK	|||||||||||||||||||	NSAIASTIGLVEMAAQAGK
1	61	16	16	16	1	1	1	79	16	16	0	DGSALLTHLLDADLQR	||||||||||||||||	DGSALLTHLLDADLQR
1	64	22	22	22	1	1	1	102	22	22	0	NSSVITELLSLSCSSELSVTAP	||||||||||||||||||||||	NSSVITELLSLSCSSELSVTAP
1	69	17	17	17	1	1	1	89	17	17	0	FRCFSFLSGELGNTLSR	|||||||||||||||||	FRCFSFLSGELGNTLSR
1	77	30	30	30	1	1	1	156	30	30	0	TSVYHQALLLALVPFHNEIYQRPSPSKPAI	||||||||||||||||||||||||||||||	TSVYHQALLLALVPFHNEIYQRPSPSKPAI
1	78	16	16	16	1	1	1	82	16	16	0	AGLMLFNALVGRPEPR	||||||||||||||||	AGLMLFNALVGRPEPR
1	79	8	8	8	1	1	1	40	8	8	0	HGLQSLLR	||||||||	HGLQSLLR
1	80	8	8	8	1	1	1	42	8	8	0	IHLTPAER	||||||||	IHLTPAER
1	85	28	28	28	1	1	1	164	28	28	0	RWQALLLSDYRHWLKTRNQFSFLWAVHC	||||||||||||||||||||||||||||	RWQALLLSDYRHWLKTRNQFSFLWAVHC
1	86	20	20	20	1	1	1	103	20	20	0	RFIQNTGVFLVLLQLEWAGT	||||||||||||||||||||	RFIQNTGVFLVLLQLEWAGT
1	93	24	24	24	1	1	1	130	24	24	0	YGLPIGHALTLIQPGEHIHSQNAK	||||||||||||||||||||||||	YGLPIGHALTLIQPGEHIHSQNAK
1	97	14	14	14	1	1	1	87	14	14	0	TMAPNWWQQLGFYR	||||||||||||||	TMAPNWWQQLGFYR
1	103	32	32	32	1	1	1	170	32	32	0	DNVIPVAINNVSAGSKTQPGGYADDHPELEQF	||||||||||||||||||||||||||||||||	DNVIPVAINNVSAGSKTQPGGYADDHPELEQF
1	107	12	12	12	1	1	1	63	12	12	0	LFLSQQECNNIR	||||||||||||	LFLSQQECNNIR
1	108	12	12	12	1	1	1	57	12	12	0	LDQQLIAQGAQR	||||||||||||	LDQQLIAQGAQR
1	117	13	13	13	1	1	1	77	13	13	0	NVETSELFDIWWD	|||||||||||||	NVETSELFDIWWD
1	121	13	13	13	1	1	1	69	13	13	0	NDLGLVVACLPYA	|||||||||||||	NDLGLVVACLPYA
1	122	9	9	9	1	1	1	46	9	9	0	CSILDDVLR	|||||||||	CSILDDVLR
1	125	26	26	26	1	1	1	123	26	26	0	TPQAQLTALALQVLSTQLNDETNIIR	||||||||||||||||||||||||||	TPQAQLTALALQVLSTQLNDETNIIR
1	132	28	28	28	1	1	1	147	28	28	0	TGAAAIKRSHHGHGLHELNNRRANLLAR	||||||||||||||||||||||||||||	TGAAAIKRSHHGHGLHELNNRRANLLAR
1	136	15	15	15	1	1	1	75	15	15	0	RITAITHQSQFIQNR	|||||||||||||||	RITAITHQSQFIQNR
1	141	18	18	18	1	1	1	104	18	18	0	ETLFSTWPGPITWVIPAR	||||||||||||||||||	ETLFSTWPGPITWVIPAR
1	142	15	15	15	1	1	1	75	15	15	0	VNPSAVPLGLSYSER	|||||||||||||||	VNPSAVPLGLSYSER
1	145	25	25	25	1	1	1	121	25	25	0	RATINDIGGILELIRPLEQQGILVR	|||||||||||||||||||||||||	RATINDIGGILELIRPLEQQGILVR
1	146	16	16	16	1	1	1	77	16	16	0	VADLTVPQLILSFIPK	||||||||||||||||	VADLTVPQLILSFIPK
1	150	18	18	18	1	1	1	84	18	18	0	FSRNAAIAAAALSFGGSR	||||||||||||||||||	FSRNAAIAAAALSFGGSR
1	152	13	13	13	1	1	1	66	13	13	0	KLNISGSTVYSHK	|||||||||||||	KLNISGSTVYSHK
1	157	13	13	13	1	1	1	65	13	13	0	RHDLVPNLLSLVK	|||||||||||||	RHDLVPNLLSLVK
1	166	26	26	26	1	1	1	134	26	26	0	PQLDEHYLVITALGADRPGIVNTITR	||||||||||||||||||||||||||	PQLDEHYLVITALGADRPGIVNTITR
1	173	31	31	31	1	1	1	169	31	31	0	RFPGVLALDGVNLTLNKGEVHCLAGQNGCGK	|||||||||||||||||||||||||||||||	RFPGVLALDGVNLTLNKGEVHCLAGQNGCGK
1	174	8	8	8	1	1	1	37	8	8	0	LDIADAVK	||||||||	LDIADAVK
1	175	10	10	10	1	1	1	58	10	10	0	FGFDKPLHQR	||||||||||	FGFDKPLHQR
1	179	19	19	19	1	1	1	87	19	19	0	KFADTAVENAVSIRLSSSR	|||||||||||||||||||	KFADTAVENAVSIRLSSSR
1	184	17	17	17	1	1	1	87	17	17	0	THSTQQLSPEGVAEGKR	|||||||||||||||||	THSTQQLSPEGVAEGKR
1	187	15	15	15	1	1	1	72	15	15	0	GKGLATLLYEELVVK	|||||||||||||||	GKGLATLLYEELVVK
1	188	15	15	15	1	1	1	73	15	15	0	IGGQAINLNMTIQIK	|||||||||||||||	IGGQAINLNMTIQIK
1	192	16	16	16	1	1	1	89	16	16	0	APEQFVPHNLAGEGPK	||||||||||||||||	APEQFVPHNLAGEGPK
1	194	13	13	13	1	1	1	67	13	13	0	AQYLIAKYPDTVE	|||||||||||||	AQYLIAKYPDTVE
1	195	28	28	28	1	1	1	138	28	28	0	YHALEEPTSLNTLELLPELFAANIASVK	||||||||||||||||||||||||||||	YHALEEPTSLNTLELLPELFAANIASVK
1	198	18	18	18	1	1	1	85	18	18	0	VVTTPAYMLAGSISEAAK	||||||||||||||||||	VVTTPAYMLAGSISEAAK
1	202	18	18	18	1	1	1	82	18	18	0	VLLEAADKLTTDAEALAR	||||||||||||||||||	VLLEAADKLTTDAEALAR
1	203	30	30	30	1	1	1	139	30	30	0	SADNLSPLVVNSEMQEIVSVTSTLNQLLLR	||||||||||||||||||||||||||||||	SADNLSPLVVNSEMQEIVSVTSTLNQLLLR
1	206	13	13	13	1	1	1	69	13	13	0	GLRLTNRGTGDGR	|||||||||||||	GLRLTNRGTGDGR
1	211	11	11	11	1	1	1	60	11	11	0	SRQDYYTAGGR	|||||||||||	SRQDYYTAGGR
1	218	13	13	13	1	1	1	66	13	13	0	NGNVQAITQDDAK	|||||||||||||	NGNVQAITQDDAK
1	220	10	10	10	1	1	1	51	10	10	0	RPEHLALAQR	||||||||||	RPEHLALAQR
1	222	16	16	16	1	1	1	79	16	16	0	LAQGDGLTPSTVSGVK	||||||||||||||||	LAQGDGLTPSTVSGVK
1	225	8	8	8	1	1	1	48	8	8	0	WGIGYLQK	||||||||	WGIGYLQK
1	231	12	12	12	1	1	1	65	12	12	0	SLQHYEGHELAR	||||||||||||	SLQHYEGHELAR
1	235	18	18	18	1	1	1	93	18	18	0	YFGVSNFTPTQFSLLQSR	||||||||||||||||||	YFGVSNFTPTQFSLLQSR
1	236	18	18	18	1	1	1	89	18	18	0	QLLDQLQHELAQGEQQLR	||||||||||||||||||	QLLDQLQHELAQGEQQLR
1	237	23	23	23	1	1	1	120	23	23	0	AAWMYYVAGQTQHEIAEALGVSR	|||||||||||||||||||||||	AAWMYYVAGQTQHEIAEALGVSR
1	241	10	10	10	1	1	1	53	10	10	0	VPFIDTFDLR	||||||||||	VPFIDTFDLR
1	245	29	29	29	1	1	1	136	29	29	0	TAVNQLISALAQSIPLLDIEPLQANKLEK	|||||||||||||||||||||||||||||	TAVNQLISALAQSIPLLDIEPLQANKLEK
1	246	13	13	13	1	1	1	71	13	13	0	SHLGGAFSGYSYR	|||||||||||||	SHLGGAFSGYSYR
1	248	13	13	13	1	1	1	64	13	13	0	TQPLSPVTQVQAR	|||||||||||||	TQPLSPVTQVQAR
1	249	31	31	31	1	1	1	159	31	31	0	KPVSLTPDTDLDTDLSIDELEIEDLMNDFFK	|||||||||||||||||||||||||||||||	KPVSLTPDTDLDTDLSIDELEIEDLMNDFFK
1	250	12	12	12	1	1	1	63	12	12	0	YNMPVIPEMVAR	||||||||||||	YNMPVIPEMVAR
1	252	18	18	18	1	1	1	92	18	18	0	SQVVQSGPANNDLDNELD	||||||||||||||||||	SQVVQSGPANNDLDNELD
1	258	9	9	9	1	1	1	46	9	9	0	CSINLVGSK	|||||||||	CSINLVGSK
1	259	19	19	19	1	1	1	92	19	19	0	ANVSIPASAASETPVSTPD	|||||||||||||||||||	ANVSIPASAASETPVSTPD
1	265	19	19	19	1	1	1	100	19	19	0	TATPADFAEIWPLFQAVIR	|||||||||||||||||||	TATPADFAEIWPLFQAVIR
1	275	13	13	13	1	1	1	71	13	13	0	DMVYNLPILTPPR	|||||||||||||	DMVYNLPILTPPR
1	285	8	8	8	1	1	1	42	8	8	0	NHQLLGIR	||||||||	NHQLLGIR
1	293	11	11	11	1	1	1	58	11	11	0	FPLNKEVFVNK	|||||||||||	FPLNKEVFVNK
1	294	10	10	10	1	1	1	51	10	10	0	KLVDHLSNER	||||||||||	KLVDHLSNER
1	295	16	16	16	1	1	1	82	16	16	0	QQAVYAPLMEYIADNR	||||||||||||||||	QQAVYAPLMEYIADNR
1	302	12	12	12	1	1	1	59	12	12	0	GVGLYLIEETLR	||||||||||||	GVGLYLIEETLR
1	303	13	13	13	1	1	1	66	13	13	0	KVRRVCIAINPLK	|||||||||||||	KVRRVCIAINPLK
1	315	13	13	13	1	1	1	67	13	13	0	ILAESPYDDSLYT	|||||||||||||	ILAESPYDDSLYT
1	316	25	25	25	1	1	1	142	25	25	0	TRQHAIFCRYPPLALAFQKAWNTFF	|||||||||||||||||||||||||	TRQHAIFCRYPPLALAFQKAWNTFF
1	321	25	25	25	1	1	1	132	25	25	0	VINPETMYPSVPFGFSHAVEQLSGR	|||||||||||||||||||||||||	VINPETMYPSVPFGFSHAVEQLSGR
1	325	27	27	27	1	1	1	130	27	27	0	VNSEALQQAGALGVIILGQEVHAIFGK	|||||||||||||||||||||||||||	VNSEALQQAGALGVIILGQEVHAIFGK
1	330	8	8	8	1	1	1	40	8	8	0	LTVTQNNK	||||||||	LTVTQNNK
1	332	16	16	16	1	1	1	88	16	16	0	IQALEEILDTEHPNWR	||||||||||||||||	IQALEEILDTEHPNWR
1	334	18	18	18	1	1	1	87	18	18	0	LKTGALPGAADDIILRAK	||||||||||||||||||	LKTGALPGAADDIILRAK
1	336	33	33	33	1	1	1	177	33	33	0	DDDTGWALRPLLAVDLPFSAVMDTLFLPYDYLR	|||||||||||||||||||||||||||||||||	DDDTGWALRPLLAVDLPFSAVMDTLFLPYDYLR
1	345	14	14	14	1	1	1	71	14	14	0	ARPATEVFTELFGK	||||||||||||||	ARPATEVFTELFGK
1	351	12	12	12	1	1	1	57	12	12	0	MEQQLQNSSLKR	||||||||||||	MEQQLQNSSLKR
1	352	15	15	15	1	1	1	80	15	15	0	DGQNDSDTVSPLDFK	|||||||||||||||	DGQNDSDTVSPLDFK
1	358	13	13	13	1	1	1	68	13	13	0	IALKPYLGGKPLK	|||||||||||||	IALKPYLGGKPLK
1	362	32	32	32	1	1	1	160	32	32	0	VSNEVFILPLNAVMESLQPLAEDLHPLAGGER	||||||||||||||||||||||||||||||||	VSNEVFILPLNAVMESLQPLAEDLHPLAGGER
1	365	33	33	33	1	1	1	166	33	33	0	NLQDTILGLMPQALITTPQGSLDPNKIPASTLK	|||||||||||||||||||||||||||||||||	NLQDTILGLMPQALITTPQGSLDPNKIPASTLK
1	366	10	10	10	1	1	1	54	10	10	0	LNVAHEDDGK	||||||||||	LNVAHEDDGK
1	368	23	23	23	1	1	1	129	23	23	0	GVHHFDTIRDEIAHEIGESGPHR	|||||||||||||||||||||||	GVHHFDTIRDEIAHEIGESGPHR
1	372	16	16	16	1	1	1	74	16	16	0	IEVRQGGLLIVDIIIK	||||||||||||||||	IEVRQGGLLIVDIIIK
1	373	11	11	11	1	1	1	54	11	11	0	TDEGTSVQQIR	|||||||||||	TDEGTSVQQIR
1	374	12	12	12	1	1	1	65	12	12	0	VSSSHFYDRDGK	||||||||||||	VSSSHFYDRDGK
1	378	19	19	19	1	1	1	95	19	19	0	DGIPVLLENEARPLSIDEK	|||||||||||||||||||	DGIPVLLENEARPLSIDEK
1	379	20	20	20	1	1	1	116	20	20	0	AFALPNWWYLPVDAQLPSDR	||||||||||||||||||||	AFALPNWWYLPVDAQLPSDR
1	384	17	17	17	1	1	1	90	17	17	0	HALKGEAVPLGTYQDKK	|||||||||||||||||	HALKGEAVPLGTYQDKK
1	390	16	16	16	1	1	1	74	16	16	0	MELLPSEQVVAEAQAR	||||||||||||||||	MELLPSEQVVAEAQAR
1	391	17	17	17	1	1	1	79	17	17	0	VLDATENEMIAAVDVAK	|||||||||||||||||	VLDATENEMIAAVDVAK
1	393	15	15	15	1	1	1	70	15	15	0	MQTSPLLESLMEALR	|||||||||||||||	MQTSPLLESLMEALR
1	395	19	19	19	1	1	1	95	19	19	0	EAQAQTDGSDIQNDPLISR	|||||||||||||||||||	EAQAQTDGSDIQNDPLISR
1	397	15	15	15	1	1	1	82	15	15	0	EGLDVNSHGENAYNQ	|||||||||||||||	EGLDVNSHGENAYNQ
1	398	16	16	16	1	1	1	79	16	16	0	APGQPLEALTAAFLER	||||||||||||||||	APGQPLEALTAAFLER
1	404	18	18	18	1	1	1	91	18	18	0	GVPVTIFLGHRAYSLLVK	||||||||||||||||||	GVPVTIFLGHRAYSLLVK
1	409	16	16	16	1	1	1	87	16	16	0	DNQPLLEEVNQWLAGK	||||||||||||||||	DNQPLLEEVNQWLAGK
1	411	25	25	25	1	1	1	119	25	25	0	AAQQLLDQLSNSQPIQQIIIPGQLV	|||||||||||||||||||||||||	AAQQLLDQLSNSQPIQQIIIPGQLV
1	413	16	16	16	1	1	1	80	16	16	0	DDIDAEQSTQEPLSER	||||||||||||||||	DDIDAEQSTQEPLSER
1	418	15	15	15	1	1	1	74	15	15	0	KVEQAGLQNLTPELK	|||||||||||||||	KVEQAGLQNLTPELK
1	419	23	23	23	1	1	1	121	23	23	0	DANIDFDESVFVPTVAGYYTDSK	|||||||||||||||||||||||	DANIDFDESVFVPTVAGYYTDSK
1	424	18	18	18	1	1	1	100	18	18	0	PVHASIEPLGWESEFFQR	||||||||||||||||||	PVHASIEPLGWESEFFQR
1	426	15	15	15	1	1	1	73	15	15	0	DFIAMTGIPAVATLK	|||||||||||||||	DFIAMTGIPAVATLK
1	428	14	14	14	1	1	1	65	14	14	0	LKQVLNQAVQSFLK	||||||||||||||	LKQVLNQAVQSFLK
1	431	15	15	15	1	1	1	75	15	15	0	NIRAQLLVCSKHLLK	|||||||||||||||	NIRAQLLVCSKHLLK
1	433	17	17	17	1	1	1	85	17	17	0	LMQVLTGPSPNFSLTLR	|||||||||||||||||	LMQVLTGPSPNFSLTLR
1	439	20	20	20	1	1	1	105	20	20	0	LSFSIENLLDKEYTTVWGQR	||||||||||||||||||||	LSFSIENLLDKEYTTVWGQR
1	441	16	16	16	1	1	1	98	16	16	0	IEWEHVVPAWQFGHQR	||||||||||||||||	IEWEHVVPAWQFGHQR
1	445	13	13	13	1	1	1	66	13	13	0	VELSHKPISHALK	|||||||||||||	VELSHKPISHALK
1	446	15	15	15	1	1	1	75	15	15	0	TRILQFFGYLLNIIR	|||||||||||||||	TRILQFFGYLLNIIR
1	452	23	23	23	1	1	1	111	23	23	0	GVSLITGIDGSDEDLDKLAAELK	|||||||||||||||||||||||	GVSLITGIDGSDEDLDKLAAELK
1	462	17	17	17	1	1	1	76	17	17	0	LNGRSSSKSSSLVSLQR	|||||||||||||||||	LNGRSSSKSSSLVSLQR
1	467	22	22	22	1	1	1	110	22	22	0	AEEEPATPPAPTTEEILLAEIR	||||||||||||||||||||||	AEEEPATPPAPTTEEILLAEIR
1	469	19	19	19	1	1	1	98	19	19	0	VSKDSHSACASCGLSVNAK	|||||||||||||||||||	VSKDSHSACASCGLSVNAK
1	474	13	13	13	1	1	1	68	13	13	0	SVIHIVNGHVTGR	|||||||||||||	SVIHIVNGHVTGR
1	477	10	10	10	1	1	1	54	10	10	0	FKDLSPHLQR	||||||||||	FKDLSPHLQR
1	478	17	17	17	1	1	1	91	17	17	0	GGHTFTTNLASHNQAVR	|||||||||||||||||	GGHTFTTNLASHNQAVR
1	482	22	22	22	1	1	1	115	22	22	0	HHGLQGLLVEGGNLGLENAELR	||||||||||||||||||||||	HHGLQGLLVEGGNLGLENAELR
1	491	28	28	28	1	1	1	144	28	28	0	VQAVLEQLGLGALGNRHPHQLSGGQQQR	||||||||||||||||||||||||||||	VQAVLEQLGLGALGNRHPHQLSGGQQQR
1	496	11	11	11	1	1	1	57	11	11	0	GDHQQLINSIR	|||||||||||	GDHQQLINSIR
1	497	15	15	15	1	1	1	82	15	15	0	YVHVMAFKPNLKDPL	|||||||||||||||	YVHVMAFKPNLKDPL
1	499	9	9	9	1	1	1	37	9	9	0	LVLASIISK	|||||||||	LVLASIISK
1	501	14	14	14	1	1	1	74	14	14	0	SSGMIIASHHPAYR	||||||||||||||	SSGMIIASHHPAYR
1	502	24	24	24	1	1	1	126	24	24	0	IYLTEAWPITTYPAILLQTPLEVK	||||||||||||||||||||||||	IYLTEAWPITTYPAILLQTPLEVK
1	505	18	18	18	1	1	1	98	18	18	0	AAASLAHHYPGGYNAFIK	||||||||||||||||||	AAASLAHHYPGGYNAFIK
1	508	10	10	10	1	1	1	54	10	10	0	NHSRPLSTQG	||||||||||	NHSRPLSTQG
1	512	25	25	25	1	1	1	135	25	25	0	FHKGIEGIGFTQTRNTVNGGFSPLR	|||||||||||||||||||||||||	FHKGIEGIGFTQTRNTVNGGFSPLR
1	513	28	28	28	1	1	1	145	28	28	0	EGWMAVTADQRPGYAVTTAMNQLVANIR	||||||||||||||||||||||||||||	EGWMAVTADQRPGYAVTTAMNQLVANIR
1	514	13	13	13	1	1	1	66	13	13	0	DTQTYQVDTVTAK	|||||||||||||	DTQTYQVDTVTAK
1	515	35	35	35	1	1	1	181	35	35	0	LLSLDGPTGTLTHGIFTDLLDKLAPGDLLVFNNTR	|||||||||||||||||||||||||||||||||||	LLSLDGPTGTLTHGIFTDLLDKLAPGDLLVFNNTR
1	516	29	29	29	1	1	1	151	29	29	0	VQLGGNNTLDNTTLSGNATDGHGVEINSR	|||||||||||||||||||||||||||||	VQLGGNNTLDNTTLSGNATDGHGVEINSR
1	519	14	14	14	1	1	1	78	14	14	0	RSCDPYEPRRVRLR	||||||||||||||	RSCDPYEPRRVRLR
1	520	12	12	12	1	1	1	56	12	12	0	LVAEEVQNFSAK	||||||||||||	LVAEEVQNFSAK
1	522	15	15	15	1	1	1	75	15	15	0	VSSAPLWQLNLLEIK	|||||||||||||||	VSSAPLWQLNLLEIK
1	527	19	19	19	1	1	1	94	19	19	0	TVGSGGVYLMPEIAQQLAR	|||||||||||||||||||	TVGSGGVYLMPEIAQQLAR
1	535	14	14	14	1	1	1	73	14	14	0	LFSHASQAQYQHLR	||||||||||||||	LFSHASQAQYQHLR
1	536	13	13	13	1	1	1	64	13	13	0	TLFAVEQTPANQS	|||||||||||||	TLFAVEQTPANQS
1	539	12	12	12	1	1	1	67	12	12	0	DIAIDYWNSGIR	||||||||||||	DIAIDYWNSGIR
1	545	15	15	15	1	1	1	75	15	15	0	PPQSVLGINQAFVVR	|||||||||||||||	PPQSVLGINQAFVVR
1	552	16	16	16	1	1	1	81	16	16	0	IRDILGEDLVDLHNLK	||||||||||||||||	IRDILGEDLVDLHNLK
1	562	11	11	11	1	1	1	56	11	11	0	EAHQILRPQVR	|||||||||||	EAHQILRPQVR
1	563	26	26	26	1	1	1	132	26	26	0	LGALQQLLIIHQATSDWHNAIEVAEK	||||||||||||||||||||||||||	LGALQQLLIIHQATSDWHNAIEVAEK
1	564	24	24	24	1	1	1	113	24	24	0	RIETQLEQPVEQSTLVSTAAVNKE	||||||||||||||||||||||||	RIETQLEQPVEQSTLVSTAAVNKE
1	566	28	28	28	1	1	1	137	28	28	0	TVLAEYLGSLGATIHQAENGLAALYQLK	||||||||||||||||||||||||||||	TVLAEYLGSLGATIHQAENGLAALYQLK
1	569	11	11	11	1	1	1	60	11	11	0	HEIIHAVYPSR	|||||||||||	HEIIHAVYPSR
1	571	17	17	17	1	1	1	88	17	17	0	ASEAVLAFDPDDPYEIR	|||||||||||||||||	ASEAVLAFDPDDPYEIR
1	572	8	8	8	1	1	1	43	8	8	0	DSLGLDQH	||||||||	DSLGLDQH
1	573	14	14	14	1	1	1	71	14	14	0	NGYQDSQLSTIQER	||||||||||||||	NGYQDSQLSTIQER
1	575	18	18	18	1	1	1	94	18	18	0	NTAGTEAIYLLLHYAFDK	||||||||||||||||||	NTAGTEAIYLLLHYAFDK
1	576	15	15	15	1	1	1	77	15	15	0	YNLTPTHSEVIEAVK	|||||||||||||||	YNLTPTHSEVIEAVK
1	580	11	11	11	1	1	1	62	11	11	0	GHLYAHQGLEK	|||||||||||	GHLYAHQGLEK
1	581	30	30	30	1	1	1	152	30	30	0	YYQQTDDMFELSAALIESLIQNHAFANANK	||||||||||||||||||||||||||||||	YYQQTDDMFELSAALIESLIQNHAFANANK
1	583	16	16	16	1	1	1	86	16	16	0	GGHFLRPTVLADVDNR	||||||||||||||||	GGHFLRPTVLADVDNR
1	589	17	17	17	1	1	1	93	17	17	0	IDRHEVQQHGLTLDNPR	|||||||||||||||||	IDRHEVQQHGLTLDNPR
1	590	21	21	21	1	1	1	109	21	21	0	SGWGQLANSNVFIEFIDTALR	|||||||||||||||||||||	SGWGQLANSNVFIEFIDTALR
1	592	31	31	31	1	1	1	159	31	31	0	TIAEQHGATPAQVILSWAMQLGYGVIPSSTK	|||||||||||||||||||||||||||||||	TIAEQHGATPAQVILSWAMQLGYGVIPSSTK
1	593	25	25	25	1	1	1	129	25	25	0	TGKPVTAEGEAAADWVLNSLADLPK	|||||||||||||||||||||||||	TGKPVTAEGEAAADWVLNSLADLPK
1	594	23	23	23	1	1	1	116	23	23	0	AYVSGLSDEDFSDLAAYYASLKP	|||||||||||||||||||||||	AYVSGLSDEDFSDLAAYYASLKP
1	597	11	11	11	1	1	1	54	11	11	0	HLNRLEQVLIR	|||||||||||	HLNRLEQVLIR
1	600	7	7	7	1	1	1	39	7	7	0	GKYEGEK	|||||||	GKYEGEK
1	601	16	16	16	1	1	1	75	16	16	0	DALQAITFIDQLMAAR	||||||||||||||||	DALQAITFIDQLMAAR
1	603	11	11	11	1	1	1	58	11	11	0	HLHTAIGVKTR	|||||||||||	HLHTAIGVKTR
1	608	15	15	15	1	1	1	80	15	15	0	VLIDLPEEYLLWFAR	|||||||||||||||	VLIDLPEEYLLWFAR
1	613	19	19	19	1	1	1	101	19	19	0	RLGPGTKLGLLARLPWAKR	|||||||||||||||||||	RLGPGTKLGLLARLPWAKR
1	619	16	16	16	1	1	1	85	16	16	0	DFANTFGLQVDQQEPR	||||||||||||||||	DFANTFGLQVDQQEPR
1	620	13	13	13	1	1	1	66	13	13	0	ELEDALGFPLFIR	|||||||||||||	ELEDALGFPLFIR
1	621	20	20	20	1	1	1	102	20	20	0	SEHLSKDPLHGITLEQLLTK	||||||||||||||||||||	SEHLSKDPLHGITLEQLLTK
1	634	28	28	28	1	1	1	135	28	28	0	AVRPGATLGDIGASIQQLAEGAGFSVVR	||||||||||||||||||||||||||||	AVRPGATLGDIGASIQQLAEGAGFSVVR
1	640	15	15	15	1	1	1	83	15	15	0	SHRFDIYPSSVTPPR	|||||||||||||||	SHRFDIYPSSVTPPR
1	642	26	26	26	1	1	1	129	26	26	0	QQLINAFDNSVLYTDSFIANVIDQMR	||||||||||||||||||||||||||	QQLINAFDNSVLYTDSFIANVIDQMR
1	646	17	17	17	1	1	1	79	17	17	0	NITQLDELVQEAEALLR	|||||||||||||||||	NITQLDELVQEAEALLR
1	650	13	13	13	1	1	1	64	13	13	0	RAFSVALYHALQR	|||||||||||||	RAFSVALYHALQR
1	654	10	10	10	1	1	1	50	10	10	0	KGILGSLFGK	||||||||||	KGILGSLFGK
1	658	22	22	22	1	1	1	104	22	22	0	SASANSFANAEVILLPGINSEK	||||||||||||||||||||||	SASANSFANAEVILLPGINSEK
1	659	14	14	14	1	1	1	76	14	14	0	THGSGNPGATNVLR	||||||||||||||	THGSGNPGATNVLR
1	660	16	16	16	1	1	1	82	16	16	0	GQFTDLDNQVISNLFK	||||||||||||||||	GQFTDLDNQVISNLFK
1	661	14	14	14	1	1	1	72	14	14	0	MMGGGASQPLFTSK	||||||||||||||	MMGGGASQPLFTSK
1	663	12	12	12	1	1	1	61	12	12	0	GSQVTDSHGLVR	||||||||||||	GSQVTDSHGLVR
1	665	14	14	14	1	1	1	76	14	14	0	ITGFYRPLANGPLK	||||||||||||||	ITGFYRPLANGPLK
1	668	12	12	12	1	1	1	66	12	12	0	KLNALTMPHPDR	||||||||||||	KLNALTMPHPDR
1	672	13	13	13	1	1	1	65	13	13	0	TAVGYKPVATESK	|||||||||||||	TAVGYKPVATESK
1	675	25	25	25	1	1	1	111	25	25	0	ELDTLQSLLTTSQSSELQAAAALLK	|||||||||||||||||||||||||	ELDTLQSLLTTSQSSELQAAAALLK
1	677	17	17	17	1	1	1	81	17	17	0	ALESAIAIIHYVAGDLK	|||||||||||||||||	ALESAIAIIHYVAGDLK
1	678	15	15	15	1	1	1	81	15	15	0	THFETGNLPLFFSIK	|||||||||||||||	THFETGNLPLFFSIK
1	680	13	13	13	1	1	1	63	13	13	0	ILADAQEVYEQQK	|||||||||||||	ILADAQEVYEQQK
1	689	17	17	17	1	1	1	88	17	17	0	HKVVGDTVTLPFVEFVR	|||||||||||||||||	HKVVGDTVTLPFVEFVR
1	694	15	15	15	1	1	1	70	15	15	0	AVNGMMLDMLAAISR	|||||||||||||||	AVNGMMLDMLAAISR
1	695	11	11	11	1	1	1	53	11	11	0	MKIETISYVKK	|||||||||||	MKIETISYVKK
1	697	20	20	20	1	1	1	91	20	20	0	SKTAPLVNVSNSSLIISINA	||||||||||||||||||||	SKTAPLVNVSNSSLIISINA
1	698	12	12	12	1	1	1	62	12	12	0	NTQDYPVLIQSR	||||||||||||	NTQDYPVLIQSR
1	58	19	20	19	1	1	0.95	77	19	19	1	NSAIASTIGLVEM-AAQAGK	||||||||||||| ||||||	NSAIASTIGLVEM*AAQAGK
1	501	14	15	14	1	1	0.933	64	14	14	1	SSGM-IIASHHPAYR	|||| ||||||||||	SSGM*IIASHHPAYR
1	321	25	26	25	1	1	0.962	132	25	25	0	VINPETMYPSVPFGFSHAVEQLSGR	|||||||||||||||||||||||||	VINPETMYPSVPFGFSHAVEQLSGR
1	295	16	17	16	1	1	0.941	82	16	16	0	QQAVYAPLMEYIADNR	||||||||||||||||	QQAVYAPLMEYIADNR
1	446	15	16	15	1	1	0.938	75	15	15	0	TRILQFFGYLLNIIR	|||||||||||||||	TRILQFFGYLLNIIR
1	684	14	15	14	1	1	0.933	79	14	14	0	TTVHPDYVDNRPSR	||||||||||||||	TTVHPDYVDNRPSR
1	302	12	13	12	1	1	0.923	59	12	12	0	GVGLYLIEETLR	||||||||||||	GVGLYLIEETLR
1	371	12	13	12	1	1	0.923	61	12	12	0	NGKLEATLHAEK	||||||||||||	NGKLEATLHAEK
1	518	10	11	10	1	1	0.909	57	10	10	0	NDGPESHFSK	||||||||||	NDGPESHFSK
1	31	20	28	20	1	1	0.714	117	20	20	0	DCYVIQVCPSYYCVMAGIPK	||||||||||||||||||||	DCYVIQVCPSYYCVMAGIPK
1	405	15	21	15	1	1	0.714	73	15	15	0	FNLTMSQNLLTAIDK	|||||||||||||||	FNLTMSQNLLTAIDK
1	90	12	17	12	1	1	0.706	67	12	12	0	QEPLHQVWLATK	||||||||||||	QEPLHQVWLATK
1	676	37	37	36	1	0.973	0.973	171	37	37	0	LGEQEAFAM*TVPLLIDVDSSQQEALEAIALNDELVR	|||||||||||||||||||||||||||||||||||||	LGEQEAFAM*TVPLLIDVDSSQQEALEAIALNDELVR
1	521	33	33	32	1	0.97	0.97	159	33	33	0	DKAVFPAIAALGGM*LAPALIYLLFNGADEVTR	|||||||||||||||||||||||||||||||||	DKAVFPAIAALGGM*LAPALIYLLFNGADEVTR
1	288	23	23	22	1	0.957	0.957	128	23	23	0	MGKLM*GRWPWRIKVSWMKQSKR	|||||||||||||||||||||||	MGKLM*GRWPWRIKVSWMKQSKR
1	277	22	22	21	1	0.955	0.955	106	22	22	0	DLSAEPTSVILLGGYVVM*DPK	||||||||||||||||||||||	DLSAEPTSVILLGGYVVM*DPK
1	525	18	18	17	1	0.944	0.944	97	18	18	0	DSNIWFM*QLGHDVYQAK	||||||||||||||||||	DSNIWFM*QLGHDVYQAK
1	73	17	17	16	1	0.941	0.941	87	17	17	0	TEDVM*PEGGSPDRLDE	|||||||||||||||||	TEDVM*PEGGSPDRLDE
1	74	16	16	15	1	0.938	0.938	82	16	16	0	VTHTAM*SFYGEVKHQ	||||||||||||||||	VTHTAM*SFYGEVKHQ
1	112	15	15	14	1	0.933	0.933	77	15	15	0	GAALHGPGM*SGGTR	|||||||||||||||	GAALHGPGM*SGGTR
1	296	30	30	28	1	0.933	0.933	141	30	30	0	DGGIALSGATADFSTEDM*IQAM*TPEAQK	||||||||||||||||||||||||||||||	DGGIALSGATADFSTEDM*IQAM*TPEAQK
1	338	15	15	14	1	0.933	0.933	72	15	15	0	GAAM*IPLYQVINED	|||||||||||||||	GAAM*IPLYQVINED
1	176	14	14	13	1	0.929	0.929	68	14	14	0	AM*HANGINTNASK	||||||||||||||	AM*HANGINTNASK
1	84	12	12	11	1	0.917	0.917	58	12	12	0	CTVAKLGM*GIR	||||||||||||	CTVAKLGM*GIR
1	463	12	12	11	1	0.917	0.917	57	12	12	0	M*LPGNLSVGQR	||||||||||||	M*LPGNLSVGQR
1	643	12	12	11	1	0.917	0.917	61	12	12	0	AEM*PGPLKDNK	||||||||||||	AEM*PGPLKDNK
1	456	11	11	10	1	0.909	0.909	52	11	11	0	DVM*EQPTVQR	|||||||||||	DVM*EQPTVQR
1	98	18	18	16	1	0.889	0.889	84	18	18	0	RM*PREAPETISM*TPLR	||||||||||||||||||	RM*PREAPETISM*TPLR
1	354	13	13	11	1	0.846	0.846	56	13	13	0	DLASM*TANM*GK	|||||||||||||	DLASM*TANM*GK
0.973	676	37	36	36	0.973	0.973	1	160	36	36	1	LGEQEAFAM*TVPLLIDVDSSQQEALEAIALNDELVR	||||||||| |||||||||||||||||||||||||||	LGEQEAFAM-TVPLLIDVDSSQQEALEAIALNDELVR
0.938	557	16	15	15	0.938	0.938	1	70	15	15	1	LHLQPM*NLSVTQNHK	|||||| |||||||||	LHLQPM-NLSVTQNHK
0.5	243	32	17	16	0.5	0.5	0.941	60	16	16	1	ATASALISTAM-TAQSR	||||||||||| |||||	ATASALISTAM*TAQSR
0.882	391	17	16	15	0.882	0.882	0.938	61	15	15	1	DATENEM-IAAVDVAK	||||||| ||||||||	DATENEM*IAAVDVAK
0.625	83	24	16	15	0.625	0.625	0.938	56	15	15	1	ILIVIAKRVIAM-VNR	|||||||||||| |||	ILIVIAKRVIAM*VNR
0.96	56	25	24	24	0.96	0.96	1	129	24	24	0	VVLGAEHVETSWGNSDEFNRPVQK	||||||||||||||||||||||||	VVLGAEHVETSWGNSDEFNRPVQK
0.96	145	25	24	24	0.96	0.96	1	116	24	24	0	ATINDIGGILELIRPLEQQGILVR	||||||||||||||||||||||||	ATINDIGGILELIRPLEQQGILVR
0.957	95	23	22	22	0.957	0.957	1	116	22	22	0	ATSGEEWVGILQGPLPQESGIK	||||||||||||||||||||||	ATSGEEWVGILQGPLPQESGIK
0.929	501	14	13	13	0.929	0.929	1	70	13	13	0	SGMIIASHHPAYR	|||||||||||||	SGMIIASHHPAYR
0.8	497	15	12	12	0.8	0.8	1	65	12	12	0	YVHVMAFKPNLK	||||||||||||	YVHVMAFKPNLK
0.696	160	23	16	16	0.696	0.696	1	84	16	16	0	LPVVQVANHYLQDGKK	||||||||||||||||	LPVVQVANHYLQDGKK
0.667	306	15	10	10	0.667	0.667	1	47	10	10	0	RLEEGLVTLR	||||||||||	RLEEGLVTLR
0.629	515	35	22	22	0.629	0.629	1	114	22	22	0	LLSLDGPTGTLTHGIFTDLLDK	||||||||||||||||||||||	LLSLDGPTGTLTHGIFTDLLDK
0.786	148	14	12	11	0.786	0.786	0.917	69	11	11	0	HYDQHQDAWVM	|||||||||||	HYDQHQDAWVM
0.917	284	12	13	11	0.917	0.917	0.846	58	11	11	0	ITHSPHTIASR	|||||||||||	ITHSPHTIASR
0.5	76	30	17	14	0.5	0.467	0.824	74	15	15	0	TTFKM*NIAYRNLGK	|||||||||||||||	TTFKM*NIAYRNLGK
0.786	176	14	16	11	0.786	0.786	0.688	58	11	11	0	HANGINTNASK	|||||||||||	HANGINTNASK
0.292	93	24	21	7	0.292	0.292	0.333	37	7	7	0	LPIGHAL	|||||||	LPIGHAL
0.292	93	24	26	7	0.292	0.292	0.269	37	7	7	0	LPIGHAL	|||||||	LPIGHAL

## Sheet: YPCO_singlets_vs_YSTB_peptides
singlet_Similarity_Coverage	singlet_Number	singlet_Seq_Length	peptide_Seq_Length	Aligned_Length	singlet_Identity_Coverage	singlet_Residue_Coverage	peptide_Residue_Coverage	Score	Identity	Similarity	Gaps		singlet_Region	Alignment	peptide_Region
1	4	17	17	17	1	1	1	81	17	17	0		AAIVTFDPLAKDIVIKQ	|||||||||||||||||	AAIVTFDPLAKDIVIKQ
1	8	18	18	18	1	1	1	87	18	18	0		AATQNTPAATGQVQSLTR	||||||||||||||||||	AATQNTPAATGQVQSLTR
1	9	23	23	23	1	1	1	120	23	23	0		AAWMYYVAGQTQHEIAEALGVSR	|||||||||||||||||||||||	AAWMYYVAGQTQHEIAEALGVSR
1	11	15	15	15	1	1	1	76	15	15	0		ADNPFDALLPSAMAK	|||||||||||||||	ADNPFDALLPSAMAK
1	13	14	14	14	1	1	1	73	14	14	0		AFAEIGGIVHTHSR	||||||||||||||	AFAEIGGIVHTHSR
1	14	20	20	20	1	1	1	116	20	20	0		AFALPNWWYLPVDAQLPSDR	||||||||||||||||||||	AFALPNWWYLPVDAQLPSDR
1	15	8	8	8	1	1	1	41	8	8	0		AGAERKYR	||||||||	AGAERKYR
1	17	22	22	22	1	1	1	102	22	22	0		AGIALPILNPESAILIQLSAVN	||||||||||||||||||||||	AGIALPILNPESAILIQLSAVN
1	21	23	23	23	1	1	1	122	23	23	0		AHPNIPALLNPVFATLDGPTLQK	|||||||||||||||||||||||	AHPNIPALLNPVFATLDGPTLQK
1	22	34	34	34	1	1	1	160	34	34	0		AIAIEPEVLLLDEPTSALDPISTLTIEELITTLK	||||||||||||||||||||||||||||||||||	AIAIEPEVLLLDEPTSALDPISTLTIEELITTLK
1	33	14	14	14	1	1	1	74	14	14	0		AMPFIDGTEVDYVR	||||||||||||||	AMPFIDGTEVDYVR
1	35	19	19	19	1	1	1	92	19	19	0		ANVSIPASAASETPVSTPD	|||||||||||||||||||	ANVSIPASAASETPVSTPD
1	39	15	15	15	1	1	1	77	15	15	0		APLEVSQASGALNWR	|||||||||||||||	APLEVSQASGALNWR
1	44	13	13	13	1	1	1	67	13	13	0		AQYLIAKYPDTVE	|||||||||||||	AQYLIAKYPDTVE
1	55	14	14	14	1	1	1	75	14	14	0		AVIGQVHPHTAPAR	||||||||||||||	AVIGQVHPHTAPAR
1	57	23	23	23	1	1	1	116	23	23	0		AYVSGLSDEDFSDLAAYYASLKP	|||||||||||||||||||||||	AYVSGLSDEDFSDLAAYYASLKP
1	71	16	16	16	1	1	1	73	16	16	0		DAIALNGSAEASQLSR	||||||||||||||||	DAIALNGSAEASQLSR
1	78	16	16	16	1	1	1	80	16	16	0		DDIDAEQSTQEPLSER	||||||||||||||||	DDIDAEQSTQEPLSER
1	80	10	10	10	1	1	1	49	10	10	0		DEIVDGLTAR	||||||||||	DEIVDGLTAR
1	81	15	15	15	1	1	1	73	15	15	0		DFIAMTGIPAVATLK	|||||||||||||||	DFIAMTGIPAVATLK
1	90	15	15	15	1	1	1	80	15	15	0		DGQNDSDTVSPLDFK	|||||||||||||||	DGQNDSDTVSPLDFK
1	91	16	16	16	1	1	1	79	16	16	0		DGSALLTHLLDADLQR	||||||||||||||||	DGSALLTHLLDADLQR
1	93	14	14	14	1	1	1	66	14	14	0		DIAEQLVAQAVGGK	||||||||||||||	DIAEQLVAQAVGGK
1	99	14	14	14	1	1	1	71	14	14	0		DLDLPIDGFIESSR	||||||||||||||	DLDLPIDGFIESSR
1	101	11	11	11	1	1	1	61	11	11	0		DLLNMSDADWR	|||||||||||	DLLNMSDADWR
1	105	18	18	18	1	1	1	97	18	18	0		DNGTARDNGTAGNNGTAR	||||||||||||||||||	DNGTARDNGTAGNNGTAR
1	118	14	14	14	1	1	1	73	14	14	0		DTFAVTADSPGQFR	||||||||||||||	DTFAVTADSPGQFR
1	123	31	31	31	1	1	1	155	31	31	0		DVMSLAETLAEAAAMGNDLGDYTVLSHYQQR	|||||||||||||||||||||||||||||||	DVMSLAETLAEAAAMGNDLGDYTVLSHYQQR
1	129	11	11	11	1	1	1	56	11	11	0		EAHQILRPQVR	|||||||||||	EAHQILRPQVR
1	130	35	35	35	1	1	1	175	35	35	0		EALYQDVAHHVLDGTQTPSLVVEQILQMLTGEMVK	|||||||||||||||||||||||||||||||||||	EALYQDVAHHVLDGTQTPSLVVEQILQMLTGEMVK
1	132	31	31	31	1	1	1	154	31	31	0		EELTNEASDLMYHLLVLLQDQDLDFSTVIGR	|||||||||||||||||||||||||||||||	EELTNEASDLMYHLLVLLQDQDLDFSTVIGR
1	134	15	15	15	1	1	1	82	15	15	0		EGLDVNSHGENAYNQ	|||||||||||||||	EGLDVNSHGENAYNQ
1	136	28	28	28	1	1	1	145	28	28	0		EGWMAVTADQRPGYAVTTAMNQLVANIR	||||||||||||||||||||||||||||	EGWMAVTADQRPGYAVTTAMNQLVANIR
1	140	29	29	29	1	1	1	137	29	29	0		EIQQQYGEQQASLAVEAAFAGLANELLAR	|||||||||||||||||||||||||||||	EIQQQYGEQQASLAVEAAFAGLANELLAR
1	142	15	15	15	1	1	1	82	15	15	0		EIVLFGDNVPWLLGR	|||||||||||||||	EIVLFGDNVPWLLGR
1	146	20	20	20	1	1	1	108	20	20	0		ELQVLWQPEIGEGETDGVNR	||||||||||||||||||||	ELQVLWQPEIGEGETDGVNR
1	152	18	18	18	1	1	1	104	18	18	0		ETLFSTWPGPITWVIPAR	||||||||||||||||||	ETLFSTWPGPITWVIPAR
1	154	20	20	20	1	1	1	100	20	20	0		EVLPLHQLDVVITPLVAFDR	||||||||||||||||||||	EVLPLHQLDVVITPLVAFDR
1	159	27	27	27	1	1	1	143	27	27	0		FDEDDELGLISVVAGLCEHLEFCDSAK	|||||||||||||||||||||||||||	FDEDDELGLISVVAGLCEHLEFCDSAK
1	162	25	25	25	1	1	1	135	25	25	0		FHKGIEGIGFTQTRNTVNGGFSPLR	|||||||||||||||||||||||||	FHKGIEGIGFTQTRNTVNGGFSPLR
1	163	35	35	35	1	1	1	178	35	35	0		FHTSWAELPASLQFALEPILSAENFPAMLTAEQVK	|||||||||||||||||||||||||||||||||||	FHTSWAELPASLQFALEPILSAENFPAMLTAEQVK
1	167	19	19	19	1	1	1	106	19	19	0		FKDHTSESLNTRPNVVWDK	|||||||||||||||||||	FKDHTSESLNTRPNVVWDK
1	175	23	23	23	1	1	1	116	23	23	0		FNVLGLPTILFFDSQGNEITAAR	|||||||||||||||||||||||	FNVLGLPTILFFDSQGNEITAAR
1	178	17	17	17	1	1	1	89	17	17	0		FRCFSFLSGELGNTLSR	|||||||||||||||||	FRCFSFLSGELGNTLSR
1	180	27	27	27	1	1	1	142	27	27	0		FSITNYVHPPLALADTTLQALFYPEQR	|||||||||||||||||||||||||||	FSITNYVHPPLALADTTLQALFYPEQR
1	182	11	11	11	1	1	1	55	11	11	0		FSSVEQEQQYR	|||||||||||	FSSVEQEQQYR
1	194	20	20	20	1	1	1	104	20	20	0		GGFFGALMDFVQTETESQGK	||||||||||||||||||||	GGFFGALMDFVQTETESQGK
1	195	19	19	19	1	1	1	94	19	19	0		GGGSLAPENTLAAIDVGAR	|||||||||||||||||||	GGGSLAPENTLAAIDVGAR
1	196	16	16	16	1	1	1	86	16	16	0		GGHFLRPTVLADVDNR	||||||||||||||||	GGHFLRPTVLADVDNR
1	197	11	11	11	1	1	1	62	11	11	0		GHLYAHQGLEK	|||||||||||	GHLYAHQGLEK
1	199	17	17	17	1	1	1	88	17	17	0		GIHAQNQPAQQAQAGQR	|||||||||||||||||	GIHAQNQPAQQAQAGQR
1	200	15	15	15	1	1	1	72	15	15	0		GKGLATLLYEELVVK	|||||||||||||||	GKGLATLLYEELVVK
1	203	11	11	11	1	1	1	55	11	11	0		GLGHLALGLAK	|||||||||||	GLGHLALGLAK
1	207	13	13	13	1	1	1	69	13	13	0		GLRLTNRGTGDGR	|||||||||||||	GLRLTNRGTGDGR
1	215	16	16	16	1	1	1	82	16	16	0		GQFTDLDNQVISNLFK	||||||||||||||||	GQFTDLDNQVISNLFK
1	217	12	12	12	1	1	1	58	12	12	0		GQQLATLADAGK	||||||||||||	GQQLATLADAGK
1	223	15	15	15	1	1	1	78	15	15	0		GTLDWQVSPSQLLAK	|||||||||||||||	GTLDWQVSPSQLLAK
1	229	11	11	11	1	1	1	56	11	11	0		HALGLHTAISR	|||||||||||	HALGLHTAISR
1	233	29	29	29	1	1	1	155	29	29	0		HGGVSVSPYDSLNLGTHVGDVATHVDANR	|||||||||||||||||||||||||||||	HGGVSVSPYDSLNLGTHVGDVATHVDANR
1	234	8	8	8	1	1	1	40	8	8	0		HGLQSLLR	||||||||	HGLQSLLR
1	238	18	18	18	1	1	1	93	18	18	0		HIVNSIDGAKEHEIDLQK	||||||||||||||||||	HIVNSIDGAKEHEIDLQK
1	250	11	11	11	1	1	1	60	11	11	0		HSHIVNMFEQR	|||||||||||	HSHIVNMFEQR
1	251	25	25	25	1	1	1	132	25	25	0		HSSTPEGTPDDSAVPSAFEKPSAGR	|||||||||||||||||||||||||	HSSTPEGTPDDSAVPSAFEKPSAGR
1	253	15	15	15	1	1	1	85	15	15	0		HVRPHEQVIGIFPPE	|||||||||||||||	HVRPHEQVIGIFPPE
1	259	13	13	13	1	1	1	68	13	13	0		IALKPYLGGKPLK	|||||||||||||	IALKPYLGGKPLK
1	263	17	17	17	1	1	1	93	17	17	0		IDRHEVQQHGLTLDNPR	|||||||||||||||||	IDRHEVQQHGLTLDNPR
1	264	28	28	28	1	1	1	132	28	28	0		IDSLITPQQLAEKLPISEVIADNVTASR	||||||||||||||||||||||||||||	IDSLITPQQLAEKLPISEVIADNVTASR
1	265	24	24	24	1	1	1	130	24	24	0		IENHYFTHLGFLDSDNQLLDNVTR	||||||||||||||||||||||||	IENHYFTHLGFLDSDNQLLDNVTR
1	276	22	22	22	1	1	1	104	22	22	0		ILLSNDDGISAPGIQTLASALR	||||||||||||||||||||||	ILLSNDDGISAPGIQTLASALR
1	282	16	16	16	1	1	1	88	16	16	0		IQALEEILDTEHPNWR	||||||||||||||||	IQALEEILDTEHPNWR
1	285	23	23	23	1	1	1	127	23	23	0		IRPNQQGLSLPDGFYLYQHLNGR	|||||||||||||||||||||||	IRPNQQGLSLPDGFYLYQHLNGR
1	291	15	15	15	1	1	1	68	15	15	0		ISSSISLMFFISANR	|||||||||||||||	ISSSISLMFFISANR
1	292	19	19	19	1	1	1	96	19	19	0		ISWEEAFETIAGSMQNIIK	|||||||||||||||||||	ISWEEAFETIAGSMQNIIK
1	293	14	14	14	1	1	1	76	14	14	0		ITGFYRPLANGPLK	||||||||||||||	ITGFYRPLANGPLK
1	296	18	18	18	1	1	1	96	18	18	0		ITPLLDAPDADELINWLR	||||||||||||||||||	ITPLLDAPDADELINWLR
1	310	22	22	22	1	1	1	110	22	22	0		KGSQIVTETVGHYLSAQLSGDK	||||||||||||||||||||||	KGSQIVTETVGHYLSAQLSGDK
1	314	15	15	15	1	1	1	80	15	15	0		KLEHVASWQGINVER	|||||||||||||||	KLEHVASWQGINVER
1	316	14	14	14	1	1	1	68	14	14	0		KLSLTHAGEATLER	||||||||||||||	KLSLTHAGEATLER
1	317	10	10	10	1	1	1	51	10	10	0		KLVDHLSNER	||||||||||	KLVDHLSNER
1	321	31	31	31	1	1	1	159	31	31	0		KPVSLTPDTDLDTDLSIDELEIEDLMNDFFK	|||||||||||||||||||||||||||||||	KPVSLTPDTDLDTDLSIDELEIEDLMNDFFK
1	322	14	14	14	1	1	1	72	14	14	0		KQLETDRELLEKDH	||||||||||||||	KQLETDRELLEKDH
1	323	19	19	19	1	1	1	98	19	19	0		KRKQLRIEFFRYFFDELIR	|||||||||||||||||||	KRKQLRIEFFRYFFDELIR
1	326	26	26	26	1	1	1	142	26	26	0		KVLFAHPGGHDLDATVVYGVNHQDLR	||||||||||||||||||||||||||	KVLFAHPGGHDLDATVVYGVNHQDLR
1	327	13	13	13	1	1	1	66	13	13	0		KVRRVCIAINPLK	|||||||||||||	KVRRVCIAINPLK
1	334	16	16	16	1	1	1	79	16	16	0		LAQGDGLTPSTVSGVK	||||||||||||||||	LAQGDGLTPSTVSGVK
1	339	12	12	12	1	1	1	57	12	12	0		LDQQLIAQGAQR	||||||||||||	LDQQLIAQGAQR
1	343	11	11	11	1	1	1	51	11	11	0		LFLNSLLELFL	|||||||||||	LFLNSLLELFL
1	348	16	16	16	1	1	1	82	16	16	0		LHQHALPSMDFVVLVK	||||||||||||||||	LHQHALPSMDFVVLVK
1	353	35	35	35	1	1	1	175	35	35	0		LISAMDFMPTALEAAEIDAPNNLDGVSLLPYLTGK	|||||||||||||||||||||||||||||||||||	LISAMDFMPTALEAAEIDAPNNLDGVSLLPYLTGK
1	357	14	14	14	1	1	1	65	14	14	0		LKQVLNQAVQSFLK	||||||||||||||	LKQVLNQAVQSFLK
1	360	16	16	16	1	1	1	76	16	16	0		LLENLSAPLFALLPAK	||||||||||||||||	LLENLSAPLFALLPAK
1	361	15	15	15	1	1	1	71	15	15	0		LLHDLDLLEALLIEK	|||||||||||||||	LLHDLDLLEALLIEK
1	364	17	17	17	1	1	1	93	17	17	0		LLTEPYPPTPFETFSIR	|||||||||||||||||	LLTEPYPPTPFETFSIR
1	374	20	20	20	1	1	1	93	20	20	0		LSALMDGETLDSELLGILSK	||||||||||||||||||||	LSALMDGETLDSELLGILSK
1	379	23	23	23	1	1	1	110	23	23	0		LTEIISAPVEALGYELVGIEFIR	|||||||||||||||||||||||	LTEIISAPVEALGYELVGIEFIR
1	385	9	9	9	1	1	1	37	9	9	0		LVLASIISK	|||||||||	LVLASIISK
1	389	19	19	19	1	1	1	102	19	19	0		LYIEEVEGGIYPAEEHTFQ	|||||||||||||||||||	LYIEEVEGGIYPAEEHTFQ
1	404	12	12	12	1	1	1	57	12	12	0		MEQQLQNSSLKR	||||||||||||	MEQQLQNSSLKR
1	405	32	32	32	1	1	1	154	32	32	0		MFDLSSIVDNEQTSDALEDVVMGLIINAGQAR	||||||||||||||||||||||||||||||||	MFDLSSIVDNEQTSDALEDVVMGLIINAGQAR
1	407	19	19	19	1	1	1	95	19	19	0		MHGLEEIIELQDLLADLPR	|||||||||||||||||||	MHGLEEIIELQDLLADLPR
1	413	24	24	24	1	1	1	120	24	24	0		MLDLADNLSEWLSQAPLSLEEEQR	||||||||||||||||||||||||	MLDLADNLSEWLSQAPLSLEEEQR
1	414	18	18	18	1	1	1	83	18	18	0		MMALIKIGASGAISGAKR	||||||||||||||||||	MMALIKIGASGAISGAKR
1	416	11	11	11	1	1	1	58	11	11	0		MPGLGLFNTLK	|||||||||||	MPGLGLFNTLK
1	420	18	18	18	1	1	1	84	18	18	0		MVENALLEIPSGLVEAAR	||||||||||||||||||	MVENALLEIPSGLVEAAR
1	424	13	13	13	1	1	1	69	13	13	0		NDLGLVVACLPYA	|||||||||||||	NDLGLVVACLPYA
1	429	13	13	13	1	1	1	66	13	13	0		NGNVQAITQDDAK	|||||||||||||	NGNVQAITQDDAK
1	433	10	10	10	1	1	1	49	10	10	0		NIDVDKIEAK	||||||||||	NIDVDKIEAK
1	434	15	15	15	1	1	1	78	15	15	0		NIENPLLLLGTFTPR	|||||||||||||||	NIENPLLLLGTFTPR
1	436	15	15	15	1	1	1	75	15	15	0		NIRAQLLVCSKHLLK	|||||||||||||||	NIRAQLLVCSKHLLK
1	438	17	17	17	1	1	1	79	17	17	0		NITQLDELVQEAEALLR	|||||||||||||||||	NITQLDELVQEAEALLR
1	439	16	16	16	1	1	1	78	16	16	0		NKAQGKASTELAANNK	||||||||||||||||	NKAQGKASTELAANNK
1	449	12	12	12	1	1	1	65	12	12	0		NSLPGYLSYSPR	||||||||||||	NSLPGYLSYSPR
1	450	22	22	22	1	1	1	102	22	22	0		NSSVITELLSLSCSSELSVTAP	||||||||||||||||||||||	NSSVITELLSLSCSSELSVTAP
1	454	13	13	13	1	1	1	77	13	13	0		NVETSELFDIWWD	|||||||||||||	NVETSELFDIWWD
1	463	11	11	11	1	1	1	56	11	11	0		QEIIDFKINNK	|||||||||||	QEIIDFKINNK
1	465	16	16	16	1	1	1	90	16	16	0		QGANSPTLDDTGYNPD	||||||||||||||||	QGANSPTLDDTGYNPD
1	468	22	22	22	1	1	1	112	22	22	0		QIRPLTPLELEGLLYSAGNYVR	||||||||||||||||||||||	QIRPLTPLELEGLLYSAGNYVR
1	471	18	18	18	1	1	1	89	18	18	0		QLLDQLQHELAQGEQQLR	||||||||||||||||||	QLLDQLQHELAQGEQQLR
1	474	22	22	22	1	1	1	117	22	22	0		QLSPFLLLDYAGPMDFTPTTQR	||||||||||||||||||||||	QLSPFLLLDYAGPMDFTPTTQR
1	482	26	26	26	1	1	1	129	26	26	0		QQLINAFDNSVLYTDSFIANVIDQMR	||||||||||||||||||||||||||	QQLINAFDNSVLYTDSFIANVIDQMR
1	502	31	31	31	1	1	1	169	31	31	0		RFPGVLALDGVNLTLNKGEVHCLAGQNGCGK	|||||||||||||||||||||||||||||||	RFPGVLALDGVNLTLNKGEVHCLAGQNGCGK
1	508	24	24	24	1	1	1	113	24	24	0		RIETQLEQPVEQSTLVSTAAVNKE	||||||||||||||||||||||||	RIETQLEQPVEQSTLVSTAAVNKE
1	513	10	10	10	1	1	1	47	10	10	0		RLEEGLVTLR	||||||||||	RLEEGLVTLR
1	522	26	26	26	1	1	1	130	26	26	0		RQGLSLSGGDPLHPQNLSAILQLVQR	||||||||||||||||||||||||||	RQGLSLSGGDPLHPQNLSAILQLVQR
1	535	21	21	21	1	1	1	114	21	21	0		RVEPWNVTLVDTGEDSMTGGR	|||||||||||||||||||||	RVEPWNVTLVDTGEDSMTGGR
1	552	20	20	20	1	1	1	102	20	20	0		SEHLSKDPLHGITLEQLLTK	||||||||||||||||||||	SEHLSKDPLHGITLEQLLTK
1	557	18	18	18	1	1	1	103	18	18	0		SGGRYPHAVPAPQFCLAG	||||||||||||||||||	SGGRYPHAVPAPQFCLAG
1	573	8	8	8	1	1	1	41	8	8	0		SPAHILEK	||||||||	SPAHILEK
1	577	18	18	18	1	1	1	92	18	18	0		SQVVQSGPANNDLDNELD	||||||||||||||||||	SQVVQSGPANNDLDNELD
1	579	11	11	11	1	1	1	60	11	11	0		SRQDYYTAGGR	|||||||||||	SRQDYYTAGGR
1	580	17	17	17	1	1	1	82	17	17	0		SSAKLLDQLHAVILLCR	|||||||||||||||||	SSAKLLDQLHAVILLCR
1	599	19	19	19	1	1	1	100	19	19	0		TATPADFAEIWPLFQAVIR	|||||||||||||||||||	TATPADFAEIWPLFQAVIR
1	600	29	29	29	1	1	1	136	29	29	0		TAVNQLISALAQSIPLLDIEPLQANKLEK	|||||||||||||||||||||||||||||	TAVNQLISALAQSIPLLDIEPLQANKLEK
1	601	11	11	11	1	1	1	54	11	11	0		TDEGTSVQQIR	|||||||||||	TDEGTSVQQIR
1	607	25	25	25	1	1	1	129	25	25	0		TGKPVTAEGEAAADWVLNSLADLPK	|||||||||||||||||||||||||	TGKPVTAEGEAAADWVLNSLADLPK
1	609	15	15	15	1	1	1	80	15	15	0		THGLTESNLDKYDAR	|||||||||||||||	THGLTESNLDKYDAR
1	610	14	14	14	1	1	1	76	14	14	0		THGSGNPGATNVLR	||||||||||||||	THGSGNPGATNVLR
1	612	22	22	22	1	1	1	112	22	22	0		TIAETLNVTHTTVSNVFNRPEK	||||||||||||||||||||||	TIAETLNVTHTTVSNVFNRPEK
1	619	25	25	25	1	1	1	142	25	25	0		TRQHAIFCRYPPLALAFQKAWNTFF	|||||||||||||||||||||||||	TRQHAIFCRYPPLALAFQKAWNTFF
1	627	19	19	19	1	1	1	94	19	19	0		TVGSGGVYLMPEIAQQLAR	|||||||||||||||||||	TVGSGGVYLMPEIAQQLAR
1	631	16	16	16	1	1	1	79	16	16	0		TVVANDDVASAPPSER	||||||||||||||||	TVVANDDVASAPPSER
1	636	15	15	15	1	1	1	72	15	15	0		VAILDGIPVVPILER	|||||||||||||||	VAILDGIPVVPILER
1	639	10	10	10	1	1	1	54	10	10	0		VDSHPHVILR	||||||||||	VDSHPHVILR
1	640	13	13	13	1	1	1	66	13	13	0		VELSHKPISHALK	|||||||||||||	VELSHKPISHALK
1	643	36	36	36	1	1	1	176	36	36	0		VGEAGAQLLSSLIAPNDVLGVSWGQTVLALSHAITR	||||||||||||||||||||||||||||||||||||	VGEAGAQLLSSLIAPNDVLGVSWGQTVLALSHAITR
1	653	15	15	15	1	1	1	80	15	15	0		VLIDLPEEYLLWFAR	|||||||||||||||	VLIDLPEEYLLWFAR
1	654	19	19	19	1	1	1	86	19	19	0		VLLVGSGALPTTALVLVAK	|||||||||||||||||||	VLLVGSGALPTTALVLVAK
1	658	13	13	13	1	1	1	61	13	13	0		VMGKTIVIVGGVA	|||||||||||||	VMGKTIVIVGGVA
1	662	27	27	27	1	1	1	130	27	27	0		VNSEALQQAGALGVIILGQEVHAIFGK	|||||||||||||||||||||||||||	VNSEALQQAGALGVIILGQEVHAIFGK
1	671	22	22	22	1	1	1	106	22	22	0		VSGLSGSKGEVASAITSWVEVR	||||||||||||||||||||||	VSGLSGSKGEVASAITSWVEVR
1	674	15	15	15	1	1	1	75	15	15	0		VSSAPLWQLNLLEIK	|||||||||||||||	VSSAPLWQLNLLEIK
1	676	27	27	27	1	1	1	132	27	27	0		VTASANSPGCKKKASPSGRLISSLITR	|||||||||||||||||||||||||||	VTASANSPGCKKKASPSGRLISSLITR
1	684	8	8	8	1	1	1	48	8	8	0		WGIGYLQK	||||||||	WGIGYLQK
1	686	18	18	18	1	1	1	92	18	18	0		WLEAVLPLFQPVSEVTIR	||||||||||||||||||	WLEAVLPLFQPVSEVTIR
1	694	24	24	24	1	1	1	128	24	24	0		YHLLPHLSAAHNVEVPAVYAGLGK	||||||||||||||||||||||||	YHLLPHLSAAHNVEVPAVYAGLGK
1	695	10	10	10	1	1	1	60	10	10	0		YHTGINPNGK	||||||||||	YHTGINPNGK
1	701	15	15	15	1	1	1	68	15	15	0		YQVSSLAELQALLFA	|||||||||||||||	YQVSSLAELQALLFA
1	703	23	23	23	1	1	1	116	23	23	0		YSTTDNTTSGTVSVGNAATGETR	|||||||||||||||||||||||	YSTTDNTTSGTVSVGNAATGETR
1	535	21	22	21	1	1	0.955	104	21	21	1		RVEPWNVTLVDTGEDSM-TGGR	||||||||||||||||| ||||	RVEPWNVTLVDTGEDSM*TGGR
1	54	22	23	22	1	1	0.957	116	22	22	0		ATSGEEWVGILQGPLPQESGIK	||||||||||||||||||||||	ATSGEEWVGILQGPLPQESGIK
1	364	17	18	17	1	1	0.944	93	17	17	0		LLTEPYPPTPFETFSIR	|||||||||||||||||	LLTEPYPPTPFETFSIR
1	310	22	24	22	1	1	0.917	110	22	22	0		KGSQIVTETVGHYLSAQLSGDK	||||||||||||||||||||||	KGSQIVTETVGHYLSAQLSGDK
1	476	15	26	15	1	1	0.577	76	15	15	0		QNTLSISAGPKTHSR	|||||||||||||||	QNTLSISAGPKTHSR
1	93	14	25	14	1	1	0.56	66	14	14	0		DIAEQLVAQAVGGK	||||||||||||||	DIAEQLVAQAVGGK
1	248	7	15	7	1	1	0.467	37	7	7	0		HQGQLIK	|||||||	HQGQLIK
1	122	11	11	10	1	0.909	0.909	52	11	11	0		DVM*EQPTVQR	|||||||||||	DVM*EQPTVQR
1	65	12	12	11	1	0.917	0.917	58	12	12	0		CTVAKLGM*GIR	||||||||||||	CTVAKLGM*GIR
1	74	12	12	11	1	0.917	0.917	52	12	12	0		DASLAM*DTVAK	||||||||||||	DASLAM*DTVAK
1	459	12	12	11	1	0.917	0.917	61	12	12	0		PNGGQQVGKM*R	||||||||||||	PNGGQQVGKM*R
1	393	13	13	12	1	0.923	0.923	64	13	13	0		M*ITHSPHTIASR	|||||||||||||	M*ITHSPHTIASR
1	685	13	13	12	1	0.923	0.923	70	13	13	0		WGMPLEM*PVKLF	|||||||||||||	WGMPLEM*PVKLF
1	115	18	18	17	1	0.944	0.944	97	18	18	0		DSNIWFM*QLGHDVYQAK	||||||||||||||||||	DSNIWFM*QLGHDVYQAK
1	398	19	19	18	1	0.947	0.947	95	19	19	0		M*RLRHYRVMNAAVMHGAR	|||||||||||||||||||	M*RLRHYRVMNAAVMHGAR
1	102	22	22	21	1	0.955	0.955	106	22	22	0		DLSAEPTSVILLGGYVVM*DPK	||||||||||||||||||||||	DLSAEPTSVILLGGYVVM*DPK
1	109	22	22	21	1	0.955	0.955	113	22	22	0		DPAIM*PFGSAFPDPSLLLQPR	||||||||||||||||||||||	DPAIM*PFGSAFPDPSLLLQPR
1	406	23	23	22	1	0.957	0.957	128	23	23	0		MGKLM*GRWPWRIKVSWMKQSKR	|||||||||||||||||||||||	MGKLM*GRWPWRIKVSWMKQSKR
1	97	33	33	32	1	0.97	0.97	159	33	33	0		DKAVFPAIAALGGM*LAPALIYLLFNGADEVTR	|||||||||||||||||||||||||||||||||	DKAVFPAIAALGGM*LAPALIYLLFNGADEVTR
0.917	74	12	11	11	0.917	0.917	1	41	11	11	1		DASLAM*DTVAK	|||||| |||||	DASLAM-DTVAK
0.923	685	13	25	12	0.923	0.923	0.48	59	12	12	1		WGMPLEM*PVKLF	||||||| |||||	WGMPLEM-PVKLF
0.929	13	14	13	13	0.929	0.929	1	69	13	13	0		FAEIGGIVHTHSR	|||||||||||||	FAEIGGIVHTHSR
0.9	513	10	9	9	0.9	0.9	1	42	9	9	0		LEEGLVTLR	|||||||||	LEEGLVTLR
0.867	396	15	14	13	0.867	0.867	0.929	71	13	13	0		NEKHPGPLVVSGK	|||||||||||||	NEKHPGPLVVSGK
0.947	407	19	20	18	0.947	0.947	0.9	90	18	18	0		HGLEEIIELQDLLADLPR	||||||||||||||||||	HGLEEIIELQDLLADLPR
0.944	541	18	21	17	0.944	0.944	0.81	98	17	17	0		YVNPCVNGVSAGSWPLK	|||||||||||||||||	YVNPCVNGVSAGSWPLK
0.938	127	16	22	15	0.938	0.938	0.682	77	15	15	0		YDGPTQALVDGSAAK	|||||||||||||||	YDGPTQALVDGSAAK
0.625	23	16	25	10	0.625	0.625	0.4	48	10	10	0		ILASVLTMCR	||||||||||	ILASVLTMCR
0.292	691	24	26	7	0.292	0.292	0.269	37	7	7	0		LPIGHAL	|||||||	LPIGHAL
																	CountOfClean Sequence

## Sheet: YPPF_singlets_vs_YSTB_peptides
singlet_Similarity_Coverage	singlet_Number	singlet_Seq_Length	peptide_Seq_Length	Aligned_Length	singlet_Identity_Coverage	singlet_Residue_Coverage	peptide_Residue_Coverage	Score	Identity	Similarity	Gaps	singlet_Region	Alignment	peptide_Region
1	6	22	22	22	1	1	1	107	22	22	0	IVTTLSGDFSSESDTVDPTVIK	||||||||||||||||||||||	IVTTLSGDFSSESDTVDPTVIK
1	8	14	14	14	1	1	1	66	14	14	0	ANDTVLSDVLTLEK	||||||||||||||	ANDTVLSDVLTLEK
1	10	15	15	15	1	1	1	85	15	15	0	HVRPHEQVIGIFPPE	|||||||||||||||	HVRPHEQVIGIFPPE
1	14	16	16	16	1	1	1	86	16	16	0	FIATLGAVGLCDCAGR	||||||||||||||||	FIATLGAVGLCDCAGR
1	15	33	33	33	1	1	1	157	33	33	0	NPPILILDEATSALDTATEQAIQLALTELSQGR	|||||||||||||||||||||||||||||||||	NPPILILDEATSALDTATEQAIQLALTELSQGR
1	16	22	22	22	1	1	1	102	22	22	0	AGIALPILNPESAILIQLSAVN	||||||||||||||||||||||	AGIALPILNPESAILIQLSAVN
1	22	10	10	10	1	1	1	60	10	10	0	YHTGINPNGK	||||||||||	YHTGINPNGK
1	24	16	16	16	1	1	1	90	16	16	0	QGANSPTLDDTGYNPD	||||||||||||||||	QGANSPTLDDTGYNPD
1	25	18	18	18	1	1	1	84	18	18	0	MVENALLEIPSGLVEAAR	||||||||||||||||||	MVENALLEIPSGLVEAAR
1	39	22	22	22	1	1	1	100	22	22	0	VRSVVYTRLAQSASEVLSAGQR	||||||||||||||||||||||	VRSVVYTRLAQSASEVLSAGQR
1	40	10	10	10	1	1	1	57	10	10	0	RVNAGPAWQR	||||||||||	RVNAGPAWQR
1	42	17	17	17	1	1	1	96	17	17	0	GDLNHAWQLLGIQHSGK	|||||||||||||||||	GDLNHAWQLLGIQHSGK
1	58	19	19	19	1	1	1	87	19	19	0	NSAIASTIGLVEMAAQAGK	|||||||||||||||||||	NSAIASTIGLVEMAAQAGK
1	61	16	16	16	1	1	1	79	16	16	0	DGSALLTHLLDADLQR	||||||||||||||||	DGSALLTHLLDADLQR
1	64	22	22	22	1	1	1	102	22	22	0	NSSVITELLSLSCSSELSVTAP	||||||||||||||||||||||	NSSVITELLSLSCSSELSVTAP
1	69	17	17	17	1	1	1	89	17	17	0	FRCFSFLSGELGNTLSR	|||||||||||||||||	FRCFSFLSGELGNTLSR
1	70	16	16	16	1	1	1	76	16	16	0	VKEDVAAQEANNSTLK	||||||||||||||||	VKEDVAAQEANNSTLK
1	71	16	16	16	1	1	1	73	16	16	0	FLVLIAAVIDDSDVLT	||||||||||||||||	FLVLIAAVIDDSDVLT
1	75	30	30	30	1	1	1	155	30	30	0	MRENRPQLLDVLFDDAVAAENGPLHNVQQR	||||||||||||||||||||||||||||||	MRENRPQLLDVLFDDAVAAENGPLHNVQQR
1	77	30	30	30	1	1	1	156	30	30	0	TSVYHQALLLALVPFHNEIYQRPSPSKPAI	||||||||||||||||||||||||||||||	TSVYHQALLLALVPFHNEIYQRPSPSKPAI
1	79	8	8	8	1	1	1	40	8	8	0	HGLQSLLR	||||||||	HGLQSLLR
1	82	10	10	10	1	1	1	49	10	10	0	NTVNTAIQQR	||||||||||	NTVNTAIQQR
1	95	23	23	23	1	1	1	121	23	23	0	ATSGEEWVGILQGPLPQESGIKR	|||||||||||||||||||||||	ATSGEEWVGILQGPLPQESGIKR
1	97	14	14	14	1	1	1	87	14	14	0	TMAPNWWQQLGFYR	||||||||||||||	TMAPNWWQQLGFYR
1	108	12	12	12	1	1	1	57	12	12	0	LDQQLIAQGAQR	||||||||||||	LDQQLIAQGAQR
1	117	13	13	13	1	1	1	77	13	13	0	NVETSELFDIWWD	|||||||||||||	NVETSELFDIWWD
1	121	13	13	13	1	1	1	69	13	13	0	NDLGLVVACLPYA	|||||||||||||	NDLGLVVACLPYA
1	125	26	26	26	1	1	1	123	26	26	0	TPQAQLTALALQVLSTQLNDETNIIR	||||||||||||||||||||||||||	TPQAQLTALALQVLSTQLNDETNIIR
1	126	16	16	16	1	1	1	84	16	16	0	AAEASTHYLLQNGHTR	||||||||||||||||	AAEASTHYLLQNGHTR
1	127	12	12	12	1	1	1	61	12	12	0	IISNGVPESGFK	||||||||||||	IISNGVPESGFK
1	131	17	17	17	1	1	1	84	17	17	0	LNFYASLPEALAALQNN	|||||||||||||||||	LNFYASLPEALAALQNN
1	141	18	18	18	1	1	1	104	18	18	0	ETLFSTWPGPITWVIPAR	||||||||||||||||||	ETLFSTWPGPITWVIPAR
1	145	25	25	25	1	1	1	121	25	25	0	RATINDIGGILELIRPLEQQGILVR	|||||||||||||||||||||||||	RATINDIGGILELIRPLEQQGILVR
1	151	12	12	12	1	1	1	55	12	12	0	QLINILEAGIAK	||||||||||||	QLINILEAGIAK
1	159	25	25	25	1	1	1	129	25	25	0	NMLRLFVNASDHESNTQIDALVGCK	|||||||||||||||||||||||||	NMLRLFVNASDHESNTQIDALVGCK
1	166	26	26	26	1	1	1	134	26	26	0	PQLDEHYLVITALGADRPGIVNTITR	||||||||||||||||||||||||||	PQLDEHYLVITALGADRPGIVNTITR
1	173	31	31	31	1	1	1	169	31	31	0	RFPGVLALDGVNLTLNKGEVHCLAGQNGCGK	|||||||||||||||||||||||||||||||	RFPGVLALDGVNLTLNKGEVHCLAGQNGCGK
1	175	10	10	10	1	1	1	58	10	10	0	FGFDKPLHQR	||||||||||	FGFDKPLHQR
1	177	19	19	19	1	1	1	87	19	19	0	ANYNLSSAVIDSILLLIER	|||||||||||||||||||	ANYNLSSAVIDSILLLIER
1	183	13	13	13	1	1	1	67	13	13	0	SGHASVLAHPQLR	|||||||||||||	SGHASVLAHPQLR
1	184	17	17	17	1	1	1	87	17	17	0	THSTQQLSPEGVAEGKR	|||||||||||||||||	THSTQQLSPEGVAEGKR
1	187	15	15	15	1	1	1	72	15	15	0	GKGLATLLYEELVVK	|||||||||||||||	GKGLATLLYEELVVK
1	194	13	13	13	1	1	1	67	13	13	0	AQYLIAKYPDTVE	|||||||||||||	AQYLIAKYPDTVE
1	195	28	28	28	1	1	1	138	28	28	0	YHALEEPTSLNTLELLPELFAANIASVK	||||||||||||||||||||||||||||	YHALEEPTSLNTLELLPELFAANIASVK
1	198	18	18	18	1	1	1	85	18	18	0	VVTTPAYMLAGSISEAAK	||||||||||||||||||	VVTTPAYMLAGSISEAAK
1	202	18	18	18	1	1	1	82	18	18	0	VLLEAADKLTTDAEALAR	||||||||||||||||||	VLLEAADKLTTDAEALAR
1	206	13	13	13	1	1	1	69	13	13	0	GLRLTNRGTGDGR	|||||||||||||	GLRLTNRGTGDGR
1	207	13	13	13	1	1	1	68	13	13	0	HSGVNLPGLFALR	|||||||||||||	HSGVNLPGLFALR
1	210	22	22	22	1	1	1	119	22	22	0	AGCKTRNTSGRSFSHCAISSPR	||||||||||||||||||||||	AGCKTRNTSGRSFSHCAISSPR
1	211	11	11	11	1	1	1	60	11	11	0	SRQDYYTAGGR	|||||||||||	SRQDYYTAGGR
1	218	13	13	13	1	1	1	66	13	13	0	NGNVQAITQDDAK	|||||||||||||	NGNVQAITQDDAK
1	222	16	16	16	1	1	1	79	16	16	0	LAQGDGLTPSTVSGVK	||||||||||||||||	LAQGDGLTPSTVSGVK
1	225	8	8	8	1	1	1	48	8	8	0	WGIGYLQK	||||||||	WGIGYLQK
1	234	12	12	12	1	1	1	65	12	12	0	LVQPGPVYSENN	||||||||||||	LVQPGPVYSENN
1	235	18	18	18	1	1	1	93	18	18	0	YFGVSNFTPTQFSLLQSR	||||||||||||||||||	YFGVSNFTPTQFSLLQSR
1	236	18	18	18	1	1	1	89	18	18	0	QLLDQLQHELAQGEQQLR	||||||||||||||||||	QLLDQLQHELAQGEQQLR
1	237	23	23	23	1	1	1	120	23	23	0	AAWMYYVAGQTQHEIAEALGVSR	|||||||||||||||||||||||	AAWMYYVAGQTQHEIAEALGVSR
1	245	29	29	29	1	1	1	136	29	29	0	TAVNQLISALAQSIPLLDIEPLQANKLEK	|||||||||||||||||||||||||||||	TAVNQLISALAQSIPLLDIEPLQANKLEK
1	247	21	21	21	1	1	1	125	21	21	0	SWSTEISPWCEPSSTAVGNWR	|||||||||||||||||||||	SWSTEISPWCEPSSTAVGNWR
1	249	31	31	31	1	1	1	159	31	31	0	KPVSLTPDTDLDTDLSIDELEIEDLMNDFFK	|||||||||||||||||||||||||||||||	KPVSLTPDTDLDTDLSIDELEIEDLMNDFFK
1	250	12	12	12	1	1	1	63	12	12	0	YNMPVIPEMVAR	||||||||||||	YNMPVIPEMVAR
1	252	18	18	18	1	1	1	92	18	18	0	SQVVQSGPANNDLDNELD	||||||||||||||||||	SQVVQSGPANNDLDNELD
1	259	19	19	19	1	1	1	92	19	19	0	ANVSIPASAASETPVSTPD	|||||||||||||||||||	ANVSIPASAASETPVSTPD
1	265	19	19	19	1	1	1	100	19	19	0	TATPADFAEIWPLFQAVIR	|||||||||||||||||||	TATPADFAEIWPLFQAVIR
1	270	15	15	15	1	1	1	74	15	15	0	IITALSGVVCLSGYR	|||||||||||||||	IITALSGVVCLSGYR
1	274	30	30	30	1	1	1	147	30	30	0	VLDGGVTPLNLAAGGAGAGLPDSAAAALTR	||||||||||||||||||||||||||||||	VLDGGVTPLNLAAGGAGAGLPDSAAAALTR
1	294	10	10	10	1	1	1	51	10	10	0	KLVDHLSNER	||||||||||	KLVDHLSNER
1	295	16	16	16	1	1	1	82	16	16	0	QQAVYAPLMEYIADNR	||||||||||||||||	QQAVYAPLMEYIADNR
1	302	12	12	12	1	1	1	59	12	12	0	GVGLYLIEETLR	||||||||||||	GVGLYLIEETLR
1	303	13	13	13	1	1	1	66	13	13	0	KVRRVCIAINPLK	|||||||||||||	KVRRVCIAINPLK
1	308	14	14	14	1	1	1	75	14	14	0	MNDSIYQEIEDNPR	||||||||||||||	MNDSIYQEIEDNPR
1	316	25	25	25	1	1	1	142	25	25	0	TRQHAIFCRYPPLALAFQKAWNTFF	|||||||||||||||||||||||||	TRQHAIFCRYPPLALAFQKAWNTFF
1	319	14	14	14	1	1	1	68	14	14	0	SKSNLDTEQGLLER	||||||||||||||	SKSNLDTEQGLLER
1	325	27	27	27	1	1	1	130	27	27	0	VNSEALQQAGALGVIILGQEVHAIFGK	|||||||||||||||||||||||||||	VNSEALQQAGALGVIILGQEVHAIFGK
1	332	16	16	16	1	1	1	88	16	16	0	IQALEEILDTEHPNWR	||||||||||||||||	IQALEEILDTEHPNWR
1	339	12	12	12	1	1	1	63	12	12	0	KLNKPVGYVEQR	||||||||||||	KLNKPVGYVEQR
1	340	12	12	12	1	1	1	69	12	12	0	YQHYTPSDETRR	||||||||||||	YQHYTPSDETRR
1	341	19	19	19	1	1	1	92	19	19	0	TDVGGSATFAVVRGGIIIK	|||||||||||||||||||	TDVGGSATFAVVRGGIIIK
1	349	28	28	28	1	1	1	148	28	28	0	SGTMTYTGLNAQTRPDPQIGLNSQAGPK	||||||||||||||||||||||||||||	SGTMTYTGLNAQTRPDPQIGLNSQAGPK
1	351	12	12	12	1	1	1	57	12	12	0	MEQQLQNSSLKR	||||||||||||	MEQQLQNSSLKR
1	352	15	15	15	1	1	1	80	15	15	0	DGQNDSDTVSPLDFK	|||||||||||||||	DGQNDSDTVSPLDFK
1	358	13	13	13	1	1	1	68	13	13	0	IALKPYLGGKPLK	|||||||||||||	IALKPYLGGKPLK
1	361	30	30	30	1	1	1	142	30	30	0	ATAANSTALGANSVADRENSVSVGSVGNER	||||||||||||||||||||||||||||||	ATAANSTALGANSVADRENSVSVGSVGNER
1	369	16	16	16	1	1	1	81	16	16	0	LMFASDLHGSLPATER	||||||||||||||||	LMFASDLHGSLPATER
1	373	11	11	11	1	1	1	54	11	11	0	TDEGTSVQQIR	|||||||||||	TDEGTSVQQIR
1	379	20	20	20	1	1	1	116	20	20	0	AFALPNWWYLPVDAQLPSDR	||||||||||||||||||||	AFALPNWWYLPVDAQLPSDR
1	380	26	26	26	1	1	1	136	26	26	0	ANDLLFIGNNDEEEAPLTATSYPIIH	||||||||||||||||||||||||||	ANDLLFIGNNDEEEAPLTATSYPIIH
1	385	24	24	24	1	1	1	126	24	24	0	VLIEPLNNDNMPGYFISSFPLAEK	||||||||||||||||||||||||	VLIEPLNNDNMPGYFISSFPLAEK
1	389	13	13	13	1	1	1	63	13	13	0	FPSTVNAAETVAK	|||||||||||||	FPSTVNAAETVAK
1	392	27	27	27	1	1	1	140	27	27	0	LTDASIVDITSVYPHSIDNNEMIPYEK	|||||||||||||||||||||||||||	LTDASIVDITSVYPHSIDNNEMIPYEK
1	393	15	15	15	1	1	1	70	15	15	0	MQTSPLLESLMEALR	|||||||||||||||	MQTSPLLESLMEALR
1	395	19	19	19	1	1	1	95	19	19	0	EAQAQTDGSDIQNDPLISR	|||||||||||||||||||	EAQAQTDGSDIQNDPLISR
1	397	15	15	15	1	1	1	82	15	15	0	EGLDVNSHGENAYNQ	|||||||||||||||	EGLDVNSHGENAYNQ
1	399	23	23	23	1	1	1	120	23	23	0	TPLTVLQGYLEMMHDQELAGPLR	|||||||||||||||||||||||	TPLTVLQGYLEMMHDQELAGPLR
1	401	11	11	11	1	1	1	55	11	11	0	MNNVLGVVIPK	|||||||||||	MNNVLGVVIPK
1	403	22	22	22	1	1	1	120	22	22	0	RIPSDTELSDSDEWSEEDPLKH	||||||||||||||||||||||	RIPSDTELSDSDEWSEEDPLKH
1	411	25	25	25	1	1	1	119	25	25	0	AAQQLLDQLSNSQPIQQIIIPGQLV	|||||||||||||||||||||||||	AAQQLLDQLSNSQPIQQIIIPGQLV
1	413	16	16	16	1	1	1	80	16	16	0	DDIDAEQSTQEPLSER	||||||||||||||||	DDIDAEQSTQEPLSER
1	418	15	15	15	1	1	1	74	15	15	0	KVEQAGLQNLTPELK	|||||||||||||||	KVEQAGLQNLTPELK
1	426	15	15	15	1	1	1	73	15	15	0	DFIAMTGIPAVATLK	|||||||||||||||	DFIAMTGIPAVATLK
1	428	14	14	14	1	1	1	65	14	14	0	LKQVLNQAVQSFLK	||||||||||||||	LKQVLNQAVQSFLK
1	431	15	15	15	1	1	1	75	15	15	0	NIRAQLLVCSKHLLK	|||||||||||||||	NIRAQLLVCSKHLLK
1	434	15	15	15	1	1	1	80	15	15	0	VSLVNDGPVTFWLQV	|||||||||||||||	VSLVNDGPVTFWLQV
1	438	9	9	9	1	1	1	53	9	9	0	KLYTYGQCR	|||||||||	KLYTYGQCR
1	445	13	13	13	1	1	1	66	13	13	0	VELSHKPISHALK	|||||||||||||	VELSHKPISHALK
1	450	16	16	16	1	1	1	81	16	16	0	EVGTALYDEFFTLLTR	||||||||||||||||	EVGTALYDEFFTLLTR
1	459	13	13	13	1	1	1	71	13	13	0	MNYQHWLSLAAAR	|||||||||||||	MNYQHWLSLAAAR
1	470	17	17	17	1	1	1	89	17	17	0	YVPQGDVPDVVQESFIK	|||||||||||||||||	YVPQGDVPDVVQESFIK
1	472	26	26	26	1	1	1	152	26	26	0	RYGQHSWQFPQGGINPGETPEQAMYR	||||||||||||||||||||||||||	RYGQHSWQFPQGGINPGETPEQAMYR
1	478	17	17	17	1	1	1	91	17	17	0	GGHTFTTNLASHNQAVR	|||||||||||||||||	GGHTFTTNLASHNQAVR
1	479	10	10	10	1	1	1	57	10	10	0	YMTLHRPAPK	||||||||||	YMTLHRPAPK
1	482	22	22	22	1	1	1	115	22	22	0	HHGLQGLLVEGGNLGLENAELR	||||||||||||||||||||||	HHGLQGLLVEGGNLGLENAELR
1	484	12	12	12	1	1	1	67	12	12	0	SYLDKTHQFYEK	||||||||||||	SYLDKTHQFYEK
1	495	12	12	12	1	1	1	56	12	12	0	TGAAGSLVDILR	||||||||||||	TGAAGSLVDILR
1	499	9	9	9	1	1	1	37	9	9	0	LVLASIISK	|||||||||	LVLASIISK
1	502	24	24	24	1	1	1	126	24	24	0	IYLTEAWPITTYPAILLQTPLEVK	||||||||||||||||||||||||	IYLTEAWPITTYPAILLQTPLEVK
1	505	18	18	18	1	1	1	98	18	18	0	AAASLAHHYPGGYNAFIK	||||||||||||||||||	AAASLAHHYPGGYNAFIK
1	511	18	18	18	1	1	1	94	18	18	0	LVDPTDDSNTTSVQFYER	||||||||||||||||||	LVDPTDDSNTTSVQFYER
1	512	25	25	25	1	1	1	135	25	25	0	FHKGIEGIGFTQTRNTVNGGFSPLR	|||||||||||||||||||||||||	FHKGIEGIGFTQTRNTVNGGFSPLR
1	513	28	28	28	1	1	1	145	28	28	0	EGWMAVTADQRPGYAVTTAMNQLVANIR	||||||||||||||||||||||||||||	EGWMAVTADQRPGYAVTTAMNQLVANIR
1	520	12	12	12	1	1	1	56	12	12	0	LVAEEVQNFSAK	||||||||||||	LVAEEVQNFSAK
1	522	15	15	15	1	1	1	75	15	15	0	VSSAPLWQLNLLEIK	|||||||||||||||	VSSAPLWQLNLLEIK
1	524	20	20	20	1	1	1	99	20	20	0	IDGVFAINDPTAIGADLAAK	||||||||||||||||||||	IDGVFAINDPTAIGADLAAK
1	527	19	19	19	1	1	1	94	19	19	0	TVGSGGVYLMPEIAQQLAR	|||||||||||||||||||	TVGSGGVYLMPEIAQQLAR
1	530	27	27	27	1	1	1	128	27	27	0	LLLLDEPSLGLAPIIILQIFDTIQQLR	|||||||||||||||||||||||||||	LLLLDEPSLGLAPIIILQIFDTIQQLR
1	532	11	11	11	1	1	1	57	11	11	0	LANPDPLAAGK	|||||||||||	LANPDPLAAGK
1	540	25	25	25	1	1	1	121	25	25	0	ISVGIEDSEDLIADLDHAFQLAVTR	|||||||||||||||||||||||||	ISVGIEDSEDLIADLDHAFQLAVTR
1	544	11	11	11	1	1	1	59	11	11	0	DPVTSGYSGQR	|||||||||||	DPVTSGYSGQR
1	562	11	11	11	1	1	1	56	11	11	0	EAHQILRPQVR	|||||||||||	EAHQILRPQVR
1	564	24	24	24	1	1	1	113	24	24	0	RIETQLEQPVEQSTLVSTAAVNKE	||||||||||||||||||||||||	RIETQLEQPVEQSTLVSTAAVNKE
1	572	8	8	8	1	1	1	43	8	8	0	DSLGLDQH	||||||||	DSLGLDQH
1	580	11	11	11	1	1	1	62	11	11	0	GHLYAHQGLEK	|||||||||||	GHLYAHQGLEK
1	583	16	16	16	1	1	1	86	16	16	0	GGHFLRPTVLADVDNR	||||||||||||||||	GGHFLRPTVLADVDNR
1	586	11	11	11	1	1	1	52	11	11	0	FQQEGISVIAQ	|||||||||||	FQQEGISVIAQ
1	589	17	17	17	1	1	1	93	17	17	0	IDRHEVQQHGLTLDNPR	|||||||||||||||||	IDRHEVQQHGLTLDNPR
1	593	25	25	25	1	1	1	129	25	25	0	TGKPVTAEGEAAADWVLNSLADLPK	|||||||||||||||||||||||||	TGKPVTAEGEAAADWVLNSLADLPK
1	594	23	23	23	1	1	1	116	23	23	0	AYVSGLSDEDFSDLAAYYASLKP	|||||||||||||||||||||||	AYVSGLSDEDFSDLAAYYASLKP
1	595	22	22	22	1	1	1	111	22	22	0	RQFILSGSITPETVDIYHASRR	||||||||||||||||||||||	RQFILSGSITPETVDIYHASRR
1	608	15	15	15	1	1	1	80	15	15	0	VLIDLPEEYLLWFAR	|||||||||||||||	VLIDLPEEYLLWFAR
1	615	15	15	15	1	1	1	70	15	15	0	LFTPALVDSALSQLK	|||||||||||||||	LFTPALVDSALSQLK
1	620	13	13	13	1	1	1	66	13	13	0	ELEDALGFPLFIR	|||||||||||||	ELEDALGFPLFIR
1	621	20	20	20	1	1	1	102	20	20	0	SEHLSKDPLHGITLEQLLTK	||||||||||||||||||||	SEHLSKDPLHGITLEQLLTK
1	626	8	8	8	1	1	1	40	8	8	0	TAPVIEDR	||||||||	TAPVIEDR
1	634	28	28	28	1	1	1	135	28	28	0	AVRPGATLGDIGASIQQLAEGAGFSVVR	||||||||||||||||||||||||||||	AVRPGATLGDIGASIQQLAEGAGFSVVR
1	635	29	29	29	1	1	1	140	29	29	0	QIEVEATGVDEIQALAAVIELFNSGFDED	|||||||||||||||||||||||||||||	QIEVEATGVDEIQALAAVIELFNSGFDED
1	640	15	15	15	1	1	1	83	15	15	0	SHRFDIYPSSVTPPR	|||||||||||||||	SHRFDIYPSSVTPPR
1	642	26	26	26	1	1	1	129	26	26	0	QQLINAFDNSVLYTDSFIANVIDQMR	||||||||||||||||||||||||||	QQLINAFDNSVLYTDSFIANVIDQMR
1	644	15	15	15	1	1	1	82	15	15	0	TSSKHGFGDYDKIKK	|||||||||||||||	TSSKHGFGDYDKIKK
1	646	17	17	17	1	1	1	79	17	17	0	NITQLDELVQEAEALLR	|||||||||||||||||	NITQLDELVQEAEALLR
1	656	17	17	17	1	1	1	83	17	17	0	QQLTADKIDTQPIEAIK	|||||||||||||||||	QQLTADKIDTQPIEAIK
1	659	14	14	14	1	1	1	76	14	14	0	THGSGNPGATNVLR	||||||||||||||	THGSGNPGATNVLR
1	660	16	16	16	1	1	1	82	16	16	0	GQFTDLDNQVISNLFK	||||||||||||||||	GQFTDLDNQVISNLFK
1	661	14	14	14	1	1	1	72	14	14	0	MMGGGASQPLFTSK	||||||||||||||	MMGGGASQPLFTSK
1	663	12	12	12	1	1	1	61	12	12	0	GSQVTDSHGLVR	||||||||||||	GSQVTDSHGLVR
1	665	14	14	14	1	1	1	76	14	14	0	ITGFYRPLANGPLK	||||||||||||||	ITGFYRPLANGPLK
1	668	12	12	12	1	1	1	66	12	12	0	KLNALTMPHPDR	||||||||||||	KLNALTMPHPDR
1	672	13	13	13	1	1	1	65	13	13	0	TAVGYKPVATESK	|||||||||||||	TAVGYKPVATESK
1	198	18	19	18	1	1	0.947	75	18	18	1	VVTTPAYM-LAGSISEAAK	|||||||| ||||||||||	VVTTPAYM*LAGSISEAAK
1	389	13	24	13	1	1	0.542	63	13	13	0	FPSTVNAAETVAK	|||||||||||||	FPSTVNAAETVAK
1	521	33	33	32	1	0.97	0.97	159	33	33	0	DKAVFPAIAALGGM*LAPALIYLLFNGADEVTR	|||||||||||||||||||||||||||||||||	DKAVFPAIAALGGM*LAPALIYLLFNGADEVTR
1	288	23	23	22	1	0.957	0.957	128	23	23	0	MGKLM*GRWPWRIKVSWMKQSKR	|||||||||||||||||||||||	MGKLM*GRWPWRIKVSWMKQSKR
1	277	22	22	21	1	0.955	0.955	106	22	22	0	DLSAEPTSVILLGGYVVM*DPK	||||||||||||||||||||||	DLSAEPTSVILLGGYVVM*DPK
1	525	18	18	17	1	0.944	0.944	97	18	18	0	DSNIWFM*QLGHDVYQAK	||||||||||||||||||	DSNIWFM*QLGHDVYQAK
1	176	14	17	13	1	0.929	0.765	68	14	14	0	AM*HANGINTNASK	||||||||||||||	AM*HANGINTNASK
1	147	13	13	12	1	0.923	0.923	60	13	13	0	SGGASGM*LGTAR	|||||||||||||	SGGASGM*LGTAR
1	84	12	12	11	1	0.917	0.917	58	12	12	0	CTVAKLGM*GIR	||||||||||||	CTVAKLGM*GIR
1	541	12	12	11	1	0.917	0.917	57	12	12	0	KIIIDNM*LFYR	||||||||||||	KIIIDNM*LFYR
1	87	11	11	10	1	0.909	0.909	48	11	11	0	M*RSITAIAYK	|||||||||||	M*RSITAIAYK
1	456	11	11	10	1	0.909	0.909	52	11	11	0	DVM*EQPTVQR	|||||||||||	DVM*EQPTVQR
0.938	647	16	15	15	0.938	0.938	1	68	15	15	1	HSFATHM*LESSGDLR	||||||| ||||||||	HSFATHM-LESSGDLR
0.923	147	13	12	12	0.923	0.923	1	49	12	12	1	SGGASGM*LGTAR	||||||| |||||	SGGASGM-LGTAR
0.708	83	24	18	17	0.708	0.708	0.944	64	17	17	1	LGM-LIAIVKILIVIAKR	||| ||||||||||||||	LGM*LIAIVKILIVIAKR
0.96	145	25	24	24	0.96	0.96	1	116	24	24	0	ATINDIGGILELIRPLEQQGILVR	||||||||||||||||||||||||	ATINDIGGILELIRPLEQQGILVR
0.955	403	22	21	21	0.955	0.955	1	115	21	21	0	IPSDTELSDSDEWSEEDPLKH	|||||||||||||||||||||	IPSDTELSDSDEWSEEDPLKH
0.667	306	15	10	10	0.667	0.667	1	47	10	10	0	RLEEGLVTLR	||||||||||	RLEEGLVTLR
0.6	306	15	9	9	0.6	0.6	1	42	9	9	0	LEEGLVTLR	|||||||||	LEEGLVTLR
0.567	361	30	17	17	0.567	0.567	1	79	17	17	0	ATAANSTALGANSVADR	|||||||||||||||||	ATAANSTALGANSVADR
0.433	361	30	13	13	0.433	0.433	1	63	13	13	0	ENSVSVGSVGNER	|||||||||||||	ENSVSVGSVGNER
0.917	284	12	13	11	0.917	0.917	0.846	58	11	11	0	ITHSPHTIASR	|||||||||||	ITHSPHTIASR
0.583	63	12	10	7	0.583	0.583	0.7	36	7	7	0	KNDLNIK	|||||||	KNDLNIK
0.615	54	13	24	8	0.615	0.615	0.333	38	8	8	0	SPLLLELN	||||||||	SPLLLELN
0.292	93	24	26	7	0.292	0.292	0.269	37	7	7	0	LPIGHAL	|||||||	LPIGHAL
0.3	53	20	25	6	0.3	0.3	0.24	38	6	6	0	AGWVEH	||||||	AGWVEH

## Sheet: YSTB_singlets_vs_YPCO_peptides
singlet_Similarity_Coverage	singlet_Number	singlet_Seq_Length	peptide_Seq_Length	Aligned_Length	singlet_Identity_Coverage	singlet_Residue_Coverage	peptide_Residue_Coverage	Score	Identity	Similarity	Gaps	singlet_Region	Alignment	peptide_Region
1	3	11	11	11	1	1	1	56	11	11	0	QEIIDFKINNK	|||||||||||	QEIIDFKINNK
1	4	14	14	14	1	1	1	73	14	14	0	YPLHVADLASAHAR	||||||||||||||	YPLHVADLASAHAR
1	7	24	24	24	1	1	1	120	24	24	0	DFPELNSVTYSLEDVELEAQEGIK	||||||||||||||||||||||||	DFPELNSVTYSLEDVELEAQEGIK
1	9	15	15	15	1	1	1	78	15	15	0	ASGIQTGGPNTLNQR	|||||||||||||||	ASGIQTGGPNTLNQR
1	11	15	15	15	1	1	1	75	15	15	0	NIRAQLLVCSKHLLK	|||||||||||||||	NIRAQLLVCSKHLLK
1	17	10	10	10	1	1	1	60	10	10	0	YHTGINPNGK	||||||||||	YHTGINPNGK
1	18	16	16	16	1	1	1	94	16	16	0	HHFPDIPVYGPQETAK	||||||||||||||||	HHFPDIPVYGPQETAK
1	21	14	14	14	1	1	1	76	14	14	0	ITGFYRPLANGPLK	||||||||||||||	ITGFYRPLANGPLK
1	31	18	18	18	1	1	1	103	18	18	0	SGGRYPHAVPAPQFCLAG	||||||||||||||||||	SGGRYPHAVPAPQFCLAG
1	32	21	21	21	1	1	1	101	21	21	0	DQPAELSADVVVANILAGPLR	|||||||||||||||||||||	DQPAELSADVVVANILAGPLR
1	39	21	21	21	1	1	1	110	21	21	0	FGFIFDELGFTPAATFAESGR	|||||||||||||||||||||	FGFIFDELGFTPAATFAESGR
1	43	16	16	16	1	1	1	76	16	16	0	LLENLSAPLFALLPAK	||||||||||||||||	LLENLSAPLFALLPAK
1	45	13	13	13	1	1	1	61	13	13	0	LLLEHLIEQLEAR	|||||||||||||	LLLEHLIEQLEAR
1	47	12	12	12	1	1	1	62	12	12	0	AIEMYGAPIYVR	||||||||||||	AIEMYGAPIYVR
1	49	11	11	11	1	1	1	60	11	11	0	HSHIVNMFEQR	|||||||||||	HSHIVNMFEQR
1	51	16	16	16	1	1	1	79	16	16	0	TVVANDDVASAPPSER	||||||||||||||||	TVVANDDVASAPPSER
1	53	29	29	29	1	1	1	155	29	29	0	HGGVSVSPYDSLNLGTHVGDVATHVDANR	|||||||||||||||||||||||||||||	HGGVSVSPYDSLNLGTHVGDVATHVDANR
1	60	14	14	14	1	1	1	78	14	14	0	GFHIDVFQHVNNAR	||||||||||||||	GFHIDVFQHVNNAR
1	75	9	9	9	1	1	1	37	9	9	0	LVLASIISK	|||||||||	LVLASIISK
1	78	20	20	20	1	1	1	116	20	20	0	AFALPNWWYLPVDAQLPSDR	||||||||||||||||||||	AFALPNWWYLPVDAQLPSDR
1	82	16	16	16	1	1	1	86	16	16	0	GGHFLRPTVLADVDNR	||||||||||||||||	GGHFLRPTVLADVDNR
1	83	8	8	8	1	1	1	38	8	8	0	DFITALLK	||||||||	DFITALLK
1	84	24	24	24	1	1	1	117	24	24	0	LIFSDSAPPLNPAELAAFTLVQAK	||||||||||||||||||||||||	LIFSDSAPPLNPAELAAFTLVQAK
1	85	19	19	19	1	1	1	103	19	19	0	LEPALPYIDYFMPGLDEAR	|||||||||||||||||||	LEPALPYIDYFMPGLDEAR
1	89	12	12	12	1	1	1	57	12	12	0	VPVPLVIESQVK	||||||||||||	VPVPLVIESQVK
1	94	8	8	8	1	1	1	41	8	8	0	SPAHILEK	||||||||	SPAHILEK
1	96	24	24	24	1	1	1	113	24	24	0	RIETQLEQPVEQSTLVSTAAVNKE	||||||||||||||||||||||||	RIETQLEQPVEQSTLVSTAAVNKE
1	103	28	28	28	1	1	1	132	28	28	0	IDSLITPQQLAEKLPISEVIADNVTASR	||||||||||||||||||||||||||||	IDSLITPQQLAEKLPISEVIADNVTASR
1	112	15	15	15	1	1	1	82	15	15	0	EGLDVNSHGENAYNQ	|||||||||||||||	EGLDVNSHGENAYNQ
1	116	10	10	10	1	1	1	49	10	10	0	NIDVDKIEAK	||||||||||	NIDVDKIEAK
1	122	22	22	22	1	1	1	116	22	22	0	NHNLGASVSALTLEHYPGMTEK	||||||||||||||||||||||	NHNLGASVSALTLEHYPGMTEK
1	124	24	24	24	1	1	1	126	24	24	0	IYLTEAWPITTYPAILLQTPLEVK	||||||||||||||||||||||||	IYLTEAWPITTYPAILLQTPLEVK
1	131	17	17	17	1	1	1	82	17	17	0	SSAKLLDQLHAVILLCR	|||||||||||||||||	SSAKLLDQLHAVILLCR
1	138	15	15	15	1	1	1	80	15	15	0	DGQNDSDTVSPLDFK	|||||||||||||||	DGQNDSDTVSPLDFK
1	139	12	12	12	1	1	1	57	12	12	0	MEQQLQNSSLKR	||||||||||||	MEQQLQNSSLKR
1	141	24	24	24	1	1	1	120	24	24	0	MLDLADNLSEWLSQAPLSLEEEQR	||||||||||||||||||||||||	MLDLADNLSEWLSQAPLSLEEEQR
1	144	27	27	27	1	1	1	135	27	27	0	RGHRPDLDDDELASSMALSPELIAQLK	|||||||||||||||||||||||||||	RGHRPDLDDDELASSMALSPELIAQLK
1	146	8	8	8	1	1	1	43	8	8	0	DSLGLDQH	||||||||	DSLGLDQH
1	151	16	16	16	1	1	1	87	16	16	0	HGISYIYVTQHLGMMK	||||||||||||||||	HGISYIYVTQHLGMMK
1	159	22	22	22	1	1	1	112	22	22	0	TIAETLNVTHTTVSNVFNRPEK	||||||||||||||||||||||	TIAETLNVTHTTVSNVFNRPEK
1	160	19	19	19	1	1	1	100	19	19	0	TATPADFAEIWPLFQAVIR	|||||||||||||||||||	TATPADFAEIWPLFQAVIR
1	162	26	26	26	1	1	1	137	26	26	0	NQADDPLGSETQAGSPSYDTAYADTR	||||||||||||||||||||||||||	NQADDPLGSETQAGSPSYDTAYADTR
1	165	11	11	11	1	1	1	57	11	11	0	FTQDFLALQYK	|||||||||||	FTQDFLALQYK
1	166	10	10	10	1	1	1	50	10	10	0	GMDHVIALIR	||||||||||	GMDHVIALIR
1	168	17	17	17	1	1	1	81	17	17	0	LQPQAAEAFQAMQQAAK	|||||||||||||||||	LQPQAAEAFQAMQQAAK
1	173	19	19	19	1	1	1	92	19	19	0	ANVSIPASAASETPVSTPD	|||||||||||||||||||	ANVSIPASAASETPVSTPD
1	174	16	16	16	1	1	1	90	16	16	0	QGANSPTLDDTGYNPD	||||||||||||||||	QGANSPTLDDTGYNPD
1	175	18	18	18	1	1	1	84	18	18	0	MVENALLEIPSGLVEAAR	||||||||||||||||||	MVENALLEIPSGLVEAAR
1	178	22	22	22	1	1	1	106	22	22	0	SAGLNVQDFAIAGIDGVSDAIR	||||||||||||||||||||||	SAGLNVQDFAIAGIDGVSDAIR
1	181	25	25	25	1	1	1	132	25	25	0	HSSTPEGTPDDSAVPSAFEKPSAGR	|||||||||||||||||||||||||	HSSTPEGTPDDSAVPSAFEKPSAGR
1	183	14	14	14	1	1	1	76	14	14	0	THGSGNPGATNVLR	||||||||||||||	THGSGNPGATNVLR
1	186	23	23	23	1	1	1	127	23	23	0	IRPNQQGLSLPDGFYLYQHLNGR	|||||||||||||||||||||||	IRPNQQGLSLPDGFYLYQHLNGR
1	187	14	14	14	1	1	1	72	14	14	0	KQLETDRELLEKDH	||||||||||||||	KQLETDRELLEKDH
1	190	31	31	31	1	1	1	156	31	31	0	ELATFAYEHNAVFLVENYVNNIIGSVGQVAR	|||||||||||||||||||||||||||||||	ELATFAYEHNAVFLVENYVNNIIGSVGQVAR
1	194	9	9	9	1	1	1	49	9	9	0	LFQPSPFFL	|||||||||	LFQPSPFFL
1	199	16	16	16	1	1	1	86	16	16	0	LREQHPEIVPSEHLNK	||||||||||||||||	LREQHPEIVPSEHLNK
1	206	14	14	14	1	1	1	65	14	14	0	LKQVLNQAVQSFLK	||||||||||||||	LKQVLNQAVQSFLK
1	207	9	9	9	1	1	1	40	9	9	0	SAFVVEAAR	|||||||||	SAFVVEAAR
1	209	38	38	38	1	1	1	179	38	38	0	KNDVAIAALPVSEVLDELLSALQSSSQVLLHAPTGAGK	||||||||||||||||||||||||||||||||||||||	KNDVAIAALPVSEVLDELLSALQSSSQVLLHAPTGAGK
1	213	15	15	15	1	1	1	70	15	15	0	MQTSPLLESLMEALR	|||||||||||||||	MQTSPLLESLMEALR
1	216	25	25	25	1	1	1	135	25	25	0	FHKGIEGIGFTQTRNTVNGGFSPLR	|||||||||||||||||||||||||	FHKGIEGIGFTQTRNTVNGGFSPLR
1	217	20	20	20	1	1	1	102	20	20	0	SEHLSKDPLHGITLEQLLTK	||||||||||||||||||||	SEHLSKDPLHGITLEQLLTK
1	219	13	13	13	1	1	1	66	13	13	0	ELEDALGFPLFIR	|||||||||||||	ELEDALGFPLFIR
1	221	14	14	14	1	1	1	68	14	14	0	GIPAAIVTAFLGQR	||||||||||||||	GIPAAIVTAFLGQR
1	223	29	29	29	1	1	1	137	29	29	0	EIQQQYGEQQASLAVEAAFAGLANELLAR	|||||||||||||||||||||||||||||	EIQQQYGEQQASLAVEAAFAGLANELLAR
1	225	23	23	23	1	1	1	108	23	23	0	FNLIYTIGSEFASAVSQAASEAR	|||||||||||||||||||||||	FNLIYTIGSEFASAVSQAASEAR
1	229	24	24	24	1	1	1	128	24	24	0	YHLLPHLSAAHNVEVPAVYAGLGK	||||||||||||||||||||||||	YHLLPHLSAAHNVEVPAVYAGLGK
1	233	18	18	18	1	1	1	94	18	18	0	AHDATVAVGTNQTGTNNR	||||||||||||||||||	AHDATVAVGTNQTGTNNR
1	236	11	11	11	1	1	1	62	11	11	0	GHLYAHQGLEK	|||||||||||	GHLYAHQGLEK
1	238	25	25	25	1	1	1	131	25	25	0	ALVNQPPIIFADEPTGNLDEENEQR	|||||||||||||||||||||||||	ALVNQPPIIFADEPTGNLDEENEQR
1	239	10	10	10	1	1	1	49	10	10	0	DEIVDGLTAR	||||||||||	DEIVDGLTAR
1	246	18	18	18	1	1	1	93	18	18	0	QPQDPLLAPLFTLIEQGK	||||||||||||||||||	QPQDPLLAPLFTLIEQGK
1	251	23	23	23	1	1	1	112	23	23	0	VPAELLASFGKPQFAMLLALNER	|||||||||||||||||||||||	VPAELLASFGKPQFAMLLALNER
1	254	17	17	17	1	1	1	79	17	17	0	NITQLDELVQEAEALLR	|||||||||||||||||	NITQLDELVQEAEALLR
1	256	19	19	19	1	1	1	105	19	19	0	ISELGNNVMNFPYLPGNKP	|||||||||||||||||||	ISELGNNVMNFPYLPGNKP
1	260	16	16	16	1	1	1	78	16	16	0	NKAQGKASTELAANNK	||||||||||||||||	NKAQGKASTELAANNK
1	261	18	18	18	1	1	1	83	18	18	0	MMALIKIGASGAISGAKR	||||||||||||||||||	MMALIKIGASGAISGAKR
1	262	13	13	13	1	1	1	66	13	13	0	VELSHKPISHALK	|||||||||||||	VELSHKPISHALK
1	263	13	13	13	1	1	1	74	13	13	0	SHYDHLMLQLHDK	|||||||||||||	SHYDHLMLQLHDK
1	265	19	19	19	1	1	1	98	19	19	0	KRKQLRIEFFRYFFDELIR	|||||||||||||||||||	KRKQLRIEFFRYFFDELIR
1	269	14	14	14	1	1	1	67	14	14	0	SGVNTYLNSVSSIK	||||||||||||||	SGVNTYLNSVSSIK
1	273	15	15	15	1	1	1	70	15	15	0	DLADVSISYLNLSSK	|||||||||||||||	DLADVSISYLNLSSK
1	274	26	26	26	1	1	1	134	26	26	0	PQLDEHYLVITALGADRPGIVNTITR	||||||||||||||||||||||||||	PQLDEHYLVITALGADRPGIVNTITR
1	280	23	23	23	1	1	1	114	23	23	0	TSDMLDTTIDLINVLSEQYNIDK	|||||||||||||||||||||||	TSDMLDTTIDLINVLSEQYNIDK
1	281	12	12	12	1	1	1	61	12	12	0	GSQVTDSHGLVR	||||||||||||	GSQVTDSHGLVR
1	288	18	18	18	1	1	1	87	18	18	0	LDLVNREEFDVQTQVLLR	||||||||||||||||||	LDLVNREEFDVQTQVLLR
1	292	11	11	11	1	1	1	56	11	11	0	HALGLHTAISR	|||||||||||	HALGLHTAISR
1	294	12	12	12	1	1	1	56	12	12	0	LVAEEVQNFSAK	||||||||||||	LVAEEVQNFSAK
1	295	25	25	25	1	1	1	119	25	25	0	AAQQLLDQLSNSQPIQQIIIPGQLV	|||||||||||||||||||||||||	AAQQLLDQLSNSQPIQQIIIPGQLV
1	302	35	35	35	1	1	1	169	35	35	0	AQSGNLEGMNVLLRPISADVLENLINTAASSFVYR	|||||||||||||||||||||||||||||||||||	AQSGNLEGMNVLLRPISADVLENLINTAASSFVYR
1	303	12	12	12	1	1	1	60	12	12	0	DLDLLTLDLQPQ	||||||||||||	DLDLLTLDLQPQ
1	305	16	16	16	1	1	1	73	16	16	0	DAIALNGSAEASQLSR	||||||||||||||||	DAIALNGSAEASQLSR
1	313	13	13	13	1	1	1	66	13	13	0	NGNVQAITQDDAK	|||||||||||||	NGNVQAITQDDAK
1	316	15	15	15	1	1	1	75	15	15	0	VSSAPLWQLNLLEIK	|||||||||||||||	VSSAPLWQLNLLEIK
1	318	16	16	16	1	1	1	80	16	16	0	DDIDAEQSTQEPLSER	||||||||||||||||	DDIDAEQSTQEPLSER
1	319	11	11	11	1	1	1	58	11	11	0	MPGLGLFNTLK	|||||||||||	MPGLGLFNTLK
1	322	17	17	17	1	1	1	89	17	17	0	FRCFSFLSGELGNTLSR	|||||||||||||||||	FRCFSFLSGELGNTLSR
1	328	19	19	19	1	1	1	96	19	19	0	ISWEEAFETIAGSMQNIIK	|||||||||||||||||||	ISWEEAFETIAGSMQNIIK
1	335	16	16	16	1	1	1	79	16	16	0	DGSALLTHLLDADLQR	||||||||||||||||	DGSALLTHLLDADLQR
1	338	18	18	18	1	1	1	92	18	18	0	WLEAVLPLFQPVSEVTIR	||||||||||||||||||	WLEAVLPLFQPVSEVTIR
1	342	12	12	12	1	1	1	57	12	12	0	AKFLSSELKEFK	||||||||||||	AKFLSSELKEFK
1	346	15	15	15	1	1	1	76	15	15	0	ADNPFDALLPSAMAK	|||||||||||||||	ADNPFDALLPSAMAK
1	351	12	12	12	1	1	1	63	12	12	0	YNMPVIPEMVAR	||||||||||||	YNMPVIPEMVAR
1	352	31	31	31	1	1	1	159	31	31	0	KPVSLTPDTDLDTDLSIDELEIEDLMNDFFK	|||||||||||||||||||||||||||||||	KPVSLTPDTDLDTDLSIDELEIEDLMNDFFK
1	353	22	22	22	1	1	1	106	22	22	0	VSGLSGSKGEVASAITSWVEVR	||||||||||||||||||||||	VSGLSGSKGEVASAITSWVEVR
1	355	29	29	29	1	1	1	136	29	29	0	TAVNQLISALAQSIPLLDIEPLQANKLEK	|||||||||||||||||||||||||||||	TAVNQLISALAQSIPLLDIEPLQANKLEK
1	359	19	19	19	1	1	1	105	19	19	0	VDRPQGGGGGGSGQGNAGK	|||||||||||||||||||	VDRPQGGGGGGSGQGNAGK
1	363	15	15	15	1	1	1	68	15	15	0	YQVSSLAELQALLFA	|||||||||||||||	YQVSSLAELQALLFA
1	364	18	18	18	1	1	1	93	18	18	0	YFGVSNFTPTQFSLLQSR	||||||||||||||||||	YFGVSNFTPTQFSLLQSR
1	365	12	12	12	1	1	1	59	12	12	0	GVGLYLIEETLR	||||||||||||	GVGLYLIEETLR
1	366	15	15	15	1	1	1	75	15	15	0	VVGAEQTENNQDVEK	|||||||||||||||	VVGAEQTENNQDVEK
1	367	13	13	13	1	1	1	69	13	13	0	NDLGLVVACLPYA	|||||||||||||	NDLGLVVACLPYA
1	369	30	30	30	1	1	1	153	30	30	0	KPVQDENKIAGSVLGAVAGGVLGHQVGGGR	||||||||||||||||||||||||||||||	KPVQDENKIAGSVLGAVAGGVLGHQVGGGR
1	370	24	24	24	1	1	1	116	24	24	0	LLLVGNPDTITPLLANADSLLLER	||||||||||||||||||||||||	LLLVGNPDTITPLLANADSLLLER
1	371	18	18	18	1	1	1	101	18	18	0	KVPLHPAIISNYPLDWVK	||||||||||||||||||	KVPLHPAIISNYPLDWVK
1	375	11	11	11	1	1	1	55	11	11	0	GLGHLALGLAK	|||||||||||	GLGHLALGLAK
1	376	11	11	11	1	1	1	54	11	11	0	ERDYLVTELSR	|||||||||||	ERDYLVTELSR
1	377	34	34	34	1	1	1	169	34	34	0	LGVAIPAEMAISGFHGLDIGQATTPILASVTTPR	||||||||||||||||||||||||||||||||||	LGVAIPAEMAISGFHGLDIGQATTPILASVTTPR
1	378	11	11	11	1	1	1	55	11	11	0	FSSVEQEQQYR	|||||||||||	FSSVEQEQQYR
1	382	26	26	26	1	1	1	130	26	26	0	AQAQLLLDVYQHTLPASAESLWLQIR	||||||||||||||||||||||||||	AQAQLLLDVYQHTLPASAESLWLQIR
1	386	19	19	19	1	1	1	93	19	19	0	VNPDMVFSLPLLGSELLVR	|||||||||||||||||||	VNPDMVFSLPLLGSELLVR
1	388	18	18	18	1	1	1	87	18	18	0	DTQLMLLQEAQTTPELVR	||||||||||||||||||	DTQLMLLQEAQTTPELVR
1	391	28	28	28	1	1	1	148	28	28	0	ILAINPECHVTCIDDFITADNVAELLNK	||||||||||||||||||||||||||||	ILAINPECHVTCIDDFITADNVAELLNK
1	394	14	14	14	1	1	1	67	14	14	0	DITEGSQVQVSNLR	||||||||||||||	DITEGSQVQVSNLR
1	397	13	13	13	1	1	1	77	13	13	0	NVETSELFDIWWD	|||||||||||||	NVETSELFDIWWD
1	401	15	15	15	1	1	1	78	15	15	0	NIENPLLLLGTFTPR	|||||||||||||||	NIENPLLLLGTFTPR
1	402	15	15	15	1	1	1	68	15	15	0	ISSSISLMFFISANR	|||||||||||||||	ISSSISLMFFISANR
1	403	16	16	16	1	1	1	79	16	16	0	LAQGDGLTPSTVSGVK	||||||||||||||||	LAQGDGLTPSTVSGVK
1	407	8	8	8	1	1	1	41	8	8	0	AGAERKYR	||||||||	AGAERKYR
1	410	15	15	15	1	1	1	85	15	15	0	HVRPHEQVIGIFPPE	|||||||||||||||	HVRPHEQVIGIFPPE
1	417	14	14	14	1	1	1	87	14	14	0	TMAPNWWQQLGFYR	||||||||||||||	TMAPNWWQQLGFYR
1	420	13	13	13	1	1	1	67	13	13	0	AQYLIAKYPDTVE	|||||||||||||	AQYLIAKYPDTVE
1	421	26	26	26	1	1	1	130	26	26	0	RQGLSLSGGDPLHPQNLSAILQLVQR	||||||||||||||||||||||||||	RQGLSLSGGDPLHPQNLSAILQLVQR
1	426	22	22	22	1	1	1	105	22	22	0	STVANAFANLGVPLVDADIIAR	||||||||||||||||||||||	STVANAFANLGVPLVDADIIAR
1	429	12	12	12	1	1	1	59	12	12	0	IHGLLVQSMANR	||||||||||||	IHGLLVQSMANR
1	431	14	14	14	1	1	1	69	14	14	0	DLVTSQAGESGDQK	||||||||||||||	DLVTSQAGESGDQK
1	441	24	24	24	1	1	1	125	24	24	0	STLLSLITGDHPQGYSNDLTLFGR	||||||||||||||||||||||||	STLLSLITGDHPQGYSNDLTLFGR
1	443	26	26	26	1	1	1	132	26	26	0	LEQGQYGAEDIEQTGQQASDSEYATR	||||||||||||||||||||||||||	LEQGQYGAEDIEQTGQQASDSEYATR
1	446	13	13	13	1	1	1	66	13	13	0	KVRRVCIAINPLK	|||||||||||||	KVRRVCIAINPLK
1	449	13	13	13	1	1	1	65	13	13	0	FIPLQGLILTPLM	|||||||||||||	FIPLQGLILTPLM
1	450	18	18	18	1	1	1	92	18	18	0	SQVVQSGPANNDLDNELD	||||||||||||||||||	SQVVQSGPANNDLDNELD
1	459	17	17	17	1	1	1	79	17	17	0	GAFPSITEVASAAQLSR	|||||||||||||||||	GAFPSITEVASAAQLSR
1	460	15	15	15	1	1	1	77	15	15	0	LPVHAVVTGGQPLVR	|||||||||||||||	LPVHAVVTGGQPLVR
1	462	18	18	18	1	1	1	89	18	18	0	YSLAPADIPLLDAFIAQR	||||||||||||||||||	YSLAPADIPLLDAFIAQR
1	465	11	11	11	1	1	1	53	11	11	0	KASPQSAGQIR	|||||||||||	KASPQSAGQIR
1	475	22	22	22	1	1	1	115	22	22	0	HHGLQGLLVEGGNLGLENAELR	||||||||||||||||||||||	HHGLQGLLVEGGNLGLENAELR
1	477	15	15	15	1	1	1	78	15	15	0	GTLDWQVSPSQLLAK	|||||||||||||||	GTLDWQVSPSQLLAK
1	478	18	18	18	1	1	1	97	18	18	0	DNGTARDNGTAGNNGTAR	||||||||||||||||||	DNGTARDNGTAGNNGTAR
1	481	15	15	15	1	1	1	80	15	15	0	VLIDLPEEYLLWFAR	|||||||||||||||	VLIDLPEEYLLWFAR
1	484	13	13	13	1	1	1	70	13	13	0	DIDGNNDIDGLTK	|||||||||||||	DIDGNNDIDGLTK
1	485	16	16	16	1	1	1	88	16	16	0	GVSHYLTTHTQAFYQR	||||||||||||||||	GVSHYLTTHTQAFYQR
1	488	13	13	13	1	1	1	68	13	13	0	IALKPYLGGKPLK	|||||||||||||	IALKPYLGGKPLK
1	491	25	25	25	1	1	1	129	25	25	0	TGKPVTAEGEAAADWVLNSLADLPK	|||||||||||||||||||||||||	TGKPVTAEGEAAADWVLNSLADLPK
1	493	26	26	26	1	1	1	150	26	26	0	GQHFDIYQGIGHEAGQAAGFYNHYGR	||||||||||||||||||||||||||	GQHFDIYQGIGHEAGQAAGFYNHYGR
1	494	14	14	14	1	1	1	68	14	14	0	KLSLTHAGEATLER	||||||||||||||	KLSLTHAGEATLER
1	500	8	8	8	1	1	1	48	8	8	0	WGIGYLQK	||||||||	WGIGYLQK
1	506	28	28	28	1	1	1	140	28	28	0	GVGAHLLALANQHADSASNPRPVTLLIR	||||||||||||||||||||||||||||	GVGAHLLALANQHADSASNPRPVTLLIR
1	509	16	16	16	1	1	1	82	16	16	0	QQAVYAPLMEYIADNR	||||||||||||||||	QQAVYAPLMEYIADNR
1	510	15	15	15	1	1	1	72	15	15	0	GKGLATLLYEELVVK	|||||||||||||||	GKGLATLLYEELVVK
1	514	15	15	15	1	1	1	83	15	15	0	SHRFDIYPSSVTPPR	|||||||||||||||	SHRFDIYPSSVTPPR
1	518	16	16	16	1	1	1	82	16	16	0	LHQHALPSMDFVVLVK	||||||||||||||||	LHQHALPSMDFVVLVK
1	519	25	25	25	1	1	1	142	25	25	0	TRQHAIFCRYPPLALAFQKAWNTFF	|||||||||||||||||||||||||	TRQHAIFCRYPPLALAFQKAWNTFF
1	524	15	15	15	1	1	1	80	15	15	0	KLEHVASWQGINVER	|||||||||||||||	KLEHVASWQGINVER
1	525	15	15	15	1	1	1	69	15	15	0	TGAIDILATSASNAR	|||||||||||||||	TGAIDILATSASNAR
1	526	13	13	13	1	1	1	63	13	13	0	SFAPIFAETAAER	|||||||||||||	SFAPIFAETAAER
1	527	25	25	25	1	1	1	126	25	25	0	MISMDWPAYILQMETLLAVALDEQR	|||||||||||||||||||||||||	MISMDWPAYILQMETLLAVALDEQR
1	530	22	22	22	1	1	1	102	22	22	0	NSSVITELLSLSCSSELSVTAP	||||||||||||||||||||||	NSSVITELLSLSCSSELSVTAP
1	531	13	13	13	1	1	1	60	13	13	0	DLSEIINQITAAK	|||||||||||||	DLSEIINQITAAK
1	533	19	19	19	1	1	1	87	19	19	0	NSAIASTIGLVEMAAQAGK	|||||||||||||||||||	NSAIASTIGLVEMAAQAGK
1	534	15	15	15	1	1	1	77	15	15	0	SPPLLGIAAYSGTGK	|||||||||||||||	SPPLLGIAAYSGTGK
1	535	26	26	26	1	1	1	131	26	26	0	TLPQLTLPALEQVVQTWQQQSAELGK	||||||||||||||||||||||||||	TLPQLTLPALEQVVQTWQQQSAELGK
1	540	35	35	35	1	1	1	178	35	35	0	FHTSWAELPASLQFALEPILSAENFPAMLTAEQVK	|||||||||||||||||||||||||||||||||||	FHTSWAELPASLQFALEPILSAENFPAMLTAEQVK
1	541	27	27	27	1	1	1	132	27	27	0	VTASANSPGCKKKASPSGRLISSLITR	|||||||||||||||||||||||||||	VTASANSPGCKKKASPSGRLISSLITR
1	544	22	22	22	1	1	1	102	22	22	0	AGIALPILNPESAILIQLSAVN	||||||||||||||||||||||	AGIALPILNPESAILIQLSAVN
1	545	16	16	16	1	1	1	89	16	16	0	DDNPTNWVAAIGPAAR	||||||||||||||||	DDNPTNWVAAIGPAAR
1	548	8	8	8	1	1	1	46	8	8	0	YHSLDIHR	||||||||	YHSLDIHR
1	549	36	36	36	1	1	1	176	36	36	0	VGEAGAQLLSSLIAPNDVLGVSWGQTVLALSHAITR	||||||||||||||||||||||||||||||||||||	VGEAGAQLLSSLIAPNDVLGVSWGQTVLALSHAITR
1	556	10	10	10	1	1	1	65	10	10	0	APWFHHQEGK	||||||||||	APWFHHQEGK
1	561	23	23	23	1	1	1	120	23	23	0	AAWMYYVAGQTQHEIAEALGVSR	|||||||||||||||||||||||	AAWMYYVAGQTQHEIAEALGVSR
1	563	14	14	14	1	1	1	74	14	14	0	AMPFIDGTEVDYVR	||||||||||||||	AMPFIDGTEVDYVR
1	564	27	27	27	1	1	1	143	27	27	0	FDEDDELGLISVVAGLCEHLEFCDSAK	|||||||||||||||||||||||||||	FDEDDELGLISVVAGLCEHLEFCDSAK
1	574	31	31	31	1	1	1	159	31	31	0	WSAEYIPGIFRPELVDQVLDITQSVAEQTMR	|||||||||||||||||||||||||||||||	WSAEYIPGIFRPELVDQVLDITQSVAEQTMR
1	575	30	30	30	1	1	1	160	30	30	0	LGAGGDFAQAYVIAHEVGHHVQHLMGIDAK	||||||||||||||||||||||||||||||	LGAGGDFAQAYVIAHEVGHHVQHLMGIDAK
1	576	34	34	34	1	1	1	160	34	34	0	AIAIEPEVLLLDEPTSALDPISTLTIEELITTLK	||||||||||||||||||||||||||||||||||	AIAIEPEVLLLDEPTSALDPISTLTIEELITTLK
1	580	17	17	17	1	1	1	93	17	17	0	IDRHEVQQHGLTLDNPR	|||||||||||||||||	IDRHEVQQHGLTLDNPR
1	581	32	32	32	1	1	1	154	32	32	0	MFDLSSIVDNEQTSDALEDVVMGLIINAGQAR	||||||||||||||||||||||||||||||||	MFDLSSIVDNEQTSDALEDVVMGLIINAGQAR
1	583	23	23	23	1	1	1	116	23	23	0	AYVSGLSDEDFSDLAAYYASLKP	|||||||||||||||||||||||	AYVSGLSDEDFSDLAAYYASLKP
1	584	11	11	11	1	1	1	56	11	11	0	LAALGATVHHR	|||||||||||	LAALGATVHHR
1	588	27	27	27	1	1	1	130	27	27	0	VNSEALQQAGALGVIILGQEVHAIFGK	|||||||||||||||||||||||||||	VNSEALQQAGALGVIILGQEVHAIFGK
1	590	30	30	30	1	1	1	160	30	30	0	GQQLALDSYWPVMGVEYQAAPVDLNTLFGR	||||||||||||||||||||||||||||||	GQQLALDSYWPVMGVEYQAAPVDLNTLFGR
1	604	18	18	18	1	1	1	82	18	18	0	FAAIVLLLEEAEEELAGR	||||||||||||||||||	FAAIVLLLEEAEEELAGR
1	606	17	17	17	1	1	1	81	17	17	0	AAIVTFDPLAKDIVIKQ	|||||||||||||||||	AAIVTFDPLAKDIVIKQ
1	607	18	18	18	1	1	1	91	18	18	0	FGIEPEVMTEVLNTSTGR	||||||||||||||||||	FGIEPEVMTEVLNTSTGR
1	610	18	18	18	1	1	1	104	18	18	0	ETLFSTWPGPITWVIPAR	||||||||||||||||||	ETLFSTWPGPITWVIPAR
1	611	11	11	11	1	1	1	60	11	11	0	NGGTNGDVVFR	|||||||||||	NGGTNGDVVFR
1	612	15	15	15	1	1	1	83	15	15	0	NWYHQAASLHVVTAR	|||||||||||||||	NWYHQAASLHVVTAR
1	617	26	26	26	1	1	1	129	26	26	0	QQLINAFDNSVLYTDSFIANVIDQMR	||||||||||||||||||||||||||	QQLINAFDNSVLYTDSFIANVIDQMR
1	621	13	13	13	1	1	1	69	13	13	0	GLRLTNRGTGDGR	|||||||||||||	GLRLTNRGTGDGR
1	624	10	10	10	1	1	1	51	10	10	0	KLVDHLSNER	||||||||||	KLVDHLSNER
1	628	23	23	23	1	1	1	134	23	23	0	LCANTGCQLHLIKPLGFTWDDKR	|||||||||||||||||||||||	LCANTGCQLHLIKPLGFTWDDKR
1	630	17	17	17	1	1	1	87	17	17	0	HIMVVNKPSGLLSVPGR	|||||||||||||||||	HIMVVNKPSGLLSVPGR
1	631	20	20	20	1	1	1	97	20	20	0	ASGGTGLGLAIVETAVSQHR	||||||||||||||||||||	ASGGTGLGLAIVETAVSQHR
1	634	25	25	25	1	1	1	126	25	25	0	MKINTLQSLINQQITQVGHGGQAGR	|||||||||||||||||||||||||	MKINTLQSLINQQITQVGHGGQAGR
1	635	32	32	32	1	1	1	159	32	32	0	TYSSLLEEFATELGLEEIETNELGHGAVTIDK	||||||||||||||||||||||||||||||||	TYSSLLEEFATELGLEEIETNELGHGAVTIDK
1	636	9	9	9	1	1	1	45	9	9	0	YGNISEVLR	|||||||||	YGNISEVLR
1	637	31	31	31	1	1	1	155	31	31	0	GGGTIAMLNEISSDTLEQLYSLAFNQYQSGK	|||||||||||||||||||||||||||||||	GGGTIAMLNEISSDTLEQLYSLAFNQYQSGK
1	638	15	15	15	1	1	1	68	15	15	0	SKLREELAELTAELK	|||||||||||||||	SKLREELAELTAELK
1	302	35	36	35	1	1	0.972	159	35	35	1	AQSGNLEGM-NVLLRPISADVLENLINTAASSFVYR	||||||||| ||||||||||||||||||||||||||	AQSGNLEGM*NVLLRPISADVLENLINTAASSFVYR
1	637	31	32	31	1	1	0.969	145	31	31	1	GGGTIAM-LNEISSDTLEQLYSLAFNQYQSGK	||||||| ||||||||||||||||||||||||	GGGTIAM*LNEISSDTLEQLYSLAFNQYQSGK
1	575	30	31	30	1	1	0.968	150	30	30	1	LGAGGDFAQAYVIAHEVGHHVQHLM-GIDAK	||||||||||||||||||||||||| |||||	LGAGGDFAQAYVIAHEVGHHVQHLM*GIDAK
1	590	30	31	30	1	1	0.968	150	30	30	1	GQQLALDSYWPVM-GVEYQAAPVDLNTLFGR	||||||||||||| |||||||||||||||||	GQQLALDSYWPVM*GVEYQAAPVDLNTLFGR
1	144	27	28	27	1	1	0.964	125	27	27	1	RGHRPDLDDDELASSM-ALSPELIAQLK	|||||||||||||||| |||||||||||	RGHRPDLDDDELASSM*ALSPELIAQLK
1	386	19	20	19	1	1	0.95	83	19	19	1	VNPDM-VFSLPLLGSELLVR	||||| ||||||||||||||	VNPDM*VFSLPLLGSELLVR
1	533	19	20	19	1	1	0.95	77	19	19	1	NSAIASTIGLVEM-AAQAGK	||||||||||||| ||||||	NSAIASTIGLVEM*AAQAGK
1	630	17	18	17	1	1	0.944	77	17	17	1	HIM-VVNKPSGLLSVPGR	||| ||||||||||||||	HIM*VVNKPSGLLSVPGR
1	386	19	20	19	1	1	0.95	93	19	19	0	VNPDMVFSLPLLGSELLVR	|||||||||||||||||||	VNPDMVFSLPLLGSELLVR
1	18	16	17	16	1	1	0.941	94	16	16	0	HHFPDIPVYGPQETAK	||||||||||||||||	HHFPDIPVYGPQETAK
1	509	16	17	16	1	1	0.941	82	16	16	0	QQAVYAPLMEYIADNR	||||||||||||||||	QQAVYAPLMEYIADNR
1	365	12	13	12	1	1	0.923	59	12	12	0	GVGLYLIEETLR	||||||||||||	GVGLYLIEETLR
1	122	22	24	22	1	1	0.917	116	22	22	0	NHNLGASVSALTLEHYPGMTEK	||||||||||||||||||||||	NHNLGASVSALTLEHYPGMTEK
1	449	13	16	13	1	1	0.812	65	13	13	0	FIPLQGLILTPLM	|||||||||||||	FIPLQGLILTPLM
1	89	12	16	12	1	1	0.75	57	12	12	0	VPVPLVIESQVK	||||||||||||	VPVPLVIESQVK
1	4	14	22	14	1	1	0.636	73	14	14	0	YPLHVADLASAHAR	||||||||||||||	YPLHVADLASAHAR
1	429	12	22	12	1	1	0.545	59	12	12	0	IHGLLVQSMANR	||||||||||||	IHGLLVQSMANR
1	46	33	33	32	1	0.97	0.97	159	33	33	0	DKAVFPAIAALGGM*LAPALIYLLFNGADEVTR	|||||||||||||||||||||||||||||||||	DKAVFPAIAALGGM*LAPALIYLLFNGADEVTR
1	330	32	32	31	1	0.969	0.969	150	32	32	0	DAVEAAQASLDM*AVQQYNANQALVLNTPLEK	||||||||||||||||||||||||||||||||	DAVEAAQASLDM*AVQQYNANQALVLNTPLEK
1	404	23	23	22	1	0.957	0.957	128	23	23	0	MGKLM*GRWPWRIKVSWMKQSKR	|||||||||||||||||||||||	MGKLM*GRWPWRIKVSWMKQSKR
1	345	22	22	21	1	0.955	0.955	106	22	22	0	DLSAEPTSVILLGGYVVM*DPK	||||||||||||||||||||||	DLSAEPTSVILLGGYVVM*DPK
1	267	19	19	18	1	0.947	0.947	95	19	19	0	M*RLRHYRVMNAAVMHGAR	|||||||||||||||||||	M*RLRHYRVMNAAVMHGAR
1	615	18	18	17	1	0.944	0.944	97	18	18	0	DSNIWFM*QLGHDVYQAK	||||||||||||||||||	DSNIWFM*QLGHDVYQAK
1	435	13	13	12	1	0.923	0.923	64	13	13	0	M*ITHSPHTIASR	|||||||||||||	M*ITHSPHTIASR
1	196	12	12	11	1	0.917	0.917	61	12	12	0	PNGGQQVGKM*R	||||||||||||	PNGGQQVGKM*R
1	201	12	12	11	1	0.917	0.917	58	12	12	0	CTVAKLGM*GIR	||||||||||||	CTVAKLGM*GIR
1	521	12	12	11	1	0.917	0.917	55	12	12	0	LNSEGM*QTVQK	||||||||||||	LNSEGM*QTVQK
1	521	12	13	11	1	0.917	0.846	55	12	12	0	LNSEGM*QTVQK	||||||||||||	LNSEGM*QTVQK
1	149	11	11	10	1	0.909	0.909	52	11	11	0	DVM*EQPTVQR	|||||||||||	DVM*EQPTVQR
1	424	10	10	9	1	0.9	0.9	46	10	10	0	LQQNNQEM*V	||||||||||	LQQNNQEM*V
0.917	521	12	12	11	0.917	0.917	0.917	44	11	11	1	LNSEGM*QTVQK	|||||| |||||	LNSEGM-QTVQK
0.963	144	27	26	26	0.963	0.963	1	130	26	26	0	GHRPDLDDDELASSMALSPELIAQLK	||||||||||||||||||||||||||	GHRPDLDDDELASSMALSPELIAQLK
0.957	622	23	22	22	0.957	0.957	1	116	22	22	0	ATSGEEWVGILQGPLPQESGIK	||||||||||||||||||||||	ATSGEEWVGILQGPLPQESGIK
0.947	386	19	18	18	0.947	0.947	1	89	18	18	0	NPDMVFSLPLLGSELLVR	||||||||||||||||||	NPDMVFSLPLLGSELLVR
0.92	634	25	23	23	0.92	0.92	1	116	23	23	0	INTLQSLINQQITQVGHGGQAGR	|||||||||||||||||||||||	INTLQSLINQQITQVGHGGQAGR
0.867	638	15	13	13	0.867	0.867	1	59	13	13	0	LREELAELTAELK	|||||||||||||	LREELAELTAELK
0.733	369	30	22	22	0.733	0.733	1	110	22	22	0	IAGSVLGAVAGGVLGHQVGGGR	||||||||||||||||||||||	IAGSVLGAVAGGVLGHQVGGGR
0.577	317	26	15	15	0.577	0.577	1	76	15	15	0	QNTLSISAGPKTHSR	|||||||||||||||	QNTLSISAGPKTHSR
0.467	80	15	7	7	0.467	0.467	1	37	7	7	0	HQGQLIK	|||||||	HQGQLIK
0.944	145	18	18	17	0.944	0.944	0.944	84	17	17	0	QQDLSATPQTPSTAESQ	|||||||||||||||||	QQDLSATPQTPSTAESQ
0.81	67	21	18	17	0.81	0.81	0.944	98	17	17	0	YVNPCVNGVSAGSWPLK	|||||||||||||||||	YVNPCVNGVSAGSWPLK
0.968	574	31	32	30	0.968	0.968	0.938	154	30	30	0	WSAEYIPGIFRPELVDQVLDITQSVAEQTM	||||||||||||||||||||||||||||||	WSAEYIPGIFRPELVDQVLDITQSVAEQTM
0.682	632	22	16	15	0.682	0.682	0.938	77	15	15	0	YDGPTQALVDGSAAK	|||||||||||||||	YDGPTQALVDGSAAK
0.96	634	25	26	24	0.96	0.96	0.923	121	24	24	0	KINTLQSLINQQITQVGHGGQAGR	||||||||||||||||||||||||	KINTLQSLINQQITQVGHGGQAGR
0.929	324	14	15	13	0.929	0.929	0.867	71	13	13	0	NEKHPGPLVVSGK	|||||||||||||	NEKHPGPLVVSGK
0.875	151	16	18	14	0.875	0.875	0.778	77	14	14	0	HGISYIYVTQHLGM	||||||||||||||	HGISYIYVTQHLGM
0.4	542	25	16	10	0.4	0.4	0.625	48	10	10	0	ILASVLTMCR	||||||||||	ILASVLTMCR
0.241	513	29	12	7	0.241	0.241	0.583	41	7	7	0	GVQFHPE	|||||||	GVQFHPE
0.241	513	29	13	7	0.241	0.241	0.538	41	7	7	0	GVQFHPE	|||||||	GVQFHPE
0.241	513	29	14	7	0.241	0.241	0.5	41	7	7	0	GVQFHPE	|||||||	GVQFHPE
0.28	527	25	27	7	0.28	0.28	0.259	36	7	7	0	PAYILQM	|||||||	PAYILQM
0.533	562	15	31	8	0.533	0.533	0.258	36	8	8	0	ETLALVEQ	||||||||	ETLALVEQ
0.28	527	25	28	7	0.28	0.28	0.25	36	7	7	0	PAYILQM	|||||||	PAYILQM
0.28	527	25	28	7	0.28	0.28	0.25	36	7	7	0	PAYILQM	|||||||	PAYILQM
1	623	30	30	28	0.967	0.933	0.933	138	29	30	0	DGGIALSGSTADFSTEDM*IQAM*TPEAQK	||||||||:|||||||||||||||||||||	DGGIALSGATADFSTEDM*IQAM*TPEAQK
0.9	167	10	10	9	0.9	0.9	0.9	39	9	9	0	SVITQSPEM*	||.|||||||	SVTTQSPEM*
1	169	32	32	32	0.969	1	1	157	31	32	0	EEDIPVTADSVLFGLSALAQYIEDPEEVYFVK	||||||||||:|||||||||||||||||||||	EEDIPVTADSLLFGLSALAQYIEDPEEVYFVK
1	169	32	38	32	0.969	1	0.842	157	31	32	0	EEDIPVTADSVLFGLSALAQYIEDPEEVYFVK	||||||||||:|||||||||||||||||||||	EEDIPVTADSLLFGLSALAQYIEDPEEVYFVK
0.968	226	31	31	31	0.968	1	1	156	30	30	0	IGDITLDDDLAPGEYRPLTAEEIASVGAPHL	|||||||||||||||||||.|||||||||||	IGDITLDDDLAPGEYRPLTTEEIASVGAPHL
1	19	21	21	21	0.952	1	1	108	20	21	0	LPIGLDHLPDLQQLPQLLNEK	||:||||||||||||||||||	LPLGLDHLPDLQQLPQLLNEK
0.941	177	17	17	17	0.941	1	1	85	16	16	0	HDLGLTENTQTPAGTQR	||||||||.||||||||	HDLGLTENIQTPAGTQR
0.846	180	13	13	12	0.846	0.923	0.923	55	11	11	0	LFAAEQTPANQS	|||.||||||||	LFAVEQTPANQS
0.353	576	34	28	12	0.324	0.353	0.429	54	11	12	0	VLLLDEPTSALD	:|||||||||||	LLLLDEPTSALD
0.75	596	12	10	10	0.75	0.833	1	47	9	9	0	NGLGEPIDGK	|.||||||||	NTLGEPIDGK
0.615	45	13	20	9	0.615	0.692	0.45	37	8	8	0	LLEHLIEQL	||||||.||	LLEHLIPQL
0.421	359	19	11	8	0.368	0.421	0.727	41	7	8	0	GGGGGSGQ	|||||||:	GGGGGSGK
0.421	359	19	13	8	0.368	0.421	0.615	41	7	8	0	GGGGGSGQ	|||||||:	GGGGGSGK
0.421	359	19	14	8	0.368	0.421	0.571	41	7	8	0	GGGGGSGQ	|||||||:	GGGGGSGK
0.421	359	19	15	8	0.368	0.421	0.533	41	7	8	0	GGGGGSGQ	|||||||:	GGGGGSGK
0.421	359	19	16	8	0.368	0.421	0.5	41	7	8	0	GGGGGSGQ	|||||||:	GGGGGSGK
0.421	359	19	17	8	0.368	0.421	0.471	41	7	8	0	GGGGGSGQ	|||||||:	GGGGGSGK
0.421	359	19	20	8	0.368	0.421	0.4	41	7	8	0	GGGGGSGQ	|||||||:	GGGGGSGK
0.421	359	19	21	8	0.368	0.421	0.381	41	7	8	0	GGGGGSGQ	|||||||:	GGGGGSGK
0.28	61	25	15	8	0.28	0.32	0.533	39	7	7	0	LHADYGSV	||||||.|	LHADYGGV
0.219	635	32	14	8	0.219	0.25	0.571	38	7	7	0	GHGAVTID	||||||.|	GHGAVTAD
0.316	256	19	17	7	0.316	0.368	0.412	36	6	6	0	YLPGNKP	||||.||	YLPGGKP
0.214	210	28	22	7	0.214	0.25	0.318	36	6	6	0	GHEFIGH	|||.|||	GHEVIGH
0.214	210	28	23	7	0.214	0.25	0.304	36	6	6	0	GHEFIGH	|||.|||	GHEVIGH
0.379	490	29	17	13	0.379	0.448	0.765	66	11	11	0	DYVDLTLIHWPSP	|||||.|||||.|	DYVDLYLIHWPDP
0.917	596	12	12	12	0.833	1	1	54	10	11	0	VINGLGEPIDGK	|:|.||||||||	VVNTLGEPIDGK
0.917	596	12	33	12	0.833	1	0.364	54	10	11	0	VINGLGEPIDGK	|:|.||||||||	VVNTLGEPIDGK
0.833	596	12	11	11	0.75	0.917	1	50	9	10	0	INGLGEPIDGK	:|.||||||||	VNTLGEPIDGK
0.6	565	15	11	11	0.6	0.733	1	44	9	9	0	MPNMDGLDLLK	||.||||.|||	MPGMDGLALLK
0.688	508	16	35	11	0.562	0.688	0.343	36	9	11	1	LALLPE-QLISV	|||||| |:||:	LALLPEVQIISI
0.375	334	24	18	11	0.375	0.458	0.611	37	9	9	0	ANAIANYLPDE	||||||.|.||	ANAIANGLIDE
0.375	334	24	21	11	0.375	0.458	0.524	37	9	9	0	ANAIANYLPDE	||||||.|.||	ANAIANGLIDE
0.357	543	28	14	11	0.321	0.393	0.714	36	9	10	1	DPGLLATLQQL	|| :|||||||	DP-MLATLQQL
0.31	490	29	23	11	0.31	0.379	0.478	46	9	9	0	DYVDLTLIHWP	|||||.|||.|	DYVDLYLIHQP
0.667	596	12	10	10	0.667	0.833	1	37	8	8	0	NGLGEPIDGK	|.||||||.|	NVLGEPIDMK
0.667	596	12	13	10	0.667	0.833	0.769	37	8	8	0	NGLGEPIDGK	|.||||||.|	NVLGEPIDMK
0.667	596	12	21	10	0.667	0.833	0.476	37	8	8	0	NGLGEPIDGK	|.||||||.|	NVLGEPIDMK
0.455	40	22	23	10	0.364	0.455	0.478	37	8	10	1	DALFLGV-GTY	|||::|| |||	DALYMGVGGTY
0.364	475	22	22	10	0.364	0.455	0.455	38	8	8	0	GNLGLENAEL	|||||.||.|	GNLGLSNAVL
0.364	475	22	26	10	0.364	0.455	0.385	38	8	8	0	GNLGLENAEL	|||||.||.|	GNLGLSNAVL
0.258	226	31	13	10	0.258	0.323	0.769	39	8	8	0	ITLDDDLAPG	||..||||||	ITQGDDLAPG
0.258	226	31	14	10	0.258	0.323	0.714	39	8	8	0	ITLDDDLAPG	||..||||||	ITQGDDLAPG
0.258	226	31	15	10	0.258	0.323	0.667	39	8	8	0	ITLDDDLAPG	||..||||||	ITQGDDLAPG
0.235	576	34	31	10	0.235	0.294	0.323	41	8	8	0	LLDEPTSALD	||||||..||	LLDEPTEGLD
0.229	440	35	24	10	0.229	0.286	0.417	36	8	8	0	NWDDLPESVA	|..|||||||	NVPDLPESVA
0.4	520	30	19	14	0.367	0.467	0.737	62	11	12	0	GLDAGADDYLVKPF	||:.||||||.|||	GLELGADDYLAKPF
0.8	271	10	19	9	0.7	0.9	0.474	39	7	8	0	PQHLSGGQR	|.||||||:	PLHLSGGQQ
0.389	364	18	14	9	0.389	0.5	0.643	36	7	7	0	YFGVSNFTP	|.||||.||	YIGVSNETP
0.364	475	22	17	9	0.318	0.409	0.529	36	7	8	0	LVEGGNLGL	|:|.|||||	LIEEGNLGL
0.364	544	22	17	9	0.318	0.409	0.529	37	7	8	0	ALPILNPES	|:|||.|||	AMPILEPES
0.348	561	23	19	9	0.304	0.391	0.474	37	7	8	0	VAGQTQHEI	|.|||:|||	VDGQTEHEI
0.348	561	23	28	9	0.304	0.391	0.321	37	7	8	0	VAGQTQHEI	|.|||:|||	VDGQTEHEI
0.308	197	26	18	9	0.269	0.346	0.5	38	7	8	0	YLLQQGFDV	||||||:.|	YLLQQGYQV
0.308	197	26	29	9	0.269	0.346	0.31	37	7	8	0	QYLLQQGFD	|.|||||:|	QILLQQGYD
0.22	109	41	9	9	0.171	0.22	1	36	7	9	0	ARGIQLAAK	|:|:|||||	AQGVQLAAK
0.22	109	41	22	9	0.171	0.22	0.409	36	7	9	0	ARGIQLAAK	|:|:|||||	AQGVQLAAK
0.22	109	41	23	9	0.171	0.22	0.391	36	7	9	0	ARGIQLAAK	|:|:|||||	AQGVQLAAK
0.333	425	30	14	13	0.333	0.433	0.929	41	10	10	0	QLLDVLFDDAVAA	||..||.||||||	QLTHVLSDDAVAA
0.382	576	34	25	16	0.353	0.471	0.6	47	12	13	1	LLLDEPTSALDPISTL	|||||||:.|| |.||	LLLDEPTNDLD-IETL
0.333	610	18	11	8	0.333	0.444	0.727	37	6	6	0	TWPGPITW	|.||||.|	TAPGPIAW
0.333	208	18	35	8	0.333	0.444	0.229	37	6	6	0	DFPLDHFD	|.||.|||	DLPLSHFD
0.4	631	20	16	8	0.3	0.4	0.5	36	6	8	0	GTGLGLAI	|||||:|:	GTGLGIAV
0.4	631	20	17	8	0.3	0.4	0.471	36	6	8	0	GTGLGLAI	|||:|||:	GTGIGLAV
0.4	631	20	18	8	0.3	0.4	0.444	36	6	8	0	GTGLGLAI	|||:|||:	GTGIGLAV
0.4	631	20	27	8	0.3	0.4	0.296	36	6	8	0	GTGLGLAI	|||||:|:	GTGLGIAV
0.308	594	26	9	8	0.231	0.308	0.889	36	6	8	0	YTYDALGR	||:||||:	YTWDALGK
0.219	231	32	20	8	0.188	0.25	0.4	37	6	7	0	QVAGWADR	|:||||.|	QIAGWAGR
0.219	231	32	21	8	0.188	0.25	0.381	37	6	7	0	QVAGWADR	|:||||.|	QIAGWAGR
0.667	63	24	33	19	0.583	0.792	0.576	69	14	16	0	PSILVFDEATSALDTHTER	|.||:.|||||||||.||:	PPILILDEATSALDTATEQ
0.353	576	34	23	15	0.324	0.441	0.652	55	11	12	0	EPEVLLLDEPTSALD	||:|.|||||.|.||	EPDVFLLDEPLSNLD
0.353	576	34	35	15	0.324	0.441	0.429	55	11	12	0	EPEVLLLDEPTSALD	||:|.|||||.|.||	EPDVFLLDEPLSNLD
0.75	596	12	11	11	0.667	0.917	1	38	8	9	0	INGLGEPIDGK	:|.||||||.|	MNVLGEPIDMK
0.643	221	14	16	11	0.571	0.786	0.688	40	8	9	0	GIPAAIVTAFL	||||||:..||	GIPAAILATFL
0.429	1	21	20	11	0.381	0.524	0.55	41	8	9	0	PKLGLSAGTDH	|:||||||..|	PQLGLSAGYTH
0.333	104	27	28	11	0.296	0.407	0.393	37	8	9	0	LLLLDEPSLGL	|||||||:..|	LLLLDEPTSAL
0.333	104	27	31	11	0.296	0.407	0.355	36	8	9	0	LLLLDEPSLGL	|.|||||:.||	LWLLDEPTEGL
0.312	635	32	10	11	0.25	0.344	1	36	8	10	1	ELGHGAVTIDK	:||||||: ||	DLGHGAVS-DK
0.312	635	32	13	11	0.25	0.344	0.769	36	8	10	1	ELGHGAVTIDK	:||||||: ||	DLGHGAVS-DK
0.211	209	38	12	11	0.211	0.289	0.917	36	8	8	0	VLLHAPTGAGK	||..||||.||	VLGSAPTGTGK
0.526	359	19	43	14	0.526	0.737	0.349	45	10	10	1	QGG-GGGGSGQGNAG	||| ||||.|.|..|	QGGMGGGGFGGGGGG
0.526	359	19	46	14	0.526	0.737	0.326	45	10	10	1	QGG-GGGGSGQGNAG	||| ||||.|.|..|	QGGMGGGGFGGGGGG
0.458	63	24	23	14	0.417	0.583	0.609	47	10	11	0	PSILVFDEATSALD	|.||:.|||.||||	PDILLMDEAFSALD
0.4	520	30	19	14	0.333	0.467	0.737	58	10	12	0	GLDAGADDYLVKPF	||:.|||||:.|||	GLEIGADDYIPKPF
0.4	520	30	19	14	0.333	0.467	0.737	60	10	12	0	GLDAGADDYLVKPF	||:.|||||:.|||	GLEIGADDYITKPF
0.412	576	34	17	17	0.353	0.5	0.941	48	12	14	1	VLLLDEPTSALDPISTL	:|||||||:.|| |.||	MLLLDEPTNDLD-IETL
0.412	576	34	24	17	0.353	0.5	0.667	49	12	14	1	VLLLDEPTSALDPISTL	||||||||:.|| |.|:	VLLLDEPTNHLD-IETI
0.412	576	34	24	17	0.353	0.5	0.667	48	12	14	1	VLLLDEPTSALDPISTL	:|||||||:.|| |.||	MLLLDEPTNDLD-IETL
0.371	540	35	29	17	0.343	0.486	0.655	37	12	13	2	ELPA--SLQFALEPILSAE	|||| ..|.||||.:|||	ELPALPYAQNALEPHISAE
0.75	596	12	13	10	0.583	0.833	0.769	39	7	9	0	VINGLGEPID	::|.||||||	IMNVLGEPID
0.533	64	15	27	10	0.467	0.667	0.37	41	7	8	0	PNGIHDEVGV	|.|:|||.||	PTGMHDEEGV
0.533	64	15	28	10	0.467	0.667	0.357	41	7	8	0	PNGIHDEVGV	|.|:|||.||	PTGMHDEEGV
0.559	576	34	31	20	0.412	0.588	0.645	80	14	19	0	AIAIEPEVLLLDEPTSALDP	|:|::|:|:|.|||||||||	ALAMQPQVILFDEPTSALDP
0.368	359	19	12	10	0.368	0.526	0.833	39	7	7	0	VDRPQGGGGG	||.|.|||.|	VDHPHGGGEG
0.368	359	19	14	10	0.368	0.526	0.714	39	7	7	0	VDRPQGGGGG	||.|.|||.|	VDHPHGGGEG
0.368	359	19	15	10	0.368	0.526	0.667	39	7	7	0	VDRPQGGGGG	||.|.|||.|	VDHPHGGGEG
0.368	359	19	16	10	0.368	0.526	0.625	39	7	7	0	VDRPQGGGGG	||.|.|||.|	VDHPHGGGEG
0.368	359	19	16	10	0.368	0.526	0.625	39	7	7	0	VDRPQGGGGG	||.|.|||.|	VDHPHGGGEG
0.368	359	19	17	10	0.368	0.526	0.588	39	7	7	0	VDRPQGGGGG	||.|.|||.|	VDHPHGGGEG
0.368	359	19	17	10	0.368	0.526	0.588	39	7	7	0	VDRPQGGGGG	||.|.|||.|	VDHPHGGGEG
0.368	359	19	18	10	0.368	0.526	0.556	39	7	7	0	VDRPQGGGGG	||.|.|||.|	VDHPHGGGEG
0.391	214	23	22	10	0.304	0.435	0.455	43	7	9	0	KPMVDISGKP	||:.||:|||	KPLADIAGKP
0.391	214	23	23	10	0.304	0.435	0.435	43	7	9	0	KPMVDISGKP	||:.||:|||	KPLADIAGKP
0.346	162	26	14	10	0.269	0.385	0.714	37	7	9	0	PSYDTAYADT	||::||||.|	PSHETAYAMT
0.259	144	27	25	10	0.259	0.37	0.4	36	7	7	0	RGHRPDLDDD	||.||.||.|	RGERPVLDQD
0.321	103	28	29	10	0.25	0.357	0.345	36	7	9	0	IDSLITPQQL	||.||:|:||	IDHLISPEQL
0.286	391	28	24	10	0.25	0.357	0.417	36	7	8	0	HVTCIDDFIT	|:|.|||.||	HLTNIDDIIT
0.276	490	29	20	10	0.241	0.345	0.5	36	7	8	0	SPNDEVSVAE	||||.||:.|	SPNDVVSIRE
0.229	440	35	12	10	0.2	0.286	0.833	36	7	8	0	VFGPGVIGLE	|.|.|:||||	VMGGGIIGLE
0.278	549	36	20	10	0.194	0.278	0.5	37	7	10	0	VLALSHAITR	||:|:||:||	VLSLNHAMTR
0.231	557	39	40	10	0.179	0.256	0.25	37	7	9	0	AIGAGAGAVG	|||||.|::|	AIGAGPGSLG
0.733	442	15	15	13	0.6	0.867	0.867	47	9	11	0	HTVLQVTPHPIM*R	||:|.|..||:|||	HTILIVDDHPLM*R
0.733	442	15	17	13	0.6	0.867	0.765	47	9	11	0	HTVLQVTPHPIM*R	||:|.|..||:|||	HTILIVDDHPLM*R
0.733	470	15	27	13	0.6	0.867	0.519	38	9	11	1	AQDFLVF-GNAYLE	|.||:|. |:||||	ANDFVVLTGDAYLE
0.733	470	15	29	13	0.6	0.867	0.483	38	9	11	1	AQDFLVF-GNAYLE	|.||:|. |:||||	ANDFVVLTGDAYLE
0.6	631	20	14	13	0.45	0.65	0.929	47	9	12	0	ASGGTGLGLAIVE	::.|||||||||:	STSGTGLGLAIVQ
0.37	437	27	16	13	0.333	0.481	0.812	38	9	10	0	IENLSATLNALRP	:|||||.|.||.|	LENLSAPLFALLP
0.333	564	27	45	13	0.333	0.481	0.289	39	9	9	0	SVVAGLCEHLEFC	||||||....|||	SVVAGLMAMNEFC
0.833	596	12	12	12	0.667	1	1	41	8	10	0	VINGLGEPIDGK	::|.||||||.|	IMNVLGEPIDMK
0.833	596	12	20	12	0.667	1	0.6	41	8	10	0	VINGLGEPIDGK	::|.||||||.|	IMNVLGEPIDMK
0.833	596	12	25	12	0.667	1	0.48	41	8	10	0	VINGLGEPIDGK	::|.||||||.|	IMNVLGEPIDMK
0.75	372	12	21	12	0.667	1	0.571	36	8	9	0	ANSTNAAPTPVR	|.|:|||||..|	AASSNAAPTGAR
0.75	372	12	30	12	0.667	1	0.4	36	8	9	0	ANSTNAAPTPVR	|.|:|||||..|	AASSNAAPTGAR
0.667	432	12	22	12	0.667	1	0.545	37	8	8	0	YTLGSLEILEIK	|.||.||.|.||	YDLGELEALSIK
0.6	556	10	24	9	0.6	0.9	0.375	36	6	6	0	PWFHHQEGK	|||..|.||	PWFIQQAGK
0.714	494	14	33	12	0.571	0.857	0.364	38	8	10	0	SLTHAGEATLER	:||.|||||:.|	ALTQAGEATIIR
0.611	283	18	28	15	0.556	0.833	0.571	38	10	11	1	GVFNIFFT-GDSALIG	|||.:..| |||||.|	GVFEVLATGGDSALGG
0.529	312	17	30	12	0.471	0.706	0.4	39	8	9	0	SLTVPSEVNEVP	||.||.|:|.||	SLIVPLELNSVP
0.6	520	30	24	21	0.467	0.7	0.875	76	14	18	0	LDAGADDYLVKPFALAELLAR	|:||||||:.|||.|.|::||	LEAGADDYVTKPFHLEEVIAR
0.5	218	14	24	9	0.429	0.643	0.375	39	6	7	0	DDPTDTHKH	|:|||.|.|	DNPTDDHHH
0.5	218	14	25	9	0.429	0.643	0.36	39	6	7	0	DDPTDTHKH	|:|||.|.|	DNPTDDHHH
0.429	543	28	36	18	0.429	0.643	0.5	45	12	12	0	GLLATLQQLAVPGALLYV	|||.||||||...||..|	GLLITLQQLAAGTALAEV
0.421	359	19	44	12	0.421	0.632	0.273	41	8	8	0	GGGGGGSGQGNA	||||.|.|.|.|	GGGGFGGGGGGA
0.421	359	19	47	12	0.421	0.632	0.255	41	8	8	0	GGGGGGSGQGNA	||||.|.|.|.|	GGGGFGGGGGGA
0.5	520	30	25	18	0.4	0.6	0.72	69	12	15	0	DRVDGLDAGADDYLVKPF	||:.||:.|||||:.|||	DRIVGLEIGADDYIPKPF
0.562	516	16	24	9	0.375	0.562	0.375	40	6	9	0	LSDNISQWL	|:||:|:||	LADNLSEWL
0.438	555	16	16	9	0.375	0.562	0.562	37	6	7	0	GDGGFYELQ	||.|.||:|	GDNGLYEIQ
0.433	520	30	17	15	0.333	0.5	0.882	62	10	13	0	GLDAGADDYLVKPFA	||:.|||||:.|||:	GLEVGADDYITKPFS
0.417	63	24	27	12	0.333	0.5	0.444	40	8	10	0	ILVFDEATSALD	:|:.||.|||||	LLLLDEPTSALD
0.417	63	24	28	12	0.333	0.5	0.429	40	8	10	0	ILVFDEATSALD	:|:.||.|||||	LLLLDEPTSALD
0.375	176	24	24	12	0.333	0.5	0.5	36	8	9	0	ALRLQQILSLHD	||...|||:|||	ALLAAQILALHD
0.375	176	24	36	12	0.333	0.5	0.333	36	8	9	0	ALRLQQILSLHD	||...|||:|||	ALLAAQILALHD
0.474	386	19	13	9	0.316	0.474	0.692	36	6	9	0	DMVFSLPLL	|||::||:|	DMVYNLPIL
0.4	71	20	18	9	0.3	0.45	0.5	38	6	8	0	PTPLTTIDD	||||.|:|:	PTPLATLDE
0.4	71	20	19	9	0.3	0.45	0.474	38	6	8	0	PTPLTTIDD	||||.|:|:	PTPLATLDE
0.4	71	20	29	9	0.3	0.45	0.31	38	6	8	0	PTPLTTIDD	||||.|:|:	PTPLATLDE
0.294	576	34	28	15	0.294	0.441	0.536	37	10	10	0	LDEPTSALDPISTLT	||...|.||.|||||	LDTLFSNLDKISTLT
0.393	307	28	22	12	0.286	0.429	0.545	36	8	11	0	LSATISSILNTG	::|.|||||:||	VAAFISSILDTG
0.364	544	22	31	9	0.273	0.409	0.29	36	6	8	0	GIALPILNP	|.|||::||	GDALPVINP
0.318	65	22	14	9	0.273	0.409	0.643	37	6	7	0	IYPLNPNPA	:|.|.||||	VYQLKPNPA
0.3	369	30	19	12	0.267	0.4	0.632	40	8	9	0	GAVAGGVLGHQV	||||||:.|..|	GAVAGGIAGQGV
0.3	369	30	26	12	0.267	0.4	0.462	40	8	9	0	GAVAGGVLGHQV	|||||||.|..:	GAVAGGVAGQGI
0.3	369	30	27	12	0.267	0.4	0.444	40	8	9	0	GAVAGGVLGHQV	|||||||.|..:	GAVAGGVAGQGI
0.32	461	25	20	9	0.24	0.36	0.45	36	6	8	0	GSLFNPASP	|.:||||:|	GLVFNPATP
0.32	461	25	45	9	0.24	0.36	0.2	36	6	8	0	GSLFNPASP	|.:||||:|	GLVFNPATP
0.32	461	25	47	9	0.24	0.36	0.191	36	6	8	0	GSLFNPASP	|.:||||:|	GLVFNPATP
0.308	197	26	21	9	0.231	0.346	0.429	36	6	8	0	LLQQGFDVV	|.|||:||:	LFQQGYDVI
0.308	197	26	27	9	0.231	0.346	0.333	36	6	8	0	LLQQGFDVV	|.|||:||:	LFQQGYDVI
0.233	304	30	12	9	0.2	0.3	0.75	36	6	7	0	LYPGFAMGR	:||||..||	IYPGFYAGR
0.29	456	31	27	9	0.194	0.29	0.333	37	6	9	0	LWLNQDLKA	|||||:::|	LWLNQNVQA
0.72	238	25	28	20	0.52	0.8	0.714	78	13	18	0	ALVNQPPIIFADEPTGNLDE	|:||:|.::.|||||||||:	AVVNKPAVLLADEPTGNLDD
0.68	238	25	21	20	0.52	0.8	0.952	77	13	17	0	ALVNQPPIIFADEPTGNLDE	:|||.|.::.|||||||||:	SLVNNPSLVLADEPTGNLDQ
0.359	557	39	22	17	0.282	0.436	0.773	60	11	14	0	GTLGGAAIGGVIGHQVG	|::.||..|||:|||||	GSVLGAVAGGVLGHQVG
0.359	557	39	30	17	0.282	0.436	0.567	60	11	14	0	GTLGGAAIGGVIGHQVG	|::.||..|||:|||||	GSVLGAVAGGVLGHQVG
0.625	134	16	17	14	0.562	0.875	0.824	41	9	10	0	GVNEVLAVMLMAAK	|.|.:|||.|.|||	GANAILAVSLAAAK
0.625	134	16	28	14	0.562	0.875	0.5	41	9	10	0	GVNEVLAVMLMAAK	|.|.:|||.|.|||	GANAILAVSLAAAK
0.545	475	22	17	14	0.409	0.636	0.882	37	9	12	1	GLQGL-LVEGGNLGL	|||.| |::.||:||	GLQFLDLIQEGNIGL
0.545	475	22	18	14	0.409	0.636	0.833	37	9	12	1	GLQGL-LVEGGNLGL	|||.| |::.||:||	GLQFLDLIQEGNIGL
0.4	455	25	15	14	0.36	0.56	0.867	36	9	10	1	PLSGGAASTGGLSA	|:.||.|.| ||||	PIIGGGAGT-GLSA
0.4	455	25	16	14	0.36	0.56	0.812	36	9	10	1	PLSGGAASTGGLSA	|:.||.|.| ||||	PIIGGGAGT-GLSA
0.357	543	28	25	14	0.321	0.5	0.56	42	9	10	0	PEDPGLLATLQQLA	|.||.||.||:.||	PFDPSLLTTLEGLA
0.379	513	29	18	14	0.31	0.483	0.778	48	9	11	0	GVQFHPESILSEQG	|||||||...::||	GVQFHPEVTHTKQG
0.333	369	30	22	14	0.3	0.467	0.636	44	9	10	0	GAVAGGVLGHQVGG	||||||:.|..|.|	GAVAGGIAGQGVQG
0.333	369	30	24	14	0.3	0.467	0.583	44	9	10	0	GAVAGGVLGHQVGG	||||||:.|..|.|	GAVAGGIAGQGVQG
0.333	369	30	33	14	0.3	0.467	0.424	44	9	10	0	GAVAGGVLGHQVGG	||||||:.|..|.|	GAVAGGIAGQGVQG
0.6	477	15	30	11	0.467	0.733	0.367	38	7	9	0	DWQVSPSQLLA	||.|:.:||||	DWAVAAAQLLA
0.533	346	15	16	11	0.467	0.733	0.688	37	7	8	0	ADNPFDALLPS	||.||..|:||	ADYPFTTLIPS
0.533	346	15	17	11	0.467	0.733	0.647	37	7	8	0	ADNPFDALLPS	||.||..|:||	ADYPFTTLIPS
0.562	205	16	25	11	0.438	0.688	0.44	39	7	9	0	IQTNDAGVTVN	|.|||.|||::	ISTNDQGVTIH
0.5	51	16	18	11	0.438	0.688	0.611	36	7	8	0	DDVASAPPSER	|.:.|.|||||	DSLISNPPSER
0.588	576	34	23	22	0.412	0.647	0.957	82	14	20	0	AIAIEPEVLLLDEPTSALDPIS	|:|::|||||:|||..||||::	ALAVDPEVLLMDEPFGALDPVT
0.444	428	18	45	11	0.389	0.611	0.244	36	7	8	0	DYLLKPLDHQR	||.|:|.|.||	DYALRPSDVQR
0.429	39	21	21	11	0.333	0.524	0.524	42	7	9	0	GFIFDELGFTP	|.:.||:||||	GTVVDEVGFTP
0.375	229	24	30	11	0.292	0.458	0.367	36	7	9	0	SAAHNVEVPAV	:||.|||:|.|	AAAANVEIPGV
0.292	229	24	15	11	0.292	0.458	0.733	36	7	7	0	LPHLSAAHNVE	|.|.|.|||.|	LTHASVAHNFE
0.32	181	25	16	11	0.28	0.44	0.688	37	7	8	0	GTPDDSAVPSA	|.||:|..|||	GVPDESQEPSA
0.32	238	25	16	11	0.28	0.44	0.688	40	7	8	0	PPIIFADEPTG	|.|:|||.|.|	PQIVFADGPVG
0.32	436	25	21	11	0.28	0.44	0.524	36	7	8	0	HIAAESTQANN	||..|:.||||	HIVDETLQANN
0.37	104	27	26	11	0.259	0.407	0.423	40	7	10	0	LLLLDEPSLGL	:.:|||||:||	MYVLDEPSIGL
0.267	575	30	23	11	0.233	0.367	0.478	37	7	8	0	GGDFAQAYVIA	|.||.|||.:|	GADFKQAYGVA
0.233	369	30	19	11	0.233	0.367	0.579	36	7	7	0	GGVLGHQVGGG	|.|..|||.||	GAVAAHQVEGG
0.281	169	32	19	11	0.219	0.344	0.579	36	7	9	0	VTADSVLFGLS	:||..|:||||	LTAQQVIFGLS
0.235	377	34	22	11	0.206	0.324	0.5	36	7	8	0	MAISGFHGLDI	:||.|.|.|||	LAIEGIHQLDI
0.205	557	39	12	11	0.179	0.282	0.917	36	7	8	0	GGAVLTGSTLG	||.||||:..|	GGIVLTGTAAG
0.205	557	39	13	11	0.179	0.282	0.846	36	7	8	0	GGAVLTGSTLG	||.||||:..|	GGIVLTGTAAG
0.52	238	25	21	19	0.48	0.76	0.905	63	12	13	0	ALVNQPPIIFADEPTGNLD	|||..||:|..|||..|||	ALVYNPPVILLDEPLSNLD
0.441	576	34	23	19	0.353	0.559	0.826	57	12	15	0	AIAIEPEVLLLDEPTSALD	|:|..|.::|||||.||||	ALAQRPVLMLLDEPFSALD
0.579	173	19	30	16	0.526	0.842	0.533	44	10	11	0	ANVSIPASAASETPVS	|||.||..|:|.||.|	ANVEIPGVASSGTPSS
0.471	118	17	13	8	0.294	0.471	0.615	37	5	8	0	SWLSDEPM	:||||:|:	TWLSDQPL
0.233	575	30	15	8	0.167	0.267	0.533	38	5	7	0	VGHHVQHL	:|||:.||	IGHHLNHL
0.667	80	15	37	13	0.533	0.867	0.351	37	8	10	0	QGQLIKQPFNLEL	|.||.:||.|:||	QQQLAEQPDNVEL
0.588	254	17	15	13	0.471	0.765	0.867	36	8	10	0	LDELVQEAEALLR	:|||.:.||||.|	MDELKEAAEALKR
0.529	553	17	22	13	0.471	0.765	0.591	40	8	9	0	NFYASLPEALAAL	||..||||.:|.|	NFAVSLPEVIAVL
0.556	428	18	23	13	0.444	0.722	0.522	38	8	10	1	EEHAFDYLLKPLD	:||. |.:|||||	QEHG-DIILKPLD
0.556	428	18	24	13	0.444	0.722	0.5	38	8	10	1	EEHAFDYLLKPLD	:||. |.:|||||	QEHG-DIILKPLD
0.556	428	18	24	13	0.444	0.722	0.5	38	8	10	1	EEHAFDYLLKPLD	:||. |.:|||||	QEHG-DIILKPLD
0.556	428	18	25	13	0.444	0.722	0.48	38	8	10	1	EEHAFDYLLKPLD	:||. |.:|||||	QEHG-DIILKPLD
0.474	359	19	22	13	0.421	0.684	0.591	43	8	9	0	GGGGGGSGQGNAG	||..||:|.||.|	GGSFGGAGFGNGG
0.524	19	21	16	13	0.381	0.619	0.812	47	8	11	0	DHLPDLQQLPQLL	||:.|:|.||:||	DHVKDVQDLPELL
0.524	19	21	18	13	0.381	0.619	0.722	47	8	11	0	DHLPDLQQLPQLL	||:.|:|.||:||	DHVKDVQDLPELL
0.524	19	21	19	13	0.381	0.619	0.684	47	8	11	0	DHLPDLQQLPQLL	||:.|:|.||:||	DHVKDVQDLPELL
0.524	19	21	23	13	0.381	0.619	0.565	47	8	11	0	DHLPDLQQLPQLL	||:.|:|.||:||	DHVKDVQDLPELL
0.476	19	21	42	13	0.381	0.619	0.31	40	8	10	0	LDHLPDLQQLPQL	|:.||:||.||.|	LEELPELQNLPFL
0.476	19	21	42	13	0.381	0.619	0.31	40	8	10	0	LDHLPDLQQLPQL	|:.||:||.||.|	LEELPELQNLPFL
0.417	141	24	13	13	0.333	0.542	1	42	8	10	0	LSEWLSQAPLSLE	|:.|||..||||:	LNTWLSDQPLSLK
0.346	392	26	13	13	0.308	0.5	1	37	8	9	0	INPGETPEQAMYR	|..|||||.|:.|	IEQGETPEIALKR
0.37	249	27	16	13	0.296	0.481	0.875	36	8	10	1	GVVKTADN-GSDGK	|:|.|.|| ||.|:	GIVTTTDNGGSTGR
0.393	240	28	14	13	0.286	0.464	0.929	52	8	11	0	IVNGDITQCDLPR	::.||:||.||||	VITGDVTQIDLPR
0.321	307	28	16	13	0.286	0.464	0.812	39	8	9	0	DEGFADDITALSA	|.|||.||..:||	DMGFAQDIETISA
0.321	307	28	18	13	0.286	0.464	0.722	39	8	9	0	DEGFADDITALSA	|.|||.||..:||	DMGFAQDIETISA
0.355	637	31	14	13	0.258	0.419	0.929	37	8	11	0	ISSDTLEQLYSLA	|:|:|||:|..||	ITSETLEKLQDLA
0.355	408	31	25	13	0.258	0.419	0.48	36	8	11	1	SDGRTPLAAVSAD	:||| ||.|::||	NDGR-PLEAIAAD
0.286	540	35	18	13	0.229	0.371	0.722	40	8	10	0	WAELPASLQFALE	||||||:.:..||	WAELPANEKTELE
0.263	209	38	13	13	0.211	0.342	1	42	8	10	0	SQVLLHAPTGAGK	|.:||..|||:||	SNILLIGPTGSGK
0.462	285	26	33	18	0.423	0.692	0.545	36	11	12	0	AAILAGRITLDSAAVAKA	||.|||.:|.||.|.|.|	AAGLAGGLTGDSTADALA
0.5	520	30	25	18	0.367	0.6	0.72	67	11	15	0	DRVDGLDAGADDYLVKPF	|::.||:.|||||:.|||	DKILGLEIGADDYITKPF
0.643	592	14	16	10	0.429	0.714	0.625	40	6	9	0	YLKEIIGHFA	|.:|::||||	YRQELVGHFA
0.643	592	14	18	10	0.429	0.714	0.556	40	6	9	0	YLKEIIGHFA	|.:|::||||	YRQELVGHFA
0.5	4	14	17	10	0.429	0.714	0.588	36	6	7	0	LHVADLASAH	:||.|||..|	IHVVDLADGH
0.467	514	15	21	10	0.4	0.667	0.476	36	6	7	0	IYPSSVTPPR	:.|..|||||	VQPQPVTPPR
0.391	628	23	45	15	0.391	0.652	0.333	42	9	9	0	NTGCQLHLIKPLGFT	|..|.|..|||.|||	NLKCDLLAIKPEGFT
0.542	63	24	31	15	0.375	0.625	0.484	53	9	13	0	KPSILVFDEATSALD	:|.:::|||.|||||	QPQVILFDEPTSALD
0.5	151	16	17	10	0.375	0.625	0.588	36	6	8	0	HGISYIYVTQ	||.|:.||:|	HGTSHFYVSQ
0.5	63	24	34	15	0.375	0.625	0.441	49	9	12	0	KPSILVFDEATSALD	:|.:|:.||.|||||	EPEVLLLDEPTSALD
0.4	461	25	36	15	0.36	0.6	0.389	38	9	10	1	LGSLFNPASPRPLQI	||.|.|||.| ||.:	LGPLINPARP-PLAL
0.5	153	26	34	15	0.346	0.577	0.441	54	9	13	0	PELLMLDEPAAGLNP	||:|:||||.:.|:|	PEVLLLDEPTSALDP
0.423	153	26	26	15	0.346	0.577	0.577	41	9	11	1	PELLM-LDEPAAGLNP	|||:| .|||..|.:|	PELIM*FDEPFVGQDP
0.423	153	26	28	15	0.346	0.577	0.536	51	9	11	0	PELLMLDEPAAGLNP	|||:|.|||..|.:|	PELIMFDEPFVGQDP
0.423	153	26	29	15	0.346	0.577	0.517	41	9	11	1	PELLM-LDEPAAGLNP	|||:| .|||..|.:|	PELIM*FDEPFVGQDP
0.421	85	19	18	10	0.316	0.526	0.556	37	6	8	0	YFMPGLDEAR	|:..|:||||	YYFAGIDEAR
0.263	209	38	29	15	0.237	0.395	0.517	36	9	10	0	AALPVSEVLDELLSA	|.|||.|.|..||:|	AGLPVIENLQNLLNA
0.263	209	38	30	15	0.237	0.395	0.5	36	9	10	0	AALPVSEVLDELLSA	|.|||.|.|..||:|	AGLPVIENLQNLLNA
0.296	605	27	17	10	0.222	0.37	0.588	36	6	8	0	LQTVQHQLAK	:||:.|||.|	VQTIDHQLVK
0.296	605	27	18	10	0.222	0.37	0.556	36	6	8	0	LQTVQHQLAK	:||:.|||.|	VQTIDHQLVK
0.212	381	33	15	10	0.182	0.303	0.667	38	6	7	0	PTVGGGGATG	|.:|||..||	PIIGGGAGTG
0.212	381	33	16	10	0.182	0.303	0.625	38	6	7	0	PTVGGGGATG	|.:|||..||	PIIGGGAGTG
0.48	634	25	19	17	0.4	0.68	0.789	40	10	12	2	LQSLINQQITQVGHGGQ	|||.||.|: .||||:	LQSQINPQL--AGHGGR
0.444	588	27	20	17	0.37	0.63	0.85	52	10	12	0	GALGVIILGQEVHAIFG	||.||::.|..|.||||	GAAGVVVAGSGVQAIFG
0.444	588	27	21	17	0.37	0.63	0.81	52	10	12	0	GALGVIILGQEVHAIFG	||.||::.|..|.||||	GAAGVVVAGSGVQAIFG
0.357	210	28	30	17	0.357	0.607	0.567	44	10	10	0	IPGHEFIGHVVGLGADV	|||.|..|.||...|||	IPGLEVAGEVVATAADV
0.357	210	28	31	17	0.357	0.607	0.548	44	10	10	0	IPGHEFIGHVVGLGADV	|||.|..|.||...|||	IPGLEVAGEVVATAADV
0.75	266	12	18	12	0.583	1	0.667	36	7	9	0	DISDLIVNAFPR	|:..||:|||.|	DVFQLIMNAFAR
0.75	266	12	19	12	0.583	1	0.632	36	7	9	0	DISDLIVNAFPR	|:..||:|||.|	DVFQLIMNAFAR
0.75	266	12	20	12	0.583	1	0.6	36	7	9	0	DISDLIVNAFPR	|:..||:|||.|	DVFQLIMNAFAR
0.583	115	12	15	12	0.583	1	0.8	36	7	7	0	HSPLDAEQYQPK	|.|||.|.|..|	HIPLDIELYDSK
0.583	115	12	25	12	0.583	1	0.48	36	7	7	0	HSPLDAEQYQPK	|.|||.|.|..|	HIPLDIELYDSK
0.714	4	14	26	12	0.5	0.857	0.462	36	7	10	0	PLHVADLASAHA	||:.|:|||.:|	PLYAAELASLYA
0.714	4	14	27	12	0.5	0.857	0.444	36	7	10	0	PLHVADLASAHA	||:.|:|||.:|	PLYAAELASLYA
0.6	442	15	16	12	0.467	0.8	0.75	41	7	9	0	HTVLQVTPHPIM	||:|.|..||:|	HTILIVDDHPLM
0.559	576	34	29	24	0.412	0.706	0.793	64	14	19	1	AIAIEPEVLLLDEPTSALDPISTL	|:..:||:|||||||:.|| |.|:	ALFSDPEILLLDEPTNNLD-IDTI
0.526	418	19	12	12	0.368	0.632	1	41	7	10	0	GQASANKIEKNK	||.:|||::.||	GQGAANKVDGNK
0.526	418	19	18	12	0.368	0.632	0.667	41	7	10	0	GQASANKIEKNK	||.:|||::.||	GQGAANKVDGNK
0.421	85	19	45	12	0.368	0.632	0.267	36	7	8	0	LPYIDYFMPGLD	|.|:||.|..||	LSYLDYVMDKLD
0.381	340	21	43	12	0.333	0.571	0.279	38	7	8	0	FEDAFIDLLGGG	|.|.|.|:.|||	FGDVFGDIFGGG
0.381	340	21	44	12	0.333	0.571	0.273	38	7	8	0	FEDAFIDLLGGG	|.|.|.|:.|||	FGDVFGDIFGGG
0.381	340	21	46	12	0.333	0.571	0.261	38	7	8	0	FEDAFIDLLGGG	|.|.|.|:.|||	FGDVFGDIFGGG
0.381	340	21	47	12	0.333	0.571	0.255	38	7	8	0	FEDAFIDLLGGG	|.|.|.|:.|||	FGDVFGDIFGGG
0.409	59	22	15	12	0.318	0.545	0.8	39	7	9	0	ISPINLPMIPLN	|...|||:||:|	IDATNLPVIPIN
0.409	475	22	19	12	0.318	0.545	0.632	36	7	9	0	LLVEGGNLGLEN	|:..|.|:||||	LITLGENMGLEN
0.409	475	22	20	12	0.318	0.545	0.6	36	7	9	0	LLVEGGNLGLEN	|:..|.|:||||	LITLGENMGLEN
0.409	475	22	21	12	0.318	0.545	0.571	36	7	9	0	LLVEGGNLGLEN	|:..|.|:||||	LITLGENMGLEN
0.435	214	23	21	12	0.304	0.522	0.571	44	7	10	0	KPMVDISGKPFL	||:.||:|||.:	KPLADIAGKPMV
0.435	214	23	22	12	0.304	0.522	0.545	44	7	10	0	KPMVDISGKPFL	||:.||:|||.:	KPLADIAGKPMV
0.435	214	23	31	12	0.304	0.522	0.387	44	7	10	0	KPMVDISGKPFL	||:.||:|||.:	KPLADIAGKPMV
0.348	214	23	17	12	0.304	0.522	0.706	37	7	8	0	GDIPKPMVDISG	|...|||||:.|	GQAGKPMVDVIG
0.348	214	23	18	12	0.304	0.522	0.667	37	7	8	0	GDIPKPMVDISG	|...|||||:.|	GQAGKPMVDVIG
0.375	176	24	18	12	0.292	0.5	0.667	36	7	9	0	VPVEERPPAQAL	:|.||||.|.|:	LPAEERPAAGAV
0.375	84	24	31	12	0.292	0.5	0.387	36	7	9	0	DSAPPLNPAELA	|:.|.:||||.|	DALPVINPAEPA
0.423	153	26	20	12	0.269	0.462	0.6	43	7	11	0	LMLDEPAAGLNP	::||||.||::|	ILLDEPFAGVDP
0.423	153	26	21	12	0.269	0.462	0.571	43	7	11	0	LMLDEPAAGLNP	::||||.||::|	ILLDEPFAGVDP
0.385	153	26	27	12	0.269	0.462	0.444	38	7	10	0	LLMLDEPAAGLN	||:||||.:.|:	LLLLDEPTSALD
0.385	153	26	28	12	0.269	0.462	0.429	38	7	10	0	LLMLDEPAAGLN	||:||||.:.|:	LLLLDEPTSALD
0.346	153	26	31	12	0.269	0.462	0.387	36	7	9	0	LLMLDEPAAGLN	|.:||||..||:	LWLLDEPTEGLD
0.345	490	29	15	12	0.241	0.414	0.8	51	7	10	0	TDYVDLTLIHWP	|||:|:..:|||	TDYLDIYQLHWP
0.345	490	29	16	12	0.241	0.414	0.75	51	7	10	0	TDYVDLTLIHWP	|||:|:..:|||	TDYLDIYQLHWP
0.345	490	29	17	12	0.241	0.414	0.706	51	7	10	0	TDYVDLTLIHWP	|||:|:..:|||	TDYLDIYQLHWP
0.323	352	31	15	12	0.226	0.387	0.8	36	7	10	0	SIDELEIEDLMN	:||..:|:||||	TIDAPQIDDLMN
0.323	352	31	16	12	0.226	0.387	0.75	36	7	10	0	SIDELEIEDLMN	:||..:|:||||	TIDAPQIDDLMN
0.323	352	31	21	12	0.226	0.387	0.571	36	7	10	0	SIDELEIEDLMN	:||..:|:||||	TIDAPQIDDLMN
0.281	635	32	19	12	0.219	0.375	0.632	37	7	9	0	EEIETNELGHGA	|.:.||:|.|||	ETLFTNDLDHGA
0.273	46	33	15	12	0.212	0.364	0.8	36	7	9	0	LAPALIYLLFNG	|.||::..||||	LLPAVLSTLFNG
0.244	109	41	23	12	0.171	0.293	0.522	37	7	10	0	ARGIQLAAKQGF	|:|:|||||..:	AQGVQLAAKLSY
0.52	238	25	29	19	0.44	0.76	0.655	58	11	13	0	ALVNQPPIIFADEPTGNLD	||.:.|.|:..||||.|||	ALFSDPEILLLDEPTNNLD
0.529	576	34	20	19	0.324	0.559	0.95	67	11	18	0	AIAIEPEVLLLDEPTSALD	|:.::|::|:||||||:||	ALILQPQLLILDEPTSSLD
0.529	576	34	31	19	0.324	0.559	0.613	67	11	18	0	AIAIEPEVLLLDEPTSALD	|:.::|::|:||||||:||	ALILQPQLLILDEPTSSLD
0.382	576	34	21	19	0.324	0.559	0.905	54	11	13	0	AIAIEPEVLLLDEPTSALD	|:...|.|:|||||.|.||	ALVYNPPVILLDEPLSNLD
0.382	576	34	28	19	0.324	0.559	0.679	53	11	13	0	AIAIEPEVLLLDEPTSALD	|:..:|.|||.||||..||	AVVNKPAVLLADEPTGNLD
0.667	501	15	35	14	0.533	0.933	0.4	38	8	10	0	QNTLKGGKAMSGLP	:|:|.|.|.|.|||	ENSLGGIKDMGGLP
0.52	238	25	31	21	0.48	0.84	0.677	57	12	13	0	ALVNQPPIIFADEPTGNLDEE	||..||.:|..||||..||.|	ALAMQPQVILFDEPTSALDPE
0.706	279	17	15	14	0.471	0.824	0.933	37	8	12	1	QAGGFAYSM*IPALK	||.||.:|| :||::	QALGFCFSM-VPAIR
0.611	261	18	18	14	0.444	0.778	0.778	38	8	11	0	ALIKIGASGAISGA	|.:..||:|||||:	ASLAAGAAGAISGS
0.45	631	20	21	14	0.4	0.7	0.667	37	8	9	0	SGGTGLGLAIVETA	||.||:.||.|..|	SGNTGVALAFVAAA
0.381	258	21	17	14	0.381	0.667	0.824	39	8	8	0	FDRYDAEMESLLAG	||..|..|..||||	FDAVDVHMSDLLAG
0.364	554	22	17	14	0.364	0.636	0.824	36	8	8	0	DFSSESDTVDPTVI	||....|.||||.|	DFEEGFDGVDPTPI
0.364	554	22	18	14	0.364	0.636	0.778	36	8	8	0	DFSSESDTVDPTVI	||....|.||||.|	DFEEGFDGVDPTPI
0.5	576	34	23	21	0.353	0.618	0.913	63	12	17	0	AIAIEPEVLLLDEPTSALDPI	|:|..|::||:||..|||||:	AMANNPDILLMDEAFSALDPL
0.4	58	25	36	14	0.32	0.56	0.389	38	8	10	0	IEDSEDLIADLDHA	|:...|||||.:||	IQAIADLIADAEHA
0.36	238	25	33	14	0.32	0.56	0.424	37	8	9	0	PIIFADEPTGNLDE	|.:.|||.|.||.|	PQVSADEATANLAE
0.36	238	25	34	14	0.32	0.56	0.412	37	8	9	0	PIIFADEPTGNLDE	|.:.|||.|.||.|	PQVSADEATANLAE
0.36	238	25	35	14	0.32	0.56	0.4	37	8	9	0	PIIFADEPTGNLDE	|.:.|||.|.||.|	PQVSADEATANLAE
0.385	443	26	40	14	0.308	0.538	0.35	36	8	10	0	GAEDIEQTGQQASD	|||:|||....|:|	GAEEIEQAYLTAND
0.346	392	26	18	14	0.308	0.538	0.722	36	8	9	1	QHSWQFPQGGINPG	|| ||.|.|.:|.|	QH-WQNPVGELNIG
0.345	354	29	16	14	0.276	0.483	0.875	41	8	10	0	INMAITGASGQYHK	||.|:|.|.|||.:	INQAVTEAIGQYQQ
0.333	623	30	17	14	0.267	0.467	0.824	37	8	10	0	GGIALSGSTADFST	|||.|:|:.|..||	GGIVLTGTAAGKST
0.323	352	31	29	14	0.258	0.452	0.483	39	8	10	0	DTDLDTDLSIDELE	:|||||:|....||	ETDLDTELQAQFLE
0.29	637	31	20	14	0.258	0.452	0.7	37	8	9	0	EISSDTLEQLYSLA	|:|.|.||..||.|	ELSDDELELFYSAA
0.294	576	34	21	14	0.235	0.412	0.667	43	8	10	0	PEVLLLDEPTSALD	|.::|.||||..||	PSLVLADEPTGNLD
0.265	550	34	26	14	0.235	0.412	0.538	36	8	9	0	KLLGFAGGVITGGE	||...||||:..||	KLDATAGGVVQSGE
0.314	302	35	37	14	0.229	0.4	0.378	39	8	11	0	LENLINTAASSFVY	||||.:.:||.||:	LENLADGSASGFVF
0.286	440	35	19	14	0.229	0.4	0.737	46	8	10	0	GPGVIGLELGQALH	|.|:||||:|...|	GGGIIGLEMGTVYH
0.286	440	35	20	14	0.229	0.4	0.7	46	8	10	0	GPGVIGLELGQALH	|.|:||||:|...|	GGGIIGLEMGTVYH
0.286	440	35	24	14	0.229	0.4	0.583	46	8	10	0	GPGVIGLELGQALH	|.|:||||:|...|	GGGIIGLEMGTVYH
0.647	576	34	31	30	0.5	0.882	0.968	83	17	22	0	AIAIEPEVLLLDEPTSALDPISTLTIEELI	|:.:||:|||.||||:||||..|..|..:|	ALMMEPQVLLFDEPTAALDPEITAQIVSII
0.591	475	22	22	16	0.409	0.727	0.773	38	9	13	1	HHGLQGL-LVEGGNLGL	:.|||.| |::.||:||	NRGLQFLDLIQEGNIGL
0.591	475	22	23	16	0.409	0.727	0.739	38	9	13	1	HHGLQGL-LVEGGNLGL	:.|||.| |::.||:||	NRGLQFLDLIQEGNIGL
0.458	229	24	28	16	0.375	0.667	0.571	49	9	11	0	YHLLPHLSAAHNVEVP	|.||.|||..|:.|:|	YQLLAHLSELHHFELP
0.458	229	24	29	16	0.375	0.667	0.552	49	9	11	0	YHLLPHLSAAHNVEVP	|.||.|||..|:.|:|	YQLLAHLSELHHFELP
0.448	513	29	16	16	0.31	0.552	0.938	36	9	13	1	LPLEGVQFHPESILSE	|||:||..:| |||::	LPLQGVTTNP-SILAK
0.419	574	31	20	16	0.29	0.516	0.8	51	9	13	0	GIFRPELVDQVLDITQ	||..|:|||||:::.|	GIAEPQLVDQVVEVVQ
0.344	635	32	38	16	0.281	0.5	0.421	36	9	11	0	SLLEEFATELGLEEIE	:|.|||.||:..||.|	ALEEEFDTEIPDEEAE
0.344	635	32	39	16	0.281	0.5	0.41	36	9	11	0	SLLEEFATELGLEEIE	:|.|||.||:..||.|	ALEEEFDTEIPDEEAE
0.333	311	33	34	16	0.273	0.485	0.471	38	9	11	0	ALASLHRPVASLADRD	:||:|..||.||.|.|	SLAALALPVGSLEDPD
0.314	440	35	18	16	0.257	0.457	0.889	50	9	11	0	VFGPGVIGLELGQALH	|.|.|:||||:|...|	VMGGGIIGLEMGTVYH
0.314	440	35	23	16	0.257	0.457	0.696	50	9	11	0	VFGPGVIGLELGQALH	|.|.|:||||:|...|	VMGGGIIGLEMGTVYH
0.314	440	35	24	16	0.257	0.457	0.667	40	9	11	1	VFGPGVIGLEL-GQALH	|.|.|:||||: |...|	VMGGGIIGLEM*GTVYH
0.633	369	30	35	25	0.467	0.833	0.714	79	14	19	0	DENKIAGSVLGAVAGGVLGHQVGGG	|:|.:.|::.|||.||.||:.||||	DDNNVVGAIGGAVLGGFLGNAVGGG
0.633	369	30	49	25	0.467	0.833	0.51	79	14	19	0	DENKIAGSVLGAVAGGVLGHQVGGG	|:|.:.|::.|||.||.||:.||||	DDNNVVGAIGGAVLGGFLGNAVGGG
0.5	576	34	27	27	0.441	0.794	1	59	15	17	0	VLLLDEPTSALDPISTLTIEELITTLK	:|||||||||||......|..|:..||	LLLLDEPTSALDMSVQAEILNLLNHLK
0.478	622	23	26	18	0.435	0.783	0.615	39	10	11	2	EEWVGILQGPLPQESGIK	||| |:||....|||.|	EEW--IVQGDFEPESGYK
0.577	153	26	22	18	0.385	0.692	0.818	57	10	15	0	MVTRPELLMLDEPAAGLN	::|.||||::|||.|.|:	LLTAPELLLMDEPLASLD
0.5	516	16	19	9	0.312	0.562	0.474	37	5	8	0	WYGLSDNIS	|||::|.:|	WYGVADPVS
0.5	516	16	20	9	0.312	0.562	0.45	37	5	8	0	WYGLSDNIS	|||::|.:|	WYGVADPVS
0.433	520	30	25	20	0.367	0.667	0.8	51	11	13	0	LDAGADDYLVKPFALAELLA	||||.||.|.||.::..|.|	LDAGMDDVLSKPLSVPALTA
0.571	21	14	13	11	0.429	0.786	0.846	36	6	8	0	FYRPLANGPLK	|.:|:.|.|||	FNKPVTNAPLK
0.438	516	16	14	11	0.375	0.688	0.786	37	6	7	0	GLSDNISQWLK	||..|..|||:	GLGSNYEQWLR
0.471	451	17	22	11	0.353	0.647	0.5	39	6	8	0	GQVGHHIAGGR	|.:||.:.|||	GVLGHQVGGGR
0.471	451	17	30	11	0.353	0.647	0.367	39	6	8	0	GQVGHHIAGGR	|.:||.:.|||	GVLGHQVGGGR
0.476	19	21	29	11	0.286	0.524	0.379	40	6	10	0	LPIGLDHLPDL	||:|::.||:|	LPLGIEQLPEL
0.429	492	21	23	11	0.286	0.524	0.478	36	6	9	0	GLSVVDGFDGS	|:|::.|.|||	GVSLITGIDGS
0.455	390	22	18	11	0.273	0.5	0.611	38	6	10	0	ILSGSITPETV	:|||::.|||:	LLSGAVAPETM
0.409	300	22	25	11	0.273	0.5	0.44	36	6	9	0	RPGALSTNVPS	|||.||.::|:	RPGQLSDDIPA
0.348	248	23	36	11	0.261	0.478	0.306	36	6	8	0	YQWLDAAEAAV	|||.:|..||:	YQWWEAVSAAL
0.348	248	23	37	11	0.261	0.478	0.297	36	6	8	0	YQWLDAAEAAV	|||.:|..||:	YQWWEAVSAAL
0.32	79	25	31	11	0.24	0.44	0.355	41	6	8	0	PTVYGWLEQMG	|.|:.||:|.|	PAVFSWLQQAG
0.32	79	25	32	11	0.24	0.44	0.344	41	6	8	0	PTVYGWLEQMG	|.|:.||:|.|	PAVFSWLQQAG
0.345	513	29	33	11	0.207	0.379	0.333	38	6	10	0	ESILSEQGHQL	|:||.:|||::	ENILKDQGHEV
0.667	369	30	33	26	0.467	0.867	0.788	81	14	20	0	DENKIAGSVLGAVAGGVLGHQVGGGR	:.|.:||::.|||.||.||:.:||||	NNNNVAGAIGGAVVGGFLGNTIGGGR
0.6	188	15	17	13	0.467	0.867	0.765	40	7	9	0	GVSGCDPTPLPEK	|..|.||||:.|:	GFDGVDPTPIFER
0.6	188	15	18	13	0.467	0.867	0.722	40	7	9	0	GVSGCDPTPLPEK	|..|.||||:.|:	GFDGVDPTPIFER
0.688	508	16	31	13	0.438	0.812	0.419	40	7	11	0	IAQLALLPEQLIS	:|:|.|||||.::	VAELGLLPEQQVA
0.588	553	17	20	13	0.412	0.765	0.65	36	7	10	0	NFYASLPEALAAL	:|::.|||||..|	DFFSQLPEALHQL
0.588	553	17	21	13	0.412	0.765	0.619	36	7	10	0	NFYASLPEALAAL	:|::.|||||..|	DFFSQLPEALHQL
0.409	40	22	22	13	0.318	0.591	0.591	36	7	9	0	DFDALFLGVGTYR	||..:|:|||..|	DFVEMFVGVGASR
0.417	229	24	28	13	0.292	0.542	0.464	42	7	10	0	YHLLPHLSAAHNV	::|.|||:|..||	FYLFPHLTALENV
0.36	238	25	25	13	0.28	0.52	0.52	37	7	9	0	IFADEPTGNLDEE	:..||||.:||.|	LLLDEPTNDLDIE
0.423	535	26	18	13	0.269	0.5	0.722	37	7	11	0	VVQTWQQQSAELG	::.:.|||:||||	ILTSGQQQNAELG
0.423	535	26	25	13	0.269	0.5	0.52	37	7	11	0	VVQTWQQQSAELG	::.:.|||:||||	ILTSGQQQNAELG
0.385	161	26	22	13	0.269	0.5	0.591	38	7	10	0	NYSSLLIGVMNVN	|||.|..|:::||	NYSDLYTGLIDVN
0.385	617	26	24	13	0.269	0.5	0.542	38	7	10	0	QLINAFDNSVLYT	|.:|:.||:.|||	QPLNSLDNNSLYT
0.385	617	26	25	13	0.269	0.5	0.52	38	7	10	0	QLINAFDNSVLYT	|.:|:.||:.|||	QPLNSLDNNSLYT
0.385	161	26	27	13	0.269	0.5	0.481	38	7	10	0	NYSSLLIGVMNVN	|||.|..|:::||	NYSDLYTGLIDVN
0.385	161	26	28	13	0.269	0.5	0.464	38	7	10	0	NYSSLLIGVMNVN	|||.|..|:::||	NYSDLYTGLIDVN
0.393	103	28	22	13	0.25	0.464	0.591	39	7	11	0	LPISEVIADNVTA	||:.|::||.|:|	LPLDELVADPVSA
0.393	103	28	35	13	0.25	0.464	0.371	39	7	11	0	LPISEVIADNVTA	||:.|::||.|:|	LPLDELVADPVSA
0.333	425	30	17	13	0.233	0.433	0.765	37	7	10	0	NRPQLLDVLFDDA	|:.||:||:.|.|	NKTQLIDVIADKA
0.333	425	30	18	13	0.233	0.433	0.722	37	7	10	0	NRPQLLDVLFDDA	|:.||:||:.|.|	NKTQLIDVIADKA
0.333	425	30	19	13	0.233	0.433	0.684	37	7	10	0	NRPQLLDVLFDDA	|:.||:||:.|.|	NKTQLIDVIADKA
0.333	425	30	22	13	0.233	0.433	0.591	37	7	10	0	NRPQLLDVLFDDA	|:.||:||:.|.|	NKTQLIDVIADKA
0.267	304	30	36	13	0.233	0.433	0.361	37	7	8	0	ALPTMADYFPRTG	|.||:.||.|..|	APPTLFDYLPADG
0.323	190	31	17	13	0.226	0.419	0.765	39	7	10	0	ELATFAYEHNAVF	||:|:||..|:.|	ELSTYAYVDNSAF
0.312	635	32	21	13	0.219	0.406	0.619	39	7	10	0	LEEIETNELGHGA	:|.:.||:|.|||	IETLFTNDLDHGA
0.312	635	32	28	13	0.219	0.406	0.464	39	7	10	0	LEEIETNELGHGA	:|.:.||:|.|||	IETLFTNDLDHGA
0.194	625	36	28	13	0.194	0.361	0.464	36	7	7	0	FHVFRQFAEGLQQ	||.|....||.||	FHTFNALLEGNQQ
0.231	557	39	14	13	0.179	0.333	0.929	37	7	9	0	AVGGAVLTGSTLG	:.||.||||:..|	SAGGIVLTGTAAG
0.231	557	39	17	13	0.179	0.333	0.765	37	7	9	0	AVGGAVLTGSTLG	:.||.||||:..|	SAGGIVLTGTAAG
0.812	482	16	33	15	0.5	0.938	0.455	40	8	13	0	TLLRIIAGLENQNAG	|||.|:|||::.::|	TLLGILAGLDDGSSG
0.667	462	18	26	15	0.444	0.833	0.615	39	8	12	1	APADIP-LLDAFIAQR	:|:|:| |.|||.|.:	SPSDVPGLYDAFFADQ
0.667	462	18	28	15	0.444	0.833	0.571	39	8	12	1	APADIP-LLDAFIAQR	:|:|:| |.|||.|.:	SPSDVPGLYDAFFADQ
0.667	462	18	31	15	0.444	0.833	0.516	39	8	12	1	APADIP-LLDAFIAQR	:|:|:| |.|||.|.:	SPSDVPGLYDAFFADQ
0.5	23	20	27	15	0.4	0.75	0.556	36	8	10	0	DMGNTQGLDRATEM*A	|:|...||...|:|||	DLGGVDGLLHITDM*A
0.45	272	20	29	15	0.4	0.75	0.517	36	8	9	0	GGQYIETVQALGQSR	||..:....||||||	GGAALPLYDALGQSR
0.476	39	21	15	15	0.381	0.714	1	36	8	10	0	ELGFTPAATFAESGR	:||..|..||||:.|	DLGDFPVMTFAEAMR
0.476	39	21	16	15	0.381	0.714	0.938	36	8	10	0	ELGFTPAATFAESGR	:||..|..||||:.|	DLGDFPVMTFAEAMR
0.476	39	21	17	15	0.381	0.714	0.882	36	8	10	0	ELGFTPAATFAESGR	:||..|..||||:.|	DLGDFPVMTFAEAMR
0.478	561	23	16	15	0.348	0.652	0.938	39	8	11	0	GQTQHEIAEALGVSR	|.||.:|.|.||::|	GLTQGDIGELLGLAR
0.462	153	26	23	15	0.308	0.577	0.652	49	8	12	0	PELLMLDEPAAGLNP	||:|::|||...|:|	PEVLLMDEPFGALDP
0.385	128	26	38	15	0.308	0.577	0.395	36	8	10	0	IGNNDEEEAPLTATS	|..|.||:.|:||.|	IAFNREEDIPVTADS
0.346	162	26	17	15	0.308	0.577	0.941	36	8	9	1	GSETQAGS-PSYDTAY	|....||. |:|||.|	GGPGNAGDIPAYDTVY
0.345	53	29	21	15	0.276	0.517	0.714	38	8	10	0	NLGTHVGDVATHVDA	|||....|:.|:|||	NLGITFNDLHTYVDA
0.367	590	30	32	15	0.267	0.5	0.469	36	8	11	0	GQQLALDSYWPVMGV	||.|||.:..|::||	GQGLALGANLPMIGV
0.387	637	31	23	15	0.258	0.484	0.652	38	8	12	0	IAMLNEISSDTLEQL	||:||.:||.|:.|:	IALLNYLSSVTISQV
0.387	637	31	25	15	0.258	0.484	0.6	38	8	12	0	IAMLNEISSDTLEQL	||:||.:||.|:.|:	IALLNYLSSVTISQV
0.312	581	32	31	15	0.25	0.469	0.484	40	8	10	0	DLSSIVDNEQTSDAL	|||:|.|.|:..|.|	DLSNIADTEEDRDTL
0.364	72	33	27	15	0.242	0.455	0.593	38	8	12	1	GVFLVTQEPM-IIDKM	|::.|||.|: |.||:	GIYFVTQNPLDIPDKI
0.571	339	21	23	17	0.429	0.81	0.739	44	9	12	0	VVSGANEYHEFVLSLVE	||||..:.|.|:|.||:	VVSGGTDNHLFLLDLVD
0.571	339	21	26	17	0.429	0.81	0.654	44	9	12	0	VVSGANEYHEFVLSLVE	||||..:.|.|:|.||:	VVSGGTDNHLFLLDLVD
0.571	339	21	31	17	0.429	0.81	0.548	44	9	12	0	VVSGANEYHEFVLSLVE	||||..:.|.|:|.||:	VVSGGTDNHLFLLDLVD
0.455	632	22	21	17	0.409	0.773	0.81	36	9	10	0	QALVDGSAAKASVLGIK	|||.|...|.|:||..|	QALSDAQQADATVLAAK
0.455	632	22	33	17	0.409	0.773	0.515	36	9	10	0	QALVDGSAAKASVLGIK	|||.|...|.|:||..|	QALSDAQQADATVLAAK
0.48	216	25	28	17	0.36	0.68	0.679	36	9	12	2	GIEGIGFTQTRNT--VNGG	||.|:|..:..:| ||||	GIGGLGLIEENHTALVNGG
0.345	223	29	24	17	0.31	0.586	0.708	37	9	10	0	EQQASLAVEAAFAGLAN	|..||..|:..|.||||	EAAASTDVDDLFGGLAN
0.368	209	38	26	17	0.237	0.447	0.615	37	9	14	1	IAALPVSEVLDELLSAL	:|||.|.|:: ||:||:	VAALSVMEIV-ELISAM
0.368	209	38	31	17	0.237	0.447	0.516	37	9	14	1	IAALPVSEVLDELLSAL	:|||.|.|:: ||:||:	VAALSVMEIV-ELISAM
0.545	544	22	35	19	0.455	0.864	0.543	36	10	12	0	IALPILNPESAILIQLSAV	||...||.||.:.:.||||	IASAALNGESLVPLGLSAV
0.44	238	25	33	19	0.4	0.76	0.576	50	10	11	0	PPIIFADEPTGNLDEENEQ	|||:..||.|..||...||	PPILILDEATSALDTATEQ
0.393	543	28	26	19	0.357	0.679	0.731	42	10	11	0	PGLLATLQQLAVPGALLYV	|.|:.||.|.|.||..|.|	PTLITTLSQAANPGHYLMV
0.441	576	34	20	19	0.294	0.559	0.95	55	10	15	0	LLLDEPTSALDPISTLTIE	:|||||.:.:||||.:.|:	ILLDEPFAGVDPISVIDIK
0.441	576	34	22	19	0.294	0.559	0.864	55	10	15	0	AIAIEPEVLLLDEPTSALD	|:...||:||:|||.::||	ALLTAPELLLMDEPLASLD
0.682	530	22	38	21	0.5	0.955	0.579	38	11	15	1	SSVITELLS-LSCSSELSVTAP	|.|:.|||| |..||::.:.||	SEVLDELLSALQSSSQVLLHAP
0.6	413	20	22	20	0.5	1	0.955	36	10	12	1	IDGVFAI-NDPTAIGADLAAK	|||:..| .|.:..||||..|	IDGLVVIGGDGSYAGADLLTK
0.8	481	15	27	14	0.467	0.933	0.519	38	7	12	0	LIDLPEEYLLWFAR	::||||:.||.|::	VLDLPEDELLSFSQ
0.667	136	15	14	14	0.467	0.933	1	37	7	10	0	ILDVIDIIAPTEVR	:|:..||..||:||	LLETCDIPVPTDVR
0.667	347	15	27	14	0.467	0.933	0.519	36	7	10	0	LGYLVYGYLDTDSR	:.:|.|||||..:|	MAHLHYGYLDYIAR
0.6	64	15	19	14	0.467	0.933	0.737	38	7	9	0	FPNGIHDEVGVILR	||..::||.|..||	FPTELNDETGEFLR
0.6	64	15	20	14	0.467	0.933	0.7	38	7	9	0	FPNGIHDEVGVILR	||..::||.|..||	FPTELNDETGEFLR
0.611	604	18	18	16	0.444	0.889	0.889	36	8	11	0	AIVLLLEEAEEELAGR	|..|:|...:|:||||	ATTLILVTHDEQLAGR
0.583	141	24	26	20	0.417	0.833	0.731	42	10	14	1	LADNLSEWLSQAPLSLEEEQ	|.|||||::... :|:||.|	LLDNLSEYIKPG-MSIEEVQ
0.583	141	24	27	20	0.417	0.833	0.704	42	10	14	1	LADNLSEWLSQAPLSLEEEQ	|.|||||::... :|:||.|	LLDNLSEYIKPG-MSIEEVQ
0.583	141	24	28	20	0.417	0.833	0.679	42	10	14	1	LADNLSEWLSQAPLSLEEEQ	|.|||||::... :|:||.|	LLDNLSEYIKPG-MSIEEVQ
0.583	141	24	29	20	0.417	0.833	0.655	42	10	14	1	LADNLSEWLSQAPLSLEEEQ	|.|||||::... :|:||.|	LLDNLSEYIKPG-MSIEEVQ
0.583	141	24	29	20	0.417	0.833	0.655	42	10	14	1	LADNLSEWLSQAPLSLEEEQ	|.|||||::... :|:||.|	LLDNLSEYIKPG-MSIEEVQ
0.542	141	24	29	20	0.417	0.833	0.655	44	10	13	0	LADNLSEWLSQAPLSLEEEQ	|.|||||::.....|:||.|	LLDNLSEYIKPGM*SIEEVQ
0.542	141	24	30	20	0.417	0.833	0.633	44	10	13	0	LADNLSEWLSQAPLSLEEEQ	|.|||||::.....|:||.|	LLDNLSEYIKPGM*SIEEVQ
0.6	238	25	20	20	0.4	0.8	1	57	10	15	0	ALVNQPPIIFADEPTGNLDE	||:.||.::..||||.:||:	ALILQPQLLILDEPTSSLDK
0.6	238	25	31	20	0.4	0.8	0.645	57	10	15	0	ALVNQPPIIFADEPTGNLDE	||:.||.::..||||.:||:	ALILQPQLLILDEPTSSLDK
0.533	346	15	26	12	0.4	0.8	0.462	37	6	8	0	DNPFDALLPSAM	||||..:||..:	DNPFIVMLPDVL
0.533	346	15	34	12	0.4	0.8	0.353	37	6	8	0	DNPFDALLPSAM	||||..:||..:	DNPFIVMLPDVL
0.516	226	31	29	24	0.387	0.774	0.793	41	12	16	1	DITLDDDLAPGEYRPLTAEEIASV	||.:.|| |...|..||||::|:|	DIAVLDD-AGVPYSLLTAEQLATV
0.625	63	24	31	18	0.375	0.75	0.581	55	9	15	0	ILKKPSILVFDEATSALD	::.:|.:|:|||.|:|||	LMMEPQVLLFDEPTAALD
0.5	475	22	20	16	0.364	0.727	0.8	39	8	11	0	LQGLLVEGGNLGLENA	|..|:|.|||..:|:|	LSDLIVLGGNAAIEDA
0.5	475	22	21	16	0.364	0.727	0.762	39	8	11	0	LQGLLVEGGNLGLENA	|..|:|.|||..:|:|	LSDLIVLGGNAAIEDA
0.5	475	22	21	16	0.364	0.727	0.762	39	8	11	0	LQGLLVEGGNLGLENA	|..|:|.|||..:|:|	LSDLIVLGGNAAIEDA
0.5	475	22	22	16	0.364	0.727	0.727	39	8	11	0	LQGLLVEGGNLGLENA	|..|:|.|||..:|:|	LSDLIVLGGNAAIEDA
0.5	475	22	26	16	0.364	0.727	0.615	39	8	11	0	LQGLLVEGGNLGLENA	|..|:|.|||..:|:|	LSDLIVLGGNAAIEDA
0.48	6	25	18	18	0.36	0.72	0.944	37	9	12	1	NASDHESNTQIDALVGCK	|.||: |.||:.||.|.:	NGSDY-SATQVGALAGAE
0.48	238	25	23	18	0.36	0.72	0.783	52	9	12	0	LVNQPPIIFADEPTGNLD	||::|.:...|||..|||	LVSEPDVFLLDEPLSNLD
0.48	238	25	35	18	0.36	0.72	0.514	52	9	12	0	LVNQPPIIFADEPTGNLD	||::|.:...|||..|||	LVSEPDVFLLDEPLSNLD
0.5	535	26	23	18	0.346	0.692	0.739	36	9	13	1	LPALEQVVQTWQQQSAEL	||| :|.:.|:|||..:|	LPA-DQDIATYQQQIEQL
0.469	400	32	22	22	0.344	0.688	0.955	36	11	15	3	AGI-GIAATNTELNTFDAEALDI	||: ||.|.:|.: ||.|.||:	AGVPGIPANSTLI--FDVELLDV
0.611	338	18	13	12	0.333	0.667	0.923	39	6	11	0	PLFQPVSEVTIR	||::.:::||||	PLYEEIADVTIR
0.611	338	18	15	12	0.333	0.667	0.8	39	6	11	0	PLFQPVSEVTIR	||::.:::||||	PLYEEIADVTIR
0.556	558	18	20	12	0.333	0.667	0.6	38	6	10	0	LDVTDSLLWLEK	||.:.:|||::|	LDTSAALLWMQK
0.481	104	27	20	18	0.333	0.667	0.9	48	9	13	0	LLLDEPSLGLAPIIILQI	:|||||..|:.||.::.|	ILLDEPFAGVDPISVIDI
0.481	104	27	21	18	0.333	0.667	0.857	48	9	13	0	LLLDEPSLGLAPIIILQI	:|||||..|:.||.::.|	ILLDEPFAGVDPISVIDI
0.5	576	34	28	22	0.324	0.647	0.786	63	11	17	0	AIAIEPEVLLLDEPTSALDPIS	|||::||:::.|||....|||:	AIALDPELIMFDEPFVGQDPIT
0.5	576	34	29	22	0.324	0.647	0.759	53	11	17	1	AIAIEPEVLL-LDEPTSALDPIS	|||::||::: .|||....|||:	AIALDPELIM*FDEPFVGQDPIT
0.44	58	25	22	16	0.32	0.64	0.727	39	8	11	0	SVGIEDSEDLIADLDH	|..|:.|:.||:||.|	SAAIDISDGLISDLQH
0.44	58	25	23	16	0.32	0.64	0.696	39	8	11	0	SVGIEDSEDLIADLDH	|..|:.|:.||:||.|	SAAIDISDGLISDLQH
0.36	455	25	23	16	0.32	0.64	0.696	36	8	9	0	PLSGGAASTGGLSAGG	||.|..|:...|||.|	PLPGACAAITALSAAG
0.429	440	35	28	22	0.314	0.629	0.786	62	11	15	0	LPESVAVFGPGVIGLELGQALH	:||.:.|.|.|:||||:|...|	VPERLLVMGGGIIGLEMGTVYH
0.375	400	32	26	20	0.312	0.625	0.769	48	10	12	0	IEGAGIGIAATNTELNTFDA	|||.|||:..|...:|..||	IEGDGIGVDVTPAMINVVDA
0.375	400	32	26	20	0.312	0.625	0.769	48	10	12	0	IEGAGIGIAATNTELNTFDA	|||.|||:..|...:|..||	IEGDGIGVDVTPAMINVVDA
0.375	400	32	28	20	0.312	0.625	0.714	48	10	12	0	IEGAGIGIAATNTELNTFDA	|||.|||:..|...:|..||	IEGDGIGVDVTPAMINVVDA
0.375	400	32	29	20	0.312	0.625	0.69	48	10	12	0	IEGAGIGIAATNTELNTFDA	|||.|||:..|...:|..||	IEGDGIGVDVTPAMINVVDA
0.375	400	32	32	20	0.312	0.625	0.625	48	10	12	0	IEGAGIGIAATNTELNTFDA	|||.|||:..|...:|..||	IEGDGIGVDVTPAMINVVDA
0.375	400	32	34	20	0.312	0.625	0.588	48	10	12	0	IEGAGIGIAATNTELNTFDA	|||.|||:..|...:|..||	IEGDGIGVDVTPAMINVVDA
0.375	400	32	35	20	0.312	0.625	0.571	48	10	12	0	IEGAGIGIAATNTELNTFDA	|||.|||:..|...:|..||	IEGDGIGVDVTPAMINVVDA
0.375	400	32	35	20	0.312	0.625	0.571	38	10	12	1	IEGAGIGIAATNTE-LNTFDA	|||.|||:..|... :|..||	IEGDGIGVDVTPAM*INVVDA
0.375	400	32	36	20	0.312	0.625	0.556	38	10	12	1	IEGAGIGIAATNTE-LNTFDA	|||.|||:..|... :|..||	IEGDGIGVDVTPAM*INVVDA
0.414	434	29	38	18	0.31	0.621	0.447	37	9	12	1	EAIHADALYILGDLFESW	||:..::...||||| ||	EALDPNSPQYLGDLF-SW
0.462	535	26	31	16	0.308	0.615	0.516	47	8	12	0	LPQLTLPALEQVVQTW	||.:::|.||..|:||	LPLISIPELETWVETW
0.385	153	26	32	16	0.308	0.615	0.5	38	8	10	0	TRPELLMLDEPAAGLN	|...|.:||||..||:	TGQTLYILDEPTTGLH
0.385	421	26	34	16	0.308	0.615	0.471	36	8	10	0	SGGDPLHPQNLSAILQ	||.|.:..|.:.||||	SGDDNIDSQKVDAILQ
0.37	387	27	22	16	0.296	0.593	0.773	36	8	10	0	PASIM*SEPQLLQLICA	|..:|..|||.|:|..|	PVMVMIFEPQPLELFAA
0.37	387	27	26	16	0.296	0.593	0.654	36	8	10	0	PASIM*SEPQLLQLICA	|..:|..|||.|:|..|	PVMVMIFEPQPLELFAA
0.471	576	34	21	20	0.294	0.588	0.952	56	10	16	0	LLLDEPTSALDPISTLTIEE	:|||||.:.:||||.:.|::	ILLDEPFAGVDPISVIDIKK
0.417	63	24	19	14	0.292	0.583	0.737	37	7	10	0	VFDEATSALDTHTE	:.|:|.||:|..||	ILDDALSAVDGQTE
0.417	370	24	27	14	0.292	0.583	0.519	37	7	10	0	LLLVGNPDTITPLL	|..|.:||::||.|	LFAVYHPDSVTPAL
0.452	574	31	19	18	0.29	0.581	0.947	52	9	14	0	IPGIFRPELVDQVLDITQ	:.||..|:|||||:::.|	VMGIAEPQLVDQVVEVVQ
0.395	209	38	22	22	0.289	0.579	0.955	38	11	15	1	SEVLDELLSALQSSSQVLLHAP	|.|:.|||| |..||::.:.||	SSVITELLS-LSCSSELSVTAP
0.381	67	21	25	12	0.286	0.571	0.48	40	6	8	0	PCVNGVSAGSWP	|.::|.|.|.||	PDISGASVGYWP
0.375	581	32	22	18	0.281	0.562	0.773	37	9	12	1	DNEQTSDALEDVVMGLII	|| ..|||||..::||.:	DN-SLSDALEQQLLGLTV
0.4	238	25	17	14	0.28	0.56	0.824	38	7	10	0	IIFADEPTGNLDEE	::..||||.:||.|	MLLLDEPTNDLDIE
0.4	238	25	24	14	0.28	0.56	0.583	40	7	10	0	IIFADEPTGNLDEE	::..||||.:||.|	VLLLDEPTNHLDIE
0.4	238	25	24	14	0.28	0.56	0.583	38	7	10	0	IIFADEPTGNLDEE	::..||||.:||.|	MLLLDEPTNDLDIE
0.32	238	25	16	14	0.28	0.56	0.875	38	7	8	0	IIFADEPTGNLDEE	:...|||..|||.|	VFMFDEPLSNLDAE
0.409	40	22	16	12	0.273	0.545	0.75	36	6	9	0	DITMENLLHDFD	||:.||:.|:.|	DISEENIKHELD
0.385	197	26	21	14	0.269	0.538	0.667	36	7	10	0	AAQYLLQQGFDVVY	|.::|.:.|||.||	ALEFLGEAGFDPVY
0.4	497	30	23	16	0.267	0.533	0.652	40	8	12	1	LIWLVEDEPSIADTLI	|.|.| ||||::|.::	LNWFV-DEPSLSDLIL
0.478	280	23	20	12	0.261	0.522	0.6	39	6	11	0	DLINVLSEQYNI	:|:|:|.||:|:	ELLNLLREQFNL
0.478	280	23	22	12	0.261	0.522	0.545	39	6	11	0	DLINVLSEQYNI	:|:|:|.||:|:	ELLNLLREQFNL
0.37	104	27	28	14	0.259	0.519	0.5	38	7	10	0	LLLLDEPSLGLAPI	|::.|||.:|..||	LIMFDEPFVGQDPI
0.37	104	27	35	14	0.259	0.519	0.4	36	7	10	0	APIIILQIFDTIQQ	||:|.:||.|.:.|	APVIAIQIDDDVGQ
0.257	540	35	35	18	0.257	0.514	0.514	36	9	9	0	PILSAENFPAMLTAEQVK	|.|..|....|||.|.||	PSLVVEQILQMLTGEMVK
0.333	557	39	26	20	0.256	0.513	0.769	53	10	13	0	GSTLGTLGGAAIGGVIGHQV	|::|.|.|||..|||.|..:	GNSLATAGGAVAGGVAGQGI
0.333	557	39	27	20	0.256	0.513	0.741	53	10	13	0	GSTLGTLGGAAIGGVIGHQV	|::|.|.|||..|||.|..:	GNSLATAGGAVAGGVAGQGI
0.321	307	28	24	14	0.25	0.5	0.583	36	7	9	0	GFADDITALSATIS	|..||:|.||..:|	GIFDDVTGLSLPLS
0.303	381	33	19	16	0.242	0.485	0.842	44	8	10	0	DAPTVGGGGATGRNGA	|.|..||||.:|:..|	DRPQGGGGGGSGQGNA
0.395	209	38	21	18	0.237	0.474	0.81	39	9	15	1	IAALPVSEVLDELLSALQ	:|||.|.|:: ||:||::	VAALSVMEIV-ELISAME
0.395	209	38	25	18	0.237	0.474	0.68	39	9	15	1	IAALPVSEVLDELLSALQ	:|||.|.|:: ||:||::	VAALSVMEIV-ELISAME
0.395	209	38	27	18	0.237	0.474	0.63	39	9	15	1	IAALPVSEVLDELLSALQ	:|||.|.|:: ||:||::	VAALSVMEIV-ELISAME
0.395	209	38	30	18	0.237	0.474	0.567	39	9	15	1	IAALPVSEVLDELLSALQ	:|||.|.|:: ||:||::	VAALSVMEIV-ELISAME
0.267	425	30	17	14	0.233	0.467	0.824	36	7	8	0	LDVLFDDAVAAENG	:|..|.|.|||..|	IDAAFQDEVAASEG
0.267	425	30	22	14	0.233	0.467	0.636	36	7	8	0	LDVLFDDAVAAENG	:|..|.|.|||..|	IDAAFQDEVAASEG
0.385	535	26	32	12	0.231	0.462	0.375	37	6	10	0	LEQVVQTWQQQS	|..|||:|:::|	LVMVVQSWEEES
0.333	557	39	27	18	0.231	0.462	0.704	39	9	13	1	GTLGGA-AIGGVIGHQVGK	|:.||| ||||.:.:.:.|	GSSGGAVAIGGGLSYPINK
0.308	421	26	16	12	0.231	0.462	0.75	37	6	8	0	DPLHPQNLSAIL	|.:|||.|..:|	DDVHPQTLDVVL
0.308	421	26	18	12	0.231	0.462	0.667	37	6	8	0	DPLHPQNLSAIL	|.:|||.|..:|	DDVHPQTLDVVL
0.314	540	35	33	16	0.229	0.457	0.485	38	8	11	0	SWAELPASLQFALEPI	|.:.||..:||.|:||	SGSYLPDDIQFLLKPI
0.37	474	27	16	12	0.222	0.444	0.75	37	6	10	0	AIVIKPTLVGSL	|::..|||:||:	AVIGNPTLIGSI
0.37	474	27	17	12	0.222	0.444	0.706	37	6	10	0	AIVIKPTLVGSL	|::..|||:||:	AVIGNPTLIGSI
0.344	635	32	19	14	0.219	0.438	0.737	41	7	11	0	LEEFATELGLEEIE	|:.||.:.||:|:|	LQHFAQDAGLQEVE
0.281	169	32	22	14	0.219	0.438	0.636	36	7	9	0	FGLSALAQYIEDPE	||||.|..:..:||	FGLSPLGHFTVNPE
0.281	169	32	23	14	0.219	0.438	0.609	36	7	9	0	FGLSALAQYIEDPE	||||.|..:..:||	FGLSPLGHFTVNPE
0.281	169	32	30	14	0.219	0.438	0.467	36	7	9	0	FGLSALAQYIEDPE	||||.|..:..:||	FGLSPLGHFTVNPE
0.281	169	32	31	14	0.219	0.438	0.452	36	7	9	0	FGLSALAQYIEDPE	||||.|..:..:||	FGLSPLGHFTVNPE
0.281	169	32	36	14	0.219	0.438	0.389	36	7	9	0	FGLSALAQYIEDPE	||||.|..:..:||	FGLSPLGHFTVNPE
0.25	599	32	19	12	0.188	0.375	0.632	38	6	8	0	YLGCCNTGINTR	::.|.|||..||	FIACSNTGSKTR
0.25	210	28	38	10	0.179	0.357	0.263	37	5	7	0	APMIPGHEFI	||.:|||..:	APFVPGHSVV
0.25	210	28	44	10	0.179	0.357	0.227	37	5	7	0	APMIPGHEFI	||.:|||..:	APFVPGHSVV
0.231	557	39	30	14	0.179	0.359	0.467	36	7	9	0	IGAGAGAVGGAVLT	:|||..|:|...||	LGAGHNALGATALT
0.324	576	34	39	12	0.176	0.353	0.308	38	6	11	0	LLDEPTSALDPI	|:|:||::||.:	LIDKPTTSLDEL
0.265	550	34	12	12	0.176	0.353	1	37	6	9	0	LGFAGGVITGGE	:|.||.:|.||:	MGHAGAIIAGGK
0.265	550	34	13	12	0.176	0.353	0.923	37	6	9	0	LGFAGGVITGGE	:|.||.:|.||:	MGHAGAIIAGGK
0.265	550	34	28	12	0.176	0.353	0.429	37	6	9	0	LGFAGGVITGGE	:|.||.:|.||:	MGHAGAIIAGGK
0.3	613	30	22	10	0.167	0.333	0.455	39	5	9	0	IIGIPAGNYG	:|.:|:||:|	VISVPSGNFG
0.63	104	27	34	27	0.481	1	0.794	53	13	17	0	LLLLDEPSLGLAPIIILQIFDTIQQLR	:||||||:..|.||..|.|.:.|..|:	VLLLDEPTSALDPISTLTIEELITTLK
0.64	238	25	31	25	0.48	1	0.806	60	12	16	0	ALVNQPPIIFADEPTGNLDEENEQR	||::..|:...||||..||.|.||:	ALLHSAPLWLLDEPTEGLDAETEQQ
0.359	557	39	30	25	0.308	0.641	0.8	43	12	14	1	GAGAVGGAVLTGSTLGTLGGAAIGG	|:| |||...|.:||....||.|.|	GSG-VGGITETDATLAAASGAIILG
0.56	238	25	31	21	0.4	0.84	0.677	53	10	14	0	ALVNQPPIIFADEPTGNLDEE	||:.:|.::..||||..||.|	ALMMEPQVLLFDEPTAALDPE
0.5	103	28	42	21	0.357	0.75	0.5	42	10	14	0	QQLAEKLPISEVIADNVTASR	|.||:|:|...:||.:.|.||	QYLADKVPDRHLIAPSGTLSR
0.368	209	38	23	21	0.263	0.553	0.913	41	10	14	0	AIAALPVSEVLDELLSALQSS	|:|..||..:|||..|||.::	ALAQRPVLMLLDEPFSALDTA
0.44	238	25	23	19	0.36	0.76	0.826	45	9	11	0	ALVNQPPIIFADEPTGNLD	||...|.::..|||.|.||	ALAVDPEVLLMDEPFGALD
0.519	144	27	21	19	0.333	0.704	1	38	9	14	2	DDELASSM--ALSPELIAQLK	||.:..|: |:.||::|.||	DDVMGESLYNAMLPEIVADLK
0.519	144	27	28	19	0.333	0.704	0.75	38	9	14	2	DDELASSM--ALSPELIAQLK	||.:..|: |:.||::|.||	DDVMGESLYNAMLPEIVADLK
0.444	104	27	31	19	0.333	0.704	0.613	38	9	12	0	LLLLDEPSLGLAPIIILQI	||:||||:..|...:..||	LLILDEPTSSLDKSVQAQI
0.448	53	29	23	19	0.31	0.655	0.783	36	9	13	1	DSLNLGTHVGDVATHVDAN	|:||.|: |||.|...:|:	DALNTGS-VGDEAATTEAD
0.448	53	29	24	19	0.31	0.655	0.75	36	9	13	1	DSLNLGTHVGDVATHVDAN	|:||.|: |||.|...:|:	DALNTGS-VGDEAATTEAD
0.448	53	29	27	19	0.31	0.655	0.667	36	9	13	1	DSLNLGTHVGDVATHVDAN	|:||.|: |||.|...:|:	DALNTGS-VGDEAATTEAD
0.448	53	29	28	19	0.31	0.655	0.643	36	9	13	1	DSLNLGTHVGDVATHVDAN	|:||.|: |||.|...:|:	DALNTGS-VGDEAATTEAD
0.371	440	35	19	19	0.257	0.543	1	44	9	13	0	VAVFGPGVIGLELGQALHR	||:.|.|.:|:.|.|:|.|	VAIIGLGWLGMPLAQSLSR
0.342	209	38	30	19	0.237	0.5	0.633	37	9	13	0	SEVLDELLSALQSSSQVLL	:||||.:|.|.|:.|..:|	AEVLDAILVATQAESGDIL
0.611	343	18	29	17	0.444	0.944	0.586	39	8	11	0	ITSERGRTLASGIKSGA	:..::|.||.|||..||	LLEQQGITLVSGIPGGA
0.55	71	20	21	17	0.4	0.85	0.857	36	8	11	0	VEPTPLTTIDDTQDLM*G	|||..:|.:|..:|.|.|	VEPWNVTLVDTGEDSMTG
0.476	492	21	17	17	0.381	0.81	1	38	8	10	0	GGCLIGLSVVDGFDGSR	||...|.:.:.|.||||	GGTPYGATTIAGGDGSR
0.458	63	24	17	17	0.333	0.708	1	36	8	11	0	ILVFDEATSALDTHTER	:|:.||.|:.||..|.|	MLLLDEPTNDLDIETLR
0.458	370	24	35	17	0.333	0.708	0.486	37	8	11	0	NPDTITPLLANADSLLL	|...:..:||:||.|||	NLSALAAILASADKLLL
0.417	63	24	23	17	0.333	0.708	0.739	38	8	10	0	PSILVFDEATSALDTHT	|.:|:.||...|||..|	PEVLLMDEPFGALDPVT
0.333	141	24	19	17	0.333	0.708	0.895	36	8	8	0	LSEWLSQAPLSLEEEQR	||.||...|..|...||	LSPWLDTLPAQLSAWQR
0.37	564	27	17	17	0.296	0.63	1	38	8	10	0	SVVAGLCEHLEFCDSAK	|:.|||.:|....|.||	SMTAGLAQHFPTTDLAK
0.37	437	27	21	17	0.296	0.63	0.81	36	8	10	0	LRPIVDLTDDDIANFEK	|..:.||.||..|.||:	LENVQDLQDDLAAGFER
0.37	144	27	22	17	0.296	0.63	0.773	36	8	10	0	LDDDELASSMALSPELI	|.||||.|.|...|.::	LPDDELTSLMEQIPGMV
0.321	506	28	29	17	0.286	0.607	0.586	36	8	9	0	LLALANQHADSASNPRP	||.:|.||.|.....||	LLGMAAQHPDMLVGVRP
0.323	637	31	20	17	0.258	0.548	0.85	38	8	10	0	TLEQLYSLAFNQYQSGK	||..:..||:..||.||	TLGNIEPLAYKPYQPGK
0.323	574	31	23	17	0.258	0.548	0.739	38	8	10	0	VDQVLDITQSVAEQTMR	|.|.||||||.....::	VAQALDITQSAVSAALK
0.323	637	31	23	17	0.258	0.548	0.739	38	8	10	0	TLEQLYSLAFNQYQSGK	||..:..||:..||.||	TLGNIEPLAYKPYQPGK
0.344	581	32	18	17	0.25	0.531	0.944	36	8	11	0	EQTSDALEDVVMGLIIN	|.|.|.:|.:..|:|||	EWTGDNVEGMHSGMIIN
0.344	231	32	28	17	0.25	0.531	0.607	39	8	11	0	ETPVTGRRREATAIAQV	:||:||...|:|..|.|	DTPLTGNFAESTQAADV
0.333	20	33	18	17	0.242	0.515	0.944	37	8	11	0	AIGNTAPHPHRARQPVK	||..|||:|..|.:.:|	AIWGTAPNPVPATEAIK
0.278	549	36	26	17	0.222	0.472	0.654	36	8	10	0	PNDVLGVSWGQTVLALS	|.|:|....||||..|:	PGDILTTMSGQTVEVLN
0.333	557	39	33	17	0.205	0.436	0.515	55	8	13	0	GTLGGAAIGGVIGHQVG	|.:|||.:||.:|:.:|	GAIGGAVVGGFLGNTIG
0.688	438	16	23	15	0.438	0.938	0.652	39	7	11	0	GAEQPLAFIIGQDSL	||:|..:|||.|:.:	GAQQDFSFIINQNGM
0.611	145	18	32	15	0.389	0.833	0.469	38	7	11	0	QDLSATPQTPSTAES	||:||.|.:|:..|:	QDISAPPISPTPTEA
0.556	246	18	16	15	0.389	0.833	0.938	36	7	10	0	QPQDPLLAPLFTLIE	||||..:|...||::	QPQDTAIAEQITLLK
0.526	160	19	15	15	0.368	0.789	1	37	7	10	0	TATPADFAEIWPLFQ	||.|.|||.:..:|:	TAPPVDFASLADVFK
0.526	160	19	21	15	0.368	0.789	0.714	37	7	10	0	TATPADFAEIWPLFQ	||.|.|||.:..:|:	TAPPVDFASLADVFK
0.526	160	19	27	15	0.368	0.789	0.556	37	7	10	0	TATPADFAEIWPLFQ	||.|.|||.:..:|:	TAPPVDFASLADVFK
0.526	160	19	28	15	0.368	0.789	0.536	37	7	10	0	TATPADFAEIWPLFQ	||.|.|||.:..:|:	TAPPVDFASLADVFK
0.526	160	19	29	15	0.368	0.789	0.517	37	7	10	0	TATPADFAEIWPLFQ	||.|.|||.:..:|:	TAPPVDFASLADVFK
0.526	160	19	30	15	0.368	0.789	0.5	37	7	10	0	TATPADFAEIWPLFQ	||.|.|||.:..:|:	TAPPVDFASLADVFK
0.526	160	19	31	15	0.368	0.789	0.484	37	7	10	0	TATPADFAEIWPLFQ	||.|.|||.:..:|:	TAPPVDFASLADVFK
0.526	160	19	32	15	0.368	0.789	0.469	37	7	10	0	TATPADFAEIWPLFQ	||.|.|||.:..:|:	TAPPVDFASLADVFK
0.526	160	19	32	15	0.368	0.789	0.469	37	7	10	0	TATPADFAEIWPLFQ	||.|.|||.:..:|:	TAPPVDFASLADVFK
0.526	160	19	33	15	0.368	0.789	0.455	37	7	10	0	TATPADFAEIWPLFQ	||.|.|||.:..:|:	TAPPVDFASLADVFK
0.474	173	19	33	15	0.368	0.789	0.455	36	7	9	0	VSIPASAASETPVST	||:||....|.|:.|	VSLPAETQQELPLHT
0.476	339	21	21	15	0.333	0.714	0.714	36	7	10	0	SGANEYHEFVLSLVE	||..:.|.|:|.||:	SGGTDNHLFLLDLVD
0.522	583	23	15	15	0.304	0.652	1	38	7	12	0	VSGLSDEDFSDLAAY	:|.|:|||..::|:|	LSELADEDIYNIASY
0.522	583	23	18	15	0.304	0.652	0.833	38	7	12	0	VSGLSDEDFSDLAAY	:|.|:|||..::|:|	LSELADEDIYNIASY
0.5	141	24	15	15	0.292	0.625	1	41	7	12	0	EWLSQAPLSLEEEQR	:|::.|||::||..|	QWVALAPLAVEEGLR
0.417	63	24	24	15	0.292	0.625	0.625	36	7	10	0	ILVFDEATSALDTHT	:|:.||.|:.||..|	VLLLDEPTNHLDIET
0.37	605	27	18	15	0.259	0.556	0.833	37	7	10	0	IDQASNVLQTVQHQL	:|:|.|.|.|:|..|	VDEAVNELHTIQDML
0.379	512	29	27	15	0.241	0.517	0.556	37	7	11	0	LAIDGINQAIDNFNE	:|:|.||:|.|..:|	MALDQINEAFDLMHE
0.333	349	30	17	15	0.233	0.5	0.882	38	7	10	0	NDIKGRKLSISDGSP	||::|..|:|..|.|	NDLQGATLAIVPGDP
0.333	349	30	20	15	0.233	0.5	0.75	38	7	10	0	NDIKGRKLSISDGSP	||::|..|:|..|.|	NDLQGATLAIVPGDP
0.355	637	31	20	15	0.226	0.484	0.75	36	7	11	0	IAMLNEISSDTLEQL	:|.|:|:|.|.|.|:	VATLSELSEDALIQI
0.355	637	31	23	15	0.226	0.484	0.652	36	7	11	0	IAMLNEISSDTLEQL	:|.|:|:|.|.|.|:	VATLSELSEDALIQI
0.355	637	31	30	15	0.226	0.484	0.5	36	7	11	0	IAMLNEISSDTLEQL	:|.|:|:|.|.|.|:	VATLSELSEDALIQI
0.355	637	31	33	15	0.226	0.484	0.455	36	7	11	0	IAMLNEISSDTLEQL	:|.|:|:|.|.|.|:	VATLSELSEDALIQI
0.323	352	31	17	15	0.226	0.484	0.882	37	7	10	0	LSIDELEIEDLMNDF	|...||.:||.:|:|	LESGELPLEDALNEF
0.314	302	35	19	15	0.2	0.429	0.789	36	7	11	0	SGNLEGMNVLLRPIS	||:|.||.:|:..:|	SGSLSGMGLLIALVS
0.256	557	39	20	15	0.179	0.385	0.75	37	7	10	0	LGTLGGAAIGGVIGH	:|.|||..:||.|.:	VGVLGGGLMGGGIAN
0.268	109	41	22	15	0.171	0.366	0.727	36	7	11	0	QGFIIEVHRAGM*PLA	||::..:..||:.|||	QGYVQTMSEAGLMPLA
0.529	576	34	33	28	0.382	0.824	0.848	60	13	18	0	PEVLLLDEPTSALDPISTLTIEELITTL	|.:|:|||.|||||..:...|:..:|.|	PPILILDEATSALDTATEQAIQLALTEL
0.55	217	20	34	13	0.3	0.65	0.382	39	6	11	0	DPLHGITLEQLLT	||:..:|:|:|:|	DPISTLTIEELIT
0.429	67	21	19	13	0.286	0.619	0.684	37	6	9	0	VNPCVNGVSAGSW	||..|.|:.:|:|	VNNLVAGIESGAW
0.333	229	24	35	13	0.25	0.542	0.371	37	6	8	0	HLLPHLSAAHNVE	||:||.....|:|	HLMPHFIFVANIE
0.385	274	26	20	13	0.231	0.5	0.65	37	6	10	0	QLDEHYLVITALG	::|..|:|:.|||	EVDSSYVVVAALG
0.429	307	28	16	13	0.214	0.464	0.812	44	6	12	0	TISSILNTGGYFK	::::::|||||.|	SVNTLVNTGGYLK
0.194	157	31	15	13	0.194	0.419	0.867	39	6	6	0	WQWSVHRVNGACH	|.|....||.|.|	WDWQAEPVNEALH
0.324	576	34	20	13	0.176	0.382	0.65	39	6	11	0	DPISTLTIEELIT	||:..:|:|:|:|	DPLHGITLEQLLT
0.278	582	36	19	13	0.167	0.361	0.684	37	6	10	0	FGDSVLPVGAFTF	|..|::|:|.|:|	FTPSIMPLGNFSF
0.205	557	39	14	13	0.154	0.333	0.929	36	6	8	0	GSTLGTLGGAAIG	|..:|..|||.:|	GGKVGLFGGAGVG
0.519	104	27	31	24	0.407	0.889	0.774	47	11	14	0	LLLLDEPSLGLAPIIILQIFDTIQ	:||.|||:..|.|.|..||...|:	VLLFDEPTAALDPEITAQIVSIIR
0.467	520	30	28	24	0.367	0.8	0.857	52	11	14	0	EDRVDGLDAGADDYLVKPFALAEL	|:.:....|||..|:||||..|.|	ENIIAAAQAGASGYVVKPFTAATL
0.583	63	24	28	22	0.417	0.917	0.786	47	10	14	0	ILKKPSILVFDEATSALDTHTE	:|....||:.|:|.||:|..||	LLLDAEILILDDALSAVDGQTE
0.667	565	15	30	11	0.333	0.733	0.367	36	5	10	0	MPNMDGLDLLK	:|:|.|:|:|:	LPDMSGIDVLR
0.381	409	21	15	11	0.238	0.524	0.733	36	5	8	0	SWSTEISPWCE	||||.::.|.:	SWSTLLAQWAD
0.36	295	25	26	11	0.2	0.44	0.423	36	5	9	0	SNSQPIQQIII	:|.||:.||::	ANGQPVHQILV
0.36	295	25	33	11	0.2	0.44	0.333	36	5	9	0	SNSQPIQQIII	:|.||:.||::	ANGQPVHQILV
0.36	295	25	36	11	0.2	0.44	0.306	36	5	9	0	SNSQPIQQIII	:|.||:.||::	ANGQPVHQILV
0.36	295	25	37	11	0.2	0.44	0.297	36	5	9	0	SNSQPIQQIII	:|.||:.||::	ANGQPVHQILV
0.448	54	29	28	20	0.31	0.69	0.714	40	9	13	0	ALIDAGASIFGIKPNASATI	|...||||.:.:||..:||:	AAAQAGASGYVVKPFTAATL
0.448	355	29	36	20	0.31	0.69	0.583	37	9	13	1	ALAQSIPLL-DIEPLQANKLE	|.|.::||| |::..|...||	AFAMTVPLLIDVDSSQQEALE
0.4	590	30	47	20	0.3	0.667	0.404	36	9	12	0	GQQLALDSYWPVMGVEYQAA	|..||..:..||:||..|:|	GM*LAAKTLVPVLGVPVQSA
0.394	20	33	27	20	0.273	0.606	0.704	37	9	13	3	GTSQRSHGSYAIGNTA-PHPH	||.:.:| |.:|..| |||:	GTYETAH--YMLGTAAGPHPY
0.385	557	39	35	20	0.231	0.513	0.571	57	9	15	0	STLGTLGGAAIGGVIGHQVG	:.:|.:|||.:||.:|:.||	NVVGAIGGAVLGGFLGNAVG
0.385	557	39	49	20	0.231	0.513	0.408	57	9	15	0	STLGTLGGAAIGGVIGHQVG	:.:|.:|||.:||.:|:.||	NVVGAIGGAVLGGFLGNAVG
0.593	104	27	32	27	0.444	1	0.844	50	12	16	0	LLLLDEPSLGLAPIIILQIFDTIQQLR	|.:||||:.||....|.|:...:.|||	LYILDEPTTGLHFADIQQLLAVLHQLR
0.545	585	22	21	18	0.364	0.818	0.857	40	8	12	0	GCLNCVPLGSLIAKILKR	|.||.:|:.:.:|.||.|	GTLNVIPIANAMAYILLR
0.583	63	24	20	18	0.333	0.75	0.9	49	8	14	0	ILKKPSILVFDEATSALD	::.:|.:|:.||.||:||	LILQPQLLILDEPTSSLD
0.583	63	24	31	18	0.333	0.75	0.581	49	8	14	0	ILKKPSILVFDEATSALD	::.:|.:|:.||.||:||	LILQPQLLILDEPTSSLD
0.542	63	24	28	18	0.333	0.75	0.643	46	8	13	0	ILKKPSILVFDEATSALD	::.||::|:.||.|..||	VVNKPAVLLADEPTGNLD
0.542	598	24	28	18	0.333	0.75	0.643	36	8	13	0	ETSETRSAPLVTTTKLMI	::|...|||:|.:.||:|	DSSGFLSAPVVASDKLLI
0.5	63	24	24	18	0.333	0.75	0.75	37	8	12	0	SILVFDEATSALDTHTER	::|:.||.|:.||..|.|	NMLLLDEPTNDLDIETLR
0.577	153	26	20	18	0.308	0.692	0.9	51	8	15	0	MVTRPELLMLDEPAAGLN	::.:|:||:||||.:.|:	LILQPQLLILDEPTSSLD
0.577	153	26	31	18	0.308	0.692	0.581	51	8	15	0	MVTRPELLMLDEPAAGLN	::.:|:||:||||.:.|:	LILQPQLLILDEPTSSLD
0.5	153	26	23	18	0.308	0.692	0.783	45	8	13	0	MVTRPELLMLDEPAAGLN	:..||.|::||||.:.|:	LAQRPVLMLLDEPFSALD
0.367	613	30	27	18	0.267	0.6	0.667	39	8	11	0	NAFLGLSEEGRIIGIPAG	|||...:|...|:|:|.|	NAFKPTAERPFILGLPTG
0.367	613	30	28	18	0.267	0.6	0.643	39	8	11	0	NAFLGLSEEGRIIGIPAG	|||...:|...|:|:|.|	NAFKPTAERPFILGLPTG
0.367	613	30	34	18	0.267	0.6	0.529	39	8	11	0	NAFLGLSEEGRIIGIPAG	|||...:|...|:|:|.|	NAFKPTAERPFILGLPTG
0.312	400	32	22	18	0.25	0.562	0.818	39	8	10	0	GAGIGIAATNTELNTFDA	|.|||:..|...:|..||	GDGIGVDVTPAMINVVDA
0.382	576	34	26	18	0.235	0.529	0.692	39	8	13	1	EPEVLL-LDEPTSALDPIS	:||::: .|||....|||:	DPELIM*FDEPFVGQDPIT
0.314	440	35	24	18	0.229	0.514	0.75	37	8	11	0	ESVAVFGPGVIGLELGQA	|:::|.|.|.|||....|	ETISVIGLGYIGLPTAAA
0.314	440	35	29	18	0.229	0.514	0.621	36	8	11	0	VAVFGPGVIGLELGQALH	|||.|.|.|.:|:...|:	VAVVGAGYIAVEIAGVLN
0.282	557	39	22	18	0.205	0.462	0.818	37	8	11	0	TAIGAGAGAVGGAVLTGS	||.||.||.:.|..:.|:	TAAGAVAGGIAGQGVQGA
0.256	557	39	19	18	0.205	0.462	0.947	40	8	10	0	TLGTLGGAAIGGVIGHQV	:|.|..||..||:.|..|	SLATAAGAVAGGIAGQGV
0.256	557	39	24	18	0.205	0.462	0.75	40	8	10	0	TLGTLGGAAIGGVIGHQV	:|.|..||..||:.|..|	SLATAAGAVAGGIAGQGV
0.256	557	39	33	18	0.205	0.462	0.545	40	8	10	0	TLGTLGGAAIGGVIGHQV	:|.|..||..||:.|..|	SLATAAGAVAGGIAGQGV
0.688	335	16	20	16	0.438	1	0.8	41	7	11	0	DGSALLTHLLDADLQR	:|..:.:|.||||:.|	EGELIFSHNLDADIAR
0.722	364	18	26	16	0.389	0.889	0.615	42	7	13	0	GVSNFTPTQFSLLQSR	|.::||||:..|:|::	GYASFTPTEEQLVQAK
0.611	246	18	17	16	0.389	0.889	0.941	37	7	11	0	QPQDPLLAPLFTLIEQ	||||..:|...||:::	QPQDTAIAEQITLLKR
0.5	607	18	17	16	0.389	0.889	0.941	36	7	9	0	IEPEVMTEVLNTSTGR	:.|..:|..|||..||	LTPAAVTGTLNTPVGR
0.478	211	23	20	16	0.304	0.696	0.8	38	7	11	0	DAVVIPIFDNDQDIPV	|.|::|::...|.|||	DQVILPVYAPAQFIPV
0.478	251	23	24	16	0.304	0.696	0.667	36	7	11	0	ELLASFGKPQFAMLLA	|.|:..|:|.::.|||	EALSGDGRPDYSALLA
0.478	251	23	27	16	0.304	0.696	0.593	36	7	11	0	ELLASFGKPQFAMLLA	|.|:..|:|.::.|||	EALSGDGRPDYSALLA
0.5	229	24	19	16	0.292	0.667	0.842	39	7	12	0	LLPHLSAAHNVEVPAV	|:|.|:...||::||:	LVPTLNTLENVQLPAL
0.417	441	24	35	16	0.292	0.667	0.457	37	7	10	0	ITGDHPQGYSNDLTLF	:.|:.|||..|:|..|	LMGEDPQGIPNNLMPF
0.375	598	24	27	16	0.292	0.667	0.593	37	7	9	0	TSETRSAPLVTTTKLM	|.|.:.|||.|...|:	TEEDKGAPLATAVSLL
0.37	144	27	28	16	0.259	0.593	0.571	36	7	10	0	DLDDDELASSMALSPE	:|:||.|..:..|.||	ELEDDMLDKAWGLEPE
0.379	512	29	23	16	0.241	0.552	0.696	37	7	11	0	LAIDGINQAIDNFNEV	:|||.||::.|...|:	IAIDDINESYDTLAEL
0.379	512	29	25	16	0.241	0.552	0.64	37	7	11	0	LAIDGINQAIDNFNEV	:|||.||::.|...|:	IAIDDINESYDTLAEL
0.345	512	29	34	16	0.241	0.552	0.471	36	7	10	0	NQAIDNFNEVQTFTTI	|.|:|.:.||.|.|.:	NAALDMYKEVNTGTNL
0.333	520	30	31	16	0.233	0.533	0.516	36	7	10	0	DGLDAGADDYLVKPFA	||:|..:.|..||.:|	DGMDTSSMDNYVKQYA
0.387	352	31	28	16	0.226	0.516	0.571	41	7	12	0	PDTDLDTDLSIDELEI	||:.::.|:|..|:||	PDSQINKDMSTGEVEI
0.344	581	32	18	16	0.219	0.5	0.889	36	7	11	0	SIVDNEQTSDALEDVV	::.|..|.::||||.|	NVTDKIQLANALEDAV
0.344	581	32	27	16	0.219	0.5	0.593	36	7	11	0	SIVDNEQTSDALEDVV	::.|..|.::||||.|	NVTDKIQLANALEDAV
0.316	209	38	16	16	0.184	0.421	1	36	7	12	0	ALPVSEVLDELLSALQ	:|...|.||:||:|::	SLQYGEALDDLLAAIK
0.316	209	38	18	16	0.184	0.421	0.889	36	7	12	0	ALPVSEVLDELLSALQ	:|...|.||:||:|::	SLQYGEALDDLLAAIK
0.542	63	24	29	23	0.417	0.958	0.793	46	10	13	0	ILKKPSILVFDEATSALDTHTER	:...|.||:.||.|:.||..|.|	LFSDPEILLLDEPTNNLDIDTIR
0.542	229	24	38	21	0.375	0.875	0.553	50	9	13	0	YHLLPHLSAAHNVEVPAVYAG	:||||..:|..||.:|.:..|	HHLLPDFTALENVAMPLLIGG
0.429	391	28	26	21	0.321	0.75	0.808	36	9	12	0	PECHVTCIDDFITADNVAELL	||.:|..:||...|..:||.|	PETNVADLDDMDKAVAIAESL
0.429	391	28	29	21	0.321	0.75	0.724	36	9	12	0	PECHVTCIDDFITADNVAELL	||.:|..:||...|..:||.|	PETNVADLDDMDKAVAIAESL
0.421	209	38	34	28	0.316	0.737	0.824	42	12	16	0	VSEVLDELLSALQSSSQVLLHAPTGAGK	:.||.:||..|.|..:.||:....||||	MGEVNNELNLAAQPPAVVLMAGLQGAGK
0.421	209	38	37	28	0.316	0.737	0.757	42	12	16	0	VSEVLDELLSALQSSSQVLLHAPTGAGK	:.||.:||..|.|..:.||:....||||	MGEVNNELNLAAQPPAVVLMAGLQGAGK
0.433	520	30	40	21	0.3	0.7	0.525	43	9	13	0	DALEDRVDGLDAGADDYLVKP	:||::....|..|||..:|||	EALQEIAQDLQEGADMVMVKP
0.419	68	31	23	21	0.29	0.677	0.913	36	9	13	0	MAILLVEQFYDFAAELADNYL	:||..:.:.||..|||.|:.|	IAIDDINESYDTLAELIDSQL
0.419	68	31	25	21	0.29	0.677	0.84	36	9	13	0	MAILLVEQFYDFAAELADNYL	:||..:.:.||..|||.|:.|	IAIDDINESYDTLAELIDSQL
0.545	345	22	34	14	0.273	0.636	0.412	38	6	12	0	DLSAEPTSVILLGG	:|:|:|.:|:|:.|	NLAAQPPAVVLMAG
0.545	345	22	37	14	0.273	0.636	0.378	38	6	12	0	DLSAEPTSVILLGG	:|:|:|.:|:|:.|	NLAAQPPAVVLMAG
0.36	61	25	23	14	0.24	0.56	0.609	38	6	9	0	HADYGSVDKIPIHL	|::|...|..|:||	HSEYNGRDDQPLHL
0.423	153	26	26	14	0.231	0.538	0.538	36	6	11	0	LLMLDEPAAGLNPK	:.:||||:.||:.:	MYVLDEPSIGLHQR
0.333	623	30	20	14	0.2	0.467	0.7	37	6	10	0	IALSGSTADFSTED	:.|.|.|:||:.:|	LGLPGDTSDFTLDD
0.323	157	31	15	14	0.194	0.452	0.933	37	6	10	0	NGACHVWNELVCSV	||:.|:.|||:..:	NGSTHMVNELIAGL
0.323	157	31	16	14	0.194	0.452	0.875	37	6	10	0	NGACHVWNELVCSV	||:.|:.|||:..:	NGSTHMVNELIAGL
0.323	226	31	18	14	0.194	0.452	0.778	37	6	10	0	GEYRPLTAEEIASV	||:.||.::|:..|	GEHNPLKSDEVEEV
0.545	475	22	22	19	0.364	0.864	0.864	37	8	12	0	GLQGLLVEGGNLGLENAEL	|:.||:|.||:.....|:|	GIDGLVVIGGDGSYAGADL
0.583	63	24	23	19	0.333	0.792	0.826	45	8	14	0	ILKKPSILVFDEATSALDT	:.::|.:::.||..|||||	LAQRPVLMLLDEPFSALDT
0.48	238	25	22	19	0.32	0.76	0.864	45	8	12	0	ALVNQPPIIFADEPTGNLD	||:..|.::..|||..:||	ALLTAPELLLMDEPLASLD
0.48	238	25	34	19	0.32	0.76	0.559	46	8	12	0	ALVNQPPIIFADEPTGNLD	|:..:|.::..||||..||	AIAIEPEVLLLDEPTSALD
0.44	238	25	23	19	0.32	0.76	0.826	40	8	11	0	ALVNQPPIIFADEPTGNLD	||..:|.::..|||...||	ALAQRPVLMLLDEPFSALD
0.44	216	25	37	19	0.32	0.76	0.514	42	8	11	0	GIEGIGFTQTRNTVNGGFS	|.:|...|||:....|||:	GFDGPATTQTQPATQGGFT
0.44	216	25	38	19	0.32	0.76	0.5	42	8	11	0	GIEGIGFTQTRNTVNGGFS	|.:|...|||:....|||:	GFDGPATTQTQPATQGGFT
0.44	216	25	39	19	0.32	0.76	0.487	42	8	11	0	GIEGIGFTQTRNTVNGGFS	|.:|...|||:....|||:	GFDGPATTQTQPATQGGFT
0.4	238	25	23	19	0.32	0.76	0.826	39	8	10	0	ALVNQPPIIFADEPTGNLD	|:.|.|.|:..||....||	AMANNPDILLMDEAFSALD
0.367	520	30	24	19	0.267	0.633	0.792	37	8	11	0	ALEDRVDGLDAGADDYLVK	||.|::|.:|....|.|.|	ALRDQIDEVDKALLDLLAK
0.441	576	34	28	19	0.235	0.559	0.679	47	8	15	0	AIAIEPEVLLLDEPTSALD	|:.::.|:|:||:..||:|	ALLLDAEILILDDALSAVD
0.353	576	34	25	19	0.235	0.559	0.76	46	8	12	0	AIAIEPEVLLLDEPTSALD	|:..:|.::..||||..||	ALVNQPPIIFADEPTGNLD
0.625	441	24	33	24	0.417	1	0.697	40	10	15	1	STLLSLITGDHPQGYSNDLTLFGR	||||.::.| ...|.|.|::|.|:	STLLGILAG-LDDGSSGDVSLLGQ
0.367	349	30	37	24	0.333	0.8	0.649	44	10	11	0	QDAYVGWNDIKGRKLSISDGSPDP	||.|.|.|...|...|:..|.|.|	QDPYHGPNQAHGLSFSVLPGVPAP
0.429	302	35	32	24	0.286	0.686	0.719	37	10	15	1	QSGNLEGMNVLLRPISADVLENLI	||.|.| :|.|..|:||.|.:.::	QSANDE-LNTLESPVSAPVAQVVV
0.395	209	38	25	24	0.263	0.632	0.92	40	10	15	1	ALPVSEVLDELLSALQSSSQVLLH	:|...|.||:||:|:: ..|..||	SLQYGEALDDLLAAIK-DKQTELH
0.333	72	33	15	12	0.152	0.364	0.8	37	5	11	0	PMIIDKMTTAEN	|:::|:|.::||	PLLLDEMLSSEN
0.297	14	37	14	12	0.135	0.324	0.857	38	5	11	0	VISYGLSIDGKG	|:::|.::||:|	VLTHGFTVDGQG
0.545	122	22	35	17	0.318	0.773	0.486	38	7	12	0	NLGASVSALTLEHYPGM	:||::||.|.|.|:..:	SLGSAVSDLPLSHFDAL
0.522	561	23	18	17	0.304	0.739	0.944	36	7	12	0	YYVAGQTQHEIAEALGV	:.:.|:|..|||:.||:	HVLEGKTDAEIAQLLGL
0.435	179	23	33	17	0.304	0.739	0.515	39	7	10	0	WIPRASLSASTSEGLPM	|:...||.|.|.:.||:	WLSLVSLPAETQQELPL
0.444	249	27	33	17	0.259	0.63	0.515	39	7	12	0	GVVKTADNGSDGKMSLI	|::...|:||.|.:||:	GILAGLDDGSSGDVSLL
0.444	144	27	36	17	0.259	0.63	0.472	41	7	12	0	RPDLDDDELASSMALSP	|||.::|:.|.:..:||	RPDFNNDDYAIACCVSP
0.379	355	29	24	17	0.241	0.586	0.708	38	7	11	0	LAQSIPLLDIEPLQANK	|:|.:..||:.|:.|.|	LSQQMNFLDVVPISAEK
0.379	355	29	25	17	0.241	0.586	0.68	38	7	11	0	LAQSIPLLDIEPLQANK	|:|.:..||:.|:.|.|	LSQQMNFLDVVPISAEK
0.333	304	30	24	17	0.233	0.567	0.708	37	7	10	0	MGRSYVALPTMADYFPR	:|..|:.|||.|.:..|	IGLGYIGLPTAAAFASR
0.438	414	32	21	17	0.219	0.531	0.762	37	7	14	0	IAIGITLIIGTLM*TPIL	:::||..:.|.:||||::	LSLGIETM*GGVM*TPLI
0.438	414	32	22	17	0.219	0.531	0.727	37	7	14	0	IAIGITLIIGTLM*TPIL	:::||..:.|.:||||::	LSLGIETM*GGVM*TPLI
0.438	414	32	24	17	0.219	0.531	0.667	37	7	14	0	IAIGITLIIGTLM*TPIL	:::||..:.|.:||||::	LSLGIETM*GGVM*TPLI
0.438	414	32	25	17	0.219	0.531	0.64	37	7	14	0	IAIGITLIIGTLM*TPIL	:::||..:.|.:||||::	LSLGIETM*GGVM*TPLI
0.438	414	32	29	17	0.219	0.531	0.552	37	7	14	0	IAIGITLIIGTLM*TPIL	:::||..:.|.:||||::	LSLGIETM*GGVM*TPLI
0.44	58	25	26	22	0.36	0.88	0.846	36	9	11	0	GIEDSEDLIADLDHAFQLAVTR	||.:...|:||||.|......|	GIFNDTTLLADLDDALPEGTNR
0.615	153	26	29	22	0.346	0.846	0.759	52	9	16	0	IARCMVTRPELLMLDEPAAGLN	:|:.:.:.||:|:||||...|:	LAQALFSDPEILLLDEPTNNLD
0.615	153	26	35	22	0.346	0.846	0.629	54	9	16	0	IARCMVTRPELLMLDEPAAGLN	|.|.:|:.|::.:||||.:.|:	IGRTLVSEPDVFLLDEPLSNLD
0.688	482	16	23	15	0.375	0.938	0.652	36	6	11	0	TLLRIIAGLENQNAG	|||.::.||::..:|	TLLHLLGGLDSPTSG
0.577	153	26	31	20	0.308	0.769	0.645	53	8	15	0	MVTRPELLMLDEPAAGLNPK	::..|::|:.|||.|.|:|:	LMMEPQVLLFDEPTAALDPE
0.538	153	26	21	20	0.308	0.769	0.952	46	8	14	0	MVTRPELLMLDEPAAGLNPK	:|..|.:::||||.:.|:.|	LVYNPPVILLDEPLSNLDAK
0.462	162	26	33	20	0.308	0.769	0.606	37	8	12	0	DPLGSETQAGSPSYDTAYAD	|..||:||:|..::.|...|	DLSGSQTQSGDLTFTTEGGD
0.379	354	29	31	20	0.276	0.69	0.645	37	8	11	0	MAPPQALAINMAITGASGQY	:|.|.|:|.|...|...||:	VAAPSAIADNAVPTSQGGQH
0.333	369	30	43	20	0.267	0.667	0.465	36	8	10	0	GSVLGAVAGGVLGHQVGGGR	|:....:.|.|.|...||||	GADFSDIFGDVFGDIFGGGR
0.333	369	30	44	20	0.267	0.667	0.455	36	8	10	0	GSVLGAVAGGVLGHQVGGGR	|:....:.|.|.|...||||	GADFSDIFGDVFGDIFGGGR
0.333	369	30	46	20	0.267	0.667	0.435	36	8	10	0	GSVLGAVAGGVLGHQVGGGR	|:....:.|.|.|...||||	GADFSDIFGDVFGDIFGGGR
0.333	369	30	47	20	0.267	0.667	0.426	36	8	10	0	GSVLGAVAGGVLGHQVGGGR	|:....:.|.|.|...||||	GADFSDIFGDVFGDIFGGGR
0.308	557	39	33	25	0.256	0.641	0.758	36	10	12	0	GAVLTGSTLGTLGGAAIGGVIGHQV	|.|:..:....||...||.|.||.|	GMVVPSTLFEELGFNYIGPVDGHDV
0.458	229	24	21	15	0.25	0.625	0.714	36	6	11	0	HLLPHLSAAHNVEVP	||||.::|..::.:|	HLLPTIAACSSLPLP
0.44	385	25	30	15	0.24	0.6	0.5	38	6	11	0	TDSNVMATSVPNPLL	|:.:::|...||||:	TEPSIIAAEPPNPLV
0.44	385	25	31	15	0.24	0.6	0.484	38	6	11	0	TDSNVMATSVPNPLL	|:.:::|...||||:	TEPSIIAAEPPNPLV
0.343	302	35	32	20	0.229	0.571	0.625	36	8	12	0	LRPISADVLENLINTAASSF	|..||:|.||.|.:.|.:.:	LNEISSDTLEQLYSLAFNQY
0.306	549	36	22	20	0.222	0.556	0.864	36	8	11	1	DVLGVSWGQTVLALSHAITR	|.:| |||..:|..:|...|	DYVG-SWGPMILGHNHPAIR
0.333	590	30	36	15	0.2	0.5	0.417	36	6	10	0	VEYQAAPVDLNTLFG	:||..||.|:.::.|	IEYLPAPTDVESING
0.333	590	30	38	15	0.2	0.5	0.395	36	6	10	0	VEYQAAPVDLNTLFG	:||..||.|:.::.|	IEYLPAPTDVESING
0.355	157	31	16	15	0.194	0.484	0.938	38	6	11	0	VNGACHVWNELVCSV	:||:.|:.|||:..:	LNGSTHMVNELIAGL
0.355	157	31	17	15	0.194	0.484	0.882	38	6	11	0	VNGACHVWNELVCSV	:||:.|:.|||:..:	LNGSTHMVNELIAGL
0.5	141	24	41	23	0.375	0.958	0.561	38	9	12	0	MLDLADNLSEWLSQAPLSLEEEQ	||||.:..|.|:....|:...||	MLDLVEEGSNWVEIEQLAQAVEQ
0.481	437	27	24	23	0.333	0.852	0.958	40	9	13	0	IENLSATLNALRPIVDLTDDDIA	::.||..:||:|..|....||.|	VDQLSNDVNAVRADVQAAKDDAA
0.438	400	32	35	23	0.281	0.719	0.657	38	9	14	0	TINIEGAGIGIAATNTELNTFDA	||.:..|.:|.|.::..|:.|||	TIALGTASLGSAVSDLPLSHFDA
0.667	283	18	31	18	0.389	1	0.548	37	7	12	0	EQGVFNIFFTGDSALIGR	:.||.::.|:.||..:||	DMGVISM*FSSDSQAMGR
0.5	63	24	22	18	0.292	0.75	0.818	39	7	12	0	ILKKPSILVFDEATSALD	:|..|.:|:.||..::||	LLTAPELLLMDEPLASLD
0.44	238	25	39	18	0.28	0.72	0.462	36	7	11	0	VNQPPIIFADEPTGNLDE	:.|..:...|:||.:|||	IAQAVLALIDKPTTSLDE
0.538	153	26	23	18	0.269	0.692	0.783	46	7	14	0	MVTRPELLMLDEPAAGLN	:|:.|::.:||||.:.|:	LVSEPDVFLLDEPLSNLD
0.462	535	26	18	18	0.269	0.692	1	36	7	12	0	LPQLTLPALEQVVQTWQQ	|||||:..::.:.|..|:	LPQLTIVVVDTIPQELQR
0.462	153	26	28	18	0.269	0.692	0.643	42	7	12	0	MVTRPELLMLDEPAAGLN	:|.:|.:|:.|||...|:	VVNKPAVLLADEPTGNLD
0.423	617	26	44	18	0.269	0.692	0.409	36	7	11	0	QLINAFDNSVLYTDSFIA	|::|...||:|..|..:|	QILNTLINSILLLDDDLA
0.387	276	31	37	18	0.226	0.581	0.486	37	7	12	0	DVSPDTPVALISAGVGQT	:|:.|.||.:::|..|.|	EVAGDQPVTILTATSGDT
0.344	314	32	35	18	0.219	0.562	0.514	38	7	11	0	LADEPGYVQIHPEDASYL	|||:|.:..|.||...::	LADKPTFADITPEFLDFI
0.353	576	34	25	18	0.206	0.529	0.68	37	7	12	1	IEPEVLLLDEPTSALDPI	:.|:..::.|||| |.|:	LRPDFAIIGEPTS-LQPV
0.257	440	35	30	18	0.2	0.514	0.6	37	7	9	0	DDVFNWDDLPESVAVFGP	:|:.||.|....||...|	EDIINWTDGAALVATGSP
0.484	352	31	34	26	0.323	0.839	0.765	42	10	15	0	SLTPDTDLDTDLSIDELEIEDLMNDF	||:....:.|.|...||.:||.:|:|	SLSELEQIVTRLESGELPLEDALNEF
0.469	169	32	28	26	0.312	0.812	0.964	38	10	15	1	EDIPVTADSVL-FGLSALAQYIEDPEE	|.....||:|: :..|...:|||.||:	ESFQAVADAVVDYHQSGPVEYIEFPEK
0.438	635	32	36	26	0.312	0.812	0.722	41	10	14	0	YSSLLEEFATELGLEEIETNELGHGA	||:||:...|.||:.......|.||:	YSALLKPGDTVLGMNLAHGGHLTHGS
0.406	635	32	31	26	0.312	0.812	0.806	39	10	13	1	SLLEEFATELGLEEIETNELGHGAVT	||.|.||... ..|::...|.||.|:	SLAESFAANF-TAELDNANLSHGEVS
0.282	557	39	35	26	0.256	0.667	0.743	38	10	11	0	AVGGAVLTGSTLGTLGGAAIGGVIGH	|||.|.|.....||:.|...|....|	AVGWAALDYVKPGTIVGVGTGSTAAH
0.282	557	39	36	26	0.256	0.667	0.722	38	10	11	0	AVGGAVLTGSTLGTLGGAAIGGVIGH	|||.|.|.....||:.|...|....|	AVGWAALDYVKPGTIVGVGTGSTAAH
0.348	404	23	31	13	0.217	0.565	0.419	39	5	8	0	WPWRIKVSWMKQS	|.|....||::|:	WQWPAVFSWLQQA
0.348	404	23	32	13	0.217	0.565	0.406	39	5	8	0	WPWRIKVSWMKQS	|.|....||::|:	WQWPAVFSWLQQA
0.458	96	24	31	13	0.208	0.542	0.419	36	5	11	0	ETQLEQPVEQSTL	|.::.||:|::|:	EAEMAQPLEEATI
0.458	96	24	33	13	0.208	0.542	0.394	36	5	11	0	ETQLEQPVEQSTL	|.::.||:|::|:	EAEMAQPLEEATI
0.419	637	31	36	21	0.258	0.677	0.583	38	8	13	0	MLNEISSDTLEQLYSLAFNQY	:|..||:|.||.|.:.|.:.:	LLRPISADVLENLINTAASSF
0.469	414	32	30	21	0.25	0.656	0.7	38	8	15	1	GIGIAIGITLIIGTLM*TPILQ	|...|:|::|::|.:| ..:||	GPAAAMGLSLVVGIVM-AEVLQ
0.531	412	32	35	29	0.344	0.906	0.8	44	11	17	1	IGGETLEPMYNSIVQQLIYLHNVITGEEK	||.|.|.|:...::.||:. |.:||.:.|	IGDEVLSPVMFPVLHQLLG-HTLITTDGK
0.6	238	25	25	24	0.36	0.96	0.96	44	9	15	0	ALVNQPPIIFADEPTGNLDEENEQ	||.|||.::...:|..:|..||::	ALENQPNLMIFQQPVEDLIVENDR
0.6	238	25	36	24	0.36	0.96	0.667	44	9	15	0	ALVNQPPIIFADEPTGNLDEENEQ	||.|||.::...:|..:|..||::	ALENQPNLMIFQQPVEDLIVENDR
0.647	312	17	22	16	0.353	0.941	0.727	37	6	11	0	QSLTVPSEVNEVPGSR	|...:|..::|:||:|	QEALLPVAISEMPGNR
0.429	235	28	29	24	0.321	0.857	0.828	36	9	12	0	MTYTGLNAQTRPDPQIGLNSQAGP	:|.||:....||..:.||.|...|	VTITGMGMVMRPITEPGLYSSGIP
0.5	497	30	25	24	0.3	0.8	0.96	37	9	15	0	LVEDEPSIADTLIYTLESEGFTLR	||:|||:.::.....|.::|.|.|	LVDDEPTESELADDELLAQGVTQR
0.368	209	38	28	24	0.237	0.632	0.857	36	9	14	0	IAALPVSEVLDELLSALQSSSQVL	:||.|:..:..||:.||:.|...|	LAAQPIPVLDGELVGALRPSGTAL
0.31	512	29	24	16	0.207	0.552	0.667	36	6	9	0	DGINQAIDNFNEVQTF	||.|:.|:....:|.|	DGFNEVINGMGVIQQF
0.367	497	30	20	16	0.2	0.533	0.8	36	6	11	0	EPSIADTLIYTLESEG	:|.|.:||:..:.:||	DPLIVETLLEVMNTEG
0.387	157	31	17	16	0.194	0.516	0.941	40	6	12	0	RVNGACHVWNELVCSV	::||:.|:.|||:..:	KLNGSTHMVNELIAGL
0.355	276	31	17	16	0.194	0.516	0.941	37	6	11	0	DTPVALISAGVGQTPM	|.|.|:::||:...|:	DVPSAVVTAGITPLPI
0.323	329	31	22	16	0.194	0.516	0.727	36	6	10	0	EMRAYHGFDAAGIVAR	|:..:||.|.||:..:	EIGTFHGGDLAGLTEK
0.593	104	27	27	27	0.37	1	1	44	10	16	0	LLLLDEPSLGLAPIIILQIFDTIQQLR	|||||||:..|...:..:|.:.:..|:	LLLLDEPTSALDMSVQAEILNLLNHLK
0.556	437	27	27	27	0.37	1	0.963	38	10	15	1	IENLSATLNALRPIVDLTDDDIANFEK	|:|.|.|| .|||::....:.|.|..:	IDNASDTL-ILRPLISHDKEHIINLAR
0.474	209	38	40	27	0.263	0.711	0.675	37	10	18	1	SEVLDELLSA-LQSSSQVLLHAPTGAGK	:||:.::.:| |..:..|:|.|.|.||:	AEVM*DVANAVLDGTDAVMLSAETAAGQ
0.421	209	38	38	27	0.263	0.711	0.711	45	10	16	0	SEVLDELLSALQSSSQVLLHAPTGAGK	:||:|...:.|..:..|:|.|.|.||:	AEVMDVANAVLDGTDAVMLSAETAAGQ
0.522	280	23	21	19	0.304	0.826	0.905	36	7	12	0	LDTTIDLINVLSEQYNIDK	:|..||..|:.:..:||:|	IDQLIDYSNLTNGYFNINK
0.542	63	24	21	19	0.292	0.792	0.905	40	7	13	0	TILKKPSILVFDEATSALD	:::..||:::.||.|..||	SLVNNPSLVLADEPTGNLD
0.5	63	24	23	19	0.292	0.792	0.826	41	7	12	0	TILKKPSILVFDEATSALD	|::.:|.:.:.||..|.||	TLVSEPDVFLLDEPLSNLD
0.5	63	24	35	19	0.292	0.792	0.543	41	7	12	0	TILKKPSILVFDEATSALD	|::.:|.:.:.||..|.||	TLVSEPDVFLLDEPLSNLD
0.5	153	26	23	19	0.269	0.731	0.826	45	7	13	0	MVTRPELLMLDEPAAGLNP	|...|::|::||..:.|:|	MANNPDILLMDEAFSALDP
0.321	506	28	39	19	0.25	0.679	0.487	37	7	9	0	AHLLALANQHADSASNPRP	|||:.....|.|:...|.|	AHLMLATLDHGDTVLVPNP
0.389	549	36	29	19	0.194	0.528	0.655	37	7	14	0	GEAGAQLLSSLIAPNDVLG	|..|:||.::|:..::|:|	GYLGSQLANALMLEHEVVG
0.457	440	35	40	33	0.343	0.943	0.8	36	12	16	1	INDDVFNWDDLPESVAVFGPGVIGLELGQALHR	::.|:.:| ||.|....|.|....||...||.|	VSCDLLDW-DLVEQNPFFCPDASKLEPLDALMR
0.429	440	35	26	22	0.229	0.629	0.808	38	8	15	1	WDDLPESVAVFGPGVIGLELGQ	:|| |:.|::||..:..::.||	FDD-PQIVSLFGDAIQYIDYGQ
0.371	540	35	23	22	0.229	0.629	0.957	41	8	13	0	LQFALEPILSAENFPAMLTAEQ	:.|..||:.:..:|.|.||.|:	IAFQFEPVAAGLDFEATLTEEK
0.452	637	31	35	25	0.29	0.806	0.714	40	9	14	0	GTIAMLNEISSDTLEQLYSLAFNQY	|...:|..||:|.||.|.:.|.:.:	GMNVLLRPISADVLENLINTAASSF
0.4	302	35	31	25	0.257	0.714	0.806	40	9	14	0	GMNVLLRPISADVLENLINTAASSF	|...:|..||:|.||.|.:.|.:.:	GTIAMLNEISSDTLEQLYSLAFNQY
0.441	377	34	37	28	0.294	0.824	0.757	41	10	15	0	AIPAEMAISGFHGLDIGQATTPILASVT	|:.|.:|.:|...|..|...||.:|.:|	ALEAGLAAAGLSALFTGPMPTPAVAYLT
0.441	377	34	38	28	0.294	0.824	0.737	41	10	15	0	AIPAEMAISGFHGLDIGQATTPILASVT	|:.|.:|.:|...|..|...||.:|.:|	ALEAGLAAAGLSALFTGPMPTPAVAYLT
0.359	557	39	30	28	0.256	0.718	0.933	37	10	14	0	GAGAGAVGGAVLTGSTLGTLGGAAIGGV	|..|.:.|...|..:|...||.||:|.:	GLLAHSDGDVALHAATDALLGAAALGDI
0.458	96	24	35	17	0.25	0.708	0.486	36	6	11	0	QPVEQSTLVSTAAVNKE	||.:||.|::.|.:..:	QPAQQSDLINVAQLTSQ
0.414	54	29	18	17	0.207	0.586	0.944	38	6	12	0	GASIFGIKPNASATIGK	|||:.|...:::.::||	GASVVGFSDSSNTSLGK
0.414	54	29	19	17	0.207	0.586	0.895	38	6	12	0	GASIFGIKPNASATIGK	|||:.|...:::.::||	GASVVGFSDSSNTSLGK
0.52	58	25	21	20	0.28	0.8	0.952	37	7	13	0	ISVGIEDSEDLIADLDHAFQ	:.:|:|:.:||..||...|:	LHIGLENVQDLQDDLAAGFE
0.462	153	26	21	20	0.269	0.769	0.952	43	7	12	0	MVTRPELLMLDEPAAGLNPK	:|..|.|::.|||...|:.:	LVNNPSLVLADEPTGNLDQR
0.312	599	32	26	20	0.219	0.625	0.769	36	7	10	0	TCTRNYLGCCNTGINTRVSI	||....:|.....:||.|:|	TCPNALIGIITNPVNTTVAI
0.312	599	32	27	20	0.219	0.625	0.741	36	7	10	0	TCTRNYLGCCNTGINTRVSI	||....:|.....:||.|:|	TCPNALIGIITNPVNTTVAI
0.343	302	35	24	20	0.2	0.571	0.833	37	7	12	0	AQSGNLEGMNVLLRPISADV	|.||..:|:|:|...:..|:	AASGVAQGVNILSASLHTDI
0.542	63	24	25	23	0.333	0.958	0.92	41	8	13	0	ILKKPSILVFDEATSALDTHTER	::.:|.|:..||.|..||...|:	LVNQPPIIFADEPTGNLDEENEQ
0.5	63	24	31	23	0.333	0.958	0.742	40	8	12	0	ILKKPSILVFDEATSALDTHTER	:|....:.:.||.|..||..||:	LLHSAPLWLLDEPTEGLDAETEQ
0.467	575	30	28	26	0.3	0.867	0.929	37	9	14	0	LGAGGDFAQAYVIAHEVGHHVQHLMG	|.:..|.|.|..:||:.|...|::.|	LSSRPDDALANTLAHQDGEQQQNVAG
0.419	637	31	34	26	0.29	0.839	0.765	39	9	13	0	GGTIAMLNEISSDTLEQLYSLAFNQY	|..|...|.|.::.:.|..:|.||.|	GSAIITPNVIRAELIAQYQTLEFNGY
0.652	280	23	38	21	0.304	0.913	0.526	37	7	15	1	SDMLDTTIDLINVLSEQYNID	:|.|| |::|:..|.|:::.:	ADSLD-TVELVMALEEEFDTE
0.593	104	27	31	24	0.296	0.889	0.774	46	8	16	0	LLLLDEPSLGLAPIIILQIFDTIQ	::|.|||:..|.|.::.::..||:	VILFDEPTSALDPELVGEVLSTIR
0.458	598	24	38	21	0.292	0.875	0.553	38	7	11	0	VKRAETSETRSAPLVTTTKLM	:.:..|.|.:.|||.|...|:	IDKIVTEEDKGAPLATAVSLL
0.458	598	24	39	21	0.292	0.875	0.538	38	7	11	0	VKRAETSETRSAPLVTTTKLM	:.:..|.|.:.|||.|...|:	IDKIVTEEDKGAPLATAVSLL
0.484	352	31	33	24	0.258	0.774	0.727	37	8	15	0	DTDLDTDLSIDELEIEDLMNDFFK	:|.|::...:.:|.:|||:.|..|	NTVLESFPELADLSVEDLIKDLDK
0.484	352	31	38	24	0.258	0.774	0.632	37	8	15	0	DTDLDTDLSIDELEIEDLMNDFFK	:|.|::...:.:|.:|||:.|..|	NTVLESFPELADLSVEDLIKDLDK
0.5	96	24	22	18	0.25	0.75	0.818	39	6	12	0	LEQPVEQSTLVSTAAVNK	::.|:.|:||:.|...|:	IKDPITQTTLIPTGKPNR
0.5	96	24	29	18	0.25	0.75	0.621	39	6	12	0	LEQPVEQSTLVSTAAVNK	::.|:.|:||:.|...|:	IKDPITQTTLIPTGKPNR
0.423	153	26	25	18	0.231	0.692	0.72	39	6	11	0	MVTRPELLMLDEPAAGLN	:|.:|.::..|||...|:	LVNQPPIIFADEPTGNLD
0.256	557	39	43	27	0.231	0.692	0.628	36	9	10	0	GAGAGAVGGAVLTGSTLGTLGGAAIGG	|.|.|..||........|.:.|...||	GGGFGGGGGGADFSDIFGDVFGDIFGG
0.256	557	39	44	27	0.231	0.692	0.614	36	9	10	0	GAGAGAVGGAVLTGSTLGTLGGAAIGG	|.|.|..||........|.:.|...||	GGGFGGGGGGADFSDIFGDVFGDIFGG
0.256	557	39	46	27	0.231	0.692	0.587	36	9	10	0	GAGAGAVGGAVLTGSTLGTLGGAAIGG	|.|.|..||........|.:.|...||	GGGFGGGGGGADFSDIFGDVFGDIFGG
0.256	557	39	47	27	0.231	0.692	0.574	36	9	10	0	GAGAGAVGGAVLTGSTLGTLGGAAIGG	|.|.|..||........|.:.|...||	GGGFGGGGGGADFSDIFGDVFGDIFGG
0.48	181	25	33	15	0.2	0.6	0.455	36	5	12	0	STPEGTPDDSAVPSA	:||:|:.|.:.:|::	TTPQGSLDPNKIPAS
0.346	392	26	33	15	0.192	0.577	0.455	36	5	9	0	PQGGINPGETPEQAM	|||.::|.:.|...:	PQGSLDPNKIPASTL
0.444	437	27	27	15	0.185	0.556	0.556	39	5	12	0	PIVDLTDDDIANFEK	|::||.:|::.:|.:	PVLDLPEDELLSFSQ
0.421	209	38	22	21	0.184	0.553	0.955	37	7	16	0	VAIAALPVSEVLDELLSALQS	:|.|.||:.|::.:.:||:::	IADATLPLDELVADPVSAVEA
0.421	209	38	35	21	0.184	0.553	0.6	37	7	16	0	VAIAALPVSEVLDELLSALQS	:|.|.||:.|::.:.:||:::	IADATLPLDELVADPVSAVEA
0.419	574	31	41	25	0.258	0.806	0.61	38	8	13	0	YIPGIFRPELVDQVLDITQSVAEQT	::||....|:.|:.|.:.|..|..|	FMPGASEAEIQDEFLALEQIEANDT
0.556	144	27	38	22	0.259	0.815	0.579	45	7	15	0	RPDLDDDELASSMALSPELIAQ	|||.::|:.|.:..:||.::.:	RPDFNNDDYAIACCVSPMIVGK
0.452	637	31	27	22	0.226	0.71	0.815	38	7	14	0	GGTIAMLNEISSDTLEQLYSLA	|||:.::...|:..|:.|:.:|	GGTLTVIPNSSNIPLDSLFDIA
0.565	211	23	20	19	0.261	0.826	0.95	45	6	13	0	AVVIPIFDNDQDIPVLAQR	::|||:::..:.:|.|..|	SIVIPVYNEQESLPALIDR
0.441	576	34	26	19	0.176	0.559	0.692	37	6	15	1	DEPTSALDPISTLTIEELI	::|..| :|::.:|::||:	NQPLQA-EPLAEITLDELV
0.478	248	23	25	16	0.217	0.696	0.64	40	5	11	0	ITEHLAYQWLDAAEAA	:..|::.:|:|:..||	VASHISSEWIDSLTAA
0.333	590	30	19	16	0.167	0.533	0.842	37	5	10	0	ALDSYWPVMGVEYQAA	|:..:||..|..::|:	AIVGHWPTAGYHFEAS
0.344	414	32	29	16	0.156	0.5	0.552	37	5	11	0	GIGIAIGITLIIGTLM	|:||...:.:::|.|:	GVGIGAAVGVVLGVLL
0.344	414	32	34	16	0.156	0.5	0.471	37	5	11	0	GIGIAIGITLIIGTLM	|:||...:.:::|.|:	GVGIGAAVGVVLGVLL
0.364	72	33	33	16	0.152	0.485	0.485	37	5	12	0	MIIDKMTTAENLMLGI	:::||.||.:.::.|:	ILLDKTTTGDGIVAGL
0.586	223	29	32	29	0.31	1	0.875	36	9	17	1	EIQQQYGEQQASLAVEAAFAGLANELLAR	|::.|.|: :..:|::|...|....||:|	ELEIQVGD-EVDVALDAVEDGFGETLLSR
0.478	211	23	24	13	0.174	0.565	0.542	36	4	11	0	HLDAVVIPIFDND	|:|.:::|:.|::	HVDMLIVPLRDDE
0.4	452	30	20	13	0.133	0.433	0.65	36	4	12	0	IIDLRNLLIIGGQ	:.|:::::::|||	VSDIQDVILVGGQ
0.4	452	30	24	13	0.133	0.433	0.542	36	4	12	0	IIDLRNLLIIGGQ	:.|:::::::|||	VSDIQDVILVGGQ
0.4	452	30	30	13	0.133	0.433	0.433	36	4	12	0	IIDLRNLLIIGGQ	:.|:::::::|||	VSDIQDVILVGGQ
0.52	461	25	24	23	0.28	0.92	0.958	40	7	13	0	LGSLFNPASPRPLQIAPNVLGGI	:|.:|...:|.|:.|..|:..|:	VGMVFQKPTPFPMSIYDNIAFGV
0.52	461	25	26	23	0.28	0.92	0.885	40	7	13	0	LGSLFNPASPRPLQIAPNVLGGI	:|.:|...:|.|:.|..|:..|:	VGMVFQKPTPFPMSIYDNIAFGV
0.429	103	28	24	23	0.25	0.821	0.958	36	7	12	0	DSLITPQQLAEKLPISEVIADNV	|.::.|..:.|.|.|..|:.|.:	DGVLDPLDVMEHLAIISVVGDGM
0.343	302	35	37	23	0.2	0.657	0.622	39	7	12	0	GNLEGMNVLLRPISADVLENLIN	|.|||:..|:.|.:.:.:....|	GTLEGLGTLMGPSAQEYMAGAFN
0.591	178	22	27	20	0.273	0.909	0.741	36	6	13	0	GLNVQDFAIAGIDGVSDAIR	|:.||..|::|:|.:...::	GVPVQSAALSGVDSLYSIVQ
0.591	178	22	28	20	0.273	0.909	0.714	36	6	13	0	GLNVQDFAIAGIDGVSDAIR	|:.||..|::|:|.:...::	GVPVQSAALSGVDSLYSIVQ
0.591	178	22	29	20	0.273	0.909	0.69	36	6	13	0	GLNVQDFAIAGIDGVSDAIR	|:.||..|::|:|.:...::	GVPVQSAALSGVDSLYSIVQ
0.591	178	22	30	20	0.273	0.909	0.667	36	6	13	0	GLNVQDFAIAGIDGVSDAIR	|:.||..|::|:|.:...::	GVPVQSAALSGVDSLYSIVQ
0.591	178	22	47	20	0.273	0.909	0.426	36	6	13	0	GLNVQDFAIAGIDGVSDAIR	|:.||..|::|:|.:...::	GVPVQSAALSGVDSLYSIVQ
0.52	295	25	28	20	0.24	0.8	0.714	37	6	13	0	LLDQLSNSQPIQQIIIPGQL	|:|.|.:|..:|::...|::	LIDMLEDSDDVQEVYHNGEI
0.52	491	25	35	20	0.24	0.8	0.571	44	6	13	0	PVTAEGEAAADWVLNSLADL	|:..||:..:||::..|.::	PLGIEGQGVSDWIVVDLGEV
0.577	153	26	31	20	0.231	0.769	0.645	48	6	15	0	MVTRPELLMLDEPAAGLNPK	:..:|::::.|||.:.|:|:	LAMQPQVILFDEPTSALDPE
0.379	54	29	35	20	0.207	0.69	0.571	38	6	11	0	GFGALIDAGASIFGIKPNAS	|..|::|...::||:....|	GLSAVLDTAPNVFGLADGGS
0.419	276	31	32	21	0.194	0.677	0.656	36	6	13	0	VSPDTPVALISAGVGQTPMLS	::.:.||||:..|:....|::	LAEEVPVALVYNGISHVVMMA
0.448	490	29	28	25	0.241	0.862	0.893	38	7	13	0	DLTLIHWPSPNDEVSVAEFMSELLK	||.|:||...:......:.:.:||:	DLPLVHWGVQDALYQAEQALDDLLR
0.533	425	30	25	25	0.233	0.833	0.96	39	7	16	1	RPQLLDVLFDDAVAAENGPLHNVQQ	|...:.::|.:.:.:.| ||||:::	RGNQISMIFQEPMVSLN-PLHNIEK
0.419	276	31	28	25	0.226	0.806	0.893	38	7	13	0	DFFLDVSPDTPVALISAGVGQTPML	:..:|:|||.|..:.|.....:.:|	NLLIDISPDFPFQITSLDAAGSNLL
0.419	226	31	30	25	0.226	0.806	0.833	37	7	13	0	LDDDLAPGEYRPLTAEEIASVGAPH	:|.|.|..::..|...|:.::.|.|	IDPDTATADFYSLGLGEVHAIAASH
0.375	581	32	28	22	0.188	0.688	0.786	36	6	12	0	LSSIVDNEQTSDALEDVVMGLI	|.|:.|.:...:.|.|..:|::	LDSVSDRDHVLELLSDASIGMV
0.448	513	29	31	15	0.138	0.517	0.484	41	4	13	0	PLEGVQFHPESILSE	|::|:.:|.::::|:	PIDGIIYHDDAVMSD
0.448	513	29	32	15	0.138	0.517	0.469	41	4	13	0	PLEGVQFHPESILSE	|::|:.:|.::::|:	PIDGIIYHDDAVMSD
0.591	544	22	40	19	0.227	0.864	0.475	36	5	13	0	IALPILNPESAILIQLSAV	::.||:||..:.::.:.|:	MSTPIINPPQSAILGMHAI
0.591	544	22	42	19	0.227	0.864	0.452	36	5	13	0	IALPILNPESAILIQLSAV	::.||:||..:.::.:.|:	MSTPIINPPQSAILGMHAI
0.652	214	23	35	23	0.261	1	0.657	41	6	15	0	LKSVSGDIPKPMVDISGKPFLYR	|:.:|.|:.:.:::.:...|:||	LRPISADVLENLINTAASSFVYR
0.652	214	23	36	23	0.261	1	0.639	41	6	15	0	LKSVSGDIPKPMVDISGKPFLYR	|:.:|.|:.:.:::.:...|:||	LRPISADVLENLINTAASSFVYR

## Sheet: YSTB_singlets_vs_YPPF peptides
singlet_Similarity_Coverage	singlet_Number	singlet_Seq_Length	peptide_Seq_Length	Aligned_Length	singlet_Identity_Coverage	singlet_Residue_Coverage	peptide_Residue_Coverage	Score	Identity	Similarity	Gaps	singlet_Region	Alignment	peptide_Region
1	2	22	22	22	1	1	1	100	22	22	0	VRSVVYTRLAQSASEVLSAGQR	||||||||||||||||||||||	VRSVVYTRLAQSASEVLSAGQR
1	6	25	25	25	1	1	1	129	25	25	0	NMLRLFVNASDHESNTQIDALVGCK	|||||||||||||||||||||||||	NMLRLFVNASDHESNTQIDALVGCK
1	7	24	24	24	1	1	1	120	24	24	0	DFPELNSVTYSLEDVELEAQEGIK	||||||||||||||||||||||||	DFPELNSVTYSLEDVELEAQEGIK
1	9	15	15	15	1	1	1	78	15	15	0	ASGIQTGGPNTLNQR	|||||||||||||||	ASGIQTGGPNTLNQR
1	11	15	15	15	1	1	1	75	15	15	0	NIRAQLLVCSKHLLK	|||||||||||||||	NIRAQLLVCSKHLLK
1	17	10	10	10	1	1	1	60	10	10	0	YHTGINPNGK	||||||||||	YHTGINPNGK
1	18	16	16	16	1	1	1	94	16	16	0	HHFPDIPVYGPQETAK	||||||||||||||||	HHFPDIPVYGPQETAK
1	21	14	14	14	1	1	1	76	14	14	0	ITGFYRPLANGPLK	||||||||||||||	ITGFYRPLANGPLK
1	27	11	11	11	1	1	1	59	11	11	0	DPVTSGYSGQR	|||||||||||	DPVTSGYSGQR
1	28	11	11	11	1	1	1	57	11	11	0	LANPDPLAAGK	|||||||||||	LANPDPLAAGK
1	32	21	21	21	1	1	1	101	21	21	0	DQPAELSADVVVANILAGPLR	|||||||||||||||||||||	DQPAELSADVVVANILAGPLR
1	39	21	21	21	1	1	1	110	21	21	0	FGFIFDELGFTPAATFAESGR	|||||||||||||||||||||	FGFIFDELGFTPAATFAESGR
1	41	14	14	14	1	1	1	68	14	14	0	SKSNLDTEQGLLER	||||||||||||||	SKSNLDTEQGLLER
1	43	16	16	16	1	1	1	76	16	16	0	LLENLSAPLFALLPAK	||||||||||||||||	LLENLSAPLFALLPAK
1	45	13	13	13	1	1	1	61	13	13	0	LLLEHLIEQLEAR	|||||||||||||	LLLEHLIEQLEAR
1	47	12	12	12	1	1	1	62	12	12	0	AIEMYGAPIYVR	||||||||||||	AIEMYGAPIYVR
1	49	11	11	11	1	1	1	60	11	11	0	HSHIVNMFEQR	|||||||||||	HSHIVNMFEQR
1	54	29	29	29	1	1	1	142	29	29	0	VLGSGFGALIDAGASIFGIKPNASATIGK	|||||||||||||||||||||||||||||	VLGSGFGALIDAGASIFGIKPNASATIGK
1	58	25	25	25	1	1	1	121	25	25	0	ISVGIEDSEDLIADLDHAFQLAVTR	|||||||||||||||||||||||||	ISVGIEDSEDLIADLDHAFQLAVTR
1	60	14	14	14	1	1	1	78	14	14	0	GFHIDVFQHVNNAR	||||||||||||||	GFHIDVFQHVNNAR
1	75	9	9	9	1	1	1	37	9	9	0	LVLASIISK	|||||||||	LVLASIISK
1	78	20	20	20	1	1	1	116	20	20	0	AFALPNWWYLPVDAQLPSDR	||||||||||||||||||||	AFALPNWWYLPVDAQLPSDR
1	81	11	11	11	1	1	1	52	11	11	0	DSLDQIIGVVR	|||||||||||	DSLDQIIGVVR
1	82	16	16	16	1	1	1	86	16	16	0	GGHFLRPTVLADVDNR	||||||||||||||||	GGHFLRPTVLADVDNR
1	83	8	8	8	1	1	1	38	8	8	0	DFITALLK	||||||||	DFITALLK
1	89	12	12	12	1	1	1	57	12	12	0	VPVPLVIESQVK	||||||||||||	VPVPLVIESQVK
1	90	12	12	12	1	1	1	54	12	12	0	ATVIQQFAALLE	||||||||||||	ATVIQQFAALLE
1	94	8	8	8	1	1	1	41	8	8	0	SPAHILEK	||||||||	SPAHILEK
1	96	24	24	24	1	1	1	113	24	24	0	RIETQLEQPVEQSTLVSTAAVNKE	||||||||||||||||||||||||	RIETQLEQPVEQSTLVSTAAVNKE
1	100	10	10	10	1	1	1	50	10	10	0	HGLLEFLALR	||||||||||	HGLLEFLALR
1	103	28	28	28	1	1	1	132	28	28	0	IDSLITPQQLAEKLPISEVIADNVTASR	||||||||||||||||||||||||||||	IDSLITPQQLAEKLPISEVIADNVTASR
1	104	27	27	27	1	1	1	128	27	27	0	LLLLDEPSLGLAPIIILQIFDTIQQLR	|||||||||||||||||||||||||||	LLLLDEPSLGLAPIIILQIFDTIQQLR
1	112	15	15	15	1	1	1	82	15	15	0	EGLDVNSHGENAYNQ	|||||||||||||||	EGLDVNSHGENAYNQ
1	116	10	10	10	1	1	1	49	10	10	0	NIDVDKIEAK	||||||||||	NIDVDKIEAK
1	119	18	18	18	1	1	1	94	18	18	0	LVDPTDDSNTTSVQFYER	||||||||||||||||||	LVDPTDDSNTTSVQFYER
1	122	22	22	22	1	1	1	116	22	22	0	NHNLGASVSALTLEHYPGMTEK	||||||||||||||||||||||	NHNLGASVSALTLEHYPGMTEK
1	124	24	24	24	1	1	1	126	24	24	0	IYLTEAWPITTYPAILLQTPLEVK	||||||||||||||||||||||||	IYLTEAWPITTYPAILLQTPLEVK
1	128	26	26	26	1	1	1	136	26	26	0	ANDLLFIGNNDEEEAPLTATSYPIIH	||||||||||||||||||||||||||	ANDLLFIGNNDEEEAPLTATSYPIIH
1	136	15	15	15	1	1	1	71	15	15	0	QILDVIDIIAPTEVR	|||||||||||||||	QILDVIDIIAPTEVR
1	138	15	15	15	1	1	1	80	15	15	0	DGQNDSDTVSPLDFK	|||||||||||||||	DGQNDSDTVSPLDFK
1	139	12	12	12	1	1	1	57	12	12	0	MEQQLQNSSLKR	||||||||||||	MEQQLQNSSLKR
1	141	24	24	24	1	1	1	120	24	24	0	MLDLADNLSEWLSQAPLSLEEEQR	||||||||||||||||||||||||	MLDLADNLSEWLSQAPLSLEEEQR
1	144	27	27	27	1	1	1	135	27	27	0	RGHRPDLDDDELASSMALSPELIAQLK	|||||||||||||||||||||||||||	RGHRPDLDDDELASSMALSPELIAQLK
1	146	8	8	8	1	1	1	43	8	8	0	DSLGLDQH	||||||||	DSLGLDQH
1	151	16	16	16	1	1	1	87	16	16	0	HGISYIYVTQHLGMMK	||||||||||||||||	HGISYIYVTQHLGMMK
1	152	12	12	12	1	1	1	64	12	12	0	MTLAPSDHNDVK	||||||||||||	MTLAPSDHNDVK
1	159	22	22	22	1	1	1	112	22	22	0	TIAETLNVTHTTVSNVFNRPEK	||||||||||||||||||||||	TIAETLNVTHTTVSNVFNRPEK
1	160	19	19	19	1	1	1	100	19	19	0	TATPADFAEIWPLFQAVIR	|||||||||||||||||||	TATPADFAEIWPLFQAVIR
1	162	26	26	26	1	1	1	137	26	26	0	NQADDPLGSETQAGSPSYDTAYADTR	||||||||||||||||||||||||||	NQADDPLGSETQAGSPSYDTAYADTR
1	163	15	15	15	1	1	1	74	15	15	0	IITALSGVVCLSGYR	|||||||||||||||	IITALSGVVCLSGYR
1	164	15	15	15	1	1	1	82	15	15	0	TSSKHGFGDYDKIKK	|||||||||||||||	TSSKHGFGDYDKIKK
1	165	11	11	11	1	1	1	57	11	11	0	FTQDFLALQYK	|||||||||||	FTQDFLALQYK
1	166	10	10	10	1	1	1	50	10	10	0	GMDHVIALIR	||||||||||	GMDHVIALIR
1	168	17	17	17	1	1	1	81	17	17	0	LQPQAAEAFQAMQQAAK	|||||||||||||||||	LQPQAAEAFQAMQQAAK
1	170	15	15	15	1	1	1	80	15	15	0	VSLVNDGPVTFWLQV	|||||||||||||||	VSLVNDGPVTFWLQV
1	173	19	19	19	1	1	1	92	19	19	0	ANVSIPASAASETPVSTPD	|||||||||||||||||||	ANVSIPASAASETPVSTPD
1	174	16	16	16	1	1	1	90	16	16	0	QGANSPTLDDTGYNPD	||||||||||||||||	QGANSPTLDDTGYNPD
1	175	18	18	18	1	1	1	84	18	18	0	MVENALLEIPSGLVEAAR	||||||||||||||||||	MVENALLEIPSGLVEAAR
1	178	22	22	22	1	1	1	106	22	22	0	SAGLNVQDFAIAGIDGVSDAIR	||||||||||||||||||||||	SAGLNVQDFAIAGIDGVSDAIR
1	183	14	14	14	1	1	1	76	14	14	0	THGSGNPGATNVLR	||||||||||||||	THGSGNPGATNVLR
1	190	31	31	31	1	1	1	156	31	31	0	ELATFAYEHNAVFLVENYVNNIIGSVGQVAR	|||||||||||||||||||||||||||||||	ELATFAYEHNAVFLVENYVNNIIGSVGQVAR
1	194	9	9	9	1	1	1	49	9	9	0	LFQPSPFFL	|||||||||	LFQPSPFFL
1	199	16	16	16	1	1	1	86	16	16	0	LREQHPEIVPSEHLNK	||||||||||||||||	LREQHPEIVPSEHLNK
1	206	14	14	14	1	1	1	65	14	14	0	LKQVLNQAVQSFLK	||||||||||||||	LKQVLNQAVQSFLK
1	207	9	9	9	1	1	1	40	9	9	0	SAFVVEAAR	|||||||||	SAFVVEAAR
1	209	38	38	38	1	1	1	179	38	38	0	KNDVAIAALPVSEVLDELLSALQSSSQVLLHAPTGAGK	||||||||||||||||||||||||||||||||||||||	KNDVAIAALPVSEVLDELLSALQSSSQVLLHAPTGAGK
1	213	15	15	15	1	1	1	70	15	15	0	MQTSPLLESLMEALR	|||||||||||||||	MQTSPLLESLMEALR
1	216	25	25	25	1	1	1	135	25	25	0	FHKGIEGIGFTQTRNTVNGGFSPLR	|||||||||||||||||||||||||	FHKGIEGIGFTQTRNTVNGGFSPLR
1	217	20	20	20	1	1	1	102	20	20	0	SEHLSKDPLHGITLEQLLTK	||||||||||||||||||||	SEHLSKDPLHGITLEQLLTK
1	219	13	13	13	1	1	1	66	13	13	0	ELEDALGFPLFIR	|||||||||||||	ELEDALGFPLFIR
1	224	24	24	24	1	1	1	126	24	24	0	VLIEPLNNDNMPGYFISSFPLAEK	||||||||||||||||||||||||	VLIEPLNNDNMPGYFISSFPLAEK
1	225	23	23	23	1	1	1	108	23	23	0	FNLIYTIGSEFASAVSQAASEAR	|||||||||||||||||||||||	FNLIYTIGSEFASAVSQAASEAR
1	229	24	24	24	1	1	1	128	24	24	0	YHLLPHLSAAHNVEVPAVYAGLGK	||||||||||||||||||||||||	YHLLPHLSAAHNVEVPAVYAGLGK
1	233	18	18	18	1	1	1	94	18	18	0	AHDATVAVGTNQTGTNNR	||||||||||||||||||	AHDATVAVGTNQTGTNNR
1	235	28	28	28	1	1	1	148	28	28	0	SGTMTYTGLNAQTRPDPQIGLNSQAGPK	||||||||||||||||||||||||||||	SGTMTYTGLNAQTRPDPQIGLNSQAGPK
1	236	11	11	11	1	1	1	62	11	11	0	GHLYAHQGLEK	|||||||||||	GHLYAHQGLEK
1	238	25	25	25	1	1	1	131	25	25	0	ALVNQPPIIFADEPTGNLDEENEQR	|||||||||||||||||||||||||	ALVNQPPIIFADEPTGNLDEENEQR
1	241	19	19	19	1	1	1	92	19	19	0	TDVGGSATFAVVRGGIIIK	|||||||||||||||||||	TDVGGSATFAVVRGGIIIK
1	242	12	12	12	1	1	1	69	12	12	0	YQHYTPSDETRR	||||||||||||	YQHYTPSDETRR
1	244	13	13	13	1	1	1	71	13	13	0	MNYQHWLSLAAAR	|||||||||||||	MNYQHWLSLAAAR
1	246	18	18	18	1	1	1	93	18	18	0	QPQDPLLAPLFTLIEQGK	||||||||||||||||||	QPQDPLLAPLFTLIEQGK
1	251	23	23	23	1	1	1	112	23	23	0	VPAELLASFGKPQFAMLLALNER	|||||||||||||||||||||||	VPAELLASFGKPQFAMLLALNER
1	254	17	17	17	1	1	1	79	17	17	0	NITQLDELVQEAEALLR	|||||||||||||||||	NITQLDELVQEAEALLR
1	256	19	19	19	1	1	1	105	19	19	0	ISELGNNVMNFPYLPGNKP	|||||||||||||||||||	ISELGNNVMNFPYLPGNKP
1	258	21	21	21	1	1	1	109	21	21	0	YFDRYDAEMESLLAGSQGDKR	|||||||||||||||||||||	YFDRYDAEMESLLAGSQGDKR
1	262	13	13	13	1	1	1	66	13	13	0	VELSHKPISHALK	|||||||||||||	VELSHKPISHALK
1	263	13	13	13	1	1	1	74	13	13	0	SHYDHLMLQLHDK	|||||||||||||	SHYDHLMLQLHDK
1	268	12	12	12	1	1	1	55	12	12	0	QLINILEAGIAK	||||||||||||	QLINILEAGIAK
1	273	15	15	15	1	1	1	70	15	15	0	DLADVSISYLNLSSK	|||||||||||||||	DLADVSISYLNLSSK
1	274	26	26	26	1	1	1	134	26	26	0	PQLDEHYLVITALGADRPGIVNTITR	||||||||||||||||||||||||||	PQLDEHYLVITALGADRPGIVNTITR
1	280	23	23	23	1	1	1	114	23	23	0	TSDMLDTTIDLINVLSEQYNIDK	|||||||||||||||||||||||	TSDMLDTTIDLINVLSEQYNIDK
1	281	12	12	12	1	1	1	61	12	12	0	GSQVTDSHGLVR	||||||||||||	GSQVTDSHGLVR
1	286	9	9	9	1	1	1	53	9	9	0	KLYTYGQCR	|||||||||	KLYTYGQCR
1	288	18	18	18	1	1	1	87	18	18	0	LDLVNREEFDVQTQVLLR	||||||||||||||||||	LDLVNREEFDVQTQVLLR
1	294	12	12	12	1	1	1	56	12	12	0	LVAEEVQNFSAK	||||||||||||	LVAEEVQNFSAK
1	295	25	25	25	1	1	1	119	25	25	0	AAQQLLDQLSNSQPIQQIIIPGQLV	|||||||||||||||||||||||||	AAQQLLDQLSNSQPIQQIIIPGQLV
1	298	8	8	8	1	1	1	40	8	8	0	TAPVIEDR	||||||||	TAPVIEDR
1	302	35	35	35	1	1	1	169	35	35	0	AQSGNLEGMNVLLRPISADVLENLINTAASSFVYR	|||||||||||||||||||||||||||||||||||	AQSGNLEGMNVLLRPISADVLENLINTAASSFVYR
1	303	12	12	12	1	1	1	60	12	12	0	DLDLLTLDLQPQ	||||||||||||	DLDLLTLDLQPQ
1	305	16	16	16	1	1	1	73	16	16	0	DAIALNGSAEASQLSR	||||||||||||||||	DAIALNGSAEASQLSR
1	310	10	10	10	1	1	1	49	10	10	0	NTVNTAIQQR	||||||||||	NTVNTAIQQR
1	313	13	13	13	1	1	1	66	13	13	0	NGNVQAITQDDAK	|||||||||||||	NGNVQAITQDDAK
1	316	15	15	15	1	1	1	75	15	15	0	VSSAPLWQLNLLEIK	|||||||||||||||	VSSAPLWQLNLLEIK
1	318	16	16	16	1	1	1	80	16	16	0	DDIDAEQSTQEPLSER	||||||||||||||||	DDIDAEQSTQEPLSER
1	322	17	17	17	1	1	1	89	17	17	0	FRCFSFLSGELGNTLSR	|||||||||||||||||	FRCFSFLSGELGNTLSR
1	323	16	16	16	1	1	1	85	16	16	0	ALNALHHIPEEITAHR	||||||||||||||||	ALNALHHIPEEITAHR
1	325	16	16	16	1	1	1	76	16	16	0	VKEDVAAQEANNSTLK	||||||||||||||||	VKEDVAAQEANNSTLK
1	327	16	16	16	1	1	1	73	16	16	0	FLVLIAAVIDDSDVLT	||||||||||||||||	FLVLIAAVIDDSDVLT
1	328	19	19	19	1	1	1	96	19	19	0	ISWEEAFETIAGSMQNIIK	|||||||||||||||||||	ISWEEAFETIAGSMQNIIK
1	335	16	16	16	1	1	1	79	16	16	0	DGSALLTHLLDADLQR	||||||||||||||||	DGSALLTHLLDADLQR
1	338	18	18	18	1	1	1	92	18	18	0	WLEAVLPLFQPVSEVTIR	||||||||||||||||||	WLEAVLPLFQPVSEVTIR
1	351	12	12	12	1	1	1	63	12	12	0	YNMPVIPEMVAR	||||||||||||	YNMPVIPEMVAR
1	352	31	31	31	1	1	1	159	31	31	0	KPVSLTPDTDLDTDLSIDELEIEDLMNDFFK	|||||||||||||||||||||||||||||||	KPVSLTPDTDLDTDLSIDELEIEDLMNDFFK
1	355	29	29	29	1	1	1	136	29	29	0	TAVNQLISALAQSIPLLDIEPLQANKLEK	|||||||||||||||||||||||||||||	TAVNQLISALAQSIPLLDIEPLQANKLEK
1	360	15	15	15	1	1	1	71	15	15	0	LTDADQQTVDAAVSR	|||||||||||||||	LTDADQQTVDAAVSR
1	363	15	15	15	1	1	1	68	15	15	0	YQVSSLAELQALLFA	|||||||||||||||	YQVSSLAELQALLFA
1	364	18	18	18	1	1	1	93	18	18	0	YFGVSNFTPTQFSLLQSR	||||||||||||||||||	YFGVSNFTPTQFSLLQSR
1	365	12	12	12	1	1	1	59	12	12	0	GVGLYLIEETLR	||||||||||||	GVGLYLIEETLR
1	366	15	15	15	1	1	1	75	15	15	0	VVGAEQTENNQDVEK	|||||||||||||||	VVGAEQTENNQDVEK
1	367	13	13	13	1	1	1	69	13	13	0	NDLGLVVACLPYA	|||||||||||||	NDLGLVVACLPYA
1	369	30	30	30	1	1	1	153	30	30	0	KPVQDENKIAGSVLGAVAGGVLGHQVGGGR	||||||||||||||||||||||||||||||	KPVQDENKIAGSVLGAVAGGVLGHQVGGGR
1	370	24	24	24	1	1	1	116	24	24	0	LLLVGNPDTITPLLANADSLLLER	||||||||||||||||||||||||	LLLVGNPDTITPLLANADSLLLER
1	371	18	18	18	1	1	1	101	18	18	0	KVPLHPAIISNYPLDWVK	||||||||||||||||||	KVPLHPAIISNYPLDWVK
1	376	11	11	11	1	1	1	54	11	11	0	ERDYLVTELSR	|||||||||||	ERDYLVTELSR
1	377	34	34	34	1	1	1	169	34	34	0	LGVAIPAEMAISGFHGLDIGQATTPILASVTTPR	||||||||||||||||||||||||||||||||||	LGVAIPAEMAISGFHGLDIGQATTPILASVTTPR
1	382	26	26	26	1	1	1	130	26	26	0	AQAQLLLDVYQHTLPASAESLWLQIR	||||||||||||||||||||||||||	AQAQLLLDVYQHTLPASAESLWLQIR
1	386	19	19	19	1	1	1	93	19	19	0	VNPDMVFSLPLLGSELLVR	|||||||||||||||||||	VNPDMVFSLPLLGSELLVR
1	388	18	18	18	1	1	1	87	18	18	0	DTQLMLLQEAQTTPELVR	||||||||||||||||||	DTQLMLLQEAQTTPELVR
1	390	22	22	22	1	1	1	111	22	22	0	RQFILSGSITPETVDIYHASRR	||||||||||||||||||||||	RQFILSGSITPETVDIYHASRR
1	391	28	28	28	1	1	1	148	28	28	0	ILAINPECHVTCIDDFITADNVAELLNK	||||||||||||||||||||||||||||	ILAINPECHVTCIDDFITADNVAELLNK
1	392	26	26	26	1	1	1	152	26	26	0	RYGQHSWQFPQGGINPGETPEQAMYR	||||||||||||||||||||||||||	RYGQHSWQFPQGGINPGETPEQAMYR
1	394	14	14	14	1	1	1	67	14	14	0	DITEGSQVQVSNLR	||||||||||||||	DITEGSQVQVSNLR
1	397	13	13	13	1	1	1	77	13	13	0	NVETSELFDIWWD	|||||||||||||	NVETSELFDIWWD
1	403	16	16	16	1	1	1	79	16	16	0	LAQGDGLTPSTVSGVK	||||||||||||||||	LAQGDGLTPSTVSGVK
1	409	21	21	21	1	1	1	125	21	21	0	SWSTEISPWCEPSSTAVGNWR	|||||||||||||||||||||	SWSTEISPWCEPSSTAVGNWR
1	410	15	15	15	1	1	1	85	15	15	0	HVRPHEQVIGIFPPE	|||||||||||||||	HVRPHEQVIGIFPPE
1	413	20	20	20	1	1	1	99	20	20	0	IDGVFAINDPTAIGADLAAK	||||||||||||||||||||	IDGVFAINDPTAIGADLAAK
1	417	14	14	14	1	1	1	87	14	14	0	TMAPNWWQQLGFYR	||||||||||||||	TMAPNWWQQLGFYR
1	420	13	13	13	1	1	1	67	13	13	0	AQYLIAKYPDTVE	|||||||||||||	AQYLIAKYPDTVE
1	425	30	30	30	1	1	1	155	30	30	0	MRENRPQLLDVLFDDAVAAENGPLHNVQQR	||||||||||||||||||||||||||||||	MRENRPQLLDVLFDDAVAAENGPLHNVQQR
1	426	22	22	22	1	1	1	105	22	22	0	STVANAFANLGVPLVDADIIAR	||||||||||||||||||||||	STVANAFANLGVPLVDADIIAR
1	428	18	18	18	1	1	1	99	18	18	0	AFEEHAFDYLLKPLDHQR	||||||||||||||||||	AFEEHAFDYLLKPLDHQR
1	431	14	14	14	1	1	1	69	14	14	0	DLVTSQAGESGDQK	||||||||||||||	DLVTSQAGESGDQK
1	443	26	26	26	1	1	1	132	26	26	0	LEQGQYGAEDIEQTGQQASDSEYATR	||||||||||||||||||||||||||	LEQGQYGAEDIEQTGQQASDSEYATR
1	446	13	13	13	1	1	1	66	13	13	0	KVRRVCIAINPLK	|||||||||||||	KVRRVCIAINPLK
1	450	18	18	18	1	1	1	92	18	18	0	SQVVQSGPANNDLDNELD	||||||||||||||||||	SQVVQSGPANNDLDNELD
1	459	17	17	17	1	1	1	79	17	17	0	GAFPSITEVASAAQLSR	|||||||||||||||||	GAFPSITEVASAAQLSR
1	460	15	15	15	1	1	1	77	15	15	0	LPVHAVVTGGQPLVR	|||||||||||||||	LPVHAVVTGGQPLVR
1	462	18	18	18	1	1	1	89	18	18	0	YSLAPADIPLLDAFIAQR	||||||||||||||||||	YSLAPADIPLLDAFIAQR
1	464	12	12	12	1	1	1	61	12	12	0	IISNGVPESGFK	||||||||||||	IISNGVPESGFK
1	466	15	15	15	1	1	1	75	15	15	0	DTLITVDTLSTGFDR	|||||||||||||||	DTLITVDTLSTGFDR
1	472	15	15	15	1	1	1	79	15	15	0	DNSPDVVSANNMDNR	|||||||||||||||	DNSPDVVSANNMDNR
1	475	22	22	22	1	1	1	115	22	22	0	HHGLQGLLVEGGNLGLENAELR	||||||||||||||||||||||	HHGLQGLLVEGGNLGLENAELR
1	481	15	15	15	1	1	1	80	15	15	0	VLIDLPEEYLLWFAR	|||||||||||||||	VLIDLPEEYLLWFAR
1	482	16	16	16	1	1	1	77	16	16	0	TLLRIIAGLENQNAGR	||||||||||||||||	TLLRIIAGLENQNAGR
1	484	13	13	13	1	1	1	70	13	13	0	DIDGNNDIDGLTK	|||||||||||||	DIDGNNDIDGLTK
1	485	16	16	16	1	1	1	88	16	16	0	GVSHYLTTHTQAFYQR	||||||||||||||||	GVSHYLTTHTQAFYQR
1	488	13	13	13	1	1	1	68	13	13	0	IALKPYLGGKPLK	|||||||||||||	IALKPYLGGKPLK
1	491	25	25	25	1	1	1	129	25	25	0	TGKPVTAEGEAAADWVLNSLADLPK	|||||||||||||||||||||||||	TGKPVTAEGEAAADWVLNSLADLPK
1	493	26	26	26	1	1	1	150	26	26	0	GQHFDIYQGIGHEAGQAAGFYNHYGR	||||||||||||||||||||||||||	GQHFDIYQGIGHEAGQAAGFYNHYGR
1	494	14	14	14	1	1	1	68	14	14	0	KLSLTHAGEATLER	||||||||||||||	KLSLTHAGEATLER
1	499	14	14	14	1	1	1	75	14	14	0	MNDSIYQEIEDNPR	||||||||||||||	MNDSIYQEIEDNPR
1	500	8	8	8	1	1	1	48	8	8	0	WGIGYLQK	||||||||	WGIGYLQK
1	503	17	17	17	1	1	1	78	17	17	0	LLIIFMVAAPLATVDIK	|||||||||||||||||	LLIIFMVAAPLATVDIK
1	506	28	28	28	1	1	1	140	28	28	0	GVGAHLLALANQHADSASNPRPVTLLIR	||||||||||||||||||||||||||||	GVGAHLLALANQHADSASNPRPVTLLIR
1	509	16	16	16	1	1	1	82	16	16	0	QQAVYAPLMEYIADNR	||||||||||||||||	QQAVYAPLMEYIADNR
1	510	15	15	15	1	1	1	72	15	15	0	GKGLATLLYEELVVK	|||||||||||||||	GKGLATLLYEELVVK
1	514	15	15	15	1	1	1	83	15	15	0	SHRFDIYPSSVTPPR	|||||||||||||||	SHRFDIYPSSVTPPR
1	517	13	13	13	1	1	1	64	13	13	0	LFDAELQPIAGVK	|||||||||||||	LFDAELQPIAGVK
1	518	16	16	16	1	1	1	82	16	16	0	LHQHALPSMDFVVLVK	||||||||||||||||	LHQHALPSMDFVVLVK
1	519	25	25	25	1	1	1	142	25	25	0	TRQHAIFCRYPPLALAFQKAWNTFF	|||||||||||||||||||||||||	TRQHAIFCRYPPLALAFQKAWNTFF
1	520	30	30	30	1	1	1	149	30	30	0	DALEDRVDGLDAGADDYLVKPFALAELLAR	||||||||||||||||||||||||||||||	DALEDRVDGLDAGADDYLVKPFALAELLAR
1	524	15	15	15	1	1	1	80	15	15	0	KLEHVASWQGINVER	|||||||||||||||	KLEHVASWQGINVER
1	526	13	13	13	1	1	1	63	13	13	0	SFAPIFAETAAER	|||||||||||||	SFAPIFAETAAER
1	527	25	25	25	1	1	1	126	25	25	0	MISMDWPAYILQMETLLAVALDEQR	|||||||||||||||||||||||||	MISMDWPAYILQMETLLAVALDEQR
1	528	13	13	13	1	1	1	67	13	13	0	SGHASVLAHPQLR	|||||||||||||	SGHASVLAHPQLR
1	530	22	22	22	1	1	1	102	22	22	0	NSSVITELLSLSCSSELSVTAP	||||||||||||||||||||||	NSSVITELLSLSCSSELSVTAP
1	531	13	13	13	1	1	1	60	13	13	0	DLSEIINQITAAK	|||||||||||||	DLSEIINQITAAK
1	533	19	19	19	1	1	1	87	19	19	0	NSAIASTIGLVEMAAQAGK	|||||||||||||||||||	NSAIASTIGLVEMAAQAGK
1	535	26	26	26	1	1	1	131	26	26	0	TLPQLTLPALEQVVQTWQQQSAELGK	||||||||||||||||||||||||||	TLPQLTLPALEQVVQTWQQQSAELGK
1	540	35	35	35	1	1	1	178	35	35	0	FHTSWAELPASLQFALEPILSAENFPAMLTAEQVK	|||||||||||||||||||||||||||||||||||	FHTSWAELPASLQFALEPILSAENFPAMLTAEQVK
1	544	22	22	22	1	1	1	102	22	22	0	AGIALPILNPESAILIQLSAVN	||||||||||||||||||||||	AGIALPILNPESAILIQLSAVN
1	545	16	16	16	1	1	1	89	16	16	0	DDNPTNWVAAIGPAAR	||||||||||||||||	DDNPTNWVAAIGPAAR
1	546	16	16	16	1	1	1	86	16	16	0	FIATLGAVGLCDCAGR	||||||||||||||||	FIATLGAVGLCDCAGR
1	548	8	8	8	1	1	1	46	8	8	0	YHSLDIHR	||||||||	YHSLDIHR
1	549	36	36	36	1	1	1	176	36	36	0	VGEAGAQLLSSLIAPNDVLGVSWGQTVLALSHAITR	||||||||||||||||||||||||||||||||||||	VGEAGAQLLSSLIAPNDVLGVSWGQTVLALSHAITR
1	553	17	17	17	1	1	1	84	17	17	0	LNFYASLPEALAALQNN	|||||||||||||||||	LNFYASLPEALAALQNN
1	554	22	22	22	1	1	1	107	22	22	0	IVTTLSGDFSSESDTVDPTVIK	||||||||||||||||||||||	IVTTLSGDFSSESDTVDPTVIK
1	556	10	10	10	1	1	1	65	10	10	0	APWFHHQEGK	||||||||||	APWFHHQEGK
1	560	16	16	16	1	1	1	84	16	16	0	AAEASTHYLLQNGHTR	||||||||||||||||	AAEASTHYLLQNGHTR
1	561	23	23	23	1	1	1	120	23	23	0	AAWMYYVAGQTQHEIAEALGVSR	|||||||||||||||||||||||	AAWMYYVAGQTQHEIAEALGVSR
1	562	15	15	15	1	1	1	69	15	15	0	DAETLALVEQINLAR	|||||||||||||||	DAETLALVEQINLAR
1	570	10	10	10	1	1	1	57	10	10	0	YMTLHRPAPK	||||||||||	YMTLHRPAPK
1	571	12	12	12	1	1	1	67	12	12	0	SYLDKTHQFYEK	||||||||||||	SYLDKTHQFYEK
1	574	31	31	31	1	1	1	159	31	31	0	WSAEYIPGIFRPELVDQVLDITQSVAEQTMR	|||||||||||||||||||||||||||||||	WSAEYIPGIFRPELVDQVLDITQSVAEQTMR
1	575	30	30	30	1	1	1	160	30	30	0	LGAGGDFAQAYVIAHEVGHHVQHLMGIDAK	||||||||||||||||||||||||||||||	LGAGGDFAQAYVIAHEVGHHVQHLMGIDAK
1	576	34	34	34	1	1	1	160	34	34	0	AIAIEPEVLLLDEPTSALDPISTLTIEELITTLK	||||||||||||||||||||||||||||||||||	AIAIEPEVLLLDEPTSALDPISTLTIEELITTLK
1	579	12	12	12	1	1	1	56	12	12	0	TGAAGSLVDILR	||||||||||||	TGAAGSLVDILR
1	580	17	17	17	1	1	1	93	17	17	0	IDRHEVQQHGLTLDNPR	|||||||||||||||||	IDRHEVQQHGLTLDNPR
1	581	32	32	32	1	1	1	154	32	32	0	MFDLSSIVDNEQTSDALEDVVMGLIINAGQAR	||||||||||||||||||||||||||||||||	MFDLSSIVDNEQTSDALEDVVMGLIINAGQAR
1	582	36	36	36	1	1	1	179	36	36	0	IMQFGDSVLPVGAFTFSNGVESAIQTGIVHDVATLK	||||||||||||||||||||||||||||||||||||	IMQFGDSVLPVGAFTFSNGVESAIQTGIVHDVATLK
1	583	23	23	23	1	1	1	116	23	23	0	AYVSGLSDEDFSDLAAYYASLKP	|||||||||||||||||||||||	AYVSGLSDEDFSDLAAYYASLKP
1	584	11	11	11	1	1	1	56	11	11	0	LAALGATVHHR	|||||||||||	LAALGATVHHR
1	588	27	27	27	1	1	1	130	27	27	0	VNSEALQQAGALGVIILGQEVHAIFGK	|||||||||||||||||||||||||||	VNSEALQQAGALGVIILGQEVHAIFGK
1	590	30	30	30	1	1	1	160	30	30	0	GQQLALDSYWPVMGVEYQAAPVDLNTLFGR	||||||||||||||||||||||||||||||	GQQLALDSYWPVMGVEYQAAPVDLNTLFGR
1	601	22	22	22	1	1	1	119	22	22	0	AGCKTRNTSGRSFSHCAISSPR	||||||||||||||||||||||	AGCKTRNTSGRSFSHCAISSPR
1	604	18	18	18	1	1	1	82	18	18	0	FAAIVLLLEEAEEELAGR	||||||||||||||||||	FAAIVLLLEEAEEELAGR
1	607	18	18	18	1	1	1	91	18	18	0	FGIEPEVMTEVLNTSTGR	||||||||||||||||||	FGIEPEVMTEVLNTSTGR
1	608	13	13	13	1	1	1	65	13	13	0	IHQLMTLVDIAPR	|||||||||||||	IHQLMTLVDIAPR
1	609	10	10	10	1	1	1	57	10	10	0	RVNAGPAWQR	||||||||||	RVNAGPAWQR
1	610	18	18	18	1	1	1	104	18	18	0	ETLFSTWPGPITWVIPAR	||||||||||||||||||	ETLFSTWPGPITWVIPAR
1	612	15	15	15	1	1	1	83	15	15	0	NWYHQAASLHVVTAR	|||||||||||||||	NWYHQAASLHVVTAR
1	617	26	26	26	1	1	1	129	26	26	0	QQLINAFDNSVLYTDSFIANVIDQMR	||||||||||||||||||||||||||	QQLINAFDNSVLYTDSFIANVIDQMR
1	621	13	13	13	1	1	1	69	13	13	0	GLRLTNRGTGDGR	|||||||||||||	GLRLTNRGTGDGR
1	622	23	23	23	1	1	1	121	23	23	0	ATSGEEWVGILQGPLPQESGIKR	|||||||||||||||||||||||	ATSGEEWVGILQGPLPQESGIKR
1	624	10	10	10	1	1	1	51	10	10	0	KLVDHLSNER	||||||||||	KLVDHLSNER
1	626	10	10	10	1	1	1	47	10	10	0	MVLGIISYSR	||||||||||	MVLGIISYSR
1	628	23	23	23	1	1	1	134	23	23	0	LCANTGCQLHLIKPLGFTWDDKR	|||||||||||||||||||||||	LCANTGCQLHLIKPLGFTWDDKR
1	630	17	17	17	1	1	1	87	17	17	0	HIMVVNKPSGLLSVPGR	|||||||||||||||||	HIMVVNKPSGLLSVPGR
1	634	25	25	25	1	1	1	126	25	25	0	MKINTLQSLINQQITQVGHGGQAGR	|||||||||||||||||||||||||	MKINTLQSLINQQITQVGHGGQAGR
1	635	32	32	32	1	1	1	159	32	32	0	TYSSLLEEFATELGLEEIETNELGHGAVTIDK	||||||||||||||||||||||||||||||||	TYSSLLEEFATELGLEEIETNELGHGAVTIDK
1	636	9	9	9	1	1	1	45	9	9	0	YGNISEVLR	|||||||||	YGNISEVLR
1	637	31	31	31	1	1	1	155	31	31	0	GGGTIAMLNEISSDTLEQLYSLAFNQYQSGK	|||||||||||||||||||||||||||||||	GGGTIAMLNEISSDTLEQLYSLAFNQYQSGK
1	638	15	15	15	1	1	1	68	15	15	0	SKLREELAELTAELK	|||||||||||||||	SKLREELAELTAELK
1	540	35	36	35	1	1	0.972	168	35	35	1	FHTSWAELPASLQFALEPILSAENFPAM-LTAEQVK	|||||||||||||||||||||||||||| |||||||	FHTSWAELPASLQFALEPILSAENFPAM*LTAEQVK
1	637	31	32	31	1	1	0.969	145	31	31	1	GGGTIAM-LNEISSDTLEQLYSLAFNQYQSGK	||||||| ||||||||||||||||||||||||	GGGTIAM*LNEISSDTLEQLYSLAFNQYQSGK
1	575	30	31	30	1	1	0.968	150	30	30	1	LGAGGDFAQAYVIAHEVGHHVQHLM-GIDAK	||||||||||||||||||||||||| |||||	LGAGGDFAQAYVIAHEVGHHVQHLM*GIDAK
1	590	30	31	30	1	1	0.968	150	30	30	1	GQQLALDSYWPVM-GVEYQAAPVDLNTLFGR	||||||||||||| |||||||||||||||||	GQQLALDSYWPVM*GVEYQAAPVDLNTLFGR
1	144	27	28	27	1	1	0.964	125	27	27	1	RGHRPDLDDDELASSM-ALSPELIAQLK	|||||||||||||||| |||||||||||	RGHRPDLDDDELASSM*ALSPELIAQLK
1	630	17	18	17	1	1	0.944	77	17	17	1	HIM-VVNKPSGLLSVPGR	||| ||||||||||||||	HIM*VVNKPSGLLSVPGR
1	518	16	17	16	1	1	0.941	72	16	16	1	LHQHALPSM-DFVVLVK	||||||||| |||||||	LHQHALPSM*DFVVLVK
1	92	15	16	15	1	1	0.938	68	15	15	1	HSFATHM-LESSGDLR	||||||| ||||||||	HSFATHM*LESSGDLR
1	472	15	16	15	1	1	0.938	69	15	15	1	DNSPDVVSANNM-DNR	|||||||||||| |||	DNSPDVVSANNM*DNR
1	49	11	12	11	1	1	0.917	50	11	11	1	HSHIVNM-FEQR	||||||| ||||	HSHIVNM*FEQR
1	56	11	12	11	1	1	0.917	46	11	11	1	NDTAVM-VTHAR	|||||| |||||	NDTAVM*VTHAR
1	386	19	20	19	1	1	0.95	93	19	19	0	VNPDMVFSLPLLGSELLVR	|||||||||||||||||||	VNPDMVFSLPLLGSELLVR
1	122	22	24	22	1	1	0.917	116	22	22	0	NHNLGASVSALTLEHYPGMTEK	||||||||||||||||||||||	NHNLGASVSALTLEHYPGMTEK
1	116	10	11	10	1	1	0.909	49	10	10	0	NIDVDKIEAK	||||||||||	NIDVDKIEAK
1	637	31	37	31	1	1	0.838	155	31	31	0	GGGTIAMLNEISSDTLEQLYSLAFNQYQSGK	|||||||||||||||||||||||||||||||	GGGTIAMLNEISSDTLEQLYSLAFNQYQSGK
1	449	13	16	13	1	1	0.812	65	13	13	0	FIPLQGLILTPLM	|||||||||||||	FIPLQGLILTPLM
1	90	12	15	12	1	1	0.8	54	12	12	0	ATVIQQFAALLE	||||||||||||	ATVIQQFAALLE
1	89	12	16	12	1	1	0.75	57	12	12	0	VPVPLVIESQVK	||||||||||||	VPVPLVIESQVK
1	56	11	15	11	1	1	0.733	56	11	11	0	NDTAVMVTHAR	|||||||||||	NDTAVMVTHAR
1	46	33	33	32	1	0.97	0.97	159	33	33	0	DKAVFPAIAALGGM*LAPALIYLLFNGADEVTR	|||||||||||||||||||||||||||||||||	DKAVFPAIAALGGM*LAPALIYLLFNGADEVTR
1	330	32	32	31	1	0.969	0.969	150	32	32	0	DAVEAAQASLDM*AVQQYNANQALVLNTPLEK	||||||||||||||||||||||||||||||||	DAVEAAQASLDM*AVQQYNANQALVLNTPLEK
1	404	23	23	22	1	0.957	0.957	128	23	23	0	MGKLM*GRWPWRIKVSWMKQSKR	|||||||||||||||||||||||	MGKLM*GRWPWRIKVSWMKQSKR
1	345	22	22	21	1	0.955	0.955	106	22	22	0	DLSAEPTSVILLGGYVVM*DPK	||||||||||||||||||||||	DLSAEPTSVILLGGYVVM*DPK
1	615	18	18	17	1	0.944	0.944	97	18	18	0	DSNIWFM*QLGHDVYQAK	||||||||||||||||||	DSNIWFM*QLGHDVYQAK
1	57	12	12	11	1	0.917	0.917	57	12	12	0	KIIIDNM*LFYR	||||||||||||	KIIIDNM*LFYR
1	201	12	12	11	1	0.917	0.917	58	12	12	0	CTVAKLGM*GIR	||||||||||||	CTVAKLGM*GIR
1	521	12	12	11	1	0.917	0.917	55	12	12	0	LNSEGM*QTVQK	||||||||||||	LNSEGM*QTVQK
1	521	12	13	11	1	0.917	0.846	55	12	12	0	LNSEGM*QTVQK	||||||||||||	LNSEGM*QTVQK
1	149	11	11	10	1	0.909	0.909	52	11	11	0	DVM*EQPTVQR	|||||||||||	DVM*EQPTVQR
1	479	11	11	10	1	0.909	0.909	48	11	11	0	M*RSITAIAYK	|||||||||||	M*RSITAIAYK
0.969	330	32	31	31	0.969	0.969	1	139	31	31	1	DAVEAAQASLDM*AVQQYNANQALVLNTPLEK	|||||||||||| |||||||||||||||||||	DAVEAAQASLDM-AVQQYNANQALVLNTPLEK
0.944	603	18	24	17	0.944	0.944	0.708	64	17	17	1	LGM*LIAIVKILIVIAKR	||| ||||||||||||||	LGM-LIAIVKILIVIAKR
0.917	521	12	12	11	0.917	0.917	0.917	44	11	11	1	LNSEGM*QTVQK	|||||| |||||	LNSEGM-QTVQK
0.963	144	27	26	26	0.963	0.963	1	130	26	26	0	GHRPDLDDDELASSMALSPELIAQLK	||||||||||||||||||||||||||	GHRPDLDDDELASSMALSPELIAQLK
0.923	449	13	12	12	0.923	0.923	1	60	12	12	0	FIPLQGLILTPL	||||||||||||	FIPLQGLILTPL
0.92	634	25	23	23	0.92	0.92	1	116	23	23	0	INTLQSLINQQITQVGHGGQAGR	|||||||||||||||||||||||	INTLQSLINQQITQVGHGGQAGR
0.871	637	31	27	27	0.871	0.871	1	135	27	27	0	GGGTIAMLNEISSDTLEQLYSLAFNQY	|||||||||||||||||||||||||||	GGGTIAMLNEISSDTLEQLYSLAFNQY
0.867	638	15	13	13	0.867	0.867	1	59	13	13	0	LREELAELTAELK	|||||||||||||	LREELAELTAELK
0.833	63	24	20	20	0.833	0.833	1	100	20	20	0	KPSILVFDEATSALDTHTER	||||||||||||||||||||	KPSILVFDEATSALDTHTER
0.733	369	30	22	22	0.733	0.733	1	110	22	22	0	IAGSVLGAVAGGVLGHQVGGGR	||||||||||||||||||||||	IAGSVLGAVAGGVLGHQVGGGR
0.536	103	28	15	15	0.536	0.536	1	70	15	15	0	LPISEVIADNVTASR	|||||||||||||||	LPISEVIADNVTASR
0.5	338	18	9	9	0.5	0.5	1	49	9	9	0	WLEAVLPLF	|||||||||	WLEAVLPLF
0.467	80	15	7	7	0.467	0.467	1	37	7	7	0	HQGQLIK	|||||||	HQGQLIK
0.944	145	18	18	17	0.944	0.944	0.944	84	17	17	0	QQDLSATPQTPSTAESQ	|||||||||||||||||	QQDLSATPQTPSTAESQ
0.96	634	25	26	24	0.96	0.96	0.923	121	24	24	0	KINTLQSLINQQITQVGHGGQAGR	||||||||||||||||||||||||	KINTLQSLINQQITQVGHGGQAGR
0.846	435	13	12	11	0.846	0.846	0.917	58	11	11	0	ITHSPHTIASR	|||||||||||	ITHSPHTIASR
0.667	596	12	9	8	0.667	0.667	0.889	43	8	8	0	LGEPIDGK	||||||||	LGEPIDGK
0.917	152	12	13	11	0.917	0.917	0.846	59	11	11	0	TLAPSDHNDVK	|||||||||||	TLAPSDHNDVK
0.875	151	16	18	14	0.875	0.875	0.778	77	14	14	0	HGISYIYVTQHLGM	||||||||||||||	HGISYIYVTQHLGM
0.241	513	29	12	7	0.241	0.241	0.583	41	7	7	0	GVQFHPE	|||||||	GVQFHPE
0.241	513	29	13	7	0.241	0.241	0.538	41	7	7	0	GVQFHPE	|||||||	GVQFHPE
0.241	513	29	14	7	0.241	0.241	0.5	41	7	7	0	GVQFHPE	|||||||	GVQFHPE
0.333	582	36	36	12	0.333	0.333	0.333	60	12	12	0	QTGIVHDVATLK	||||||||||||	QTGIVHDVATLK
0.28	527	25	27	7	0.28	0.28	0.259	36	7	7	0	PAYILQM	|||||||	PAYILQM
0.533	562	15	31	8	0.533	0.533	0.258	36	8	8	0	ETLALVEQ	||||||||	ETLALVEQ
0.28	527	25	28	7	0.28	0.28	0.25	36	7	7	0	PAYILQM	|||||||	PAYILQM
0.28	527	25	28	7	0.28	0.28	0.25	36	7	7	0	PAYILQM	|||||||	PAYILQM
0.28	527	25	29	7	0.28	0.28	0.241	36	7	7	0	PAYILQM	|||||||	PAYILQM
