# Supplementary material for: Comparative Omics-Driven Genome Annotation Refinement: Application across Yersiniae
Source: PubMed Central journal article supplement (PMC3313959; doi:10.1371/journal.pone.0033903), 2012-03-27

Yersinia pestis CO92

argD locus split by insertion

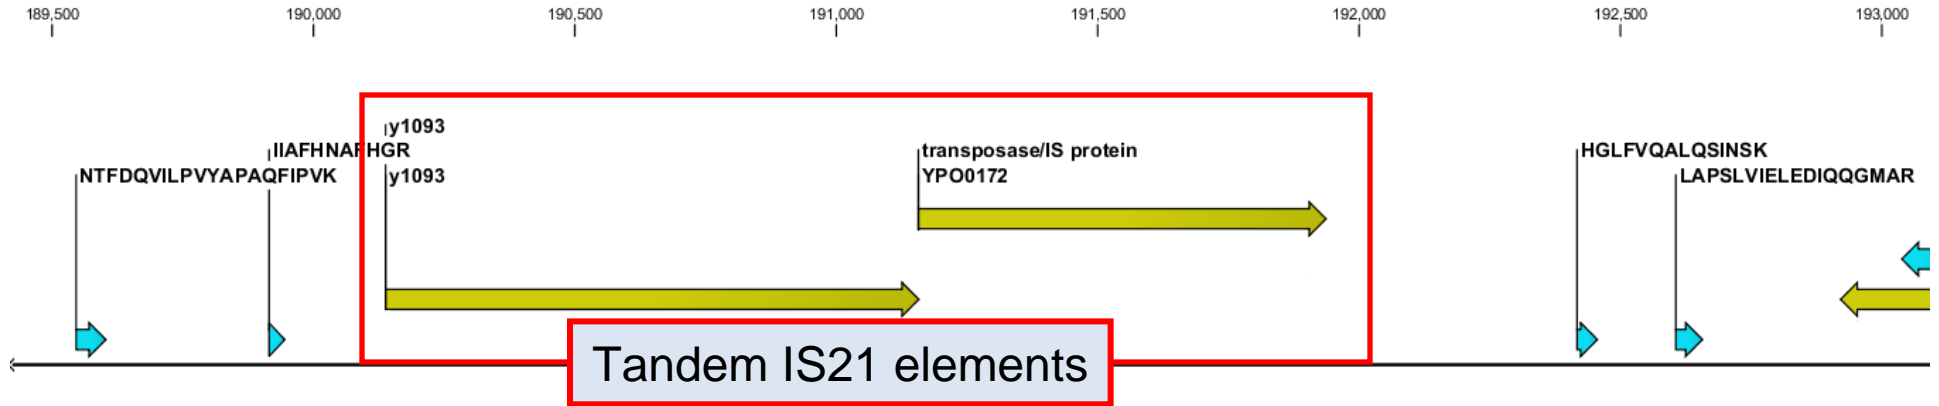

Yersinia pestis Pestoides F

argD locus

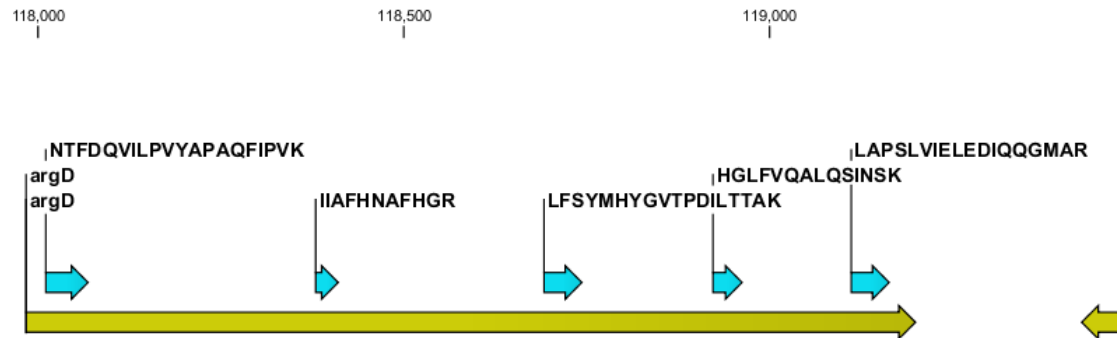

Supplement: pone.0033903.s003.pdf [file pone.0033903.s003.pdf]
