# Supplementary material for: Comparative Omics-Driven Genome Annotation Refinement: Application across Yersiniae
Source: PubMed Central journal article supplement (PMC3313959; doi:10.1371/journal.pone.0033903), 2012-03-27
Supplement: pone.0033903.s005.pdf [file pone.0033903.s005.pdf]

Error 33: YPO3723

ORF location (reading frame : base position): COchrom1:4167022-4167372

Peptide: AATQNTPAATGQVQSLTR

MS-GF p-value: 4.51E-19

| Scan | Charge | Xcorr  | Sp    | DeltaCn | ORF                      | Peptide                |
|------|--------|--------|-------|---------|--------------------------|------------------------|
| 2464 | 2      | 3.8359 | 437.2 | 0.4123  | COchrom1:4167022-4167372 | K.AATQNTPAATGQVQSLTR.G |

COchrom1\_4167022\_4167372 #2464 RT: 13.49 AV: 1 NL: 1.78E5

T: ITMS + c NSI d Full ms2 908.66@cid35.

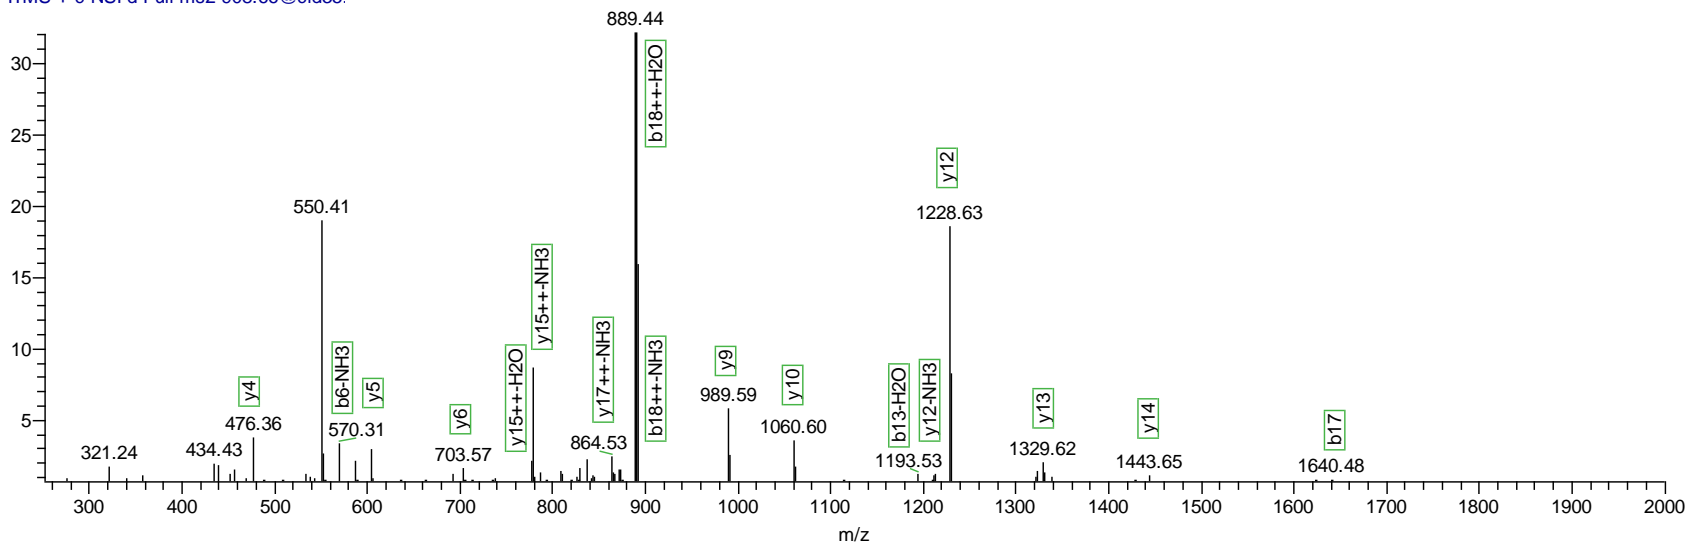

Fragment Ladder (cyan shows ions that match, yellow shows ions with shoulders) :

| #  | Immon. | b       | b++    | b+++H2O | b+++NH3 | b-H2O   | b-NH3   | Seq. | y       | y++    | y+++H2O | y+++NH3 | y-H2O   | y-NH3   | #  |
|----|--------|---------|--------|---------|---------|---------|---------|------|---------|--------|---------|---------|---------|---------|----|
| 1  | 44.05  |         |        |         |         |         |         | A    | 1814.94 | 907.97 | 898.97  | 899.46  | 1796.92 | 1797.91 | 18 |
| 2  | 44.05  | 143.08  |        |         |         |         |         | A    | 1743.90 | 872.45 | 863.45  | 863.94  | 1725.89 | 1726.87 | 17 |
| 3  | 74.06  | 244.13  |        |         |         | 226.12  |         | T    | 1672.86 | 836.93 | 827.93  | 828.42  | 1654.85 | 1655.83 | 16 |
| 4  | 101.07 | 372.19  |        |         |         | 354.18  | 355.16  | Q    | 1571.81 | 786.41 | 777.40  | 777.90  | 1553.80 | 1554.79 | 15 |
| 5  | 87.06  | 486.23  |        |         |         | 468.22  | 469.20  | N    | 1443.75 | 722.38 | 713.38  | 713.87  | 1425.74 | 1426.73 | 14 |
| 6  | 74.06  | 587.28  |        |         |         | 569.27  | 570.25  | T    | 1329.71 | 665.36 | 656.35  | 656.85  | 1311.70 | 1312.69 | 13 |
| 7  | 70.07  | 684.33  |        |         |         | 666.32  | 667.31  | P    | 1228.66 | 614.84 | 605.83  | 606.32  | 1210.65 | 1211.64 | 12 |
| 8  | 44.05  | 755.37  |        |         |         | 737.36  | 738.34  | A    | 1131.61 | 566.31 | 557.30  | 557.80  | 1113.60 | 1114.58 | 11 |
| 9  | 44.05  | 826.41  | 413.71 | 404.70  | 405.19  | 808.40  | 809.38  | A    | 1060.57 | 530.79 | 521.79  | 522.28  | 1042.56 | 1043.55 | 10 |
| 10 | 74.06  | 927.45  | 464.23 | 455.23  | 455.72  | 909.44  | 910.43  | T    | 989.54  | 495.27 | 486.27  | 486.76  | 971.53  | 972.51  | 9  |
| 11 | 30.03  | 984.48  | 492.74 | 483.74  | 484.23  | 966.46  | 967.45  | G    | 888.49  | 444.75 | 435.74  | 436.23  | 870.48  | 871.46  | 8  |
| 12 | 101.07 | 1112.53 | 556.77 | 547.77  | 548.26  | 1094.52 | 1095.51 | Q    | 831.47  | 416.24 | 407.23  | 407.72  | 813.46  | 814.44  | 7  |
| 13 | 72.08  | 1211.60 | 606.30 | 597.30  | 597.79  | 1193.59 | 1194.58 | V    | 703.41  |        |         |         | 685.40  | 686.38  | 6  |
| 14 | 101.07 | 1339.66 | 670.33 | 661.33  | 661.82  | 1321.65 | 1322.63 | Q    | 604.34  |        |         |         | 586.33  | 587.31  | 5  |
| 15 | 60.04  | 1426.69 | 713.85 | 704.84  | 705.34  | 1408.68 | 1409.67 | S    | 476.28  |        |         |         | 458.27  | 459.26  | 4  |
| 16 | 86.10  | 1539.78 | 770.39 | 761.39  | 761.88  | 1521.77 | 1522.75 | L    | 389.25  |        |         |         | 371.24  | 372.22  | 3  |
| 17 | 74.06  | 1640.82 | 820.92 | 811.91  | 812.40  | 1622.81 | 1623.80 | T    | 276.17  |        |         |         | 258.16  | 259.14  | 2  |
| 18 | 129.11 |         |        |         |         |         |         | R    | 175.12  |        |         |         | 158.09  | 159.07  | 1  |

Error 47: YPO2654.5

ORF location (reading frame : base position): COchrom6:2982147-2982434

Peptide: DAAAFNLHLNSQHK

MS-GF p-value: 9.38E-17

| Scan | Charge | Xcorr  | Sp    | DeltaCn | ORF                      | Peptide            |
|------|--------|--------|-------|---------|--------------------------|--------------------|
| 3724 | 2      | 4.2457 | 827.5 | 0.4156  | COchrom6:2982147-2982434 | K.DAAAFNLHLNSQHK.N |

SBEF\_YPCO\_019\_18\_27Apr10\_Sphinx\_10-01-10 #3724 RT: 20.00 AV: 1 NL: 2.23E4  
 T: ITMS + c NSI d Full ms2 783.73@cid35.

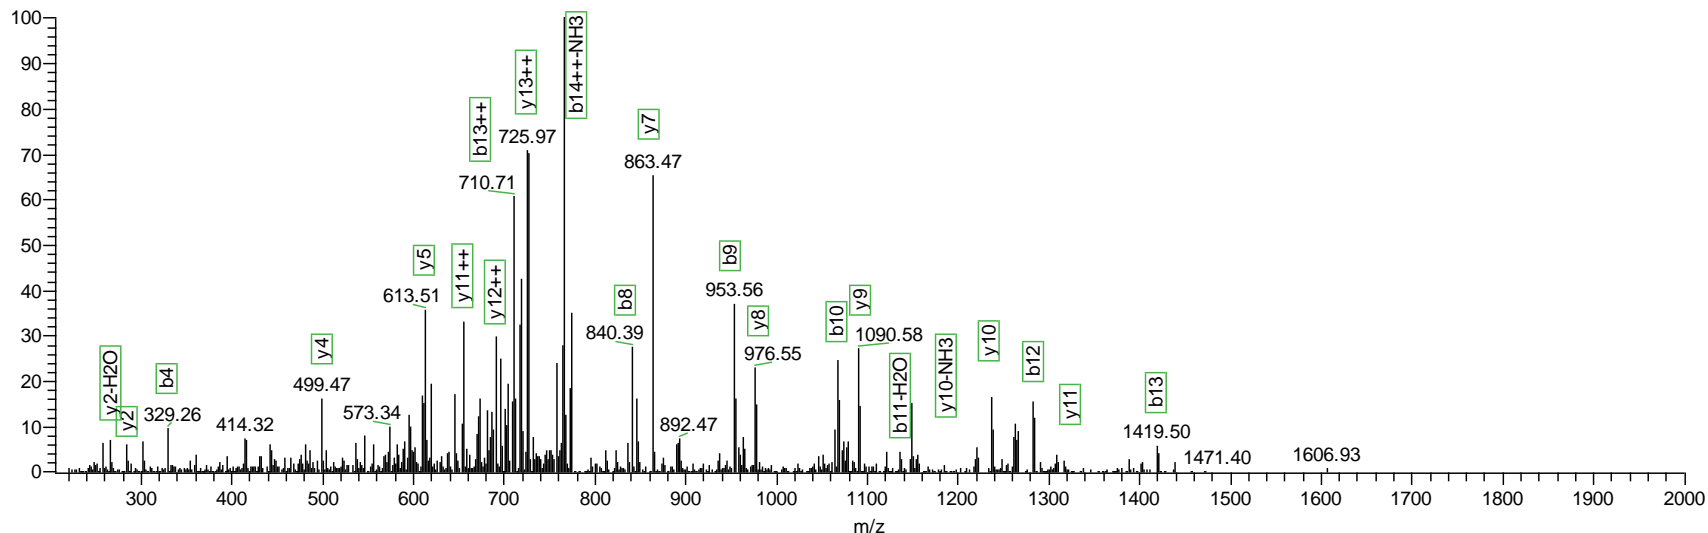

Fragment Ladder (cyan shows ions that match, yellow shows ions with shoulders) :

| #  | Immon. | b       | b++    | b++-H2O | b++-NH3 | b-H2O   | b-NH3   | Seq. | y       | y++    | y++-H2O | y++-NH3 | y-H2O   | y-NH3   | #  |
|----|--------|---------|--------|---------|---------|---------|---------|------|---------|--------|---------|---------|---------|---------|----|
| 1  | 88.04  |         |        |         |         |         |         | D    | 1565.78 | 783.39 | 774.39  | 774.88  | 1547.77 | 1548.76 | 14 |
| 2  | 44.05  | 187.07  |        |         |         | 169.06  |         | A    | 1450.75 | 725.88 | 716.88  | 717.37  | 1432.74 | 1433.73 | 13 |
| 3  | 44.05  | 258.11  |        |         |         | 240.10  |         | A    | 1379.72 | 690.36 | 681.36  | 681.85  | 1361.71 | 1362.69 | 12 |
| 4  | 44.05  | 329.15  |        |         |         | 311.14  |         | A    | 1308.68 | 654.84 | 645.84  | 646.33  | 1290.67 | 1291.65 | 11 |
| 5  | 120.08 | 476.21  |        |         |         | 458.20  |         | F    | 1237.64 | 619.33 | 610.32  | 610.81  | 1219.63 | 1220.62 | 10 |
| 6  | 87.06  | 590.26  |        |         |         | 572.25  | 573.23  | N    | 1090.57 | 545.79 | 536.79  | 537.28  | 1072.56 | 1073.55 | 9  |
| 7  | 86.10  | 703.34  |        |         |         | 685.33  | 686.31  | L    | 976.53  | 488.77 | 479.76  | 480.26  | 958.52  | 959.51  | 8  |
| 8  | 110.07 | 840.40  | 420.70 | 411.70  | 412.19  | 822.39  | 823.37  | H    | 863.45  | 432.23 | 423.22  | 423.71  | 845.44  | 846.42  | 7  |
| 9  | 86.10  | 953.48  | 477.25 | 468.24  | 468.73  | 935.47  | 936.46  | L    | 726.39  |        |         |         | 708.38  | 709.36  | 6  |
| 10 | 87.06  | 1067.53 | 534.27 | 525.26  | 525.75  | 1049.52 | 1050.50 | N    | 613.30  |        |         |         | 595.29  | 596.28  | 5  |
| 11 | 60.04  | 1154.56 | 577.78 | 568.78  | 569.27  | 1136.55 | 1137.53 | S    | 499.26  |        |         |         | 481.25  | 482.24  | 4  |
| 12 | 101.07 | 1282.62 | 641.81 | 632.81  | 633.30  | 1264.61 | 1265.59 | Q    | 412.23  |        |         |         | 395.20  |         | 3  |
| 13 | 110.07 | 1419.68 | 710.34 | 701.34  | 701.83  | 1401.67 | 1402.65 | H    | 284.17  |        |         |         | 267.14  |         | 2  |
| 14 | 101.11 |         |        |         |         |         |         | K    | 147.11  |        |         |         | 130.09  |         | 1  |

Error 61: YPDSF\_2565

ORF location (reading frame : base position): PFchrom4:2913628-2914533

Peptide: FPSTVNAAEIVAK

MS-GF p-value: 9.84E-14

| Scan | Charge | Xcorr  | Sp    | DeltaCn | ORF                      | Peptide           |
|------|--------|--------|-------|---------|--------------------------|-------------------|
| 2998 | 2      | 2.9174 | 579.1 | 0.2803  | PFchrom4:2913628-2914533 | K.FPSTVNAAEIVAK.T |

SBEP\_YPPF\_011\_13\_20Apr10\_Sphinx\_10-01-07 #2998 RT: 15.74 AV: 1 NL: 6.25E4

T: ITMS + c NSI d Full ms2 669.57@cid35.

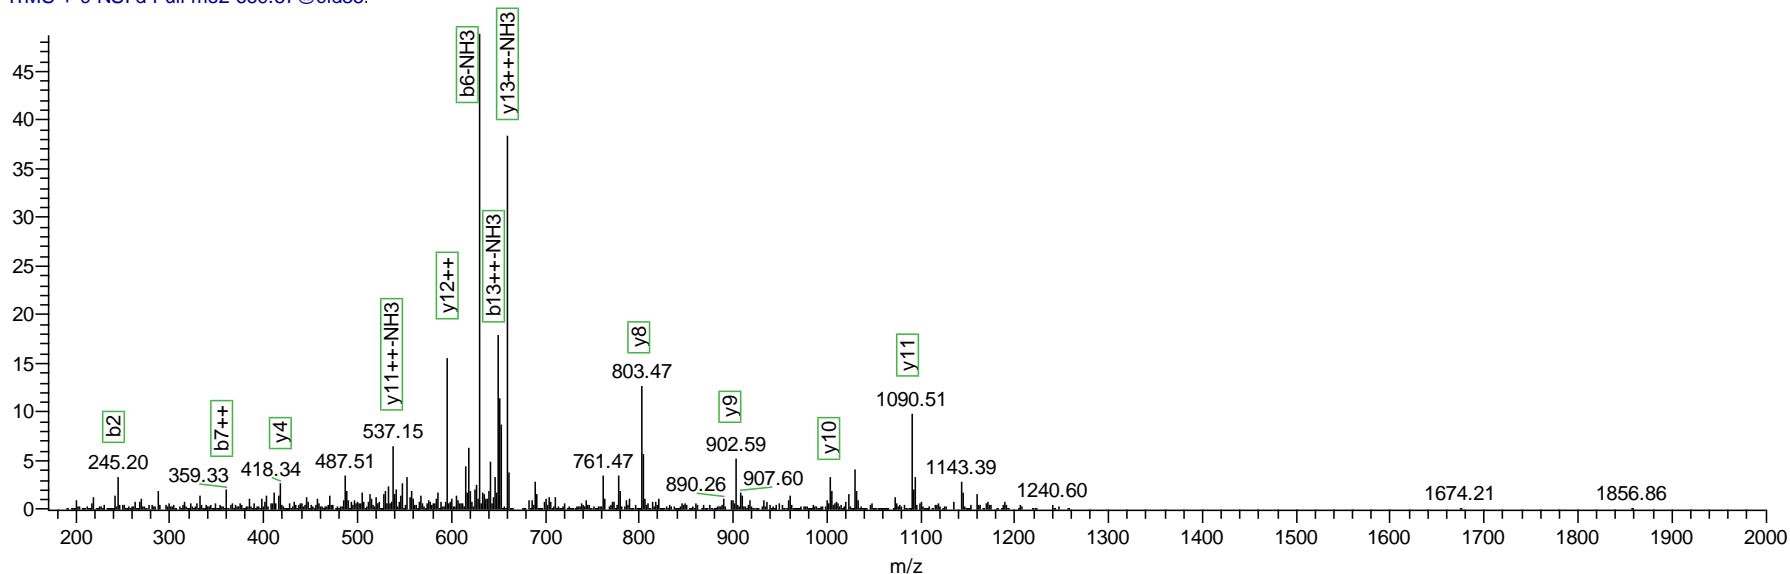

Fragment Ladder (cyan shows ions that match, yellow shows ions with shoulders) :

| #  | Immon. | b       | b++    | b+++H2O | b+++NH3 | b-H2O   | b-NH3   | Seq. | y       | y++    | y++H2O | y++NH3 | y-H2O   | y-NH3   | #  |
|----|--------|---------|--------|---------|---------|---------|---------|------|---------|--------|--------|--------|---------|---------|----|
| 1  | 120.08 |         |        |         |         |         |         | F    | 1334.70 | 667.85 | 658.85 | 659.34 | 1316.68 | 1317.67 | 13 |
| 2  | 70.07  | 245.13  |        |         |         |         |         | P    | 1187.63 | 594.32 | 585.31 | 585.80 | 1169.62 | 1170.60 | 12 |
| 3  | 60.04  | 332.16  |        |         |         | 314.15  |         | S    | 1090.57 | 545.79 | 536.79 | 537.28 | 1072.56 | 1073.55 | 11 |
| 4  | 74.06  | 433.21  |        |         |         | 415.20  |         | T    | 1003.54 | 502.27 | 493.27 | 493.76 | 985.53  | 986.51  | 10 |
| 5  | 72.08  | 532.28  |        |         |         | 514.27  |         | V    | 902.49  | 451.75 | 442.75 | 443.24 | 884.48  | 885.47  | 9  |
| 6  | 87.06  | 646.32  |        |         |         | 628.31  | 629.29  | N    | 803.43  | 402.22 | 393.21 | 393.70 | 785.41  | 786.40  | 8  |
| 7  | 44.05  | 717.36  |        |         |         | 699.35  | 700.33  | A    | 689.38  |        |        |        | 671.37  | 672.36  | 7  |
| 8  | 44.05  | 788.39  |        |         |         | 770.38  | 771.37  | A    | 618.35  |        |        |        | 600.33  | 601.32  | 6  |
| 9  | 102.06 | 917.44  | 459.22 | 450.22  | 450.71  | 899.43  | 900.41  | E    | 547.31  |        |        |        | 529.30  | 530.28  | 5  |
| 10 | 74.06  | 1018.48 | 509.75 | 500.74  | 501.23  | 1000.47 | 1001.46 | T    | 418.27  |        |        |        | 400.25  | 401.24  | 4  |
| 11 | 72.08  | 1117.55 | 559.28 | 550.27  | 550.77  | 1099.54 | 1100.53 | V    | 317.22  |        |        |        |         | 300.19  | 3  |
| 12 | 44.05  | 1188.59 | 594.80 | 585.79  | 586.29  | 1170.58 | 1171.56 | A    | 218.15  |        |        |        |         | 201.12  | 2  |
| 13 | 101.11 |         |        |         |         |         |         | K    | 147.11  |        |        |        |         | 130.09  | 1  |
